# Supplementary material for: The long non-coding RNA LNC_000397 negatively regulates PRRSV replication through induction of interferon-stimulated genes
Source: Virol J. 2022 Mar 5;19:40. doi: 10.1186/s12985-022-01761-x (PMC8897765; doi:10.1186/s12985-022-01761-x)
Supplement: Supplementary file 2 — Additional file 2: Table S1 Lists differently expressed mRNAs upon GSWW and VR2332 infection compared to Mock infection. [file 12985_2022_1761_MOESM2_ESM.xlsx]

## Sheet: GSWW
transcript_id	gene_id	gene_name	gene_location	GSWW_FPKM	Mock_FPKM	log2(foldchange)	pvalue	qvalue	Gene_description	GO_id	GO_description	KO_id	KO_pathway
ENSSSCT00000030655	ENSSSCG00000025988	-	GL893093.2:30869-48101	0.769096	1.27518	-0.729466	0.03015	0.348113	--	GO:0003824,GO:0016787,GO:0016311,GO:0006796,GO:0006793,GO:0046488,GO:0003674,GO:0019637,GO:0046856,GO:0046839,GO:0006650,GO:0030258,GO:0071704,GO:0044238,GO:0008152,GO:0008150,GO:0046486,GO:0006644,GO:0009987,GO:0044237,GO:0006629,GO:0044710,GO:0044255	catalytic activity,hydrolase activity,dephosphorylation,phosphate-containing compound metabolic process,phosphorus metabolic process,phosphatidylinositol metabolic process,molecular_function,organophosphate metabolic process,phosphatidylinositol dephosphorylation,phospholipid dephosphorylation,glycerophospholipid metabolic process,lipid modification,organic substance metabolic process,primary met…	--	--
ENSSSCT00000013818	ENSSSCG00000012637	KLHL13	chrX:115091103-115105099	0.951634	1.6467	-0.7911	0.01135	0.198476	kelch like family member 13 [Source:HGNC Symbol;Acc:HGNC:22931]	--	--	ssc04120	Ubiquitin mediated proteolysis
ENSSSCT00000029642	ENSSSCG00000027862	FAM200B	chr8:10648966-10650934	9.17196	14.0269	-0.612898	0.00025	0.0125444	family with sequence similarity 200 member B [Source:HGNC Symbol;Acc:HGNC:27740]	--	--	--	--
ENSSSCT00000001758	ENSSSCG00000001579	-	chr7:37905565-37968899	21.4662	15.8576	0.436887	0.00215	0.0654264	--	--	--	--	--
ENSSSCT00000017482	ENSSSCG00000016057	STAT1	JH118841.1:95633-132917	228.788	145.936	0.648677	5e-05	0.00318682	Sus scrofa signal transducer and activator of transcription 1, 91kDa (STAT1), mRNA. [Source:RefSeq mRNA;Acc:NM_213769]	GO:0043231,GO:0005634,GO:0043229,GO:0005488,GO:0044424,GO:0005737,GO:0043227,GO:0043226,GO:0005622,GO:0003676,GO:0050896,GO:1901363,GO:0097159,GO:0003674,GO:0044238,GO:0034641,GO:0006139,GO:0044237,GO:0046483,GO:0006725,GO:0010467,GO:0071704,GO:0051716,GO:0008152,GO:1901360,GO:0006807,GO:0019222,GO:0044260,GO:0010468,GO:0044464,GO:0090304,GO:0005623,GO:0003677,GO:0043170,GO:0001071,GO:0003700,GO:…	intracellular membrane-bounded organelle,nucleus,intracellular organelle,binding,intracellular part,cytoplasm,membrane-bounded organelle,organelle,intracellular,nucleic acid binding,response to stimulus,heterocyclic compound binding,organic cyclic compound binding,molecular_function,primary metabolic process,cellular nitrogen compound metabolic process,nucleobase-containing compound metabolic pro…	ssc05164,ssc05168,ssc04620,ssc05162,ssc05161,ssc05160,ssc05140,ssc04380,ssc04062,ssc05200,ssc05152,ssc04917,ssc05145,ssc04630,ssc05321,ssc05212,ssc04919	Influenza A,Herpes simplex infection,Toll-like receptor signaling pathway,Measles,Hepatitis B,Hepatitis C,Leishmaniasis,Osteoclast differentiation,Chemokine signaling pathway,Pathways in cancer,Tuberculosis,Prolactin signaling pathway,Toxoplasmosis,Jak-STAT signaling pathway,Inflammatory bowel disease (IBD),Pancreatic cancer,Thyroid hormone signaling pathway
ENSSSCT00000029406	ENSSSCG00000022144	QPCTL	GL896302.1:53945-58928	1.295	0.611817	1.08178	0.0247	0.311131	glutaminyl-peptide cyclotransferase-like [Source:HGNC Symbol;Acc:HGNC:25952]	--	--	--	--
ENSSSCT00000029409	ENSSSCG00000029494	RBBP9	chr17:30230128-30239286	9.94045	12.6661	-0.349594	0.02695	0.326927	retinoblastoma binding protein 9 [Source:HGNC Symbol;Acc:HGNC:9892]	--	--	--	--
ENSSSCT00000019463	ENSSSCG00000017886	FBXO39	chr12:52636411-52639252	2.11545	0.710849	1.57335	5e-05	0.00318682	F-box protein 39 [Source:HGNC Symbol;Acc:HGNC:28565]	--	--	--	--
ENSSSCT00000017979	ENSSSCG00000016512	ZC3HAV1	chr18:11014952-11070159	30.2409	24.288	0.316259	0.02055	0.283648	zinc finger CCCH-type, antiviral 1 [Source:HGNC Symbol;Acc:HGNC:23721]	--	--	--	--
ENSSSCT00000003517	ENSSSCG00000003167	-	chr6:50281969-50292760	3.63823	2.40129	0.599428	0.03655	0.385567	--	--	--	ssc05200,ssc04060,ssc04640	Pathways in cancer,Cytokine-cytokine receptor interaction,Hematopoietic cell lineage
ENSSSCT00000028418	ENSSSCG00000029475	TRIM25	chr12:34136166-34138282	49.1029	28.3695	0.791465	5e-05	0.00318682	tripartite motif containing 25 [Source:HGNC Symbol;Acc:HGNC:12932]	--	--	ssc05164,ssc04622,ssc04064	Influenza A,RIG-I-like receptor signaling pathway,NF-kappa B signaling pathway
ENSSSCT00000004982	ENSSSCG00000004510	ACAA2	chr1:108842619-108870348	29.772	36.6724	-0.300741	0.0335	0.368671	acetyl-CoA acyltransferase 2 [Source:HGNC Symbol;Acc:HGNC:83]	--	--	ssc01212,ssc00071,ssc00062,ssc00280,ssc01100	Fatty acid metabolism,Fatty acid degradation,Fatty acid elongation,Valine, leucine and isoleucine degradation,Metabolic pathways
ENSSSCT00000006217	ENSSSCG00000005654	SPTAN1	chr1:302971842-303054229	40.582	32.8611	0.304458	0.03225	0.361044	spectrin, alpha, non-erythrocytic 1 [Source:HGNC Symbol;Acc:HGNC:11273]	--	--	--	--
ENSSSCT00000007168	ENSSSCG00000006543	ADAR	chr4:104004653-104023302	26.5584	13.1087	1.01864	5e-05	0.00318682	adenosine deaminase, RNA-specific [Source:HGNC Symbol;Acc:HGNC:225]	--	--	ssc05164,ssc04623,ssc05162	Influenza A,Cytosolic DNA-sensing pathway,Measles
ENSSSCT00000030462	ENSSSCG00000023216	-	chr8:78969471-78985250	3.73426	4.99174	-0.418721	0.0437	0.422518	--	GO:0044424,GO:0005622,GO:0010467,GO:0043231,GO:0043229,GO:0043227,GO:0005515,GO:0043226,GO:0005634,GO:0090304,GO:0071013,GO:0005575,GO:0016070,GO:0043170,GO:0044260,GO:1901360,GO:0044446,GO:0005488,GO:0032993,GO:0044422,GO:0071704,GO:0034641,GO:0032991,GO:0005681,GO:0044238,GO:0031461,GO:0030529,GO:0006139,GO:0046483,GO:0008152,GO:0016071,GO:0006725,GO:0044237,GO:0044428,GO:0005623,GO:0006807,GO:…	intracellular part,intracellular,gene expression,intracellular membrane-bounded organelle,intracellular organelle,membrane-bounded organelle,protein binding,organelle,nucleus,nucleic acid metabolic process,catalytic step 2 spliceosome,cellular_component,RNA metabolic process,macromolecule metabolic process,cellular macromolecule metabolic process,organic cyclic compound metabolic process,intracel…	ssc03040	Spliceosome
ENSSSCT00000030461	ENSSSCG00000021964	-	chr16:50135842-50164238	6.51763	5.28568	0.302257	0.0454	0.429859	--	--	--	ssc05164,ssc05162,ssc04620,ssc05160,ssc04380,ssc05142,ssc05161,ssc04668,ssc05210,ssc04930,ssc05145,ssc05221,ssc04630,ssc04062,ssc05212,ssc05203,ssc04917,ssc04660,ssc04210,ssc04150,ssc04068,ssc04666,ssc05211,ssc05213,ssc05215,ssc04012,ssc04066,ssc04650,ssc04662,ssc05169,ssc04725,ssc04370,ssc04915,ssc04960,ssc05214,ssc04664,ssc05200,ssc05146,ssc05218,ssc05220,ssc04910,ssc05100,ssc05223,ssc04932,ssc…	Influenza A,Measles,Toll-like receptor signaling pathway,Hepatitis C,Osteoclast differentiation,Chagas disease (American trypanosomiasis),Hepatitis B,TNF signaling pathway,Colorectal cancer,Type II diabetes mellitus,Toxoplasmosis,Acute myeloid leukemia,Jak-STAT signaling pathway,Chemokine signaling pathway,Pancreatic cancer,Viral carcinogenesis,Prolactin signaling pathway,T cell receptor signalin…
ENSSSCT00000010390	ENSSSCG00000009477	EDNRB	chr11:54691945-54718001	7.08669	5.46232	0.375598	0.0426	0.417589	endothelin receptor type B [Source:HGNC Symbol;Acc:HGNC:3180]	--	--	ssc04916,ssc04022,ssc04020,ssc04080	Melanogenesis,cGMP-PKG signaling pathway,Calcium signaling pathway,Neuroactive ligand-receptor interaction
ENSSSCT00000022723	ENSSSCG00000007448	-	chr17:54443914-54450548	8.25659	6.19492	0.414462	0.03565	0.380654	--	--	--	--	--
ENSSSCT00000022727	ENSSSCG00000022306	ROPN1L	GL895898.2:158025-172358	1.10924	2.01188	-0.858968	0.01395	0.225944	rhophilin associated tail protein 1-like [Source:HGNC Symbol;Acc:HGNC:24060]	--	--	--	--
ENSSSCT00000032298	ENSSSCG00000021725	PDS5B	chr11:8911210-8915009	7.54833	4.42097	0.771792	0.02225	0.295726	PDS5 cohesin associated factor B [Source:HGNC Symbol;Acc:HGNC:20418]	GO:0005622,GO:0044424,GO:0007049,GO:0022402,GO:0043229,GO:0007064,GO:0048519,GO:0043231,GO:0005515,GO:0048523,GO:0008285,GO:0008150,GO:0005634,GO:0044428,GO:0043226,GO:0042127,GO:0007062,GO:0009987,GO:0050789,GO:0043227,GO:0065007,GO:0043228,GO:0043232,GO:0050794,GO:0008283,GO:0070013,GO:0043233,GO:0031974,GO:0044464,GO:0003674,GO:0005623,GO:0005488,GO:0000070,GO:0044699,GO:0000819,GO:0031981,GO:…	intracellular,intracellular part,cell cycle,cell cycle process,intracellular organelle,mitotic sister chromatid cohesion,negative regulation of biological process,intracellular membrane-bounded organelle,protein binding,negative regulation of cellular process,negative regulation of cell proliferation,biological_process,nucleus,nuclear part,organelle,regulation of cell proliferation,sister chromat…	--	--
ENSSSCT00000032742	ENSSSCG00000012123	RAB9A	chrX:11281859-11303136	21.1681	28.2678	-0.417273	0.04455	0.425716	RAB9A, member RAS oncogene family [Source:HGNC Symbol;Acc:HGNC:9792]	--	--	ssc05162	Measles
ENSSSCT00000026111	ENSSSCG00000021865	INHBA	chr18:57997857-58009109	18.0418	13.7659	0.390247	0.01475	0.23392	inhibin beta A chain precursor [Source:RefSeq peptide;Acc:NP_999193]	--	--	ssc04350,ssc04550	TGF-beta signaling pathway,Signaling pathways regulating pluripotency of stem cells
ENSSSCT00000011231	ENSSSCG00000010261	PPA1	chr14:79052524-79087956	65.5011	52.6767	0.314356	0.0252	0.31467	pyrophosphatase (inorganic) 1 [Source:HGNC Symbol;Acc:HGNC:9226]	--	--	ssc00190	Oxidative phosphorylation
ENSSSCT00000005231	ENSSSCG00000004735	-	chr1:144360846-144382433	63.3348	49.0598	0.368458	0.0223	0.296117	--	--	--	--	--
ENSSSCT00000005744	ENSSSCG00000005211	CD274	chr1:242396224-242416185	25.692	16.001	0.683152	5e-05	0.00318682	CD274 molecule [Source:HGNC Symbol;Acc:HGNC:17635]	--	--	ssc04514	Cell adhesion molecules (CAMs)
ENSSSCT00000030951	ENSSSCG00000030454	-	chr13:106386537-106580728	87.6856	134.671	-0.619027	0.0114	0.199013	--	--	--	--	--
ENSSSCT00000028946	ENSSSCG00000022075	KCTD13	chr3:18629034-18633492	5.03296	3.62179	0.474705	0.0357	0.380972	potassium channel tetramerization domain containing 13 [Source:HGNC Symbol;Acc:HGNC:22234]	--	--	--	--
ENSSSCT00000028943	ENSSSCG00000029531	-	GL894448.1:1201-33120	8.46071	5.95992	0.505486	0.0054	0.124021	--	GO:0009615,GO:0051607,GO:0002252,GO:0051707,GO:0009607,GO:0002376,GO:0045087,GO:0051704,GO:0006955,GO:0006952,GO:0006950,GO:0009200,GO:0009262,GO:0009394,GO:0019692,GO:0002682,GO:0080134,GO:0031347,GO:0006203,GO:0008832,GO:0009151,GO:0009155,GO:0009204,GO:0009215,GO:0009217,GO:0009264,GO:0016793,GO:0046070,GO:0046386,GO:0043231,GO:0005634,GO:0043229,GO:0045088,GO:0048583,GO:0034655,GO:0009117,GO:…	response to virus,defense response to virus,immune effector process,response to other organism,response to biotic stimulus,immune system process,innate immune response,multi-organism process,immune response,defense response,response to stress,deoxyribonucleoside triphosphate metabolic process,deoxyribonucleotide metabolic process,2'-deoxyribonucleotide metabolic process,deoxyribose phosphate meta…	--	--
ENSSSCT00000028239	ENSSSCG00000026552	HIATL1	GL895478.1:12548-49081	64.0752	50.828	0.334143	0.0158	0.243953	hippocampus abundant transcript-like protein 1 [Source:RefSeq peptide;Acc:NP_001230329]	GO:0005575,GO:0051179,GO:0044765,GO:0006810,GO:0051234,GO:0016020,GO:0044763,GO:0009987,GO:0044699,GO:0003674,GO:0008150,GO:0044425,GO:0055085,GO:0016021,GO:0031224,GO:0005215,GO:0022891,GO:0022857,GO:0022892	cellular_component,localization,single-organism transport,transport,establishment of localization,membrane,single-organism cellular process,cellular process,single-organism process,molecular_function,biological_process,membrane part,transmembrane transport,integral to membrane,intrinsic to membrane,transporter activity,substrate-specific transmembrane transporter activity,transmembrane transporte…	--	--
ENSSSCT00000006294	ENSSSCG00000005724	SETX	chr1:306154771-306228908	57.4927	28.0944	1.0331	5e-05	0.00318682	senataxin [Source:HGNC Symbol;Acc:HGNC:445]	GO:0010033,GO:0006950,GO:0071310,GO:0070887,GO:0042802,GO:0006302,GO:0042221,GO:0006979,GO:0034599,GO:0071396,GO:0005622,GO:0006281,GO:0044424,GO:0001147,GO:0001160,GO:0006369,GO:0030846,GO:0031554,GO:0060566,GO:2000804,GO:2000806,GO:0005737,GO:0050896,GO:0033993,GO:0043243,GO:0043229,GO:0042981,GO:0043067,GO:0007623,GO:0048519,GO:1901363,GO:0006353,GO:0010941,GO:0043231,GO:0097159,GO:2000144,GO:…	response to organic substance,response to stress,cellular response to organic substance,cellular response to chemical stimulus,identical protein binding,double-strand break repair,response to chemical stimulus,response to oxidative stress,cellular response to oxidative stress,cellular response to lipid,intracellular,DNA repair,intracellular part,transcription termination site sequence-specific DN…	--	--
ENSSSCT00000002141	ENSSSCG00000001912	PML	chr7:64026830-64071479	15.0125	6.17148	1.28248	5e-05	0.00318682	promyelocytic leukemia [Source:HGNC Symbol;Acc:HGNC:9113]	GO:0009615,GO:0051607,GO:0002252,GO:0048525,GO:0051707,GO:0009607,GO:0043901,GO:0045087,GO:0051704,GO:0006952,GO:0034097,GO:0050792,GO:0043903,GO:0019058,GO:0043900,GO:0010033,GO:0006950,GO:0071310,GO:0071345,GO:0016032,GO:0044764,GO:0006955,GO:0044403,GO:0044419,GO:0002376,GO:0070887,GO:0050897,GO:0031347,GO:0080134,GO:0042802,GO:0006302,GO:0042221,GO:0006979,GO:0034599,GO:0050688,GO:0002697,GO:…	response to virus,defense response to virus,immune effector process,negative regulation of viral process,response to other organism,response to biotic stimulus,negative regulation of multi-organism process,innate immune response,multi-organism process,defense response,response to cytokine stimulus,regulation of viral process,regulation of symbiosis, encompassing mutualism through parasitism,viral…	ssc05164,ssc05168,ssc04120,ssc05221,ssc05200,ssc04144,ssc05202	Influenza A,Herpes simplex infection,Ubiquitin mediated proteolysis,Acute myeloid leukemia,Pathways in cancer,Endocytosis,Transcriptional misregulation in cancer
ENSSSCT00000024264	ENSSSCG00000030683	-	chr13:176513525-176539039	0.980667	1.63991	-0.741781	0.01095	0.193998	--	--	--	--	--
ENSSSCT00000016827	ENSSSCG00000027699	-	chr9:119027107-119035097	72.8842	87.9953	-0.271822	0.0494	0.448557	--	--	--	--	--
ENSSSCT00000029295	ENSSSCG00000024996	-	GL895197.2:605-3152	10.1299	6.83205	0.568231	0.027	0.327308	--	GO:0002376,GO:0006955,GO:0045087,GO:0034097,GO:0006952,GO:0010033,GO:0006950,GO:0002682,GO:0070887,GO:0071310,GO:0042221,GO:0050896,GO:0031347,GO:0048583,GO:0002684,GO:0045088,GO:0005737,GO:0080134,GO:0035924,GO:0048584,GO:0050776,GO:0051716,GO:0003824,GO:0071363,GO:0044424,GO:0007243,GO:0070848,GO:0002224,GO:0048518,GO:0002221,GO:0005515,GO:0002758,GO:0043412,GO:0002218,GO:0000165,GO:0005622,GO:…	immune system process,immune response,innate immune response,response to cytokine stimulus,defense response,response to organic substance,response to stress,regulation of immune system process,cellular response to chemical stimulus,cellular response to organic substance,response to chemical stimulus,response to stimulus,regulation of defense response,regulation of response to stimulus,positive re…	--	--
ENSSSCT00000002031	ENSSSCG00000001810	PDE8A	chr7:57896449-58089348	0.000247469	0.676974	-11.4176	0.04505	0.428177	phosphodiesterase 8A [Source:HGNC Symbol;Acc:HGNC:8793]	--	--	ssc00230,ssc05032	Purine metabolism,Morphine addiction
ENSSSCT00000011042	ENSSSCG00000010081	MAPK1	chr14:53590166-53614842	17.9381	62.9892	-1.81207	0.0022	0.0665275	mitogen-activated protein kinase 1 [Source:HGNC Symbol;Acc:HGNC:6871]	--	--	ssc05164,ssc05160,ssc04620,ssc05211,ssc04666,ssc05221,ssc05216,ssc04370,ssc04380,ssc04664,ssc05020,ssc05218,ssc04650,ssc05142,ssc05219,ssc05161,ssc04350,ssc04914,ssc04012,ssc05200,ssc05213,ssc05223,ssc05203,ssc04810,ssc04066,ssc04730,ssc04150,ssc05214,ssc04668,ssc05212,ssc05140,ssc04725,ssc04917,ssc04320,ssc05210,ssc04270,ssc05220,ssc04722,ssc04014,ssc04662,ssc04062,ssc05133,ssc05152,ssc04611,ssc…	Influenza A,Hepatitis C,Toll-like receptor signaling pathway,Renal cell carcinoma,Fc gamma R-mediated phagocytosis,Acute myeloid leukemia,Thyroid cancer,VEGF signaling pathway,Osteoclast differentiation,Fc epsilon RI signaling pathway,Prion diseases,Melanoma,Natural killer cell mediated cytotoxicity,Chagas disease (American trypanosomiasis),Bladder cancer,Hepatitis B,TGF-beta signaling pathway,Pr…
ENSSSCT00000011048	ENSSSCG00000010087	YDJC	chr14:53711335-53713076	0.669196	0.287687	1.21793	0.01685	0.253665	YdjC homolog (bacterial) [Source:HGNC Symbol;Acc:HGNC:27158]	--	--	--	--
ENSSSCT00000009409	ENSSSCG00000008598	RHOB	chr3:125745800-125748243	74.7949	59.5806	0.328097	0.0196	0.275925	ras homolog family member B [Source:HGNC Symbol;Acc:HGNC:668]	--	--	--	--
ENSSSCT00000012306	ENSSSCG00000011239	-	chr13:23827614-23843363	32.0447	15.2452	1.07173	5e-05	0.00318682	--	--	--	--	--
ENSSSCT00000011529	ENSSSCG00000010539	SLC25A28	chr14:120241401-120251848	37.6601	29.3518	0.359591	0.01315	0.217765	solute carrier family 25 (mitochondrial iron transporter), member 28 [Source:HGNC Symbol;Acc:HGNC:23472]	--	--	--	--
ENSSSCT00000001629	ENSSSCG00000025173	TAP2	chr7:29412164-29423473	4.19905	2.76362	0.603501	0.0027	0.0773057	-	--	--	ssc05168,ssc05340,ssc02010,ssc04612,ssc04145	Herpes simplex infection,Primary immunodeficiency,ABC transporters,Antigen processing and presentation,Phagosome
ENSSSCT00000019085	ENSSSCG00000017531	GHDC	chr12:24561329-24636573	1.60636	0.652381	1.30001	0.003	0.083117	-	--	--	--	--
ENSSSCT00000016190	ENSSSCG00000014838	PGM2L1	chr9:9531927-9564301	5.52063	7.52655	-0.447154	0.0151	0.237329	phosphoglucomutase 2-like 1 [Source:HGNC Symbol;Acc:HGNC:20898]	--	--	ssc00500	Starch and sucrose metabolism
ENSSSCT00000009612	ENSSSCG00000008786	-	chr8:31769681-31790270	4.44158	1.17219	1.92186	5e-05	0.00318682	--	GO:0044425,GO:0016020,GO:0005575,GO:0016021,GO:0031224	membrane part,membrane,cellular_component,integral to membrane,intrinsic to membrane	--	--
ENSSSCT00000028528	ENSSSCG00000027073	-	chr9:82405278-82429666	10.341	13.2109	-0.353343	0.0307	0.351603	--	GO:0042221,GO:0050896,GO:0004064,GO:0003824,GO:0016787,GO:0016788,GO:0009636,GO:0003674,GO:0005575,GO:0052689,GO:0005576,GO:0008152,GO:0008150	response to chemical stimulus,response to stimulus,arylesterase activity,catalytic activity,hydrolase activity,hydrolase activity, acting on ester bonds,response to toxic substance,molecular_function,cellular_component,carboxylic ester hydrolase activity,extracellular region,metabolic process,biological_process	ssc01100	Metabolic pathways
ENSSSCT00000005925	ENSSSCG00000005385	NR4A3	chr1:269817144-269852707	2.77404	1.93599	0.518915	0.0045	0.109311	nuclear receptor subfamily 4 group A member 3 [Source:HGNC Symbol;Acc:HGNC:7982]	--	--	ssc05202	Transcriptional misregulation in cancer
ENSSSCT00000000837	ENSSSCG00000000773	TUBAL3	chr5:72507679-72527225	2.29518	1.22186	0.909528	0.0016	0.0524968	tubulin alpha like 3 [Source:HGNC Symbol;Acc:HGNC:23534]	--	--	ssc04145,ssc04540	Phagosome,Gap junction
ENSSSCT00000000838	ENSSSCG00000000774	USP18	chr5:72536454-72596714	60.3374	20.7434	1.5404	5e-05	0.00318682	-	--	--	--	--
ENSSSCT00000032394	ENSSSCG00000023400	ZNF598	chr3:42208934-42218882	5.77715	4.4641	0.37199	0.02505	0.313639	zinc finger protein 598 [Source:HGNC Symbol;Acc:HGNC:28079]	--	--	--	--
ENSSSCT00000018964	ENSSSCG00000017420	CNP	chr12:21047672-21055845	14.7123	10.9121	0.431095	0.00415	0.103296	2',3'-cyclic nucleotide 3' phosphodiesterase [Source:HGNC Symbol;Acc:HGNC:2158]	--	--	--	--
ENSSSCT00000018960	ENSSSCG00000017416	DHX58	chr12:20937867-20946850	28.6146	8.50444	1.75046	5e-05	0.00318682	DEXH (Asp-Glu-X-His) box polypeptide 58 [Source:HGNC Symbol;Acc:HGNC:29517]	--	--	ssc04622	RIG-I-like receptor signaling pathway
ENSSSCT00000014494	ENSSSCG00000013270	CRY2	chr2:17893140-17916392	4.92148	3.75283	0.391113	0.049	0.446724	cryptochrome circadian clock 2 [Source:HGNC Symbol;Acc:HGNC:2385]	--	--	ssc04710	Circadian rhythm
ENSSSCT00000007422	ENSSSCG00000006776	MOV10	chr4:117822827-117848382	50.0891	34.4224	0.541148	5e-05	0.00318682	Mov10 RISC complex RNA helicase [Source:HGNC Symbol;Acc:HGNC:7200]	--	--	--	--
ENSSSCT00000016096	ENSSSCG00000014745	OR52J3	chr9:5768664-5769600	0.940532	0.211272	2.15438	0.0073	0.152042	olfactory receptor family 52 subfamily J member 3 [Source:HGNC Symbol;Acc:HGNC:14799]	--	--	ssc04740	Olfactory transduction
ENSSSCT00000008223	ENSSSCG00000007508	ZBP1	chr17:65136535-65146713	53.2489	13.5026	1.97952	5e-05	0.00318682	Z-DNA binding protein 1 [Source:HGNC Symbol;Acc:HGNC:16176]	--	--	ssc04623	Cytosolic DNA-sensing pathway
ENSSSCT00000017258	ENSSSCG00000015850	DUSP4	chr15:62906028-62923416	13.9814	9.85213	0.504998	0.00195	0.0608844	dual specificity phosphatase 4 [Source:HGNC Symbol;Acc:HGNC:3070]	--	--	ssc04010	MAPK signaling pathway
ENSSSCT00000023234	ENSSSCG00000030680	TCF7	chr2:142041627-142073804	0.845863	0.585228	0.531424	0.0412	0.410242	transcription factor 7 (T-cell specific, HMG-box) [Source:HGNC Symbol;Acc:HGNC:11639]	--	--	ssc04916,ssc05217,ssc04310,ssc05200,ssc05216,ssc05210,ssc05215,ssc04390,ssc05213,ssc05221,ssc05412,ssc04520	Melanogenesis,Basal cell carcinoma,Wnt signaling pathway,Pathways in cancer,Thyroid cancer,Colorectal cancer,Prostate cancer,Hippo signaling pathway,Endometrial cancer,Acute myeloid leukemia,Arrhythmogenic right ventricular cardiomyopathy (ARVC),Adherens junction
ENSSSCT00000023238	ENSSSCG00000023868	C3AR1	GL896371.1:25479-26910	24.268	19.3085	0.329823	0.04145	0.411476	complement component 3a receptor 1 [Source:HGNC Symbol;Acc:HGNC:1319]	GO:0002376,GO:0005622,GO:0044424,GO:0005829,GO:0002682,GO:0005737,GO:0004942,GO:0004943,GO:0010758,GO:0010759,GO:0071674,GO:0071675,GO:0044464,GO:0007204,GO:0005623,GO:0048522,GO:0048731,GO:0032879,GO:0006935,GO:0042330,GO:0048246,GO:0007275,GO:0051480,GO:0070887,GO:0045765,GO:1901342,GO:0048518,GO:0007610,GO:0071622,GO:0071624,GO:0090022,GO:0090023,GO:0065008,GO:0048856,GO:0001817,GO:0006874,GO:…	immune system process,intracellular,intracellular part,cytosol,regulation of immune system process,cytoplasm,anaphylatoxin receptor activity,C3a anaphylatoxin receptor activity,regulation of macrophage chemotaxis,positive regulation of macrophage chemotaxis,mononuclear cell migration,regulation of mononuclear cell migration,cell part,elevation of cytosolic calcium ion concentration,cell,positive …	ssc05150,ssc04610,ssc04080	Staphylococcus aureus infection,Complement and coagulation cascades,Neuroactive ligand-receptor interaction
ENSSSCT00000013962	ENSSSCG00000012771	-	chrX:142008588-142017917	5.81665	4.48281	0.375785	0.029	0.340639	--	--	--	--	--
ENSSSCT00000001518	ENSSSCG00000001394	MIC-2	chr7:27223009-27233917	8.86278	5.63525	0.65328	0.0027	0.0773057	-	--	--	--	--
ENSSSCT00000003917	ENSSSCG00000003526	C1QB	chr6:74625258-74629862	40.5502	30.4871	0.411514	0.0111	0.195723	-	--	--	ssc05150,ssc05020,ssc05142,ssc05322,ssc05133,ssc04610	Staphylococcus aureus infection,Prion diseases,Chagas disease (American trypanosomiasis),Systemic lupus erythematosus,Pertussis,Complement and coagulation cascades
ENSSSCT00000006637	ENSSSCG00000006048	DCAF13	chr4:36445459-36477121	50.1458	60.6309	-0.273923	0.046	0.432542	DDB1 and CUL4 associated factor 13 [Source:HGNC Symbol;Acc:HGNC:24535]	--	--	--	--
ENSSSCT00000022857	ENSSSCG00000023362	RHBDF2	chr12:4861483-4888174	24.3631	19.3945	0.329053	0.0201	0.279968	rhomboid 5 homolog 2 (Drosophila) [Source:HGNC Symbol;Acc:HGNC:20788]	--	--	--	--
ENSSSCT00000006989	ENSSSCG00000006378	SLAMF7	chr4:97461922-97479289	30.9146	19.612	0.65655	5e-05	0.00318682	SLAM family member 7 [Source:HGNC Symbol;Acc:HGNC:21394]	--	--	--	--
ENSSSCT00000007584	ENSSSCG00000006924	GBP1	chr4:139650957-139667272	42.5467	21.0739	1.01359	5e-05	0.00318682	-	--	--	--	--
ENSSSCT00000016934	ENSSSCG00000015544	ZNF648	chr9:135656819-135658438	3.93091	2.60626	0.59288	0.0117	0.202439	zinc finger protein 648 [Source:HGNC Symbol;Acc:HGNC:18190]	--	--	--	--
ENSSSCT00000026157	ENSSSCG00000022785	GSG1L	chr3:19136263-19387999	0.655937	0.221874	1.56382	0.0216	0.291885	GSG1-like [Source:HGNC Symbol;Acc:HGNC:28283]	--	--	--	--
ENSSSCT00000011440	ENSSSCG00000010454	IFIT5	chr14:110250794-110252240	87.9875	19.9051	2.14416	5e-05	0.00318682	interferon induced protein with tetratricopeptide repeats 5 [Source:HGNC Symbol;Acc:HGNC:13328]	GO:0009615,GO:0051607,GO:0002252,GO:0034340,GO:0051707,GO:0009607,GO:0071357,GO:0045087,GO:0051704,GO:0006952,GO:0034097,GO:0060337,GO:0010033,GO:0006950,GO:0071310,GO:0071345,GO:0006955,GO:0002376,GO:0070887,GO:0042221,GO:0019221,GO:0003723,GO:0005829,GO:0005622,GO:0044424,GO:0005737,GO:0050896,GO:0043229,GO:1901363,GO:0003727,GO:0032587,GO:0043231,GO:0097159,GO:0005515,GO:0008150,GO:0043226,GO:…	response to virus,defense response to virus,immune effector process,response to type I interferon,response to other organism,response to biotic stimulus,cellular response to type I interferon,innate immune response,multi-organism process,defense response,response to cytokine stimulus,type I interferon-mediated signaling pathway,response to organic substance,response to stress,cellular response to…	--	--
ENSSSCT00000001702	ENSSSCG00000001527	C6orf106	chr7:35362834-35410240	65.9641	52.12	0.339846	0.0424	0.416623	chromosome 6 open reading frame 106 [Source:HGNC Symbol;Acc:HGNC:21215]	--	--	--	--
ENSSSCT00000001707	ENSSSCG00000001532	UHRF1BP1	chr7:35474278-35538654	5.87812	4.73025	0.313439	0.04655	0.435466	UHRF1 binding protein 1 [Source:HGNC Symbol;Acc:HGNC:21216]	--	--	--	--
ENSSSCT00000024643	ENSSSCG00000024867	ISG20	chr1:212617011-212628410	6.9244	0.829123	3.06203	5e-05	0.00318682	interferon stimulated exonuclease gene 20kDa [Source:HGNC Symbol;Acc:HGNC:6130]	--	--	--	--
ENSSSCT00000024640	ENSSSCG00000027961	-	chr3:1268745-1282576	1.26512	0.729258	0.794768	0.0019	0.059695	--	--	--	--	--
ENSSSCT00000006861	ENSSSCG00000006262	RGS20	chr4:84214302-84280429	0.398748	0.72185	-0.856222	0.0156	0.242127	regulator of G-protein signaling 20 [Source:HGNC Symbol;Acc:HGNC:14600]	--	--	--	--
ENSSSCT00000019454	ENSSSCG00000017877	ANKFY1	chr12:52127977-52181196	23.3641	18.8634	0.308703	0.02865	0.338422	ankyrin repeat and FYVE domain containing 1 [Source:HGNC Symbol;Acc:HGNC:20763]	--	--	--	--
ENSSSCT00000011687	ENSSSCG00000010686	BAG3	chr14:141034617-141058597	3.14656	2.28359	0.462474	0.02675	0.325661	BCL2 associated athanogene 3 [Source:HGNC Symbol;Acc:HGNC:939]	--	--	--	--
ENSSSCT00000000156	ENSSSCG00000000148	-	chr5:9275334-9276287	25.6082	8.66322	1.56363	5e-05	0.00318682	--	--	--	--	--
ENSSSCT00000031341	ENSSSCG00000029736	-	chr9:41265798-41269250	8.82347	13.6201	-0.626317	0.0336	0.369284	--	--	--	--	--
ENSSSCT00000035457	ENSSSCG00000028027	GPR65	chr7:116433282-116443636	1.91987	1.21844	0.655976	0.01885	0.269794	-	--	--	--	--
ENSSSCT00000027489	ENSSSCG00000008647	CMPK2	chr3:137688567-137704282	22.9839	1.52424	3.91446	0.0401	0.404302	cytidine monophosphate (UMP-CMP) kinase 2, mitochondrial [Source:HGNC Symbol;Acc:HGNC:27015]	GO:0051707,GO:0009607,GO:0051704,GO:0010033,GO:0071310,GO:0070887,GO:0042221,GO:0071396,GO:0005829,GO:0005622,GO:0009132,GO:0044424,GO:0004798,GO:0006227,GO:0006233,GO:0006235,GO:0009138,GO:0009139,GO:0009186,GO:0009189,GO:0009196,GO:0009197,GO:0009202,GO:0009211,GO:0009212,GO:0033862,GO:0046072,GO:0046075,GO:0046077,GO:0005737,GO:0071222,GO:0050896,GO:0033993,GO:0009219,GO:0009221,GO:0009263,GO:…	response to other organism,response to biotic stimulus,multi-organism process,response to organic substance,cellular response to organic substance,cellular response to chemical stimulus,response to chemical stimulus,cellular response to lipid,cytosol,intracellular,nucleoside diphosphate metabolic process,intracellular part,thymidylate kinase activity,dUDP biosynthetic process,dTDP biosynthetic pr…	ssc00240,ssc01100	Pyrimidine metabolism,Metabolic pathways
ENSSSCT00000026682	ENSSSCG00000026429	ZFP14	chr6:41437342-41474278	1.71139	2.26977	-0.40738	0.022	0.293674	ZFP14 zinc finger protein [Source:HGNC Symbol;Acc:HGNC:29312]	--	--	--	--
ENSSSCT00000028688	ENSSSCG00000026931	SERTAD1	chr6:44447546-44448266	128.373	103.978	0.304061	0.03125	0.354901	SERTA domain containing 1 [Source:HGNC Symbol;Acc:HGNC:17932]	--	--	--	--
ENSSSCT00000005842	ENSSSCG00000005304	-	chr1:263396457-263403212	0.586322	0.331648	0.822038	0.02065	0.284335	--	GO:0005515,GO:0005488,GO:0003674	protein binding,binding,molecular_function	ssc03460	Fanconi anemia pathway
ENSSSCT00000027313	ENSSSCG00000011876	DTX3L	chr13:147573123-147581225	22.5226	8.28421	1.44294	5e-05	0.00318682	deltex 3 like, E3 ubiquitin ligase [Source:HGNC Symbol;Acc:HGNC:30323]	--	--	ssc04330	Notch signaling pathway
ENSSSCT00000026767	ENSSSCG00000024115	-	chr12:41461518-41507345	11.2864	3.26051	1.79142	5e-05	0.00318682	--	--	--	--	--
ENSSSCT00000007930	ENSSSCG00000007248	ASXL1	chr17:40908260-40984197	4.54135	3.67032	0.307213	0.04985	0.450472	additional sex combs like 1, transcriptional regulator [Source:HGNC Symbol;Acc:HGNC:18318]	--	--	--	--
ENSSSCT00000007114	ENSSSCG00000006495	SEMA4A	chr4:102610615-102625450	13.4998	8.3992	0.684615	0.0001	0.00583627	sema domain, immunoglobulin domain (Ig), transmembrane domain (TM) and short cytoplasmic domain, (semaphorin) 4A [Source:HGNC Symbol;Acc:HGNC:10729]	GO:0002252,GO:0002376,GO:0030097,GO:0048534,GO:0006955,GO:0002520,GO:0043367,GO:0035710,GO:0046632,GO:0030217,GO:0045063,GO:0046631,GO:0030098,GO:0042093,GO:0042088,GO:0002287,GO:0002292,GO:0002293,GO:0002294,GO:0002286,GO:0071526,GO:0042110,GO:0002521,GO:0002460,GO:0002250,GO:0048585,GO:0046649,GO:0030215,GO:0048843,GO:0048523,GO:0045596,GO:0002285,GO:0045321,GO:0045499,GO:0030517,GO:0048521,GO:…	immune effector process,immune system process,hemopoiesis,hematopoietic or lymphoid organ development,immune response,immune system development,CD4-positive, alpha-beta T cell differentiation,CD4-positive, alpha-beta T cell activation,alpha-beta T cell differentiation,T cell differentiation,T-helper 1 cell differentiation,alpha-beta T cell activation,lymphocyte differentiation,T-helper cell diffe…	ssc04360	Axon guidance
ENSSSCT00000032187	ENSSSCG00000027219	AKAP7	GL894048.1:9382-33099	14.6304	8.03431	0.864724	0.00025	0.0125444	A-kinase anchoring protein 7 [Source:HGNC Symbol;Acc:HGNC:377]	GO:0034237,GO:0005829,GO:0043231,GO:0005634,GO:0043229,GO:0051018,GO:0005515,GO:0005488,GO:0044444,GO:0044424,GO:0005737,GO:0043227,GO:0043226,GO:0005622,GO:0019901,GO:0019900,GO:0003674,GO:0019899,GO:0044464,GO:0005623,GO:0005575	protein kinase A regulatory subunit binding,cytosol,intracellular membrane-bounded organelle,nucleus,intracellular organelle,protein kinase A binding,protein binding,binding,cytoplasmic part,intracellular part,cytoplasm,membrane-bounded organelle,organelle,intracellular,protein kinase binding,kinase binding,molecular_function,enzyme binding,cell part,cell,cellular_component	--	--
ENSSSCT00000032181	ENSSSCG00000026832	CSF1	chr4:120592958-120605764	32.2896	25.2373	0.355513	0.0374	0.389827	macrophage colony-stimulating factor 1 precursor [Source:RefSeq peptide;Acc:NP_001231452]	--	--	ssc04060,ssc05323,ssc04668,ssc04640,ssc04380,ssc04014,ssc04015,ssc04151	Cytokine-cytokine receptor interaction,Rheumatoid arthritis,TNF signaling pathway,Hematopoietic cell lineage,Osteoclast differentiation,Ras signaling pathway,Rap1 signaling pathway,PI3K-Akt signaling pathway
ENSSSCT00000027408	ENSSSCG00000030262	GDPD1	chr12:36929185-37026257	19.664	24.6332	-0.325052	0.0252	0.31467	glycerophosphodiester phosphodiesterase domain containing 1 [Source:HGNC Symbol;Acc:HGNC:20883]	GO:0005575,GO:0071704,GO:0044238,GO:0008152,GO:0006629,GO:0008889,GO:0016788,GO:0003824,GO:0016020,GO:0042578,GO:0008081,GO:0016787,GO:0044710,GO:0003674,GO:0008150,GO:0044425,GO:0016021,GO:0031224	cellular_component,organic substance metabolic process,primary metabolic process,metabolic process,lipid metabolic process,glycerophosphodiester phosphodiesterase activity,hydrolase activity, acting on ester bonds,catalytic activity,membrane,phosphoric ester hydrolase activity,phosphoric diester hydrolase activity,hydrolase activity,single-organism metabolic process,molecular_function,biological_…	--	--
ENSSSCT00000016023	ENSSSCG00000014672	TRIM6	chr9:4689734-4720219	5.21434	3.11754	0.742078	0.0108	0.192276	-	--	--	--	--
ENSSSCT00000016021	ENSSSCG00000014670	TRIM5	chr9:4724245-4737190	74.1959	37.4875	0.984931	5e-05	0.00318682	-	--	--	--	--
ENSSSCT00000018515	ENSSSCG00000017003	KCNIP1	chr16:57544456-57558818	3.48016	2.48545	0.485649	0.0394	0.400637	Kv channel-interacting protein 1 [Source:RefSeq peptide;Acc:NP_001026947]	--	--	--	--
ENSSSCT00000001533	ENSSSCG00000001404	TNF	chr7:27549595-27552338	16.3908	10.1808	0.687041	5e-05	0.00318682	Tumor necrosis factor Tumor necrosis factor, membrane form Intracellular domain 1 Intracellular domain 2 C-domain 1 C-domain 2 Tumor necrosis factor, soluble form [Source:UniProtKB/Swiss-Prot;Acc:P23563]	--	--	ssc05133,ssc04620,ssc05134,ssc04621,ssc05164,ssc05168,ssc04064,ssc05140,ssc05152,ssc05161,ssc04380,ssc04622,ssc05160,ssc05142,ssc05323,ssc04210,ssc04640,ssc05144,ssc04668,ssc05321,ssc04060,ssc05145,ssc04612,ssc05205,ssc04660,ssc05166,ssc04932,ssc05143,ssc05332,ssc05014,ssc05010,ssc04940,ssc05322,ssc04350,ssc05414,ssc04650,ssc05410,ssc04664,ssc04010,ssc04920,ssc04150,ssc05330,ssc05146,ssc04930,ssc…	Pertussis,Toll-like receptor signaling pathway,Legionellosis,NOD-like receptor signaling pathway,Influenza A,Herpes simplex infection,NF-kappa B signaling pathway,Leishmaniasis,Tuberculosis,Hepatitis B,Osteoclast differentiation,RIG-I-like receptor signaling pathway,Hepatitis C,Chagas disease (American trypanosomiasis),Rheumatoid arthritis,Apoptosis,Hematopoietic cell lineage,Malaria,TNF signalin…
ENSSSCT00000012003	ENSSSCG00000010966	CCL19	chr10:36249786-36252381	1.29283	0.691607	0.90251	0.0495	0.448968	chemokine (C-C motif) ligand 19 [Source:HGNC Symbol;Acc:HGNC:10617]	--	--	ssc04060,ssc04062,ssc04064	Cytokine-cytokine receptor interaction,Chemokine signaling pathway,NF-kappa B signaling pathway
ENSSSCT00000030573	ENSSSCG00000021383	MB21D1	chr1:103535848-103557331	6.97794	3.78745	0.881576	5e-05	0.00318682	Mab-21 domain containing 1 [Source:HGNC Symbol;Acc:HGNC:21367]	--	--	ssc04623	Cytosolic DNA-sensing pathway
ENSSSCT00000031766	ENSSSCG00000029391	TMEM256-PLSCR3	chr12:54932089-54942548	1.62632	1.17073	0.474206	0.0302	0.348425	TMEM256-PLSCR3 readthrough (NMD candidate) [Source:HGNC Symbol;Acc:HGNC:49186]	--	--	--	--
ENSSSCT00000026252	ENSSSCG00000030118	SAP30	JH118983.1:4462-8631	17.9251	23.1584	-0.369551	0.0311	0.353977	Sin3A associated protein 30kDa [Source:HGNC Symbol;Acc:HGNC:10532]	GO:0044424,GO:0005622,GO:0043227,GO:0005515,GO:0043226,GO:0043231,GO:0044446,GO:0043229,GO:0044422,GO:0009058,GO:0071704,GO:0010467,GO:0044237,GO:1901576,GO:0070013,GO:0044249,GO:0043233,GO:0048519,GO:0010605,GO:0031974,GO:0005488,GO:0044428,GO:0032502,GO:0031981,GO:0044238,GO:0005575,GO:0048869,GO:0005634,GO:0030154,GO:0019222,GO:0007275,GO:0008152,GO:0009892,GO:0044767,GO:0010629,GO:0048731,GO:…	intracellular part,intracellular,membrane-bounded organelle,protein binding,organelle,intracellular membrane-bounded organelle,intracellular organelle part,intracellular organelle,organelle part,biosynthetic process,organic substance metabolic process,gene expression,cellular metabolic process,organic substance biosynthetic process,intracellular organelle lumen,cellular biosynthetic process,organ…	--	--
ENSSSCT00000008628	ENSSSCG00000007873	-	chr3:29026157-29061927	3.04746	2.31444	0.396946	0.0408	0.408125	--	--	--	--	--
ENSSSCT00000029072	ENSSSCG00000030242	RSRP1	GL894621.1:28008-30628	20.96	30.17	-0.525476	0.0067	0.143937	arginine/serine-rich protein 1 [Source:HGNC Symbol;Acc:HGNC:25234]	--	--	--	--
ENSSSCT00000005914	ENSSSCG00000005374	TRIM14	chr1:268088217-268114635	9.15116	6.34501	0.528333	0.00605	0.13428	tripartite motif containing 14 [Source:HGNC Symbol;Acc:HGNC:16283]	--	--	--	--
ENSSSCT00000027056	ENSSSCG00000027571	-	GL893394.1:5873-56173	1.926	3.16842	-0.718154	0.00865	0.168429	--	--	--	--	--
ENSSSCT00000024215	ENSSSCG00000029192	FBXW4	chr14:122628198-122634339	2.41347	0	inf	0.00145	0.048842	F-box and WD repeat domain containing 4 [Source:HGNC Symbol;Acc:HGNC:10847]	--	--	--	--
ENSSSCT00000009832	ENSSSCG00000008977	CXCL10	chr8:75809804-75991009	48.5897	2.96144	4.03628	5e-05	0.00318682	C-X-C motif chemokine 10 precursor [Source:RefSeq peptide;Acc:NP_001008691]	--	--	ssc05164,ssc04623,ssc04622,ssc04620,ssc04060,ssc04668,ssc04062	Influenza A,Cytosolic DNA-sensing pathway,RIG-I-like receptor signaling pathway,Toll-like receptor signaling pathway,Cytokine-cytokine receptor interaction,TNF signaling pathway,Chemokine signaling pathway
ENSSSCT00000035155	ENSSSCG00000017416	DHX58	chr12:20937867-20946850	11.7208	1.57127	2.89907	0.0187	0.268544	DEXH (Asp-Glu-X-His) box polypeptide 58 [Source:HGNC Symbol;Acc:HGNC:29517]	--	--	ssc04622	RIG-I-like receptor signaling pathway
ENSSSCT00000015445	ENSSSCG00000014141	RFESD	chr2:95686363-95696843	7.30529	10.3707	-0.505496	0.0411	0.409773	Rieske (Fe-S) domain containing [Source:HGNC Symbol;Acc:HGNC:29587]	--	--	--	--
ENSSSCT00000007787	ENSSSCG00000007115	THBD	chr17:34274131-34277761	11.1183	8.85401	0.328536	0.03455	0.374629	thrombomodulin [Source:HGNC Symbol;Acc:HGNC:11784]	--	--	ssc04610	Complement and coagulation cascades
ENSSSCT00000025469	ENSSSCG00000030404	PAPD5	GL893669.1:62457-79716	26.8297	19.2374	0.479915	0.0007	0.0281778	PAP associated domain containing 5 [Source:HGNC Symbol;Acc:HGNC:30758]	--	--	ssc03018	RNA degradation
ENSSSCT00000030051	ENSSSCG00000027813	-	chr3:42590746-42609843	1.58768	0.950664	0.739914	0.00255	0.0741254	--	--	--	--	--
ENSSSCT00000023448	ENSSSCG00000022486	CBLB	chr13:162677244-162892743	3.80691	3.03764	0.325672	0.0443	0.424668	Cbl proto-oncogene B, E3 ubiquitin protein ligase [Source:HGNC Symbol;Acc:HGNC:1542]	GO:0044424,GO:0005622,GO:0043231,GO:0043229,GO:0043227,GO:0005515,GO:0043226,GO:0005737,GO:0005634,GO:0005575,GO:0043170,GO:0044260,GO:0004842,GO:0044446,GO:0005488,GO:0019787,GO:0044422,GO:0071704,GO:0044238,GO:0016881,GO:0016567,GO:0008152,GO:0019538,GO:0065007,GO:0032446,GO:0044237,GO:0044428,GO:0005623,GO:0050789,GO:0044267,GO:0046914,GO:0070647,GO:0016874,GO:0016879,GO:0070013,GO:0043233,GO:…	intracellular part,intracellular,intracellular membrane-bounded organelle,intracellular organelle,membrane-bounded organelle,protein binding,organelle,cytoplasm,nucleus,cellular_component,macromolecule metabolic process,cellular macromolecule metabolic process,ubiquitin-protein ligase activity,intracellular organelle part,binding,small conjugating protein ligase activity,organelle part,organic su…	ssc04144,ssc05200,ssc05220,ssc05205,ssc04660,ssc04630,ssc05100,ssc04012,ssc04120,ssc04910	Endocytosis,Pathways in cancer,Chronic myeloid leukemia,Proteoglycans in cancer,T cell receptor signaling pathway,Jak-STAT signaling pathway,Bacterial invasion of epithelial cells,ErbB signaling pathway,Ubiquitin mediated proteolysis,Insulin signaling pathway
ENSSSCT00000023999	ENSSSCG00000030096	-	chr6:97090783-97095898	0.162037	0.595587	-1.87799	0.04345	0.42117	--	--	--	--	--
ENSSSCT00000019569	ENSSSCG00000017983	PER1	chr12:55836901-55851908	0.925115	0.423077	1.12871	0.0323	0.361329	period circadian clock 1 [Source:HGNC Symbol;Acc:HGNC:8845]	--	--	ssc05168,ssc04713,ssc04710	Herpes simplex infection,Circadian entrainment,Circadian rhythm
ENSSSCT00000033400	ENSSSCG00000012880	-	chr2:2815219-2874163	9.86182	7.51408	0.392258	0.03525	0.378442	--	--	--	ssc01212,ssc00071,ssc04152,ssc03320,ssc04920	Fatty acid metabolism,Fatty acid degradation,AMPK signaling pathway,PPAR signaling pathway,Adipocytokine signaling pathway
ENSSSCT00000024674	ENSSSCG00000027378	SH3PXD2B	chr16:56137620-56228713	4.97372	3.7659	0.40133	0.0093	0.175408	SH3 and PX domains 2B [Source:HGNC Symbol;Acc:HGNC:29242]	--	--	--	--
ENSSSCT00000024670	ENSSSCG00000020848	CMBL	GL896001.1:216-5125	7.72987	11.6771	-0.595163	0.0151	0.237329	carboxymethylenebutenolidase homolog (Pseudomonas) [Source:HGNC Symbol;Acc:HGNC:25090]	GO:0003824,GO:0016787,GO:0043227,GO:0003674,GO:0043226,GO:0005575,GO:0005576,GO:0071704,GO:0044238,GO:0008152,GO:0008150,GO:0019538,GO:0044421,GO:0043170,GO:0006508,GO:0008236,GO:0017171,GO:0043230,GO:0065010,GO:0070062,GO:0070011,GO:0008233,GO:0031988,GO:0031982	catalytic activity,hydrolase activity,membrane-bounded organelle,molecular_function,organelle,cellular_component,extracellular region,organic substance metabolic process,primary metabolic process,metabolic process,biological_process,protein metabolic process,extracellular region part,macromolecule metabolic process,proteolysis,serine-type peptidase activity,serine hydrolase activity,extracellular…	ssc01100	Metabolic pathways
ENSSSCT00000022632	ENSSSCG00000028108	ASAP3	GL893190.1:3720-15702	2.12327	1.21429	0.806176	0.00095	0.0355909	ArfGAP with SH3 domain, ankyrin repeat and PH domain 3 [Source:HGNC Symbol;Acc:HGNC:14987]	--	--	ssc04144,ssc04666	Endocytosis,Fc gamma R-mediated phagocytosis
ENSSSCT00000002626	ENSSSCG00000002362	-	chr7:103411780-103428283	5.54171	4.19966	0.400059	0.02895	0.340348	--	--	--	ssc02010,ssc04146	ABC transporters,Peroxisome
ENSSSCT00000013193	ENSSSCG00000012061	PIGP	chr13:210760406-210768763	18.487	24.6084	-0.412642	0.0386	0.396325	phosphatidylinositol glycan anchor biosynthesis class P [Source:HGNC Symbol;Acc:HGNC:3046]	--	--	ssc00563,ssc01100	Glycosylphosphatidylinositol(GPI)-anchor biosynthesis,Metabolic pathways
ENSSSCT00000027263	ENSSSCG00000022916	EVL	GL894354.1:8416-19888	3.92687	1.77212	1.1479	0.002	0.0620239	Enah/Vasp-like [Source:HGNC Symbol;Acc:HGNC:20234]	GO:0005515,GO:0005622,GO:0048523,GO:0044424,GO:0048519,GO:0005737,GO:0005488,GO:0051129,GO:0051130,GO:0044464,GO:0005623,GO:0048522,GO:0031252,GO:0032879,GO:1900028,GO:0031334,GO:0005522,GO:0033043,GO:0031345,GO:0048518,GO:0030838,GO:0010638,GO:0043254,GO:0051128,GO:0001667,GO:0032273,GO:0010632,GO:0065008,GO:0003674,GO:0030027,GO:1900027,GO:0051258,GO:0044699,GO:0006996,GO:0032535,GO:0040013,GO:…	protein binding,intracellular,negative regulation of cellular process,intracellular part,negative regulation of biological process,cytoplasm,binding,negative regulation of cellular component organization,positive regulation of cellular component organization,cell part,cell,positive regulation of cellular process,cell leading edge,regulation of localization,negative regulation of ruffle assembly,p…	--	--
ENSSSCT00000017206	ENSSSCG00000015801	TLR3	chr15:53840782-53852536	1.20932	0.354517	1.77026	0.0286	0.338088	toll-like receptor 3 [Source:HGNC Symbol;Acc:HGNC:11849]	--	--	ssc05164,ssc05168,ssc04620,ssc05161,ssc05160	Influenza A,Herpes simplex infection,Toll-like receptor signaling pathway,Hepatitis B,Hepatitis C
ENSSSCT00000015113	ENSSSCG00000013835	CASP14	chr2:62082530-62085517	7.22592	4.86581	0.5705	0.0308	0.352261	caspase 14 [Source:HGNC Symbol;Acc:HGNC:1502]	GO:0006950,GO:0050896,GO:0005737,GO:0042981,GO:0051716,GO:0043067,GO:0003824,GO:0016787,GO:0043281,GO:0010941,GO:0044424,GO:2000116,GO:0006919,GO:0006974,GO:0008630,GO:0033554,GO:0006915,GO:0097202,GO:0005515,GO:0097191,GO:0012501,GO:0005634,GO:0043280,GO:0097153,GO:0097199,GO:0005622,GO:0043227,GO:2001056,GO:0003674,GO:0008219,GO:0016265,GO:0010950,GO:0043231,GO:0097190,GO:0052548,GO:0043229,GO:…	response to stress,response to stimulus,cytoplasm,regulation of apoptotic process,cellular response to stimulus,regulation of programmed cell death,catalytic activity,hydrolase activity,regulation of cysteine-type endopeptidase activity involved in apoptotic process,regulation of cell death,intracellular part,regulation of cysteine-type endopeptidase activity,activation of cysteine-type endopepti…	--	--
ENSSSCT00000029270	ENSSSCG00000027660	IFI44L	chr6:124816722-124835978	123.095	45.3356	1.44106	5e-05	0.00318682	interferon induced protein 44 like [Source:HGNC Symbol;Acc:HGNC:17817]	--	--	--	--
ENSSSCT00000008714	ENSSSCG00000007951	CREBBP	chr3:39539011-39798202	4.6008	3.53246	0.381212	0.0328	0.364383	CREB binding protein [Source:HGNC Symbol;Acc:HGNC:2348]	--	--	--	--
ENSSSCT00000007259	ENSSSCG00000006625	RFX5	chr4:107103118-107109545	7.64864	5.99311	0.351899	0.02665	0.324932	regulatory factor X5 [Source:HGNC Symbol;Acc:HGNC:9986]	--	--	ssc05152,ssc04612,ssc05340	Tuberculosis,Antigen processing and presentation,Primary immunodeficiency
ENSSSCT00000007531	ENSSSCG00000006877	-	chr4:130763758-130857116	0.264127	0.577147	-1.12771	0.01715	0.256208	--	--	--	--	--
ENSSSCT00000034848	ENSSSCG00000008977	CXCL10	chr8:75809804-75991009	25.1496	1.03352	4.6049	5e-05	0.00318682	C-X-C motif chemokine 10 precursor [Source:RefSeq peptide;Acc:NP_001008691]	--	--	ssc05164,ssc04623,ssc04622,ssc04620,ssc04060,ssc04668,ssc04062	Influenza A,Cytosolic DNA-sensing pathway,RIG-I-like receptor signaling pathway,Toll-like receptor signaling pathway,Cytokine-cytokine receptor interaction,TNF signaling pathway,Chemokine signaling pathway
ENSSSCT00000026478	ENSSSCG00000021062	-	chr13:133648768-133649626	0	1.22131	#NAME?	0.02285	0.300182	--	--	--	ssc04070,ssc00564,ssc00561,ssc01100	Phosphatidylinositol signaling system,Glycerophospholipid metabolism,Glycerolipid metabolism,Metabolic pathways
ENSSSCT00000011437	ENSSSCG00000010451	IFIT2	chr14:110179711-110190465	20.7786	3.36883	2.62478	0.00015	0.0082355	interferon induced protein with tetratricopeptide repeats 2 [Source:HGNC Symbol;Acc:HGNC:5409]	GO:0009615,GO:0051607,GO:0002252,GO:0034340,GO:0051707,GO:0009607,GO:0071357,GO:0045087,GO:0051704,GO:0035455,GO:0006952,GO:0034097,GO:0060337,GO:0035457,GO:0010033,GO:0006950,GO:0071310,GO:0071345,GO:0006955,GO:0002376,GO:0070887,GO:0042802,GO:0042221,GO:0019221,GO:0003723,GO:0005829,GO:0005622,GO:0044424,GO:0032091,GO:0005737,GO:0044092,GO:0050896,GO:0043229,GO:0042981,GO:0043067,GO:0051100,GO:…	response to virus,defense response to virus,immune effector process,response to type I interferon,response to other organism,response to biotic stimulus,cellular response to type I interferon,innate immune response,multi-organism process,response to interferon-alpha,defense response,response to cytokine stimulus,type I interferon-mediated signaling pathway,cellular response to interferon-alpha,re…	--	--
ENSSSCT00000011438	ENSSSCG00000010452	IFIT3	chr14:110209343-110210870	277.112	80.134	1.78999	5e-05	0.00318682	interferon induced protein with tetratricopeptide repeats 3 [Source:HGNC Symbol;Acc:HGNC:5411]	GO:0009615,GO:0051607,GO:0002252,GO:0034340,GO:0051707,GO:0009607,GO:0071357,GO:0045087,GO:0051704,GO:0035455,GO:0006952,GO:0034097,GO:0060337,GO:0035457,GO:0010033,GO:0006950,GO:0071310,GO:0071345,GO:0006955,GO:0002376,GO:0070887,GO:0042802,GO:0042221,GO:0019221,GO:0003723,GO:0005829,GO:0005622,GO:0044424,GO:0005737,GO:0050896,GO:0043229,GO:0042981,GO:0043067,GO:0048519,GO:1901363,GO:0010941,GO:…	response to virus,defense response to virus,immune effector process,response to type I interferon,response to other organism,response to biotic stimulus,cellular response to type I interferon,innate immune response,multi-organism process,response to interferon-alpha,defense response,response to cytokine stimulus,type I interferon-mediated signaling pathway,cellular response to interferon-alpha,re…	--	--
ENSSSCT00000010749	ENSSSCG00000009806	SETD1B	chr14:32669799-32690468	1.13924	0.794366	0.520191	0.0173	0.257474	SET domain containing 1B [Source:HGNC Symbol;Acc:HGNC:29187]	GO:0051568,GO:0034968,GO:0048188,GO:0044428,GO:0016571,GO:0043231,GO:0005634,GO:0043229,GO:0042800,GO:0006479,GO:0008213,GO:0032259,GO:0031981,GO:0005654,GO:0035097,GO:0005515,GO:0070013,GO:0043233,GO:0005488,GO:0031974,GO:0044424,GO:0005737,GO:0034708,GO:0003824,GO:0016278,GO:0016279,GO:0018024,GO:0043414,GO:0043227,GO:0043226,GO:0005622,GO:0042054,GO:0008168,GO:0016741,GO:0044451,GO:0003676,GO:…	histone H3-K4 methylation,histone lysine methylation,Set1C/COMPASS complex,nuclear part,histone methylation,intracellular membrane-bounded organelle,nucleus,intracellular organelle,histone methyltransferase activity (H3-K4 specific),protein methylation,protein alkylation,methylation,nuclear lumen,nucleoplasm,histone methyltransferase complex,protein binding,intracellular organelle lumen,organelle…	ssc00310	Lysine degradation
ENSSSCT00000017912	ENSSSCG00000016449	GIMAP2	chr18:6731368-6733669	13.7743	18.5295	-0.42785	0.0093	0.175408	GTPase, IMAP family member 2 [Source:HGNC Symbol;Acc:HGNC:21789]	GO:0005737,GO:0044424,GO:0005622,GO:0044444,GO:0097159,GO:1901363,GO:0005488,GO:0005575,GO:0000166,GO:1901265,GO:0036094,GO:0005811,GO:0005623,GO:0044464,GO:0016020,GO:0035639,GO:0001883,GO:0032550,GO:0001882,GO:0032549,GO:0003674,GO:0032555,GO:0017076,GO:0032553,GO:0043168,GO:0043167,GO:0005525,GO:0019001,GO:0032561,GO:0044425,GO:0016021,GO:0031224	cytoplasm,intracellular part,intracellular,cytoplasmic part,organic cyclic compound binding,heterocyclic compound binding,binding,cellular_component,nucleotide binding,nucleoside phosphate binding,small molecule binding,lipid particle,cell,cell part,membrane,purine ribonucleoside triphosphate binding,purine nucleoside binding,purine ribonucleoside binding,nucleoside binding,ribonucleoside binding…	--	--
ENSSSCT00000026826	ENSSSCG00000027111	-	GL894566.1:31517-35823	0	2.77953	#NAME?	5e-05	0.00318682	--	--	--	--	--
ENSSSCT00000027183	ENSSSCG00000026100	-	chr3:91877090-91892620	2.20616	3.61876	-0.713958	0.03785	0.392377	--	--	--	ssc00620	Pyruvate metabolism
ENSSSCT00000017707	ENSSSCG00000016262	SP140	chr15:144854820-144973706	54.7871	39.8506	0.459234	0.0011	0.0397093	SP140 nuclear body protein [Source:HGNC Symbol;Acc:HGNC:17133]	--	--	--	--
ENSSSCT00000010954	ENSSSCG00000009997	OSM	chr14:50281700-50290120	5.27407	3.4468	0.613659	0.02265	0.298862	oncostatin M [Source:HGNC Symbol;Acc:HGNC:8506]	GO:0002376,GO:0010033,GO:0071310,GO:0065008,GO:0070887,GO:0006955,GO:0034097,GO:0048518,GO:2001235,GO:0006950,GO:0007610,GO:0010468,GO:0097190,GO:0005622,GO:0071345,GO:0048522,GO:0010467,GO:0019221,GO:0012501,GO:0051649,GO:0008219,GO:0016265,GO:0005515,GO:0006915,GO:0050730,GO:0050731,GO:0007049,GO:2000112,GO:0046903,GO:0032879,GO:0051641,GO:0032940,GO:0010556,GO:0060255,GO:0009058,GO:1901576,GO:…	immune system process,response to organic substance,cellular response to organic substance,regulation of biological quality,cellular response to chemical stimulus,immune response,response to cytokine stimulus,positive regulation of biological process,positive regulation of apoptotic signaling pathway,response to stress,behavior,regulation of gene expression,apoptotic signaling pathway,intracellul…	ssc04060,ssc04630,ssc04151	Cytokine-cytokine receptor interaction,Jak-STAT signaling pathway,PI3K-Akt signaling pathway
ENSSSCT00000010165	ENSSSCG00000009281	-	chr11:1619168-1649277	0.611944	1.1315	-0.886765	0.0475	0.43997	--	--	--	ssc05412,ssc05416,ssc05410,ssc05414	Arrhythmogenic right ventricular cardiomyopathy (ARVC),Viral myocarditis,Hypertrophic cardiomyopathy (HCM),Dilated cardiomyopathy
ENSSSCT00000009461	ENSSSCG00000008648	RSAD2	chr3:137667911-137683557	300.232	29.5063	3.34699	5e-05	0.00318682	radical S-adenosyl methionine domain containing 2 [Source:HGNC Symbol;Acc:HGNC:30908]	GO:0009615,GO:0051607,GO:0002252,GO:0048525,GO:0051707,GO:0009607,GO:0045071,GO:0043901,GO:0045087,GO:0051704,GO:0006952,GO:0045069,GO:0050792,GO:0019079,GO:0043903,GO:0019058,GO:0043900,GO:0006950,GO:0016032,GO:0044764,GO:0006955,GO:0044403,GO:0044419,GO:0002376,GO:0031347,GO:0080134,GO:0002697,GO:0031967,GO:0031975,GO:0005622,GO:0001817,GO:0050709,GO:0002682,GO:0002224,GO:0044424,GO:0034154,GO:…	response to virus,defense response to virus,immune effector process,negative regulation of viral process,response to other organism,response to biotic stimulus,negative regulation of viral genome replication,negative regulation of multi-organism process,innate immune response,multi-organism process,defense response,regulation of viral genome replication,regulation of viral process,viral genome re…	ssc05164	Influenza A
ENSSSCT00000033970	ENSSSCG00000030900	LDLR	chr2:70193417-70206818	20.1007	15.1597	0.407004	0.02525	0.31505	low-density lipoprotein receptor precursor [Source:RefSeq peptide;Acc:NP_001193283]	--	--	ssc05160,ssc04144,ssc05145,ssc04976,ssc04913	Hepatitis C,Endocytosis,Toxoplasmosis,Bile secretion,Ovarian steroidogenesis
ENSSSCT00000036320	ENSSSCG00000011393	UBA7	chr13:35509776-35520887	21.5574	10.0765	1.09719	0.041	0.409216	ubiquitin-like modifier activating enzyme 7 [Source:HGNC Symbol;Acc:HGNC:12471]	--	--	ssc04120,ssc05012	Ubiquitin mediated proteolysis,Parkinson's disease
ENSSSCT00000036326	ENSSSCG00000030798	FUS	chr3:17545636-17557499	17.3442	13.7346	0.336635	0.0387	0.39689	FUS RNA binding protein [Source:HGNC Symbol;Acc:HGNC:4010]	--	--	--	--
ENSSSCT00000013505	ENSSSCG00000012350	MAGEH1	chrX:54057687-54059104	0.63497	1.03319	-0.702341	0.04415	0.424537	MAGE family member H1 [Source:HGNC Symbol;Acc:HGNC:24092]	GO:0005515,GO:0005488,GO:0005575,GO:0016020,GO:0003674,GO:0044425,GO:0016021,GO:0031224	protein binding,binding,cellular_component,membrane,molecular_function,membrane part,integral to membrane,intrinsic to membrane	--	--
ENSSSCT00000000669	ENSSSCG00000000623	BCL2L14	chr5:63690798-63713753	8.64178	4.67737	0.885631	0.0001	0.00583627	BCL2-like 14 (apoptosis facilitator) [Source:HGNC Symbol;Acc:HGNC:16657]	GO:0005515,GO:0005622,GO:0043226,GO:0044424,GO:0005829,GO:0005737,GO:0043229,GO:0005488,GO:2001238,GO:0044464,GO:0005623,GO:0048522,GO:0008219,GO:0016265,GO:0006915,GO:0012501,GO:0010941,GO:0048518,GO:0019899,GO:0042981,GO:0043067,GO:2001235,GO:0003674,GO:0044444,GO:0044699,GO:2001236,GO:0097190,GO:0005575,GO:0050896,GO:0008150,GO:0009967,GO:0048584,GO:0097191,GO:0023056,GO:0010647,GO:0048583,GO:…	protein binding,intracellular,organelle,intracellular part,cytosol,cytoplasm,intracellular organelle,binding,positive regulation of extrinsic apoptotic signaling pathway,cell part,cell,positive regulation of cellular process,cell death,death,apoptotic process,programmed cell death,regulation of cell death,positive regulation of biological process,enzyme binding,regulation of apoptotic process,reg…	--	--
ENSSSCT00000003482	ENSSSCG00000003140	FGF21	chr6:49830007-49831887	0.608938	0.187205	1.70168	0.03855	0.396091	fibroblast growth factor 21 [Source:HGNC Symbol;Acc:HGNC:3678]	--	--	ssc05200,ssc04014,ssc04810,ssc04015,ssc05218,ssc04151,ssc04010	Pathways in cancer,Ras signaling pathway,Regulation of actin cytoskeleton,Rap1 signaling pathway,Melanoma,PI3K-Akt signaling pathway,MAPK signaling pathway
ENSSSCT00000006506	ENSSSCG00000005926	PARP10	chr4:790064-797030	17.2246	13.9467	0.304548	0.03525	0.378442	poly(ADP-ribose) polymerase family member 10 [Source:HGNC Symbol;Acc:HGNC:25895]	--	--	--	--
ENSSSCT00000007675	ENSSSCG00000007007	IDO1	chr17:10806298-10928870	137.321	107.084	0.358808	0.02545	0.316458	indoleamine 2,3-dioxygenase 1 [Source:HGNC Symbol;Acc:HGNC:6059]	--	--	ssc05143,ssc00380,ssc01100	African trypanosomiasis,Tryptophan metabolism,Metabolic pathways
ENSSSCT00000017966	ENSSSCG00000016502	-	chr18:10181400-10223526	39.7424	18.9994	1.06473	5e-05	0.00318682	--	--	--	--	--
ENSSSCT00000001144	ENSSSCG00000001050	EDN1	chr7:9152652-9159251	22.1888	16.6965	0.410284	0.00725	0.151384	endothelin 1 [Source:HGNC Symbol;Acc:HGNC:3176]	GO:0005829,GO:0005737,GO:0006950,GO:0044424,GO:0005622,GO:0005515,GO:0048514,GO:0080134,GO:0044283,GO:0044711,GO:0051216,GO:0048646,GO:0003300,GO:0016053,GO:0046394,GO:0032787,GO:0006928,GO:0009058,GO:0022603,GO:0071704,GO:0001516,GO:0006692,GO:0006693,GO:0046457,GO:0010467,GO:0044444,GO:0051130,GO:0044237,GO:0032268,GO:0001944,GO:1901576,GO:0051641,GO:0001525,GO:0044249,GO:0010869,GO:0032800,GO:…	cytosol,cytoplasm,response to stress,intracellular part,intracellular,protein binding,blood vessel morphogenesis,regulation of response to stress,small molecule biosynthetic process,single-organism biosynthetic process,cartilage development,anatomical structure formation involved in morphogenesis,cardiac muscle hypertrophy,organic acid biosynthetic process,carboxylic acid biosynthetic process,mon…	ssc04916,ssc04668,ssc04066	Melanogenesis,TNF signaling pathway,HIF-1 signaling pathway
ENSSSCT00000030977	ENSSSCG00000026443	-	GL893808.2:28659-54660	1.14448	0.727972	0.652743	0.03265	0.363567	--	GO:0006796,GO:0006793,GO:0016307,GO:0008150,GO:0046834,GO:0046854,GO:0016310,GO:0009987,GO:0008152,GO:0016772,GO:0019637,GO:0003674,GO:0016301,GO:0003824,GO:0046488,GO:0044237,GO:0030258,GO:0006650,GO:0044238,GO:0006644,GO:0046486,GO:0071704,GO:0044710,GO:0016740,GO:0006629,GO:0016773,GO:0044255	phosphate-containing compound metabolic process,phosphorus metabolic process,phosphatidylinositol phosphate kinase activity,biological_process,lipid phosphorylation,phosphatidylinositol phosphorylation,phosphorylation,cellular process,metabolic process,transferase activity, transferring phosphorus-containing groups,organophosphate metabolic process,molecular_function,kinase activity,catalytic act…	ssc04666,ssc04070,ssc04810,ssc04144,ssc00562,ssc01100	Fc gamma R-mediated phagocytosis,Phosphatidylinositol signaling system,Regulation of actin cytoskeleton,Endocytosis,Inositol phosphate metabolism,Metabolic pathways
ENSSSCT00000012469	ENSSSCG00000011391	CDHR4	chr13:35501373-35508389	0.860634	0.490591	0.81088	0.01175	0.202932	cadherin related family member 4 [Source:HGNC Symbol;Acc:HGNC:34527]	--	--	--	--
ENSSSCT00000031166	ENSSSCG00000028912	-	chr13:23924270-23947082	18.8937	8.99816	1.0702	5e-05	0.00318682	--	--	--	--	--
ENSSSCT00000031162	ENSSSCG00000024095	-	chr8:146540274-146542690	4.90911	1.46878	1.74084	5e-05	0.00318682	--	--	--	--	--
ENSSSCT00000030341	ENSSSCG00000024398	-	GL896454.1:9107-13337	1.36202	0.722627	0.914426	0.0168	0.253166	--	GO:0005829,GO:0005737,GO:0003723,GO:0044424,GO:0005622,GO:1901363,GO:0003676,GO:0003674,GO:0097159,GO:0043229,GO:0043226,GO:0005575,GO:0044444,GO:0044267,GO:0071704,GO:0044238,GO:0008152,GO:0008150,GO:0044446,GO:0005623,GO:0019538,GO:0044422,GO:0009987,GO:0044237,GO:0022625,GO:0005488,GO:0015934,GO:0044260,GO:0044464,GO:0043170,GO:0022626,GO:0003729,GO:0044391,GO:0003735,GO:0030529,GO:0006412,GO:…	cytosol,cytoplasm,RNA binding,intracellular part,intracellular,heterocyclic compound binding,nucleic acid binding,molecular_function,organic cyclic compound binding,intracellular organelle,organelle,cellular_component,cytoplasmic part,cellular protein metabolic process,organic substance metabolic process,primary metabolic process,metabolic process,biological_process,intracellular organelle part,c…	ssc03010	Ribosome
ENSSSCT00000035488	ENSSSCG00000012076	MX2	chr13:215028063-215059085	146.234	36.1282	2.01708	5e-05	0.00318682	MX dynamin-like GTPase 2 [Source:HGNC Symbol;Acc:HGNC:7533]	GO:0009615,GO:0051607,GO:0002252,GO:0051707,GO:0009607,GO:0051704,GO:0035455,GO:0006952,GO:0034097,GO:0010033,GO:0006950,GO:0002376,GO:0042221,GO:0005635,GO:0005525,GO:0031967,GO:0031975,GO:0019001,GO:0032561,GO:0005622,GO:0044424,GO:0007049,GO:0050896,GO:0043229,GO:1901363,GO:0043231,GO:0097159,GO:0006913,GO:0051169,GO:0005515,GO:0036094,GO:0008150,GO:0005634,GO:0044428,GO:0043226,GO:0012505,GO:…	response to virus,defense response to virus,immune effector process,response to other organism,response to biotic stimulus,multi-organism process,response to interferon-alpha,defense response,response to cytokine stimulus,response to organic substance,response to stress,immune system process,response to chemical stimulus,nuclear envelope,GTP binding,organelle envelope,envelope,guanyl nucleotide b…	--	--
ENSSSCT00000022357	ENSSSCG00000026872	TNFSF13	GL896258.1:1741-3865	39.6986	52.8509	-0.41284	0.00985	0.181329	a proliferation-inducing ligand [Source:RefSeq peptide;Acc:NP_001106160]	GO:0002252,GO:0002376,GO:0006955,GO:0002682,GO:0050896,GO:0002697,GO:0002520,GO:0005164,GO:0002819,GO:0005125,GO:0048583,GO:0002684,GO:0005737,GO:0002250,GO:0005126,GO:0032813,GO:0048731,GO:0050776,GO:0002366,GO:0007275,GO:0002263,GO:0002460,GO:0002822,GO:0002706,GO:0005615,GO:0045321,GO:0051239,GO:0044424,GO:0002700,GO:0048298,GO:0048856,GO:0050793,GO:0002703,GO:0032502,GO:0048518,GO:0005515,GO:…	immune effector process,immune system process,immune response,regulation of immune system process,response to stimulus,regulation of immune effector process,immune system development,tumor necrosis factor receptor binding,regulation of adaptive immune response,cytokine activity,regulation of response to stimulus,positive regulation of immune system process,cytoplasm,adaptive immune response,cytok…	ssc05323,ssc04060,ssc04672	Rheumatoid arthritis,Cytokine-cytokine receptor interaction,Intestinal immune network for IgA production
ENSSSCT00000004260	ENSSSCG00000003848	LRP8	chr6:146567980-146649171	5.32076	4.24078	0.327302	0.0353	0.378722	LDL receptor related protein 8 [Source:HGNC Symbol;Acc:HGNC:6700]	--	--	--	--
ENSSSCT00000011504	ENSSSCG00000010514	RRP12	chr14:118240907-118268516	6.11303	4.59579	0.411576	0.01135	0.198476	ribosomal RNA processing 12 homolog [Source:HGNC Symbol;Acc:HGNC:29100]	--	--	--	--
ENSSSCT00000002595	ENSSSCG00000002332	SIPA1L1	chr7:101270246-101416122	4.9999	3.66635	0.447555	0.0039	0.0988008	signal-induced proliferation-associated 1 like 1 [Source:HGNC Symbol;Acc:HGNC:20284]	--	--	ssc04015	Rap1 signaling pathway
ENSSSCT00000030523	ENSSSCG00000023379	UBE2L6	chr2:12987516-13002993	137.27	56.9284	1.2698	5e-05	0.00318682	ubiquitin conjugating enzyme E2L 6 [Source:HGNC Symbol;Acc:HGNC:12490]	--	--	ssc04120,ssc05012	Ubiquitin mediated proteolysis,Parkinson's disease
ENSSSCT00000030602	ENSSSCG00000030108	-	chr17:57190144-57221225	20.546	6.26943	1.71245	5e-05	0.00318682	--	--	--	--	--
ENSSSCT00000022785	ENSSSCG00000020666	EHD4	chr1:144621555-144641473	49.3589	36.0416	0.45365	0.0013	0.0450029	EH domain containing 4 [Source:HGNC Symbol;Acc:HGNC:3245]	--	--	ssc04144	Endocytosis
ENSSSCT00000011299	ENSSSCG00000010322	ZNF503	chr14:84022361-84025215	1.67131	1.1424	0.548905	0.04875	0.445664	zinc finger protein 503 [Source:HGNC Symbol;Acc:HGNC:23589]	--	--	--	--
ENSSSCT00000028880	ENSSSCG00000027124	-	chr14:44740622-44742674	0.467755	0.258765	0.85411	0.0353	0.378722	--	--	--	--	--
ENSSSCT00000012988	ENSSSCG00000011874	PARP14	chr13:147430045-147483562	19.8142	7.9609	1.31553	5e-05	0.00318682	poly(ADP-ribose) polymerase family member 14 [Source:HGNC Symbol;Acc:HGNC:29232]	--	--	--	--
ENSSSCT00000006309	ENSSSCG00000005738	RALGDS	chr1:306700485-306714090	16.3858	12.3128	0.412292	0.00565	0.127996	ral guanine nucleotide dissociation stimulator [Source:HGNC Symbol;Acc:HGNC:9842]	GO:0005829,GO:0005737,GO:0044424,GO:0005622,GO:0043227,GO:0005515,GO:0043226,GO:0043231,GO:0043229,GO:0071704,GO:0044444,GO:0044237,GO:0005488,GO:0044238,GO:0005575,GO:0005634,GO:0019222,GO:0008152,GO:0050790,GO:0044093,GO:1901360,GO:0044281,GO:0065009,GO:0051174,GO:0031323,GO:0043085,GO:0044248,GO:0006807,GO:0034641,GO:0046483,GO:0035556,GO:0019220,GO:0006725,GO:0006139,GO:0009117,GO:0006753,GO:…	cytosol,cytoplasm,intracellular part,intracellular,membrane-bounded organelle,protein binding,organelle,intracellular membrane-bounded organelle,intracellular organelle,organic substance metabolic process,cytoplasmic part,cellular metabolic process,binding,primary metabolic process,cellular_component,nucleus,regulation of metabolic process,metabolic process,regulation of catalytic activity,positi…	ssc05210,ssc04015,ssc05212,ssc05200,ssc04014	Colorectal cancer,Rap1 signaling pathway,Pancreatic cancer,Pathways in cancer,Ras signaling pathway
ENSSSCT00000035570	ENSSSCG00000005943	ST3GAL1	chr4:7685581-7776990	0.825618	0.135351	2.60877	0.04465	0.426154	ST3 beta-galactoside alpha-2,3-sialyltransferase 1 [Source:HGNC Symbol;Acc:HGNC:10862]	--	--	ssc00512,ssc00603,ssc00533,ssc00604,ssc01100	Mucin type O-Glycan biosynthesis,Glycosphingolipid biosynthesis - globo series,Glycosaminoglycan biosynthesis - keratan sulfate,Glycosphingolipid biosynthesis - ganglio series,Metabolic pathways
ENSSSCT00000004481	ENSSSCG00000004053	TAGAP	chr1:10042141-10052624	14.7015	9.93029	0.566055	5e-05	0.00318682	t-cell activation Rho GTPase-activating protein [Source:RefSeq peptide;Acc:NP_001230472]	--	--	--	--
ENSSSCT00000002650	ENSSSCG00000002383	FOS	chr7:104293656-104297121	80.019	48.1097	0.734013	5e-05	0.00318682	FBJ murine osteosarcoma viral oncogene homolog [Source:HGNC Symbol;Acc:HGNC:3796]	--	--	ssc05168,ssc04620,ssc05031,ssc05161,ssc04725,ssc05140,ssc04380,ssc05133,ssc05200,ssc04668,ssc04728,ssc04713,ssc04917,ssc05166,ssc05210,ssc04662,ssc05132,ssc04915,ssc05142,ssc04921,ssc04024,ssc04660,ssc04010,ssc05323	Herpes simplex infection,Toll-like receptor signaling pathway,Amphetamine addiction,Hepatitis B,Cholinergic synapse,Leishmaniasis,Osteoclast differentiation,Pertussis,Pathways in cancer,TNF signaling pathway,Dopaminergic synapse,Circadian entrainment,Prolactin signaling pathway,HTLV-I infection,Colorectal cancer,B cell receptor signaling pathway,Salmonella infection,Estrogen signaling pathway,Cha…
ENSSSCT00000016705	ENSSSCG00000015332	-	chr9:82327317-82339662	29.1075	39.3047	-0.433311	0.01965	0.276334	serum paraoxonase/arylesterase 1 precursor [Source:RefSeq peptide;Acc:NP_001090984]	GO:0042221,GO:0004063,GO:0050896,GO:0006796,GO:0006793,GO:0016311,GO:0016840,GO:0016843,GO:0016844,GO:0004064,GO:0008150,GO:0009987,GO:0008152,GO:0009636,GO:0003674,GO:0003824,GO:0044237,GO:0005575,GO:0052689,GO:0016829,GO:0016787,GO:0005615,GO:0016791,GO:0042578,GO:0016788,GO:0009058,GO:0005576,GO:0044421	response to chemical stimulus,aryldialkylphosphatase activity,response to stimulus,phosphate-containing compound metabolic process,phosphorus metabolic process,dephosphorylation,carbon-nitrogen lyase activity,amine-lyase activity,strictosidine synthase activity,arylesterase activity,biological_process,cellular process,metabolic process,response to toxic substance,molecular_function,catalytic acti…	ssc01100	Metabolic pathways
ENSSSCT00000006030	ENSSSCG00000005484	ZNF618	chr1:285628675-285700029	0.87619	0.455985	0.942258	0.0024	0.0708868	zinc finger protein 618 [Source:HGNC Symbol;Acc:HGNC:29416]	--	--	--	--
ENSSSCT00000028150	ENSSSCG00000025181	-	chr3:109622368-109667785	76.6358	31.4879	1.28322	5e-05	0.00318682	--	--	--	ssc05164,ssc05162,ssc05160,ssc05168,ssc05169,ssc05203,ssc04141	Influenza A,Measles,Hepatitis C,Herpes simplex infection,Epstein-Barr virus infection,Viral carcinogenesis,Protein processing in endoplasmic reticulum
ENSSSCT00000012637	ENSSSCG00000011547	CPNE9	chr13:73136410-73147479	0.869616	0.455784	0.932027	0.0377	0.391557	copine family member IX [Source:HGNC Symbol;Acc:HGNC:24336]	GO:0005615,GO:0005515,GO:0043227,GO:0003674,GO:0043226,GO:0005575,GO:0005576,GO:0044421,GO:0005488,GO:0043230,GO:0065010,GO:0070062,GO:0031988,GO:0031982	extracellular space,protein binding,membrane-bounded organelle,molecular_function,organelle,cellular_component,extracellular region,extracellular region part,binding,extracellular organelle,extracellular membrane-bounded organelle,extracellular vesicular exosome,membrane-bounded vesicle,vesicle	--	--
ENSSSCT00000015917	ENSSSCG00000014567	TRIM66	chr9:909393-936403	0.756343	0.409866	0.883887	0.03335	0.367846	tripartite motif containing 66 [Source:HGNC Symbol;Acc:HGNC:29005]	--	--	--	--
ENSSSCT00000015915	ENSSSCG00000014565	-	chr2:162095325-162097509	52.5917	10.4213	2.3353	5e-05	0.00318682	--	--	--	--	--
ENSSSCT00000024470	ENSSSCG00000030197	-	chr3:91976868-91990595	5.43925	6.7995	-0.32202	0.04485	0.427127	--	--	--	ssc05100	Bacterial invasion of epithelial cells
ENSSSCT00000024474	ENSSSCG00000027709	PARP9	chr13:147586920-147621804	37.3424	13.3183	1.4874	5e-05	0.00318682	poly(ADP-ribose) polymerase family member 9 [Source:HGNC Symbol;Acc:HGNC:24118]	--	--	--	--
ENSSSCT00000016131	ENSSSCG00000014780	TRIM21	chr9:6536120-6543906	35.1199	20.5571	0.772654	5e-05	0.00318682	tripartite motif containing 21 [Source:HGNC Symbol;Acc:HGNC:11312]	--	--	ssc05322	Systemic lupus erythematosus
ENSSSCT00000018666	ENSSSCG00000017146	RNF213	chr12:1995857-2099373	49.6911	16.9911	1.54821	5e-05	0.00318682	ring finger protein 213 [Source:HGNC Symbol;Acc:HGNC:14539]	GO:0016567,GO:0032446,GO:0070647,GO:0004842,GO:0019787,GO:0016881,GO:0016879,GO:1901363,GO:0016874,GO:0097159,GO:0005515,GO:0036094,GO:0008150,GO:0009987,GO:0000166,GO:1901265,GO:0043412,GO:0008152,GO:0016462,GO:0016818,GO:0016817,GO:0046914,GO:0035639,GO:0001883,GO:0032550,GO:0001882,GO:0032549,GO:0008270,GO:0032555,GO:0017076,GO:0032553,GO:0006464,GO:0036211,GO:0003674,GO:0005488,GO:0043168,GO:…	protein ubiquitination,protein modification by small protein conjugation,protein modification by small protein conjugation or removal,ubiquitin-protein ligase activity,small conjugating protein ligase activity,acid-amino acid ligase activity,ligase activity, forming carbon-nitrogen bonds,heterocyclic compound binding,ligase activity,organic cyclic compound binding,protein binding,small molecule b…	--	--
ENSSSCT00000018668	ENSSSCG00000017148	-	chr12:2102368-2163107	48.1928	16.7513	1.52455	5e-05	0.00318682	--	GO:0016567,GO:0032446,GO:0070647,GO:0004842,GO:0019787,GO:0016881,GO:0016879,GO:0016874,GO:0008150,GO:0009987,GO:0043412,GO:0008152,GO:0016462,GO:0016818,GO:0016817,GO:0006464,GO:0036211,GO:0003674,GO:0003824,GO:0044237,GO:0017111,GO:0019538,GO:0044267,GO:0016787,GO:0044238,GO:0043170,GO:0044260,GO:0016887,GO:0071704	protein ubiquitination,protein modification by small protein conjugation,protein modification by small protein conjugation or removal,ubiquitin-protein ligase activity,small conjugating protein ligase activity,acid-amino acid ligase activity,ligase activity, forming carbon-nitrogen bonds,ligase activity,biological_process,cellular process,macromolecule modification,metabolic process,pyrophosphata…	--	--
ENSSSCT00000029676	ENSSSCG00000009611	XPO7	chr14:6629337-6721983	30.3137	17.4532	0.796477	0.01425	0.228964	exportin 7 [Source:HGNC Symbol;Acc:HGNC:14108]	--	--	--	--
ENSSSCT00000007388	ENSSSCG00000006743	SLC22A15	chr4:114752825-114845145	9.96341	7.9932	0.317866	0.0318	0.358418	solute carrier family 22 member 15 [Source:HGNC Symbol;Acc:HGNC:20301]	--	--	--	--
ENSSSCT00000007031	ENSSSCG00000006418	-	chr4:99372428-99425706	2.13615	1.1837	0.851705	0.0004	0.0182909	--	--	--	--	--
ENSSSCT00000006805	ENSSSCG00000006209	-	chr4:74131918-74223591	46.5745	38.2322	0.284754	0.04875	0.445664	--	--	--	--	--
ENSSSCT00000006801	ENSSSCG00000006206	-	chr4:73957675-73977954	12.9573	16.0383	-0.307753	0.0322	0.360761	--	--	--	ssc04068,ssc04151	FoxO signaling pathway,PI3K-Akt signaling pathway
ENSSSCT00000035606	ENSSSCG00000026569	CLEC16A	chr3:32907621-32920709	28.5542	20.316	0.491089	0.04535	0.429624	C-type lectin domain family 16 member A [Source:HGNC Symbol;Acc:HGNC:29013]	--	--	--	--
ENSSSCT00000023621	ENSSSCG00000023306	ELMO2	chr17:54169963-54191151	14.5211	11.7663	0.303484	0.039	0.398463	engulfment and cell motility 2 [Source:HGNC Symbol;Acc:HGNC:17233]	--	--	--	--
ENSSSCT00000018432	ENSSSCG00000016925	PLK2	chr16:40067322-40073386	6.74254	4.88252	0.465668	0.0091	0.173126	polo-like kinase 2 [Source:HGNC Symbol;Acc:HGNC:19699]	GO:0050896,GO:0051726,GO:0010948,GO:0048583,GO:0048523,GO:0000075,GO:0007049,GO:0005737,GO:0048519,GO:1901988,GO:0007610,GO:0010564,GO:0048584,GO:0042981,GO:0051716,GO:0043067,GO:0003824,GO:1901987,GO:0022402,GO:0051239,GO:0010941,GO:0044424,GO:0007243,GO:0044770,GO:0006915,GO:0048518,GO:0005515,GO:0009967,GO:0048522,GO:0043412,GO:0012501,GO:0065008,GO:0023056,GO:0010647,GO:0007093,GO:0005694,GO:…	response to stimulus,regulation of cell cycle,negative regulation of cell cycle process,regulation of response to stimulus,negative regulation of cellular process,cell cycle checkpoint,cell cycle,cytoplasm,negative regulation of biological process,negative regulation of cell cycle phase transition,behavior,regulation of cell cycle process,positive regulation of response to stimulus,regulation of …	ssc04068	FoxO signaling pathway
ENSSSCT00000023124	ENSSSCG00000021504	IFN-ALPHAOMEGA	chr1:225450726-225451285	0.899975	0	inf	5e-05	0.00318682	-	--	--	ssc05164,ssc05168,ssc05162,ssc04623,ssc04620,ssc05160,ssc05152,ssc05161,ssc04060,ssc04630,ssc04650,ssc04622,ssc04151,ssc05320,ssc04140	Influenza A,Herpes simplex infection,Measles,Cytosolic DNA-sensing pathway,Toll-like receptor signaling pathway,Hepatitis C,Tuberculosis,Hepatitis B,Cytokine-cytokine receptor interaction,Jak-STAT signaling pathway,Natural killer cell mediated cytotoxicity,RIG-I-like receptor signaling pathway,PI3K-Akt signaling pathway,Autoimmune thyroid disease,Regulation of autophagy
ENSSSCT00000016501	ENSSSCG00000015135	SORL1	chr9:53830780-53907681	24.7347	17.8699	0.469002	0.00055	0.0234187	sortilin-related receptor, L(DLR class) A repeats containing [Source:HGNC Symbol;Acc:HGNC:11185]	--	--	--	--
ENSSSCT00000004830	ENSSSCG00000004369	-	chr1:81577473-81601278	11.4226	8.39635	0.444053	0.00265	0.0762516	--	--	--	--	--
ENSSSCT00000022256	ENSSSCG00000022011	NMI	chr15:3599-29467	28.2795	23.2764	0.280891	0.04695	0.437437	N-myc and STAT interactor [Source:HGNC Symbol;Acc:HGNC:7854]	--	--	--	--
ENSSSCT00000031244	ENSSSCG00000023529	-	chr2:8735723-8738518	0.828815	0.49236	0.751336	0.04925	0.447928	--	--	--	--	--
ENSSSCT00000019350	ENSSSCG00000017778	-	chr12:47140305-47140863	1.36407	0.598928	1.18747	0.041	0.409216	--	--	--	--	--
ENSSSCT00000036666	ENSSSCG00000010914	NAV1	chr10:28541016-28541979	2.51384	1.28191	0.9716	0.00445	0.108492	neuron navigator 1 [Source:HGNC Symbol;Acc:HGNC:15989]	--	--	--	--
ENSSSCT00000033361	ENSSSCG00000006734	CD101	chr4:113657783-113699309	0.896652	0.430648	1.05804	0.01155	0.20067	CD101 molecule [Source:HGNC Symbol;Acc:HGNC:5949]	--	--	--	--
ENSSSCT00000023548	ENSSSCG00000030243	-	chr6:71724720-71736183	26.6576	21.5609	0.306127	0.04025	0.405078	--	--	--	--	--
ENSSSCT00000029735	ENSSSCG00000023050	2017-09-10	chr3:47790818-47829498	3.58676	5.0254	-0.486557	0.0335	0.368671	septin 10 [Source:HGNC Symbol;Acc:HGNC:14349]	--	--	--	--
ENSSSCT00000005401	ENSSSCG00000004895	BCL2	chr1:175695536-175696139	3.96605	2.41422	0.716146	0.03305	0.365955	B-cell CLL/lymphoma 2 [Source:HGNC Symbol;Acc:HGNC:990]	--	--	ssc05161,ssc04064,ssc05210,ssc05200,ssc05152,ssc04722,ssc04066,ssc04210,ssc04725,ssc05145,ssc05014,ssc05215,ssc04141,ssc04261,ssc05169,ssc04151,ssc05206,ssc05222,ssc04510	Hepatitis B,NF-kappa B signaling pathway,Colorectal cancer,Pathways in cancer,Tuberculosis,Neurotrophin signaling pathway,HIF-1 signaling pathway,Apoptosis,Cholinergic synapse,Toxoplasmosis,Amyotrophic lateral sclerosis (ALS),Prostate cancer,Protein processing in endoplasmic reticulum,Adrenergic signaling in cardiomyocytes,Epstein-Barr virus infection,PI3K-Akt signaling pathway,MicroRNAs in cance…
ENSSSCT00000005403	ENSSSCG00000004897	ZCCHC2	chr1:176374031-176410884	17.4048	12.6149	0.464351	0.00185	0.0585143	zinc finger, CCHC domain containing 2 [Source:HGNC Symbol;Acc:HGNC:22916]	--	--	--	--
ENSSSCT00000034495	ENSSSCG00000010453	IFIT1	chr14:110223575-110235651	204.812	22.6809	3.17475	5e-05	0.00318682	interferon induced protein with tetratricopeptide repeats 1 [Source:HGNC Symbol;Acc:HGNC:5407]	GO:0009615,GO:0051607,GO:0002252,GO:0034340,GO:0048525,GO:0051707,GO:0009607,GO:0045071,GO:0043901,GO:0071357,GO:0045087,GO:0051704,GO:0006952,GO:0034097,GO:0045069,GO:0050792,GO:0019079,GO:0043903,GO:0019058,GO:0060337,GO:0043900,GO:0010033,GO:0006950,GO:0071310,GO:0071345,GO:0016032,GO:0044764,GO:0006955,GO:0044403,GO:0044419,GO:0002376,GO:0070887,GO:0031347,GO:0080134,GO:0042221,GO:0019221,GO:…	response to virus,defense response to virus,immune effector process,response to type I interferon,negative regulation of viral process,response to other organism,response to biotic stimulus,negative regulation of viral genome replication,negative regulation of multi-organism process,cellular response to type I interferon,innate immune response,multi-organism process,defense response,response to c…	ssc05160,ssc05168	Hepatitis C,Herpes simplex infection
ENSSSCT00000022361	ENSSSCG00000023912	-	chr3:9576019-9588793	14.3008	11.5713	0.305537	0.03325	0.367173	--	--	--	ssc04020	Calcium signaling pathway
ENSSSCT00000005332	ENSSSCG00000004830	ATP10A	chr1:157470910-157522115	16.1217	11.9431	0.432828	0.00215	0.0654264	ATPase, class V, type 10A [Source:HGNC Symbol;Acc:HGNC:13542]	--	--	--	--
ENSSSCT00000024751	ENSSSCG00000020882	-	chr5:9313195-9331848	0.603465	0.220637	1.45159	0.0011	0.0397093	--	--	--	--	--
ENSSSCT00000022756	ENSSSCG00000023949	PIM3	chr5:111031425-111032812	17.1316	12.6491	0.437626	0.0127	0.213021	Pim-3 proto-oncogene, serine/threonine kinase [Source:HGNC Symbol;Acc:HGNC:19310]	--	--	--	--
ENSSSCT00000018327	ENSSSCG00000016832	IL7R	chr16:22282646-22313804	26.44	15.1298	0.805334	5e-05	0.00318682	interleukin 7 receptor [Source:HGNC Symbol;Acc:HGNC:6024]	--	--	ssc04060,ssc04640,ssc05340,ssc04630,ssc04068,ssc04151	Cytokine-cytokine receptor interaction,Hematopoietic cell lineage,Primary immunodeficiency,Jak-STAT signaling pathway,FoxO signaling pathway,PI3K-Akt signaling pathway
ENSSSCT00000008405	ENSSSCG00000007665	-	chr3:7837928-7839602	0.82648	0.450146	0.876587	0.02005	0.27957	--	--	--	ssc04930,ssc04068,ssc04910,ssc04152,ssc04920,ssc04022	Type II diabetes mellitus,FoxO signaling pathway,Insulin signaling pathway,AMPK signaling pathway,Adipocytokine signaling pathway,cGMP-PKG signaling pathway
ENSSSCT00000025308	ENSSSCG00000030456	-	GL893411.2:926-5997	97.7643	79.8278	0.292417	0.0323	0.361329	--	--	--	ssc00140,ssc05204,ssc00380,ssc04913,ssc00980,ssc05206	Steroid hormone biosynthesis,Chemical carcinogenesis,Tryptophan metabolism,Ovarian steroidogenesis,Metabolism of xenobiotics by cytochrome P450,MicroRNAs in cancer
ENSSSCT00000016437	ENSSSCG00000015071	SIK3	chr9:49296589-49404314	3.37657	1.8349	0.879854	0.0001	0.00583627	SIK family kinase 3 [Source:HGNC Symbol;Acc:HGNC:29165]	GO:0006796,GO:0006793,GO:1901363,GO:0097159,GO:0036094,GO:0008150,GO:0016310,GO:0009987,GO:0000166,GO:1901265,GO:0043412,GO:0008152,GO:0016772,GO:0035639,GO:0001883,GO:0032550,GO:0001882,GO:0032549,GO:0032555,GO:0017076,GO:0032553,GO:0006464,GO:0036211,GO:0003674,GO:0016301,GO:0005488,GO:0043168,GO:0003824,GO:0044237,GO:0005575,GO:0019538,GO:0044267,GO:0044238,GO:0006468,GO:0043170,GO:0044260,GO:…	phosphate-containing compound metabolic process,phosphorus metabolic process,heterocyclic compound binding,organic cyclic compound binding,small molecule binding,biological_process,phosphorylation,cellular process,nucleotide binding,nucleoside phosphate binding,macromolecule modification,metabolic process,transferase activity, transferring phosphorus-containing groups,purine ribonucleoside tripho…	--	--
ENSSSCT00000018974	ENSSSCG00000017428	JUP	chr12:21145389-21174257	5.6147	3.90957	0.522199	0.00275	0.0782372	junction plakoglobin [Source:HGNC Symbol;Acc:HGNC:6207]	--	--	ssc05221,ssc05200,ssc05412,ssc05202	Acute myeloid leukemia,Pathways in cancer,Arrhythmogenic right ventricular cardiomyopathy (ARVC),Transcriptional misregulation in cancer
ENSSSCT00000012435	ENSSSCG00000011358	TREX1	chr13:34561815-34563334	41.1709	27.9562	0.558453	0.0004	0.0182909	three prime repair exonuclease 1 [Source:HGNC Symbol;Acc:HGNC:12269]	--	--	ssc04623	Cytosolic DNA-sensing pathway
ENSSSCT00000012434	ENSSSCG00000011357	SHISA5	chr13:34558568-34561740	41.3349	33.7161	0.293922	0.0414	0.411222	shisa family member 5 [Source:HGNC Symbol;Acc:HGNC:30376]	--	--	ssc04115	p53 signaling pathway
ENSSSCT00000029113	ENSSSCG00000027645	-	JH118988.1:19743-44970	0.500149	0.245672	1.02563	0.01845	0.266378	--	--	--	--	--
ENSSSCT00000009107	ENSSSCG00000008316	NAGK	chr3:74949399-74959068	164.23	132.797	0.306496	0.02555	0.317192	N-acetylglucosamine kinase [Source:HGNC Symbol;Acc:HGNC:17174]	--	--	ssc00520	Amino sugar and nucleotide sugar metabolism
ENSSSCT00000023198	ENSSSCG00000027291	-	GL896202.2:40862-43088	0.512544	1.72182	-1.74819	0.02755	0.330908	Interleukin-8 [Source:UniProtKB/Swiss-Prot;Acc:P26894]	GO:0002252,GO:0002376,GO:0006955,GO:0051707,GO:0009607,GO:0034097,GO:0006952,GO:0010033,GO:0051704,GO:0006950,GO:0002682,GO:0070887,GO:0071345,GO:0071310,GO:0042221,GO:0050896,GO:0050920,GO:0071622,GO:0071624,GO:0090022,GO:0090023,GO:0050795,GO:0019221,GO:0005125,GO:0048583,GO:0002684,GO:0016477,GO:0030334,GO:1901700,GO:0007610,GO:0005126,GO:2000145,GO:0048870,GO:0051674,GO:0033993,GO:0006935,GO:…	immune effector process,immune system process,immune response,response to other organism,response to biotic stimulus,response to cytokine stimulus,defense response,response to organic substance,multi-organism process,response to stress,regulation of immune system process,cellular response to chemical stimulus,cellular response to cytokine stimulus,cellular response to organic substance,response t…	ssc05164,ssc04620,ssc05160,ssc05323,ssc04060,ssc05133,ssc04622,ssc05142,ssc05161,ssc04621,ssc04064,ssc05132,ssc05144,ssc04062,ssc05219,ssc05134,ssc05200,ssc05146,ssc04932,ssc05202	Influenza A,Toll-like receptor signaling pathway,Hepatitis C,Rheumatoid arthritis,Cytokine-cytokine receptor interaction,Pertussis,RIG-I-like receptor signaling pathway,Chagas disease (American trypanosomiasis),Hepatitis B,NOD-like receptor signaling pathway,NF-kappa B signaling pathway,Salmonella infection,Malaria,Chemokine signaling pathway,Bladder cancer,Legionellosis,Pathways in cancer,Amoebi…
ENSSSCT00000028163	ENSSSCG00000024951	-	GL894064.1:240-11152	12.5751	8.77689	0.518786	0.03555	0.380121	--	--	--	--	--
ENSSSCT00000015464	ENSSSCG00000014156	ARRDC3	chr2:101569558-101583976	32.1205	24.6125	0.384102	0.0052	0.120865	arrestin domain containing 3 [Source:HGNC Symbol;Acc:HGNC:29263]	--	--	--	--
ENSSSCT00000030848	ENSSSCG00000022312	RHPN2	chr6:38328022-38417716	4.60444	0.567961	3.01916	0.03595	0.382426	rhophilin, Rho GTPase binding protein 2 [Source:HGNC Symbol;Acc:HGNC:19974]	--	--	--	--
ENSSSCT00000000277	ENSSSCG00000000258	RARG	chr5:18846916-18857897	1.35974	1.87664	-0.464816	0.0415	0.411736	retinoic acid receptor, gamma [Source:HGNC Symbol;Acc:HGNC:9866]	--	--	--	--
ENSSSCT00000025487	ENSSSCG00000023716	TNFAIP6	chr15:90395-102494	0.515105	1.04373	-1.0188	0.04705	0.437899	TNF alpha induced protein 6 [Source:HGNC Symbol;Acc:HGNC:11898]	--	--	--	--
ENSSSCT00000007599	ENSSSCG00000006936	ODF2L	chr4:142246489-142276543	1.70949	1.14032	0.584128	0.02735	0.329577	outer dense fiber of sperm tails 2-like [Source:HGNC Symbol;Acc:HGNC:29225]	--	--	--	--
ENSSSCT00000035772	ENSSSCG00000014564	IFITM1	chr2:162099156-162210447	150.182	40.9725	1.87399	0.0019	0.059695	-	--	--	--	--
ENSSSCT00000036086	ENSSSCG00000027806	SAMHD1	chr17:45549109-45582808	20.6749	15.167	0.446946	0.0107	0.191159	-	--	--	--	--
ENSSSCT00000024853	ENSSSCG00000028634	-	chr14:82134860-82138319	6.82271	8.63032	-0.339069	0.0425	0.417111	--	--	--	ssc03010	Ribosome
ENSSSCT00000019546	ENSSSCG00000017962	-	chr12:55465576-55474333	0.629027	0.421323	0.578195	0.02835	0.33638	--	--	--	--	--
ENSSSCT00000024387	ENSSSCG00000030294	ZNF398	chr9:120110664-120138567	1.30666	1.81163	-0.471404	0.0442	0.424561	zinc finger protein 398 [Source:HGNC Symbol;Acc:HGNC:18373]	--	--	--	--
ENSSSCT00000019290	ENSSSCG00000017723	CCL2	chr12:42514167-42516128	36.5447	15.3326	1.25305	5e-05	0.00318682	C-C motif chemokine 2 [Source:UniProtKB/Swiss-Prot;Acc:P42831]	--	--	ssc05164,ssc05168,ssc04668,ssc04621,ssc04060,ssc04062,ssc05142,ssc05144,ssc05323	Influenza A,Herpes simplex infection,TNF signaling pathway,NOD-like receptor signaling pathway,Cytokine-cytokine receptor interaction,Chemokine signaling pathway,Chagas disease (American trypanosomiasis),Malaria,Rheumatoid arthritis
ENSSSCT00000025529	ENSSSCG00000023310	-	chr14:72207198-72207571	2.67727	0.849978	1.65526	0.035	0.377155	--	--	--	--	--
ENSSSCT00000026743	ENSSSCG00000026362	HES1	chr13:140633172-140635748	1.63054	1.06017	0.621049	0.03735	0.389599	hes family bHLH transcription factor 1 [Source:HGNC Symbol;Acc:HGNC:5192]	GO:0002376,GO:0002520,GO:0005737,GO:0044424,GO:0045444,GO:0030097,GO:0005622,GO:0048534,GO:0043227,GO:0005515,GO:0048514,GO:0043226,GO:0045598,GO:0043231,GO:0044446,GO:0043229,GO:0002244,GO:0006605,GO:0044422,GO:0048646,GO:0035886,GO:0097084,GO:0002682,GO:0006928,GO:0009058,GO:0050731,GO:0022603,GO:0071704,GO:0021783,GO:0048486,GO:0010467,GO:0046907,GO:0044237,GO:0032268,GO:0001944,GO:1901576,GO:…	immune system process,immune system development,cytoplasm,intracellular part,fat cell differentiation,hemopoiesis,intracellular,hematopoietic or lymphoid organ development,membrane-bounded organelle,protein binding,blood vessel morphogenesis,organelle,regulation of fat cell differentiation,intracellular membrane-bounded organelle,intracellular organelle part,intracellular organelle,hematopoietic …	ssc04330,ssc03460,ssc04950	Notch signaling pathway,Fanconi anemia pathway,Maturity onset diabetes of the young
ENSSSCT00000010253	ENSSSCG00000009356	RFXAP	chr11:12636922-12641834	6.58872	8.56023	-0.377651	0.03115	0.354266	regulatory factor X associated protein [Source:HGNC Symbol;Acc:HGNC:9988]	--	--	ssc05152,ssc04612,ssc05340	Tuberculosis,Antigen processing and presentation,Primary immunodeficiency
ENSSSCT00000009725	ENSSSCG00000008882	-	chr13:12164825-12166863	72.2362	0.649993	6.79615	5e-05	0.00318682	ribosomal protein L15 [Source:RefSeq peptide;Acc:NP_001230994]	--	--	ssc03010	Ribosome
ENSSSCT00000003552	ENSSSCG00000003197	MED25	chr6:50563384-50578613	7.48886	5.26768	0.507579	0.0035	0.0919229	mediator complex subunit 25 [Source:HGNC Symbol;Acc:HGNC:28845]	--	--	--	--
ENSSSCT00000015181	ENSSSCG00000013895	-	chr2:59234169-59255713	3.78522	2.80055	0.434665	0.02795	0.333637	--	--	--	--	--
ENSSSCT00000026880	ENSSSCG00000028736	-	chr2:162339841-162340860	41.6813	8.31655	2.32534	5e-05	0.00318682	--	--	--	--	--
ENSSSCT00000019110	ENSSSCG00000017555	LUC7L3	chr12:27142941-27170104	28.4036	36.1632	-0.348449	0.01645	0.250109	LUC7-like 3 pre-mRNA splicing factor [Source:HGNC Symbol;Acc:HGNC:24309]	--	--	--	--
ENSSSCT00000034426	ENSSSCG00000004154	TNFAIP3	chr1:29825729-29841626	43.1811	27.7429	0.63828	5e-05	0.00318682	TNF alpha induced protein 3 [Source:HGNC Symbol;Acc:HGNC:11896]	--	--	ssc05162,ssc04064,ssc04668,ssc04621,ssc05169	Measles,NF-kappa B signaling pathway,TNF signaling pathway,NOD-like receptor signaling pathway,Epstein-Barr virus infection
ENSSSCT00000017228	ENSSSCG00000015820	WHSC1L1	chr15:55338006-55406429	9.63494	7.74402	0.315193	0.0261	0.321171	Wolf-Hirschhorn syndrome candidate 1-like 1 [Source:HGNC Symbol;Acc:HGNC:12767]	--	--	ssc00310	Lysine degradation
ENSSSCT00000035464	ENSSSCG00000030801	GBP6	chr4:139280328-139299776	4.05594	2.21674	0.871598	0.0002	0.0104635	-	--	--	--	--
ENSSSCT00000026694	ENSSSCG00000030081	-	chr15:117982952-118007077	14.9268	19.4546	-0.382214	0.04215	0.415309	--	--	--	--	--
ENSSSCT00000001563	ENSSSCG00000001422	C2	chr7:27778159-27791677	127.705	102.24	0.32085	0.0209	0.286327	complement component 2 [Source:HGNC Symbol;Acc:HGNC:1248]	--	--	ssc05133,ssc05150,ssc04610,ssc05322	Pertussis,Staphylococcus aureus infection,Complement and coagulation cascades,Systemic lupus erythematosus
ENSSSCT00000025896	ENSSSCG00000023785	-	chr8:31792549-31822924	7.56668	1.48087	2.35322	5e-05	0.00318682	--	GO:0044425,GO:0016020,GO:0005575,GO:0016021,GO:0031224	membrane part,membrane,cellular_component,integral to membrane,intrinsic to membrane	--	--
ENSSSCT00000019323	ENSSSCG00000017754	-	chr12:46002257-46021360	55.406	27.5125	1.00995	5e-05	0.00318682	galectin-9 [Source:RefSeq peptide;Acc:NP_999097]	--	--	--	--
ENSSSCT00000033479	ENSSSCG00000023150	-	chr5:24186533-24201927	6.89793	5.25728	0.391847	0.01065	0.190577	--	--	--	ssc05144,ssc05010	Malaria,Alzheimer's disease
ENSSSCT00000012181	ENSSSCG00000011129	-	chr10:69769231-69843697	76.9662	62.5024	0.300314	0.0317	0.357848	--	--	--	--	--
ENSSSCT00000031628	ENSSSCG00000025627	-	GL894943.1:11970-36230	7.6907	9.93	-0.36868	0.0489	0.446304	--	--	--	--	--
ENSSSCT00000034940	ENSSSCG00000012077	MX1	chr13:214988890-215011264	108.454	15.0795	2.84642	5e-05	0.00318682	MX dynamin-like GTPase 1 [Source:HGNC Symbol;Acc:HGNC:7532]	GO:0009615,GO:0051607,GO:0002252,GO:0034340,GO:0048525,GO:0051707,GO:0009607,GO:0045071,GO:0043901,GO:0071357,GO:0045087,GO:0051704,GO:0006952,GO:0034097,GO:0045069,GO:0050792,GO:0019079,GO:0043903,GO:0019058,GO:0043900,GO:0010033,GO:0006950,GO:0071310,GO:0071345,GO:0016032,GO:0044764,GO:0006955,GO:0044403,GO:0044419,GO:0002376,GO:0070887,GO:0042221,GO:0044766,GO:0005635,GO:0005829,GO:0005525,GO:…	response to virus,defense response to virus,immune effector process,response to type I interferon,negative regulation of viral process,response to other organism,response to biotic stimulus,negative regulation of viral genome replication,negative regulation of multi-organism process,cellular response to type I interferon,innate immune response,multi-organism process,defense response,response to c…	ssc05164,ssc05162	Influenza A,Measles
ENSSSCT00000019288	ENSSSCG00000017721	CCL8	chr12:42456841-42458852	82.4375	54.1582	0.606119	0.00045	0.0200341	chemokine (C-C motif) ligand 8 [Source:HGNC Symbol;Acc:HGNC:10635]	--	--	ssc04062,ssc04060	Chemokine signaling pathway,Cytokine-cytokine receptor interaction
ENSSSCT00000013131	ENSSSCG00000012000	-	chr13:184018401-184112967	122.38	149.144	-0.285341	0.0408	0.408125	--	GO:0005575,GO:0005488,GO:0071704,GO:0044238,GO:0008152,GO:0003824,GO:0016020,GO:0043167,GO:0043169,GO:0004553,GO:0016787,GO:0016798,GO:0003674,GO:0005975,GO:0008150,GO:0044425,GO:0016021,GO:0031224	cellular_component,binding,organic substance metabolic process,primary metabolic process,metabolic process,catalytic activity,membrane,ion binding,cation binding,hydrolase activity, hydrolyzing O-glycosyl compounds,hydrolase activity,hydrolase activity, acting on glycosyl bonds,molecular_function,carbohydrate metabolic process,biological_process,membrane part,integral to membrane,intrinsic to mem…	ssc00500,ssc01100	Starch and sucrose metabolism,Metabolic pathways
ENSSSCT00000013139	ENSSSCG00000012008	SAMSN1	chr13:189683757-189716074	20.8844	15.4242	0.437232	0.0309	0.352858	SAM domain, SH3 domain and nuclear localization signals 1 [Source:HGNC Symbol;Acc:HGNC:10528]	--	--	--	--
ENSSSCT00000029764	ENSSSCG00000027982	ISG15	GL895967.2:58448-59139	375.737	56.833	2.72492	5e-05	0.00318682	ISG15 ubiquitin-like modifier [Source:HGNC Symbol;Acc:HGNC:4053]	GO:0009615,GO:0051607,GO:0002252,GO:0034340,GO:0048525,GO:0051707,GO:0009607,GO:0045071,GO:0043901,GO:0045087,GO:0051704,GO:0006952,GO:0034097,GO:0045069,GO:0050792,GO:0019079,GO:0043903,GO:0019058,GO:0043900,GO:0010033,GO:0006950,GO:0016032,GO:0044764,GO:0006955,GO:0044403,GO:0044419,GO:0002376,GO:0032020,GO:0042221,GO:0016567,GO:0032446,GO:0070647,GO:0001817,GO:0031397,GO:0002682,GO:0001816,GO:…	response to virus,defense response to virus,immune effector process,response to type I interferon,negative regulation of viral process,response to other organism,response to biotic stimulus,negative regulation of viral genome replication,negative regulation of multi-organism process,innate immune response,multi-organism process,defense response,response to cytokine stimulus,regulation of viral ge…	ssc04622	RIG-I-like receptor signaling pathway
ENSSSCT00000001457	ENSSSCG00000001341	SLA-11	chr7:26674361-26684664	448.232	332.012	0.433013	0.00435	0.106781	-	GO:0002376,GO:0006955,GO:0005515,GO:0005488,GO:0044464,GO:0005623,GO:0042605,GO:0042612,GO:0042611,GO:0002474,GO:0003674,GO:0048002,GO:0033218,GO:0042277,GO:0032991,GO:0003823,GO:0005575,GO:0050896,GO:0043234,GO:0008150,GO:0019882,GO:0005102,GO:0044459,GO:0044425,GO:0016020,GO:0016021,GO:0031224,GO:0005886,GO:0071944	immune system process,immune response,protein binding,binding,cell part,cell,peptide antigen binding,MHC class I protein complex,MHC protein complex,antigen processing and presentation of peptide antigen via MHC class I,molecular_function,antigen processing and presentation of peptide antigen,amide binding,peptide binding,macromolecular complex,antigen binding,cellular_component,response to stimu…	ssc05168,ssc04144,ssc05203,ssc05169,ssc05416,ssc04612,ssc04514,ssc04145,ssc05332,ssc05330,ssc04940,ssc05320,ssc05166	Herpes simplex infection,Endocytosis,Viral carcinogenesis,Epstein-Barr virus infection,Viral myocarditis,Antigen processing and presentation,Cell adhesion molecules (CAMs),Phagosome,Graft-versus-host disease,Allograft rejection,Type I diabetes mellitus,Autoimmune thyroid disease,HTLV-I infection
ENSSSCT00000026345	ENSSSCG00000022843	-	chr12:2297791-2411578	37.6592	13.8162	1.44664	0.008	0.161106	--	--	--	--	--
ENSSSCT00000023730	ENSSSCG00000008572	GAREM2	chr3:119785951-119802934	4.09213	2.90054	0.49653	0.0162	0.247714	GRB2 associated regulator of MAPK1 subtype 2 [Source:HGNC Symbol;Acc:HGNC:27172]	--	--	--	--
ENSSSCT00000029565	ENSSSCG00000028326	NR4A1	GL892233.1:20-1787	3.65813	2.44899	0.57892	0.0328	0.364383	nuclear receptor subfamily 4 group A member 1 [Source:HGNC Symbol;Acc:HGNC:7980]	GO:0010033,GO:0070887,GO:0071310,GO:0042221,GO:0050896,GO:0051726,GO:0048523,GO:0007049,GO:0005737,GO:0048519,GO:1901700,GO:0048731,GO:0033993,GO:0043435,GO:0071376,GO:0048513,GO:0045444,GO:0007275,GO:0042981,GO:0031967,GO:0031975,GO:0051716,GO:0043067,GO:0005635,GO:0031965,GO:0043281,GO:0010941,GO:0044424,GO:2000116,GO:0030154,GO:0005654,GO:0042692,GO:0048856,GO:0032502,GO:0006915,GO:0048518,GO:…	response to organic substance,cellular response to chemical stimulus,cellular response to organic substance,response to chemical stimulus,response to stimulus,regulation of cell cycle,negative regulation of cellular process,cell cycle,cytoplasm,negative regulation of biological process,response to oxygen-containing compound,system development,response to lipid,response to corticotropin-releasing …	--	--
ENSSSCT00000009990	ENSSSCG00000009123	CAMK2D	chr8:116955004-117260328	24.9697	13.9483	0.840084	5e-05	0.00318682	calcium/calmodulin-dependent protein kinase II delta [Source:HGNC Symbol;Acc:HGNC:1462]	--	--	ssc04916,ssc05031,ssc04725,ssc04310,ssc04728,ssc04713,ssc05152,ssc04114,ssc04911,ssc04261,ssc04750,ssc04720,ssc04921,ssc04971,ssc04020,ssc04912,ssc05205,ssc04024,ssc05214,ssc04012,ssc04066,ssc04722,ssc04740	Melanogenesis,Amphetamine addiction,Cholinergic synapse,Wnt signaling pathway,Dopaminergic synapse,Circadian entrainment,Tuberculosis,Oocyte meiosis,Insulin secretion,Adrenergic signaling in cardiomyocytes,Inflammatory mediator regulation of TRP channels,Long-term potentiation,Oxytocin signaling pathway,Gastric acid secretion,Calcium signaling pathway,GnRH signaling pathway,Proteoglycans in cance…
ENSSSCT00000012032	ENSSSCG00000010991	AQP3	chr10:37307555-37313382	9.32376	6.77033	0.461685	0.0289	0.340023	aquaporin 3 (Gill blood group) [Source:HGNC Symbol;Acc:HGNC:636]	GO:0002376,GO:0010033,GO:0002682,GO:0042221,GO:0050896,GO:0002684,GO:0005737,GO:1901700,GO:0048731,GO:0033993,GO:0048513,GO:0019725,GO:0007275,GO:0042886,GO:0032526,GO:0048878,GO:0055082,GO:0042592,GO:0044424,GO:0048856,GO:0015204,GO:0015840,GO:0042887,GO:0071918,GO:0032502,GO:0003014,GO:0048518,GO:0005634,GO:0065008,GO:0044767,GO:0005622,GO:0043227,GO:0070293,GO:0070295,GO:0003674,GO:0043231,GO:…	immune system process,response to organic substance,regulation of immune system process,response to chemical stimulus,response to stimulus,positive regulation of immune system process,cytoplasm,response to oxygen-containing compound,system development,response to lipid,organ development,cellular homeostasis,multicellular organismal development,amide transport,response to retinoic acid,chemical ho…	ssc04962	Vasopressin-regulated water reabsorption
ENSSSCT00000023383	ENSSSCG00000021395	-	GL896415.1:6379-10932	85.3971	31.9409	1.41878	0.0416	0.412253	--	--	--	ssc00140,ssc00591,ssc05204,ssc00830,ssc01100	Steroid hormone biosynthesis,Linoleic acid metabolism,Chemical carcinogenesis,Retinol metabolism,Metabolic pathways
ENSSSCT00000011273	ENSSSCG00000010300	MSS51	chr14:82365033-82368687	2.76286	1.96132	0.494337	0.0345	0.374358	MSS51 mitochondrial translational activator [Source:HGNC Symbol;Acc:HGNC:21000]	--	--	--	--
ENSSSCT00000025037	ENSSSCG00000025851	-	JH118640.1:48460-112123	0.59886	0.891596	-0.574171	0.0397	0.402328	--	GO:0006950,GO:0050896,GO:0051726,GO:0010948,GO:0048523,GO:0000075,GO:0007049,GO:0000077,GO:0048519,GO:1901988,GO:0031570,GO:0010564,GO:0051716,GO:0003824,GO:1901987,GO:0022402,GO:0016787,GO:0006974,GO:0044770,GO:0033554,GO:0016788,GO:0000014,GO:0003674,GO:0006281,GO:0050789,GO:0065007,GO:0050794,GO:0044763,GO:0006259,GO:0004520,GO:0071704,GO:0044238,GO:0008152,GO:0044699,GO:0008150,GO:0009987,GO:…	response to stress,response to stimulus,regulation of cell cycle,negative regulation of cell cycle process,negative regulation of cellular process,cell cycle checkpoint,cell cycle,DNA damage checkpoint,negative regulation of biological process,negative regulation of cell cycle phase transition,DNA integrity checkpoint,regulation of cell cycle process,cellular response to stimulus,catalytic activi…	--	--
ENSSSCT00000001160	ENSSSCG00000001065	ATXN1	chr7:12903589-12921730	4.61075	3.43108	0.426341	0.02425	0.308022	ataxin 1 [Source:HGNC Symbol;Acc:HGNC:10548]	--	--	--	--
ENSSSCT00000025376	ENSSSCG00000023178	BATF2	chr2:6312309-6321081	9.64616	6.33534	0.606533	0.00035	0.0164533	basic leucine zipper transcription factor, ATF-like 2 [Source:HGNC Symbol;Acc:HGNC:25163]	--	--	--	--
ENSSSCT00000033336	ENSSSCG00000007964	MEFV	chr3:40322533-40336490	1.0638	0.681754	0.641907	0.01755	0.258911	-	--	--	ssc04621	NOD-like receptor signaling pathway
ENSSSCT00000009173	ENSSSCG00000008378	FAM161A	chr3:83788447-83814343	1.19678	1.71429	-0.51845	0.0387	0.39689	family with sequence similarity 161 member A [Source:HGNC Symbol;Acc:HGNC:25808]	--	--	--	--
ENSSSCT00000017015	ENSSSCG00000015621	PLXNA2	chr9:147877834-148015289	4.56605	3.45377	0.402776	0.0322	0.360761	plexin A2 [Source:HGNC Symbol;Acc:HGNC:9100]	GO:0071526,GO:0017154,GO:0005515,GO:0005488,GO:0050896,GO:0003674,GO:0051716,GO:0044425,GO:0016020,GO:0050789,GO:0065007,GO:0007166,GO:0005575,GO:0016021,GO:0031224,GO:0007165,GO:0044699,GO:0050794,GO:0044700,GO:0023052,GO:0044763,GO:0007154,GO:0009987,GO:0008150,GO:0004871,GO:0060089,GO:0004888,GO:0038023,GO:0004872	semaphorin-plexin signaling pathway,semaphorin receptor activity,protein binding,binding,response to stimulus,molecular_function,cellular response to stimulus,membrane part,membrane,regulation of biological process,biological regulation,cell surface receptor signaling pathway,cellular_component,integral to membrane,intrinsic to membrane,signal transduction,single-organism process,regulation of ce…	--	--
ENSSSCT00000013077	ENSSSCG00000011951	NFKBIZ	chr13:166744537-166776678	68.1623	47.2364	0.529074	0.00025	0.0125444	nuclear factor of kappa light polypeptide gene enhancer in B-cells inhibitor, zeta [Source:HGNC Symbol;Acc:HGNC:29805]	GO:0006952,GO:0044424,GO:0006950,GO:0010468,GO:0005622,GO:0010467,GO:0043231,GO:0043229,GO:0043227,GO:0005515,GO:0043226,GO:2000112,GO:0010556,GO:0060255,GO:0009058,GO:1901576,GO:0044249,GO:0034645,GO:0005634,GO:0090304,GO:0009059,GO:0019222,GO:0005575,GO:0031326,GO:0016070,GO:0009889,GO:0043170,GO:0044260,GO:1901360,GO:0051252,GO:0000988,GO:0005488,GO:0003712,GO:0006355,GO:2001141,GO:0006351,GO:…	defense response,intracellular part,response to stress,regulation of gene expression,intracellular,gene expression,intracellular membrane-bounded organelle,intracellular organelle,membrane-bounded organelle,protein binding,organelle,regulation of cellular macromolecule biosynthetic process,regulation of macromolecule biosynthetic process,regulation of macromolecule metabolic process,biosynthetic …	ssc05202	Transcriptional misregulation in cancer
ENSSSCT00000004202	ENSSSCG00000003797	DIRAS3	chr6:133865006-133867486	1.01744	0.576096	0.820557	0.0244	0.309109	DIRAS family, GTP-binding RAS-like 3 [Source:HGNC Symbol;Acc:HGNC:687]	GO:0005525,GO:0019001,GO:0032561,GO:0005622,GO:0015031,GO:0050896,GO:0045184,GO:1901363,GO:0097159,GO:0005515,GO:0036094,GO:0008150,GO:0071702,GO:0008104,GO:0051716,GO:0009987,GO:0050789,GO:0000166,GO:1901265,GO:0065007,GO:0035639,GO:0001883,GO:0032550,GO:0001882,GO:0032549,GO:0032555,GO:0017076,GO:0032553,GO:0050794,GO:0033036,GO:0044464,GO:0003674,GO:0005623,GO:0006810,GO:0005488,GO:0043168,GO:…	GTP binding,guanyl nucleotide binding,guanyl ribonucleotide binding,intracellular,protein transport,response to stimulus,establishment of protein localization,heterocyclic compound binding,organic cyclic compound binding,protein binding,small molecule binding,biological_process,organic substance transport,protein localization,cellular response to stimulus,cellular process,regulation of biological…	--	--
ENSSSCT00000025459	ENSSSCG00000024344	CCR5	chr13:32547167-32551732	22.2303	16.5082	0.429348	0.0132	0.218269	chemokine (C-C motif) receptor 5 (gene/pseudogene) [Source:HGNC Symbol;Acc:HGNC:1606]	--	--	ssc05203,ssc04062,ssc04060,ssc05145,ssc04144	Viral carcinogenesis,Chemokine signaling pathway,Cytokine-cytokine receptor interaction,Toxoplasmosis,Endocytosis
ENSSSCT00000026224	ENSSSCG00000021712	HERC6	GL892728.1:2196-17710	163.792	57.676	1.50582	5e-05	0.00318682	HECT and RLD domain containing E3 ubiquitin protein ligase family member 6 [Source:HGNC Symbol;Acc:HGNC:26072]	GO:0002376,GO:0016567,GO:0032446,GO:0005622,GO:0070647,GO:0004842,GO:0019787,GO:0044424,GO:0005737,GO:0016881,GO:0030097,GO:0016879,GO:0048534,GO:0043229,GO:0002520,GO:0016874,GO:0043231,GO:0008150,GO:0005634,GO:0043226,GO:0009987,GO:0043412,GO:0008152,GO:0043227,GO:0006464,GO:0036211,GO:0044464,GO:0003674,GO:0005623,GO:0002244,GO:0003824,GO:0044699,GO:0044237,GO:0048513,GO:0005575,GO:0044763,GO:…	immune system process,protein ubiquitination,protein modification by small protein conjugation,intracellular,protein modification by small protein conjugation or removal,ubiquitin-protein ligase activity,small conjugating protein ligase activity,intracellular part,cytoplasm,acid-amino acid ligase activity,hemopoiesis,ligase activity, forming carbon-nitrogen bonds,hematopoietic or lymphoid organ d…	--	--
ENSSSCT00000018398	ENSSSCG00000016893	NDUFS4	chr16:34963054-34992624	112.377	139.825	-0.315276	0.0321	0.360165	NADH:ubiquinone oxidoreductase subunit S4 [Source:HGNC Symbol;Acc:HGNC:7711]	GO:0010033,GO:0042221,GO:0050896,GO:0005737,GO:1901700,GO:0048731,GO:0048513,GO:0007275,GO:0031967,GO:0031975,GO:0051716,GO:0003824,GO:0048146,GO:0048144,GO:0048145,GO:0044424,GO:0010257,GO:0032981,GO:0097031,GO:0048856,GO:0032502,GO:0042127,GO:0048518,GO:0048522,GO:0043412,GO:0008283,GO:0044767,GO:0005622,GO:0006464,GO:0036211,GO:0043227,GO:0006796,GO:0006793,GO:0003674,GO:0043231,GO:0008284,GO:…	response to organic substance,response to chemical stimulus,response to stimulus,cytoplasm,response to oxygen-containing compound,system development,organ development,multicellular organismal development,organelle envelope,envelope,cellular response to stimulus,catalytic activity,positive regulation of fibroblast proliferation,fibroblast proliferation,regulation of fibroblast proliferation,intrac…	ssc04932,ssc05010,ssc00190,ssc05012,ssc05016,ssc01100	Non-alcoholic fatty liver disease (NAFLD),Alzheimer's disease,Oxidative phosphorylation,Parkinson's disease,Huntington's disease,Metabolic pathways
ENSSSCT00000008014	ENSSSCG00000007324	SOGA1	chr17:45467692-45539349	4.04843	3.17997	0.348347	0.03655	0.385567	suppressor of glucose, autophagy associated 1 [Source:HGNC Symbol;Acc:HGNC:16111]	--	--	--	--
ENSSSCT00000012170	ENSSSCG00000011120	USP6NL	chr10:66137768-66195086	12.0309	9.61903	0.322784	0.0407	0.407543	USP6 N-terminal like [Source:HGNC Symbol;Acc:HGNC:16858]	--	--	--	--
ENSSSCT00000000876	ENSSSCG00000000807	SLC38A1	chr5:79937451-80001030	5.15093	3.86177	0.415572	0.04555	0.4305	solute carrier family 38 member 1 [Source:HGNC Symbol;Acc:HGNC:13447]	--	--	ssc04724,ssc04727	Glutamatergic synapse,GABAergic synapse
ENSSSCT00000026979	ENSSSCG00000025910	ZNF277	chr18:36184985-36214490	46.3555	60.9076	-0.393882	0.01925	0.272924	zinc finger protein 277 [Source:HGNC Symbol;Acc:HGNC:13070]	GO:0006950,GO:0005515,GO:0080134,GO:0070887,GO:0097159,GO:1901363,GO:0050793,GO:0005488,GO:0032502,GO:0048583,GO:0003676,GO:0044767,GO:0033554,GO:0080135,GO:0034614,GO:0090398,GO:0070301,GO:1901701,GO:0034599,GO:2000772,GO:0006979,GO:0042542,GO:0007569,GO:0000302,GO:1901700,GO:0000975,GO:0001067,GO:0090342,GO:0003674,GO:0007568,GO:0050896,GO:0003677,GO:0044212,GO:0000976,GO:0000977,GO:0001012,GO:…	response to stress,protein binding,regulation of response to stress,cellular response to chemical stimulus,organic cyclic compound binding,heterocyclic compound binding,regulation of developmental process,binding,developmental process,regulation of response to stimulus,nucleic acid binding,single-organism developmental process,cellular response to stress,regulation of cellular response to stress,…	--	--
ENSSSCT00000033004	ENSSSCG00000006678	FCGR1A	chr4:108759132-108782557	9.21955	5.02129	0.876639	0.04065	0.407218	-	--	--	ssc05150,ssc04666,ssc04380,ssc05322,ssc05140,ssc05152,ssc05202,ssc04640,ssc04145	Staphylococcus aureus infection,Fc gamma R-mediated phagocytosis,Osteoclast differentiation,Systemic lupus erythematosus,Leishmaniasis,Tuberculosis,Transcriptional misregulation in cancer,Hematopoietic cell lineage,Phagosome
ENSSSCT00000016440	ENSSSCG00000015074	SIDT2	chr9:49613081-49629040	2.8625	2.20985	0.373323	0.04015	0.404586	SID1 transmembrane family member 2 [Source:HGNC Symbol;Acc:HGNC:24272]	GO:0010033,GO:0071310,GO:0065008,GO:0042592,GO:0070887,GO:0044424,GO:0005622,GO:0043231,GO:0043229,GO:0043227,GO:0051649,GO:0048513,GO:0009888,GO:0043226,GO:0005737,GO:0046903,GO:0032879,GO:0051641,GO:0032940,GO:0044444,GO:0008283,GO:0005575,GO:0009743,GO:0009746,GO:0009749,GO:0034284,GO:0051046,GO:1901700,GO:0033500,GO:0042593,GO:0030154,GO:1901701,GO:0044446,GO:0019725,GO:0048583,GO:0003001,GO:…	response to organic substance,cellular response to organic substance,regulation of biological quality,homeostatic process,cellular response to chemical stimulus,intracellular part,intracellular,intracellular membrane-bounded organelle,intracellular organelle,membrane-bounded organelle,establishment of localization in cell,organ development,tissue development,organelle,cytoplasm,secretion,regulati…	--	--
ENSSSCT00000029144	ENSSSCG00000024133	-	chr4:74259676-74275186	43.0901	34.6885	0.3129	0.02225	0.295726	--	--	--	--	--
ENSSSCT00000032961	ENSSSCG00000027806	SAMHD1	chr17:45607139-45611771	92.6866	66.0745	0.488268	0.0132	0.218269	-	--	--	--	--
ENSSSCT00000017210	ENSSSCG00000015803	-	chr15:53758511-53771282	28.8859	35.8502	-0.311618	0.03465	0.375166	--	--	--	--	--
ENSSSCT00000010657	ENSSSCG00000009720	DDX60	chr14:22292406-22365368	9.23091	0.863457	3.41828	5e-05	0.00318682	DEAD (Asp-Glu-Ala-Asp) box polypeptide 60 [Source:HGNC Symbol;Acc:HGNC:25942]	--	--	--	--
ENSSSCT00000015978	ENSSSCG00000014627	SMPD1	chr9:3961588-3964504	8.21381	6.23472	0.397725	0.0239	0.305587	sphingomyelin phosphodiesterase 1 [Source:HGNC Symbol;Acc:HGNC:11120]	--	--	ssc04142,ssc00600,ssc01100	Lysosome,Sphingolipid metabolism,Metabolic pathways
ENSSSCT00000023336	ENSSSCG00000021695	C11orf74	GL893649.1:33-17262	4.66762	8.40578	-0.848694	0.0368	0.386733	chromosome 11 open reading frame 74 [Source:HGNC Symbol;Acc:HGNC:25142]	--	--	--	--
ENSSSCT00000014049	ENSSSCG00000012853	IRF7	chr2:299389-333963	44.9671	13.0317	1.78684	0.00015	0.0082355	interferon regulatory factor 7 [Source:HGNC Symbol;Acc:HGNC:6122]	--	--	ssc05164,ssc04623,ssc05162,ssc04622,ssc05160,ssc05168,ssc04620,ssc05161,ssc05203	Influenza A,Cytosolic DNA-sensing pathway,Measles,RIG-I-like receptor signaling pathway,Hepatitis C,Herpes simplex infection,Toll-like receptor signaling pathway,Hepatitis B,Viral carcinogenesis
ENSSSCT00000022686	ENSSSCG00000026798	CYP2C42	chr14:116299373-116337991	1.14348	0.564026	1.0196	5e-05	0.00318682	-	--	--	ssc00140,ssc00591,ssc04750,ssc00830,ssc05204,ssc00590,ssc04726,ssc01100	Steroid hormone biosynthesis,Linoleic acid metabolism,Inflammatory mediator regulation of TRP channels,Retinol metabolism,Chemical carcinogenesis,Arachidonic acid metabolism,Serotonergic synapse,Metabolic pathways
ENSSSCT00000013405	ENSSSCG00000012258	FUNDC1	chrX:44109887-44121368	46.7098	34.3883	0.441809	0.00175	0.0561344	FUN14 domain containing 1 [Source:HGNC Symbol;Acc:HGNC:28746]	--	--	--	--
ENSSSCT00000014450	ENSSSCG00000013230	FAM180B	chr2:16204578-16206256	0.330335	1.08532	-1.71612	0.0194	0.27418	family with sequence similarity 180 member B [Source:HGNC Symbol;Acc:HGNC:34451]	--	--	--	--
ENSSSCT00000003338	ENSSSCG00000003005	AXL	chr6:44980554-44989676	41.052	32.9277	0.31815	0.0269	0.326701	AXL receptor tyrosine kinase [Source:HGNC Symbol;Acc:HGNC:905]	--	--	--	--
ENSSSCT00000025242	ENSSSCG00000026556	-	chr9:109717446-109719222	9.86458	16.2551	-0.720562	0.041	0.409216	--	--	--	ssc04360	Axon guidance
ENSSSCT00000028383	ENSSSCG00000021777	-	chr2:50496892-50513253	9.14651	7.06887	0.371741	0.04855	0.444829	--	--	--	--	--
ENSSSCT00000013571	ENSSSCG00000012411	PHKA1	chrX:66183817-66288138	1.04052	2.93301	-1.49508	0.0015	0.0500542	phosphorylase kinase, alpha 1 (muscle) [Source:HGNC Symbol;Acc:HGNC:8925]	--	--	ssc04910,ssc04020	Insulin signaling pathway,Calcium signaling pathway
ENSSSCT00000013570	ENSSSCG00000012410	-	chrX:66077056-66108914	3.05659	5.25532	-0.781855	0.0137	0.223454	--	--	--	ssc05203,ssc05034	Viral carcinogenesis,Alcoholism
ENSSSCT00000002743	ENSSSCG00000002471	ISG12(A)	chr7:122215477-122220545	96.9027	32.7329	1.56579	5e-05	0.00318682	interferon, alpha-inducible protein 27 [Source:HGNC Symbol;Acc:HGNC:5397]	--	--	--	--
ENSSSCT00000006534	ENSSSCG00000005951	-	chr4:8528270-8536618	3.577	5.49429	-0.61918	0.01915	0.272135	--	--	--	--	--
ENSSSCT00000016615	ENSSSCG00000015246	ST14	chr9:63159459-63176946	29.9973	23.81	0.333269	0.02405	0.306565	suppression of tumorigenicity 14 [Source:HGNC Symbol;Acc:HGNC:11344]	--	--	ssc05206	MicroRNAs in cancer
ENSSSCT00000016612	ENSSSCG00000015243	PRDM10	chr9:62880783-62960253	2.23251	1.58417	0.494938	0.0206	0.28399	PR domain containing 10 [Source:HGNC Symbol;Acc:HGNC:13995]	--	--	--	--
ENSSSCT00000018727	ENSSSCG00000017202	-	chr12:5578731-5582155	294.803	237.975	0.30894	0.03475	0.375731	--	--	--	ssc05202,ssc05034,ssc05322	Transcriptional misregulation in cancer,Alcoholism,Systemic lupus erythematosus
ENSSSCT00000017988	ENSSSCG00000016520	CREB3L2	chr18:12205294-12332432	4.85058	3.49868	0.471348	0.0179	0.261858	cAMP responsive element binding protein 3-like 2 [Source:HGNC Symbol;Acc:HGNC:23720]	GO:0006950,GO:0010033,GO:0071310,GO:0035497,GO:0044428,GO:0070887,GO:0043231,GO:0005634,GO:0043229,GO:0005783,GO:0048513,GO:0031981,GO:0005654,GO:0070013,GO:0043233,GO:0005488,GO:0031974,GO:0044444,GO:0044424,GO:0005737,GO:0030968,GO:0034620,GO:0033554,GO:0006986,GO:0035967,GO:0043227,GO:0043226,GO:0035966,GO:0005622,GO:0048193,GO:0006984,GO:0006888,GO:0002062,GO:0003676,GO:0034976,GO:0050896,GO:…	response to stress,response to organic substance,cellular response to organic substance,cAMP response element binding,nuclear part,cellular response to chemical stimulus,intracellular membrane-bounded organelle,nucleus,intracellular organelle,endoplasmic reticulum,organ development,nuclear lumen,nucleoplasm,intracellular organelle lumen,organelle lumen,binding,membrane-enclosed lumen,cytoplasmic …	ssc04916,ssc05031,ssc05161,ssc05203,ssc04725,ssc04668,ssc04728,ssc05034,ssc05030,ssc04911,ssc04915,ssc04261,ssc04918,ssc04022,ssc05215,ssc05016,ssc04962,ssc04024,ssc04152,ssc04151	Melanogenesis,Amphetamine addiction,Hepatitis B,Viral carcinogenesis,Cholinergic synapse,TNF signaling pathway,Dopaminergic synapse,Alcoholism,Cocaine addiction,Insulin secretion,Estrogen signaling pathway,Adrenergic signaling in cardiomyocytes,Thyroid hormone synthesis,cGMP-PKG signaling pathway,Prostate cancer,Huntington's disease,Vasopressin-regulated water reabsorption,cAMP signaling pathway,…
ENSSSCT00000000428	ENSSSCG00000000396	STAT2	chr5:23280620-23294700	107.633	81.0937	0.408463	0.0024	0.0708868	signal transducer and activator of transcription 2 [Source:RefSeq peptide;Acc:NP_999054]	--	--	ssc05164,ssc05160,ssc05168,ssc05162,ssc05161,ssc04062,ssc04630,ssc04380	Influenza A,Hepatitis C,Herpes simplex infection,Measles,Hepatitis B,Chemokine signaling pathway,Jak-STAT signaling pathway,Osteoclast differentiation
ENSSSCT00000031155	ENSSSCG00000025233	-	chr3:90333167-90336056	6.50458	4.63069	0.490228	0.016	0.245825	--	--	--	ssc03018,ssc00240,ssc00230	RNA degradation,Pyrimidine metabolism,Purine metabolism
ENSSSCT00000022347	ENSSSCG00000026454	PMAIP1	chr1:178852778-178857414	59.2783	47.6873	0.3139	0.0253	0.315378	phorbol-12-myristate-13-acetate-induced protein 1 [Source:HGNC Symbol;Acc:HGNC:9108]	--	--	ssc05203,ssc04115	Viral carcinogenesis,p53 signaling pathway
ENSSSCT00000023769	ENSSSCG00000021766	-	GL896000.1:6983-16745	216.372	70.2884	1.62216	5e-05	0.00318682	--	--	--	ssc04120	Ubiquitin mediated proteolysis
ENSSSCT00000017041	ENSSSCG00000015645	SRGAP2	chr9:73081672-73360178	17.6116	14.3113	0.299373	0.0374	0.389827	SLIT-ROBO Rho GTPase activating protein 2 [Source:HGNC Symbol;Acc:HGNC:19751]	--	--	ssc04360	Axon guidance
ENSSSCT00000017049	ENSSSCG00000015652	IL10	chr9:73757703-73762351	2.11197	1.21865	0.793308	0.01565	0.2426	interleukin 10 [Source:HGNC Symbol;Acc:HGNC:5962]	--	--	ssc05133,ssc05144,ssc05152,ssc05143,ssc04060,ssc05142,ssc04630,ssc05140,ssc05150,ssc04660,ssc05322,ssc05145,ssc04068,ssc05169,ssc05330,ssc05320,ssc04672,ssc05321,ssc05310,ssc05146	Pertussis,Malaria,Tuberculosis,African trypanosomiasis,Cytokine-cytokine receptor interaction,Chagas disease (American trypanosomiasis),Jak-STAT signaling pathway,Leishmaniasis,Staphylococcus aureus infection,T cell receptor signaling pathway,Systemic lupus erythematosus,Toxoplasmosis,FoxO signaling pathway,Epstein-Barr virus infection,Allograft rejection,Autoimmune thyroid disease,Intestinal imm…
ENSSSCT00000011531	ENSSSCG00000010540	ENTPD7	chr14:120274037-120318041	45.4406	33.2842	0.449144	0.0019	0.059695	ectonucleoside triphosphate diphosphohydrolase 7 [Source:HGNC Symbol;Acc:HGNC:19745]	--	--	--	--
ENSSSCT00000001630	ENSSSCG00000020893	TAP1	chr7:29429374-29444130	17.3992	10.3684	0.746829	0.0001	0.00583627	-	--	--	ssc05168,ssc02010,ssc04612,ssc05340,ssc04145	Herpes simplex infection,ABC transporters,Antigen processing and presentation,Primary immunodeficiency,Phagosome
ENSSSCT00000023149	ENSSSCG00000027575	RELB	GL896335.1:19201-34925	18.2219	14.6301	0.316729	0.04805	0.442541	v-rel avian reticuloendotheliosis viral oncogene homolog B [Source:HGNC Symbol;Acc:HGNC:9956]	--	--	ssc04380,ssc04064,ssc05169,ssc04010,ssc05166	Osteoclast differentiation,NF-kappa B signaling pathway,Epstein-Barr virus infection,MAPK signaling pathway,HTLV-I infection
ENSSSCT00000024771	ENSSSCG00000020886	-	chr12:54343359-54345103	5.65936	3.23466	0.807026	0.00315	0.0860127	--	--	--	--	--
ENSSSCT00000032267	ENSSSCG00000022408	-	chr6:71614913-71632568	25.5704	19.071	0.423096	0.00285	0.0801538	--	--	--	--	--
ENSSSCT00000026215	ENSSSCG00000022204	-	chr6:57851224-57880810	2.56726	0.752907	1.76969	5e-05	0.00318682	--	--	--	ssc04512	ECM-receptor interaction
ENSSSCT00000016185	ENSSSCG00000014833	UCP2	chr9:9147992-9155011	69.8921	57.7377	0.275617	0.04995	0.450932	uncoupling protein 2 (mitochondrial, proton carrier) [Source:HGNC Symbol;Acc:HGNC:12518]	--	--	--	--
ENSSSCT00000009623	ENSSSCG00000008796	RBM47	chr8:33176870-33190523	34.9188	28.1635	0.310176	0.0334	0.368119	RNA binding motif protein 47 [Source:HGNC Symbol;Acc:HGNC:30358]	GO:0002376,GO:0030097,GO:0044424,GO:0003723,GO:0002520,GO:0048534,GO:0005622,GO:0043231,GO:0043229,GO:0043227,GO:0005515,GO:0048513,GO:0043226,GO:0005634,GO:0090304,GO:0003676,GO:0005575,GO:0016070,GO:0097159,GO:1901363,GO:0043170,GO:0044260,GO:0030154,GO:1901360,GO:0005488,GO:0000166,GO:1901265,GO:0071704,GO:0034641,GO:0048869,GO:0044238,GO:0007275,GO:0036094,GO:0048731,GO:0044767,GO:0006139,GO:…	immune system process,hemopoiesis,intracellular part,RNA binding,immune system development,hematopoietic or lymphoid organ development,intracellular,intracellular membrane-bounded organelle,intracellular organelle,membrane-bounded organelle,protein binding,organ development,organelle,nucleus,nucleic acid metabolic process,nucleic acid binding,cellular_component,RNA metabolic process,organic cycli…	--	--
ENSSSCT00000003478	ENSSSCG00000003137	PLEKHA4	chr6:49891577-49917064	11.4979	6.56211	0.809139	5e-05	0.00318682	pleckstrin homology domain containing A4 [Source:HGNC Symbol;Acc:HGNC:14339]	--	--	--	--
ENSSSCT00000022539	ENSSSCG00000023825	-	chr4:8546060-8556796	2.2294	3.41144	-0.613726	0.00695	0.147327	--	--	--	--	--
ENSSSCT00000018544	ENSSSCG00000017032	-	chr16:68455356-68462962	2.35865	1.41849	0.733602	0.03755	0.390712	--	--	--	ssc05166,ssc04114,ssc04110	HTLV-I infection,Oocyte meiosis,Cell cycle
ENSSSCT00000026941	ENSSSCG00000023304	SRRM2	chr3:40613486-40631943	10.1155	7.88985	0.358504	0.01405	0.226958	serine/arginine repetitive matrix 2 [Source:HGNC Symbol;Acc:HGNC:16639]	GO:0044428,GO:0070742,GO:0043231,GO:0005634,GO:0043229,GO:0015030,GO:0031981,GO:0005654,GO:0016604,GO:0005515,GO:0070013,GO:0043233,GO:0005488,GO:0031974,GO:0044424,GO:0043227,GO:0043226,GO:0005622,GO:0047485,GO:0044451,GO:0016607,GO:0044446,GO:0019904,GO:0044422,GO:0071013,GO:0003674,GO:0005681,GO:0044464,GO:0005623,GO:0005575,GO:0030529,GO:0032991	nuclear part,C2H2 zinc finger domain binding,intracellular membrane-bounded organelle,nucleus,intracellular organelle,Cajal body,nuclear lumen,nucleoplasm,nuclear body,protein binding,intracellular organelle lumen,organelle lumen,binding,membrane-enclosed lumen,intracellular part,membrane-bounded organelle,organelle,intracellular,protein N-terminus binding,nucleoplasm part,nuclear speck,intracell…	--	--
ENSSSCT00000027013	ENSSSCG00000021717	SUV39H1	GL896213.1:5446-15425	0.212296	0.487846	-1.20035	0.04375	0.422754	suppressor of variegation 3-9 homolog 1 [Source:HGNC Symbol;Acc:HGNC:11479]	GO:0006950,GO:0070887,GO:0042221,GO:0050896,GO:0048523,GO:0048519,GO:0001666,GO:0036293,GO:0070482,GO:0016278,GO:0016279,GO:0018024,GO:0051716,GO:0033553,GO:0046974,GO:0003824,GO:0042054,GO:0044424,GO:0047485,GO:0006974,GO:0034968,GO:0033554,GO:0005515,GO:0000183,GO:0005677,GO:0008276,GO:0043412,GO:0005634,GO:0005694,GO:0005622,GO:0006464,GO:0036211,GO:0016571,GO:0043227,GO:0008170,GO:0016569,GO:…	response to stress,cellular response to chemical stimulus,response to chemical stimulus,response to stimulus,negative regulation of cellular process,negative regulation of biological process,response to hypoxia,response to decreased oxygen levels,response to oxygen levels,lysine N-methyltransferase activity,protein-lysine N-methyltransferase activity,histone-lysine N-methyltransferase activity,ce…	--	--
ENSSSCT00000024093	ENSSSCG00000025724	-	chr1:154562564-154575916	4.58447	2.20823	1.05386	0.0037	0.095487	--	--	--	--	--
ENSSSCT00000035898	ENSSSCG00000010451	IFIT2	chr14:110179711-110190465	74.4823	13.4601	2.46821	5e-05	0.00318682	interferon induced protein with tetratricopeptide repeats 2 [Source:HGNC Symbol;Acc:HGNC:5409]	GO:0009615,GO:0051607,GO:0002252,GO:0034340,GO:0051707,GO:0009607,GO:0071357,GO:0045087,GO:0051704,GO:0035455,GO:0006952,GO:0034097,GO:0060337,GO:0035457,GO:0010033,GO:0006950,GO:0071310,GO:0071345,GO:0006955,GO:0002376,GO:0070887,GO:0042802,GO:0042221,GO:0019221,GO:0003723,GO:0005829,GO:0005622,GO:0044424,GO:0032091,GO:0005737,GO:0044092,GO:0050896,GO:0043229,GO:0042981,GO:0043067,GO:0051100,GO:…	response to virus,defense response to virus,immune effector process,response to type I interferon,response to other organism,response to biotic stimulus,cellular response to type I interferon,innate immune response,multi-organism process,response to interferon-alpha,defense response,response to cytokine stimulus,type I interferon-mediated signaling pathway,cellular response to interferon-alpha,re…	--	--
ENSSSCT00000024635	ENSSSCG00000022880	-	chr3:90359456-90371028	26.6354	17.7821	0.582914	0.00125	0.0437374	--	--	--	ssc03018,ssc00240,ssc00230	RNA degradation,Pyrimidine metabolism,Purine metabolism
ENSSSCT00000027757	ENSSSCG00000028711	CASP1	chr9:39209730-39222235	40.3648	30.063	0.425109	0.0051	0.119294	caspase-1 [Source:RefSeq peptide;Acc:NP_999327]	--	--	ssc05164,ssc04623,ssc05133,ssc05014,ssc05132,ssc05134,ssc04621	Influenza A,Cytosolic DNA-sensing pathway,Pertussis,Amyotrophic lateral sclerosis (ALS),Salmonella infection,Legionellosis,NOD-like receptor signaling pathway
ENSSSCT00000023697	ENSSSCG00000028589	-	chr13:155488759-155515437	1.01135	1.67866	-0.731018	0.041	0.409216	--	--	--	--	--
ENSSSCT00000005365	ENSSSCG00000004859	ZNF516	chr1:163898658-163953127	4.08984	3.15815	0.372964	0.03785	0.392377	zinc finger protein 516 [Source:HGNC Symbol;Acc:HGNC:28990]	--	--	--	--
ENSSSCT00000025122	ENSSSCG00000026990	FAM162A	chr13:147726442-147762654	54.7082	67.6167	-0.305623	0.04795	0.442164	family with sequence similarity 162 member A [Source:HGNC Symbol;Acc:HGNC:17865]	--	--	--	--
ENSSSCT00000004964	ENSSSCG00000004493	SIGLEC15	chr1:105543763-105549486	0.878925	1.72075	-0.969222	0.0137	0.223454	sialic acid binding Ig-like lectin 15 [Source:HGNC Symbol;Acc:HGNC:27596]	--	--	--	--
ENSSSCT00000007436	ENSSSCG00000006788	ADORA3	chr4:118996433-119053012	1.17139	0.749254	0.644689	0.02845	0.337011	adenosine A3 receptor [Source:HGNC Symbol;Acc:HGNC:268]	--	--	ssc04022,ssc04080	cGMP-PKG signaling pathway,Neuroactive ligand-receptor interaction
ENSSSCT00000036290	ENSSSCG00000030839	JUN	chr6:141230120-141233597	108.581	77.8882	0.479301	0.00045	0.0200341	jun proto-oncogene [Source:HGNC Symbol;Acc:HGNC:6204]	--	--	ssc05164,ssc05168,ssc04620,ssc05323,ssc04380,ssc05133,ssc05142,ssc05161,ssc04668,ssc05140,ssc05132,ssc05210,ssc05321,ssc05203,ssc04660,ssc05211,ssc04012,ssc04662,ssc05169,ssc04915,ssc04010,ssc05031,ssc05200,ssc04932,ssc04722,ssc05030,ssc04921,ssc04912,ssc04024,ssc05166,ssc04510,ssc04310	Influenza A,Herpes simplex infection,Toll-like receptor signaling pathway,Rheumatoid arthritis,Osteoclast differentiation,Pertussis,Chagas disease (American trypanosomiasis),Hepatitis B,TNF signaling pathway,Leishmaniasis,Salmonella infection,Colorectal cancer,Inflammatory bowel disease (IBD),Viral carcinogenesis,T cell receptor signaling pathway,Renal cell carcinoma,ErbB signaling pathway,B cell…
ENSSSCT00000026579	ENSSSCG00000011467	DENND6A	chr13:43385840-43444265	2.28236	5.11831	-1.16514	0.0231	0.30122	DENN/MADD domain containing 6A [Source:HGNC Symbol;Acc:HGNC:26635]	--	--	--	--
ENSSSCT00000033540	ENSSSCG00000011393	UBA7	chr13:35509776-35520887	22.5671	8.64428	1.3844	5e-05	0.00318682	ubiquitin-like modifier activating enzyme 7 [Source:HGNC Symbol;Acc:HGNC:12471]	--	--	ssc04120,ssc05012	Ubiquitin mediated proteolysis,Parkinson's disease
ENSSSCT00000015484	ENSSSCG00000014172	ERAP2	chr2:107271122-107294215	21.5667	16.8542	0.355697	0.01775	0.260476	endoplasmic reticulum aminopeptidase 2 [Source:HGNC Symbol;Acc:HGNC:29499]	--	--	--	--
ENSSSCT00000031058	ENSSSCG00000026007	-	chr9:53693576-53825971	17.351	11.4555	0.598973	5e-05	0.00318682	--	--	--	--	--
ENSSSCT00000031056	ENSSSCG00000024754	-	chr18:43984661-44336212	1.39036	2.06334	-0.569523	0.03055	0.350668	--	GO:0044424,GO:0048646,GO:0048856,GO:0032502,GO:0048869,GO:0044767,GO:0005622,GO:0043227,GO:0043231,GO:0043229,GO:0030030,GO:0043226,GO:0034464,GO:0005575,GO:0032989,GO:0044763,GO:0042995,GO:0044699,GO:0008150,GO:0005623,GO:0048858,GO:0000902,GO:0032990,GO:0009987,GO:0010927,GO:0030031,GO:0044464,GO:0009653,GO:0070925,GO:0022607,GO:0006996,GO:0016043,GO:0042384,GO:0044085,GO:0044782,GO:0060271,GO:…	intracellular part,anatomical structure formation involved in morphogenesis,anatomical structure development,developmental process,cellular developmental process,single-organism developmental process,intracellular,membrane-bounded organelle,intracellular membrane-bounded organelle,intracellular organelle,cell projection organization,organelle,BBSome,cellular_component,cellular component morphogen…	--	--
ENSSSCT00000025711	ENSSSCG00000020906	TNFSF10	chr13:119874406-119883953	44.223	22.6966	0.962317	5e-05	0.00318682	tumor necrosis factor superfamily member 10 [Source:HGNC Symbol;Acc:HGNC:11925]	--	--	ssc05164,ssc05162,ssc04650,ssc04060,ssc04068,ssc04210	Influenza A,Measles,Natural killer cell mediated cytotoxicity,Cytokine-cytokine receptor interaction,FoxO signaling pathway,Apoptosis
ENSSSCT00000032569	ENSSSCG00000027790	-	chr13:108078841-108090547	1.14398	1.68113	-0.555364	0.02385	0.305237	--	--	--	--	--
ENSSSCT00000010460	ENSSSCG00000009542	TNFSF13B	chr11:83014417-83046597	39.9374	29.4645	0.43876	0.0207	0.284715	tumor necrosis factor superfamily member 13b [Source:HGNC Symbol;Acc:HGNC:11929]	GO:0002376,GO:0006955,GO:0005515,GO:0005622,GO:0044424,GO:0005737,GO:0005488,GO:0044464,GO:0005623,GO:0005164,GO:0005126,GO:0003674,GO:0044444,GO:0005575,GO:0032813,GO:0050896,GO:0008150,GO:0048471,GO:0005102,GO:0044425,GO:0016020,GO:0016021,GO:0031224	immune system process,immune response,protein binding,intracellular,intracellular part,cytoplasm,binding,cell part,cell,tumor necrosis factor receptor binding,cytokine receptor binding,molecular_function,cytoplasmic part,cellular_component,tumor necrosis factor receptor superfamily binding,response to stimulus,biological_process,perinuclear region of cytoplasm,receptor binding,membrane part,membr…	ssc04064,ssc04060,ssc05323,ssc04672	NF-kappa B signaling pathway,Cytokine-cytokine receptor interaction,Rheumatoid arthritis,Intestinal immune network for IgA production
ENSSSCT00000013346	ENSSSCG00000012201	CXorf21	chrX:28635265-28651197	18.525	13.8808	0.416385	0.0128	0.214117	chromosome X open reading frame 21 [Source:HGNC Symbol;Acc:HGNC:25667]	--	--	--	--
ENSSSCT00000033889	ENSSSCG00000010772	ADAM8	chr14:153183590-153194302	26.5128	20.2589	0.388135	0.01245	0.210442	ADAM metallopeptidase domain 8 [Source:HGNC Symbol;Acc:HGNC:215]	--	--	--	--
ENSSSCT00000016378	ENSSSCG00000015014	ZC3H12C	chr9:42847518-42912936	42.4195	34.3331	0.305126	0.02805	0.334309	zinc finger CCCH-type containing 12C [Source:HGNC Symbol;Acc:HGNC:29362]	--	--	--	--
ENSSSCT00000016373	ENSSSCG00000015009	KDELC2	chr9:41043563-41065077	14.4768	10.7932	0.42362	0.01035	0.187077	KDEL motif containing 2 [Source:HGNC Symbol;Acc:HGNC:28496]	--	--	--	--
ENSSSCT00000007577	ENSSSCG00000022397	-	chr4:139458144-139473151	0.535544	0.21062	1.34636	0.0043	0.105867	--	--	--	--	--
ENSSSCT00000007579	ENSSSCG00000006919	GBP4	chr4:139582094-139601161	5.34839	2.27022	1.23627	5e-05	0.00318682	-	--	--	--	--
ENSSSCT00000027305	ENSSSCG00000025588	FJX1	chr2:27784533-27785847	243.772	201.601	0.274027	0.04395	0.423668	four jointed box 1 [Source:HGNC Symbol;Acc:HGNC:17166]	--	--	--	--
ENSSSCT00000033934	ENSSSCG00000030857	LENG8	chr6:53415467-53420921	11.8896	9.10838	0.384437	0.02245	0.297318	-	--	--	--	--
ENSSSCT00000010703	ENSSSCG00000009761	-	chr14:30320577-30514756	3.96726	3.15876	0.328781	0.0371	0.388143	nuclear receptor corepressor 2 [Source:RefSeq peptide;Acc:NP_001038041]	--	--	ssc04330,ssc05169	Notch signaling pathway,Epstein-Barr virus infection
ENSSSCT00000007316	ENSSSCG00000006678	FCGR1A	chr4:108759132-108782557	35.0561	19.2676	0.863491	5e-05	0.00318682	-	--	--	ssc05150,ssc04666,ssc04380,ssc05322,ssc05140,ssc05152,ssc05202,ssc04640,ssc04145	Staphylococcus aureus infection,Fc gamma R-mediated phagocytosis,Osteoclast differentiation,Systemic lupus erythematosus,Leishmaniasis,Tuberculosis,Transcriptional misregulation in cancer,Hematopoietic cell lineage,Phagosome
ENSSSCT00000004560	ENSSSCG00000004125	STX11	chr1:23480021-23510485	67.5599	53.7369	0.330253	0.01725	0.257063	syntaxin 11 [Source:HGNC Symbol;Acc:HGNC:11429]	--	--	ssc04130	SNARE interactions in vesicular transport
ENSSSCT00000002240	ENSSSCG00000002002	IRF9	chr7:80404982-80410952	43.0205	29.4366	0.547414	0.0002	0.0104635	interferon regulatory factor 9 [Source:HGNC Symbol;Acc:HGNC:6131]	--	--	ssc05164,ssc05160,ssc05168,ssc05162,ssc04630,ssc04380,ssc05203	Influenza A,Hepatitis C,Herpes simplex infection,Measles,Jak-STAT signaling pathway,Osteoclast differentiation,Viral carcinogenesis
ENSSSCT00000006892	ENSSSCG00000006289	F5	chr4:89027935-89109573	7.03043	5.32567	0.400651	0.0114	0.199013	coagulation factor V (proaccelerin, labile factor) [Source:HGNC Symbol;Acc:HGNC:3542]	GO:0065008,GO:0044424,GO:0006950,GO:0005622,GO:0043231,GO:0043229,GO:0043227,GO:0005515,GO:0043226,GO:0005737,GO:0044444,GO:0005575,GO:0005488,GO:0065007,GO:0005623,GO:0046914,GO:0003013,GO:0008015,GO:0009611,GO:0044464,GO:0042060,GO:0031091,GO:0050896,GO:0007599,GO:0050878,GO:0005615,GO:0016020,GO:0043167,GO:0005507,GO:0043169,GO:0007596,GO:0050817,GO:0046872,GO:0031410,GO:0016023,GO:0044421,GO:…	regulation of biological quality,intracellular part,response to stress,intracellular,intracellular membrane-bounded organelle,intracellular organelle,membrane-bounded organelle,protein binding,organelle,cytoplasm,cytoplasmic part,cellular_component,binding,biological regulation,cell,transition metal ion binding,circulatory system process,blood circulation,response to wounding,cell part,wound heal…	ssc04610	Complement and coagulation cascades
ENSSSCT00000026775	ENSSSCG00000030408	DDX58	chr10:38145073-38192181	55.5002	17.049	1.7028	5e-05	0.00318682	probable ATP-dependent RNA helicase DDX58 [Source:RefSeq peptide;Acc:NP_998969]	--	--	ssc05164,ssc04623,ssc05162,ssc04622,ssc05160,ssc05168,ssc05169,ssc05161,ssc04064	Influenza A,Cytosolic DNA-sensing pathway,Measles,RIG-I-like receptor signaling pathway,Hepatitis C,Herpes simplex infection,Epstein-Barr virus infection,Hepatitis B,NF-kappa B signaling pathway
ENSSSCT00000034521	ENSSSCG00000003395	CH242-402I11.1	chr6:64031604-64091057	9.47531	6.62259	0.516778	0.00105	0.0383399	-	--	--	ssc04620,ssc04062,ssc05164,ssc05162,ssc05161,ssc04380,ssc05160,ssc05142,ssc05221,ssc04210,ssc05210,ssc05200,ssc05220,ssc04668,ssc05145,ssc05215,ssc05212,ssc05205,ssc04014,ssc04660,ssc05211,ssc05213,ssc04917,ssc05166,ssc04932,ssc04630,ssc04666,ssc05100,ssc04810,ssc04015,ssc04611,ssc04152,ssc05203,ssc04662,ssc04919,ssc04510,ssc00562,ssc04650,ssc05222,ssc04070,ssc04024,ssc05218,ssc04750,ssc04921,ssc…	Toll-like receptor signaling pathway,Chemokine signaling pathway,Influenza A,Measles,Hepatitis B,Osteoclast differentiation,Hepatitis C,Chagas disease (American trypanosomiasis),Acute myeloid leukemia,Apoptosis,Colorectal cancer,Pathways in cancer,Chronic myeloid leukemia,TNF signaling pathway,Toxoplasmosis,Prostate cancer,Pancreatic cancer,Proteoglycans in cancer,Ras signaling pathway,T cell rec…
ENSSSCT00000017138	ENSSSCG00000015738	-	chr15:36045462-36051320	5.54075	8.22813	-0.570482	0.0301	0.347793	--	--	--	--	--
ENSSSCT00000016661	ENSSSCG00000015290	CDK18	chr9:72428183-72431694	5.3497	3.14971	0.764237	0.0087	0.169029	cyclin-dependent kinase 18 [Source:HGNC Symbol;Acc:HGNC:8751]	--	--	--	--
ENSSSCT00000009196	ENSSSCG00000008399	-	chr3:90413972-90422822	24.455	15.1135	0.694289	0.0001	0.00583627	--	--	--	ssc00240,ssc03018,ssc00230	Pyrimidine metabolism,RNA degradation,Purine metabolism
ENSSSCT00000000457	ENSSSCG00000000423	-	chr5:24316943-24353178	11.4244	8.99085	0.345593	0.04835	0.44395	--	--	--	ssc05144,ssc05010	Malaria,Alzheimer's disease
ENSSSCT00000008861	ENSSSCG00000008088	IL1B1	chr3:45319295-45326307	47.0264	35.1399	0.420358	0.0081	0.161777	Interleukin-1 beta [Source:UniProtKB/Swiss-Prot;Acc:P26889]	--	--	ssc05133,ssc04623,ssc04620,ssc05134,ssc04621,ssc05164,ssc05168,ssc05132,ssc05162,ssc04064,ssc05140,ssc05152,ssc04380,ssc05142,ssc05323,ssc04210,ssc04640,ssc05144,ssc04668,ssc05321,ssc04060,ssc04932,ssc05143,ssc05332,ssc05010,ssc04940,ssc04750,ssc05020,ssc04010,ssc05146	Pertussis,Cytosolic DNA-sensing pathway,Toll-like receptor signaling pathway,Legionellosis,NOD-like receptor signaling pathway,Influenza A,Herpes simplex infection,Salmonella infection,Measles,NF-kappa B signaling pathway,Leishmaniasis,Tuberculosis,Osteoclast differentiation,Chagas disease (American trypanosomiasis),Rheumatoid arthritis,Apoptosis,Hematopoietic cell lineage,Malaria,TNF signaling p…
ENSSSCT00000008863	ENSSSCG00000008090	IL1A	chr3:45453544-45466239	229.56	158.65	0.533022	0.00115	0.0410868	interleukin 1 alpha [Source:HGNC Symbol;Acc:HGNC:5991]	--	--	ssc05133,ssc05164,ssc05132,ssc05162,ssc05140,ssc05152,ssc04380,ssc05323,ssc04210,ssc04640,ssc05321,ssc04060,ssc04932,ssc05332,ssc04940,ssc05020,ssc04010	Pertussis,Influenza A,Salmonella infection,Measles,Leishmaniasis,Tuberculosis,Osteoclast differentiation,Rheumatoid arthritis,Apoptosis,Hematopoietic cell lineage,Inflammatory bowel disease (IBD),Cytokine-cytokine receptor interaction,Non-alcoholic fatty liver disease (NAFLD),Graft-versus-host disease,Type I diabetes mellitus,Prion diseases,MAPK signaling pathway
ENSSSCT00000011849	ENSSSCG00000010831	DUSP10	chr10:12977460-13015992	0.468301	0.237422	0.979983	0.01115	0.196234	dual specificity phosphatase 10 [Source:HGNC Symbol;Acc:HGNC:3065]	GO:0002252,GO:0006952,GO:0002376,GO:0051707,GO:0009607,GO:0005737,GO:0006950,GO:0044424,GO:0045444,GO:0045087,GO:0006955,GO:0005622,GO:0043227,GO:0010033,GO:0051241,GO:0080134,GO:0043226,GO:0045598,GO:0031347,GO:0043231,GO:0044446,GO:0043229,GO:0051704,GO:0044422,GO:0002682,GO:0071704,GO:0044444,GO:0009605,GO:0044237,GO:0032268,GO:0070013,GO:0043233,GO:0002698,GO:0048519,GO:0010605,GO:0031974,GO:…	immune effector process,defense response,immune system process,response to other organism,response to biotic stimulus,cytoplasm,response to stress,intracellular part,fat cell differentiation,innate immune response,immune response,intracellular,membrane-bounded organelle,response to organic substance,negative regulation of multicellular organismal process,regulation of response to stress,organelle…	ssc04010	MAPK signaling pathway
ENSSSCT00000003361	ENSSSCG00000003030	CIC	chr6:45533316-45547304	4.50625	3.60284	0.322789	0.0452	0.428876	capicua transcriptional repressor [Source:HGNC Symbol;Acc:HGNC:14214]	--	--	--	--
ENSSSCT00000007738	ENSSSCG00000007067	JAG1	chr17:22065795-22104506	18.6022	12.0595	0.625296	5e-05	0.00318682	jagged 1 [Source:HGNC Symbol;Acc:HGNC:6188]	--	--	ssc04330	Notch signaling pathway
ENSSSCT00000024748	ENSSSCG00000023302	-	GL895302.2:19252-21265	1.86555	0.568448	1.7145	0.00115	0.0410868	--	--	--	--	--
ENSSSCT00000022741	ENSSSCG00000026336	-	GL895302.2:7746-17312	17.092	4.13771	2.04642	5e-05	0.00318682	--	GO:0005488,GO:0003824,GO:0003676,GO:1901363,GO:0097159,GO:0003674,GO:0016787,GO:0036094,GO:0000166,GO:1901265,GO:0003677,GO:0035639,GO:0001883,GO:0032550,GO:0001882,GO:0032549,GO:0043168,GO:0032555,GO:0017076,GO:0032553,GO:0005524,GO:0032559,GO:0030554,GO:0043167	binding,catalytic activity,nucleic acid binding,heterocyclic compound binding,organic cyclic compound binding,molecular_function,hydrolase activity,small molecule binding,nucleotide binding,nucleoside phosphate binding,DNA binding,purine ribonucleoside triphosphate binding,purine nucleoside binding,purine ribonucleoside binding,nucleoside binding,ribonucleoside binding,anion binding,purine ribonu…	--	--
ENSSSCT00000022742	ENSSSCG00000024498	GEMIN7	GL892581.1:22011-22460	8.87682	3.70927	1.25891	0.0032	0.0869954	gem nuclear organelle associated protein 7 [Source:HGNC Symbol;Acc:HGNC:20045]	--	--	ssc03013	RNA transport
ENSSSCT00000018501	ENSSSCG00000016991	DUSP1	chr16:55768408-55771513	225.258	174.078	0.371839	0.00945	0.176555	dual specificity phosphatase 1 [Source:HGNC Symbol;Acc:HGNC:3064]	--	--	ssc04010	MAPK signaling pathway
ENSSSCT00000014095	ENSSSCG00000012893	-	chr2:3539586-3551073	80.2062	48.7241	0.719077	5e-05	0.00318682	--	--	--	--	--
ENSSSCT00000014092	ENSSSCG00000012890	TCIRG1	chr2:3476377-3488420	191.353	152.554	0.326916	0.02095	0.286746	T-cell, immune regulator 1, ATPase, H+ transporting, lysosomal V0 subunit A3 [Source:HGNC Symbol;Acc:HGNC:11647]	--	--	ssc00190,ssc05152,ssc04145,ssc05323,ssc04966,ssc04721,ssc04142,ssc01100	Oxidative phosphorylation,Tuberculosis,Phagosome,Rheumatoid arthritis,Collecting duct acid secretion,Synaptic vesicle cycle,Lysosome,Metabolic pathways
ENSSSCT00000004659	ENSSSCG00000004216	-	chr1:39565182-39593566	8.78162	11.308	-0.364789	0.02435	0.30874	--	--	--	ssc00640	Propanoate metabolism
ENSSSCT00000010120	ENSSSCG00000009240	PLAC8	chr8:144545690-144573889	0.73808	0.18124	2.02587	0.00735	0.152723	placenta specific 8 [Source:HGNC Symbol;Acc:HGNC:19254]	--	--	--	--
ENSSSCT00000017853	ENSSSCG00000016396	TNFAIP6	chr15:157132379-157151740	119.423	93.5692	0.351971	0.02455	0.3101	-	--	--	--	--
ENSSSCT00000005904	ENSSSCG00000005364	TDRD7	chr1:267342109-267425086	32.9559	27.1554	0.279298	0.04265	0.417859	tudor domain containing 7 [Source:HGNC Symbol;Acc:HGNC:30831]	--	--	--	--
ENSSSCT00000019264	ENSSSCG00000017698	CCL4	chr12:41048661-41049981	94.6566	51.0605	0.890496	0.0002	0.0104635	C-C motif chemokine 4 [Source:UniProtKB/Swiss-Prot;Acc:Q711P4]	--	--	ssc04623,ssc04620,ssc04062,ssc05132,ssc04064,ssc04060	Cytosolic DNA-sensing pathway,Toll-like receptor signaling pathway,Chemokine signaling pathway,Salmonella infection,NF-kappa B signaling pathway,Cytokine-cytokine receptor interaction
ENSSSCT00000019266	ENSSSCG00000017700	CCL3L1	chr12:41061350-41063253	193.701	134.725	0.523807	0.0023	0.0687507	-	--	--	ssc04062,ssc04620,ssc05323,ssc04060,ssc05142,ssc05132	Chemokine signaling pathway,Toll-like receptor signaling pathway,Rheumatoid arthritis,Cytokine-cytokine receptor interaction,Chagas disease (American trypanosomiasis),Salmonella infection
ENSSSCT00000012423	ENSSSCG00000011346	PLXNB1	chr13:34290452-34293027	1.89606	1.20568	0.653156	0.0206	0.28399	plexin B1 [Source:HGNC Symbol;Acc:HGNC:9103]	--	--	ssc04360	Axon guidance
ENSSSCT00000029122	ENSSSCG00000027372	SAMD9	chr9:79679835-79684587	171.663	102.153	0.74884	5e-05	0.00318682	sterile alpha motif domain containing 9 [Source:HGNC Symbol;Acc:HGNC:1348]	GO:0043231,GO:0043229,GO:0005515,GO:0005488,GO:0044424,GO:0005737,GO:0043227,GO:0043226,GO:0005622,GO:0003674,GO:0044464,GO:0005623,GO:0005575	intracellular membrane-bounded organelle,intracellular organelle,protein binding,binding,intracellular part,cytoplasm,membrane-bounded organelle,organelle,intracellular,molecular_function,cell part,cell,cellular_component	--	--
ENSSSCT00000001341	ENSSSCG00000001233	TRIM26	chr7:24795833-24820308	20.9983	13.0553	0.685634	5e-05	0.00318682	tripartite motif containing 26 [Source:HGNC Symbol;Acc:HGNC:12962]	--	--	--	--
ENSSSCT00000003874	ENSSSCG00000003488	-	chr6:71559862-71597809	25.7663	19.9475	0.369278	0.00755	0.155264	--	--	--	ssc05203	Viral carcinogenesis
ENSSSCT00000024200	ENSSSCG00000026182	-	chr1:296330289-296332085	43.9181	7.43349	2.5627	5e-05	0.00318682	--	--	--	--	--
ENSSSCT00000026546	ENSSSCG00000028523	HUS1	GL892265.1:21784-28710	27.4076	36.7223	-0.422082	0.0175	0.258911	HUS1 checkpoint clamp component [Source:HGNC Symbol;Acc:HGNC:5309]	--	--	--	--
ENSSSCT00000006177	ENSSSCG00000005617	STXBP1	chr1:302057982-302090174	8.70166	6.66132	0.385482	0.03075	0.351914	syntaxin binding protein 1 [Source:HGNC Symbol;Acc:HGNC:11444]	--	--	ssc04721	Synaptic vesicle cycle
ENSSSCT00000001682	ENSSSCG00000001509	DAXX	chr7:34180625-34184970	13.5093	10.0307	0.429522	0.00655	0.141725	death-domain associated protein [Source:HGNC Symbol;Acc:HGNC:2681]	--	--	ssc05168,ssc05014,ssc04010	Herpes simplex infection,Amyotrophic lateral sclerosis (ALS),MAPK signaling pathway
ENSSSCT00000000791	ENSSSCG00000000728	PARP11	chr5:68750884-68791407	8.04302	3.23608	1.31349	5e-05	0.00318682	poly(ADP-ribose) polymerase family member 11 [Source:HGNC Symbol;Acc:HGNC:1186]	--	--	--	--
ENSSSCT00000030088	ENSSSCG00000022533	-	chr1:35795800-35851239	15.9548	9.78205	0.705784	0.0001	0.00583627	--	--	--	--	--
ENSSSCT00000025476	ENSSSCG00000025971	-	chr12:31786973-31814799	0	3.01327	#NAME?	0.0001	0.00583627	--	--	--	--	--
ENSSSCT00000030027	ENSSSCG00000027894	FAM76A	chr6:78416216-78446670	50.8541	40.3956	0.332166	0.01435	0.230033	family with sequence similarity 76 member A [Source:HGNC Symbol;Acc:HGNC:28530]	--	--	--	--
ENSSSCT00000027518	ENSSSCG00000027580	-	GL896061.1:1630-4810	0.718457	0.410469	0.807627	0.019	0.270834	--	GO:0005515,GO:0003674,GO:0071822,GO:0044763,GO:0044699,GO:0008150,GO:0043933,GO:0009987,GO:0005488,GO:0030036,GO:0007015,GO:0030029,GO:0006996,GO:0016043,GO:0007010,GO:0071840,GO:0003779,GO:0008092	protein binding,molecular_function,protein complex subunit organization,single-organism cellular process,single-organism process,biological_process,macromolecular complex subunit organization,cellular process,binding,actin cytoskeleton organization,actin filament organization,actin filament-based process,organelle organization,cellular component organization,cytoskeleton organization,cellular com…	--	--
ENSSSCT00000025808	ENSSSCG00000028746	-	GL893669.1:913-6622	8.37577	5.38351	0.637675	0.01595	0.245347	--	--	--	--	--
ENSSSCT00000016913	ENSSSCG00000015525	TOR3A	chr9:132634648-132660669	18.3504	12.9412	0.503842	0.00585	0.131178	torsin family 3, member A [Source:HGNC Symbol;Acc:HGNC:11997]	GO:0044424,GO:0005622,GO:0043231,GO:0043229,GO:0043227,GO:0005515,GO:0043226,GO:0005737,GO:0005783,GO:0044444,GO:0005575,GO:0097159,GO:1901363,GO:0044446,GO:0005488,GO:0000166,GO:1901265,GO:0044422,GO:0036094,GO:0005623,GO:0044432,GO:0070013,GO:0043233,GO:0031974,GO:0044464,GO:0003824,GO:0032555,GO:0017076,GO:0032553,GO:0035639,GO:0001883,GO:0032550,GO:0005788,GO:0001882,GO:0032549,GO:0043167,GO:…	intracellular part,intracellular,intracellular membrane-bounded organelle,intracellular organelle,membrane-bounded organelle,protein binding,organelle,cytoplasm,endoplasmic reticulum,cytoplasmic part,cellular_component,organic cyclic compound binding,heterocyclic compound binding,intracellular organelle part,binding,nucleotide binding,nucleoside phosphate binding,organelle part,small molecule bin…	--	--
ENSSSCT00000029636	ENSSSCG00000027855	SOCS1	chr3:32671706-32672538	2.39319	1.32079	0.857541	0.0144	0.23054	suppressor of cytokine signaling 1 [Source:HGNC Symbol;Acc:HGNC:19383]	--	--	ssc04380,ssc05145,ssc04917,ssc04630,ssc04120,ssc05206,ssc04910,ssc04930	Osteoclast differentiation,Toxoplasmosis,Prolactin signaling pathway,Jak-STAT signaling pathway,Ubiquitin mediated proteolysis,MicroRNAs in cancer,Insulin signaling pathway,Type II diabetes mellitus
ENSSSCT00000009532	ENSSSCG00000008713	KIAA0232	chr8:3206689-3263005	25.3593	20.6912	0.2935	0.03215	0.360526	KIAA0232 [Source:HGNC Symbol;Acc:HGNC:28992]	GO:0005575,GO:0003674,GO:0008150	cellular_component,molecular_function,biological_process	--	--
ENSSSCT00000025392	ENSSSCG00000028543	-	GL894394.2:8852-31902	2.76409	3.99993	-0.533171	0.0466	0.435785	--	GO:0065008,GO:0042592,GO:0045454,GO:0005575,GO:0019725,GO:0065007,GO:0005623,GO:0050789,GO:0050794,GO:0044763,GO:0009987,GO:0044699,GO:0008150	regulation of biological quality,homeostatic process,cell redox homeostasis,cellular_component,cellular homeostasis,biological regulation,cell,regulation of biological process,regulation of cellular process,single-organism cellular process,cellular process,single-organism process,biological_process	--	--
ENSSSCT00000022627	ENSSSCG00000025716	-	JH118761.1:55794-61865	8.161	0	inf	0.00145	0.048842	--	GO:0005488,GO:0003674,GO:0003676,GO:0003677,GO:1901363,GO:0097159,GO:0000975,GO:0001067	binding,molecular_function,nucleic acid binding,DNA binding,heterocyclic compound binding,organic cyclic compound binding,regulatory region DNA binding,regulatory region nucleic acid binding	--	--
ENSSSCT00000022629	ENSSSCG00000025932	AP1S3	GL893592.2:34538-51784	8.13812	4.23883	0.941028	0.0001	0.00583627	adaptor related protein complex 1 sigma 3 subunit [Source:HGNC Symbol;Acc:HGNC:18971]	GO:0005515,GO:0006605,GO:0008565,GO:0005488,GO:0051649,GO:0045184,GO:0051641,GO:0015031,GO:0046907,GO:0006886,GO:0008104,GO:0071702,GO:0034613,GO:0033036,GO:0070727,GO:0003674,GO:0044699,GO:0051179,GO:0051234,GO:0006810,GO:0044765,GO:0008150,GO:0009987,GO:0044763,GO:0022892,GO:0005215	protein binding,protein targeting,protein transporter activity,binding,establishment of localization in cell,establishment of protein localization,cellular localization,protein transport,intracellular transport,intracellular protein transport,protein localization,organic substance transport,cellular protein localization,macromolecule localization,cellular macromolecule localization,molecular_func…	ssc04142	Lysosome
ENSSSCT00000033560	ENSSSCG00000017416	DHX58	chr12:20937867-20946850	1.83435	0.528918	1.79415	0.0039	0.0988008	DEXH (Asp-Glu-X-His) box polypeptide 58 [Source:HGNC Symbol;Acc:HGNC:29517]	--	--	ssc04622	RIG-I-like receptor signaling pathway
ENSSSCT00000033565	ENSSSCG00000001476	HSD17B8	chr7:29753836-29756015	27.165	39.3984	-0.536386	0.01635	0.24915	hydroxysteroid (17-beta) dehydrogenase 8 [Source:HGNC Symbol;Acc:HGNC:3554]	GO:0031967,GO:0031975,GO:0005622,GO:0003857,GO:0004303,GO:0006703,GO:0008210,GO:0047035,GO:0044424,GO:0005737,GO:0016616,GO:0043229,GO:0008209,GO:0016614,GO:0043231,GO:0005515,GO:0008150,GO:0033764,GO:0043226,GO:0016229,GO:0042446,GO:0009987,GO:0008152,GO:0034754,GO:0043227,GO:0065007,GO:0070013,GO:0043233,GO:0031974,GO:0005759,GO:0044464,GO:0003674,GO:0044444,GO:0005623,GO:0005488,GO:0003824,GO:…	organelle envelope,envelope,intracellular,3-hydroxyacyl-CoA dehydrogenase activity,estradiol 17-beta-dehydrogenase activity,estrogen biosynthetic process,estrogen metabolic process,testosterone dehydrogenase (NAD+) activity,intracellular part,cytoplasm,oxidoreductase activity, acting on the CH-OH group of donors, NAD or NADP as acceptor,intracellular organelle,androgen metabolic process,oxidoredu…	ssc00140,ssc01100	Steroid hormone biosynthesis,Metabolic pathways
ENSSSCT00000016320	ENSSSCG00000014959	PIWIL4	chr9:30457623-30505257	0.283885	0.507163	-0.83714	0.0439	0.423425	piwi-like RNA-mediated gene silencing 4 [Source:HGNC Symbol;Acc:HGNC:18444]	--	--	ssc04320	Dorso-ventral axis formation
ENSSSCT00000005649	ENSSSCG00000005124	IFT74	chr1:218533044-218618046	0.320044	0.513487	-0.682057	0.0319	0.359034	intraflagellar transport 74 [Source:HGNC Symbol;Acc:HGNC:21424]	--	--	--	--
ENSSSCT00000002611	ENSSSCG00000002347	DNAL1	chr7:102691234-102733635	4.13381	6.1681	-0.577356	0.03835	0.395221	dynein, axonemal, light chain 1 [Source:HGNC Symbol;Acc:HGNC:23247]	--	--	ssc05016	Huntington's disease
ENSSSCT00000026892	ENSSSCG00000022287	-	chr13:108091638-108105685	1.53343	2.7311	-0.83272	0.00445	0.108492	--	--	--	--	--
ENSSSCT00000034126	ENSSSCG00000023150	-	chr5:24286945-24309681	41.8026	33.5561	0.317019	0.0267	0.325277	--	--	--	ssc05144,ssc05010	Malaria,Alzheimer's disease
ENSSSCT00000035478	ENSSSCG00000017614	TRIM25	chr12:34080928-34087929	55.3481	35.6433	0.634904	0.0001	0.00583627	-	--	--	--	--
ENSSSCT00000009386	ENSSSCG00000008577	DNAJC27	chr3:121005515-121042157	0.57603	0.269016	1.09845	0.04445	0.425188	DnaJ heat shock protein family (Hsp40) member C27 [Source:HGNC Symbol;Acc:HGNC:30290]	--	--	--	--
ENSSSCT00000031001	ENSSSCG00000023522	TGM2	chr17:46592135-46629982	11.7224	9.50743	0.302136	0.043	0.419614	transglutaminase 2 [Source:HGNC Symbol;Acc:HGNC:11778]	--	--	ssc05016	Huntington's disease
ENSSSCT00000030759	ENSSSCG00000028283	-	GL892520.2:44549-70614	0.719292	1.07086	-0.574117	0.02955	0.344273	--	GO:0006950,GO:0044424,GO:0005622,GO:0043227,GO:0043226,GO:0043231,GO:0044446,GO:0043229,GO:0044422,GO:0071704,GO:0044237,GO:0097159,GO:1901363,GO:0048519,GO:0005488,GO:0000077,GO:0044238,GO:0005575,GO:0005634,GO:0031570,GO:0008152,GO:0003676,GO:0051726,GO:0033554,GO:0043170,GO:0032991,GO:1901360,GO:0048523,GO:0044260,GO:0007049,GO:0006807,GO:0034641,GO:0046483,GO:0006725,GO:0006139,GO:1901988,GO:…	response to stress,intracellular part,intracellular,membrane-bounded organelle,organelle,intracellular membrane-bounded organelle,intracellular organelle part,intracellular organelle,organelle part,organic substance metabolic process,cellular metabolic process,organic cyclic compound binding,heterocyclic compound binding,negative regulation of biological process,binding,DNA damage checkpoint,prim…	--	--
ENSSSCT00000035061	ENSSSCG00000017585	SAMD14	chr12:26335441-26354758	0.361275	0.806547	-1.15866	0.00265	0.0762516	sterile alpha motif domain containing 14 [Source:HGNC Symbol;Acc:HGNC:27312]	--	--	--	--
ENSSSCT00000035605	ENSSSCG00000012166	SMS	chrX:19303276-19353814	132.19	160.266	-0.277853	0.0455	0.430213	spermine synthase [Source:HGNC Symbol;Acc:HGNC:11123]	--	--	ssc00270,ssc00410,ssc00330,ssc00480,ssc01100	Cysteine and methionine metabolism,beta-Alanine metabolism,Arginine and proline metabolism,Glutathione metabolism,Metabolic pathways
ENSSSCT00000027785	ENSSSCG00000026902	-	GL895891.2:55407-95792	2.186	1.20898	0.854506	0.01445	0.231046	--	--	--	--	--
ENSSSCT00000029435	ENSSSCG00000028637	CYP27B1	GL892775.1:17108-22068	43.256	32.9188	0.393985	0.00985	0.181329	cytochrome P450 family 27 subfamily B member 1 [Source:HGNC Symbol;Acc:HGNC:2606]	--	--	ssc05152,ssc00100,ssc01100	Tuberculosis,Steroid biosynthesis,Metabolic pathways
ENSSSCT00000011620	ENSSSCG00000010624	DUSP5	chr14:131791152-131804261	20.8916	16.8373	0.311262	0.0362	0.383745	dual specificity phosphatase 5 [Source:HGNC Symbol;Acc:HGNC:3071]	--	--	ssc04010	MAPK signaling pathway
ENSSSCT00000011623	ENSSSCG00000010627	PDCD4	chr14:132232407-132260976	17.0095	21.139	-0.313568	0.04785	0.441648	programmed cell death 4 (neoplastic transformation inhibitor) [Source:HGNC Symbol;Acc:HGNC:8763]	--	--	ssc05205,ssc05206	Proteoglycans in cancer,MicroRNAs in cancer
ENSSSCT00000019464	ENSSSCG00000017887	XAF1	chr12:52643900-52658713	55.8158	11.8248	2.23885	5e-05	0.00318682	XIAP associated factor 1 [Source:HGNC Symbol;Acc:HGNC:30932]	--	--	--	--
ENSSSCT00000025678	ENSSSCG00000026661	-	chr18:1082447-1085403	0.757366	0.109355	2.79197	0.00925	0.174833	--	--	--	--	--
ENSSSCT00000029576	ENSSSCG00000024220	-	chr13:28201053-28294504	5.45969	3.19283	0.773981	0.0272	0.328603	--	GO:0005488,GO:0003674	binding,molecular_function	--	--
ENSSSCT00000012546	ENSSSCG00000011465	PDE12	chr13:43327040-43332915	13.8441	9.48471	0.545598	0.0004	0.0182909	phosphodiesterase 12 [Source:HGNC Symbol;Acc:HGNC:25386]	--	--	--	--
ENSSSCT00000015660	ENSSSCG00000014336	EGR1	chr2:146156064-146160020	9.74531	6.97348	0.482829	0.0031	0.0850105	early growth response 1 [Source:HGNC Symbol;Acc:HGNC:3238]	--	--	ssc05020,ssc05166	Prion diseases,HTLV-I infection
ENSSSCT00000006186	ENSSSCG00000005626	FPGS	chr1:302224596-302231230	8.61992	6.71896	0.359437	0.0469	0.437259	folylpolyglutamate synthase [Source:HGNC Symbol;Acc:HGNC:3824]	--	--	ssc00790,ssc01100	Folate biosynthesis,Metabolic pathways
ENSSSCT00000030552	ENSSSCG00000023557	CCRL2	chr13:32566383-32568453	45.6573	34.5715	0.401262	0.00795	0.160494	chemokine (C-C motif) receptor-like 2 [Source:HGNC Symbol;Acc:HGNC:1612]	--	--	--	--
ENSSSCT00000017690	ENSSSCG00000016246	-	chr15:142590191-142604715	25.1394	33.1711	-0.399978	0.0442	0.424561	--	--	--	--	--
ENSSSCT00000030140	ENSSSCG00000030548	HERC5	chr8:139945978-139974969	36.8414	6.86825	2.42331	5e-05	0.00318682	HECT and RLD domain containing E3 ubiquitin protein ligase 5 [Source:HGNC Symbol;Acc:HGNC:24368]	GO:0009615,GO:0051607,GO:0002252,GO:0051707,GO:0009607,GO:0045087,GO:0051704,GO:0006952,GO:0043900,GO:0006950,GO:0006955,GO:0002376,GO:0032020,GO:0031347,GO:0080134,GO:0050688,GO:0002697,GO:0016567,GO:0032446,GO:0002831,GO:0005622,GO:0070647,GO:0004842,GO:0002682,GO:0019787,GO:0044424,GO:0042296,GO:0005737,GO:0016881,GO:0050896,GO:0016879,GO:0016874,GO:0048583,GO:0005515,GO:0008150,GO:0009987,GO:…	response to virus,defense response to virus,immune effector process,response to other organism,response to biotic stimulus,innate immune response,multi-organism process,defense response,regulation of multi-organism process,response to stress,immune response,immune system process,ISG15-protein conjugation,regulation of defense response,regulation of response to stress,regulation of defense respons…	--	--
ENSSSCT00000001176	ENSSSCG00000001081	SOX4	chr7:17852989-17854423	0.618897	0.294781	1.07006	0.01935	0.273753	SRY-box 4 [Source:HGNC Symbol;Acc:HGNC:11200]	--	--	--	--
ENSSSCT00000001171	ENSSSCG00000001076	RNF144B	chr7:14781094-14860574	4.01529	1.90328	1.07702	5e-05	0.00318682	ring finger protein 144B [Source:HGNC Symbol;Acc:HGNC:21578]	--	--	--	--
ENSSSCT00000024038	ENSSSCG00000020967	-	chr12:6609316-6619163	10.0794	7.89858	0.351742	0.0327	0.363805	--	--	--	--	--
ENSSSCT00000033097	ENSSSCG00000012591	AMOT	chrX:106946507-107012675	0.513058	0.196681	1.38326	0.00045	0.0200341	angiomotin [Source:HGNC Symbol;Acc:HGNC:17810]	--	--	ssc04390	Hippo signaling pathway
ENSSSCT00000004472	ENSSSCG00000004044	IGF2R	chr1:9166934-9271240	51.3129	40.6646	0.335549	0.0155	0.241174	-	--	--	ssc04142	Lysosome
ENSSSCT00000000402	ENSSSCG00000000376	-	chr5:22937053-22941076	0.273668	0.596792	-1.1248	0.01085	0.192902	--	GO:0003824,GO:0042128,GO:0030151,GO:0042126,GO:2001057,GO:1901363,GO:0003674,GO:0097159,GO:0071941,GO:0071704,GO:0008152,GO:0008150,GO:0009987,GO:0044237,GO:0005488,GO:0046914,GO:0044710,GO:0006807,GO:0020037,GO:0046906,GO:0016491,GO:0044281,GO:0055114,GO:0043169,GO:0043167,GO:0043436,GO:0006082,GO:0046872	catalytic activity,nitrate assimilation,molybdenum ion binding,nitrate metabolic process,reactive nitrogen species metabolic process,heterocyclic compound binding,molecular_function,organic cyclic compound binding,nitrogen cycle metabolic process,organic substance metabolic process,metabolic process,biological_process,cellular process,cellular metabolic process,binding,transition metal ion bindin…	ssc00920	Sulfur metabolism
ENSSSCT00000025181	ENSSSCG00000025463	-	GL894927.1:6945-32215	7.12913	9.56377	-0.423853	0.04565	0.430953	--	GO:0005515,GO:0005488,GO:0005575,GO:0003674,GO:0043167,GO:0043169,GO:0046872,GO:0005576,GO:0005509	protein binding,binding,cellular_component,molecular_function,ion binding,cation binding,metal ion binding,extracellular region,calcium ion binding	ssc04610	Complement and coagulation cascades
ENSSSCT00000013002	ENSSSCG00000011885	FBXO40	chr13:148511699-148517485	1.59841	0.921932	0.793909	0.01975	0.277141	F-box protein 40 [Source:HGNC Symbol;Acc:HGNC:29816]	--	--	--	--
ENSSSCT00000024059	ENSSSCG00000024430	HES4	chr6:57945475-57946990	1.74296	0.054854	4.9898	0.01115	0.196234	hes family bHLH transcription factor 4 [Source:HGNC Symbol;Acc:HGNC:24149]	--	--	--	--
ENSSSCT00000031288	ENSSSCG00000029434	SLC10A5	GL893852.2:48964-50272	0.515885	0.937302	-0.861464	0.02185	0.292508	solute carrier family 10 member 5 [Source:HGNC Symbol;Acc:HGNC:22981]	GO:0003674,GO:0005575,GO:0008508,GO:0015125,GO:0015721,GO:0044699,GO:0008150,GO:0008028,GO:0005623,GO:0005343,GO:0071702,GO:0015718,GO:0015370,GO:0044464,GO:0051179,GO:0005319,GO:0046943,GO:0015293,GO:0015294,GO:0005342,GO:0051234,GO:0008514,GO:0015849,GO:0046942,GO:0006810,GO:0015081,GO:0022892,GO:0015291,GO:0022891,GO:0044765,GO:0015711,GO:0005215,GO:0022857,GO:0008509,GO:0015077,GO:0016020,GO:…	molecular_function,cellular_component,bile acid:sodium symporter activity,bile acid transmembrane transporter activity,bile acid and bile salt transport,single-organism process,biological_process,monocarboxylic acid transmembrane transporter activity,cell,organic acid:sodium symporter activity,organic substance transport,monocarboxylic acid transport,solute:sodium symporter activity,cell part,loc…	--	--
ENSSSCT00000016255	ENSSSCG00000014900	RAB30	chr9:19117862-19130117	1.43122	0.716837	0.997529	0.03635	0.384541	RAB30, member RAS oncogene family [Source:HGNC Symbol;Acc:HGNC:9770]	--	--	--	--
ENSSSCT00000013595	ENSSSCG00000012434	-	chrX:70390622-70790550	0.269071	1.00324	-1.89861	0.03295	0.365322	--	--	--	--	--
ENSSSCT00000014674	ENSSSCG00000013430	CBARP	chr2:77824436-77828887	1.49984	0.92291	0.700547	0.01665	0.251882	calcium channel, voltage-dependent, beta subunit associated regulatory protein [Source:HGNC Symbol;Acc:HGNC:28617]	--	--	--	--
ENSSSCT00000022614	ENSSSCG00000028740	CTDSPL	chr13:24871054-24994231	2.5449	3.24316	-0.34979	0.0459	0.432149	CTD small phosphatase like [Source:HGNC Symbol;Acc:HGNC:16890]	--	--	--	--
ENSSSCT00000028286	ENSSSCG00000021793	SMIM14	chr8:32380056-32387060	40.2962	49.3105	-0.291253	0.0331	0.366279	small integral membrane protein 14 [Source:HGNC Symbol;Acc:HGNC:27321]	GO:0044424,GO:0005622,GO:0005737,GO:0043231,GO:0043229,GO:0043226,GO:0043227,GO:0005623,GO:0044464,GO:0005575,GO:0005783,GO:0044444	intracellular part,intracellular,cytoplasm,intracellular membrane-bounded organelle,intracellular organelle,organelle,membrane-bounded organelle,cell,cell part,cellular_component,endoplasmic reticulum,cytoplasmic part	--	--
ENSSSCT00000010832	ENSSSCG00000009882	OAS1	chr14:41230164-41288614	267.602	137.985	0.955582	0.00205	0.0631641	2'-5'-oligoadenylate synthetase 1 [Source:HGNC Symbol;Acc:HGNC:8086]	GO:0009615,GO:0051607,GO:0002252,GO:0048525,GO:0051707,GO:0009607,GO:0045071,GO:0043901,GO:0051704,GO:0035455,GO:0006952,GO:0034097,GO:0045069,GO:0050792,GO:0019079,GO:0043903,GO:0019058,GO:0035457,GO:0043900,GO:0010033,GO:0006950,GO:0071310,GO:0071345,GO:0016032,GO:0044764,GO:0006955,GO:0044403,GO:0044419,GO:0002376,GO:0070887,GO:0042221,GO:0003723,GO:0005622,GO:0003725,GO:0001730,GO:0044424,GO:…	response to virus,defense response to virus,immune effector process,negative regulation of viral process,response to other organism,response to biotic stimulus,negative regulation of viral genome replication,negative regulation of multi-organism process,multi-organism process,response to interferon-alpha,defense response,response to cytokine stimulus,regulation of viral genome replication,regulat…	ssc05164,ssc05162,ssc05160,ssc05168	Influenza A,Measles,Hepatitis C,Herpes simplex infection
ENSSSCT00000010831	ENSSSCG00000009881	OAS2	chr14:41196285-41208970	66.3553	18.8708	1.81405	5e-05	0.00318682	2'-5'-oligoadenylate synthetase 2 [Source:HGNC Symbol;Acc:HGNC:8087]	--	--	ssc05164,ssc05162,ssc05160,ssc05168	Influenza A,Measles,Hepatitis C,Herpes simplex infection
ENSSSCT00000004165	ENSSSCG00000003763	IFI44	chr6:124790062-124806819	59.5888	17.6702	1.75372	5e-05	0.00318682	interferon induced protein 44 [Source:HGNC Symbol;Acc:HGNC:16938]	--	--	--	--
ENSSSCT00000005691	ENSSSCG00000005163	IFNB1	chr1:225469553-225470114	5.84026	0	inf	5e-05	0.00318682	interferon, beta 1, fibroblast [Source:HGNC Symbol;Acc:HGNC:5434]	--	--	ssc05164,ssc04623,ssc05162,ssc04622,ssc05160,ssc05168,ssc04620,ssc04380,ssc04650,ssc05142,ssc05161,ssc04060,ssc05152,ssc04630,ssc04151	Influenza A,Cytosolic DNA-sensing pathway,Measles,RIG-I-like receptor signaling pathway,Hepatitis C,Herpes simplex infection,Toll-like receptor signaling pathway,Osteoclast differentiation,Natural killer cell mediated cytotoxicity,Chagas disease (American trypanosomiasis),Hepatitis B,Cytokine-cytokine receptor interaction,Tuberculosis,Jak-STAT signaling pathway,PI3K-Akt signaling pathway
ENSSSCT00000022458	ENSSSCG00000027860	-	chr2:107342451-107363745	29.993	22.9011	0.389207	0.0057	0.128755	--	--	--	--	--
ENSSSCT00000029838	ENSSSCG00000026412	-	chr9:148127164-148333069	2.96688	2.37431	0.321438	0.039	0.398463	--	GO:0071526,GO:0065008,GO:0016477,GO:0048870,GO:0051674,GO:0017154,GO:0006928,GO:0007610,GO:0043235,GO:0050920,GO:0040011,GO:0005515,GO:0048513,GO:0050795,GO:0021535,GO:0048846,GO:1902284,GO:0032879,GO:0051641,GO:1902285,GO:0048588,GO:0006935,GO:0042330,GO:0048646,GO:0022603,GO:0048675,GO:0005575,GO:0060037,GO:0016049,GO:1990138,GO:0030516,GO:0030154,GO:2000145,GO:0048841,GO:0051270,GO:0048583,GO:…	semaphorin-plexin signaling pathway,regulation of biological quality,cell migration,cell motility,localization of cell,semaphorin receptor activity,cellular component movement,behavior,receptor complex,regulation of chemotaxis,locomotion,protein binding,organ development,regulation of behavior,cell migration in hindbrain,axon extension involved in axon guidance,neuron projection extension involve…	ssc04360	Axon guidance
ENSSSCT00000015132	ENSSSCG00000013853	HSH2D	chr2:61050295-61057022	2.41	0.361688	2.73622	5e-05	0.00318682	hematopoietic SH2 domain containing [Source:HGNC Symbol;Acc:HGNC:24920]	--	--	--	--
ENSSSCT00000011591	ENSSSCG00000010597	TAF5	GL895853.2:29472-41518	1.8219	2.67625	-0.554773	0.02505	0.313639	TATA-box binding protein associated factor 5 [Source:HGNC Symbol;Acc:HGNC:11539]	GO:0003824,GO:0044424,GO:0000975,GO:0001067,GO:0005654,GO:0005515,GO:0043412,GO:0005634,GO:0005622,GO:0006464,GO:0036211,GO:0043227,GO:1901363,GO:0033276,GO:0003676,GO:0016569,GO:0016570,GO:0003674,GO:0044451,GO:0097159,GO:0043231,GO:0070013,GO:0043233,GO:0043229,GO:0043226,GO:0031974,GO:0006352,GO:0050789,GO:0044428,GO:0044212,GO:0065007,GO:0005669,GO:0005575,GO:0003677,GO:0006366,GO:0016568,GO:…	catalytic activity,intracellular part,regulatory region DNA binding,regulatory region nucleic acid binding,nucleoplasm,protein binding,macromolecule modification,nucleus,intracellular,cellular protein modification process,protein modification process,membrane-bounded organelle,heterocyclic compound binding,transcription factor TFTC complex,nucleic acid binding,covalent chromatin modification,hist…	ssc05168,ssc03022	Herpes simplex infection,Basal transcription factors
ENSSSCT00000013209	ENSSSCG00000012076	MX2	chr13:215028063-215059085	167.509	40.412	2.05138	5e-05	0.00318682	MX dynamin-like GTPase 2 [Source:HGNC Symbol;Acc:HGNC:7533]	GO:0009615,GO:0051607,GO:0002252,GO:0051707,GO:0009607,GO:0051704,GO:0035455,GO:0006952,GO:0034097,GO:0010033,GO:0006950,GO:0002376,GO:0042221,GO:0005635,GO:0005525,GO:0031967,GO:0031975,GO:0019001,GO:0032561,GO:0005622,GO:0044424,GO:0007049,GO:0050896,GO:0043229,GO:1901363,GO:0043231,GO:0097159,GO:0006913,GO:0051169,GO:0005515,GO:0036094,GO:0008150,GO:0005634,GO:0044428,GO:0043226,GO:0012505,GO:…	response to virus,defense response to virus,immune effector process,response to other organism,response to biotic stimulus,multi-organism process,response to interferon-alpha,defense response,response to cytokine stimulus,response to organic substance,response to stress,immune system process,response to chemical stimulus,nuclear envelope,GTP binding,organelle envelope,envelope,guanyl nucleotide b…	--	--
ENSSSCT00000015968	ENSSSCG00000014618	-	chr9:3718553-3725457	47.1456	24.7519	0.929584	5e-05	0.00318682	--	--	--	--	--
ENSSSCT00000024461	ENSSSCG00000022912	NT5C3A	chr18:44383494-44425983	24.3558	11.9217	1.03067	5e-05	0.00318682	5'-nucleotidase, cytosolic IIIA [Source:HGNC Symbol;Acc:HGNC:17820]	GO:0008252,GO:0008253,GO:0043231,GO:0043229,GO:0005783,GO:0009117,GO:0006753,GO:0019637,GO:0005488,GO:0044444,GO:0044424,GO:0005737,GO:0055086,GO:0003824,GO:0043227,GO:0043226,GO:0005622,GO:0044281,GO:0016788,GO:0016311,GO:1901363,GO:0042578,GO:0097159,GO:0006796,GO:0006793,GO:0003674,GO:0044238,GO:0005739,GO:0034641,GO:0016787,GO:0036094,GO:0006139,GO:0044237,GO:0046483,GO:0006725,GO:0071704,GO:…	nucleotidase activity,5'-nucleotidase activity,intracellular membrane-bounded organelle,intracellular organelle,endoplasmic reticulum,nucleotide metabolic process,nucleoside phosphate metabolic process,organophosphate metabolic process,binding,cytoplasmic part,intracellular part,cytoplasm,nucleobase-containing small molecule metabolic process,catalytic activity,membrane-bounded organelle,organell…	ssc00240,ssc00760,ssc00230,ssc01100	Pyrimidine metabolism,Nicotinate and nicotinamide metabolism,Purine metabolism,Metabolic pathways
ENSSSCT00000001892	ENSSSCG00000001695	VEGFA	chr7:44459902-44474467	58.6256	47.9199	0.290908	0.0362	0.383745	vascular endothelial growth factor A [Source:HGNC Symbol;Acc:HGNC:12680]	--	--	ssc04060,ssc05323,ssc05211,ssc05219,ssc05200,ssc04370,ssc04066,ssc05212,ssc05205,ssc04014,ssc04150,ssc04015,ssc04151,ssc05206,ssc04510	Cytokine-cytokine receptor interaction,Rheumatoid arthritis,Renal cell carcinoma,Bladder cancer,Pathways in cancer,VEGF signaling pathway,HIF-1 signaling pathway,Pancreatic cancer,Proteoglycans in cancer,Ras signaling pathway,mTOR signaling pathway,Rap1 signaling pathway,PI3K-Akt signaling pathway,MicroRNAs in cancer,Focal adhesion
ENSSSCT00000002818	ENSSSCG00000002538	DYNC1H1	GL894441.2:49589-74536	23.3361	18.6522	0.32322	0.0214	0.290335	dynein, cytoplasmic 1, heavy chain 1 [Source:HGNC Symbol;Acc:HGNC:2961]	GO:0044424,GO:0006928,GO:0005622,GO:0043229,GO:0043227,GO:0051649,GO:0005515,GO:0043226,GO:0005737,GO:0007049,GO:0051641,GO:0022402,GO:0005575,GO:0033962,GO:0022618,GO:0071826,GO:0034622,GO:0044446,GO:0005488,GO:0045502,GO:0044422,GO:0032991,GO:0051959,GO:0008152,GO:0051640,GO:0005623,GO:0007018,GO:0051179,GO:0034063,GO:0051656,GO:0030175,GO:0051293,GO:0044464,GO:0043228,GO:0043232,GO:0051653,GO:…	intracellular part,cellular component movement,intracellular,intracellular organelle,membrane-bounded organelle,establishment of localization in cell,protein binding,organelle,cytoplasm,cell cycle,cellular localization,cell cycle process,cellular_component,cytoplasmic mRNA processing body assembly,ribonucleoprotein complex assembly,ribonucleoprotein complex subunit organization,cellular macromole…	ssc05132,ssc04145,ssc04962	Salmonella infection,Phagosome,Vasopressin-regulated water reabsorption
ENSSSCT00000024105	ENSSSCG00000026383	NRP2	JH118531.1:6456-115137	54.6859	44.1645	0.308281	0.02195	0.293304	neuropilin 2 [Source:HGNC Symbol;Acc:HGNC:8005]	GO:0010033,GO:0071310,GO:0071526,GO:0070887,GO:0016477,GO:0048870,GO:0051674,GO:0017154,GO:0006928,GO:0040011,GO:0005515,GO:0048513,GO:0009888,GO:0048846,GO:1902284,GO:0001667,GO:1902285,GO:0048588,GO:0006935,GO:0042330,GO:0048646,GO:0048675,GO:0005575,GO:0016049,GO:1990138,GO:0048514,GO:0001525,GO:0072358,GO:0072359,GO:0030154,GO:0070848,GO:0006929,GO:0007507,GO:0005488,GO:0060560,GO:0001944,GO:…	response to organic substance,cellular response to organic substance,semaphorin-plexin signaling pathway,cellular response to chemical stimulus,cell migration,cell motility,localization of cell,semaphorin receptor activity,cellular component movement,locomotion,protein binding,organ development,tissue development,axon extension involved in axon guidance,neuron projection extension involved in neu…	--	--

## Sheet: VR2332
transcript_id	gene_id	gene_name	gene_location	VR2332_FPKM	Mock_FPKM	log2(foldchange)	pvalue	qvalue	Gene_description	GO_id	GO_description	KO_id	KO_pathway
ENSSSCT00000013818	ENSSSCG00000012637	KLHL13	chrX:115091103-115105099	1.03461	1.6467	-0.670486	0.02725	0.32896	kelch like family member 13 [Source:HGNC Symbol;Acc:HGNC:22931]	--	--	ssc04120	Ubiquitin mediated proteolysis
ENSSSCT00000029642	ENSSSCG00000027862	FAM200B	chr8:10648966-10650934	7.88101	14.0269	-0.831748	5e-05	0.00318682	family with sequence similarity 200 member B [Source:HGNC Symbol;Acc:HGNC:27740]	--	--	--	--
ENSSSCT00000007823	ENSSSCG00000007150	TIGD6	chr17:36263348-36263885	76.1931	96.1217	-0.335202	0.03105	0.353725	tigger transposable element derived 6 [Source:HGNC Symbol;Acc:HGNC:18332]	--	--	--	--
ENSSSCT00000002957	ENSSSCG00000002666	KIAA0513	chr6:4161679-4206391	11.658	16.3827	-0.490848	0.00335	0.0898266	KIAA0513 [Source:HGNC Symbol;Acc:HGNC:29058]	--	--	--	--
ENSSSCT00000001751	ENSSSCG00000001572	FGD2	chr7:37551886-37578005	6.28773	4.73808	0.408236	0.02275	0.299588	FYVE, RhoGEF and PH domain containing 2 [Source:HGNC Symbol;Acc:HGNC:3664]	--	--	--	--
ENSSSCT00000001758	ENSSSCG00000001579	-	chr7:37905565-37968899	27.2356	15.8576	0.780313	5e-05	0.00318682	--	--	--	--	--
ENSSSCT00000002221	ENSSSCG00000001985	CBLN3	chr7:80136163-80140367	0.825891	0.490034	0.75307	0.0071	0.149368	cerebellin 3 precursor [Source:HGNC Symbol;Acc:HGNC:20146]	--	--	--	--
ENSSSCT00000002220	ENSSSCG00000001984	KHNYN	chr7:80122130-80136152	35.2472	24.9908	0.49611	0.0001	0.00583627	KH and NYN domain containing [Source:HGNC Symbol;Acc:HGNC:20166]	--	--	--	--
ENSSSCT00000022695	ENSSSCG00000028304	ZFP36L1	chr7:98803327-98809071	25.4705	15.7617	0.692404	5e-05	0.00318682	ZFP36 ring finger protein-like 1 [Source:HGNC Symbol;Acc:HGNC:1107]	GO:0002376,GO:0065008,GO:0010608,GO:0030097,GO:0044424,GO:0003723,GO:0006417,GO:0002520,GO:0010468,GO:0048534,GO:0005622,GO:0010467,GO:0043231,GO:0043229,GO:0043227,GO:0012501,GO:0008219,GO:0016265,GO:0005515,GO:0048513,GO:0006915,GO:0009888,GO:0043226,GO:0030217,GO:0005737,GO:2000112,GO:0010556,GO:0060255,GO:0009058,GO:1901576,GO:0032268,GO:0044249,GO:0034645,GO:0005634,GO:0090304,GO:0003676,GO:…	immune system process,regulation of biological quality,posttranscriptional regulation of gene expression,hemopoiesis,intracellular part,RNA binding,regulation of translation,immune system development,regulation of gene expression,hematopoietic or lymphoid organ development,intracellular,gene expression,intracellular membrane-bounded organelle,intracellular organelle,membrane-bounded organelle,pro…	--	--
ENSSSCT00000012304	ENSSSCG00000011237	PDCD6IP	chr13:21193214-21240142	81.4732	66.5142	0.292662	0.0309	0.352858	programmed cell death 6 interacting protein [Source:HGNC Symbol;Acc:HGNC:8766]	--	--	ssc04144	Endocytosis
ENSSSCT00000017482	ENSSSCG00000016057	STAT1	JH118841.1:95633-132917	362.727	145.936	1.31355	5e-05	0.00318682	Sus scrofa signal transducer and activator of transcription 1, 91kDa (STAT1), mRNA. [Source:RefSeq mRNA;Acc:NM_213769]	GO:0043231,GO:0005634,GO:0043229,GO:0005488,GO:0044424,GO:0005737,GO:0043227,GO:0043226,GO:0005622,GO:0003676,GO:0050896,GO:1901363,GO:0097159,GO:0003674,GO:0044238,GO:0034641,GO:0006139,GO:0044237,GO:0046483,GO:0006725,GO:0010467,GO:0071704,GO:0051716,GO:0008152,GO:1901360,GO:0006807,GO:0019222,GO:0044260,GO:0010468,GO:0044464,GO:0090304,GO:0005623,GO:0003677,GO:0043170,GO:0001071,GO:0003700,GO:…	intracellular membrane-bounded organelle,nucleus,intracellular organelle,binding,intracellular part,cytoplasm,membrane-bounded organelle,organelle,intracellular,nucleic acid binding,response to stimulus,heterocyclic compound binding,organic cyclic compound binding,molecular_function,primary metabolic process,cellular nitrogen compound metabolic process,nucleobase-containing compound metabolic pro…	ssc05164,ssc05168,ssc04620,ssc05162,ssc05161,ssc05160,ssc05140,ssc04380,ssc04062,ssc05200,ssc05152,ssc04917,ssc05145,ssc04630,ssc05321,ssc05212,ssc04919	Influenza A,Herpes simplex infection,Toll-like receptor signaling pathway,Measles,Hepatitis B,Hepatitis C,Leishmaniasis,Osteoclast differentiation,Chemokine signaling pathway,Pathways in cancer,Tuberculosis,Prolactin signaling pathway,Toxoplasmosis,Jak-STAT signaling pathway,Inflammatory bowel disease (IBD),Pancreatic cancer,Thyroid hormone signaling pathway
ENSSSCT00000017487	ENSSSCG00000016062	NABP1	chr15:107658456-107666685	10.3224	7.76467	0.410784	0.0195	0.27507	nucleic acid binding protein 1 [Source:HGNC Symbol;Acc:HGNC:26232]	GO:0006950,GO:0007093,GO:0000075,GO:0005515,GO:0010948,GO:0051726,GO:1901988,GO:1901991,GO:1901990,GO:0005622,GO:0043226,GO:0048523,GO:0043227,GO:0044772,GO:0003723,GO:0044424,GO:0010564,GO:0048519,GO:0006302,GO:1901987,GO:0005634,GO:0005737,GO:0006974,GO:0006281,GO:0007346,GO:0043229,GO:0005654,GO:0044770,GO:0043231,GO:0007049,GO:0044428,GO:0031974,GO:0005488,GO:0070013,GO:0031981,GO:0043233,GO:…	response to stress,mitotic cell cycle checkpoint,cell cycle checkpoint,protein binding,negative regulation of cell cycle process,regulation of cell cycle,negative regulation of cell cycle phase transition,negative regulation of mitotic cell cycle phase transition,regulation of mitotic cell cycle phase transition,intracellular,organelle,negative regulation of cellular process,membrane-bounded orga…	--	--
ENSSSCT00000029406	ENSSSCG00000022144	QPCTL	GL896302.1:53945-58928	1.35444	0.611817	1.14652	0.01835	0.265523	glutaminyl-peptide cyclotransferase-like [Source:HGNC Symbol;Acc:HGNC:25952]	--	--	--	--
ENSSSCT00000019463	ENSSSCG00000017886	FBXO39	chr12:52636411-52639252	3.98679	0.710849	2.48761	5e-05	0.00318682	F-box protein 39 [Source:HGNC Symbol;Acc:HGNC:28565]	--	--	--	--
ENSSSCT00000017979	ENSSSCG00000016512	ZC3HAV1	chr18:11014952-11070159	34.6023	24.288	0.510627	0.00035	0.0164533	zinc finger CCCH-type, antiviral 1 [Source:HGNC Symbol;Acc:HGNC:23721]	--	--	--	--
ENSSSCT00000014443	ENSSSCG00000013223	NUP160	chr2:15899094-15950508	5.76423	4.50947	0.354169	0.021	0.28715	nucleoporin 160kDa [Source:HGNC Symbol;Acc:HGNC:18017]	--	--	ssc03013	RNA transport
ENSSSCT00000003510	ENSSSCG00000003160	NTF4	chr6:50054549-50057398	0.917599	1.54817	-0.754631	0.0247	0.311131	neurotrophin 4 [Source:HGNC Symbol;Acc:HGNC:8024]	--	--	ssc04722,ssc04010	Neurotrophin signaling pathway,MAPK signaling pathway
ENSSSCT00000028418	ENSSSCG00000029475	TRIM25	chr12:34136166-34138282	62.3333	28.3695	1.13566	5e-05	0.00318682	tripartite motif containing 25 [Source:HGNC Symbol;Acc:HGNC:12932]	--	--	ssc05164,ssc04622,ssc04064	Influenza A,RIG-I-like receptor signaling pathway,NF-kappa B signaling pathway
ENSSSCT00000004982	ENSSSCG00000004510	ACAA2	chr1:108842619-108870348	26.5262	36.6724	-0.467276	0.00115	0.0410868	acetyl-CoA acyltransferase 2 [Source:HGNC Symbol;Acc:HGNC:83]	--	--	ssc01212,ssc00071,ssc00062,ssc00280,ssc01100	Fatty acid metabolism,Fatty acid degradation,Fatty acid elongation,Valine, leucine and isoleucine degradation,Metabolic pathways
ENSSSCT00000026840	ENSSSCG00000024096	RIPK2	chr4:51490308-51504917	4.7345	3.43292	0.463779	0.02865	0.338422	-	--	--	ssc04621,ssc05152,ssc04722	NOD-like receptor signaling pathway,Tuberculosis,Neurotrophin signaling pathway
ENSSSCT00000007168	ENSSSCG00000006543	ADAR	chr4:104004653-104023302	41.7082	13.1087	1.66981	5e-05	0.00318682	adenosine deaminase, RNA-specific [Source:HGNC Symbol;Acc:HGNC:225]	--	--	ssc05164,ssc04623,ssc05162	Influenza A,Cytosolic DNA-sensing pathway,Measles
ENSSSCT00000030462	ENSSSCG00000023216	-	chr8:78969471-78985250	3.63518	4.99174	-0.457515	0.0298	0.345921	--	GO:0044424,GO:0005622,GO:0010467,GO:0043231,GO:0043229,GO:0043227,GO:0005515,GO:0043226,GO:0005634,GO:0090304,GO:0071013,GO:0005575,GO:0016070,GO:0043170,GO:0044260,GO:1901360,GO:0044446,GO:0005488,GO:0032993,GO:0044422,GO:0071704,GO:0034641,GO:0032991,GO:0005681,GO:0044238,GO:0031461,GO:0030529,GO:0006139,GO:0046483,GO:0008152,GO:0016071,GO:0006725,GO:0044237,GO:0044428,GO:0005623,GO:0006807,GO:…	intracellular part,intracellular,gene expression,intracellular membrane-bounded organelle,intracellular organelle,membrane-bounded organelle,protein binding,organelle,nucleus,nucleic acid metabolic process,catalytic step 2 spliceosome,cellular_component,RNA metabolic process,macromolecule metabolic process,cellular macromolecule metabolic process,organic cyclic compound metabolic process,intracel…	ssc03040	Spliceosome
ENSSSCT00000015302	ENSSSCG00000014009	CNOT6	chr2:79564323-79619161	4.89693	3.21589	0.606659	0.0004	0.0182909	CCR4-NOT transcription complex subunit 6 [Source:HGNC Symbol;Acc:HGNC:14099]	GO:0005515,GO:0005622,GO:0044424,GO:0008284,GO:0005488,GO:0016071,GO:0051130,GO:0010606,GO:2000325,GO:2000327,GO:0044464,GO:0008283,GO:0005623,GO:0048522,GO:0042127,GO:0006401,GO:0070966,GO:0010603,GO:0004535,GO:0033043,GO:1902115,GO:0048518,GO:0004540,GO:1901360,GO:0000291,GO:0043928,GO:0051128,GO:1902117,GO:0046483,GO:0022613,GO:0006139,GO:0030014,GO:0000956,GO:0034655,GO:0022618,GO:0090501,GO:…	protein binding,intracellular,intracellular part,positive regulation of cell proliferation,binding,mRNA metabolic process,positive regulation of cellular component organization,positive regulation of cytoplasmic mRNA processing body assembly,regulation of ligand-dependent nuclear receptor transcription coactivator activity,positive regulation of ligand-dependent nuclear receptor transcription coa…	ssc03018	RNA degradation
ENSSSCT00000024553	ENSSSCG00000021903	-	chr2:162076799-162077818	5.75729	0.450468	3.67589	0.04415	0.424537	--	--	--	--	--
ENSSSCT00000031415	ENSSSCG00000027209	-	chr13:141934254-141974960	34.2764	22.3666	0.615868	0.0026	0.075175	--	GO:0034655,GO:0005515,GO:0009117,GO:0006753,GO:0044248,GO:0044270,GO:0046700,GO:0019637,GO:0005488,GO:0019439,GO:1901361,GO:0055086,GO:0009141,GO:0044281,GO:0009056,GO:0065009,GO:0051336,GO:0009143,GO:0009146,GO:0006195,GO:0009166,GO:1901292,GO:0072523,GO:0046434,GO:0050790,GO:0031329,GO:0009144,GO:1901136,GO:0006796,GO:0006793,GO:1901135,GO:0009894,GO:0003674,GO:1901575,GO:0044238,GO:0034641,GO:…	nucleobase-containing compound catabolic process,protein binding,nucleotide metabolic process,nucleoside phosphate metabolic process,cellular catabolic process,cellular nitrogen compound catabolic process,heterocycle catabolic process,organophosphate metabolic process,binding,aromatic compound catabolic process,organic cyclic compound catabolic process,nucleobase-containing small molecule metabol…	ssc04144	Endocytosis
ENSSSCT00000031417	ENSSSCG00000028357	-	GL894948.1:1036-6292	32.2969	19.3001	0.742789	0.0028	0.0791836	--	GO:0005622,GO:0043226,GO:0043227,GO:0044424,GO:0005634,GO:0005737,GO:0043229,GO:0005654,GO:0043231,GO:0044428,GO:0031974,GO:0070013,GO:0031981,GO:0043233,GO:0006368,GO:0051276,GO:0044446,GO:0044464,GO:0008023,GO:0005623,GO:0044422,GO:0016569,GO:0016570,GO:0002097,GO:0002098,GO:0033588,GO:0006354,GO:1901360,GO:0006325,GO:0046483,GO:0044451,GO:0018205,GO:0006139,GO:0016568,GO:0003674,GO:0016407,GO:…	intracellular,organelle,membrane-bounded organelle,intracellular part,nucleus,cytoplasm,intracellular organelle,nucleoplasm,intracellular membrane-bounded organelle,nuclear part,membrane-enclosed lumen,intracellular organelle lumen,nuclear lumen,organelle lumen,transcription elongation from RNA polymerase II promoter,chromosome organization,intracellular organelle part,cell part,transcription elo…	--	--
ENSSSCT00000026306	ENSSSCG00000030232	-	chr3:58000332-58021275	2.34394	1.20092	0.964791	0.0038	0.09698	--	--	--	--	--
ENSSSCT00000028650	ENSSSCG00000023288	-	JH118404.1:113923-119915	35.723	44.1261	-0.304777	0.0318	0.358418	--	--	--	--	--
ENSSSCT00000008201	ENSSSCG00000007492	FAM210B	chr17:64053336-64064901	19.0821	23.2082	-0.282417	0.04775	0.441164	family with sequence similarity 210 member B [Source:HGNC Symbol;Acc:HGNC:16102]	--	--	--	--
ENSSSCT00000019610	ENSSSCG00000018015	-	chr12:59181796-59247567	0.954641	0.524335	0.864471	0.043	0.419614	--	--	--	--	--
ENSSSCT00000029210	ENSSSCG00000028512	LDLR	GL896440.1:2829-14728	17.5894	10.1119	0.798652	5e-05	0.00318682	low density lipoprotein receptor [Source:HGNC Symbol;Acc:HGNC:6547]	GO:0065008,GO:0042592,GO:0048518,GO:0044424,GO:0043235,GO:0005622,GO:0048522,GO:0043231,GO:0010866,GO:0010867,GO:0043229,GO:0043227,GO:0008202,GO:0005515,GO:0009897,GO:0043226,GO:0005737,GO:0009058,GO:1901576,GO:0045834,GO:0044249,GO:0044444,GO:0046889,GO:0019222,GO:0005575,GO:0031326,GO:0019216,GO:0002020,GO:0009889,GO:0090208,GO:0009986,GO:0043170,GO:0015918,GO:0030301,GO:0019432,GO:0008203,GO:…	regulation of biological quality,homeostatic process,positive regulation of biological process,intracellular part,receptor complex,intracellular,positive regulation of cellular process,intracellular membrane-bounded organelle,regulation of triglyceride biosynthetic process,positive regulation of triglyceride biosynthetic process,intracellular organelle,membrane-bounded organelle,steroid metabolic…	ssc05160,ssc04144,ssc05145,ssc04976,ssc04913	Hepatitis C,Endocytosis,Toxoplasmosis,Bile secretion,Ovarian steroidogenesis
ENSSSCT00000010390	ENSSSCG00000009477	EDNRB	chr11:54691945-54718001	10.3554	5.46232	0.922794	5e-05	0.00318682	endothelin receptor type B [Source:HGNC Symbol;Acc:HGNC:3180]	--	--	ssc04916,ssc04022,ssc04020,ssc04080	Melanogenesis,cGMP-PKG signaling pathway,Calcium signaling pathway,Neuroactive ligand-receptor interaction
ENSSSCT00000011372	ENSSSCG00000010388	C10orf128	chr14:97564666-97598353	2.45714	3.65865	-0.574333	0.0198	0.277533	chromosome 10 open reading frame 128 [Source:HGNC Symbol;Acc:HGNC:27274]	GO:0005575,GO:0016020,GO:0044425,GO:0016021,GO:0031224	cellular_component,membrane,membrane part,integral to membrane,intrinsic to membrane	--	--
ENSSSCT00000013285	ENSSSCG00000012146	CTPS2	chrX:13996225-14092759	33.9699	26.3161	0.368312	0.01225	0.208341	CTP synthase 2 [Source:HGNC Symbol;Acc:HGNC:2520]	--	--	ssc00240,ssc01100	Pyrimidine metabolism,Metabolic pathways
ENSSSCT00000010028	ENSSSCG00000009157	TET2	chr8:125011419-125136835	23.9151	18.9285	0.33736	0.01525	0.238728	tet methylcytosine dioxygenase 2 [Source:HGNC Symbol;Acc:HGNC:25941]	--	--	--	--
ENSSSCT00000015610	ENSSSCG00000014287	SHROOM1	chr2:140617549-140626147	0.282476	0.473013	-0.743754	0.0294	0.343279	shroom family member 1 [Source:HGNC Symbol;Acc:HGNC:24084]	--	--	--	--
ENSSSCT00000002075	ENSSSCG00000001852	IDH2	chr7:60539332-60549480	170.851	124.833	0.452738	0.0015	0.0500542	isocitrate dehydrogenase [Source:RefSeq peptide;Acc:NP_001157479]	--	--	ssc00020,ssc01210,ssc04146,ssc01200,ssc01230,ssc00480,ssc01100	Citrate cycle (TCA cycle),2-Oxocarboxylic acid metabolism,Peroxisome,Carbon metabolism,Biosynthesis of amino acids,Glutathione metabolism,Metabolic pathways
ENSSSCT00000004829	ENSSSCG00000004368	PREP	chr1:80817005-80892383	11.2476	8.33794	0.431858	0.0123	0.208925	prolyl endopeptidase [Source:RefSeq peptide;Acc:NP_001004050]	--	--	--	--
ENSSSCT00000007554	ENSSSCG00000006899	RPL5	chr4:135982736-135990562	797.978	994.937	-0.318256	0.0294	0.343279	-	--	--	ssc03010	Ribosome
ENSSSCT00000009565	ENSSSCG00000008742	CD38	chr8:10731288-10781193	0.45592	0.160887	1.50274	0.00115	0.0410868	CD38 molecule [Source:HGNC Symbol;Acc:HGNC:1667]	--	--	ssc00760,ssc05169,ssc04020,ssc04972,ssc04921,ssc04970,ssc01100	Nicotinate and nicotinamide metabolism,Epstein-Barr virus infection,Calcium signaling pathway,Pancreatic secretion,Oxytocin signaling pathway,Salivary secretion,Metabolic pathways
ENSSSCT00000031897	ENSSSCG00000027797	-	chr5:35889681-36061995	68.8749	34.4183	1.0008	0.04445	0.425188	--	--	--	--	--
ENSSSCT00000027365	ENSSSCG00000021341	-	chr5:24601958-24604545	6.29179	4.41146	0.512215	0.03545	0.379571	--	--	--	--	--
ENSSSCT00000002539	ENSSSCG00000002281	CHURC1-FNTB	chr7:95472879-95508380	4.23966	3.31086	0.356742	0.043	0.419614	farnesyltransferase, CAAX box, beta [Source:RefSeq peptide;Acc:NP_001231609]	--	--	ssc00900	Terpenoid backbone biosynthesis
ENSSSCT00000019360	ENSSSCG00000017788	TP53I13	chr12:47714657-47718800	3.24638	5.39766	-0.733501	0.00085	0.0327147	tumor protein p53 inducible protein 13 [Source:HGNC Symbol;Acc:HGNC:25102]	--	--	--	--
ENSSSCT00000034589	ENSSSCG00000026173	ABCA1	chr1:275474264-275507927	144.132	109.246	0.399805	0.0151	0.237329	-	--	--	--	--
ENSSSCT00000022723	ENSSSCG00000007448	-	chr17:54443914-54450548	9.01776	6.19492	0.541684	0.0057	0.128755	--	--	--	--	--
ENSSSCT00000032748	ENSSSCG00000016573	IRF5	chr18:20747731-20760161	58.1936	43.1285	0.432221	0.0043	0.105867	interferon regulatory factor 5 [Source:HGNC Symbol;Acc:HGNC:6120]	--	--	ssc04620	Toll-like receptor signaling pathway
ENSSSCT00000011491	ENSSSCG00000010502	CCNJ	chr14:117154841-117176840	1.17696	0.625841	0.911202	0.00035	0.0164533	cyclin J [Source:HGNC Symbol;Acc:HGNC:23434]	GO:0044424,GO:0005622,GO:0043231,GO:0043229,GO:0043227,GO:0043226,GO:0005634,GO:0005575,GO:0005623,GO:0044464	intracellular part,intracellular,intracellular membrane-bounded organelle,intracellular organelle,membrane-bounded organelle,organelle,nucleus,cellular_component,cell,cell part	--	--
ENSSSCT00000011499	ENSSSCG00000010509	PIK3AP1	chr14:117674450-117788256	88.8717	68.7611	0.370132	0.00965	0.178931	phosphoinositide-3-kinase adaptor protein 1 [Source:HGNC Symbol;Acc:HGNC:30034]	--	--	ssc04662,ssc04151	B cell receptor signaling pathway,PI3K-Akt signaling pathway
ENSSSCT00000028373	ENSSSCG00000030010	RPL36	chr2:73808881-73810492	695.397	940.223	-0.435165	0.00165	0.0537245	ribosomal protein L36 [Source:HGNC Symbol;Acc:HGNC:13631]	--	--	ssc03010	Ribosome
ENSSSCT00000029024	ENSSSCG00000028790	ANKRD16	chr10:71224763-71238037	2.78446	3.92159	-0.494042	0.021	0.28715	ankyrin repeat domain 16 [Source:HGNC Symbol;Acc:HGNC:23471]	--	--	--	--
ENSSSCT00000014037	ENSSSCG00000012842	-	chr2:164438-166560	855.006	1144.56	-0.420782	0.0033	0.088885	--	--	--	ssc03010	Ribosome
ENSSSCT00000011231	ENSSSCG00000010261	PPA1	chr14:79052524-79087956	100.535	52.6767	0.932457	5e-05	0.00318682	pyrophosphatase (inorganic) 1 [Source:HGNC Symbol;Acc:HGNC:9226]	--	--	ssc00190	Oxidative phosphorylation
ENSSSCT00000011239	ENSSSCG00000010268	EIF4EBP2	chr14:79241137-79260436	5.57108	9.41104	-0.756397	0.0027	0.0773057	eukaryotic translation initiation factor 4E binding protein 2 [Source:HGNC Symbol;Acc:HGNC:3289]	--	--	--	--
ENSSSCT00000010724	ENSSSCG00000009782	ARL6IP4	chr14:31574585-31577393	11.6988	15.0412	-0.362564	0.02915	0.341589	ADP ribosylation factor like GTPase 6 interacting protein 4 [Source:HGNC Symbol;Acc:HGNC:18076]	--	--	--	--
ENSSSCT00000010720	ENSSSCG00000009778	RILPL2	chr14:31187804-31211475	98.2413	75.4063	0.381645	0.00745	0.154071	Rab interacting lysosomal protein-like 2 [Source:HGNC Symbol;Acc:HGNC:28787]	--	--	--	--
ENSSSCT00000010728	ENSSSCG00000009786	HIP1R	chr14:31685024-31713038	15.5902	19.4831	-0.321585	0.02715	0.328304	huntingtin interacting protein 1 related [Source:HGNC Symbol;Acc:HGNC:18415]	--	--	--	--
ENSSSCT00000007336	ENSSSCG00000006697	ACP6	chr4:109763759-109781621	12.2337	16.8913	-0.465421	0.0033	0.088885	acid phosphatase 6, lysophosphatidic [Source:HGNC Symbol;Acc:HGNC:29609]	--	--	ssc00740	Riboflavin metabolism
ENSSSCT00000007337	ENSSSCG00000006698	BCL9	chr4:109803775-109819766	0.576484	0.391382	0.558702	0.03445	0.374083	B-cell CLL/lymphoma 9 [Source:HGNC Symbol;Acc:HGNC:1008]	--	--	--	--
ENSSSCT00000005185	ENSSSCG00000004695	WDR76	chr1:142483491-142568978	7.93356	5.28054	0.587284	0.0008	0.0312581	WD repeat domain 76 [Source:HGNC Symbol;Acc:HGNC:25773]	GO:0005515,GO:0005488,GO:0003674	protein binding,binding,molecular_function	--	--
ENSSSCT00000005187	ENSSSCG00000004697	HYPK	chr1:142587864-142589341	40.1054	53.7001	-0.421129	0.0091	0.173126	huntingtin interacting protein K [Source:HGNC Symbol;Acc:HGNC:18418]	GO:0005515,GO:0005622,GO:0043226,GO:0043227,GO:0044424,GO:0005634,GO:0043229,GO:0005654,GO:0043231,GO:0044428,GO:0031974,GO:0005488,GO:0070013,GO:0031981,GO:0043233,GO:0043228,GO:0043232,GO:0044446,GO:0044464,GO:0005623,GO:0044422,GO:0015630,GO:0005856,GO:0003674,GO:0005575	protein binding,intracellular,organelle,membrane-bounded organelle,intracellular part,nucleus,intracellular organelle,nucleoplasm,intracellular membrane-bounded organelle,nuclear part,membrane-enclosed lumen,binding,intracellular organelle lumen,nuclear lumen,organelle lumen,non-membrane-bounded organelle,intracellular non-membrane-bounded organelle,intracellular organelle part,cell part,cell,org…	--	--
ENSSSCT00000009698	ENSSSCG00000008858	KLHL2	chr8:45678239-45785868	17.6052	22.8407	-0.375608	0.016	0.245825	kelch like family member 2 [Source:HGNC Symbol;Acc:HGNC:6353]	GO:0044424,GO:0005622,GO:0043229,GO:0005515,GO:0043226,GO:0005737,GO:0005575,GO:0043170,GO:0044260,GO:0004842,GO:0005488,GO:0019787,GO:0071704,GO:0032991,GO:0044238,GO:0031461,GO:0016881,GO:0016567,GO:0008152,GO:0019538,GO:0032446,GO:0044237,GO:0005623,GO:0015629,GO:0044267,GO:0070647,GO:0016874,GO:0016879,GO:0043412,GO:0000151,GO:0044464,GO:0043228,GO:0043232,GO:0006464,GO:0036211,GO:0003824,GO:…	intracellular part,intracellular,intracellular organelle,protein binding,organelle,cytoplasm,cellular_component,macromolecule metabolic process,cellular macromolecule metabolic process,ubiquitin-protein ligase activity,binding,small conjugating protein ligase activity,organic substance metabolic process,macromolecular complex,primary metabolic process,cullin-RING ubiquitin ligase complex,acid-ami…	--	--
ENSSSCT00000005231	ENSSSCG00000004735	-	chr1:144360846-144382433	88.7384	49.0598	0.855017	5e-05	0.00318682	--	--	--	--	--
ENSSSCT00000005741	ENSSSCG00000005209	-	chr1:242260281-242261266	0.545629	0.098545	2.46906	0.01245	0.210442	--	--	--	ssc03010,ssc04910,ssc05205,ssc04151,ssc04066,ssc04150	Ribosome,Insulin signaling pathway,Proteoglycans in cancer,PI3K-Akt signaling pathway,HIF-1 signaling pathway,mTOR signaling pathway
ENSSSCT00000005740	ENSSSCG00000005208	RIC1	chr1:242115103-242228450	47.2584	37.1132	0.348638	0.0107	0.191159	RIC1 homolog, RAB6A GEF complex partner 1 [Source:HGNC Symbol;Acc:HGNC:17686]	--	--	--	--
ENSSSCT00000005744	ENSSSCG00000005211	CD274	chr1:242396224-242416185	39.9606	16.001	1.32041	5e-05	0.00318682	CD274 molecule [Source:HGNC Symbol;Acc:HGNC:17635]	--	--	ssc04514	Cell adhesion molecules (CAMs)
ENSSSCT00000019650	ENSSSCG00000018055	PEMT	chr12:63139390-63150665	8.66929	11.1821	-0.367199	0.03325	0.367173	phosphatidylethanolamine N-methyltransferase [Source:HGNC Symbol;Acc:HGNC:8830]	--	--	ssc01100,ssc00564	Metabolic pathways,Glycerophospholipid metabolism
ENSSSCT00000014222	ENSSSCG00000013011	SAC3D1	chr2:6270449-6273674	5.79803	8.03722	-0.471135	0.02055	0.283648	SAC3 domain containing 1 [Source:HGNC Symbol;Acc:HGNC:30179]	--	--	--	--
ENSSSCT00000016605	ENSSSCG00000015238	ARHGAP32	chr9:61997168-62189255	1.7545	1.06485	0.720411	5e-05	0.00318682	Rho GTPase activating protein 32 [Source:HGNC Symbol;Acc:HGNC:17399]	--	--	--	--
ENSSSCT00000008472	ENSSSCG00000007727	-	chr3:14855654-14946253	2.48739	1.86224	0.417592	0.02485	0.312287	--	--	--	--	--
ENSSSCT00000024067	ENSSSCG00000027550	PLCD1	chr13:24826387-24847862	29.1585	36.6544	-0.330067	0.0201	0.279968	phospholipase C delta 1 [Source:HGNC Symbol;Acc:HGNC:9060]	--	--	ssc00562,ssc04070,ssc04919,ssc04020,ssc01100	Inositol phosphate metabolism,Phosphatidylinositol signaling system,Thyroid hormone signaling pathway,Calcium signaling pathway,Metabolic pathways
ENSSSCT00000010295	ENSSSCG00000009396	PHF11	chr11:18519920-18566731	91.0015	64.8904	0.487887	0.0004	0.0182909	PHD finger protein 11 [Source:HGNC Symbol;Acc:HGNC:17024]	--	--	--	--
ENSSSCT00000010294	ENSSSCG00000009395	SETDB2	chr11:18570453-18599086	19.9205	15.6895	0.344457	0.02165	0.292175	SET domain, bifurcated 2 [Source:HGNC Symbol;Acc:HGNC:20263]	--	--	ssc00310	Lysine degradation
ENSSSCT00000010290	ENSSSCG00000009391	-	chr11:18085026-18109816	18.7129	13.797	0.439675	0.01345	0.220922	importin subunit alpha-3 [Source:RefSeq peptide;Acc:NP_001177159]	--	--	--	--
ENSSSCT00000018190	ENSSSCG00000016709	SNX10	chr18:50840314-50858704	835.219	543.802	0.619072	5e-05	0.00318682	sorting nexin 10 [Source:HGNC Symbol;Acc:HGNC:14974]	--	--	--	--
ENSSSCT00000014991	ENSSSCG00000029347	ZNF791	chr2:66776800-66821681	7.24053	5.26665	0.459209	0.0096	0.178376	zinc finger protein 791 [Source:HGNC Symbol;Acc:HGNC:26895]	--	--	--	--
ENSSSCT00000028946	ENSSSCG00000022075	KCTD13	chr3:18629034-18633492	5.51503	3.62179	0.606666	0.00675	0.144443	potassium channel tetramerization domain containing 13 [Source:HGNC Symbol;Acc:HGNC:22234]	--	--	--	--
ENSSSCT00000028941	ENSSSCG00000028887	-	chr12:54213348-54229683	4.89318	2.69169	0.862262	0.00195	0.0608844	--	--	--	ssc04144,ssc00565,ssc04014,ssc00564,ssc04666,ssc04912,ssc04024,ssc04724,ssc01100	Endocytosis,Ether lipid metabolism,Ras signaling pathway,Glycerophospholipid metabolism,Fc gamma R-mediated phagocytosis,GnRH signaling pathway,cAMP signaling pathway,Glutamatergic synapse,Metabolic pathways
ENSSSCT00000028942	ENSSSCG00000025883	RPL37	GL893678.1:23832-27212	475.366	576.348	-0.277903	0.0473	0.439048	ribosomal protein L37 [Source:RefSeq peptide;Acc:NP_001230532]	GO:0044424,GO:0005737,GO:0044446,GO:0003674,GO:0003723,GO:0044422,GO:0043226,GO:0005622,GO:0043229,GO:0005829,GO:0008152,GO:0043228,GO:0043232,GO:0044391,GO:0006412,GO:0003735,GO:0044237,GO:0022625,GO:0071704,GO:0030529,GO:0015934,GO:0003676,GO:0044238,GO:0005840,GO:0022626,GO:0005488,GO:0044260,GO:0044267,GO:0019538,GO:0043170,GO:0019843,GO:0032991,GO:0009058,GO:1901363,GO:1901576,GO:0097159,GO:…	intracellular part,cytoplasm,intracellular organelle part,molecular_function,RNA binding,organelle part,organelle,intracellular,intracellular organelle,cytosol,metabolic process,non-membrane-bounded organelle,intracellular non-membrane-bounded organelle,ribosomal subunit,translation,structural constituent of ribosome,cellular metabolic process,cytosolic large ribosomal subunit,organic substance m…	ssc03010	Ribosome
ENSSSCT00000028943	ENSSSCG00000029531	-	GL894448.1:1201-33120	16.7935	5.95992	1.49454	5e-05	0.00318682	--	GO:0009615,GO:0051607,GO:0002252,GO:0051707,GO:0009607,GO:0002376,GO:0045087,GO:0051704,GO:0006955,GO:0006952,GO:0006950,GO:0009200,GO:0009262,GO:0009394,GO:0019692,GO:0002682,GO:0080134,GO:0031347,GO:0006203,GO:0008832,GO:0009151,GO:0009155,GO:0009204,GO:0009215,GO:0009217,GO:0009264,GO:0016793,GO:0046070,GO:0046386,GO:0043231,GO:0005634,GO:0043229,GO:0045088,GO:0048583,GO:0034655,GO:0009117,GO:…	response to virus,defense response to virus,immune effector process,response to other organism,response to biotic stimulus,immune system process,innate immune response,multi-organism process,immune response,defense response,response to stress,deoxyribonucleoside triphosphate metabolic process,deoxyribonucleotide metabolic process,2'-deoxyribonucleotide metabolic process,deoxyribose phosphate meta…	--	--
ENSSSCT00000028239	ENSSSCG00000026552	HIATL1	GL895478.1:12548-49081	92.2287	50.828	0.859593	5e-05	0.00318682	hippocampus abundant transcript-like protein 1 [Source:RefSeq peptide;Acc:NP_001230329]	GO:0005575,GO:0051179,GO:0044765,GO:0006810,GO:0051234,GO:0016020,GO:0044763,GO:0009987,GO:0044699,GO:0003674,GO:0008150,GO:0044425,GO:0055085,GO:0016021,GO:0031224,GO:0005215,GO:0022891,GO:0022857,GO:0022892	cellular_component,localization,single-organism transport,transport,establishment of localization,membrane,single-organism cellular process,cellular process,single-organism process,molecular_function,biological_process,membrane part,transmembrane transport,integral to membrane,intrinsic to membrane,transporter activity,substrate-specific transmembrane transporter activity,transmembrane transporte…	--	--
ENSSSCT00000010882	ENSSSCG00000009930	GLTP	chr14:43607372-43631579	58.7867	73.4352	-0.320982	0.0219	0.292912	glycolipid transfer protein [Source:HGNC Symbol;Acc:HGNC:24867]	--	--	--	--
ENSSSCT00000014172	ENSSSCG00000012965	DRAP1	chr2:5513473-5515508	129.989	159.102	-0.291564	0.0366	0.385741	DR1-associated protein 1 (negative cofactor 2 alpha) [Source:HGNC Symbol;Acc:HGNC:3019]	--	--	--	--
ENSSSCT00000014174	ENSSSCG00000012967	FOSL1	chr2:5534024-5541866	4.52374	6.24722	-0.465698	0.03065	0.351295	FOS-like antigen 1 [Source:HGNC Symbol;Acc:HGNC:13718]	--	--	ssc05166,ssc04380,ssc04310	HTLV-I infection,Osteoclast differentiation,Wnt signaling pathway
ENSSSCT00000006294	ENSSSCG00000005724	SETX	chr1:306154771-306228908	90.6416	28.0944	1.68989	5e-05	0.00318682	senataxin [Source:HGNC Symbol;Acc:HGNC:445]	GO:0010033,GO:0006950,GO:0071310,GO:0070887,GO:0042802,GO:0006302,GO:0042221,GO:0006979,GO:0034599,GO:0071396,GO:0005622,GO:0006281,GO:0044424,GO:0001147,GO:0001160,GO:0006369,GO:0030846,GO:0031554,GO:0060566,GO:2000804,GO:2000806,GO:0005737,GO:0050896,GO:0033993,GO:0043243,GO:0043229,GO:0042981,GO:0043067,GO:0007623,GO:0048519,GO:1901363,GO:0006353,GO:0010941,GO:0043231,GO:0097159,GO:2000144,GO:…	response to organic substance,response to stress,cellular response to organic substance,cellular response to chemical stimulus,identical protein binding,double-strand break repair,response to chemical stimulus,response to oxidative stress,cellular response to oxidative stress,cellular response to lipid,intracellular,DNA repair,intracellular part,transcription termination site sequence-specific DN…	--	--
ENSSSCT00000002141	ENSSSCG00000001912	PML	chr7:64026830-64071479	30.2901	6.17148	2.29516	5e-05	0.00318682	promyelocytic leukemia [Source:HGNC Symbol;Acc:HGNC:9113]	GO:0009615,GO:0051607,GO:0002252,GO:0048525,GO:0051707,GO:0009607,GO:0043901,GO:0045087,GO:0051704,GO:0006952,GO:0034097,GO:0050792,GO:0043903,GO:0019058,GO:0043900,GO:0010033,GO:0006950,GO:0071310,GO:0071345,GO:0016032,GO:0044764,GO:0006955,GO:0044403,GO:0044419,GO:0002376,GO:0070887,GO:0050897,GO:0031347,GO:0080134,GO:0042802,GO:0006302,GO:0042221,GO:0006979,GO:0034599,GO:0050688,GO:0002697,GO:…	response to virus,defense response to virus,immune effector process,negative regulation of viral process,response to other organism,response to biotic stimulus,negative regulation of multi-organism process,innate immune response,multi-organism process,defense response,response to cytokine stimulus,regulation of viral process,regulation of symbiosis, encompassing mutualism through parasitism,viral…	ssc05164,ssc05168,ssc04120,ssc05221,ssc05200,ssc04144,ssc05202	Influenza A,Herpes simplex infection,Ubiquitin mediated proteolysis,Acute myeloid leukemia,Pathways in cancer,Endocytosis,Transcriptional misregulation in cancer
ENSSSCT00000002142	ENSSSCG00000001913	STOML1	chr7:64073606-64082630	20.702	15.5476	0.413082	0.0063	0.138096	stomatin like 1 [Source:HGNC Symbol;Acc:HGNC:14560]	GO:0005515,GO:0005575,GO:0005488,GO:0016020,GO:0003674,GO:0044425,GO:0016021,GO:0031224	protein binding,cellular_component,binding,membrane,molecular_function,membrane part,integral to membrane,intrinsic to membrane	--	--
ENSSSCT00000003816	ENSSSCG00000003438	VPS13D	chr6:66313400-66638980	8.1506	6.66953	0.289321	0.03995	0.403429	vacuolar protein sorting 13 homolog D (S. cerevisiae) [Source:HGNC Symbol;Acc:HGNC:23595]	--	--	--	--
ENSSSCT00000031497	ENSSSCG00000002003	-	chr7:80411500-80425064	5.2919	3.30734	0.678115	0.02755	0.330908	--	--	--	--	--
ENSSSCT00000022379	ENSSSCG00000024207	PREX1	chr17:56828957-56862600	32.0795	22.4069	0.517705	0.0018	0.0573344	phosphatidylinositol-3,4,5-trisphosphate-dependent Rac exchange factor 1 [Source:HGNC Symbol;Acc:HGNC:32594]	--	--	--	--
ENSSSCT00000032432	ENSSSCG00000014177	CHD1	chr2:108968007-109061538	14.3196	11.2103	0.353165	0.0469	0.437259	chromodomain helicase DNA binding protein 1 [Source:HGNC Symbol;Acc:HGNC:1915]	--	--	--	--
ENSSSCT00000009404	ENSSSCG00000008593	KLHL29	chr3:122136103-122272144	1.69312	2.18707	-0.369313	0.0498	0.450218	kelch like family member 29 [Source:HGNC Symbol;Acc:HGNC:29404]	--	--	--	--
ENSSSCT00000013036	ENSSSCG00000011913	-	chr13:155528791-155568016	1.83796	1.06196	0.791368	0.00275	0.0782372	--	--	--	--	--
ENSSSCT00000012306	ENSSSCG00000011239	-	chr13:23827614-23843363	54.7728	15.2452	1.8451	5e-05	0.00318682	--	--	--	--	--
ENSSSCT00000011529	ENSSSCG00000010539	SLC25A28	chr14:120241401-120251848	46.3013	29.3518	0.657605	5e-05	0.00318682	solute carrier family 25 (mitochondrial iron transporter), member 28 [Source:HGNC Symbol;Acc:HGNC:23472]	--	--	--	--
ENSSSCT00000015417	ENSSSCG00000014114	PAPD4	chr2:90128251-90181088	31.4865	20.5493	0.615645	5e-05	0.00318682	PAP associated domain containing 4 [Source:HGNC Symbol;Acc:HGNC:26776]	GO:0002376,GO:0030097,GO:0048534,GO:0002520,GO:0002244,GO:0004652,GO:0008334,GO:0071044,GO:0043231,GO:0005634,GO:0043229,GO:0043631,GO:0070566,GO:0048513,GO:0006401,GO:0034655,GO:0005515,GO:0044248,GO:0044270,GO:0046700,GO:0005488,GO:0019439,GO:1901361,GO:0044424,GO:0003824,GO:0043227,GO:0043226,GO:0005622,GO:0031123,GO:0009056,GO:0016740,GO:0016779,GO:0000956,GO:0007275,GO:0006402,GO:0030154,GO:…	immune system process,hemopoiesis,hematopoietic or lymphoid organ development,immune system development,hematopoietic progenitor cell differentiation,polynucleotide adenylyltransferase activity,histone mRNA metabolic process,histone mRNA catabolic process,intracellular membrane-bounded organelle,nucleus,intracellular organelle,RNA polyadenylation,adenylyltransferase activity,organ development,RNA…	--	--
ENSSSCT00000009362	ENSSSCG00000008557	EMILIN1	chr3:119030263-119038488	0.489271	0.807608	-0.72302	0.00615	0.135821	elastin microfibril interfacer 1 [Source:HGNC Symbol;Acc:HGNC:19880]	--	--	--	--
ENSSSCT00000009367	ENSSSCG00000008562	SLC35F6	chr3:119279960-119296228	33.9192	22.8228	0.571625	0.0001	0.00583627	solute carrier family 35 member F6 [Source:HGNC Symbol;Acc:HGNC:26055]	--	--	--	--
ENSSSCT00000001625	ENSSSCG00000001463	-	chr7:29283698-29288735	17.2541	12.4236	0.47386	0.0127	0.213021	--	--	--	ssc03050	Proteasome
ENSSSCT00000001620	ENSSSCG00000025593	-	chr7:29257058-29268365	1.21445	0.606412	1.00193	0.0006	0.0250653	--	--	--	ssc05168,ssc02010,ssc04612,ssc05340,ssc04145	Herpes simplex infection,ABC transporters,Antigen processing and presentation,Primary immunodeficiency,Phagosome
ENSSSCT00000001623	ENSSSCG00000028872	PSMB8	chr7:29425066-29428872	68.7713	48.7965	0.495028	0.00105	0.0383399	proteasome subunit beta type-8 [Source:RefSeq peptide;Acc:NP_999100]	--	--	ssc03050	Proteasome
ENSSSCT00000001629	ENSSSCG00000025173	TAP2	chr7:29412164-29423473	5.58047	2.76362	1.01383	5e-05	0.00318682	-	--	--	ssc05168,ssc05340,ssc02010,ssc04612,ssc04145	Herpes simplex infection,Primary immunodeficiency,ABC transporters,Antigen processing and presentation,Phagosome
ENSSSCT00000007287	ENSSSCG00000006651	ADAMTSL4	chr4:107824819-107833437	3.68264	2.74046	0.426323	0.0186	0.267681	ADAMTS like 4 [Source:HGNC Symbol;Acc:HGNC:19706]	--	--	--	--
ENSSSCT00000030501	ENSSSCG00000024125	-	chr11:18284858-18292470	16.9813	12.0703	0.492482	0.0007	0.0281778	--	--	--	--	--
ENSSSCT00000008966	ENSSSCG00000008187	-	chr3:58021312-58040774	1.42128	0.915563	0.634459	0.01965	0.276334	--	--	--	--	--
ENSSSCT00000031752	ENSSSCG00000022265	C19orf25	chr2:77891285-77895615	13.6304	18.6781	-0.454524	0.00355	0.0927658	chromosome 19 open reading frame 25 [Source:HGNC Symbol;Acc:HGNC:26711]	--	--	--	--
ENSSSCT00000031754	ENSSSCG00000020912	HECTD2	chr14:112475113-112561421	2.90711	2.23856	0.377013	0.03875	0.397194	HECT domain containing E3 ubiquitin protein ligase 2 [Source:HGNC Symbol;Acc:HGNC:26736]	GO:0044424,GO:0005737,GO:0003674,GO:0005622,GO:0008152,GO:0044237,GO:0004842,GO:0071704,GO:0016567,GO:0016881,GO:0032446,GO:0044238,GO:0019787,GO:0044260,GO:0003824,GO:0044267,GO:0019538,GO:0016879,GO:0043170,GO:0070647,GO:0016874,GO:0005575,GO:0005623,GO:0044464,GO:0006464,GO:0036211,GO:0009987,GO:0043412,GO:0008150	intracellular part,cytoplasm,molecular_function,intracellular,metabolic process,cellular metabolic process,ubiquitin-protein ligase activity,organic substance metabolic process,protein ubiquitination,acid-amino acid ligase activity,protein modification by small protein conjugation,primary metabolic process,small conjugating protein ligase activity,cellular macromolecule metabolic process,catalyti…	--	--
ENSSSCT00000033993	ENSSSCG00000006378	SLAMF7	chr4:97461922-97479289	24.4765	13.9962	0.806363	0.0243	0.308385	SLAM family member 7 [Source:HGNC Symbol;Acc:HGNC:21394]	--	--	--	--
ENSSSCT00000028048	ENSSSCG00000024756	-	chr6:732781-741809	13.2949	16.9102	-0.347018	0.03535	0.378998	--	--	--	--	--
ENSSSCT00000014304	ENSSSCG00000013086	CYB561A3	chr2:9694929-9703036	18.205	13.1205	0.472516	0.0138	0.224499	cytochrome b561 family member A3 [Source:HGNC Symbol;Acc:HGNC:23014]	--	--	--	--
ENSSSCT00000029311	ENSSSCG00000022820	VAMP8	chr3:62248968-62254204	467.384	582.168	-0.316827	0.02305	0.30122	vesicle associated membrane protein 8 [Source:HGNC Symbol;Acc:HGNC:12647]	--	--	ssc04130,ssc04611	SNARE interactions in vesicular transport,Platelet activation
ENSSSCT00000017573	ENSSSCG00000016140	FZD5	chr15:122425804-122428979	1.7118	1.25405	0.448915	0.04585	0.431931	frizzled class receptor 5 [Source:HGNC Symbol;Acc:HGNC:4043]	--	--	ssc05200,ssc04916,ssc05217,ssc04390,ssc05205,ssc05166,ssc04310,ssc04550	Pathways in cancer,Melanogenesis,Basal cell carcinoma,Hippo signaling pathway,Proteoglycans in cancer,HTLV-I infection,Wnt signaling pathway,Signaling pathways regulating pluripotency of stem cells
ENSSSCT00000016190	ENSSSCG00000014838	PGM2L1	chr9:9531927-9564301	5.38279	7.52655	-0.483633	0.0081	0.161777	phosphoglucomutase 2-like 1 [Source:HGNC Symbol;Acc:HGNC:20898]	--	--	ssc00500	Starch and sucrose metabolism
ENSSSCT00000018684	ENSSSCG00000017160	CBX4	chr12:2591046-2597546	2.46591	3.38774	-0.4582	0.0225	0.29772	chromobox 4 [Source:HGNC Symbol;Acc:HGNC:1554]	--	--	--	--
ENSSSCT00000018682	ENSSSCG00000017158	-	chr12:2412538-2453514	0.345248	0.673413	-0.963861	0.0037	0.095487	--	--	--	--	--
ENSSSCT00000018353	ENSSSCG00000016853	RICTOR	chr16:25361447-25498073	31.0268	23.0468	0.428948	0.0016	0.0524968	RPTOR independent companion of MTOR, complex 2 [Source:HGNC Symbol;Acc:HGNC:28611]	GO:0006952,GO:0006950,GO:0044424,GO:0005622,GO:0005515,GO:0080134,GO:0031347,GO:0050731,GO:0071704,GO:0010467,GO:0009605,GO:0051130,GO:0044237,GO:0032268,GO:0051246,GO:0005488,GO:0032502,GO:0031399,GO:0048518,GO:0007163,GO:0090066,GO:0044238,GO:0005575,GO:0030010,GO:0010638,GO:0019222,GO:0007275,GO:0048583,GO:0065008,GO:0050730,GO:0008152,GO:0001932,GO:0010627,GO:0044267,GO:0019538,GO:0051495,GO:…	defense response,response to stress,intracellular part,intracellular,protein binding,regulation of response to stress,regulation of defense response,positive regulation of peptidyl-tyrosine phosphorylation,organic substance metabolic process,gene expression,response to external stimulus,positive regulation of cellular component organization,cellular metabolic process,regulation of cellular protei…	ssc04150	mTOR signaling pathway
ENSSSCT00000009612	ENSSSCG00000008786	-	chr8:31769681-31790270	19.741	1.17219	4.07391	5e-05	0.00318682	--	GO:0044425,GO:0016020,GO:0005575,GO:0016021,GO:0031224	membrane part,membrane,cellular_component,integral to membrane,intrinsic to membrane	--	--
ENSSSCT00000007614	ENSSSCG00000006949	MCOLN3	chr4:143385062-143394296	30.6823	23.095	0.409824	0.01535	0.239693	-	--	--	--	--
ENSSSCT00000007611	ENSSSCG00000006947	SYDE2	chr4:143280355-143325628	1.53253	2.23361	-0.543465	0.01185	0.204059	synapse defective 1, Rho GTPase, homolog 2 (C. elegans) [Source:HGNC Symbol;Acc:HGNC:25841]	--	--	--	--
ENSSSCT00000028528	ENSSSCG00000027073	-	chr9:82405278-82429666	10.4884	13.2109	-0.332929	0.042	0.414455	--	GO:0042221,GO:0050896,GO:0004064,GO:0003824,GO:0016787,GO:0016788,GO:0009636,GO:0003674,GO:0005575,GO:0052689,GO:0005576,GO:0008152,GO:0008150	response to chemical stimulus,response to stimulus,arylesterase activity,catalytic activity,hydrolase activity,hydrolase activity, acting on ester bonds,response to toxic substance,molecular_function,cellular_component,carboxylic ester hydrolase activity,extracellular region,metabolic process,biological_process	ssc01100	Metabolic pathways
ENSSSCT00000022525	ENSSSCG00000026715	YPEL3	GL892494.1:606-3583	27.6238	37.1002	-0.425513	0.0058	0.130375	yippee like 3 [Source:HGNC Symbol;Acc:HGNC:18327]	--	--	--	--
ENSSSCT00000005928	ENSSSCG00000005386	STX17	chr1:269898455-270003564	11.4383	8.21376	0.477756	0.0011	0.0397093	syntaxin 17 [Source:HGNC Symbol;Acc:HGNC:11432]	--	--	ssc04130	SNARE interactions in vesicular transport
ENSSSCT00000034567	ENSSSCG00000015390	ABCB1	chr9:102544382-102626450	1.07876	0.434498	1.31194	0.0004	0.0182909	ATP-binding cassette, sub-family B (MDR/TAP), member 1 [Source:RefSeq peptide;Acc:NP_001295175]	GO:0005575,GO:0097159,GO:1901363,GO:0005488,GO:0000166,GO:1901265,GO:0036094,GO:0008152,GO:0051179,GO:0003824,GO:0032555,GO:0017076,GO:0032553,GO:0044765,GO:0035639,GO:0001883,GO:0032550,GO:0001882,GO:0032549,GO:0006810,GO:0051234,GO:0016020,GO:0043167,GO:0043168,GO:0032559,GO:0030554,GO:0005524,GO:0044763,GO:0017111,GO:0009987,GO:0016462,GO:0016787,GO:0016818,GO:0016817,GO:0016887,GO:0042626,GO:…	cellular_component,organic cyclic compound binding,heterocyclic compound binding,binding,nucleotide binding,nucleoside phosphate binding,small molecule binding,metabolic process,localization,catalytic activity,purine ribonucleotide binding,purine nucleotide binding,ribonucleotide binding,single-organism transport,purine ribonucleoside triphosphate binding,purine nucleoside binding,purine ribonucl…	ssc02010,ssc04976,ssc05206	ABC transporters,Bile secretion,MicroRNAs in cancer
ENSSSCT00000000833	ENSSSCG00000000769	BID	chr5:72118716-72143297	52.5254	31.6847	0.729232	5e-05	0.00318682	BH3 interacting domain death agonist [Source:HGNC Symbol;Acc:HGNC:1050]	--	--	ssc05152,ssc04115,ssc05014,ssc04210,ssc05416,ssc04932,ssc05010,ssc05200,ssc04650	Tuberculosis,p53 signaling pathway,Amyotrophic lateral sclerosis (ALS),Apoptosis,Viral myocarditis,Non-alcoholic fatty liver disease (NAFLD),Alzheimer's disease,Pathways in cancer,Natural killer cell mediated cytotoxicity
ENSSSCT00000000837	ENSSSCG00000000773	TUBAL3	chr5:72507679-72527225	2.06979	1.22186	0.760405	0.0072	0.150694	tubulin alpha like 3 [Source:HGNC Symbol;Acc:HGNC:23534]	--	--	ssc04145,ssc04540	Phagosome,Gap junction
ENSSSCT00000000838	ENSSSCG00000000774	USP18	chr5:72536454-72596714	94.1245	20.7434	2.18192	5e-05	0.00318682	-	--	--	--	--
ENSSSCT00000018115	ENSSSCG00000016637	TFEC	chr18:32208622-32286915	154.733	111.208	0.476517	0.00085	0.0327147	transcription factor EC [Source:HGNC Symbol;Acc:HGNC:11754]	GO:0006950,GO:0005515,GO:0005622,GO:0043226,GO:0043227,GO:0044424,GO:0005634,GO:0005737,GO:0043229,GO:0005654,GO:0043231,GO:0044428,GO:0031974,GO:0005488,GO:0070013,GO:0031981,GO:0043233,GO:0033554,GO:0044446,GO:0044464,GO:0005623,GO:0048522,GO:0044422,GO:0048518,GO:1901360,GO:0046483,GO:0006139,GO:0003674,GO:0034641,GO:0006725,GO:0044699,GO:0003676,GO:0006807,GO:0090304,GO:0005575,GO:0034605,GO:…	response to stress,protein binding,intracellular,organelle,membrane-bounded organelle,intracellular part,nucleus,cytoplasm,intracellular organelle,nucleoplasm,intracellular membrane-bounded organelle,nuclear part,membrane-enclosed lumen,binding,intracellular organelle lumen,nuclear lumen,organelle lumen,cellular response to stress,intracellular organelle part,cell part,cell,positive regulation of…	--	--
ENSSSCT00000032394	ENSSSCG00000023400	ZNF598	chr3:42208934-42218882	6.29331	4.4641	0.495451	0.00365	0.0945852	zinc finger protein 598 [Source:HGNC Symbol;Acc:HGNC:28079]	--	--	--	--
ENSSSCT00000032023	ENSSSCG00000014672	TRIM6	chr9:4689734-4720219	11.4531	5.21359	1.13539	5e-05	0.00318682	-	--	--	--	--
ENSSSCT00000027761	ENSSSCG00000021019	-	GL893241.2:1113-8273	1.99716	3.36102	-0.75095	0.00065	0.026683	--	GO:0005575,GO:0016020,GO:0044425,GO:0016021,GO:0031224	cellular_component,membrane,membrane part,integral to membrane,intrinsic to membrane	--	--
ENSSSCT00000018964	ENSSSCG00000017420	CNP	chr12:21047672-21055845	22.7259	10.9121	1.0584	5e-05	0.00318682	2',3'-cyclic nucleotide 3' phosphodiesterase [Source:HGNC Symbol;Acc:HGNC:2158]	--	--	--	--
ENSSSCT00000018960	ENSSSCG00000017416	DHX58	chr12:20937867-20946850	47.9001	8.50444	2.49374	5e-05	0.00318682	DEXH (Asp-Glu-X-His) box polypeptide 58 [Source:HGNC Symbol;Acc:HGNC:29517]	--	--	ssc04622	RIG-I-like receptor signaling pathway
ENSSSCT00000029106	ENSSSCG00000021223	CMTM6	chr13:20261231-20287139	109.029	87.863	0.311382	0.026	0.320421	CKLF-like MARVEL transmembrane domain containing 6 [Source:HGNC Symbol;Acc:HGNC:19177]	--	--	--	--
ENSSSCT00000017431	ENSSSCG00000016009	ITGA4	chr15:96521133-96637212	31.6956	38.54	-0.282075	0.04645	0.434918	integrin subunit alpha 4 [Source:HGNC Symbol;Acc:HGNC:6140]	--	--	ssc04640,ssc05140,ssc04151,ssc05412,ssc04672,ssc04810,ssc04510,ssc05414,ssc04514,ssc04512,ssc04670,ssc05410	Hematopoietic cell lineage,Leishmaniasis,PI3K-Akt signaling pathway,Arrhythmogenic right ventricular cardiomyopathy (ARVC),Intestinal immune network for IgA production,Regulation of actin cytoskeleton,Focal adhesion,Dilated cardiomyopathy,Cell adhesion molecules (CAMs),ECM-receptor interaction,Leukocyte transendothelial migration,Hypertrophic cardiomyopathy (HCM)
ENSSSCT00000011177	ENSSSCG00000010211	CCDC6	chr14:68153445-68274345	9.92175	6.52893	0.603747	0.00015	0.0082355	coiled-coil domain containing 6 [Source:HGNC Symbol;Acc:HGNC:18782]	--	--	ssc05200,ssc05216	Pathways in cancer,Thyroid cancer
ENSSSCT00000004157	ENSSSCG00000003755	MCOLN2	chr6:119212825-119273364	2.77734	1.67999	0.725255	0.0012	0.0424417	mucolipin 2 [Source:HGNC Symbol;Acc:HGNC:13357]	--	--	--	--
ENSSSCT00000009132	ENSSSCG00000008339	GFPT1	chr3:76459923-76509989	97.2144	74.5104	0.383728	0.00625	0.13733	glutamine--fructose-6-phosphate transaminase 1 [Source:HGNC Symbol;Acc:HGNC:4241]	--	--	ssc00520,ssc01100,ssc00250	Amino sugar and nucleotide sugar metabolism,Metabolic pathways,Alanine, aspartate and glutamate metabolism
ENSSSCT00000004950	ENSSSCG00000004480	COX7A2	chr1:101726687-101890065	437.859	559.303	-0.353162	0.01015	0.184816	cytochrome c oxidase subunit VIIa polypeptide 2 (liver) [Source:HGNC Symbol;Acc:HGNC:2288]	--	--	ssc04932,ssc05010,ssc05016,ssc00190,ssc05012,ssc04260	Non-alcoholic fatty liver disease (NAFLD),Alzheimer's disease,Huntington's disease,Oxidative phosphorylation,Parkinson's disease,Cardiac muscle contraction
ENSSSCT00000004958	ENSSSCG00000004487	MTO1	chr1:103500010-103525341	11.4754	8.45269	0.441061	0.00595	0.132748	mitochondrial tRNA translation optimization 1 [Source:HGNC Symbol;Acc:HGNC:19261]	--	--	--	--
ENSSSCT00000007427	ENSSSCG00000006781	CTTNBP2NL	chr4:118026417-118081234	38.5384	25.9722	0.569329	5e-05	0.00318682	CTTNBP2 N-terminal like [Source:HGNC Symbol;Acc:HGNC:25330]	--	--	--	--
ENSSSCT00000007422	ENSSSCG00000006776	MOV10	chr4:117822827-117848382	66.8047	34.4224	0.956603	5e-05	0.00318682	Mov10 RISC complex RNA helicase [Source:HGNC Symbol;Acc:HGNC:7200]	--	--	--	--
ENSSSCT00000007423	ENSSSCG00000006777	RHOC	chr4:117848596-117854870	219.058	268.824	-0.295347	0.03195	0.359253	ras homolog family member C [Source:HGNC Symbol;Acc:HGNC:669]	--	--	--	--
ENSSSCT00000026565	ENSSSCG00000024692	RRBP1	chr17:29460234-29499274	41.5315	33.6629	0.303047	0.0277	0.331943	ribosome binding protein 1 [Source:HGNC Symbol;Acc:HGNC:10448]	--	--	ssc04141	Protein processing in endoplasmic reticulum
ENSSSCT00000008223	ENSSSCG00000007508	ZBP1	chr17:65136535-65146713	104.811	13.5026	2.95649	5e-05	0.00318682	Z-DNA binding protein 1 [Source:HGNC Symbol;Acc:HGNC:16176]	--	--	ssc04623	Cytosolic DNA-sensing pathway
ENSSSCT00000017258	ENSSSCG00000015850	DUSP4	chr15:62906028-62923416	13.4422	9.85213	0.448265	0.004	0.100586	dual specificity phosphatase 4 [Source:HGNC Symbol;Acc:HGNC:3070]	--	--	ssc04010	MAPK signaling pathway
ENSSSCT00000023238	ENSSSCG00000023868	C3AR1	GL896371.1:25479-26910	44.0583	19.3085	1.19018	5e-05	0.00318682	complement component 3a receptor 1 [Source:HGNC Symbol;Acc:HGNC:1319]	GO:0002376,GO:0005622,GO:0044424,GO:0005829,GO:0002682,GO:0005737,GO:0004942,GO:0004943,GO:0010758,GO:0010759,GO:0071674,GO:0071675,GO:0044464,GO:0007204,GO:0005623,GO:0048522,GO:0048731,GO:0032879,GO:0006935,GO:0042330,GO:0048246,GO:0007275,GO:0051480,GO:0070887,GO:0045765,GO:1901342,GO:0048518,GO:0007610,GO:0071622,GO:0071624,GO:0090022,GO:0090023,GO:0065008,GO:0048856,GO:0001817,GO:0006874,GO:…	immune system process,intracellular,intracellular part,cytosol,regulation of immune system process,cytoplasm,anaphylatoxin receptor activity,C3a anaphylatoxin receptor activity,regulation of macrophage chemotaxis,positive regulation of macrophage chemotaxis,mononuclear cell migration,regulation of mononuclear cell migration,cell part,elevation of cytosolic calcium ion concentration,cell,positive …	ssc05150,ssc04610,ssc04080	Staphylococcus aureus infection,Complement and coagulation cascades,Neuroactive ligand-receptor interaction
ENSSSCT00000029805	ENSSSCG00000027544	-	GL894842.1:1102-13375	0.19381	0.475202	-1.2939	0.03485	0.376314	--	GO:0044424,GO:0044446,GO:0003674,GO:0044422,GO:0043226,GO:0005622,GO:0043229,GO:0008152,GO:0043228,GO:0043232,GO:0003824,GO:0032991,GO:0016787,GO:0005575,GO:0005623,GO:0016462,GO:0016818,GO:0016817,GO:0044464,GO:0017111,GO:0016192,GO:0016459,GO:0043234,GO:0008150,GO:0003774,GO:0051179,GO:0015629,GO:0016020,GO:0044430,GO:0005856,GO:0051234,GO:0006810	intracellular part,intracellular organelle part,molecular_function,organelle part,organelle,intracellular,intracellular organelle,metabolic process,non-membrane-bounded organelle,intracellular non-membrane-bounded organelle,catalytic activity,macromolecular complex,hydrolase activity,cellular_component,cell,pyrophosphatase activity,hydrolase activity, acting on acid anhydrides, in phosphorus-cont…	--	--
ENSSSCT00000013962	ENSSSCG00000012771	-	chrX:142008588-142017917	6.36949	4.48281	0.506774	0.0031	0.0850105	--	--	--	--	--
ENSSSCT00000015491	ENSSSCG00000014179	FAM174A	chr2:110536478-110563848	5.54975	7.02689	-0.340464	0.0485	0.444636	family with sequence similarity 174 member A [Source:HGNC Symbol;Acc:HGNC:24943]	--	--	--	--
ENSSSCT00000015497	ENSSSCG00000014184	PAM	chr2:112397802-112553942	10.9105	8.57129	0.348128	0.02375	0.30447	peptidylglycine alpha-amidating monooxygenase [Source:HGNC Symbol;Acc:HGNC:8596]	--	--	--	--
ENSSSCT00000025115	ENSSSCG00000024172	PAFAH2	chr6:77047030-77082452	8.02576	6.52064	0.299625	0.04255	0.417358	platelet-activating factor acetylhydrolase 2 [Source:HGNC Symbol;Acc:HGNC:8579]	--	--	ssc00565,ssc01100	Ether lipid metabolism,Metabolic pathways
ENSSSCT00000005518	ENSSSCG00000005003	-	chr1:199694830-199696984	1123.22	1472.1	-0.390229	0.00585	0.131178	--	--	--	ssc03010	Ribosome
ENSSSCT00000010616	ENSSSCG00000009682	HMBOX1	chr14:13933472-14124611	6.74886	4.6029	0.552103	0.0247	0.311131	homeobox containing 1 [Source:HGNC Symbol;Acc:HGNC:26137]	--	--	--	--
ENSSSCT00000010614	ENSSSCG00000009680	EXTL3	chr14:13661634-13712774	4.54542	3.55073	0.356299	0.0321	0.360165	exostosin-like glycosyltransferase 3 [Source:HGNC Symbol;Acc:HGNC:3518]	--	--	ssc00534,ssc01100	Glycosaminoglycan biosynthesis - heparan sulfate / heparin,Metabolic pathways
ENSSSCT00000001518	ENSSSCG00000001394	MIC-2	chr7:27223009-27233917	14.1178	5.63525	1.32496	5e-05	0.00318682	-	--	--	--	--
ENSSSCT00000003917	ENSSSCG00000003526	C1QB	chr6:74625258-74629862	23.1629	30.4871	-0.396381	0.0194	0.27418	-	--	--	ssc05150,ssc05020,ssc05142,ssc05322,ssc05133,ssc04610	Staphylococcus aureus infection,Prion diseases,Chagas disease (American trypanosomiasis),Systemic lupus erythematosus,Pertussis,Complement and coagulation cascades
ENSSSCT00000024454	ENSSSCG00000024793	PORCN	chrX:47628881-47644405	0.345471	0.74883	-1.11607	0.02235	0.296525	porcupine homolog (Drosophila) [Source:HGNC Symbol;Acc:HGNC:17652]	GO:0044424,GO:0043235,GO:0005622,GO:0043231,GO:0043229,GO:0043227,GO:0005515,GO:0043226,GO:0005737,GO:0005783,GO:0009058,GO:1901576,GO:0044249,GO:0034645,GO:0044444,GO:0009059,GO:0005575,GO:0043170,GO:0044260,GO:0044446,GO:0005488,GO:0045234,GO:0044422,GO:0071704,GO:0032991,GO:0044238,GO:0042157,GO:0008152,GO:0019538,GO:0065007,GO:0044237,GO:0006497,GO:0005623,GO:0050789,GO:0044432,GO:0044267,GO:…	intracellular part,receptor complex,intracellular,intracellular membrane-bounded organelle,intracellular organelle,membrane-bounded organelle,protein binding,organelle,cytoplasm,endoplasmic reticulum,biosynthetic process,organic substance biosynthetic process,cellular biosynthetic process,cellular macromolecule biosynthetic process,cytoplasmic part,macromolecule biosynthetic process,cellular_comp…	ssc04310	Wnt signaling pathway
ENSSSCT00000031067	ENSSSCG00000029691	CORO1A	GL892962.1:1450-5468	47.758	60.4029	-0.338877	0.0169	0.254092	coronin, actin binding protein, 1A [Source:HGNC Symbol;Acc:HGNC:2252]	GO:0002252,GO:0002376,GO:0045087,GO:0006955,GO:0006950,GO:0034097,GO:0006952,GO:0005515,GO:0071345,GO:0005622,GO:0043226,GO:0048523,GO:0070670,GO:0071353,GO:0043227,GO:0044424,GO:0048519,GO:0002682,GO:0005737,GO:0043229,GO:0043231,GO:0001772,GO:0008284,GO:0042110,GO:0046649,GO:0005488,GO:0051649,GO:0002285,GO:0051051,GO:0051641,GO:0043228,GO:0043232,GO:0051129,GO:0051130,GO:0010639,GO:0046907,GO:…	immune effector process,immune system process,innate immune response,immune response,response to stress,response to cytokine stimulus,defense response,protein binding,cellular response to cytokine stimulus,intracellular,organelle,negative regulation of cellular process,response to interleukin-4,cellular response to interleukin-4,membrane-bounded organelle,intracellular part,negative regulation of…	ssc05152,ssc04145	Tuberculosis,Phagosome
ENSSSCT00000006637	ENSSSCG00000006048	DCAF13	chr4:36445459-36477121	47.8156	60.6309	-0.342573	0.01455	0.231949	DDB1 and CUL4 associated factor 13 [Source:HGNC Symbol;Acc:HGNC:24535]	--	--	--	--
ENSSSCT00000022857	ENSSSCG00000023362	RHBDF2	chr12:4861483-4888174	25.5794	19.3945	0.399336	0.0058	0.130375	rhomboid 5 homolog 2 (Drosophila) [Source:HGNC Symbol;Acc:HGNC:20788]	--	--	--	--
ENSSSCT00000006989	ENSSSCG00000006378	SLAMF7	chr4:97461922-97479289	39.8766	19.612	1.0238	5e-05	0.00318682	SLAM family member 7 [Source:HGNC Symbol;Acc:HGNC:21394]	--	--	--	--
ENSSSCT00000007583	ENSSSCG00000006923	GBP2	chr4:139612346-139633862	17.8443	6.5629	1.44305	5e-05	0.00318682	-	--	--	--	--
ENSSSCT00000007585	ENSSSCG00000024973	GBP5	chr4:139413790-139425247	1.83032	1.13038	0.695289	0.01195	0.205099	guanylate binding protein 5 [Source:HGNC Symbol;Acc:HGNC:19895]	--	--	--	--
ENSSSCT00000007584	ENSSSCG00000006924	GBP1	chr4:139650957-139667272	85.4083	21.0739	2.01892	5e-05	0.00318682	-	--	--	--	--
ENSSSCT00000030005	ENSSSCG00000030589	HS3ST3A1	chr12:60547681-60649210	11.293	15.2678	-0.435071	0.00595	0.132748	heparan sulfate-glucosamine 3-sulfotransferase 3A1 [Source:HGNC Symbol;Acc:HGNC:5196]	--	--	ssc00534	Glycosaminoglycan biosynthesis - heparan sulfate / heparin
ENSSSCT00000018626	ENSSSCG00000017108	-	chr16:82434350-82446247	7.24051	5.25718	0.461802	0.0194	0.27418	--	--	--	--	--
ENSSSCT00000018603	ENSSSCG00000017087	GM2A	chr16:77974388-77987649	342.141	224.712	0.606518	0.0001	0.00583627	GM2 ganglioside activator [Source:HGNC Symbol;Acc:HGNC:4367]	--	--	ssc04142	Lysosome
ENSSSCT00000008580	ENSSSCG00000007830	RBBP6	chr3:22536764-22570041	8.53686	6.11537	0.481267	0.0015	0.0500542	retinoblastoma binding protein 6 [Source:HGNC Symbol;Acc:HGNC:9889]	--	--	--	--
ENSSSCT00000034069	ENSSSCG00000016113	BMPR2	chr15:117425963-117597333	18.8515	15.0351	0.326345	0.0333	0.367536	bone morphogenetic protein receptor type II [Source:HGNC Symbol;Acc:HGNC:1078]	--	--	ssc04060,ssc04390,ssc04350,ssc05206,ssc04550	Cytokine-cytokine receptor interaction,Hippo signaling pathway,TGF-beta signaling pathway,MicroRNAs in cancer,Signaling pathways regulating pluripotency of stem cells
ENSSSCT00000012965	ENSSSCG00000011853	RUBCN	chr13:143896452-143947326	12.2696	8.20797	0.579991	0.0004	0.0182909	RUN domain and cysteine-rich domain containing, Beclin 1-interacting protein [Source:HGNC Symbol;Acc:HGNC:28991]	--	--	--	--
ENSSSCT00000012969	ENSSSCG00000011856	-	chr13:144183621-144186429	1620.93	2079.78	-0.359612	0.0088	0.170324	--	--	--	ssc03010	Ribosome
ENSSSCT00000014600	ENSSSCG00000013368	HPS5	chr2:43963544-44007112	35.9927	28.9182	0.315725	0.02155	0.291494	Hermansky-Pudlak syndrome 5 [Source:HGNC Symbol;Acc:HGNC:17022]	--	--	--	--
ENSSSCT00000009245	ENSSSCG00000008443	EPAS1	chr3:100173611-100213334	59.4478	48.7946	0.284903	0.0486	0.445015	endothelial PAS domain-containing protein 1 [Source:RefSeq peptide;Acc:NP_001090889]	--	--	ssc05200,ssc05211	Pathways in cancer,Renal cell carcinoma
ENSSSCT00000023371	ENSSSCG00000027551	NUDT15	chr11:20025118-20037565	1.70886	2.47243	-0.532897	0.0474	0.439536	nudix hydrolase 15 [Source:HGNC Symbol;Acc:HGNC:23063]	--	--	--	--
ENSSSCT00000029618	ENSSSCG00000027836	-	chr8:30793178-30793670	24.2623	17.3529	0.483536	0.02725	0.32896	--	--	--	--	--
ENSSSCT00000011440	ENSSSCG00000010454	IFIT5	chr14:110250794-110252240	198.553	19.9051	3.31832	5e-05	0.00318682	interferon induced protein with tetratricopeptide repeats 5 [Source:HGNC Symbol;Acc:HGNC:13328]	GO:0009615,GO:0051607,GO:0002252,GO:0034340,GO:0051707,GO:0009607,GO:0071357,GO:0045087,GO:0051704,GO:0006952,GO:0034097,GO:0060337,GO:0010033,GO:0006950,GO:0071310,GO:0071345,GO:0006955,GO:0002376,GO:0070887,GO:0042221,GO:0019221,GO:0003723,GO:0005829,GO:0005622,GO:0044424,GO:0005737,GO:0050896,GO:0043229,GO:1901363,GO:0003727,GO:0032587,GO:0043231,GO:0097159,GO:0005515,GO:0008150,GO:0043226,GO:…	response to virus,defense response to virus,immune effector process,response to type I interferon,response to other organism,response to biotic stimulus,cellular response to type I interferon,innate immune response,multi-organism process,defense response,response to cytokine stimulus,type I interferon-mediated signaling pathway,response to organic substance,response to stress,cellular response to…	--	--
ENSSSCT00000015357	ENSSSCG00000014058	CLTB	chr2:83066524-83082536	46.5823	63.3571	-0.443724	0.00405	0.101486	clathrin, light chain B [Source:HGNC Symbol;Acc:HGNC:2091]	--	--	ssc04144,ssc04142,ssc05016,ssc04961,ssc04721,ssc05100	Endocytosis,Lysosome,Huntington's disease,Endocrine and other factor-regulated calcium reabsorption,Synaptic vesicle cycle,Bacterial invasion of epithelial cells
ENSSSCT00000009081	ENSSSCG00000008292	TET3	chr3:72080814-72176994	4.34054	3.40665	0.349522	0.0313	0.35524	tet methylcytosine dioxygenase 3 [Source:HGNC Symbol;Acc:HGNC:28313]	--	--	--	--
ENSSSCT00000026937	ENSSSCG00000022547	-	chr17:40338461-40456280	3.31703	0.337862	3.29538	0.00525	0.121701	--	GO:0010468,GO:0010467,GO:0005515,GO:2000112,GO:0010556,GO:0060255,GO:0009058,GO:1901576,GO:0044249,GO:0034645,GO:0090304,GO:0003676,GO:0009059,GO:0019222,GO:0031326,GO:0016070,GO:0009889,GO:0097159,GO:1901363,GO:0043170,GO:0044260,GO:1901360,GO:0051252,GO:0005488,GO:0006355,GO:2001141,GO:0006351,GO:0071704,GO:0034641,GO:0032774,GO:0044238,GO:0006139,GO:0080090,GO:0046483,GO:0008152,GO:0031323,GO:…	regulation of gene expression,gene expression,protein binding,regulation of cellular macromolecule biosynthetic process,regulation of macromolecule biosynthetic process,regulation of macromolecule metabolic process,biosynthetic process,organic substance biosynthetic process,cellular biosynthetic process,cellular macromolecule biosynthetic process,nucleic acid metabolic process,nucleic acid bindin…	--	--
ENSSSCT00000009556	ENSSSCG00000008736	CPEB2	chr8:9813425-10009746	11.6555	7.15116	0.704761	5e-05	0.00318682	Sus scrofa cytoplasmic polyadenylation element binding protein 2 (CPEB2), mRNA. [Source:RefSeq mRNA;Acc:NM_001185049]	GO:0006950,GO:0005622,GO:0043226,GO:0048523,GO:0043227,GO:0003723,GO:0044424,GO:0048519,GO:0005634,GO:0005737,GO:0017148,GO:0043229,GO:0043231,GO:0005488,GO:0033554,GO:0010033,GO:0071310,GO:0044464,GO:0006417,GO:0005623,GO:0032269,GO:0070887,GO:0051248,GO:0000900,GO:0030371,GO:1990124,GO:2000766,GO:2000765,GO:0003674,GO:0010608,GO:0045182,GO:0090079,GO:0044699,GO:0001666,GO:0036293,GO:0003676,GO:…	response to stress,intracellular,organelle,negative regulation of cellular process,membrane-bounded organelle,RNA binding,intracellular part,negative regulation of biological process,nucleus,cytoplasm,negative regulation of translation,intracellular organelle,intracellular membrane-bounded organelle,binding,cellular response to stress,response to organic substance,cellular response to organic sub…	--	--
ENSSSCT00000001703	ENSSSCG00000001528	RPS10	chr7:35109881-35117436	346.525	420.91	-0.280554	0.04515	0.428673	ribosomal protein S10 [Source:HGNC Symbol;Acc:HGNC:10383]	--	--	ssc03010	Ribosome
ENSSSCT00000001702	ENSSSCG00000001527	C6orf106	chr7:35362834-35410240	78.0828	52.12	0.583169	0.0004	0.0182909	chromosome 6 open reading frame 106 [Source:HGNC Symbol;Acc:HGNC:21215]	--	--	--	--
ENSSSCT00000001707	ENSSSCG00000001532	UHRF1BP1	chr7:35474278-35538654	7.86713	4.73025	0.733923	5e-05	0.00318682	UHRF1 binding protein 1 [Source:HGNC Symbol;Acc:HGNC:21216]	--	--	--	--
ENSSSCT00000024643	ENSSSCG00000024867	ISG20	chr1:212617011-212628410	31.3575	0.829123	5.24108	5e-05	0.00318682	interferon stimulated exonuclease gene 20kDa [Source:HGNC Symbol;Acc:HGNC:6130]	--	--	--	--
ENSSSCT00000036112	ENSSSCG00000008003	HAGHL	chr3:41424153-41428259	4.58475	6.73865	-0.555617	0.0146	0.232485	hydroxyacylglutathione hydrolase-like [Source:HGNC Symbol;Acc:HGNC:14177]	--	--	ssc00620	Pyruvate metabolism
ENSSSCT00000033541	ENSSSCG00000005425	SLC44A1	chr1:276190885-276352739	2.30426	4.28315	-0.894371	0.04085	0.40842	solute carrier family 44 (choline transporter), member 1 [Source:HGNC Symbol;Acc:HGNC:18798]	--	--	--	--
ENSSSCT00000016480	ENSSSCG00000015114	NLRX1	chr9:51422204-51435555	7.39738	9.83374	-0.410725	0.0089	0.171543	NLR family member X1 [Source:HGNC Symbol;Acc:HGNC:29890]	--	--	ssc05164,ssc04622	Influenza A,RIG-I-like receptor signaling pathway
ENSSSCT00000018300	ENSSSCG00000016809	DROSHA	chr16:18544602-18667159	4.97743	3.54273	0.49054	0.0034	0.0907355	drosha, ribonuclease type III [Source:HGNC Symbol;Acc:HGNC:17904]	GO:0051707,GO:0009607,GO:0010033,GO:0006952,GO:0051704,GO:0071310,GO:0070887,GO:0010608,GO:0048518,GO:0044424,GO:0003723,GO:0006950,GO:0010468,GO:0005622,GO:0010467,GO:0043231,GO:0043229,GO:0043227,GO:0005515,GO:0050829,GO:0043226,GO:0060255,GO:0009617,GO:0005634,GO:0046983,GO:0090304,GO:0003676,GO:0019222,GO:0005575,GO:0004540,GO:0016070,GO:0097159,GO:1901363,GO:0043170,GO:0004521,GO:0042742,GO:…	response to other organism,response to biotic stimulus,response to organic substance,defense response,multi-organism process,cellular response to organic substance,cellular response to chemical stimulus,posttranscriptional regulation of gene expression,positive regulation of biological process,intracellular part,RNA binding,response to stress,regulation of gene expression,intracellular,gene expre…	ssc05205,ssc03008	Proteoglycans in cancer,Ribosome biogenesis in eukaryotes
ENSSSCT00000019459	ENSSSCG00000017882	MYBBP1A	chr12:52490054-52504678	9.42321	7.14697	0.398887	0.01085	0.192902	MYB binding protein (P160) 1a [Source:HGNC Symbol;Acc:HGNC:7546]	--	--	--	--
ENSSSCT00000019454	ENSSSCG00000017877	ANKFY1	chr12:52127977-52181196	31.2558	18.8634	0.728534	5e-05	0.00318682	ankyrin repeat and FYVE domain containing 1 [Source:HGNC Symbol;Acc:HGNC:20763]	--	--	--	--
ENSSSCT00000029459	ENSSSCG00000023822	-	GL893029.2:33332-131496	1.0444	2.05657	-0.977562	0.04315	0.420432	--	--	--	--	--
ENSSSCT00000012488	ENSSSCG00000011408	ZMYND10	chr13:36004202-36008027	0.814437	1.3273	-0.70462	0.0378	0.392123	zinc finger, MYND-type containing 10 [Source:HGNC Symbol;Acc:HGNC:19412]	GO:0005737,GO:0044424,GO:0005622,GO:0005515,GO:0048646,GO:0097159,GO:1901363,GO:0005488,GO:0032502,GO:0005575,GO:0048869,GO:0003676,GO:0044767,GO:0048856,GO:0036158,GO:0036159,GO:0044458,GO:0070286,GO:0034622,GO:0009653,GO:0005623,GO:0006996,GO:0032989,GO:0044464,GO:0032990,GO:0016043,GO:0071840,GO:0048858,GO:0003674,GO:0043933,GO:0000902,GO:0070925,GO:0010927,GO:0030031,GO:0044782,GO:0030030,GO:…	cytoplasm,intracellular part,intracellular,protein binding,anatomical structure formation involved in morphogenesis,organic cyclic compound binding,heterocyclic compound binding,binding,developmental process,cellular_component,cellular developmental process,nucleic acid binding,single-organism developmental process,anatomical structure development,outer dynein arm assembly,inner dynein arm assemb…	--	--
ENSSSCT00000011687	ENSSSCG00000010686	BAG3	chr14:141034617-141058597	3.6145	2.28359	0.662492	0.0012	0.0424417	BCL2 associated athanogene 3 [Source:HGNC Symbol;Acc:HGNC:939]	--	--	--	--
ENSSSCT00000004139	ENSSSCG00000003738	MAPRE2	chr6:111324051-111388859	2.78071	1.43467	0.95473	0.0036	0.0936692	microtubule associated protein RP/EB family member 2 [Source:HGNC Symbol;Acc:HGNC:6891]	--	--	--	--
ENSSSCT00000015768	ENSSSCG00000014426	SPINK9	chr2:156314473-156318997	0	1.71039	#NAME?	0.00915	0.173733	serine peptidase inhibitor, Kazal type 9 [Source:HGNC Symbol;Acc:HGNC:32951]	--	--	--	--
ENSSSCT00000009718	ENSSSCG00000008877	ETFDH	chr8:50013289-50060767	37.3967	46.0572	-0.300517	0.0292	0.341922	electron-transferring-flavoprotein dehydrogenase [Source:HGNC Symbol;Acc:HGNC:3483]	GO:0046148,GO:0005737,GO:0006950,GO:0044424,GO:0005622,GO:0043227,GO:0042440,GO:0043226,GO:0043231,GO:0044446,GO:0043229,GO:0044422,GO:0032787,GO:0009058,GO:0071704,GO:0044444,GO:0044237,GO:1901576,GO:0044249,GO:0097159,GO:1901363,GO:0019395,GO:0005488,GO:0051536,GO:0051540,GO:0006631,GO:0034440,GO:0044238,GO:0005575,GO:0044455,GO:0008610,GO:0044255,GO:0019866,GO:0019752,GO:0008152,GO:0030258,GO:…	pigment biosynthetic process,cytoplasm,response to stress,intracellular part,intracellular,membrane-bounded organelle,pigment metabolic process,organelle,intracellular membrane-bounded organelle,intracellular organelle part,intracellular organelle,organelle part,monocarboxylic acid metabolic process,biosynthetic process,organic substance metabolic process,cytoplasmic part,cellular metabolic proce…	--	--
ENSSSCT00000003547	ENSSSCG00000003192	IL4I1	chr6:50635544-50645232	2.72319	1.46308	0.896294	0.00045	0.0200341	interleukin 4 induced 1 [Source:HGNC Symbol;Acc:HGNC:19094]	--	--	ssc00270,ssc00380,ssc00400,ssc00360,ssc00280,ssc00350,ssc00250,ssc01100	Cysteine and methionine metabolism,Tryptophan metabolism,Phenylalanine, tyrosine and tryptophan biosynthesis,Phenylalanine metabolism,Valine, leucine and isoleucine degradation,Tyrosine metabolism,Alanine, aspartate and glutamate metabolism,Metabolic pathways
ENSSSCT00000028446	ENSSSCG00000026414	ATOX1	GL894053.2:177-6167	213.341	280.341	-0.394019	0.00445	0.108492	copper transport protein ATOX1 [Source:RefSeq peptide;Acc:NP_001161113]	--	--	--	--
ENSSSCT00000000156	ENSSSCG00000000148	-	chr5:9275334-9276287	45.1454	8.66322	2.3816	5e-05	0.00318682	--	--	--	--	--
ENSSSCT00000000158	ENSSSCG00000000150	-	chr5:9296017-9301607	1.8155	0.232992	2.96202	0.00025	0.0125444	--	--	--	--	--
ENSSSCT00000023105	ENSSSCG00000029737	CKS1B	chr4:103572165-103575980	60.5126	77.3718	-0.354573	0.01835	0.265523	CDC28 protein kinase regulatory subunit 1B [Source:HGNC Symbol;Acc:HGNC:19083]	--	--	--	--
ENSSSCT00000023102	ENSSSCG00000028771	MEF2A	chr1:154648092-154692276	28.2768	21.3043	0.408469	0.01965	0.276334	myocyte-specific enhancer factor 2A isoform 2 [Source:RefSeq peptide;Acc:NP_001093168]	--	--	ssc04022	cGMP-PKG signaling pathway
ENSSSCT00000027489	ENSSSCG00000008647	CMPK2	chr3:137688567-137704282	12.6287	1.52424	3.05054	0.02635	0.322913	cytidine monophosphate (UMP-CMP) kinase 2, mitochondrial [Source:HGNC Symbol;Acc:HGNC:27015]	GO:0051707,GO:0009607,GO:0051704,GO:0010033,GO:0071310,GO:0070887,GO:0042221,GO:0071396,GO:0005829,GO:0005622,GO:0009132,GO:0044424,GO:0004798,GO:0006227,GO:0006233,GO:0006235,GO:0009138,GO:0009139,GO:0009186,GO:0009189,GO:0009196,GO:0009197,GO:0009202,GO:0009211,GO:0009212,GO:0033862,GO:0046072,GO:0046075,GO:0046077,GO:0005737,GO:0071222,GO:0050896,GO:0033993,GO:0009219,GO:0009221,GO:0009263,GO:…	response to other organism,response to biotic stimulus,multi-organism process,response to organic substance,cellular response to organic substance,cellular response to chemical stimulus,response to chemical stimulus,cellular response to lipid,cytosol,intracellular,nucleoside diphosphate metabolic process,intracellular part,thymidylate kinase activity,dUDP biosynthetic process,dTDP biosynthetic pr…	ssc00240,ssc01100	Pyrimidine metabolism,Metabolic pathways
ENSSSCT00000028682	ENSSSCG00000024974	RPL13	chr6:517792-520205	502.826	664.091	-0.401321	0.0041	0.102403	ribosomal protein L13 [Source:HGNC Symbol;Acc:HGNC:10303]	--	--	ssc03010	Ribosome
ENSSSCT00000023814	ENSSSCG00000023690	PTMA	GL894918.2:6122-7597	1967.56	2516.4	-0.354949	0.00895	0.172157	prothymosin, alpha [Source:HGNC Symbol;Acc:HGNC:9623]	GO:0005515,GO:0005622,GO:0043226,GO:0043227,GO:0044424,GO:0005634,GO:0005737,GO:0043229,GO:0005654,GO:0043231,GO:0044428,GO:0031974,GO:0005488,GO:0070013,GO:0031981,GO:0043233,GO:0044446,GO:0044464,GO:0005623,GO:0044422,GO:0005576,GO:0003674,GO:0044421,GO:0043230,GO:0065010,GO:0070062,GO:0005575,GO:0031988,GO:0031982	protein binding,intracellular,organelle,membrane-bounded organelle,intracellular part,nucleus,cytoplasm,intracellular organelle,nucleoplasm,intracellular membrane-bounded organelle,nuclear part,membrane-enclosed lumen,binding,intracellular organelle lumen,nuclear lumen,organelle lumen,intracellular organelle part,cell part,cell,organelle part,extracellular region,molecular_function,extracellular …	--	--
ENSSSCT00000014232	ENSSSCG00000013021	SF1	chr2:6524029-6536326	10.0752	6.84412	0.557871	0.00165	0.0537245	splicing factor 1 [Source:HGNC Symbol;Acc:HGNC:12950]	--	--	--	--
ENSSSCT00000014236	ENSSSCG00000013023	RASGRP2	chr2:6557413-6573068	0.47209	0.775174	-0.715458	0.0322	0.360761	RAS guanyl releasing protein 2 (calcium and DAG-regulated) [Source:HGNC Symbol;Acc:HGNC:9879]	--	--	ssc04062,ssc04014,ssc04015,ssc04611,ssc04010	Chemokine signaling pathway,Ras signaling pathway,Rap1 signaling pathway,Platelet activation,MAPK signaling pathway
ENSSSCT00000008748	ENSSSCG00000007984	MRPL28	chr3:41094504-41097389	117.549	154.714	-0.396352	0.0031	0.0850105	mitochondrial ribosomal protein L28 [Source:HGNC Symbol;Acc:HGNC:14484]	--	--	ssc03010	Ribosome
ENSSSCT00000010699	ENSSSCG00000009759	SCARB1	chr14:30050780-30093798	3.42593	2.45074	0.483275	0.0212	0.288733	scavenger receptor class B member 1 [Source:HGNC Symbol;Acc:HGNC:1664]	--	--	ssc05160,ssc04145,ssc04976,ssc04913,ssc04975,ssc04977	Hepatitis C,Phagosome,Bile secretion,Ovarian steroidogenesis,Fat digestion and absorption,Vitamin digestion and absorption
ENSSSCT00000004545	ENSSSCG00000004110	TAB2	chr1:18852324-18903792	26.4913	18.1781	0.543314	0.0002	0.0104635	TGF-beta activated kinase 1/MAP3K7 binding protein 2 [Source:HGNC Symbol;Acc:HGNC:17075]	GO:0048518,GO:0048522,GO:0005515,GO:0048513,GO:0060255,GO:0032268,GO:0048584,GO:0019222,GO:0051246,GO:0043170,GO:0070530,GO:0044260,GO:0009893,GO:0072358,GO:0072359,GO:0007507,GO:0048583,GO:0005488,GO:0010604,GO:0031401,GO:0032182,GO:0001934,GO:0071704,GO:0009967,GO:0044238,GO:0007275,GO:0042327,GO:0031399,GO:0048731,GO:0044767,GO:0080090,GO:0023056,GO:0010647,GO:0032270,GO:0031593,GO:0008152,GO:…	positive regulation of biological process,positive regulation of cellular process,protein binding,organ development,regulation of macromolecule metabolic process,regulation of cellular protein metabolic process,positive regulation of response to stimulus,regulation of metabolic process,regulation of protein metabolic process,macromolecule metabolic process,K63-linked polyubiquitin binding,cellula…	ssc04620,ssc04621,ssc05168,ssc05162,ssc04064,ssc05140,ssc04380,ssc04668,ssc05145,ssc04010,ssc05169	Toll-like receptor signaling pathway,NOD-like receptor signaling pathway,Herpes simplex infection,Measles,NF-kappa B signaling pathway,Leishmaniasis,Osteoclast differentiation,TNF signaling pathway,Toxoplasmosis,MAPK signaling pathway,Epstein-Barr virus infection
ENSSSCT00000025762	ENSSSCG00000025782	-	chr12:54951702-54952955	195.725	267.137	-0.448751	0.0014	0.0476023	--	--	--	--	--
ENSSSCT00000007504	ENSSSCG00000006851	-	chr4:122656457-122879785	148.633	121.429	0.291639	0.03155	0.356873	--	--	--	ssc04062,ssc04650,ssc04662,ssc04660,ssc04666,ssc04810,ssc04664,ssc04670,ssc04510,ssc04024	Chemokine signaling pathway,Natural killer cell mediated cytotoxicity,B cell receptor signaling pathway,T cell receptor signaling pathway,Fc gamma R-mediated phagocytosis,Regulation of actin cytoskeleton,Fc epsilon RI signaling pathway,Leukocyte transendothelial migration,Focal adhesion,cAMP signaling pathway
ENSSSCT00000002842	ENSSSCG00000002557	NUDT14	chr7:131249481-131253801	31.319	40.2683	-0.362608	0.02855	0.337719	nudix hydrolase 14 [Source:HGNC Symbol;Acc:HGNC:20141]	GO:0005515,GO:0043226,GO:0043227,GO:0005488,GO:0008768,GO:0047631,GO:0005576,GO:0003674,GO:0044421,GO:0043230,GO:0065010,GO:0070062,GO:0005575,GO:0031988,GO:0008150,GO:0031982,GO:0008152,GO:0043169,GO:0046872,GO:0016462,GO:0016818,GO:0016817,GO:0016787,GO:0003824,GO:0043167	protein binding,organelle,membrane-bounded organelle,binding,UDP-sugar diphosphatase activity,ADP-ribose diphosphatase activity,extracellular region,molecular_function,extracellular region part,extracellular organelle,extracellular membrane-bounded organelle,extracellular vesicular exosome,cellular_component,membrane-bounded vesicle,biological_process,vesicle,metabolic process,cation binding,meta…	--	--
ENSSSCT00000027315	ENSSSCG00000021651	SCN2B	chr9:50526007-50539519	2.28139	3.1017	-0.443141	0.0158	0.243953	sodium channel, voltage gated, type II beta subunit [Source:HGNC Symbol;Acc:HGNC:10589]	--	--	--	--
ENSSSCT00000027316	ENSSSCG00000027573	RPL29	chr13:37315972-37318756	390.605	485.944	-0.315078	0.02575	0.318611	ribosomal protein L29 [Source:HGNC Symbol;Acc:HGNC:10331]	--	--	ssc03010	Ribosome
ENSSSCT00000027313	ENSSSCG00000011876	DTX3L	chr13:147573123-147581225	47.744	8.28421	2.52688	5e-05	0.00318682	deltex 3 like, E3 ubiquitin ligase [Source:HGNC Symbol;Acc:HGNC:30323]	--	--	ssc04330	Notch signaling pathway
ENSSSCT00000025206	ENSSSCG00000029430	-	chr6:154969942-154990226	3.27845	1.86822	0.811351	5e-05	0.00318682	--	--	--	--	--
ENSSSCT00000029692	ENSSSCG00000029301	TCEA1	GL892805.1:109801-114317	2.78429	1.12476	1.30769	0.021	0.28715	transcription elongation factor A (SII), 1 [Source:HGNC Symbol;Acc:HGNC:11612]	GO:0044428,GO:0043231,GO:0005634,GO:0043229,GO:0031981,GO:0005515,GO:0070013,GO:0043233,GO:0005488,GO:0031974,GO:0044424,GO:0043227,GO:0043226,GO:0005622,GO:0044446,GO:0044422,GO:0003674,GO:0044238,GO:0034641,GO:0006139,GO:0044237,GO:0046483,GO:0006725,GO:0010467,GO:0071704,GO:0008152,GO:0043228,GO:0043232,GO:1901360,GO:0006807,GO:0046914,GO:0008270,GO:0044260,GO:0044464,GO:0090304,GO:0005623,GO:…	nuclear part,intracellular membrane-bounded organelle,nucleus,intracellular organelle,nuclear lumen,protein binding,intracellular organelle lumen,organelle lumen,binding,membrane-enclosed lumen,intracellular part,membrane-bounded organelle,organelle,intracellular,intracellular organelle part,organelle part,molecular_function,primary metabolic process,cellular nitrogen compound metabolic process,n…	--	--
ENSSSCT00000024312	ENSSSCG00000027450	-	GL896386.1:12469-13442	0.494756	1.23693	-1.32197	0.0158	0.243953	--	GO:0044424,GO:0005737,GO:0005515,GO:0003674,GO:0043226,GO:0005622,GO:0046983,GO:0043227,GO:0043229,GO:0008152,GO:0043231,GO:0044237,GO:0071704,GO:0005634,GO:0044238,GO:0005488,GO:0044260,GO:0043170,GO:0009058,GO:1901360,GO:1901576,GO:0048519,GO:0046483,GO:0006725,GO:0044249,GO:0034641,GO:0006807,GO:0006139,GO:0005575,GO:0005623,GO:0048523,GO:0044464,GO:0009987,GO:0010467,GO:0009059,GO:0010605,GO:…	intracellular part,cytoplasm,protein binding,molecular_function,organelle,intracellular,protein dimerization activity,membrane-bounded organelle,intracellular organelle,metabolic process,intracellular membrane-bounded organelle,cellular metabolic process,organic substance metabolic process,nucleus,primary metabolic process,binding,cellular macromolecule metabolic process,macromolecule metabolic p…	ssc04550,ssc04350	Signaling pathways regulating pluripotency of stem cells,TGF-beta signaling pathway
ENSSSCT00000031654	ENSSSCG00000026550	ZNF621	chr13:27146908-27154091	1.34557	2.04331	-0.602693	0.03965	0.402064	zinc finger protein 621 [Source:HGNC Symbol;Acc:HGNC:24787]	--	--	--	--
ENSSSCT00000003129	ENSSSCG00000002828	LPCAT2	chr6:27466764-27524179	4.94472	2.91998	0.75993	5e-05	0.00318682	lysophosphatidylcholine acyltransferase 2 [Source:HGNC Symbol;Acc:HGNC:26032]	GO:0006663,GO:0036151,GO:0046469,GO:0047184,GO:0047192,GO:0005811,GO:0043231,GO:0043229,GO:0005783,GO:0016413,GO:0046470,GO:0042439,GO:0019637,GO:0005488,GO:0044444,GO:0044424,GO:0005737,GO:0008374,GO:0003824,GO:0043227,GO:0043226,GO:0005622,GO:0006576,GO:0044106,GO:0044281,GO:0005795,GO:0009308,GO:0046474,GO:0016740,GO:0044431,GO:0008654,GO:0045017,GO:0046165,GO:0016407,GO:0044446,GO:0061024,GO:…	platelet activating factor biosynthetic process,phosphatidylcholine acyl-chain remodeling,platelet activating factor metabolic process,1-acylglycerophosphocholine O-acyltransferase activity,1-alkylglycerophosphocholine O-acetyltransferase activity,lipid particle,intracellular membrane-bounded organelle,intracellular organelle,endoplasmic reticulum,O-acetyltransferase activity,phosphatidylcholine …	ssc00564,ssc00565,ssc01100	Glycerophospholipid metabolism,Ether lipid metabolism,Metabolic pathways
ENSSSCT00000025595	ENSSSCG00000023903	ATP5I	chr8:149900-151754	150.815	185.098	-0.295505	0.0329	0.365004	ATP synthase subunit e, mitochondrial [Source:UniProtKB/Swiss-Prot;Acc:Q9MYT8]	GO:0044424,GO:0005737,GO:0044446,GO:0003674,GO:0044422,GO:0043226,GO:0005622,GO:0043227,GO:0043229,GO:0008152,GO:0043231,GO:0044237,GO:0044455,GO:0071704,GO:1901566,GO:0044238,GO:0003824,GO:0019637,GO:0031966,GO:1901137,GO:0031967,GO:0031975,GO:0032991,GO:0009165,GO:1901293,GO:0005740,GO:0009058,GO:1901360,GO:0009117,GO:0006753,GO:0090407,GO:0055086,GO:1901576,GO:0044444,GO:0046483,GO:0016787,GO:…	intracellular part,cytoplasm,intracellular organelle part,molecular_function,organelle part,organelle,intracellular,membrane-bounded organelle,intracellular organelle,metabolic process,intracellular membrane-bounded organelle,cellular metabolic process,mitochondrial membrane part,organic substance metabolic process,organonitrogen compound biosynthetic process,primary metabolic process,catalytic a…	ssc00190,ssc01100	Oxidative phosphorylation,Metabolic pathways
ENSSSCT00000026760	ENSSSCG00000009224	-	chr8:141000200-141104090	3.15011	2.15726	0.546202	0.006	0.133501	--	--	--	--	--
ENSSSCT00000026767	ENSSSCG00000024115	-	chr12:41461518-41507345	27.1363	3.26051	3.05706	5e-05	0.00318682	--	--	--	--	--
ENSSSCT00000017120	ENSSSCG00000015720	BIN1	chr15:29008390-29057235	0.335403	0.582282	-0.795821	0.036	0.38269	bridging integrator 1 [Source:HGNC Symbol;Acc:HGNC:1052]	--	--	--	--
ENSSSCT00000035361	ENSSSCG00000012241	BCOR	chrX:39823457-39946501	1.42222	0.912016	0.641014	0.0156	0.242127	BCL6 corepressor [Source:HGNC Symbol;Acc:HGNC:20893]	--	--	--	--
ENSSSCT00000011604	ENSSSCG00000010608	SFR1	chr14:124982708-124986320	0.554295	1.67725	-1.59737	0.0137	0.223454	SWI5-dependent homologous recombination repair protein 1 [Source:HGNC Symbol;Acc:HGNC:29574]	--	--	--	--
ENSSSCT00000011600	ENSSSCG00000010604	SH3PXD2A	chr14:124404353-124484519	0.626177	0.340716	0.878001	0.0072	0.150694	SH3 and PX domains 2A [Source:HGNC Symbol;Acc:HGNC:23664]	--	--	--	--
ENSSSCT00000033348	ENSSSCG00000012124	TRAPPC2	chrX:11307152-11319848	14.0384	18.4948	-0.397741	0.046	0.432542	Trafficking protein particle complex subunit 2 [Source:UniProtKB/Swiss-Prot;Acc:F1SRI0]	--	--	--	--
ENSSSCT00000023522	ENSSSCG00000024132	TMEM47	chrX:33945785-33976585	8.63688	5.25626	0.716475	5e-05	0.00318682	transmembrane protein 47 [Source:HGNC Symbol;Acc:HGNC:18515]	--	--	--	--
ENSSSCT00000008725	ENSSSCG00000007962	-	chr3:40865559-40869017	28.6295	38.0813	-0.411582	0.01625	0.248163	--	--	--	--	--
ENSSSCT00000007930	ENSSSCG00000007248	ASXL1	chr17:40908260-40984197	5.11715	3.67032	0.479435	0.0024	0.0708868	additional sex combs like 1, transcriptional regulator [Source:HGNC Symbol;Acc:HGNC:18318]	--	--	--	--
ENSSSCT00000007111	ENSSSCG00000006492	BGLAP	chr4:102507765-102508860	1.28209	2.71597	-1.08297	0.01715	0.256208	bone gamma-carboxyglutamate (gla) protein [Source:HGNC Symbol;Acc:HGNC:1043]	GO:0044424,GO:0005737,GO:0003674,GO:0005622,GO:0010033,GO:0032502,GO:0007275,GO:0048856,GO:0005576,GO:0048731,GO:0005488,GO:0009605,GO:0050793,GO:0048869,GO:0048513,GO:0030154,GO:1901700,GO:0033993,GO:0050896,GO:0005575,GO:0005623,GO:0009888,GO:0051239,GO:0044464,GO:0009987,GO:0007584,GO:0033273,GO:0033280,GO:0008150,GO:0050789,GO:0042221,GO:0043169,GO:0065007,GO:0014070,GO:0030500,GO:0070167,GO:…	intracellular part,cytoplasm,molecular_function,intracellular,response to organic substance,developmental process,multicellular organismal development,anatomical structure development,extracellular region,system development,binding,response to external stimulus,regulation of developmental process,cellular developmental process,organ development,cell differentiation,response to oxygen-containing c…	--	--
ENSSSCT00000007114	ENSSSCG00000006495	SEMA4A	chr4:102610615-102625450	23.1883	8.3992	1.46507	5e-05	0.00318682	sema domain, immunoglobulin domain (Ig), transmembrane domain (TM) and short cytoplasmic domain, (semaphorin) 4A [Source:HGNC Symbol;Acc:HGNC:10729]	GO:0002252,GO:0002376,GO:0030097,GO:0048534,GO:0006955,GO:0002520,GO:0043367,GO:0035710,GO:0046632,GO:0030217,GO:0045063,GO:0046631,GO:0030098,GO:0042093,GO:0042088,GO:0002287,GO:0002292,GO:0002293,GO:0002294,GO:0002286,GO:0071526,GO:0042110,GO:0002521,GO:0002460,GO:0002250,GO:0048585,GO:0046649,GO:0030215,GO:0048843,GO:0048523,GO:0045596,GO:0002285,GO:0045321,GO:0045499,GO:0030517,GO:0048521,GO:…	immune effector process,immune system process,hemopoiesis,hematopoietic or lymphoid organ development,immune response,immune system development,CD4-positive, alpha-beta T cell differentiation,CD4-positive, alpha-beta T cell activation,alpha-beta T cell differentiation,T cell differentiation,T-helper 1 cell differentiation,alpha-beta T cell activation,lymphocyte differentiation,T-helper cell diffe…	ssc04360	Axon guidance
ENSSSCT00000007118	ENSSSCG00000006499	LAMTOR2	chr4:102714739-102719077	46.8674	61.4906	-0.391782	0.00525	0.121701	late endosomal/lysosomal adaptor, MAPK and MTOR activator 2 [Source:HGNC Symbol;Acc:HGNC:29796]	--	--	--	--
ENSSSCT00000024296	ENSSSCG00000028571	FAM207A	chr13:217492705-217520322	21.2632	26.7946	-0.333585	0.02815	0.335007	family with sequence similarity 207 member A [Source:HGNC Symbol;Acc:HGNC:15811]	--	--	--	--
ENSSSCT00000031199	ENSSSCG00000022860	SASH1	GL892553.2:66377-157960	5.76048	4.23904	0.442452	0.0103	0.186537	SAM and SH3 domain containing 1 [Source:HGNC Symbol;Acc:HGNC:19182]	GO:0051707,GO:0009607,GO:0006950,GO:0005515,GO:0010033,GO:0048514,GO:0080134,GO:0071310,GO:0051704,GO:0048646,GO:0006928,GO:0022603,GO:0071704,GO:0090130,GO:0070887,GO:0044237,GO:0032268,GO:0001944,GO:0001525,GO:0043900,GO:0051246,GO:0050793,GO:0005488,GO:0001667,GO:0032502,GO:0001568,GO:0016477,GO:0031399,GO:0048870,GO:0051674,GO:0051094,GO:0048518,GO:0072358,GO:0072359,GO:0044238,GO:0005575,GO:…	response to other organism,response to biotic stimulus,response to stress,protein binding,response to organic substance,blood vessel morphogenesis,regulation of response to stress,cellular response to organic substance,multi-organism process,anatomical structure formation involved in morphogenesis,cellular component movement,regulation of anatomical structure morphogenesis,organic substance metab…	--	--
ENSSSCT00000000460	ENSSSCG00000000426	-	chr5:24206408-24227685	0.948262	1.38112	-0.542476	0.03925	0.399874	--	--	--	--	--
ENSSSCT00000000467	ENSSSCG00000000433	B4GALNT1	JH118928.1:26503-34209	28.8344	37.8895	-0.394006	0.0071	0.149368	beta-1,4-N-acetyl-galactosaminyl transferase 1 [Source:HGNC Symbol;Acc:HGNC:4117]	GO:0005737,GO:0044424,GO:0005622,GO:0043227,GO:0043226,GO:0043231,GO:0044446,GO:0043229,GO:0044422,GO:0009058,GO:0071704,GO:0044444,GO:0044237,GO:1901576,GO:0044249,GO:1901566,GO:0044238,GO:0005575,GO:0008610,GO:0044255,GO:0008152,GO:0030258,GO:0019915,GO:0031301,GO:0006629,GO:0031300,GO:0006807,GO:0016757,GO:1901137,GO:0016758,GO:0030259,GO:0005623,GO:0044710,GO:0033036,GO:0010876,GO:0003824,GO:…	cytoplasm,intracellular part,intracellular,membrane-bounded organelle,organelle,intracellular membrane-bounded organelle,intracellular organelle part,intracellular organelle,organelle part,biosynthetic process,organic substance metabolic process,cytoplasmic part,cellular metabolic process,organic substance biosynthetic process,cellular biosynthetic process,organonitrogen compound biosynthetic pro…	ssc00604,ssc01100	Glycosphingolipid biosynthesis - ganglio series,Metabolic pathways
ENSSSCT00000032187	ENSSSCG00000027219	AKAP7	GL894048.1:9382-33099	25.1129	8.03431	1.64418	5e-05	0.00318682	A-kinase anchoring protein 7 [Source:HGNC Symbol;Acc:HGNC:377]	GO:0034237,GO:0005829,GO:0043231,GO:0005634,GO:0043229,GO:0051018,GO:0005515,GO:0005488,GO:0044444,GO:0044424,GO:0005737,GO:0043227,GO:0043226,GO:0005622,GO:0019901,GO:0019900,GO:0003674,GO:0019899,GO:0044464,GO:0005623,GO:0005575	protein kinase A regulatory subunit binding,cytosol,intracellular membrane-bounded organelle,nucleus,intracellular organelle,protein kinase A binding,protein binding,binding,cytoplasmic part,intracellular part,cytoplasm,membrane-bounded organelle,organelle,intracellular,protein kinase binding,kinase binding,molecular_function,enzyme binding,cell part,cell,cellular_component	--	--
ENSSSCT00000025651	ENSSSCG00000020769	-	chr18:56857685-56868920	250.574	197.405	0.344077	0.01265	0.21246	--	--	--	ssc03050	Proteasome
ENSSSCT00000025654	ENSSSCG00000026539	-	JH118618.1:25166-26166	9.25658	13.0101	-0.491077	0.03775	0.391838	--	--	--	ssc04141	Protein processing in endoplasmic reticulum
ENSSSCT00000016872	ENSSSCG00000015488	TNFSF4	chr9:127044586-127046516	1.40313	3.09981	-1.14353	0.0296	0.344576	tumor necrosis factor superfamily member 4 [Source:HGNC Symbol;Acc:HGNC:11934]	--	--	ssc04060	Cytokine-cytokine receptor interaction
ENSSSCT00000027408	ENSSSCG00000030262	GDPD1	chr12:36929185-37026257	17.5296	24.6332	-0.49081	0.00135	0.0463331	glycerophosphodiester phosphodiesterase domain containing 1 [Source:HGNC Symbol;Acc:HGNC:20883]	GO:0005575,GO:0071704,GO:0044238,GO:0008152,GO:0006629,GO:0008889,GO:0016788,GO:0003824,GO:0016020,GO:0042578,GO:0008081,GO:0016787,GO:0044710,GO:0003674,GO:0008150,GO:0044425,GO:0016021,GO:0031224	cellular_component,organic substance metabolic process,primary metabolic process,metabolic process,lipid metabolic process,glycerophosphodiester phosphodiesterase activity,hydrolase activity, acting on ester bonds,catalytic activity,membrane,phosphoric ester hydrolase activity,phosphoric diester hydrolase activity,hydrolase activity,single-organism metabolic process,molecular_function,biological_…	--	--
ENSSSCT00000028605	ENSSSCG00000025810	KCNAB1	chr13:104350776-104480018	2.99693	1.85106	0.695137	0.02325	0.30122	potassium channel, voltage gated subfamily A regulatory beta subunit 1 [Source:HGNC Symbol;Acc:HGNC:6228]	--	--	--	--
ENSSSCT00000016023	ENSSSCG00000014672	TRIM6	chr9:4689734-4720219	7.27137	3.11754	1.22182	5e-05	0.00318682	-	--	--	--	--
ENSSSCT00000016021	ENSSSCG00000014670	TRIM5	chr9:4724245-4737190	116.733	37.4875	1.63873	5e-05	0.00318682	-	--	--	--	--
ENSSSCT00000001531	ENSSSCG00000001402	NFKBIL1	chr7:27566955-27578071	11.6308	17.044	-0.551307	0.00125	0.0437374	nuclear factor of kappa light polypeptide gene enhancer in B-cells inhibitor-like 1 [Source:HGNC Symbol;Acc:HGNC:7800]	--	--	--	--
ENSSSCT00000018515	ENSSSCG00000017003	KCNIP1	chr16:57544456-57558818	3.9211	2.48545	0.657753	0.00545	0.124826	Kv channel-interacting protein 1 [Source:RefSeq peptide;Acc:NP_001026947]	--	--	--	--
ENSSSCT00000018518	ENSSSCG00000017006	LCP2	chr16:58039299-58082197	36.45	26.6728	0.450549	0.00125	0.0437374	lymphocyte cytosolic protein 2 [Source:HGNC Symbol;Acc:HGNC:6529]	--	--	ssc04380,ssc04660,ssc04015,ssc04611,ssc04650,ssc04664	Osteoclast differentiation,T cell receptor signaling pathway,Rap1 signaling pathway,Platelet activation,Natural killer cell mediated cytotoxicity,Fc epsilon RI signaling pathway
ENSSSCT00000005743	ENSSSCG00000026305	PDCD1LG2	GL896018.1:1858-35531	10.626	5.47593	0.956423	5e-05	0.00318682	programmed cell death 1 ligand 2 precursor [Source:RefSeq peptide;Acc:NP_001020391]	--	--	ssc04514	Cell adhesion molecules (CAMs)
ENSSSCT00000017868	ENSSSCG00000016411	NOM1	chr18:1738317-1748782	5.6409	7.57105	-0.424567	0.01835	0.265523	nucleolar protein with MIF4G domain 1 [Source:HGNC Symbol;Acc:HGNC:13244]	GO:0005515,GO:0005622,GO:0043226,GO:0043227,GO:0003723,GO:0044424,GO:0005634,GO:0043229,GO:0043231,GO:0044428,GO:0031974,GO:0005488,GO:0070013,GO:0031981,GO:0043233,GO:0043228,GO:0043232,GO:0044446,GO:0044464,GO:0005730,GO:0005623,GO:0044422,GO:0048731,GO:0007275,GO:0042274,GO:0022613,GO:0048856,GO:0003674,GO:0007399,GO:0044699,GO:0003676,GO:0005575,GO:0071840,GO:0032502,GO:0022008,GO:0008150,GO:…	protein binding,intracellular,organelle,membrane-bounded organelle,RNA binding,intracellular part,nucleus,intracellular organelle,intracellular membrane-bounded organelle,nuclear part,membrane-enclosed lumen,binding,intracellular organelle lumen,nuclear lumen,organelle lumen,non-membrane-bounded organelle,intracellular non-membrane-bounded organelle,intracellular organelle part,cell part,nucleolu…	--	--
ENSSSCT00000016642	ENSSSCG00000015273	-	chr9:70628149-70765399	14.9188	11.5828	0.365141	0.0167	0.252272	--	--	--	--	--
ENSSSCT00000003379	ENSSSCG00000003042	-	chr6:45981952-46078610	286.583	376.808	-0.394876	0.0102	0.185383	--	--	--	ssc03010	Ribosome
ENSSSCT00000011854	ENSSSCG00000010835	AIDA	chr10:13586601-13621298	50.1906	38.9037	0.36751	0.01005	0.183696	axin interactor, dorsalization associated [Source:HGNC Symbol;Acc:HGNC:25761]	GO:0006950,GO:0044424,GO:0005737,GO:0005515,GO:0003674,GO:0005622,GO:0080134,GO:0008152,GO:0044237,GO:0071704,GO:0043506,GO:0044238,GO:0005488,GO:0033554,GO:0032872,GO:0046328,GO:0070302,GO:0043508,GO:0044260,GO:0044267,GO:0019538,GO:0080135,GO:0043170,GO:0048583,GO:0043407,GO:0032268,GO:0032269,GO:0032873,GO:0046329,GO:0070303,GO:0051248,GO:0050896,GO:0043409,GO:0007254,GO:0042325,GO:0001932,GO:…	response to stress,intracellular part,cytoplasm,protein binding,molecular_function,intracellular,regulation of response to stress,metabolic process,cellular metabolic process,organic substance metabolic process,regulation of JUN kinase activity,primary metabolic process,binding,cellular response to stress,regulation of stress-activated MAPK cascade,regulation of JNK cascade,regulation of stress-a…	--	--
ENSSSCT00000001096	ENSSSCG00000001004	SLC22A23	chr7:2052759-2194261	1.46903	0.998964	0.556358	0.04745	0.439772	solute carrier family 22 member 23 [Source:HGNC Symbol;Acc:HGNC:21106]	--	--	--	--
ENSSSCT00000000942	ENSSSCG00000000863	SYCP3	chr5:86445887-86455618	1.81944	2.60489	-0.517731	0.0149	0.23537	synaptonemal complex protein 3 [Source:HGNC Symbol;Acc:HGNC:18130]	--	--	--	--
ENSSSCT00000006479	ENSSSCG00000005900	GPT	chr4:388743-391693	0.7508	1.42169	-0.921107	0.0033	0.088885	glutamic-pyruvate transaminase (alanine aminotransferase) [Source:HGNC Symbol;Acc:HGNC:4552]	--	--	ssc01210,ssc00250,ssc01200,ssc01230,ssc01100	2-Oxocarboxylic acid metabolism,Alanine, aspartate and glutamate metabolism,Carbon metabolism,Biosynthesis of amino acids,Metabolic pathways
ENSSSCT00000002540	ENSSSCG00000002282	MAX	chr7:95520599-95544268	85.6582	62.7824	0.44823	0.0084	0.165632	MYC associated factor X [Source:HGNC Symbol;Acc:HGNC:6913]	--	--	ssc05202,ssc05200,ssc05222,ssc04010	Transcriptional misregulation in cancer,Pathways in cancer,Small cell lung cancer,MAPK signaling pathway
ENSSSCT00000002548	ENSSSCG00000002287	MPP5	chr7:97300591-97362579	12.9928	9.6856	0.423796	0.01005	0.183696	membrane protein, palmitoylated 5 [Source:HGNC Symbol;Acc:HGNC:18669]	--	--	ssc04390,ssc04530	Hippo signaling pathway,Tight junction
ENSSSCT00000030573	ENSSSCG00000021383	MB21D1	chr1:103535848-103557331	12.0719	3.78745	1.67235	5e-05	0.00318682	Mab-21 domain containing 1 [Source:HGNC Symbol;Acc:HGNC:21367]	--	--	ssc04623	Cytosolic DNA-sensing pathway
ENSSSCT00000003637	ENSSSCG00000003275	-	chr6:53541981-53550066	1.57812	0.388199	2.02334	0.00995	0.182499	--	--	--	--	--
ENSSSCT00000007702	ENSSSCG00000007033	AP3M2	chr17:13140128-13164028	0.347805	0.575178	-0.725732	0.024	0.306396	adaptor related protein complex 3, mu 2 subunit [Source:HGNC Symbol;Acc:HGNC:570]	--	--	ssc04142	Lysosome
ENSSSCT00000025281	ENSSSCG00000023241	-	chr14:65734684-65742345	9.8638	7.21978	0.450187	0.0201	0.279968	--	--	--	--	--
ENSSSCT00000012352	ENSSSCG00000011282	SEC22C	chr13:28754403-28773963	8.43282	11.0637	-0.39174	0.02615	0.321526	SEC22 homolog C, vesicle trafficking protein [Source:HGNC Symbol;Acc:HGNC:16828]	--	--	--	--
ENSSSCT00000023030	ENSSSCG00000026113	-	chr13:155134435-155152622	2.24249	1.60463	0.482865	0.00745	0.154071	--	--	--	--	--
ENSSSCT00000018066	ENSSSCG00000016593	ARF5	chr18:21699124-21702395	24.0797	33.2831	-0.466972	0.00325	0.0879544	ADP ribosylation factor 5 [Source:HGNC Symbol;Acc:HGNC:658]	GO:0044424,GO:0005622,GO:0043227,GO:0051649,GO:0005515,GO:0043226,GO:0005737,GO:0051641,GO:0005575,GO:0097159,GO:1901363,GO:0005488,GO:0000166,GO:1901265,GO:0046907,GO:0036094,GO:0065007,GO:0005623,GO:0050789,GO:0051179,GO:0032403,GO:0005525,GO:0050794,GO:0044464,GO:0019001,GO:0032561,GO:0003824,GO:0035556,GO:0032555,GO:0017076,GO:0032553,GO:0050896,GO:0015031,GO:0035639,GO:0001883,GO:0032550,GO:…	intracellular part,intracellular,membrane-bounded organelle,establishment of localization in cell,protein binding,organelle,cytoplasm,cellular localization,cellular_component,organic cyclic compound binding,heterocyclic compound binding,binding,nucleotide binding,nucleoside phosphate binding,intracellular transport,small molecule binding,biological regulation,cell,regulation of biological process…	ssc04144	Endocytosis
ENSSSCT00000031763	ENSSSCG00000024359	FRA10AC1	chr14:114858497-114901247	6.82198	9.40674	-0.463504	0.01455	0.231949	fragile site, folic acid type, rare, fra(10)(q23.3) or fra(10)(q24.2) candidate 1 [Source:HGNC Symbol;Acc:HGNC:1162]	--	--	--	--
ENSSSCT00000031764	ENSSSCG00000027139	FYTTD1	chr13:143957755-143996599	54.7361	44.7976	0.28907	0.0335	0.368671	forty-two-three domain containing 1 [Source:HGNC Symbol;Acc:HGNC:25407]	--	--	--	--
ENSSSCT00000024737	ENSSSCG00000024812	FOSL2	chr3:117543879-117555469	51.736	71.2535	-0.461792	0.0013	0.0450029	FOS-like antigen 2 [Source:HGNC Symbol;Acc:HGNC:3798]	--	--	--	--
ENSSSCT00000022777	ENSSSCG00000029573	NASP	GL895352.1:15710-29819	7.54813	9.70906	-0.363212	0.02215	0.294881	nuclear autoantigenic sperm protein (histone-binding) [Source:HGNC Symbol;Acc:HGNC:7644]	--	--	--	--
ENSSSCT00000015027	ENSSSCG00000013753	IER2	chr2:66211128-66211794	46.7336	60.5441	-0.373527	0.01885	0.269794	immediate early response 2 [Source:HGNC Symbol;Acc:HGNC:28871]	--	--	--	--
ENSSSCT00000015026	ENSSSCG00000013752	STX10	chr2:66214635-66217782	13.3912	17.0752	-0.350622	0.0325	0.362543	syntaxin 10 [Source:HGNC Symbol;Acc:HGNC:11428]	--	--	ssc04130	SNARE interactions in vesicular transport
ENSSSCT00000012794	ENSSSCG00000011686	-	chr13:92043892-92260574	28.9165	18.2365	0.665061	0.00025	0.0125444	--	--	--	--	--
ENSSSCT00000010798	ENSSSCG00000009852	VSIG10	chr14:36720014-36768249	1.11431	1.60184	-0.523583	0.0166	0.251453	V-set and immunoglobulin domain containing 10 [Source:HGNC Symbol;Acc:HGNC:26078]	--	--	--	--
ENSSSCT00000019071	ENSSSCG00000017517	TBX21	chr12:23867190-23879666	0.661984	0.380965	0.797139	0.0327	0.363805	T-box 21 [Source:HGNC Symbol;Acc:HGNC:11599]	--	--	ssc05321	Inflammatory bowel disease (IBD)
ENSSSCT00000019075	ENSSSCG00000017521	SCRN2	chr12:23968529-23972991	5.02497	7.21926	-0.522736	0.0075	0.154701	secernin 2 [Source:HGNC Symbol;Acc:HGNC:30381]	--	--	--	--
ENSSSCT00000029072	ENSSSCG00000030242	RSRP1	GL894621.1:28008-30628	23.1152	30.17	-0.384275	0.04145	0.411476	arginine/serine-rich protein 1 [Source:HGNC Symbol;Acc:HGNC:25234]	--	--	--	--
ENSSSCT00000028854	ENSSSCG00000022162	RAB11FIP5	chr3:72860316-72902177	2.14653	2.8881	-0.428118	0.0131	0.217224	RAB11 family interacting protein 5 (class I) [Source:HGNC Symbol;Acc:HGNC:24845]	--	--	ssc04144	Endocytosis
ENSSSCT00000011111	ENSSSCG00000010148	-	chr14:59062488-59079456	7.41309	5.28652	0.487757	0.0193	0.273318	--	--	--	ssc04141	Protein processing in endoplasmic reticulum
ENSSSCT00000022571	ENSSSCG00000030458	-	chr6:69907198-69914782	1.78597	2.83198	-0.665102	0.0188	0.269385	--	--	--	--	--
ENSSSCT00000005913	ENSSSCG00000005373	NANS	chr1:268051415-268082286	13.9467	18.657	-0.419797	0.0129	0.215141	N-acetylneuraminate synthase [Source:HGNC Symbol;Acc:HGNC:19237]	--	--	ssc00520,ssc01100	Amino sugar and nucleotide sugar metabolism,Metabolic pathways
ENSSSCT00000005914	ENSSSCG00000005374	TRIM14	chr1:268088217-268114635	15.4535	6.34501	1.28424	5e-05	0.00318682	tripartite motif containing 14 [Source:HGNC Symbol;Acc:HGNC:16283]	--	--	--	--
ENSSSCT00000005919	ENSSSCG00000005379	GALNT12	chr1:268840562-268881630	1.33646	1.98652	-0.571828	0.02945	0.343613	polypeptide N-acetylgalactosaminyltransferase 12 [Source:HGNC Symbol;Acc:HGNC:19877]	--	--	ssc00512,ssc01100	Mucin type O-Glycan biosynthesis,Metabolic pathways
ENSSSCT00000027056	ENSSSCG00000027571	-	GL893394.1:5873-56173	1.89476	3.16842	-0.741751	0.00675	0.144443	--	--	--	--	--
ENSSSCT00000025989	ENSSSCG00000026969	KRAS	chr5:52229479-52276321	17.9386	14.4808	0.308923	0.031	0.353417	Kirsten rat sarcoma viral oncogene homolog [Source:HGNC Symbol;Acc:HGNC:6407]	--	--	ssc04917,ssc05160,ssc05161,ssc05211,ssc05219,ssc05210,ssc04320,ssc04062,ssc04664,ssc05213,ssc05203,ssc05200,ssc04916,ssc04722,ssc04370,ssc05214,ssc05212,ssc04012,ssc04660,ssc04912,ssc05216,ssc04550,ssc04725,ssc04662,ssc05223,ssc05221,ssc04730,ssc04650,ssc05215,ssc04910,ssc04068,ssc04921,ssc04960,ssc04540,ssc04720,ssc05205,ssc05034,ssc05218,ssc05220,ssc04915,ssc04726,ssc04010,ssc04014,ssc04015,ssc…	Prolactin signaling pathway,Hepatitis C,Hepatitis B,Renal cell carcinoma,Bladder cancer,Colorectal cancer,Dorso-ventral axis formation,Chemokine signaling pathway,Fc epsilon RI signaling pathway,Endometrial cancer,Viral carcinogenesis,Pathways in cancer,Melanogenesis,Neurotrophin signaling pathway,VEGF signaling pathway,Glioma,Pancreatic cancer,ErbB signaling pathway,T cell receptor signaling pat…
ENSSSCT00000008395	ENSSSCG00000007655	-	chr3:7503103-7504271	6.59376	4.26762	0.627671	0.0165	0.250514	--	--	--	ssc05168	Herpes simplex infection
ENSSSCT00000026046	ENSSSCG00000027293	TNPO1	chr16:53235305-53288151	65.6982	53.0349	0.308911	0.0229	0.300524	transportin 1 [Source:HGNC Symbol;Acc:HGNC:6401]	--	--	--	--
ENSSSCT00000026044	ENSSSCG00000022357	-	chr3:90773816-90776397	1550.4	2057.24	-0.408072	0.0049	0.115959	--	--	--	ssc03010	Ribosome
ENSSSCT00000029794	ENSSSCG00000030648	-	chr3:126064141-126073957	46.7274	29.7375	0.651984	0.0009	0.0341662	--	--	--	ssc04142	Lysosome
ENSSSCT00000008537	ENSSSCG00000007789	-	chr3:18110833-18159227	4.67564	3.24968	0.524868	0.00055	0.0234187	--	--	--	--	--
ENSSSCT00000004183	ENSSSCG00000003780	CRYZ	chr6:128304888-128327585	3.1755	2.16138	0.555029	0.0079	0.159812	crystallin zeta [Source:HGNC Symbol;Acc:HGNC:2419]	--	--	--	--
ENSSSCT00000013477	ENSSSCG00000012324	IQSEC2	chrX:51511351-51566563	2.26829	1.67074	0.44112	0.01875	0.269	IQ motif and Sec7 domain 2 [Source:HGNC Symbol;Acc:HGNC:29059]	--	--	ssc04144	Endocytosis
ENSSSCT00000004450	ENSSSCG00000004024	-	chr1:3289750-3306795	145.32	115.95	0.325729	0.0192	0.272551	--	--	--	--	--
ENSSSCT00000003864	ENSSSCG00000003478	-	chr6:69887310-69905303	2.4861	3.83228	-0.624321	0.002	0.0620239	--	--	--	--	--
ENSSSCT00000005325	ENSSSCG00000004823	-	chr1:155637549-155853766	7.0443	5.40448	0.382299	0.0083	0.164328	--	--	--	--	--
ENSSSCT00000005327	ENSSSCG00000004825	CHSY1	chr1:155959953-156033821	34.3605	24.8988	0.464675	0.00075	0.0296994	chondroitin sulfate synthase 1 precursor [Source:RefSeq peptide;Acc:NP_001231371]	--	--	ssc00532,ssc01100	Glycosaminoglycan biosynthesis - chondroitin sulfate / dermatan sulfate,Metabolic pathways
ENSSSCT00000009832	ENSSSCG00000008977	CXCL10	chr8:75809804-75991009	370.966	2.96144	6.96884	5e-05	0.00318682	C-X-C motif chemokine 10 precursor [Source:RefSeq peptide;Acc:NP_001008691]	--	--	ssc05164,ssc04623,ssc04622,ssc04620,ssc04060,ssc04668,ssc04062	Influenza A,Cytosolic DNA-sensing pathway,RIG-I-like receptor signaling pathway,Toll-like receptor signaling pathway,Cytokine-cytokine receptor interaction,TNF signaling pathway,Chemokine signaling pathway
ENSSSCT00000009835	ENSSSCG00000008980	SCARB2	chr8:76034113-76105880	230.231	164.858	0.481858	0.0017	0.0549108	scavenger receptor class B member 2 [Source:HGNC Symbol;Acc:HGNC:1665]	--	--	ssc04142	Lysosome
ENSSSCT00000030398	ENSSSCG00000021669	-	GL896012.1:578-11257	42.6648	33.6348	0.343093	0.03865	0.396611	--	--	--	--	--
ENSSSCT00000031937	ENSSSCG00000030439	-	JH118743.1:1449-30183	38.6684	31.4074	0.30005	0.0472	0.438563	--	--	--	--	--
ENSSSCT00000009167	ENSSSCG00000008372	-	chr3:82973000-83140450	1.74504	1.23707	0.496331	0.02745	0.330276	--	--	--	--	--
ENSSSCT00000026530	ENSSSCG00000021825	RPS21	chr17:69172954-69173861	1115.93	1420.77	-0.348426	0.0193	0.273318	40S ribosomal protein S21 [Source:UniProtKB/Swiss-Prot;Acc:P63221]	--	--	ssc03010	Ribosome
ENSSSCT00000026535	ENSSSCG00000022773	-	chr13:26306728-26310461	15.7538	8.39257	0.908517	5e-05	0.00318682	caspase-15 [Source:RefSeq peptide;Acc:NP_001032224]	GO:0044424,GO:0006950,GO:0097190,GO:0005622,GO:0012501,GO:0008219,GO:0016265,GO:0043280,GO:0006915,GO:0005737,GO:2001056,GO:0097191,GO:0010950,GO:0006919,GO:0008630,GO:0010952,GO:0097202,GO:0019222,GO:0005575,GO:0043067,GO:0097193,GO:0042981,GO:0010941,GO:0043281,GO:2000116,GO:0052548,GO:0008152,GO:0065007,GO:0052547,GO:0005623,GO:0050789,GO:0097153,GO:0097199,GO:0044093,GO:0006974,GO:0050794,GO:…	intracellular part,response to stress,apoptotic signaling pathway,intracellular,programmed cell death,cell death,death,positive regulation of cysteine-type endopeptidase activity involved in apoptotic process,apoptotic process,cytoplasm,positive regulation of cysteine-type endopeptidase activity,extrinsic apoptotic signaling pathway,positive regulation of endopeptidase activity,activation of cyst…	--	--
ENSSSCT00000035130	ENSSSCG00000011226	TGFBR2	chr13:18707604-18710521	64.4413	51.2417	0.330668	0.03105	0.353725	transforming growth factor beta receptor II [Source:HGNC Symbol;Acc:HGNC:11773]	GO:0002376,GO:0010033,GO:0071310,GO:0070887,GO:0016477,GO:0048870,GO:0051674,GO:0030097,GO:0048518,GO:0006928,GO:0043235,GO:0002520,GO:0010468,GO:0048534,GO:0048522,GO:0060443,GO:0010467,GO:0012501,GO:0040011,GO:0008219,GO:0016265,GO:0005515,GO:0048513,GO:0006915,GO:0009888,GO:0033993,GO:0002682,GO:0046632,GO:0009897,GO:0030217,GO:0090130,GO:0032879,GO:0001667,GO:0030099,GO:0051216,GO:0060255,GO:…	immune system process,response to organic substance,cellular response to organic substance,cellular response to chemical stimulus,cell migration,cell motility,localization of cell,hemopoiesis,positive regulation of biological process,cellular component movement,receptor complex,immune system development,regulation of gene expression,hematopoietic or lymphoid organ development,positive regulation …	ssc04380,ssc05142,ssc04144,ssc05210,ssc05200,ssc05220,ssc04060,ssc04390,ssc05212,ssc05202,ssc05166,ssc04520,ssc04350,ssc04010,ssc04068	Osteoclast differentiation,Chagas disease (American trypanosomiasis),Endocytosis,Colorectal cancer,Pathways in cancer,Chronic myeloid leukemia,Cytokine-cytokine receptor interaction,Hippo signaling pathway,Pancreatic cancer,Transcriptional misregulation in cancer,HTLV-I infection,Adherens junction,TGF-beta signaling pathway,MAPK signaling pathway,FoxO signaling pathway
ENSSSCT00000016759	ENSSSCG00000015384	TOMM7	chr9:100959711-100968624	112.197	159.864	-0.51081	0.00135	0.0463331	Mitochondrial import receptor subunit TOM7 homolog [Source:UniProtKB/Swiss-Prot;Acc:A1XQS2]	GO:0005737,GO:0044424,GO:0005622,GO:0043227,GO:0005515,GO:0043226,GO:0043231,GO:0044446,GO:0043229,GO:0010608,GO:0006605,GO:0044422,GO:0022884,GO:0071704,GO:0010467,GO:0044444,GO:0046907,GO:0051641,GO:0051649,GO:0006886,GO:0005488,GO:0031306,GO:0031307,GO:0005575,GO:0019222,GO:0033365,GO:0044455,GO:0065008,GO:0008152,GO:0032592,GO:0043170,GO:0032991,GO:0008320,GO:0031647,GO:0060255,GO:0016482,GO:…	cytoplasm,intracellular part,intracellular,membrane-bounded organelle,protein binding,organelle,intracellular membrane-bounded organelle,intracellular organelle part,intracellular organelle,posttranscriptional regulation of gene expression,protein targeting,organelle part,macromolecule transmembrane transporter activity,organic substance metabolic process,gene expression,cytoplasmic part,intracel…	--	--
ENSSSCT00000016755	ENSSSCG00000015380	CDCA7L	chr9:99840593-100233792	1.65213	2.31741	-0.488191	0.03125	0.354901	cell division cycle associated 7-like [Source:HGNC Symbol;Acc:HGNC:30777]	GO:0005737,GO:0044424,GO:0005622,GO:0043227,GO:0005515,GO:0043226,GO:0043231,GO:0044446,GO:0043229,GO:0044422,GO:0070013,GO:0043233,GO:0031974,GO:0005488,GO:0044428,GO:0005730,GO:0031981,GO:0048518,GO:0005575,GO:0005634,GO:0048522,GO:0005623,GO:0008284,GO:0043228,GO:0043232,GO:0044464,GO:0008283,GO:0003674,GO:0042127,GO:0050789,GO:0009987,GO:0065007,GO:0050794,GO:0008150,GO:0044699	cytoplasm,intracellular part,intracellular,membrane-bounded organelle,protein binding,organelle,intracellular membrane-bounded organelle,intracellular organelle part,intracellular organelle,organelle part,intracellular organelle lumen,organelle lumen,membrane-enclosed lumen,binding,nuclear part,nucleolus,nuclear lumen,positive regulation of biological process,cellular_component,nucleus,positive r…	--	--
ENSSSCT00000035155	ENSSSCG00000017416	DHX58	chr12:20937867-20946850	27.2317	1.57127	4.11528	0.003	0.083117	DEXH (Asp-Glu-X-His) box polypeptide 58 [Source:HGNC Symbol;Acc:HGNC:29517]	--	--	ssc04622	RIG-I-like receptor signaling pathway
ENSSSCT00000010347	ENSSSCG00000009440	ELF1	chr11:26327365-26385565	71.8878	48.0392	0.581536	5e-05	0.00318682	E74-like factor 1 (ets domain transcription factor) [Source:HGNC Symbol;Acc:HGNC:3316]	--	--	--	--
ENSSSCT00000013060	ENSSSCG00000011936	ZBED2	chr13:158860322-158915497	2.40663	4.56346	-0.923114	0.00075	0.0296994	zinc finger, BED-type containing 2 [Source:HGNC Symbol;Acc:HGNC:20710]	GO:0003676,GO:0097159,GO:1901363,GO:0005488,GO:0003677,GO:0003674	nucleic acid binding,organic cyclic compound binding,heterocyclic compound binding,binding,DNA binding,molecular_function	--	--
ENSSSCT00000013068	ENSSSCG00000011942	CD47	chr13:160478686-160518107	276.101	219.755	0.329303	0.0161	0.246744	leukocyte surface antigen CD47 precursor [Source:RefSeq peptide;Acc:NP_999147]	GO:0002252,GO:0051707,GO:0009607,GO:0051704,GO:0002376,GO:0006950,GO:0006952,GO:0005515,GO:0043226,GO:0043227,GO:0002682,GO:0008284,GO:0042110,GO:0046649,GO:0005488,GO:0031347,GO:0051130,GO:0045321,GO:0008228,GO:0070053,GO:0044464,GO:0008283,GO:0001775,GO:0045807,GO:0005623,GO:0048522,GO:0042127,GO:0032879,GO:0051049,GO:0005576,GO:0006909,GO:0060627,GO:0080134,GO:0048518,GO:0050766,GO:0051128,GO:…	immune effector process,response to other organism,response to biotic stimulus,multi-organism process,immune system process,response to stress,defense response,protein binding,organelle,membrane-bounded organelle,regulation of immune system process,positive regulation of cell proliferation,T cell activation,lymphocyte activation,binding,regulation of defense response,positive regulation of cellul…	ssc04512	ECM-receptor interaction
ENSSSCT00000013933	ENSSSCG00000012744	CD99L2	chrX:140071620-140150976	0.433051	0.781443	-0.851604	0.01825	0.26469	CD99 molecule like 2 [Source:HGNC Symbol;Acc:HGNC:18237]	GO:0005515,GO:0005488,GO:0005925,GO:0005924,GO:0030055,GO:0005912,GO:0070161,GO:0003674,GO:0030054,GO:0044425,GO:0016020,GO:0005575,GO:0016021,GO:0031224	protein binding,binding,focal adhesion,cell-substrate adherens junction,cell-substrate junction,adherens junction,anchoring junction,molecular_function,cell junction,membrane part,membrane,cellular_component,integral to membrane,intrinsic to membrane	--	--
ENSSSCT00000015194	ENSSSCG00000013908	C19orf60	chr2:59065440-59068526	59.0424	74.6988	-0.339333	0.01845	0.266378	chromosome 19 open reading frame 60 [Source:HGNC Symbol;Acc:HGNC:26098]	--	--	--	--
ENSSSCT00000011572	ENSSSCG00000010579	GBF1	chr14:123099429-123233902	9.58157	6.56389	0.545711	0.0002	0.0104635	golgi brefeldin A resistant guanine nucleotide exchange factor 1 [Source:HGNC Symbol;Acc:HGNC:4181]	GO:0002252,GO:0002376,GO:0070887,GO:0006955,GO:0016477,GO:0048870,GO:0051674,GO:0044424,GO:0050900,GO:0006928,GO:0030595,GO:0005622,GO:0043231,GO:0043229,GO:0043227,GO:0030593,GO:0040011,GO:0060326,GO:0051649,GO:0005515,GO:0043226,GO:0005737,GO:0007049,GO:0032879,GO:0051641,GO:0071621,GO:0006935,GO:0042330,GO:0044444,GO:0019222,GO:0005575,GO:0051726,GO:0002263,GO:0048199,GO:0001775,GO:0000278,GO:…	immune effector process,immune system process,cellular response to chemical stimulus,immune response,cell migration,cell motility,localization of cell,intracellular part,leukocyte migration,cellular component movement,leukocyte chemotaxis,intracellular,intracellular membrane-bounded organelle,intracellular organelle,membrane-bounded organelle,neutrophil chemotaxis,locomotion,cell chemotaxis,estab…	ssc04144	Endocytosis
ENSSSCT00000002094	ENSSSCG00000001869	PEAK1	chr7:61961069-62180499	17.3456	10.8326	0.679196	5e-05	0.00318682	pseudopodium-enriched atypical kinase 1 [Source:HGNC Symbol;Acc:HGNC:29431]	--	--	--	--
ENSSSCT00000001675	ENSSSCG00000001502	RPS18	chr7:34142620-34146677	1408.16	1856.28	-0.398603	0.0052	0.120865	40S ribosomal protein S18 [Source:UniProtKB/Swiss-Prot;Acc:P62272]	--	--	ssc03010	Ribosome
ENSSSCT00000024403	ENSSSCG00000024960	PDGFC	chr8:47675546-47774058	21.2538	16.7654	0.34223	0.02065	0.284335	platelet derived growth factor C [Source:HGNC Symbol;Acc:HGNC:8801]	GO:0010033,GO:0071310,GO:0070887,GO:0048518,GO:0044424,GO:0005622,GO:0048522,GO:0043227,GO:0005515,GO:0048513,GO:0050730,GO:0043226,GO:0005737,GO:2000112,GO:0010556,GO:0060255,GO:0009058,GO:1901576,GO:0032268,GO:0044249,GO:0034645,GO:0046983,GO:0090304,GO:0009059,GO:0008283,GO:0019222,GO:0005575,GO:0031326,GO:0009889,GO:0051246,GO:0009986,GO:0043170,GO:0044260,GO:1901700,GO:0009893,GO:0048146,GO:…	response to organic substance,cellular response to organic substance,cellular response to chemical stimulus,positive regulation of biological process,intracellular part,intracellular,positive regulation of cellular process,membrane-bounded organelle,protein binding,organ development,regulation of peptidyl-tyrosine phosphorylation,organelle,cytoplasm,regulation of cellular macromolecule biosynthet…	ssc05215,ssc04014,ssc04810,ssc04015,ssc04510,ssc05218,ssc04540,ssc04151	Prostate cancer,Ras signaling pathway,Regulation of actin cytoskeleton,Rap1 signaling pathway,Focal adhesion,Melanoma,Gap junction,PI3K-Akt signaling pathway
ENSSSCT00000022802	ENSSSCG00000024260	RPL11	chr6:75499812-75504144	1320.2	1675.68	-0.343988	0.0207	0.284715	60S ribosomal protein L11 [Source:RefSeq peptide;Acc:NP_001001638]	GO:0005829,GO:0005737,GO:0044424,GO:0005622,GO:0043227,GO:0005515,GO:0043226,GO:0043231,GO:0044446,GO:0043229,GO:0044391,GO:0006605,GO:0006412,GO:0044422,GO:0003735,GO:0009058,GO:0030529,GO:0071704,GO:0010467,GO:0044444,GO:0046907,GO:0044237,GO:1901576,GO:0051641,GO:0070013,GO:0044249,GO:0043233,GO:0051649,GO:0031974,GO:0022626,GO:0006886,GO:0005488,GO:0005840,GO:0044428,GO:0005730,GO:0031981,GO:…	cytosol,cytoplasm,intracellular part,intracellular,membrane-bounded organelle,protein binding,organelle,intracellular membrane-bounded organelle,intracellular organelle part,intracellular organelle,ribosomal subunit,protein targeting,translation,organelle part,structural constituent of ribosome,biosynthetic process,ribonucleoprotein complex,organic substance metabolic process,gene expression,cyto…	ssc03010	Ribosome
ENSSSCT00000025469	ENSSSCG00000030404	PAPD5	GL893669.1:62457-79716	42.6673	19.2374	1.14922	5e-05	0.00318682	PAP associated domain containing 5 [Source:HGNC Symbol;Acc:HGNC:30758]	--	--	ssc03018	RNA degradation
ENSSSCT00000023448	ENSSSCG00000022486	CBLB	chr13:162677244-162892743	4.49644	3.03764	0.565835	0.0005	0.0217369	Cbl proto-oncogene B, E3 ubiquitin protein ligase [Source:HGNC Symbol;Acc:HGNC:1542]	GO:0044424,GO:0005622,GO:0043231,GO:0043229,GO:0043227,GO:0005515,GO:0043226,GO:0005737,GO:0005634,GO:0005575,GO:0043170,GO:0044260,GO:0004842,GO:0044446,GO:0005488,GO:0019787,GO:0044422,GO:0071704,GO:0044238,GO:0016881,GO:0016567,GO:0008152,GO:0019538,GO:0065007,GO:0032446,GO:0044237,GO:0044428,GO:0005623,GO:0050789,GO:0044267,GO:0046914,GO:0070647,GO:0016874,GO:0016879,GO:0070013,GO:0043233,GO:…	intracellular part,intracellular,intracellular membrane-bounded organelle,intracellular organelle,membrane-bounded organelle,protein binding,organelle,cytoplasm,nucleus,cellular_component,macromolecule metabolic process,cellular macromolecule metabolic process,ubiquitin-protein ligase activity,intracellular organelle part,binding,small conjugating protein ligase activity,organelle part,organic su…	ssc04144,ssc05200,ssc05220,ssc05205,ssc04660,ssc04630,ssc05100,ssc04012,ssc04120,ssc04910	Endocytosis,Pathways in cancer,Chronic myeloid leukemia,Proteoglycans in cancer,T cell receptor signaling pathway,Jak-STAT signaling pathway,Bacterial invasion of epithelial cells,ErbB signaling pathway,Ubiquitin mediated proteolysis,Insulin signaling pathway
ENSSSCT00000027564	ENSSSCG00000023414	-	chr9:82247899-82252730	5.61001	7.60707	-0.439336	0.0345	0.374358	--	GO:0005575,GO:0004064,GO:0008152,GO:0016788,GO:0003824,GO:0016020,GO:0052689,GO:0016787,GO:0003674,GO:0008150,GO:0044425,GO:0016021,GO:0031224	cellular_component,arylesterase activity,metabolic process,hydrolase activity, acting on ester bonds,catalytic activity,membrane,carboxylic ester hydrolase activity,hydrolase activity,molecular_function,biological_process,membrane part,integral to membrane,intrinsic to membrane	--	--
ENSSSCT00000023998	ENSSSCG00000021472	POLR2E	chr2:77655740-77666785	126.171	152.196	-0.270552	0.0493	0.448121	polymerase (RNA) II (DNA directed) polypeptide E, 25kDa [Source:HGNC Symbol;Acc:HGNC:9192]	--	--	ssc04623,ssc00240,ssc00230,ssc05169,ssc03020,ssc05016,ssc01100	Cytosolic DNA-sensing pathway,Pyrimidine metabolism,Purine metabolism,Epstein-Barr virus infection,RNA polymerase,Huntington's disease,Metabolic pathways
ENSSSCT00000029345	ENSSSCG00000023110	UBXN1	chr2:8418717-8421327	172.605	213.078	-0.303907	0.025	0.313296	UBX domain protein 1 [Source:HGNC Symbol;Acc:HGNC:18402]	--	--	--	--
ENSSSCT00000033400	ENSSSCG00000012880	-	chr2:2815219-2874163	10.4081	7.51408	0.470043	0.0102	0.185383	--	--	--	ssc01212,ssc00071,ssc04152,ssc03320,ssc04920	Fatty acid metabolism,Fatty acid degradation,AMPK signaling pathway,PPAR signaling pathway,Adipocytokine signaling pathway
ENSSSCT00000028571	ENSSSCG00000027757	FIS1	GL896338.2:43697-47176	116.326	158.746	-0.448545	0.0015	0.0500542	fission, mitochondrial 1 [Source:HGNC Symbol;Acc:HGNC:21689]	GO:0065008,GO:0042592,GO:0048518,GO:2001235,GO:0044424,GO:0097190,GO:0005622,GO:0048522,GO:0043231,GO:0043229,GO:0043227,GO:0012501,GO:0005829,GO:0051649,GO:0008219,GO:0016265,GO:0043280,GO:0005515,GO:0006915,GO:0043226,GO:0005737,GO:2001056,GO:0010638,GO:0032879,GO:0051641,GO:0010950,GO:0005783,GO:0005777,GO:0042579,GO:0010952,GO:0022603,GO:0044444,GO:2001233,GO:0048584,GO:0019222,GO:0005575,GO:…	regulation of biological quality,homeostatic process,positive regulation of biological process,positive regulation of apoptotic signaling pathway,intracellular part,apoptotic signaling pathway,intracellular,positive regulation of cellular process,intracellular membrane-bounded organelle,intracellular organelle,membrane-bounded organelle,programmed cell death,cytosol,establishment of localization …	--	--
ENSSSCT00000028570	ENSSSCG00000027209	-	chr13:141934254-141974960	12.9442	21.6217	-0.740178	0.0214	0.290335	--	GO:0034655,GO:0005515,GO:0009117,GO:0006753,GO:0044248,GO:0044270,GO:0046700,GO:0019637,GO:0005488,GO:0019439,GO:1901361,GO:0055086,GO:0009141,GO:0044281,GO:0009056,GO:0065009,GO:0051336,GO:0009143,GO:0009146,GO:0006195,GO:0009166,GO:1901292,GO:0072523,GO:0046434,GO:0050790,GO:0031329,GO:0009144,GO:1901136,GO:0006796,GO:0006793,GO:1901135,GO:0009894,GO:0003674,GO:1901575,GO:0044238,GO:0034641,GO:…	nucleobase-containing compound catabolic process,protein binding,nucleotide metabolic process,nucleoside phosphate metabolic process,cellular catabolic process,cellular nitrogen compound catabolic process,heterocycle catabolic process,organophosphate metabolic process,binding,aromatic compound catabolic process,organic cyclic compound catabolic process,nucleobase-containing small molecule metabol…	ssc04144	Endocytosis
ENSSSCT00000000316	ENSSSCG00000000295	-	chr5:20677943-20695280	142.992	118.281	0.273717	0.04335	0.42076	--	--	--	ssc04810	Regulation of actin cytoskeleton
ENSSSCT00000000314	ENSSSCG00000000293	ITGA5	chr5:20442127-20465312	18.3346	14.1689	0.371836	0.00935	0.175931	integrin subunit alpha 5 [Source:HGNC Symbol;Acc:HGNC:6141]	GO:0016477,GO:0048870,GO:0051674,GO:0007229,GO:0048518,GO:0044424,GO:0006928,GO:0006950,GO:0007610,GO:0043235,GO:0005622,GO:0048522,GO:0043231,GO:0043229,GO:0043227,GO:0012501,GO:0040011,GO:0008219,GO:0016265,GO:0008305,GO:0005515,GO:0006915,GO:0009888,GO:0050730,GO:0050731,GO:0009897,GO:0043226,GO:0005737,GO:0070161,GO:0060255,GO:0032587,GO:0005783,GO:0032268,GO:0007369,GO:0048646,GO:0048729,GO:…	cell migration,cell motility,localization of cell,integrin-mediated signaling pathway,positive regulation of biological process,intracellular part,cellular component movement,response to stress,behavior,receptor complex,intracellular,positive regulation of cellular process,intracellular membrane-bounded organelle,intracellular organelle,membrane-bounded organelle,programmed cell death,locomotion,…	ssc05133,ssc04640,ssc05412,ssc05205,ssc05100,ssc04810,ssc04145,ssc05414,ssc04510,ssc05410,ssc04151,ssc05206,ssc04512	Pertussis,Hematopoietic cell lineage,Arrhythmogenic right ventricular cardiomyopathy (ARVC),Proteoglycans in cancer,Bacterial invasion of epithelial cells,Regulation of actin cytoskeleton,Phagosome,Dilated cardiomyopathy,Focal adhesion,Hypertrophic cardiomyopathy (HCM),PI3K-Akt signaling pathway,MicroRNAs in cancer,ECM-receptor interaction
ENSSSCT00000000313	ENSSSCG00000000292	ZNF385A	chr5:20417578-20434468	6.46823	4.09591	0.659189	0.00065	0.026683	zinc finger protein 385A [Source:HGNC Symbol;Acc:HGNC:17521]	GO:0002376,GO:0065008,GO:0010608,GO:0030097,GO:0048518,GO:0044424,GO:0003723,GO:0006417,GO:0006950,GO:0007610,GO:0002520,GO:0010468,GO:0048534,GO:0097190,GO:0005622,GO:0048522,GO:0010467,GO:0043231,GO:0043229,GO:0043227,GO:0012501,GO:0008219,GO:0016265,GO:0005515,GO:0048513,GO:0006915,GO:0035855,GO:0043226,GO:2000112,GO:0051641,GO:0010556,GO:0030099,GO:0060255,GO:0009058,GO:1901576,GO:0032268,GO:…	immune system process,regulation of biological quality,posttranscriptional regulation of gene expression,hemopoiesis,positive regulation of biological process,intracellular part,RNA binding,regulation of translation,response to stress,behavior,immune system development,regulation of gene expression,hematopoietic or lymphoid organ development,apoptotic signaling pathway,intracellular,positive regu…	--	--
ENSSSCT00000029629	ENSSSCG00000027849	CNR2	chr6:75364735-75365818	2.53927	3.66927	-0.531077	0.04245	0.416856	cannabinoid receptor 2 [Source:HGNC Symbol;Acc:HGNC:2160]	GO:0005575,GO:0004949,GO:0038171,GO:0016020,GO:0003674,GO:0050896,GO:0050789,GO:0009987,GO:0065007,GO:0050794,GO:0007166,GO:0051716,GO:0044763,GO:0008150,GO:0044699,GO:0007165,GO:0023052,GO:0044425,GO:0044700,GO:0007154,GO:0016021,GO:0031224,GO:0004871,GO:0060089,GO:0004888,GO:0004872,GO:0038023,GO:0007186,GO:0004930	cellular_component,cannabinoid receptor activity,cannabinoid signaling pathway,membrane,molecular_function,response to stimulus,regulation of biological process,cellular process,biological regulation,regulation of cellular process,cell surface receptor signaling pathway,cellular response to stimulus,single-organism cellular process,biological_process,single-organism process,signal transduction,si…	ssc04080	Neuroactive ligand-receptor interaction
ENSSSCT00000001190	ENSSSCG00000001094	C6orf62	chr7:20661719-20675397	55.3444	44.0394	0.329643	0.0164	0.249672	chromosome 6 open reading frame 62 [Source:HGNC Symbol;Acc:HGNC:20998]	--	--	--	--
ENSSSCT00000006084	ENSSSCG00000005533	PTGS1	chr1:294753877-294780705	0.488548	0.255889	0.932983	0.00955	0.17777	prostaglandin-endoperoxide synthase 1 (prostaglandin G/H synthase and cyclooxygenase) [Source:HGNC Symbol;Acc:HGNC:9604]	--	--	ssc04611,ssc04726,ssc00590,ssc01100	Platelet activation,Serotonergic synapse,Arachidonic acid metabolism,Metabolic pathways
ENSSSCT00000009504	ENSSSCG00000008687	MXD4	chr8:697974-708656	34.931	45.0913	-0.368341	0.0211	0.287937	MAX dimerization protein 4 [Source:HGNC Symbol;Acc:HGNC:13906]	GO:0005515,GO:0005488,GO:0046983,GO:0003674	protein binding,binding,protein dimerization activity,molecular_function	--	--
ENSSSCT00000003773	ENSSSCG00000003401	KIF1B	chr6:64444215-64593489	22.5467	18.469	0.287814	0.0363	0.384261	kinesin family member 1B [Source:HGNC Symbol;Acc:HGNC:16636]	--	--	--	--
ENSSSCT00000024678	ENSSSCG00000025417	BBS2	chr6:26446674-26473876	2.29985	3.31955	-0.529444	0.0151	0.237329	Bardet-Biedl syndrome 2 [Source:HGNC Symbol;Acc:HGNC:967]	GO:0010033,GO:0071310,GO:0065008,GO:0042592,GO:0070887,GO:0048870,GO:0051674,GO:0034097,GO:0048518,GO:0044424,GO:0006928,GO:0007610,GO:0010468,GO:0005622,GO:0071345,GO:0010467,GO:0043231,GO:0043229,GO:0043227,GO:0019221,GO:0040011,GO:0051649,GO:0005515,GO:0048513,GO:0009888,GO:0045926,GO:0043226,GO:0032879,GO:0051641,GO:0051216,GO:0060255,GO:0048646,GO:0019222,GO:0005575,GO:0040015,GO:0045444,GO:…	response to organic substance,cellular response to organic substance,regulation of biological quality,homeostatic process,cellular response to chemical stimulus,cell motility,localization of cell,response to cytokine stimulus,positive regulation of biological process,intracellular part,cellular component movement,behavior,regulation of gene expression,intracellular,cellular response to cytokine s…	--	--
ENSSSCT00000024674	ENSSSCG00000027378	SH3PXD2B	chr16:56137620-56228713	5.36783	3.7659	0.511344	0.0007	0.0281778	SH3 and PX domains 2B [Source:HGNC Symbol;Acc:HGNC:29242]	--	--	--	--
ENSSSCT00000022632	ENSSSCG00000028108	ASAP3	GL893190.1:3720-15702	4.1928	1.21429	1.7878	5e-05	0.00318682	ArfGAP with SH3 domain, ankyrin repeat and PH domain 3 [Source:HGNC Symbol;Acc:HGNC:14987]	--	--	ssc04144,ssc04666	Endocytosis,Fc gamma R-mediated phagocytosis
ENSSSCT00000022638	ENSSSCG00000023062	HTATSF1	chrX:127482186-127501139	5.76595	7.64173	-0.40634	0.00965	0.178931	HIV-1 Tat specific factor 1 [Source:HGNC Symbol;Acc:HGNC:5276]	--	--	--	--
ENSSSCT00000027714	ENSSSCG00000023609	TP53INP1	chr4:45000112-45019079	37.5889	46.7266	-0.313936	0.0228	0.299842	tumor protein p53 inducible nuclear protein 1 [Source:HGNC Symbol;Acc:HGNC:18022]	--	--	ssc05166	HTLV-I infection
ENSSSCT00000019480	ENSSSCG00000017900	KIF1C	chr12:53966167-53993410	16.5723	20.5044	-0.307159	0.0241	0.306934	kinesin family member 1C [Source:HGNC Symbol;Acc:HGNC:6317]	--	--	--	--
ENSSSCT00000019483	ENSSSCG00000017903	SPAG7	chr12:54017614-54022294	46.5608	62.8625	-0.433086	0.0035	0.0919229	sperm associated antigen 7 [Source:HGNC Symbol;Acc:HGNC:11216]	--	--	--	--
ENSSSCT00000008903	ENSSSCG00000008127	-	chr3:48999577-49084089	36.5912	29.2609	0.322522	0.0211	0.287937	--	--	--	ssc03040	Spliceosome
ENSSSCT00000008906	ENSSSCG00000008129	-	chr3:49095976-49102268	38.1086	30.1451	0.338195	0.0189	0.270212	--	--	--	--	--
ENSSSCT00000008904	ENSSSCG00000008128	DUSP2	chr3:49192956-49195006	27.9426	40.8417	-0.547577	0.00025	0.0125444	dual specificity phosphatase 2 [Source:HGNC Symbol;Acc:HGNC:3068]	--	--	ssc04010	MAPK signaling pathway
ENSSSCT00000010857	ENSSSCG00000009907	-	chr14:42881476-42890287	23.8614	32.0253	-0.424536	0.0378	0.392123	--	--	--	ssc01100,ssc00970	Metabolic pathways,Aminoacyl-tRNA biosynthesis
ENSSSCT00000016332	ENSSSCG00000014970	MTMR2	chr9:31847000-31911142	17.5938	14.385	0.290499	0.04695	0.437437	myotubularin related protein 2 [Source:HGNC Symbol;Acc:HGNC:7450]	--	--	--	--
ENSSSCT00000016333	ENSSSCG00000014971	-	chr9:32147046-32148586	6.41974	4.73769	0.438332	0.03085	0.352531	--	--	--	ssc04330	Notch signaling pathway
ENSSSCT00000011109	ENSSSCG00000010146	LGALS8	chr14:58845934-58865765	109.069	61.0253	0.837758	5e-05	0.00318682	lectin, galactoside-binding, soluble, 8 [Source:HGNC Symbol;Acc:HGNC:6569]	--	--	--	--
ENSSSCT00000004106	ENSSSCG00000003707	NPC1	chr6:101000228-101049509	105.568	77.3652	0.448412	0.0014	0.0476023	Niemann-Pick disease, type C1 [Source:HGNC Symbol;Acc:HGNC:7897]	--	--	ssc04142	Lysosome
ENSSSCT00000018466	ENSSSCG00000016957	CD180	chr16:49212320-49229137	3.31172	2.14109	0.629237	0.00295	0.0821063	CD180 molecule [Source:HGNC Symbol;Acc:HGNC:6726]	--	--	--	--
ENSSSCT00000002626	ENSSSCG00000002362	-	chr7:103411780-103428283	8.0231	4.19966	0.933887	5e-05	0.00318682	--	--	--	ssc02010,ssc04146	ABC transporters,Peroxisome
ENSSSCT00000003573	ENSSSCG00000003217	JOSD2	chr6:51185526-51189977	35.5413	49.8058	-0.486817	0.0019	0.059695	Josephin domain containing 2 [Source:HGNC Symbol;Acc:HGNC:28853]	--	--	--	--
ENSSSCT00000013193	ENSSSCG00000012061	PIGP	chr13:210760406-210768763	17.7016	24.6084	-0.475269	0.01765	0.259737	phosphatidylinositol glycan anchor biosynthesis class P [Source:HGNC Symbol;Acc:HGNC:3046]	--	--	ssc00563,ssc01100	Glycosylphosphatidylinositol(GPI)-anchor biosynthesis,Metabolic pathways
ENSSSCT00000013194	ENSSSCG00000012062	TTC3	chr13:210781583-210875732	32.67	42.167	-0.36815	0.0085	0.16693	tetratricopeptide repeat domain 3 [Source:HGNC Symbol;Acc:HGNC:12393]	--	--	ssc04010	MAPK signaling pathway
ENSSSCT00000022386	ENSSSCG00000028419	-	GL896009.2:6006-28889	13.0989	9.65235	0.440489	0.02615	0.321526	--	--	--	--	--
ENSSSCT00000000120	ENSSSCG00000000114	PICK1	chr5:7208087-7224935	18.9979	23.4299	-0.302512	0.04085	0.40842	protein interacting with PRKCA 1 [Source:HGNC Symbol;Acc:HGNC:9394]	--	--	--	--
ENSSSCT00000027263	ENSSSCG00000022916	EVL	GL894354.1:8416-19888	7.74388	1.77212	2.12758	5e-05	0.00318682	Enah/Vasp-like [Source:HGNC Symbol;Acc:HGNC:20234]	GO:0005515,GO:0005622,GO:0048523,GO:0044424,GO:0048519,GO:0005737,GO:0005488,GO:0051129,GO:0051130,GO:0044464,GO:0005623,GO:0048522,GO:0031252,GO:0032879,GO:1900028,GO:0031334,GO:0005522,GO:0033043,GO:0031345,GO:0048518,GO:0030838,GO:0010638,GO:0043254,GO:0051128,GO:0001667,GO:0032273,GO:0010632,GO:0065008,GO:0003674,GO:0030027,GO:1900027,GO:0051258,GO:0044699,GO:0006996,GO:0032535,GO:0040013,GO:…	protein binding,intracellular,negative regulation of cellular process,intracellular part,negative regulation of biological process,cytoplasm,binding,negative regulation of cellular component organization,positive regulation of cellular component organization,cell part,cell,positive regulation of cellular process,cell leading edge,regulation of localization,negative regulation of ruffle assembly,p…	--	--
ENSSSCT00000018269	ENSSSCG00000016782	FAM105A	chr16:4329879-4338069	75.3946	96.3867	-0.354374	0.01145	0.199551	family with sequence similarity 105 member A [Source:HGNC Symbol;Acc:HGNC:25629]	--	--	--	--
ENSSSCT00000017207	ENSSSCG00000015801	TLR3	chr15:53840782-53852536	3.89778	0.994286	1.97092	5e-05	0.00318682	toll-like receptor 3 [Source:HGNC Symbol;Acc:HGNC:11849]	--	--	ssc05164,ssc05168,ssc04620,ssc05161,ssc05160	Influenza A,Herpes simplex infection,Toll-like receptor signaling pathway,Hepatitis B,Hepatitis C
ENSSSCT00000017206	ENSSSCG00000015801	TLR3	chr15:53840782-53852536	1.55259	0.354517	2.13075	0.0235	0.302646	toll-like receptor 3 [Source:HGNC Symbol;Acc:HGNC:11849]	--	--	ssc05164,ssc05168,ssc04620,ssc05161,ssc05160	Influenza A,Herpes simplex infection,Toll-like receptor signaling pathway,Hepatitis B,Hepatitis C
ENSSSCT00000028101	ENSSSCG00000004594	-	chr1:125355480-125379412	26.0253	18.9695	0.456232	0.04925	0.447928	--	--	--	--	--
ENSSSCT00000023823	ENSSSCG00000025352	-	chr1:14740235-14753007	2.05869	2.66938	-0.374777	0.0482	0.443261	--	--	--	--	--
ENSSSCT00000029270	ENSSSCG00000027660	IFI44L	chr6:124816722-124835978	226.043	45.3356	2.31788	5e-05	0.00318682	interferon induced protein 44 like [Source:HGNC Symbol;Acc:HGNC:17817]	--	--	--	--
ENSSSCT00000008714	ENSSSCG00000007951	CREBBP	chr3:39539011-39798202	5.28855	3.53246	0.5822	0.0008	0.0312581	CREB binding protein [Source:HGNC Symbol;Acc:HGNC:2348]	--	--	--	--
ENSSSCT00000012662	ENSSSCG00000011570	IRAK2	chr13:73509522-73515894	63.9605	50.6681	0.336104	0.01905	0.271313	-	--	--	--	--
ENSSSCT00000014793	ENSSSCG00000013545	TUBB4A	chr2:73063906-73085299	1.04614	0.516026	1.01957	0.0018	0.0573344	tubulin beta 4A class IVa [Source:HGNC Symbol;Acc:HGNC:20774]	--	--	ssc04145,ssc04540	Phagosome,Gap junction
ENSSSCT00000009396	ENSSSCG00000008586	TP53I3	chr3:121865411-121870296	2.02615	3.32864	-0.716191	0.0064	0.139488	tumor protein p53 inducible protein 3 [Source:HGNC Symbol;Acc:HGNC:19373]	GO:0043227,GO:0005515,GO:0043226,GO:0071704,GO:0044237,GO:0097159,GO:1901363,GO:0005488,GO:0044238,GO:0005575,GO:0008152,GO:0046983,GO:0000166,GO:1901265,GO:1901360,GO:0044281,GO:0046914,GO:0036094,GO:0016655,GO:0042802,GO:0048038,GO:0008270,GO:0006807,GO:0034641,GO:0046483,GO:0042803,GO:0003960,GO:0006725,GO:0006139,GO:0009117,GO:0006753,GO:0055086,GO:0006796,GO:0006793,GO:0044710,GO:0031988,GO:…	membrane-bounded organelle,protein binding,organelle,organic substance metabolic process,cellular metabolic process,organic cyclic compound binding,heterocyclic compound binding,binding,primary metabolic process,cellular_component,metabolic process,protein dimerization activity,nucleotide binding,nucleoside phosphate binding,organic cyclic compound metabolic process,small molecule metabolic proce…	ssc04115	p53 signaling pathway
ENSSSCT00000013222	ENSSSCG00000012088	-	chr13:217908522-217920269	9.39109	12.5291	-0.415923	0.0087	0.169029	--	--	--	ssc00514	Other types of O-glycan biosynthesis
ENSSSCT00000007259	ENSSSCG00000006625	RFX5	chr4:107103118-107109545	9.38874	5.99311	0.647627	5e-05	0.00318682	regulatory factor X5 [Source:HGNC Symbol;Acc:HGNC:9986]	--	--	ssc05152,ssc04612,ssc05340	Tuberculosis,Antigen processing and presentation,Primary immunodeficiency
ENSSSCT00000007258	ENSSSCG00000006624	SELENBP1	chr4:107086234-107095113	2.10906	2.98767	-0.502421	0.0271	0.327953	selenium binding protein 1 [Source:HGNC Symbol;Acc:HGNC:10719]	--	--	--	--
ENSSSCT00000007256	ENSSSCG00000006622	POGZ	chr4:106925461-107034070	4.60071	3.67472	0.324222	0.03615	0.383438	pogo transposable element with ZNF domain [Source:HGNC Symbol;Acc:HGNC:18801]	--	--	--	--
ENSSSCT00000005046	ENSSSCG00000004567	APH1B	chr1:119981030-119988575	4.00647	7.06453	-0.818263	0.00445	0.108492	aph-1 homolog B, gamma secretase subunit [Source:HGNC Symbol;Acc:HGNC:24080]	GO:0043231,GO:0043229,GO:0005515,GO:0005488,GO:0044444,GO:0044424,GO:0005737,GO:0003824,GO:0043227,GO:0043226,GO:0005622,GO:0065009,GO:0030133,GO:0050790,GO:0016485,GO:0003674,GO:0044238,GO:0016787,GO:0051604,GO:0008233,GO:0010467,GO:0071704,GO:0008152,GO:0019222,GO:0031410,GO:0044464,GO:0005623,GO:0043170,GO:0019538,GO:0044425,GO:0016020,GO:0043085,GO:0050789,GO:0065007,GO:0005575,GO:0044093,GO:…	intracellular membrane-bounded organelle,intracellular organelle,protein binding,binding,cytoplasmic part,intracellular part,cytoplasm,catalytic activity,membrane-bounded organelle,organelle,intracellular,regulation of molecular function,transport vesicle,regulation of catalytic activity,protein processing,molecular_function,primary metabolic process,hydrolase activity,protein maturation,peptidas…	--	--
ENSSSCT00000006661	ENSSSCG00000006070	COX6C	chr4:39990793-40005773	576.139	718.118	-0.317805	0.0216	0.291885	cytochrome c oxidase subunit VIc [Source:HGNC Symbol;Acc:HGNC:2285]	--	--	ssc04932,ssc05010,ssc05016,ssc00190,ssc05012,ssc04260,ssc01100	Non-alcoholic fatty liver disease (NAFLD),Alzheimer's disease,Huntington's disease,Oxidative phosphorylation,Parkinson's disease,Cardiac muscle contraction,Metabolic pathways
ENSSSCT00000003052	ENSSSCG00000002755	NFAT5	chr6:16261576-16381887	12.0895	9.51272	0.345827	0.02385	0.305237	nuclear factor of activated T-cells 5, tonicity-responsive [Source:HGNC Symbol;Acc:HGNC:7774]	--	--	--	--
ENSSSCT00000000081	ENSSSCG00000000075	MKL1	chr5:5189688-5207389	5.23148	3.99117	0.390408	0.02895	0.340348	megakaryoblastic leukemia (translocation) 1 [Source:HGNC Symbol;Acc:HGNC:14334]	--	--	--	--
ENSSSCT00000000084	ENSSSCG00000000078	TNRC6B	chr5:5297077-5431373	7.7984	6.15459	0.341514	0.0457	0.431183	trinucleotide repeat containing 6B [Source:HGNC Symbol;Acc:HGNC:29190]	--	--	--	--
ENSSSCT00000002833	ENSSSCG00000002550	C14orf2	chr7:131028039-131033988	428.342	521.762	-0.284626	0.0355	0.379843	chromosome 14 open reading frame 2 [Source:HGNC Symbol;Acc:HGNC:1188]	--	--	--	--
ENSSSCT00000034848	ENSSSCG00000008977	CXCL10	chr8:75809804-75991009	218.008	1.03352	7.72067	5e-05	0.00318682	C-X-C motif chemokine 10 precursor [Source:RefSeq peptide;Acc:NP_001008691]	--	--	ssc05164,ssc04623,ssc04622,ssc04620,ssc04060,ssc04668,ssc04062	Influenza A,Cytosolic DNA-sensing pathway,RIG-I-like receptor signaling pathway,Toll-like receptor signaling pathway,Cytokine-cytokine receptor interaction,TNF signaling pathway,Chemokine signaling pathway
ENSSSCT00000026478	ENSSSCG00000021062	-	chr13:133648768-133649626	0	1.22131	#NAME?	0.02285	0.300182	--	--	--	ssc04070,ssc00564,ssc00561,ssc01100	Phosphatidylinositol signaling system,Glycerophospholipid metabolism,Glycerolipid metabolism,Metabolic pathways
ENSSSCT00000024838	ENSSSCG00000003684	MTCL1	chr6:92351813-92436829	0.841086	1.43425	-0.769975	0.0038	0.09698	microtubule crosslinking factor 1 [Source:HGNC Symbol;Acc:HGNC:29121]	GO:0016328,GO:2000574,GO:2000576,GO:0016327,GO:0010506,GO:0097427,GO:0043229,GO:0006914,GO:0090313,GO:0090314,GO:0035088,GO:0045197,GO:0061245,GO:0005515,GO:0044248,GO:0005488,GO:0044424,GO:0001578,GO:0051223,GO:0043226,GO:0005622,GO:0070201,GO:0015630,GO:0009056,GO:0005856,GO:0065009,GO:0051336,GO:0060341,GO:0032880,GO:0006612,GO:0032386,GO:0000226,GO:0000922,GO:0044446,GO:0046983,GO:0030496,GO:…	lateral plasma membrane,regulation of microtubule motor activity,positive regulation of microtubule motor activity,apicolateral plasma membrane,regulation of autophagy,microtubule bundle,intracellular organelle,autophagy,regulation of protein targeting to membrane,positive regulation of protein targeting to membrane,establishment or maintenance of apical/basal cell polarity,establishment or maint…	--	--
ENSSSCT00000016145	ENSSSCG00000014794	NUP98	chr9:7103731-7180647	23.7114	18.8795	0.328764	0.01565	0.2426	nucleoporin 98kDa [Source:HGNC Symbol;Acc:HGNC:8068]	--	--	ssc05164,ssc03013	Influenza A,RNA transport
ENSSSCT00000008556	ENSSSCG00000007808	NFATC2IP	chr3:18796318-18810914	5.46714	4.2703	0.35645	0.0248	0.311891	nuclear factor of activated T-cells, cytoplasmic, calcineurin-dependent 2 interacting protein [Source:HGNC Symbol;Acc:HGNC:25906]	--	--	--	--
ENSSSCT00000013302	ENSSSCG00000012161	MAP7D2	chrX:17593221-17690099	6.63847	8.3405	-0.329284	0.03335	0.367846	MAP7 domain containing 2 [Source:HGNC Symbol;Acc:HGNC:25899]	--	--	--	--
ENSSSCT00000016961	ENSSSCG00000015570	IVNS1ABP	chr9:138907582-138917438	75.2065	95.0895	-0.338428	0.01425	0.228964	influenza virus NS1A binding protein [Source:HGNC Symbol;Acc:HGNC:16951]	--	--	ssc05164	Influenza A
ENSSSCT00000013871	ENSSSCG00000012688	ZNF449	chrX:126844242-126846952	2.06087	3.40093	-0.722672	0.0373	0.389327	zinc finger protein 449 [Source:HGNC Symbol;Acc:HGNC:21039]	--	--	--	--
ENSSSCT00000004007	ENSSSCG00000003612	EIF3I	chr6:82728284-82737483	142.582	171.913	-0.269879	0.04735	0.439303	eukaryotic translation initiation factor 3 subunit I [Source:HGNC Symbol;Acc:HGNC:3272]	--	--	ssc03013	RNA transport
ENSSSCT00000011430	ENSSSCG00000010445	ANKRD22	chr14:109732653-109744247	10.7842	8.1928	0.396493	0.0355	0.379843	ankyrin repeat domain 22 [Source:HGNC Symbol;Acc:HGNC:28321]	--	--	--	--
ENSSSCT00000011435	ENSSSCG00000010449	CH25H	chr14:110108611-110109424	13.308	9.74364	0.449759	0.0275	0.330547	cholesterol 25-hydroxylase [Source:HGNC Symbol;Acc:HGNC:1907]	GO:0044283,GO:0044711,GO:0016053,GO:0046394,GO:0032787,GO:0009058,GO:0071704,GO:0044237,GO:1901576,GO:0044249,GO:0005488,GO:0006631,GO:0008203,GO:0044238,GO:0005575,GO:0008202,GO:0016125,GO:0008610,GO:0044255,GO:0019752,GO:0008152,GO:0006633,GO:0043436,GO:0006082,GO:1901360,GO:0006629,GO:0072330,GO:0044281,GO:0046914,GO:0006066,GO:1901615,GO:0044710,GO:0003824,GO:0016020,GO:0003674,GO:0043167,GO:…	small molecule biosynthetic process,single-organism biosynthetic process,organic acid biosynthetic process,carboxylic acid biosynthetic process,monocarboxylic acid metabolic process,biosynthetic process,organic substance metabolic process,cellular metabolic process,organic substance biosynthetic process,cellular biosynthetic process,binding,fatty acid metabolic process,cholesterol metabolic proce…	ssc00120	Primary bile acid biosynthesis
ENSSSCT00000011437	ENSSSCG00000010451	IFIT2	chr14:110179711-110190465	54.6604	3.36883	4.02018	5e-05	0.00318682	interferon induced protein with tetratricopeptide repeats 2 [Source:HGNC Symbol;Acc:HGNC:5409]	GO:0009615,GO:0051607,GO:0002252,GO:0034340,GO:0051707,GO:0009607,GO:0071357,GO:0045087,GO:0051704,GO:0035455,GO:0006952,GO:0034097,GO:0060337,GO:0035457,GO:0010033,GO:0006950,GO:0071310,GO:0071345,GO:0006955,GO:0002376,GO:0070887,GO:0042802,GO:0042221,GO:0019221,GO:0003723,GO:0005829,GO:0005622,GO:0044424,GO:0032091,GO:0005737,GO:0044092,GO:0050896,GO:0043229,GO:0042981,GO:0043067,GO:0051100,GO:…	response to virus,defense response to virus,immune effector process,response to type I interferon,response to other organism,response to biotic stimulus,cellular response to type I interferon,innate immune response,multi-organism process,response to interferon-alpha,defense response,response to cytokine stimulus,type I interferon-mediated signaling pathway,cellular response to interferon-alpha,re…	--	--
ENSSSCT00000011438	ENSSSCG00000010452	IFIT3	chr14:110209343-110210870	635.029	80.134	2.98634	5e-05	0.00318682	interferon induced protein with tetratricopeptide repeats 3 [Source:HGNC Symbol;Acc:HGNC:5411]	GO:0009615,GO:0051607,GO:0002252,GO:0034340,GO:0051707,GO:0009607,GO:0071357,GO:0045087,GO:0051704,GO:0035455,GO:0006952,GO:0034097,GO:0060337,GO:0035457,GO:0010033,GO:0006950,GO:0071310,GO:0071345,GO:0006955,GO:0002376,GO:0070887,GO:0042802,GO:0042221,GO:0019221,GO:0003723,GO:0005829,GO:0005622,GO:0044424,GO:0005737,GO:0050896,GO:0043229,GO:0042981,GO:0043067,GO:0048519,GO:1901363,GO:0010941,GO:…	response to virus,defense response to virus,immune effector process,response to type I interferon,response to other organism,response to biotic stimulus,cellular response to type I interferon,innate immune response,multi-organism process,response to interferon-alpha,defense response,response to cytokine stimulus,type I interferon-mediated signaling pathway,cellular response to interferon-alpha,re…	--	--
ENSSSCT00000010749	ENSSSCG00000009806	SETD1B	chr14:32669799-32690468	1.22863	0.794366	0.629178	0.0045	0.109311	SET domain containing 1B [Source:HGNC Symbol;Acc:HGNC:29187]	GO:0051568,GO:0034968,GO:0048188,GO:0044428,GO:0016571,GO:0043231,GO:0005634,GO:0043229,GO:0042800,GO:0006479,GO:0008213,GO:0032259,GO:0031981,GO:0005654,GO:0035097,GO:0005515,GO:0070013,GO:0043233,GO:0005488,GO:0031974,GO:0044424,GO:0005737,GO:0034708,GO:0003824,GO:0016278,GO:0016279,GO:0018024,GO:0043414,GO:0043227,GO:0043226,GO:0005622,GO:0042054,GO:0008168,GO:0016741,GO:0044451,GO:0003676,GO:…	histone H3-K4 methylation,histone lysine methylation,Set1C/COMPASS complex,nuclear part,histone methylation,intracellular membrane-bounded organelle,nucleus,intracellular organelle,histone methyltransferase activity (H3-K4 specific),protein methylation,protein alkylation,methylation,nuclear lumen,nucleoplasm,histone methyltransferase complex,protein binding,intracellular organelle lumen,organelle…	ssc00310	Lysine degradation
ENSSSCT00000002936	ENSSSCG00000002646	TRAPPC2L	chr6:1055727-1059412	37.6697	52.2964	-0.473308	0.0049	0.115959	trafficking protein particle complex 2-like [Source:HGNC Symbol;Acc:HGNC:30887]	--	--	--	--
ENSSSCT00000004691	ENSSSCG00000004244	MAN1A1	chr1:47894683-48057901	37.0527	44.9602	-0.279071	0.0402	0.404821	mannosidase, alpha, class 1A, member 1 [Source:HGNC Symbol;Acc:HGNC:6821]	--	--	ssc01100,ssc04141,ssc00510	Metabolic pathways,Protein processing in endoplasmic reticulum,N-Glycan biosynthesis
ENSSSCT00000025549	ENSSSCG00000023052	-	chr6:96830847-96891401	20.6178	16.174	0.35022	0.0161	0.246744	--	GO:0044424,GO:0005622,GO:0005515,GO:0043226,GO:0043229,GO:0097159,GO:1901363,GO:0005488,GO:0005575,GO:0051276,GO:0000166,GO:1901265,GO:0036094,GO:0005623,GO:0006996,GO:0043228,GO:0043232,GO:0044464,GO:0005524,GO:0016043,GO:0035639,GO:0001883,GO:0032550,GO:0032559,GO:0071840,GO:0001882,GO:0032549,GO:0030554,GO:0003674,GO:0032555,GO:0017076,GO:0032553,GO:0043168,GO:0005694,GO:0043167,GO:0009987,GO:…	intracellular part,intracellular,protein binding,organelle,intracellular organelle,organic cyclic compound binding,heterocyclic compound binding,binding,cellular_component,chromosome organization,nucleotide binding,nucleoside phosphate binding,small molecule binding,cell,organelle organization,non-membrane-bounded organelle,intracellular non-membrane-bounded organelle,cell part,ATP binding,cellul…	--	--
ENSSSCT00000009448	ENSSSCG00000008636	-	chr3:135029577-135034074	6.64499	10.1722	-0.614291	0.03635	0.384541	--	--	--	--	--
ENSSSCT00000023650	ENSSSCG00000021359	-	chr3:108936243-108958888	31.7871	42.4389	-0.416942	0.0041	0.102403	--	--	--	--	--
ENSSSCT00000029425	ENSSSCG00000028278	-	chr12:54955583-54972426	14.2263	10.1651	0.484942	0.00205	0.0631641	--	--	--	ssc05168,ssc00240,ssc03020,ssc00230,ssc05016,ssc05169,ssc01100	Herpes simplex infection,Pyrimidine metabolism,RNA polymerase,Purine metabolism,Huntington's disease,Epstein-Barr virus infection,Metabolic pathways
ENSSSCT00000011635	ENSSSCG00000010638	TCF7L2	chr14:134586335-134788242	3.52307	2.24844	0.647908	0.0028	0.0791836	transcription factor 7-like 2 (T-cell specific, HMG-box) [Source:HGNC Symbol;Acc:HGNC:11641]	--	--	ssc05221,ssc05210,ssc05200,ssc04916,ssc05217,ssc05215,ssc04390,ssc05216,ssc05412,ssc05213,ssc04520,ssc04310	Acute myeloid leukemia,Colorectal cancer,Pathways in cancer,Melanogenesis,Basal cell carcinoma,Prostate cancer,Hippo signaling pathway,Thyroid cancer,Arrhythmogenic right ventricular cardiomyopathy (ARVC),Endometrial cancer,Adherens junction,Wnt signaling pathway
ENSSSCT00000018758	ENSSSCG00000017231	NAT9	chr12:6449635-6453205	18.8948	24.5956	-0.380411	0.0209	0.286327	N-acetyltransferase 9 (GCN5-related, putative) [Source:HGNC Symbol;Acc:HGNC:23133]	--	--	--	--
ENSSSCT00000018757	ENSSSCG00000017230	TMEM104	chr12:6395984-6448552	4.96323	2.96452	0.74348	0.00055	0.0234187	transmembrane protein 104 [Source:HGNC Symbol;Acc:HGNC:25984]	--	--	--	--
ENSSSCT00000010588	ENSSSCG00000009657	PPP2R2A	chr14:11360497-11448854	19.0578	9.52427	1.0007	5e-05	0.00318682	protein phosphatase 2 regulatory subunit B, alpha [Source:HGNC Symbol;Acc:HGNC:9304]	--	--	ssc05160,ssc05142,ssc04261,ssc04728,ssc04530,ssc04390,ssc04151,ssc04152,ssc03015	Hepatitis C,Chagas disease (American trypanosomiasis),Adrenergic signaling in cardiomyocytes,Dopaminergic synapse,Tight junction,Hippo signaling pathway,PI3K-Akt signaling pathway,AMPK signaling pathway,mRNA surveillance pathway
ENSSSCT00000017915	ENSSSCG00000016452	GIMAP8	chr18:6894510-6906676	73.4076	53.3947	0.459234	0.0008	0.0312581	GTPase, IMAP family member 8 [Source:HGNC Symbol;Acc:HGNC:21792]	GO:0005737,GO:0044424,GO:0005622,GO:0043227,GO:0043226,GO:0043231,GO:0044446,GO:0043229,GO:0044422,GO:0070013,GO:0043233,GO:0097159,GO:1901363,GO:0031974,GO:0005488,GO:0044428,GO:0031981,GO:0005575,GO:0005634,GO:0000166,GO:1901265,GO:0036094,GO:0070232,GO:0043067,GO:0012501,GO:0005623,GO:0008219,GO:0016265,GO:0006915,GO:0005654,GO:0042981,GO:0044464,GO:0010941,GO:0070231,GO:0035639,GO:0001883,GO:…	cytoplasm,intracellular part,intracellular,membrane-bounded organelle,organelle,intracellular membrane-bounded organelle,intracellular organelle part,intracellular organelle,organelle part,intracellular organelle lumen,organelle lumen,organic cyclic compound binding,heterocyclic compound binding,membrane-enclosed lumen,binding,nuclear part,nuclear lumen,cellular_component,nucleus,nucleotide bindi…	--	--
ENSSSCT00000017912	ENSSSCG00000016449	GIMAP2	chr18:6731368-6733669	14.3554	18.5295	-0.368234	0.0264	0.323272	GTPase, IMAP family member 2 [Source:HGNC Symbol;Acc:HGNC:21789]	GO:0005737,GO:0044424,GO:0005622,GO:0044444,GO:0097159,GO:1901363,GO:0005488,GO:0005575,GO:0000166,GO:1901265,GO:0036094,GO:0005811,GO:0005623,GO:0044464,GO:0016020,GO:0035639,GO:0001883,GO:0032550,GO:0001882,GO:0032549,GO:0003674,GO:0032555,GO:0017076,GO:0032553,GO:0043168,GO:0043167,GO:0005525,GO:0019001,GO:0032561,GO:0044425,GO:0016021,GO:0031224	cytoplasm,intracellular part,intracellular,cytoplasmic part,organic cyclic compound binding,heterocyclic compound binding,binding,cellular_component,nucleotide binding,nucleoside phosphate binding,small molecule binding,lipid particle,cell,cell part,membrane,purine ribonucleoside triphosphate binding,purine nucleoside binding,purine ribonucleoside binding,nucleoside binding,ribonucleoside binding…	--	--
ENSSSCT00000009749	ENSSSCG00000008902	PPAT	chr8:57849569-57897262	1.18674	1.69265	-0.512278	0.0282	0.335347	phosphoribosyl pyrophosphate amidotransferase [Source:HGNC Symbol;Acc:HGNC:9238]	GO:0046148,GO:0042440,GO:0009058,GO:0071704,GO:0044237,GO:1901576,GO:0044249,GO:0006188,GO:0006189,GO:0009113,GO:0009127,GO:0009168,GO:0046040,GO:0005488,GO:0046112,GO:1901566,GO:0051536,GO:0051540,GO:0044238,GO:0009165,GO:1901293,GO:0008152,GO:0090407,GO:0009156,GO:1901360,GO:0006144,GO:0044281,GO:0009112,GO:0009124,GO:0006807,GO:0034641,GO:0046483,GO:0009126,GO:0009167,GO:0016757,GO:0006725,GO:…	pigment biosynthetic process,pigment metabolic process,biosynthetic process,organic substance metabolic process,cellular metabolic process,organic substance biosynthetic process,cellular biosynthetic process,IMP biosynthetic process,'de novo' IMP biosynthetic process,purine nucleobase biosynthetic process,purine nucleoside monophosphate biosynthetic process,purine ribonucleoside monophosphate bio…	ssc00250,ssc00230,ssc01100	Alanine, aspartate and glutamate metabolism,Purine metabolism,Metabolic pathways
ENSSSCT00000009747	ENSSSCG00000008903	KIAA1211	chr8:57919106-57976230	0.66698	1.05742	-0.664834	0.0171	0.255814	KIAA1211 [Source:HGNC Symbol;Acc:HGNC:29219]	--	--	--	--
ENSSSCT00000009745	ENSSSCG00000008901	PAICS	chr8:57829688-57849457	13.0348	16.7656	-0.363133	0.0235	0.302646	phosphoribosylaminoimidazole carboxylase; phosphoribosylaminoimidazolesuccinocarboxamide synthase [Source:HGNC Symbol;Acc:HGNC:8587]	GO:0005829,GO:0046148,GO:0005737,GO:0044424,GO:0005622,GO:0043227,GO:0005515,GO:0042440,GO:0043226,GO:0009058,GO:0071704,GO:0044444,GO:0044237,GO:1901576,GO:0044249,GO:0097159,GO:1901363,GO:0006188,GO:0006189,GO:0009113,GO:0009127,GO:0009168,GO:0046040,GO:0005488,GO:0046112,GO:1901566,GO:0044238,GO:0005575,GO:0009165,GO:1901293,GO:0008152,GO:0016829,GO:0090407,GO:0009156,GO:0000166,GO:1901265,GO:…	cytosol,pigment biosynthetic process,cytoplasm,intracellular part,intracellular,membrane-bounded organelle,protein binding,pigment metabolic process,organelle,biosynthetic process,organic substance metabolic process,cytoplasmic part,cellular metabolic process,organic substance biosynthetic process,cellular biosynthetic process,organic cyclic compound binding,heterocyclic compound binding,IMP bios…	ssc00230,ssc01100	Purine metabolism,Metabolic pathways
ENSSSCT00000023518	ENSSSCG00000024385	RNASEH2B	GL892680.2:141112-183493	23.8875	12.7283	0.908219	5e-05	0.00318682	ribonuclease H2 subunit B [Source:RefSeq peptide;Acc:NP_001231421]	GO:0006950,GO:0080134,GO:0007049,GO:0048146,GO:0048144,GO:0048145,GO:0032299,GO:0051726,GO:1901990,GO:0004523,GO:0048523,GO:0043231,GO:0006974,GO:0044772,GO:0005634,GO:1901987,GO:0043229,GO:0048519,GO:2000001,GO:0022402,GO:2001020,GO:1901976,GO:0006401,GO:0044770,GO:0010389,GO:0016891,GO:0048583,GO:0034655,GO:0016893,GO:0009117,GO:0006753,GO:0044248,GO:0000086,GO:0044270,GO:0046700,GO:0019637,GO:…	response to stress,regulation of response to stress,cell cycle,positive regulation of fibroblast proliferation,fibroblast proliferation,regulation of fibroblast proliferation,ribonuclease H2 complex,regulation of cell cycle,regulation of mitotic cell cycle phase transition,ribonuclease H activity,negative regulation of cellular process,intracellular membrane-bounded organelle,response to DNA dama…	ssc03030	DNA replication
ENSSSCT00000007969	ENSSSCG00000007284	NCOA6	chr17:43309803-43393835	2.85531	2.07652	0.459485	0.0075	0.154701	nuclear receptor coactivator 6 [Source:HGNC Symbol;Acc:HGNC:15936]	--	--	--	--
ENSSSCT00000007960	ENSSSCG00000007275	RALY	chr17:42870965-42965773	43.2353	53.9309	-0.318903	0.02195	0.293304	RALY heterogeneous nuclear ribonucleoprotein [Source:HGNC Symbol;Acc:HGNC:15921]	--	--	--	--
ENSSSCT00000007966	ENSSSCG00000007281	MAP1LC3A	chr17:43155400-43157544	7.2659	10.0799	-0.472265	0.0113	0.197931	microtubule associated protein 1 light chain 3 alpha [Source:HGNC Symbol;Acc:HGNC:6838]	--	--	--	--
ENSSSCT00000004309	ENSSSCG00000003895	EFCAB14	chr6:152304699-152363910	31.1061	24.9363	0.31895	0.02375	0.30447	EF-hand calcium binding domain 14 [Source:HGNC Symbol;Acc:HGNC:29051]	--	--	--	--
ENSSSCT00000030446	ENSSSCG00000026582	SEPHS1	GL894068.1:685-17751	9.13988	11.483	-0.32925	0.0352	0.378158	selenophosphate synthetase 1 [Source:HGNC Symbol;Acc:HGNC:19685]	GO:0005737,GO:0044424,GO:0005622,GO:0043227,GO:0005515,GO:0043226,GO:0043231,GO:0044446,GO:0043229,GO:0044422,GO:0046982,GO:0097159,GO:1901363,GO:0005488,GO:0044428,GO:0005575,GO:0005634,GO:0046983,GO:0000166,GO:1901265,GO:0031967,GO:0031975,GO:0036094,GO:0042802,GO:0042803,GO:0005623,GO:0031965,GO:0044464,GO:0005524,GO:0031090,GO:0016020,GO:0035639,GO:0001883,GO:0032550,GO:0032559,GO:0001882,GO:…	cytoplasm,intracellular part,intracellular,membrane-bounded organelle,protein binding,organelle,intracellular membrane-bounded organelle,intracellular organelle part,intracellular organelle,organelle part,protein heterodimerization activity,organic cyclic compound binding,heterocyclic compound binding,binding,nuclear part,cellular_component,nucleus,protein dimerization activity,nucleotide binding…	ssc00450,ssc01100	Selenocompound metabolism,Metabolic pathways
ENSSSCT00000030447	ENSSSCG00000023324	KMT2A	chr9:50880741-50910465	5.12256	3.31838	0.626383	0.0001	0.00583627	lysine (K)-specific methyltransferase 2A [Source:HGNC Symbol;Acc:HGNC:7132]	--	--	ssc00310,ssc05202	Lysine degradation,Transcriptional misregulation in cancer
ENSSSCT00000024538	ENSSSCG00000029359	PHLDA3	chr10:28233387-28235940	10.641	13.9001	-0.385461	0.0362	0.383745	pleckstrin homology-like domain, family A, member 3 [Source:HGNC Symbol;Acc:HGNC:8934]	--	--	--	--
ENSSSCT00000033729	ENSSSCG00000009002	TLR2	chr8:79824540-79834592	109.387	83.3915	0.391474	0.01475	0.23392	toll-like receptor 2 [Source:HGNC Symbol;Acc:HGNC:11848]	GO:0002376,GO:0051707,GO:0009607,GO:0006950,GO:0051704,GO:0002682,GO:0044424,GO:0005737,GO:0006955,GO:0006952,GO:0045087,GO:0005515,GO:0003674,GO:0043226,GO:0005622,GO:0080134,GO:0046983,GO:0043227,GO:0043229,GO:0010033,GO:0009986,GO:0031347,GO:0032101,GO:0002684,GO:0008152,GO:0046982,GO:0033365,GO:0043231,GO:0043235,GO:0044237,GO:0071704,GO:0048518,GO:0006605,GO:0009611,GO:0001530,GO:0044238,GO:…	immune system process,response to other organism,response to biotic stimulus,response to stress,multi-organism process,regulation of immune system process,intracellular part,cytoplasm,immune response,defense response,innate immune response,protein binding,molecular_function,organelle,intracellular,regulation of response to stress,protein dimerization activity,membrane-bounded organelle,intracellu…	ssc05168,ssc05162,ssc04145,ssc05152,ssc04620,ssc05323,ssc05161,ssc05140,ssc05144,ssc05205,ssc05321,ssc05145,ssc05142,ssc04151,ssc05146,ssc05134	Herpes simplex infection,Measles,Phagosome,Tuberculosis,Toll-like receptor signaling pathway,Rheumatoid arthritis,Hepatitis B,Leishmaniasis,Malaria,Proteoglycans in cancer,Inflammatory bowel disease (IBD),Toxoplasmosis,Chagas disease (American trypanosomiasis),PI3K-Akt signaling pathway,Amoebiasis,Legionellosis
ENSSSCT00000026585	ENSSSCG00000023814	FAIM	chr13:87082122-87091700	28.0855	35.1929	-0.325458	0.038	0.393309	Fas apoptotic inhibitory molecule [Source:HGNC Symbol;Acc:HGNC:18703]	--	--	--	--
ENSSSCT00000026588	ENSSSCG00000023142	GAMT	chr2:77968840-77972112	3.55207	5.20846	-0.552197	0.0212	0.288733	guanidinoacetate N-methyltransferase [Source:HGNC Symbol;Acc:HGNC:4136]	--	--	ssc00260,ssc00330,ssc01100	Glycine, serine and threonine metabolism,Arginine and proline metabolism,Metabolic pathways
ENSSSCT00000028632	ENSSSCG00000030582	BATF	chr7:104503136-104524774	6.95683	9.71486	-0.481763	0.019	0.270834	basic leucine zipper transcription factor, ATF-like [Source:HGNC Symbol;Acc:HGNC:958]	--	--	--	--
ENSSSCT00000027183	ENSSSCG00000026100	-	chr3:91877090-91892620	0.882185	3.61876	-2.03634	5e-05	0.00318682	--	--	--	ssc00620	Pyruvate metabolism
ENSSSCT00000008828	ENSSSCG00000008056	ATP6V0C	chr3:42700753-42706839	183.84	143.818	0.354204	0.0105	0.18886	ATPase, H+ transporting, lysosomal 16kDa, V0 subunit c [Source:HGNC Symbol;Acc:HGNC:855]	--	--	ssc05152,ssc05323,ssc04145,ssc00190,ssc04966,ssc04721,ssc04142,ssc01100	Tuberculosis,Rheumatoid arthritis,Phagosome,Oxidative phosphorylation,Collecting duct acid secretion,Synaptic vesicle cycle,Lysosome,Metabolic pathways
ENSSSCT00000005812	ENSSSCG00000005277	GCNT1	chr1:256219661-256220948	19.0103	26.5279	-0.48073	0.00215	0.0654264	glucosaminyl (N-acetyl) transferase 1, core 2 [Source:HGNC Symbol;Acc:HGNC:4203]	GO:0002376,GO:0016477,GO:0048870,GO:0051674,GO:0044424,GO:0050900,GO:0006928,GO:0005622,GO:0043231,GO:0043229,GO:0043227,GO:0040011,GO:0005515,GO:0048513,GO:0009888,GO:0043226,GO:0005737,GO:0009058,GO:1901576,GO:0044249,GO:0034645,GO:0048729,GO:0044444,GO:0009059,GO:0005575,GO:0043170,GO:0044260,GO:0007159,GO:0044446,GO:0072001,GO:0005488,GO:0005795,GO:0001822,GO:0044422,GO:0071704,GO:0009887,GO:…	immune system process,cell migration,cell motility,localization of cell,intracellular part,leukocyte migration,cellular component movement,intracellular,intracellular membrane-bounded organelle,intracellular organelle,membrane-bounded organelle,locomotion,protein binding,organ development,tissue development,organelle,cytoplasm,biosynthetic process,organic substance biosynthetic process,cellular b…	ssc00512,ssc01100	Mucin type O-Glycan biosynthesis,Metabolic pathways
ENSSSCT00000012556	ENSSSCG00000011474	PXK	chr13:44039515-44120693	19.8096	15.8839	0.318633	0.0272	0.328603	PX domain containing serine/threonine kinase [Source:HGNC Symbol;Acc:HGNC:23326]	--	--	--	--
ENSSSCT00000017707	ENSSSCG00000016262	SP140	chr15:144854820-144973706	87.6763	39.8506	1.13758	5e-05	0.00318682	SP140 nuclear body protein [Source:HGNC Symbol;Acc:HGNC:17133]	--	--	--	--
ENSSSCT00000017708	ENSSSCG00000016263	-	chr15:144981351-145019301	58.6267	45.3053	0.371877	0.0107	0.191159	--	--	--	ssc05168,ssc05203	Herpes simplex infection,Viral carcinogenesis
ENSSSCT00000010955	ENSSSCG00000009998	GATSL3	chr14:50300847-50305714	5.67832	7.42447	-0.386824	0.03885	0.397719	GATS protein-like 3 [Source:HGNC Symbol;Acc:HGNC:34423]	GO:0005515,GO:0005488,GO:0003674	protein binding,binding,molecular_function	--	--
ENSSSCT00000014249	ENSSSCG00000013036	FKBP2	chr2:6935188-6936674	58.1616	87.0218	-0.581308	0.00125	0.0437374	FK506 binding protein 2 [Source:HGNC Symbol;Acc:HGNC:3718]	--	--	--	--
ENSSSCT00000014241	ENSSSCG00000013028	ESRRA	chr2:6867950-6878759	21.4129	29.4294	-0.458777	0.01405	0.226958	estrogen-related receptor alpha [Source:HGNC Symbol;Acc:HGNC:3471]	--	--	--	--
ENSSSCT00000014243	ENSSSCG00000013030	PRDX5	chr2:6864026-6867851	66.8584	99.1868	-0.56904	5e-05	0.00318682	peroxiredoxin 5 [Source:HGNC Symbol;Acc:HGNC:9355]	--	--	ssc04146	Peroxisome
ENSSSCT00000014246	ENSSSCG00000013033	BAD	chr2:6897944-6909698	36.8922	51.1869	-0.472457	0.00495	0.11675	BCL2 associated agonist of cell death [Source:HGNC Symbol;Acc:HGNC:936]	GO:0002376,GO:0009615,GO:0051707,GO:0009607,GO:0006950,GO:0002520,GO:0051704,GO:0002682,GO:0043903,GO:0030097,GO:0044424,GO:0005737,GO:0043900,GO:0048534,GO:0005515,GO:0042110,GO:0010638,GO:0044446,GO:0003674,GO:0046649,GO:0044403,GO:0044419,GO:0016032,GO:0044764,GO:0001775,GO:0044422,GO:0043226,GO:0034097,GO:0005622,GO:0046983,GO:0043227,GO:0043229,GO:0050863,GO:0051130,GO:0008284,GO:0010033,GO:…	immune system process,response to virus,response to other organism,response to biotic stimulus,response to stress,immune system development,multi-organism process,regulation of immune system process,regulation of symbiosis, encompassing mutualism through parasitism,hemopoiesis,intracellular part,cytoplasm,regulation of multi-organism process,hematopoietic or lymphoid organ development,protein bin…	ssc05210,ssc05160,ssc05152,ssc05213,ssc05010,ssc05203,ssc05161,ssc05200,ssc05221,ssc05212,ssc05215,ssc05220,ssc04210,ssc04919,ssc05145,ssc05014,ssc04722,ssc04151,ssc05223,ssc04910,ssc05218,ssc04012,ssc04014,ssc04022,ssc04370,ssc04510,ssc04024	Colorectal cancer,Hepatitis C,Tuberculosis,Endometrial cancer,Alzheimer's disease,Viral carcinogenesis,Hepatitis B,Pathways in cancer,Acute myeloid leukemia,Pancreatic cancer,Prostate cancer,Chronic myeloid leukemia,Apoptosis,Thyroid hormone signaling pathway,Toxoplasmosis,Amyotrophic lateral sclerosis (ALS),Neurotrophin signaling pathway,PI3K-Akt signaling pathway,Non-small cell lung cancer,Insu…
ENSSSCT00000011395	ENSSSCG00000010411	-	chr14:99566736-99612051	12.9444	19.5004	-0.591178	0.0002	0.0104635	--	--	--	--	--
ENSSSCT00000015676	ENSSSCG00000014348	SPATA24	chr2:147117506-147123827	0.677931	1.38888	-1.03472	0.00475	0.11349	spermatogenesis associated 24 [Source:HGNC Symbol;Acc:HGNC:27322]	--	--	--	--
ENSSSCT00000015677	ENSSSCG00000014349	TMEM173	chr2:147169468-147177252	19.4004	14.8804	0.382674	0.0247	0.311131	transmembrane protein 173 [Source:HGNC Symbol;Acc:HGNC:27962]	--	--	ssc04623,ssc04622	Cytosolic DNA-sensing pathway,RIG-I-like receptor signaling pathway
ENSSSCT00000009460	ENSSSCG00000008647	CMPK2	chr3:137688567-137704282	46.9401	3.66772	3.67787	0.0357	0.380972	cytidine monophosphate (UMP-CMP) kinase 2, mitochondrial [Source:HGNC Symbol;Acc:HGNC:27015]	GO:0051707,GO:0009607,GO:0051704,GO:0010033,GO:0071310,GO:0070887,GO:0042221,GO:0071396,GO:0005829,GO:0005622,GO:0009132,GO:0044424,GO:0004798,GO:0006227,GO:0006233,GO:0006235,GO:0009138,GO:0009139,GO:0009186,GO:0009189,GO:0009196,GO:0009197,GO:0009202,GO:0009211,GO:0009212,GO:0033862,GO:0046072,GO:0046075,GO:0046077,GO:0005737,GO:0071222,GO:0050896,GO:0033993,GO:0009219,GO:0009221,GO:0009263,GO:…	response to other organism,response to biotic stimulus,multi-organism process,response to organic substance,cellular response to organic substance,cellular response to chemical stimulus,response to chemical stimulus,cellular response to lipid,cytosol,intracellular,nucleoside diphosphate metabolic process,intracellular part,thymidylate kinase activity,dUDP biosynthetic process,dTDP biosynthetic pr…	ssc00240,ssc01100	Pyrimidine metabolism,Metabolic pathways
ENSSSCT00000009461	ENSSSCG00000008648	RSAD2	chr3:137667911-137683557	884.98	29.5063	4.90655	5e-05	0.00318682	radical S-adenosyl methionine domain containing 2 [Source:HGNC Symbol;Acc:HGNC:30908]	GO:0009615,GO:0051607,GO:0002252,GO:0048525,GO:0051707,GO:0009607,GO:0045071,GO:0043901,GO:0045087,GO:0051704,GO:0006952,GO:0045069,GO:0050792,GO:0019079,GO:0043903,GO:0019058,GO:0043900,GO:0006950,GO:0016032,GO:0044764,GO:0006955,GO:0044403,GO:0044419,GO:0002376,GO:0031347,GO:0080134,GO:0002697,GO:0031967,GO:0031975,GO:0005622,GO:0001817,GO:0050709,GO:0002682,GO:0002224,GO:0044424,GO:0034154,GO:…	response to virus,defense response to virus,immune effector process,negative regulation of viral process,response to other organism,response to biotic stimulus,negative regulation of viral genome replication,negative regulation of multi-organism process,innate immune response,multi-organism process,defense response,regulation of viral genome replication,regulation of viral process,viral genome re…	ssc05164	Influenza A
ENSSSCT00000003327	ENSSSCG00000002995	-	chr6:44685811-44694279	32.9604	41.6624	-0.338012	0.0191	0.271718	--	--	--	ssc05211,ssc04066,ssc05200	Renal cell carcinoma,HIF-1 signaling pathway,Pathways in cancer
ENSSSCT00000012317	ENSSSCG00000011250	-	chr13:25168718-25179429	32.3063	42.9172	-0.409741	0.00515	0.120066	--	--	--	ssc01212,ssc00280,ssc00071,ssc04146,ssc00592,ssc01040,ssc01100,ssc03320	Fatty acid metabolism,Valine, leucine and isoleucine degradation,Fatty acid degradation,Peroxisome,alpha-Linolenic acid metabolism,Biosynthesis of unsaturated fatty acids,Metabolic pathways,PPAR signaling pathway
ENSSSCT00000000006	ENSSSCG00000000005	-	chr5:496539-504125	4.50877	6.91204	-0.616377	0.01075	0.191751	--	--	--	--	--
ENSSSCT00000000913	ENSSSCG00000000839	ALDH1L2	chr5:82894881-82958376	16.5856	9.15712	0.856964	5e-05	0.00318682	aldehyde dehydrogenase 1 family member L2 [Source:HGNC Symbol;Acc:HGNC:26777]	--	--	ssc00670	One carbon pool by folate
ENSSSCT00000000914	ENSSSCG00000000840	KIAA1033	chr5:82604178-82645895	75.9313	56.2249	0.433486	0.002	0.0620239	KIAA1033 [Source:HGNC Symbol;Acc:HGNC:29174]	--	--	--	--
ENSSSCT00000027346	ENSSSCG00000021065	NAA60	chr3:40195726-40199606	10.5112	6.68886	0.652099	0.0283	0.336002	N(alpha)-acetyltransferase 60, NatF catalytic subunit [Source:HGNC Symbol;Acc:HGNC:25875]	--	--	--	--
ENSSSCT00000006421	ENSSSCG00000005842	TMEM141	chr1:313876994-313878962	15.473	20.5432	-0.408904	0.0278	0.332602	transmembrane protein 141 [Source:HGNC Symbol;Acc:HGNC:28211]	--	--	--	--
ENSSSCT00000006424	ENSSSCG00000005845	TOR4A	chr1:314112196-314114510	29.3527	36.5779	-0.317477	0.0304	0.349728	torsin family 4, member A [Source:HGNC Symbol;Acc:HGNC:25981]	--	--	--	--
ENSSSCT00000033106	ENSSSCG00000030898	MAFB	chr17:48698398-48701183	191.648	117.868	0.701284	5e-05	0.00318682	v-maf avian musculoaponeurotic fibrosarcoma oncogene homolog B [Source:HGNC Symbol;Acc:HGNC:6408]	--	--	--	--
ENSSSCT00000033100	ENSSSCG00000006127	NBN	chr4:51264094-51283502	38.5584	28.7668	0.422639	0.0128	0.214117	nibrin [Source:HGNC Symbol;Acc:HGNC:7652]	GO:0002252,GO:0002376,GO:0006955,GO:0006950,GO:0007093,GO:0000075,GO:0005515,GO:0010948,GO:0051726,GO:1901988,GO:1901991,GO:1901990,GO:0005622,GO:0043226,GO:0048523,GO:0002520,GO:0043227,GO:0044772,GO:0044424,GO:0010564,GO:0048519,GO:0006302,GO:1901987,GO:0005634,GO:0006974,GO:0006281,GO:0007346,GO:0043229,GO:0005654,GO:0044770,GO:0043231,GO:0007049,GO:0044428,GO:0000077,GO:0031974,GO:0046649,GO:…	immune effector process,immune system process,immune response,response to stress,mitotic cell cycle checkpoint,cell cycle checkpoint,protein binding,negative regulation of cell cycle process,regulation of cell cycle,negative regulation of cell cycle phase transition,negative regulation of mitotic cell cycle phase transition,regulation of mitotic cell cycle phase transition,intracellular,organelle…	ssc03440	Homologous recombination
ENSSSCT00000018037	ENSSSCG00000016567	STRIP2	chr18:20279717-20326503	2.84545	4.06627	-0.515046	0.00255	0.0741254	striatin interacting protein 2 [Source:HGNC Symbol;Acc:HGNC:22209]	GO:0005737,GO:0044424,GO:0005622,GO:0006928,GO:0022603,GO:0050793,GO:0032502,GO:0016477,GO:0048870,GO:0051674,GO:0005575,GO:0048869,GO:0040011,GO:0065008,GO:0044767,GO:0048856,GO:0009653,GO:0005623,GO:0006996,GO:0032989,GO:0044464,GO:0051128,GO:0016043,GO:0022604,GO:0071840,GO:0008360,GO:0000902,GO:0051179,GO:0050789,GO:0009987,GO:0007010,GO:0065007,GO:0050794,GO:0044763,GO:0008150,GO:0044699	cytoplasm,intracellular part,intracellular,cellular component movement,regulation of anatomical structure morphogenesis,regulation of developmental process,developmental process,cell migration,cell motility,localization of cell,cellular_component,cellular developmental process,locomotion,regulation of biological quality,single-organism developmental process,anatomical structure development,anatom…	--	--
ENSSSCT00000018038	ENSSSCG00000016568	AHCYL2	chr18:20333817-20511321	1.68864	2.61541	-0.631177	0.0087	0.169029	adenosylhomocysteinase-like 2 [Source:HGNC Symbol;Acc:HGNC:22204]	GO:0044424,GO:0005622,GO:0005737,GO:0043231,GO:0043229,GO:0043226,GO:0043227,GO:0097159,GO:0005515,GO:1901363,GO:0005829,GO:0044237,GO:0005488,GO:0004013,GO:0016801,GO:0016802,GO:0033353,GO:0005623,GO:0036094,GO:0044238,GO:0034641,GO:0006139,GO:0044464,GO:0005575,GO:0009987,GO:0008152,GO:1901360,GO:0046483,GO:0046500,GO:0006725,GO:0000166,GO:1901265,GO:0006807,GO:0042995,GO:0071704,GO:0055086,GO:…	intracellular part,intracellular,cytoplasm,intracellular membrane-bounded organelle,intracellular organelle,organelle,membrane-bounded organelle,organic cyclic compound binding,protein binding,heterocyclic compound binding,cytosol,cellular metabolic process,binding,adenosylhomocysteinase activity,hydrolase activity, acting on ether bonds,trialkylsulfonium hydrolase activity,S-adenosylmethionine c…	ssc00270,ssc01100	Cysteine and methionine metabolism,Metabolic pathways
ENSSSCT00000034652	ENSSSCG00000027607	IER3	chr7:26987520-26988891	136.279	206.888	-0.602283	5e-05	0.00318682	immediate early response 3 [Source:HGNC Symbol;Acc:HGNC:5392]	--	--	--	--
ENSSSCT00000022707	ENSSSCG00000025167	-	JH118787.1:77049-80982	239.661	197.67	0.277903	0.0397	0.402328	--	--	--	--	--
ENSSSCT00000022702	ENSSSCG00000026744	ZDHHC20	chr11:458932-515720	65.3161	80.7666	-0.30632	0.0265	0.323963	zinc finger, DHHC-type containing 20 [Source:HGNC Symbol;Acc:HGNC:20749]	--	--	--	--
ENSSSCT00000029950	ENSSSCG00000022942	PHF6	GL895293.1:77477-95569	9.18985	6.7463	0.445945	0.00495	0.11675	PHD finger protein 6 [Source:HGNC Symbol;Acc:HGNC:18145]	GO:0044428,GO:0044424,GO:0005654,GO:0031981,GO:0005622,GO:0070013,GO:0043233,GO:0031974,GO:0005634,GO:0044446,GO:0043231,GO:0043229,GO:0044422,GO:0043226,GO:0043227,GO:0005730,GO:0019899,GO:0043228,GO:0043232,GO:0005515,GO:0005488,GO:0005623,GO:0042393,GO:0044464,GO:0005575,GO:0043021,GO:0051219,GO:0097110,GO:0042826,GO:0003674,GO:0043167,GO:0008270,GO:0046914,GO:0008092,GO:0046872,GO:0015631,GO:…	nuclear part,intracellular part,nucleoplasm,nuclear lumen,intracellular,intracellular organelle lumen,organelle lumen,membrane-enclosed lumen,nucleus,intracellular organelle part,intracellular membrane-bounded organelle,intracellular organelle,organelle part,organelle,membrane-bounded organelle,nucleolus,enzyme binding,non-membrane-bounded organelle,intracellular non-membrane-bounded organelle,pr…	--	--
ENSSSCT00000033970	ENSSSCG00000030900	LDLR	chr2:70193417-70206818	26.072	15.1597	0.782254	5e-05	0.00318682	low-density lipoprotein receptor precursor [Source:RefSeq peptide;Acc:NP_001193283]	--	--	ssc05160,ssc04144,ssc05145,ssc04976,ssc04913	Hepatitis C,Endocytosis,Toxoplasmosis,Bile secretion,Ovarian steroidogenesis
ENSSSCT00000018864	ENSSSCG00000017328	ARHGAP27	chr12:18206638-18311004	6.44179	5.1372	0.326477	0.04295	0.419369	Rho GTPase activating protein 27 [Source:HGNC Symbol;Acc:HGNC:31813]	--	--	--	--
ENSSSCT00000028391	ENSSSCG00000027745	ABCG1	chr13:215898401-215958339	18.3159	14.5493	0.332152	0.0315	0.356547	ATP binding cassette subfamily G member 1 [Source:HGNC Symbol;Acc:HGNC:73]	GO:0010033,GO:0065008,GO:0042592,GO:0048518,GO:0044424,GO:0010468,GO:0005622,GO:0010467,GO:0043231,GO:0043229,GO:0043227,GO:0051649,GO:0008202,GO:0090181,GO:0005515,GO:0033993,GO:0009897,GO:0043226,GO:0005737,GO:2000112,GO:0032879,GO:0051641,GO:0010556,GO:0046982,GO:0060255,GO:0009058,GO:1901576,GO:0045834,GO:0044249,GO:0034645,GO:0005634,GO:0046983,GO:0010875,GO:0032373,GO:0032376,GO:0090304,GO:…	response to organic substance,regulation of biological quality,homeostatic process,positive regulation of biological process,intracellular part,regulation of gene expression,intracellular,gene expression,intracellular membrane-bounded organelle,intracellular organelle,membrane-bounded organelle,establishment of localization in cell,steroid metabolic process,regulation of cholesterol metabolic pro…	ssc02010	ABC transporters
ENSSSCT00000028396	ENSSSCG00000024333	-	GL896282.2:2202-27979	47.966	7.17021	2.74193	5e-05	0.00318682	--	GO:0005622,GO:0043226,GO:0043227,GO:0044424,GO:0005634,GO:0043229,GO:0043231,GO:0005488,GO:0044464,GO:0005623,GO:0008270,GO:1901360,GO:0046483,GO:0006139,GO:0046914,GO:0003674,GO:0034641,GO:0006725,GO:0006807,GO:0090304,GO:0005575,GO:0044237,GO:0008150,GO:1901362,GO:0016070,GO:0019222,GO:0044260,GO:0018130,GO:0008152,GO:0044238,GO:0043170,GO:0043169,GO:0010467,GO:0046872,GO:0034654,GO:0006351,GO:…	intracellular,organelle,membrane-bounded organelle,intracellular part,nucleus,intracellular organelle,intracellular membrane-bounded organelle,binding,cell part,cell,zinc ion binding,organic cyclic compound metabolic process,heterocycle metabolic process,nucleobase-containing compound metabolic process,transition metal ion binding,molecular_function,cellular nitrogen compound metabolic process,ce…	--	--
ENSSSCT00000018956	ENSSSCG00000017414	KAT2A	chr12:20928723-20937631	6.6087	4.38237	0.592655	0.00065	0.026683	K(lysine) acetyltransferase 2A [Source:HGNC Symbol;Acc:HGNC:4201]	--	--	ssc04330,ssc05203,ssc05166,ssc04919	Notch signaling pathway,Viral carcinogenesis,HTLV-I infection,Thyroid hormone signaling pathway
ENSSSCT00000017518	ENSSSCG00000016090	SPATS2L	chr15:115266548-115332003	11.0779	7.57738	0.547914	0.00165	0.0537245	spermatogenesis associated, serine rich 2 like [Source:HGNC Symbol;Acc:HGNC:24574]	GO:0005737,GO:0044424,GO:0005622,GO:0005515,GO:0005488,GO:0005575,GO:0032991,GO:0005623,GO:0044464,GO:0003674,GO:0043234	cytoplasm,intracellular part,intracellular,protein binding,binding,cellular_component,macromolecular complex,cell,cell part,molecular_function,protein complex	--	--
ENSSSCT00000036320	ENSSSCG00000011393	UBA7	chr13:35509776-35520887	51.1632	10.0765	2.34412	5e-05	0.00318682	ubiquitin-like modifier activating enzyme 7 [Source:HGNC Symbol;Acc:HGNC:12471]	--	--	ssc04120,ssc05012	Ubiquitin mediated proteolysis,Parkinson's disease
ENSSSCT00000032534	ENSSSCG00000021815	IL15RA	chr10:71094381-71108500	8.79632	6.03035	0.544658	0.00535	0.123235	interleukin 15 receptor subunit alpha [Source:HGNC Symbol;Acc:HGNC:5978]	--	--	ssc04060,ssc05166,ssc04630,ssc04672	Cytokine-cytokine receptor interaction,HTLV-I infection,Jak-STAT signaling pathway,Intestinal immune network for IgA production
ENSSSCT00000013505	ENSSSCG00000012350	MAGEH1	chrX:54057687-54059104	0.528425	1.03319	-0.96733	0.0071	0.149368	MAGE family member H1 [Source:HGNC Symbol;Acc:HGNC:24092]	GO:0005515,GO:0005488,GO:0005575,GO:0016020,GO:0003674,GO:0044425,GO:0016021,GO:0031224	protein binding,binding,cellular_component,membrane,molecular_function,membrane part,integral to membrane,intrinsic to membrane	--	--
ENSSSCT00000000669	ENSSSCG00000000623	BCL2L14	chr5:63690798-63713753	14.9506	4.67737	1.67643	5e-05	0.00318682	BCL2-like 14 (apoptosis facilitator) [Source:HGNC Symbol;Acc:HGNC:16657]	GO:0005515,GO:0005622,GO:0043226,GO:0044424,GO:0005829,GO:0005737,GO:0043229,GO:0005488,GO:2001238,GO:0044464,GO:0005623,GO:0048522,GO:0008219,GO:0016265,GO:0006915,GO:0012501,GO:0010941,GO:0048518,GO:0019899,GO:0042981,GO:0043067,GO:2001235,GO:0003674,GO:0044444,GO:0044699,GO:2001236,GO:0097190,GO:0005575,GO:0050896,GO:0008150,GO:0009967,GO:0048584,GO:0097191,GO:0023056,GO:0010647,GO:0048583,GO:…	protein binding,intracellular,organelle,intracellular part,cytosol,cytoplasm,intracellular organelle,binding,positive regulation of extrinsic apoptotic signaling pathway,cell part,cell,positive regulation of cellular process,cell death,death,apoptotic process,programmed cell death,regulation of cell death,positive regulation of biological process,enzyme binding,regulation of apoptotic process,reg…	--	--
ENSSSCT00000003482	ENSSSCG00000003140	FGF21	chr6:49830007-49831887	1.3364	0.187205	2.83566	0.00825	0.163607	fibroblast growth factor 21 [Source:HGNC Symbol;Acc:HGNC:3678]	--	--	ssc05200,ssc04014,ssc04810,ssc04015,ssc05218,ssc04151,ssc04010	Pathways in cancer,Ras signaling pathway,Regulation of actin cytoskeleton,Rap1 signaling pathway,Melanoma,PI3K-Akt signaling pathway,MAPK signaling pathway
ENSSSCT00000003483	ENSSSCG00000003141	FUT1	chr6:49824782-49827868	14.0948	10.2312	0.462191	0.00395	0.0996978	fucosyltransferase 1 (H blood group) [Source:HGNC Symbol;Acc:HGNC:4012]	--	--	ssc00603,ssc00601,ssc01100	Glycosphingolipid biosynthesis - globo series,Glycosphingolipid biosynthesis - lacto and neolacto series,Metabolic pathways
ENSSSCT00000006505	ENSSSCG00000005925	EXOSC4	chr4:828883-831320	11.2394	14.9636	-0.412887	0.01705	0.255385	exosome component 4 [Source:HGNC Symbol;Acc:HGNC:18189]	--	--	ssc03018	RNA degradation
ENSSSCT00000006506	ENSSSCG00000005926	PARP10	chr4:790064-797030	18.7639	13.9467	0.428033	0.00345	0.0913494	poly(ADP-ribose) polymerase family member 10 [Source:HGNC Symbol;Acc:HGNC:25895]	--	--	--	--
ENSSSCT00000000598	ENSSSCG00000000555	-	chr5:50595617-51021177	20.541	15.45	0.410898	0.0033	0.088885	--	--	--	ssc05205,ssc04611,ssc05010,ssc04912,ssc04720,ssc04070,ssc04750,ssc04921,ssc04540,ssc04970,ssc04114,ssc04972,ssc04728,ssc04725,ssc04270,ssc04971,ssc04915,ssc04713,ssc04022,ssc04730,ssc04742,ssc04911,ssc04724,ssc04723,ssc04918,ssc04726,ssc04020	Proteoglycans in cancer,Platelet activation,Alzheimer's disease,GnRH signaling pathway,Long-term potentiation,Phosphatidylinositol signaling system,Inflammatory mediator regulation of TRP channels,Oxytocin signaling pathway,Gap junction,Salivary secretion,Oocyte meiosis,Pancreatic secretion,Dopaminergic synapse,Cholinergic synapse,Vascular smooth muscle contraction,Gastric acid secretion,Estrogen…
ENSSSCT00000007675	ENSSSCG00000007007	IDO1	chr17:10806298-10928870	199.323	107.084	0.896364	5e-05	0.00318682	indoleamine 2,3-dioxygenase 1 [Source:HGNC Symbol;Acc:HGNC:6059]	--	--	ssc05143,ssc00380,ssc01100	African trypanosomiasis,Tryptophan metabolism,Metabolic pathways
ENSSSCT00000017966	ENSSSCG00000016502	-	chr18:10181400-10223526	58.2713	18.9994	1.61683	5e-05	0.00318682	--	--	--	--	--
ENSSSCT00000034920	ENSSSCG00000007516	STX16	chr17:66106713-66134997	3.31032	5.26146	-0.668494	0.0181	0.263346	syntaxin 16 [Source:HGNC Symbol;Acc:HGNC:11431]	--	--	ssc04130	SNARE interactions in vesicular transport
ENSSSCT00000001143	ENSSSCG00000001049	HIVEP1	chr7:8920529-9065107	1.40749	1.06181	0.406601	0.02165	0.292175	human immunodeficiency virus type I enhancer binding protein 1 [Source:HGNC Symbol;Acc:HGNC:4920]	--	--	--	--
ENSSSCT00000001144	ENSSSCG00000001050	EDN1	chr7:9152652-9159251	24.0054	16.6965	0.523811	0.001	0.0369787	endothelin 1 [Source:HGNC Symbol;Acc:HGNC:3176]	GO:0005829,GO:0005737,GO:0006950,GO:0044424,GO:0005622,GO:0005515,GO:0048514,GO:0080134,GO:0044283,GO:0044711,GO:0051216,GO:0048646,GO:0003300,GO:0016053,GO:0046394,GO:0032787,GO:0006928,GO:0009058,GO:0022603,GO:0071704,GO:0001516,GO:0006692,GO:0006693,GO:0046457,GO:0010467,GO:0044444,GO:0051130,GO:0044237,GO:0032268,GO:0001944,GO:1901576,GO:0051641,GO:0001525,GO:0044249,GO:0010869,GO:0032800,GO:…	cytosol,cytoplasm,response to stress,intracellular part,intracellular,protein binding,blood vessel morphogenesis,regulation of response to stress,small molecule biosynthetic process,single-organism biosynthetic process,cartilage development,anatomical structure formation involved in morphogenesis,cardiac muscle hypertrophy,organic acid biosynthetic process,carboxylic acid biosynthetic process,mon…	ssc04916,ssc04668,ssc04066	Melanogenesis,TNF signaling pathway,HIF-1 signaling pathway
ENSSSCT00000030979	ENSSSCG00000029592	GPRC5A	GL896435.1:4687-9401	1.50541	2.16145	-0.521839	0.0364	0.38472	G protein-coupled receptor, class C, group 5, member A [Source:HGNC Symbol;Acc:HGNC:9836]	GO:0044424,GO:0005515,GO:0003674,GO:0043226,GO:0005622,GO:0043227,GO:0043229,GO:0043231,GO:0044421,GO:0043230,GO:0065010,GO:0070062,GO:0005576,GO:0005488,GO:0031982,GO:0031988,GO:0050896,GO:0005575,GO:0005623,GO:0044464,GO:0009987,GO:0051716,GO:0007166,GO:0008150,GO:0050789,GO:0065007,GO:0050794,GO:0016020,GO:0044763,GO:0044699,GO:0007165,GO:0044700,GO:0023052,GO:0007154,GO:0044425,GO:0004871,GO:…	intracellular part,protein binding,molecular_function,organelle,intracellular,membrane-bounded organelle,intracellular organelle,intracellular membrane-bounded organelle,extracellular region part,extracellular organelle,extracellular membrane-bounded organelle,extracellular vesicular exosome,extracellular region,binding,vesicle,membrane-bounded vesicle,response to stimulus,cellular_component,cell…	--	--
ENSSSCT00000025359	ENSSSCG00000025104	-	chr12:6320505-6321529	91.1174	118.206	-0.375509	0.00865	0.168429	ATP synthase, H+ transporting, mitochondrial Fo complex, subunit d [Source:RefSeq peptide;Acc:NP_001231613]	--	--	ssc00190,ssc05016,ssc05010,ssc05012,ssc01100	Oxidative phosphorylation,Huntington's disease,Alzheimer's disease,Parkinson's disease,Metabolic pathways
ENSSSCT00000017999	ENSSSCG00000016531	C7orf49	chr18:14935739-14940095	6.72499	10.7365	-0.674926	0.0031	0.0850105	chromosome 7 open reading frame 49 [Source:HGNC Symbol;Acc:HGNC:22432]	GO:0005515,GO:0003674,GO:0005488	protein binding,molecular_function,binding	--	--
ENSSSCT00000017998	ENSSSCG00000016530	TMEM140	chr18:14940690-14955817	39.8743	28.8384	0.467467	0.00115	0.0410868	transmembrane protein 140 [Source:HGNC Symbol;Acc:HGNC:21870]	GO:0005515,GO:0005575,GO:0005488,GO:0016020,GO:0003674,GO:0044425,GO:0016021,GO:0031224	protein binding,cellular_component,binding,membrane,molecular_function,membrane part,integral to membrane,intrinsic to membrane	--	--
ENSSSCT00000032049	ENSSSCG00000024463	PJA1	chrX:62339855-62344587	1.57806	2.16384	-0.455442	0.0452	0.428876	praja ring finger 1, E3 ubiquitin protein ligase [Source:HGNC Symbol;Acc:HGNC:16648]	--	--	--	--
ENSSSCT00000012469	ENSSSCG00000011391	CDHR4	chr13:35501373-35508389	1.43829	0.490591	1.55177	5e-05	0.00318682	cadherin related family member 4 [Source:HGNC Symbol;Acc:HGNC:34527]	--	--	--	--
ENSSSCT00000005475	ENSSSCG00000004963	-	chr1:184592889-184634078	6.52963	9.53372	-0.546039	0.012	0.205628	--	GO:0044424,GO:0005622,GO:0043227,GO:0005515,GO:0043226,GO:0043231,GO:0044446,GO:0043229,GO:0044422,GO:0070013,GO:0043233,GO:0031974,GO:0005488,GO:0044428,GO:0031981,GO:0005575,GO:0005634,GO:0016363,GO:0034399,GO:0005623,GO:0044464,GO:0003674	intracellular part,intracellular,membrane-bounded organelle,protein binding,organelle,intracellular membrane-bounded organelle,intracellular organelle part,intracellular organelle,organelle part,intracellular organelle lumen,organelle lumen,membrane-enclosed lumen,binding,nuclear part,nuclear lumen,cellular_component,nucleus,nuclear matrix,nuclear periphery,cell,cell part,molecular_function	--	--
ENSSSCT00000015224	ENSSSCG00000013938	GATAD2A	chr2:58240860-58282261	12.3239	9.96565	0.30642	0.03075	0.351914	GATA zinc finger domain containing 2A [Source:HGNC Symbol;Acc:HGNC:29989]	--	--	--	--
ENSSSCT00000015787	ENSSSCG00000014441	-	chr2:157856238-157882290	97.9485	75.481	0.375909	0.00765	0.156516	--	GO:0005515,GO:0010033,GO:0071310,GO:0034097,GO:0071704,GO:0070887,GO:0071345,GO:0044237,GO:0097159,GO:1901363,GO:0005488,GO:0044238,GO:0005575,GO:0008152,GO:0044267,GO:0019538,GO:0043170,GO:0019199,GO:0000166,GO:1901265,GO:0044260,GO:0019221,GO:0036094,GO:0004713,GO:0019955,GO:0004714,GO:0006796,GO:0006464,GO:0036211,GO:0006793,GO:0007167,GO:0003824,GO:0005524,GO:0043412,GO:0006468,GO:0016020,GO:…	protein binding,response to organic substance,cellular response to organic substance,response to cytokine stimulus,organic substance metabolic process,cellular response to chemical stimulus,cellular response to cytokine stimulus,cellular metabolic process,organic cyclic compound binding,heterocyclic compound binding,binding,primary metabolic process,cellular_component,metabolic process,cellular p…	ssc04144,ssc04640,ssc04380,ssc04060,ssc04015,ssc05202,ssc05200,ssc04014,ssc04151	Endocytosis,Hematopoietic cell lineage,Osteoclast differentiation,Cytokine-cytokine receptor interaction,Rap1 signaling pathway,Transcriptional misregulation in cancer,Pathways in cancer,Ras signaling pathway,PI3K-Akt signaling pathway
ENSSSCT00000031166	ENSSSCG00000028912	-	chr13:23924270-23947082	32.5162	8.99816	1.85346	5e-05	0.00318682	--	--	--	--	--
ENSSSCT00000031162	ENSSSCG00000024095	-	chr8:146540274-146542690	8.60383	1.46878	2.55036	5e-05	0.00318682	--	--	--	--	--
ENSSSCT00000030349	ENSSSCG00000021590	RPL23	GL896426.1:60123-65158	1152.11	1444.85	-0.326638	0.0224	0.296893	60S ribosomal protein L23 [Source:UniProtKB/Swiss-Prot;Acc:P62831]	--	--	ssc03010	Ribosome
ENSSSCT00000035488	ENSSSCG00000012076	MX2	chr13:215028063-215059085	301.973	36.1282	3.06322	5e-05	0.00318682	MX dynamin-like GTPase 2 [Source:HGNC Symbol;Acc:HGNC:7533]	GO:0009615,GO:0051607,GO:0002252,GO:0051707,GO:0009607,GO:0051704,GO:0035455,GO:0006952,GO:0034097,GO:0010033,GO:0006950,GO:0002376,GO:0042221,GO:0005635,GO:0005525,GO:0031967,GO:0031975,GO:0019001,GO:0032561,GO:0005622,GO:0044424,GO:0007049,GO:0050896,GO:0043229,GO:1901363,GO:0043231,GO:0097159,GO:0006913,GO:0051169,GO:0005515,GO:0036094,GO:0008150,GO:0005634,GO:0044428,GO:0043226,GO:0012505,GO:…	response to virus,defense response to virus,immune effector process,response to other organism,response to biotic stimulus,multi-organism process,response to interferon-alpha,defense response,response to cytokine stimulus,response to organic substance,response to stress,immune system process,response to chemical stimulus,nuclear envelope,GTP binding,organelle envelope,envelope,guanyl nucleotide b…	--	--
ENSSSCT00000022357	ENSSSCG00000026872	TNFSF13	GL896258.1:1741-3865	39.8473	52.8509	-0.407445	0.00995	0.182499	a proliferation-inducing ligand [Source:RefSeq peptide;Acc:NP_001106160]	GO:0002252,GO:0002376,GO:0006955,GO:0002682,GO:0050896,GO:0002697,GO:0002520,GO:0005164,GO:0002819,GO:0005125,GO:0048583,GO:0002684,GO:0005737,GO:0002250,GO:0005126,GO:0032813,GO:0048731,GO:0050776,GO:0002366,GO:0007275,GO:0002263,GO:0002460,GO:0002822,GO:0002706,GO:0005615,GO:0045321,GO:0051239,GO:0044424,GO:0002700,GO:0048298,GO:0048856,GO:0050793,GO:0002703,GO:0032502,GO:0048518,GO:0005515,GO:…	immune effector process,immune system process,immune response,regulation of immune system process,response to stimulus,regulation of immune effector process,immune system development,tumor necrosis factor receptor binding,regulation of adaptive immune response,cytokine activity,regulation of response to stimulus,positive regulation of immune system process,cytoplasm,adaptive immune response,cytok…	ssc05323,ssc04060,ssc04672	Rheumatoid arthritis,Cytokine-cytokine receptor interaction,Intestinal immune network for IgA production
ENSSSCT00000002660	ENSSSCG00000002392	IRF2BPL	chr7:106151785-106154137	5.7729	7.5898	-0.394766	0.02235	0.296525	interferon regulatory factor 2 binding protein-like [Source:HGNC Symbol;Acc:HGNC:14282]	--	--	--	--
ENSSSCT00000023758	ENSSSCG00000028725	TMEM102	chr12:55011103-55013184	4.77502	6.27213	-0.393448	0.03375	0.370081	transmembrane protein 102 [Source:HGNC Symbol;Acc:HGNC:26722]	--	--	--	--
ENSSSCT00000026502	ENSSSCG00000028058	CCDC69	chr16:78027655-78054985	7.76365	9.63211	-0.311117	0.03655	0.385567	coiled-coil domain containing 69 [Source:HGNC Symbol;Acc:HGNC:24487]	--	--	--	--
ENSSSCT00000027450	ENSSSCG00000029642	RPL17	chr1:108447523-108451374	666.825	840.099	-0.333252	0.0195	0.27507	60S ribosomal protein L17 [Source:RefSeq peptide;Acc:NP_001231487]	--	--	ssc03010	Ribosome
ENSSSCT00000024901	ENSSSCG00000022789	-	chr13:183834655-183877970	66.9832	90.9613	-0.441455	0.00215	0.0654264	--	GO:0003674,GO:0016787,GO:0004553,GO:0003824,GO:0016798,GO:0008152,GO:0044238,GO:0071704,GO:0005975,GO:0008150	molecular_function,hydrolase activity,hydrolase activity, hydrolyzing O-glycosyl compounds,catalytic activity,hydrolase activity, acting on glycosyl bonds,metabolic process,primary metabolic process,organic substance metabolic process,carbohydrate metabolic process,biological_process	--	--
ENSSSCT00000011069	ENSSSCG00000010108	-	chr14:54169496-54205605	4.09195	5.68269	-0.473783	0.0095	0.177159	--	GO:0007093,GO:0000075,GO:0005515,GO:0010948,GO:0051726,GO:1901988,GO:1901991,GO:1901990,GO:0005622,GO:0043226,GO:0048523,GO:0045786,GO:0044772,GO:0044424,GO:0010564,GO:0048519,GO:1901987,GO:0005737,GO:0007346,GO:0043229,GO:0044770,GO:0007049,GO:0005488,GO:0022402,GO:0043228,GO:0043232,GO:0051129,GO:0010639,GO:0044446,GO:0044464,GO:0005623,GO:0044422,GO:0004842,GO:0000278,GO:0016567,GO:0019787,GO:…	mitotic cell cycle checkpoint,cell cycle checkpoint,protein binding,negative regulation of cell cycle process,regulation of cell cycle,negative regulation of cell cycle phase transition,negative regulation of mitotic cell cycle phase transition,regulation of mitotic cell cycle phase transition,intracellular,organelle,negative regulation of cellular process,negative regulation of cell cycle,mitoti…	--	--
ENSSSCT00000008178	ENSSSCG00000007473	ADNP	chr17:58757707-58790779	8.63699	4.24367	1.02522	0.0001	0.00583627	activity-dependent neuroprotector homeobox [Source:HGNC Symbol;Acc:HGNC:15766]	--	--	--	--
ENSSSCT00000032528	ENSSSCG00000026996	-	chr11:70152453-70201530	5.48587	7.64938	-0.479622	0.0043	0.105867	--	--	--	--	--
ENSSSCT00000014540	ENSSSCG00000013314	QSER1	chr2:30443548-30531265	8.71005	6.11547	0.510216	0.0004	0.0182909	glutamine and serine rich 1 [Source:HGNC Symbol;Acc:HGNC:26154]	--	--	--	--
ENSSSCT00000004260	ENSSSCG00000003848	LRP8	chr6:146567980-146649171	7.19668	4.24078	0.762999	5e-05	0.00318682	LDL receptor related protein 8 [Source:HGNC Symbol;Acc:HGNC:6700]	--	--	--	--
ENSSSCT00000011504	ENSSSCG00000010514	RRP12	chr14:118240907-118268516	6.49467	4.59579	0.498944	0.0029	0.0811362	ribosomal RNA processing 12 homolog [Source:HGNC Symbol;Acc:HGNC:29100]	--	--	--	--
ENSSSCT00000011501	ENSSSCG00000010511	LCOR	chr14:118037120-118045440	11.9947	9.14072	0.39202	0.0109	0.19347	ligand dependent nuclear receptor corepressor [Source:HGNC Symbol;Acc:HGNC:29503]	--	--	--	--
ENSSSCT00000011503	ENSSSCG00000010513	C10orf12	chr14:118065018-118068750	7.48355	5.69384	0.394319	0.01375	0.223945	chromosome 10 open reading frame 12 [Source:HGNC Symbol;Acc:HGNC:23420]	--	--	--	--
ENSSSCT00000015437	ENSSSCG00000014133	RPS23	chr2:92675094-92676828	1746.4	2142.03	-0.294598	0.043	0.419614	-	GO:0005737,GO:0044424,GO:0005622,GO:0043226,GO:0044446,GO:0043229,GO:0044391,GO:0006412,GO:0044422,GO:0003735,GO:0009058,GO:0030529,GO:0071704,GO:0010467,GO:0044444,GO:0044237,GO:1901576,GO:0044249,GO:0015935,GO:0005840,GO:0044238,GO:0005575,GO:0008152,GO:0044267,GO:0019538,GO:0043170,GO:0032991,GO:0044260,GO:0009059,GO:0034645,GO:0005623,GO:0043228,GO:0043232,GO:0044464,GO:0003674,GO:0005198,GO:…	cytoplasm,intracellular part,intracellular,organelle,intracellular organelle part,intracellular organelle,ribosomal subunit,translation,organelle part,structural constituent of ribosome,biosynthetic process,ribonucleoprotein complex,organic substance metabolic process,gene expression,cytoplasmic part,cellular metabolic process,organic substance biosynthetic process,cellular biosynthetic process,s…	ssc03010	Ribosome
ENSSSCT00000006139	ENSSSCG00000026555	DENND1A	chr1:298098084-298440570	15.1057	10.8961	0.47128	0.0061	0.135082	DENN/MADD domain containing 1A [Source:HGNC Symbol;Acc:HGNC:29324]	--	--	--	--
ENSSSCT00000002590	ENSSSCG00000002328	MED6	chr7:100611271-100629192	35.7292	27.3294	0.386654	0.02265	0.298862	mediator complex subunit 6 [Source:HGNC Symbol;Acc:HGNC:19970]	GO:0044428,GO:0044424,GO:0005654,GO:0031981,GO:0005622,GO:0070013,GO:0043233,GO:0031974,GO:0044451,GO:0005634,GO:0000428,GO:0030880,GO:0055029,GO:0044446,GO:0043231,GO:0043229,GO:0006352,GO:0044422,GO:0043226,GO:0043227,GO:0001128,GO:0006367,GO:0044237,GO:0070847,GO:0005623,GO:0032991,GO:0044238,GO:0034641,GO:0006139,GO:0044464,GO:0005575,GO:0016591,GO:0009987,GO:0008152,GO:1901360,GO:0032774,GO:…	nuclear part,intracellular part,nucleoplasm,nuclear lumen,intracellular,intracellular organelle lumen,organelle lumen,membrane-enclosed lumen,nucleoplasm part,nucleus,DNA-directed RNA polymerase complex,RNA polymerase complex,nuclear DNA-directed RNA polymerase complex,intracellular organelle part,intracellular membrane-bounded organelle,intracellular organelle,DNA-dependent transcription, initia…	--	--
ENSSSCT00000002596	ENSSSCG00000002333	DPF3	chr7:101881457-102041627	2.26497	0.7053	1.68318	0.00485	0.115109	D4, zinc and double PHD fingers, family 3 [Source:HGNC Symbol;Acc:HGNC:17427]	--	--	--	--
ENSSSCT00000002595	ENSSSCG00000002332	SIPA1L1	chr7:101270246-101416122	8.03132	3.66635	1.13129	5e-05	0.00318682	signal-induced proliferation-associated 1 like 1 [Source:HGNC Symbol;Acc:HGNC:20284]	--	--	ssc04015	Rap1 signaling pathway
ENSSSCT00000030523	ENSSSCG00000023379	UBE2L6	chr2:12987516-13002993	274.324	56.9284	2.26866	5e-05	0.00318682	ubiquitin conjugating enzyme E2L 6 [Source:HGNC Symbol;Acc:HGNC:12490]	--	--	ssc04120,ssc05012	Ubiquitin mediated proteolysis,Parkinson's disease
ENSSSCT00000030602	ENSSSCG00000030108	-	chr17:57190144-57221225	35.8538	6.26943	2.51572	5e-05	0.00318682	--	--	--	--	--
ENSSSCT00000030601	ENSSSCG00000028299	-	GL896304.2:10964-21478	11.564	14.8738	-0.363137	0.0315	0.356547	--	GO:0003674,GO:0008152,GO:0003824,GO:0005575,GO:0008150,GO:0016740,GO:0016020,GO:0016747,GO:0016746,GO:0044425,GO:0016021,GO:0031224	molecular_function,metabolic process,catalytic activity,cellular_component,biological_process,transferase activity,membrane,transferase activity, transferring acyl groups other than amino-acyl groups,transferase activity, transferring acyl groups,membrane part,integral to membrane,intrinsic to membrane	--	--
ENSSSCT00000006690	ENSSSCG00000006099	ESRP1	chr4:45307107-45373726	0.866457	1.32416	-0.611879	0.0175	0.258911	epithelial splicing regulatory protein 1 [Source:HGNC Symbol;Acc:HGNC:25966]	--	--	--	--
ENSSSCT00000022785	ENSSSCG00000020666	EHD4	chr1:144621555-144641473	72.7458	36.0416	1.0132	5e-05	0.00318682	EH domain containing 4 [Source:HGNC Symbol;Acc:HGNC:3245]	--	--	ssc04144	Endocytosis
ENSSSCT00000025436	ENSSSCG00000022101	BRCA1	chr12:20029800-20091791	2.54748	1.18645	1.10242	5e-05	0.00318682	breast cancer 1 [Source:HGNC Symbol;Acc:HGNC:1100]	--	--	ssc04120,ssc03460,ssc04151,ssc05206	Ubiquitin mediated proteolysis,Fanconi anemia pathway,PI3K-Akt signaling pathway,MicroRNAs in cancer
ENSSSCT00000019536	ENSSSCG00000017952	SAT2	chr12:55260975-55262606	13.0288	18.1808	-0.480711	0.00885	0.170886	spermidine/spermine N1-acetyltransferase family member 2 [Source:HGNC Symbol;Acc:HGNC:23160]	--	--	ssc01100,ssc00330	Metabolic pathways,Arginine and proline metabolism
ENSSSCT00000029330	ENSSSCG00000026795	-	chr9:73394791-73404796	7.39515	5.18807	0.51138	0.00135	0.0463331	--	--	--	ssc04360	Axon guidance
ENSSSCT00000008697	ENSSSCG00000007935	C16orf71	chr3:38712834-38726368	0.321706	0.738384	-1.19863	0.01905	0.271313	chromosome 16 open reading frame 71 [Source:HGNC Symbol;Acc:HGNC:25081]	--	--	--	--
ENSSSCT00000011746	ENSSSCG00000010734	OAT	chr14:145318779-145341081	248.34	343.169	-0.466603	0.00145	0.048842	ornithine aminotransferase [Source:HGNC Symbol;Acc:HGNC:8091]	--	--	ssc00330,ssc01100	Arginine and proline metabolism,Metabolic pathways
ENSSSCT00000015539	ENSSSCG00000014221	LVRN	chr2:125025064-125099681	1.05556	1.69503	-0.683296	0.002	0.0620239	laeverin [Source:HGNC Symbol;Acc:HGNC:26904]	--	--	--	--
ENSSSCT00000028884	ENSSSCG00000026430	DDX3Y	chrY:1045256-1191353	66.8175	90.5432	-0.438381	0.002	0.0620239	DEAD (Asp-Glu-Ala-Asp) box helicase 3, Y-linked [Source:HGNC Symbol;Acc:HGNC:2699]	--	--	--	--
ENSSSCT00000012988	ENSSSCG00000011874	PARP14	chr13:147430045-147483562	32.0183	7.9609	2.00789	5e-05	0.00318682	poly(ADP-ribose) polymerase family member 14 [Source:HGNC Symbol;Acc:HGNC:29232]	--	--	--	--
ENSSSCT00000014662	ENSSSCG00000013418	CFD	chr2:77485871-77487847	166.301	234.19	-0.493881	0.0003	0.01456	complement factor D (adipsin) [Source:HGNC Symbol;Acc:HGNC:2771]	--	--	ssc04610,ssc05150	Complement and coagulation cascades,Staphylococcus aureus infection
ENSSSCT00000014665	ENSSSCG00000013421	PTBP1	chr2:78360258-78369701	84.6122	70.3757	0.265787	0.0487	0.445442	polypyrimidine tract binding protein 1 [Source:HGNC Symbol;Acc:HGNC:9583]	GO:0044424,GO:0005515,GO:0003674,GO:0003723,GO:0043226,GO:0005622,GO:0043227,GO:0043229,GO:0008152,GO:0043231,GO:0044237,GO:0071704,GO:0032502,GO:0044421,GO:0043230,GO:0065010,GO:0070062,GO:0048856,GO:0036002,GO:0003676,GO:0005634,GO:0044238,GO:0005576,GO:0044767,GO:0005488,GO:0050793,GO:0044260,GO:0048869,GO:0031982,GO:0031988,GO:0043170,GO:0030154,GO:1901363,GO:1901360,GO:0097159,GO:0048519,GO:…	intracellular part,protein binding,molecular_function,RNA binding,organelle,intracellular,membrane-bounded organelle,intracellular organelle,metabolic process,intracellular membrane-bounded organelle,cellular metabolic process,organic substance metabolic process,developmental process,extracellular region part,extracellular organelle,extracellular membrane-bounded organelle,extracellular vesicular…	--	--
ENSSSCT00000000436	ENSSSCG00000000403	BAZ2A	chr5:23608230-23638130	7.44199	5.43527	0.453338	0.00325	0.0879544	bromodomain adjacent to zinc finger domain 2A [Source:HGNC Symbol;Acc:HGNC:962]	--	--	--	--
ENSSSCT00000026332	ENSSSCG00000000068	EP300	chr5:4574025-4655884	13.8239	8.57778	0.68849	5e-05	0.00318682	E1A binding protein p300 [Source:HGNC Symbol;Acc:HGNC:3373]	--	--	ssc05164,ssc05168,ssc05152,ssc05161,ssc05200,ssc04916,ssc05215,ssc04330,ssc05211,ssc05166,ssc04630,ssc04520,ssc05203,ssc05016,ssc04919,ssc04350,ssc04310,ssc04720,ssc04024,ssc04110,ssc04068,ssc04066,ssc05206,ssc05169	Influenza A,Herpes simplex infection,Tuberculosis,Hepatitis B,Pathways in cancer,Melanogenesis,Prostate cancer,Notch signaling pathway,Renal cell carcinoma,HTLV-I infection,Jak-STAT signaling pathway,Adherens junction,Viral carcinogenesis,Huntington's disease,Thyroid hormone signaling pathway,TGF-beta signaling pathway,Wnt signaling pathway,Long-term potentiation,cAMP signaling pathway,Cell cycle…
ENSSSCT00000028501	ENSSSCG00000024375	-	chr9:136360730-136364508	2.76666	1.42959	0.952543	0.004	0.100586	--	--	--	--	--
ENSSSCT00000028502	ENSSSCG00000022171	-	chr7:72865458-72909492	23.4086	17.3594	0.431322	0.0148	0.234379	--	--	--	--	--
ENSSSCT00000005947	ENSSSCG00000005404	-	GL892685.2:110441-156598	1.17128	1.58049	-0.432285	0.0406	0.406959	--	GO:0044424,GO:0005622,GO:0043229,GO:0005515,GO:0043226,GO:0007049,GO:0090304,GO:0022402,GO:0005575,GO:0097159,GO:1901363,GO:0043170,GO:0044260,GO:0000278,GO:1901360,GO:0044446,GO:0005488,GO:0000166,GO:1901265,GO:0044422,GO:0071704,GO:0034641,GO:0032991,GO:0044238,GO:0036094,GO:0000796,GO:0007076,GO:0051276,GO:0006139,GO:0046483,GO:0008152,GO:0006725,GO:0044237,GO:0005623,GO:0048285,GO:0006807,GO:…	intracellular part,intracellular,intracellular organelle,protein binding,organelle,cell cycle,nucleic acid metabolic process,cell cycle process,cellular_component,organic cyclic compound binding,heterocyclic compound binding,macromolecule metabolic process,cellular macromolecule metabolic process,mitotic cell cycle,organic cyclic compound metabolic process,intracellular organelle part,binding,nuc…	--	--
ENSSSCT00000006309	ENSSSCG00000005738	RALGDS	chr1:306700485-306714090	18.3672	12.3128	0.576973	0.0001	0.00583627	ral guanine nucleotide dissociation stimulator [Source:HGNC Symbol;Acc:HGNC:9842]	GO:0005829,GO:0005737,GO:0044424,GO:0005622,GO:0043227,GO:0005515,GO:0043226,GO:0043231,GO:0043229,GO:0071704,GO:0044444,GO:0044237,GO:0005488,GO:0044238,GO:0005575,GO:0005634,GO:0019222,GO:0008152,GO:0050790,GO:0044093,GO:1901360,GO:0044281,GO:0065009,GO:0051174,GO:0031323,GO:0043085,GO:0044248,GO:0006807,GO:0034641,GO:0046483,GO:0035556,GO:0019220,GO:0006725,GO:0006139,GO:0009117,GO:0006753,GO:…	cytosol,cytoplasm,intracellular part,intracellular,membrane-bounded organelle,protein binding,organelle,intracellular membrane-bounded organelle,intracellular organelle,organic substance metabolic process,cytoplasmic part,cellular metabolic process,binding,primary metabolic process,cellular_component,nucleus,regulation of metabolic process,metabolic process,regulation of catalytic activity,positi…	ssc05210,ssc04015,ssc05212,ssc05200,ssc04014	Colorectal cancer,Rap1 signaling pathway,Pancreatic cancer,Pathways in cancer,Ras signaling pathway
ENSSSCT00000024080	ENSSSCG00000028245	TTPAL	chr17:52372653-52387844	2.13927	1.59926	0.419715	0.02295	0.300884	tocopherol (alpha) transfer protein-like [Source:HGNC Symbol;Acc:HGNC:16114]	--	--	--	--
ENSSSCT00000031503	ENSSSCG00000023194	-	GL894097.2:15916-48202	8.06304	5.00483	0.688004	0.00475	0.11349	--	GO:0070008,GO:0043170,GO:0071704,GO:0044238,GO:0008152,GO:0019538,GO:0003824,GO:0008238,GO:0008236,GO:0017171,GO:0016787,GO:0006508,GO:0008233,GO:0004175,GO:0003674,GO:0070011,GO:0004252,GO:0008150	serine-type exopeptidase activity,macromolecule metabolic process,organic substance metabolic process,primary metabolic process,metabolic process,protein metabolic process,catalytic activity,exopeptidase activity,serine-type peptidase activity,serine hydrolase activity,hydrolase activity,proteolysis,peptidase activity,endopeptidase activity,molecular_function,peptidase activity, acting on L-amino…	--	--
ENSSSCT00000031505	ENSSSCG00000006564	RAB13	chr4:104606399-104611247	34.6125	44.654	-0.367498	0.0132	0.218269	RAB13, member RAS oncogene family [Source:HGNC Symbol;Acc:HGNC:9762]	--	--	ssc04530	Tight junction
ENSSSCT00000023043	ENSSSCG00000025551	-	chr7:46279207-46417272	2.13082	1.60181	0.411703	0.0325	0.362543	--	GO:0002376,GO:0030097,GO:0044424,GO:0002520,GO:0010468,GO:0048534,GO:0005622,GO:0010467,GO:0043231,GO:0043229,GO:0043227,GO:0048513,GO:0009888,GO:0043226,GO:2000112,GO:0010556,GO:0051216,GO:0060255,GO:0009058,GO:1901576,GO:0044249,GO:0034645,GO:0005634,GO:0002062,GO:0090304,GO:0003676,GO:0009059,GO:0019222,GO:0005575,GO:0031326,GO:0016070,GO:0009889,GO:0097159,GO:1901363,GO:0043170,GO:0044260,GO:…	immune system process,hemopoiesis,intracellular part,immune system development,regulation of gene expression,hematopoietic or lymphoid organ development,intracellular,gene expression,intracellular membrane-bounded organelle,intracellular organelle,membrane-bounded organelle,organ development,tissue development,organelle,regulation of cellular macromolecule biosynthetic process,regulation of macro…	ssc05202	Transcriptional misregulation in cancer
ENSSSCT00000035570	ENSSSCG00000005943	ST3GAL1	chr4:7685581-7776990	0.765612	0.135351	2.49991	0.00985	0.181329	ST3 beta-galactoside alpha-2,3-sialyltransferase 1 [Source:HGNC Symbol;Acc:HGNC:10862]	--	--	ssc00512,ssc00603,ssc00533,ssc00604,ssc01100	Mucin type O-Glycan biosynthesis,Glycosphingolipid biosynthesis - globo series,Glycosaminoglycan biosynthesis - keratan sulfate,Glycosphingolipid biosynthesis - ganglio series,Metabolic pathways
ENSSSCT00000027743	ENSSSCG00000025023	-	chr2:162310112-162315342	4.44372	2.77393	0.679838	0.0017	0.0549108	--	--	--	--	--
ENSSSCT00000016469	ENSSSCG00000015103	RPS25	chr9:51274635-51276899	1126.73	1460.84	-0.37465	0.0064	0.139488	ribosomal protein S25 [Source:HGNC Symbol;Acc:HGNC:10413]	--	--	ssc03010	Ribosome
ENSSSCT00000015282	ENSSSCG00000013991	C1orf35	chr2:53870873-53873178	37.9977	49.5419	-0.382735	0.0126	0.211958	chromosome 1 open reading frame 35 [Source:HGNC Symbol;Acc:HGNC:19032]	--	--	--	--
ENSSSCT00000012390	ENSSSCG00000011317	FYCO1	chr13:32166987-32239205	17.8553	13.8033	0.371341	0.0139	0.225451	FYVE and coiled-coil domain-containing protein 1 [Source:RefSeq peptide;Acc:NP_001121949]	--	--	--	--
ENSSSCT00000028294	ENSSSCG00000027340	-	chr8:19626476-19638881	11.6945	6.65522	0.813268	5e-05	0.00318682	--	--	--	ssc00562,ssc04070,ssc01100	Inositol phosphate metabolism,Phosphatidylinositol signaling system,Metabolic pathways
ENSSSCT00000018315	ENSSSCG00000016822	AMACR	chr16:20765283-20782822	9.16426	11.7412	-0.357491	0.0422	0.415532	alpha-methylacyl-CoA racemase [Source:HGNC Symbol;Acc:HGNC:451]	GO:0044424,GO:0005622,GO:0043231,GO:0043229,GO:0043227,GO:0008202,GO:0005515,GO:0043226,GO:0005737,GO:0005777,GO:0042579,GO:0044444,GO:0005575,GO:0008206,GO:1901360,GO:0005488,GO:0005739,GO:0008111,GO:0071704,GO:0044238,GO:0008152,GO:0005102,GO:0006629,GO:0044237,GO:0005623,GO:0044464,GO:0003824,GO:0032787,GO:0016854,GO:0016853,GO:0019752,GO:0009987,GO:0043436,GO:0006082,GO:0044710,GO:0003674,GO:…	intracellular part,intracellular,intracellular membrane-bounded organelle,intracellular organelle,membrane-bounded organelle,steroid metabolic process,protein binding,organelle,cytoplasm,peroxisome,microbody,cytoplasmic part,cellular_component,bile acid metabolic process,organic cyclic compound metabolic process,binding,mitochondrion,alpha-methylacyl-CoA racemase activity,organic substance metabo…	ssc00120,ssc04146,ssc01100	Primary bile acid biosynthesis,Peroxisome,Metabolic pathways
ENSSSCT00000004481	ENSSSCG00000004053	TAGAP	chr1:10042141-10052624	14.6594	9.93029	0.561919	0.0001	0.00583627	t-cell activation Rho GTPase-activating protein [Source:RefSeq peptide;Acc:NP_001230472]	--	--	--	--
ENSSSCT00000004488	ENSSSCG00000004059	-	chr1:10508258-10510504	3.64528	5.42345	-0.573182	0.01425	0.228964	--	--	--	--	--
ENSSSCT00000015701	ENSSSCG00000014371	-	chr2:148295943-148304923	171.263	227.998	-0.412809	0.00895	0.172157	--	--	--	ssc00190,ssc05016,ssc05010,ssc05012,ssc04932,ssc01100	Oxidative phosphorylation,Huntington's disease,Alzheimer's disease,Parkinson's disease,Non-alcoholic fatty liver disease (NAFLD),Metabolic pathways
ENSSSCT00000015704	ENSSSCG00000014374	DND1	chr2:148329173-148331356	0.308384	0.771374	-1.3227	0.0085	0.16693	DND microRNA-mediated repression inhibitor 1 [Source:HGNC Symbol;Acc:HGNC:23799]	--	--	--	--
ENSSSCT00000002656	ENSSSCG00000002389	VASH1	chr7:105960536-105978240	22.5201	28.5518	-0.342373	0.0137	0.223454	vasohibin 1 [Source:HGNC Symbol;Acc:HGNC:19964]	--	--	--	--
ENSSSCT00000002650	ENSSSCG00000002383	FOS	chr7:104293656-104297121	34.9577	48.1097	-0.460718	0.00105	0.0383399	FBJ murine osteosarcoma viral oncogene homolog [Source:HGNC Symbol;Acc:HGNC:3796]	--	--	ssc05168,ssc04620,ssc05031,ssc05161,ssc04725,ssc05140,ssc04380,ssc05133,ssc05200,ssc04668,ssc04728,ssc04713,ssc04917,ssc05166,ssc05210,ssc04662,ssc05132,ssc04915,ssc05142,ssc04921,ssc04024,ssc04660,ssc04010,ssc05323	Herpes simplex infection,Toll-like receptor signaling pathway,Amphetamine addiction,Hepatitis B,Cholinergic synapse,Leishmaniasis,Osteoclast differentiation,Pertussis,Pathways in cancer,TNF signaling pathway,Dopaminergic synapse,Circadian entrainment,Prolactin signaling pathway,HTLV-I infection,Colorectal cancer,B cell receptor signaling pathway,Salmonella infection,Estrogen signaling pathway,Cha…
ENSSSCT00000009843	ENSSSCG00000008986	2017-09-11	chr8:76838236-76877090	70.5401	86.4935	-0.294148	0.0338	0.370295	septin 11 [Source:HGNC Symbol;Acc:HGNC:25589]	--	--	ssc05100	Bacterial invasion of epithelial cells
ENSSSCT00000009847	ENSSSCG00000008990	MRPL1	chr8:77608623-77656919	72.1739	53.3542	0.435875	0.0028	0.0791836	mitochondrial ribosomal protein L1 [Source:HGNC Symbol;Acc:HGNC:14275]	--	--	ssc03010	Ribosome
ENSSSCT00000000493	ENSSSCG00000000457	-	chr5:29581111-29800775	42.5165	29.4472	0.529894	0.0001	0.00583627	--	--	--	--	--
ENSSSCT00000016705	ENSSSCG00000015332	-	chr9:82327317-82339662	21.9087	39.3047	-0.843202	5e-05	0.00318682	serum paraoxonase/arylesterase 1 precursor [Source:RefSeq peptide;Acc:NP_001090984]	GO:0042221,GO:0004063,GO:0050896,GO:0006796,GO:0006793,GO:0016311,GO:0016840,GO:0016843,GO:0016844,GO:0004064,GO:0008150,GO:0009987,GO:0008152,GO:0009636,GO:0003674,GO:0003824,GO:0044237,GO:0005575,GO:0052689,GO:0016829,GO:0016787,GO:0005615,GO:0016791,GO:0042578,GO:0016788,GO:0009058,GO:0005576,GO:0044421	response to chemical stimulus,aryldialkylphosphatase activity,response to stimulus,phosphate-containing compound metabolic process,phosphorus metabolic process,dephosphorylation,carbon-nitrogen lyase activity,amine-lyase activity,strictosidine synthase activity,arylesterase activity,biological_process,cellular process,metabolic process,response to toxic substance,molecular_function,catalytic acti…	ssc01100	Metabolic pathways
ENSSSCT00000006030	ENSSSCG00000005484	ZNF618	chr1:285628675-285700029	1.91237	0.455985	2.0683	5e-05	0.00318682	zinc finger protein 618 [Source:HGNC Symbol;Acc:HGNC:29416]	--	--	--	--
ENSSSCT00000017899	ENSSSCG00000016438	NUB1	chr18:6247052-6274899	63.2887	49.0516	0.367648	0.0082	0.163009	negative regulator of ubiquitin-like proteins 1 [Source:HGNC Symbol;Acc:HGNC:17623]	GO:0005737,GO:0044424,GO:0005622,GO:0043227,GO:0005515,GO:0043226,GO:0043231,GO:0044446,GO:0043229,GO:0044422,GO:0070013,GO:0043233,GO:0031974,GO:0005488,GO:0044428,GO:0005730,GO:0031981,GO:0005575,GO:0005634,GO:0005623,GO:0043228,GO:0043232,GO:0044464,GO:0003674	cytoplasm,intracellular part,intracellular,membrane-bounded organelle,protein binding,organelle,intracellular membrane-bounded organelle,intracellular organelle part,intracellular organelle,organelle part,intracellular organelle lumen,organelle lumen,membrane-enclosed lumen,binding,nuclear part,nucleolus,nuclear lumen,cellular_component,nucleus,cell,non-membrane-bounded organelle,intracellular no…	--	--
ENSSSCT00000017273	ENSSSCG00000015862	LIMS2	chr15:66435455-66453016	27.3468	34.8327	-0.349072	0.0208	0.285533	LIM and senescent cell antigen-like domains 2 [Source:HGNC Symbol;Acc:HGNC:16084]	--	--	--	--
ENSSSCT00000028150	ENSSSCG00000025181	-	chr3:109622368-109667785	118.358	31.4879	1.91029	5e-05	0.00318682	--	--	--	ssc05164,ssc05162,ssc05160,ssc05168,ssc05169,ssc05203,ssc04141	Influenza A,Measles,Hepatitis C,Herpes simplex infection,Epstein-Barr virus infection,Viral carcinogenesis,Protein processing in endoplasmic reticulum
ENSSSCT00000028155	ENSSSCG00000006954	-	chr4:1039935-1047372	76.4853	97.5875	-0.351514	0.00975	0.180113	--	--	--	ssc05168	Herpes simplex infection
ENSSSCT00000015126	ENSSSCG00000013848	RAB8A	chr2:61176943-61196619	45.9084	31.4529	0.545565	0.0001	0.00583627	RAB8A, member RAS oncogene family [Source:HGNC Symbol;Acc:HGNC:7007]	--	--	ssc04152,ssc04972	AMPK signaling pathway,Pancreatic secretion
ENSSSCT00000012630	ENSSSCG00000011540	SETD5	chr13:72888620-72927643	6.95022	5.50176	0.337167	0.02605	0.320802	SET domain containing 5 [Source:HGNC Symbol;Acc:HGNC:25566]	GO:0005515,GO:0005488,GO:0003674	protein binding,binding,molecular_function	--	--
ENSSSCT00000010983	ENSSSCG00000010026	PIK3IP1	chr14:51151821-51162385	66.2595	84.9441	-0.358385	0.0164	0.249672	phosphoinositide-3-kinase interacting protein 1 [Source:HGNC Symbol;Acc:HGNC:24942]	--	--	--	--
ENSSSCT00000010981	ENSSSCG00000010024	RNF185	chr14:51057233-51088417	30.9121	38.6068	-0.320682	0.04485	0.427127	ring finger protein 185 [Source:HGNC Symbol;Acc:HGNC:26783]	--	--	ssc04141	Protein processing in endoplasmic reticulum
ENSSSCT00000014740	ENSSSCG00000013494	MATK	chr2:75503305-75510472	7.31195	10.8237	-0.56587	0.00125	0.0437374	megakaryocyte-associated tyrosine kinase [Source:HGNC Symbol;Acc:HGNC:6906]	--	--	ssc04722	Neurotrophin signaling pathway
ENSSSCT00000007266	ENSSSCG00000006630	VPS72	chr4:107315107-107326840	70.9918	86.8222	-0.290411	0.0381	0.393844	vacuolar protein sorting 72 homolog (S. cerevisiae) [Source:HGNC Symbol;Acc:HGNC:11644]	--	--	--	--
ENSSSCT00000015919	ENSSSCG00000014569	-	chr9:776500-779650	196.835	261.652	-0.410664	0.00335	0.0898266	--	--	--	ssc03010	Ribosome
ENSSSCT00000015915	ENSSSCG00000014565	-	chr2:162095325-162097509	104.026	10.4213	3.31933	5e-05	0.00318682	--	--	--	--	--
ENSSSCT00000003396	ENSSSCG00000003059	ZNF428	chr6:46206199-46211724	7.13269	13.1809	-0.885935	0.0004	0.0182909	zinc finger protein 428 [Source:HGNC Symbol;Acc:HGNC:20804]	--	--	--	--
ENSSSCT00000024474	ENSSSCG00000027709	PARP9	chr13:147586920-147621804	70.8001	13.3183	2.41034	5e-05	0.00318682	poly(ADP-ribose) polymerase family member 9 [Source:HGNC Symbol;Acc:HGNC:24118]	--	--	--	--
ENSSSCT00000030170	ENSSSCG00000028382	PCDHGA11	chr2:149276951-149279387	4.39327	3.22654	0.445305	0.02055	0.283648	protocadherin gamma subfamily A, 11 [Source:HGNC Symbol;Acc:HGNC:8698]	--	--	--	--
ENSSSCT00000025705	ENSSSCG00000023633	-	chr11:86848979-86855079	3.46159	2.36594	0.549019	0.01325	0.218801	--	--	--	--	--
ENSSSCT00000036300	ENSSSCG00000012201	CXorf21	chrX:28635265-28651197	20.4029	9.97738	1.03204	0.03535	0.378998	chromosome X open reading frame 21 [Source:HGNC Symbol;Acc:HGNC:25667]	--	--	--	--
ENSSSCT00000026428	ENSSSCG00000025192	RPL9	chr8:32308211-32314218	434.353	535.283	-0.301433	0.0375	0.390441	ribosomal protein L9 [Source:HGNC Symbol;Acc:HGNC:10369]	GO:0005829,GO:0005737,GO:0044424,GO:0005622,GO:0043227,GO:0005515,GO:0043226,GO:0043231,GO:0070161,GO:0044446,GO:0043229,GO:0005925,GO:0005924,GO:0030055,GO:0044391,GO:0006412,GO:0005912,GO:0044422,GO:0003735,GO:0003723,GO:0009058,GO:0030529,GO:0071704,GO:0010467,GO:0044444,GO:0044237,GO:1901576,GO:0070013,GO:0044249,GO:0043233,GO:0097159,GO:1901363,GO:0031974,GO:0022626,GO:0005488,GO:0005840,GO:…	cytosol,cytoplasm,intracellular part,intracellular,membrane-bounded organelle,protein binding,organelle,intracellular membrane-bounded organelle,anchoring junction,intracellular organelle part,intracellular organelle,focal adhesion,cell-substrate adherens junction,cell-substrate junction,ribosomal subunit,translation,adherens junction,organelle part,structural constituent of ribosome,RNA binding,…	ssc03010	Ribosome
ENSSSCT00000032552	ENSSSCG00000027103	CNIH4	chr10:15124440-15129031	22.0219	13.9912	0.654419	0.0001	0.00583627	cornichon family AMPA receptor auxiliary protein 4 [Source:HGNC Symbol;Acc:HGNC:25013]	--	--	--	--
ENSSSCT00000024863	ENSSSCG00000027528	TMEM107	chr12:55867070-55872417	6.44166	8.29884	-0.365478	0.0175	0.258911	transmembrane protein 107 [Source:HGNC Symbol;Acc:HGNC:28128]	--	--	--	--
ENSSSCT00000016131	ENSSSCG00000014780	TRIM21	chr9:6536120-6543906	45.6004	20.5571	1.14941	5e-05	0.00318682	tripartite motif containing 21 [Source:HGNC Symbol;Acc:HGNC:11312]	--	--	ssc05322	Systemic lupus erythematosus
ENSSSCT00000016132	ENSSSCG00000014781	-	chr9:6547317-6548268	0.770642	0.185929	2.05131	0.02545	0.316458	--	--	--	ssc04740	Olfactory transduction
ENSSSCT00000018666	ENSSSCG00000017146	RNF213	chr12:1995857-2099373	104.064	16.9911	2.61463	5e-05	0.00318682	ring finger protein 213 [Source:HGNC Symbol;Acc:HGNC:14539]	GO:0016567,GO:0032446,GO:0070647,GO:0004842,GO:0019787,GO:0016881,GO:0016879,GO:1901363,GO:0016874,GO:0097159,GO:0005515,GO:0036094,GO:0008150,GO:0009987,GO:0000166,GO:1901265,GO:0043412,GO:0008152,GO:0016462,GO:0016818,GO:0016817,GO:0046914,GO:0035639,GO:0001883,GO:0032550,GO:0001882,GO:0032549,GO:0008270,GO:0032555,GO:0017076,GO:0032553,GO:0006464,GO:0036211,GO:0003674,GO:0005488,GO:0043168,GO:…	protein ubiquitination,protein modification by small protein conjugation,protein modification by small protein conjugation or removal,ubiquitin-protein ligase activity,small conjugating protein ligase activity,acid-amino acid ligase activity,ligase activity, forming carbon-nitrogen bonds,heterocyclic compound binding,ligase activity,organic cyclic compound binding,protein binding,small molecule b…	--	--
ENSSSCT00000018668	ENSSSCG00000017148	-	chr12:2102368-2163107	98.6424	16.7513	2.55794	5e-05	0.00318682	--	GO:0016567,GO:0032446,GO:0070647,GO:0004842,GO:0019787,GO:0016881,GO:0016879,GO:0016874,GO:0008150,GO:0009987,GO:0043412,GO:0008152,GO:0016462,GO:0016818,GO:0016817,GO:0006464,GO:0036211,GO:0003674,GO:0003824,GO:0044237,GO:0017111,GO:0019538,GO:0044267,GO:0016787,GO:0044238,GO:0043170,GO:0044260,GO:0016887,GO:0071704	protein ubiquitination,protein modification by small protein conjugation,protein modification by small protein conjugation or removal,ubiquitin-protein ligase activity,small conjugating protein ligase activity,acid-amino acid ligase activity,ligase activity, forming carbon-nitrogen bonds,ligase activity,biological_process,cellular process,macromolecule modification,metabolic process,pyrophosphata…	--	--
ENSSSCT00000016954	ENSSSCG00000015564	TSEN15	chr9:137621560-137657224	5.17396	7.58689	-0.552238	0.0333	0.367536	tRNA splicing endonuclease subunit 15 [Source:HGNC Symbol;Acc:HGNC:16791]	--	--	--	--
ENSSSCT00000016955	ENSSSCG00000015565	C1orf21	chr9:137972542-138217904	1.39658	1.98494	-0.507197	0.047	0.437676	chromosome 1 open reading frame 21 [Source:HGNC Symbol;Acc:HGNC:15494]	--	--	--	--
ENSSSCT00000016953	ENSSSCG00000015563	RGL1	chr9:137378037-137471014	23.6342	17.6308	0.422782	0.0061	0.135082	ral guanine nucleotide dissociation stimulator-like 1 [Source:HGNC Symbol;Acc:HGNC:30281]	--	--	ssc04014	Ras signaling pathway
ENSSSCT00000014887	ENSSSCG00000013632	C19orf38	chr2:70020223-70035675	39.4744	51.746	-0.39053	0.0074	0.15347	chromosome 19 open reading frame 38 [Source:HGNC Symbol;Acc:HGNC:34073]	--	--	--	--
ENSSSCT00000023357	ENSSSCG00000023599	TIMM8B	chr9:44629777-44632100	161.742	204.311	-0.337071	0.0205	0.283254	translocase of inner mitochondrial membrane 8 homolog B (yeast) [Source:HGNC Symbol;Acc:HGNC:11818]	--	--	--	--
ENSSSCT00000029677	ENSSSCG00000021886	-	chr2:158079947-158087303	55.7518	43.4256	0.360474	0.03935	0.400359	--	--	--	ssc04144,ssc04640,ssc04380,ssc04060,ssc04015,ssc05202,ssc05200,ssc04014,ssc04151	Endocytosis,Hematopoietic cell lineage,Osteoclast differentiation,Cytokine-cytokine receptor interaction,Rap1 signaling pathway,Transcriptional misregulation in cancer,Pathways in cancer,Ras signaling pathway,PI3K-Akt signaling pathway
ENSSSCT00000029676	ENSSSCG00000009611	XPO7	chr14:6629337-6721983	29.6143	17.4532	0.762805	0.0086	0.168247	exportin 7 [Source:HGNC Symbol;Acc:HGNC:14108]	--	--	--	--
ENSSSCT00000007388	ENSSSCG00000006743	SLC22A15	chr4:114752825-114845145	13.5344	7.9932	0.75979	5e-05	0.00318682	solute carrier family 22 member 15 [Source:HGNC Symbol;Acc:HGNC:20301]	--	--	--	--
ENSSSCT00000007380	ENSSSCG00000006737	IGSF3	chr4:114056406-114166174	2.59798	2.02262	0.361165	0.03365	0.369533	immunoglobulin superfamily member 3 [Source:HGNC Symbol;Acc:HGNC:5950]	--	--	--	--
ENSSSCT00000007031	ENSSSCG00000006418	-	chr4:99372428-99425706	7.96878	1.1837	2.75105	5e-05	0.00318682	--	--	--	--	--
ENSSSCT00000002238	ENSSSCG00000002000	IPO4	chr7:80381675-80396581	12.6885	9.6073	0.401316	0.0134	0.220383	importin 4 [Source:HGNC Symbol;Acc:HGNC:19426]	--	--	--	--
ENSSSCT00000032331	ENSSSCG00000021357	-	chr5:24392767-24541447	18.785	12.8488	0.547948	0.0442	0.424561	--	--	--	--	--
ENSSSCT00000006805	ENSSSCG00000006209	-	chr4:74131918-74223591	62.0648	38.2322	0.698989	5e-05	0.00318682	--	--	--	--	--
ENSSSCT00000025578	ENSSSCG00000022915	-	chr17:57224591-57234179	12.9103	16.8731	-0.386201	0.01645	0.250109	--	--	--	--	--
ENSSSCT00000025570	ENSSSCG00000029890	-	chr2:16493478-16495581	0.29121	0.581919	-0.998759	0.02215	0.294881	--	--	--	--	--
ENSSSCT00000035645	ENSSSCG00000012727	FMR1	chrX:137792660-137831725	18.6237	14.2047	0.390777	0.0422	0.415532	fragile X mental retardation 1 [Source:HGNC Symbol;Acc:HGNC:3775]	--	--	ssc03013	RNA transport
ENSSSCT00000030233	ENSSSCG00000021092	-	chr2:146033752-146039799	3.87991	2.40345	0.690916	0.00685	0.14586	--	--	--	--	--
ENSSSCT00000036174	ENSSSCG00000005711	NUP214	chr1:305131024-305241772	7.91539	5.08374	0.638771	0.031	0.353417	nucleoporin 214kDa [Source:HGNC Symbol;Acc:HGNC:8064]	GO:0044424,GO:0005622,GO:0043231,GO:0043229,GO:0043227,GO:0051649,GO:0005515,GO:0043226,GO:0007049,GO:0070161,GO:0051641,GO:0005634,GO:0005925,GO:0005912,GO:0005924,GO:0030055,GO:0005575,GO:0051726,GO:0005488,GO:0046907,GO:0030054,GO:0016482,GO:0065007,GO:0005623,GO:0050789,GO:0006403,GO:0051179,GO:0051170,GO:0006605,GO:0005487,GO:0050794,GO:0044464,GO:0050657,GO:0050658,GO:0051236,GO:0015031,GO:…	intracellular part,intracellular,intracellular membrane-bounded organelle,intracellular organelle,membrane-bounded organelle,establishment of localization in cell,protein binding,organelle,cell cycle,anchoring junction,cellular localization,nucleus,focal adhesion,adherens junction,cell-substrate adherens junction,cell-substrate junction,cellular_component,regulation of cell cycle,binding,intracel…	ssc03013,ssc05169	RNA transport,Epstein-Barr virus infection
ENSSSCT00000029479	ENSSSCG00000028338	PAMR1	chr2:27877534-27954885	13.0247	9.91235	0.39395	0.01205	0.206158	peptidase domain containing associated with muscle regeneration 1 [Source:HGNC Symbol;Acc:HGNC:24554]	--	--	--	--
ENSSSCT00000025969	ENSSSCG00000005043	DDHD1	chr1:202932402-203018826	3.62495	5.87755	-0.697252	0.04145	0.411476	DDHD domain containing 1 [Source:HGNC Symbol;Acc:HGNC:19714]	--	--	--	--
ENSSSCT00000016361	ENSSSCG00000014997	-	chr9:39189333-39207992	199.266	130.998	0.605149	5e-05	0.00318682	--	--	--	--	--
ENSSSCT00000028469	ENSSSCG00000029083	-	GL896221.1:1534-4508	44.9475	59.0336	-0.393296	0.02965	0.344923	--	--	--	--	--
ENSSSCT00000007996	ENSSSCG00000007308	ROMO1	chr17:44351925-44381550	130.394	179.832	-0.463773	0.00705	0.148682	reactive oxygen species modulator 1 [Source:HGNC Symbol;Acc:HGNC:16185]	--	--	--	--
ENSSSCT00000024025	ENSSSCG00000028585	CBLL1	chr9:118190325-118322545	7.17734	4.45092	0.689346	5e-05	0.00318682	Cbl proto-oncogene-like 1, E3 ubiquitin protein ligase [Source:HGNC Symbol;Acc:HGNC:21225]	--	--	--	--
ENSSSCT00000027819	ENSSSCG00000024614	ITSN1	chr13:207205350-207267685	39.8852	26.2922	0.601219	5e-05	0.00318682	intersectin 1 [Source:HGNC Symbol;Acc:HGNC:6183]	--	--	--	--
ENSSSCT00000003885	ENSSSCG00000003497	PLA2G2D	chr6:72580426-72587136	33.8402	20.1945	0.744772	5e-05	0.00318682	phospholipase A2 group IID [Source:HGNC Symbol;Acc:HGNC:9033]	--	--	ssc00565,ssc04014,ssc00564,ssc00591,ssc04972,ssc00592,ssc04975,ssc04270,ssc00590,ssc01100	Ether lipid metabolism,Ras signaling pathway,Glycerophospholipid metabolism,Linoleic acid metabolism,Pancreatic secretion,alpha-Linolenic acid metabolism,Fat digestion and absorption,Vascular smooth muscle contraction,Arachidonic acid metabolism,Metabolic pathways
ENSSSCT00000031428	ENSSSCG00000024018	SLC16A3	chr12:963451-967637	7.67666	11.0754	-0.528805	0.00105	0.0383399	solute carrier family 16 (monocarboxylate transporter), member 3 [Source:HGNC Symbol;Acc:HGNC:10924]	--	--	--	--
ENSSSCT00000023124	ENSSSCG00000021504	IFN-ALPHAOMEGA	chr1:225450726-225451285	0.645795	0	inf	5e-05	0.00318682	-	--	--	ssc05164,ssc05168,ssc05162,ssc04623,ssc04620,ssc05160,ssc05152,ssc05161,ssc04060,ssc04630,ssc04650,ssc04622,ssc04151,ssc05320,ssc04140	Influenza A,Herpes simplex infection,Measles,Cytosolic DNA-sensing pathway,Toll-like receptor signaling pathway,Hepatitis C,Tuberculosis,Hepatitis B,Cytokine-cytokine receptor interaction,Jak-STAT signaling pathway,Natural killer cell mediated cytotoxicity,RIG-I-like receptor signaling pathway,PI3K-Akt signaling pathway,Autoimmune thyroid disease,Regulation of autophagy
ENSSSCT00000016501	ENSSSCG00000015135	SORL1	chr9:53830780-53907681	40.575	17.8699	1.18306	5e-05	0.00318682	sortilin-related receptor, L(DLR class) A repeats containing [Source:HGNC Symbol;Acc:HGNC:11185]	--	--	--	--
ENSSSCT00000028661	ENSSSCG00000028322	BTG2	chr9:70327444-70331400	24.8377	38.2307	-0.622199	5e-05	0.00318682	BTG family member 2 [Source:HGNC Symbol;Acc:HGNC:1131]	--	--	ssc03018	RNA degradation
ENSSSCT00000023786	ENSSSCG00000021274	-	JH118764.1:41147-56270	2.14672	1.40197	0.614677	0.0142	0.228469	--	GO:0097159,GO:1901363,GO:0005488,GO:0003676,GO:0000166,GO:1901265,GO:0036094,GO:0005524,GO:0035639,GO:0001883,GO:0032550,GO:0032559,GO:0001882,GO:0032549,GO:0030554,GO:0003674,GO:0032555,GO:0017076,GO:0032553,GO:0043168,GO:0043167	organic cyclic compound binding,heterocyclic compound binding,binding,nucleic acid binding,nucleotide binding,nucleoside phosphate binding,small molecule binding,ATP binding,purine ribonucleoside triphosphate binding,purine nucleoside binding,purine ribonucleoside binding,adenyl ribonucleotide binding,nucleoside binding,ribonucleoside binding,adenyl nucleotide binding,molecular_function,purine ri…	ssc04918	Thyroid hormone synthesis
ENSSSCT00000027172	ENSSSCG00000027268	-	chr13:27927487-28001030	3.02141	7.71233	-1.35195	0.03155	0.356873	--	--	--	--	--
ENSSSCT00000014213	ENSSSCG00000013002	-	chr2:6203199-6204847	952.675	1282.44	-0.428836	0.00255	0.0741254	--	--	--	ssc03010	Ribosome
ENSSSCT00000013298	ENSSSCG00000012157	PHKA2	chrX:16491727-16573689	2.27995	1.49334	0.61046	0.0009	0.0341662	phosphorylase kinase, alpha 2 (liver) [Source:HGNC Symbol;Acc:HGNC:8926]	--	--	ssc04910,ssc04020	Insulin signaling pathway,Calcium signaling pathway
ENSSSCT00000010015	ENSSSCG00000009146	RPL34	chr8:121707344-121711622	894.363	1177.46	-0.396745	0.0036	0.0936692	ribosomal protein L34 [Source:HGNC Symbol;Acc:HGNC:10340]	--	--	ssc03010	Ribosome
ENSSSCT00000015628	ENSSSCG00000014304	SEC24A	chr2:142498899-142565796	24.5582	19.6527	0.321471	0.02035	0.282084	SEC24 homolog A, COPII coat complex component [Source:HGNC Symbol;Acc:HGNC:10703]	GO:0005737,GO:0044424,GO:0005622,GO:0043227,GO:0005515,GO:0043226,GO:0043231,GO:0044446,GO:0043229,GO:2000188,GO:0044422,GO:0009058,GO:0071704,GO:0044444,GO:0046907,GO:0044237,GO:1901576,GO:0051641,GO:0010869,GO:0032800,GO:0051649,GO:0006886,GO:0005488,GO:0055088,GO:0048518,GO:0005575,GO:0032844,GO:0042592,GO:0042632,GO:0055092,GO:0019222,GO:0065008,GO:0008152,GO:0051046,GO:0048522,GO:0043170,GO:…	cytoplasm,intracellular part,intracellular,membrane-bounded organelle,protein binding,organelle,intracellular membrane-bounded organelle,intracellular organelle part,intracellular organelle,regulation of cholesterol homeostasis,organelle part,biosynthetic process,organic substance metabolic process,cytoplasmic part,intracellular transport,cellular metabolic process,organic substance biosynthetic …	ssc04141	Protein processing in endoplasmic reticulum
ENSSSCT00000015626	ENSSSCG00000014303	JADE2	chr2:142398392-142446363	6.28111	3.64107	0.786657	5e-05	0.00318682	jade family PHD finger 2 [Source:HGNC Symbol;Acc:HGNC:22984]	GO:0044424,GO:0005622,GO:0043231,GO:0043229,GO:0043227,GO:0005515,GO:0043226,GO:0005634,GO:0005575,GO:0060395,GO:0044446,GO:0005488,GO:0044422,GO:0007178,GO:0065007,GO:0044428,GO:0007167,GO:0005623,GO:0050789,GO:0046914,GO:0070013,GO:0043233,GO:0031974,GO:0008270,GO:0050794,GO:0044464,GO:0031981,GO:0050896,GO:0005654,GO:0007166,GO:0043167,GO:0043169,GO:0044763,GO:0046872,GO:0051716,GO:0009987,GO:…	intracellular part,intracellular,intracellular membrane-bounded organelle,intracellular organelle,membrane-bounded organelle,protein binding,organelle,nucleus,cellular_component,SMAD protein signal transduction,intracellular organelle part,binding,organelle part,transmembrane receptor protein serine/threonine kinase signaling pathway,biological regulation,nuclear part,enzyme linked receptor prote…	--	--
ENSSSCT00000022256	ENSSSCG00000022011	NMI	chr15:3599-29467	46.4875	23.2764	0.997975	5e-05	0.00318682	N-myc and STAT interactor [Source:HGNC Symbol;Acc:HGNC:7854]	--	--	--	--
ENSSSCT00000002526	ENSSSCG00000002268	AKAP5	chr7:94903220-94904504	7.64346	10.0338	-0.392563	0.0365	0.385329	A-kinase anchoring protein 5 [Source:HGNC Symbol;Acc:HGNC:375]	--	--	--	--
ENSSSCT00000008523	ENSSSCG00000007776	BCL7C	chr3:17949268-17953736	47.58	60.4738	-0.345956	0.01855	0.267204	B-cell CLL/lymphoma 7C [Source:HGNC Symbol;Acc:HGNC:1006]	--	--	--	--
ENSSSCT00000029908	ENSSSCG00000023033	PARP3	chr13:37272322-37280834	10.6333	6.81395	0.64202	0.00305	0.0840824	poly(ADP-ribose) polymerase family member 3 [Source:HGNC Symbol;Acc:HGNC:273]	GO:0006950,GO:0044424,GO:0005622,GO:0043226,GO:0044446,GO:0043229,GO:0044422,GO:0009058,GO:0071704,GO:0044237,GO:1901576,GO:0051641,GO:0044249,GO:0048518,GO:0044238,GO:0005575,GO:0042592,GO:0019222,GO:0033365,GO:0065008,GO:0008152,GO:0007346,GO:0044267,GO:0019538,GO:0051726,GO:0000723,GO:0032200,GO:0048522,GO:0033554,GO:0043170,GO:0051276,GO:0009893,GO:0060255,GO:1901360,GO:0060249,GO:0044260,GO:…	response to stress,intracellular part,intracellular,organelle,intracellular organelle part,intracellular organelle,organelle part,biosynthetic process,organic substance metabolic process,cellular metabolic process,organic substance biosynthetic process,cellular localization,cellular biosynthetic process,positive regulation of biological process,primary metabolic process,cellular_component,homeost…	ssc03410	Base excision repair
ENSSSCT00000015043	ENSSSCG00000013768	-	chr2:65381888-65384075	1.92963	2.75599	-0.514244	0.04435	0.424815	uncharacterized protein LOC100513647 [Source:RefSeq peptide;Acc:NP_001231798]	--	--	--	--
ENSSSCT00000018832	ENSSSCG00000017298	TANC2	chr12:15440846-15617996	28.6662	22.2966	0.362526	0.00945	0.176555	tetratricopeptide repeat, ankyrin repeat and coiled-coil containing 2 [Source:HGNC Symbol;Acc:HGNC:30212]	--	--	--	--
ENSSSCT00000018837	ENSSSCG00000017301	TLK2	chr12:16019788-16101830	16.4858	12.7795	0.367398	0.0076	0.155879	tousled like kinase 2 [Source:HGNC Symbol;Acc:HGNC:11842]	--	--	--	--
ENSSSCT00000018836	ENSSSCG00000017300	MRC2	chr12:15951694-15978403	1.32686	1.92989	-0.540506	0.005	0.117604	mannose receptor, C type 2 [Source:HGNC Symbol;Acc:HGNC:16875]	--	--	ssc05152,ssc04145	Tuberculosis,Phagosome
ENSSSCT00000029011	ENSSSCG00000022685	ROM1	chr2:8471015-8472803	3.26562	4.68861	-0.521806	0.0244	0.309109	retinal outer segment membrane protein 1 [Source:HGNC Symbol;Acc:HGNC:10254]	--	--	--	--
ENSSSCT00000009063	ENSSSCG00000008275	TTC31	chr3:71880233-71890564	8.61977	6.65529	0.373149	0.0447	0.426386	tetratricopeptide repeat domain 31 [Source:HGNC Symbol;Acc:HGNC:25759]	--	--	--	--
ENSSSCT00000013555	ENSSSCG00000012397	IL2RG	chrX:64673720-64677978	43.3351	33.193	0.384655	0.0186	0.267681	interleukin 2 receptor subunit gamma [Source:HGNC Symbol;Acc:HGNC:6010]	--	--	ssc05162,ssc04144,ssc05321,ssc04060,ssc05340,ssc05166,ssc04630,ssc04151	Measles,Endocytosis,Inflammatory bowel disease (IBD),Cytokine-cytokine receptor interaction,Primary immunodeficiency,HTLV-I infection,Jak-STAT signaling pathway,PI3K-Akt signaling pathway
ENSSSCT00000001275	ENSSSCG00000001177	-	chr7:23180793-23181105	34.7204	62.6687	-0.851964	0.00095	0.0355909	Histone H4 [Source:UniProtKB/Swiss-Prot;Acc:P62802]	GO:0005515,GO:0005622,GO:0043226,GO:0043227,GO:0044424,GO:0005634,GO:0043229,GO:0043231,GO:0005488,GO:0043228,GO:0043232,GO:0051276,GO:0044446,GO:0044464,GO:0005623,GO:0044422,GO:0006259,GO:0005694,GO:1901360,GO:0006325,GO:0046483,GO:0006139,GO:0003674,GO:0034641,GO:0006725,GO:0044699,GO:0006996,GO:0006352,GO:0003676,GO:0006807,GO:0090304,GO:0032991,GO:0005575,GO:0034622,GO:0071840,GO:0071103,GO:…	protein binding,intracellular,organelle,membrane-bounded organelle,intracellular part,nucleus,intracellular organelle,intracellular membrane-bounded organelle,binding,non-membrane-bounded organelle,intracellular non-membrane-bounded organelle,chromosome organization,intracellular organelle part,cell part,cell,organelle part,DNA metabolic process,chromosome,organic cyclic compound metabolic proces…	ssc05203,ssc05322,ssc05034	Viral carcinogenesis,Systemic lupus erythematosus,Alcoholism
ENSSSCT00000004577	ENSSSCG00000004142	CITED2	chr1:28295772-28296594	18.4906	25.0562	-0.438378	0.0123	0.208925	Cbp/p300-interacting transactivator, with Glu/Asp rich carboxy-terminal domain, 2 [Source:HGNC Symbol;Acc:HGNC:1987]	--	--	--	--
ENSSSCT00000004574	ENSSSCG00000004139	ADGRG6	chr1:25290206-25409275	17.6039	13.687	0.36309	0.0163	0.248645	adhesion G protein-coupled receptor G6 [Source:HGNC Symbol;Acc:HGNC:13841]	--	--	--	--
ENSSSCT00000005190	ENSSSCG00000004700	PDIA3	chr1:142615685-142643747	300.001	233.795	0.359723	0.00775	0.157921	protein disulfide isomerase family A member 3 [Source:HGNC Symbol;Acc:HGNC:4606]	GO:0065008,GO:0042592,GO:0048518,GO:2001235,GO:0044424,GO:0006950,GO:2001238,GO:0097190,GO:0005622,GO:0048522,GO:0043231,GO:0043229,GO:0043227,GO:0012501,GO:0045454,GO:0008219,GO:0016265,GO:0005515,GO:0006915,GO:0043226,GO:0005737,GO:0097191,GO:0070161,GO:0005783,GO:0005634,GO:0005925,GO:0044444,GO:2001233,GO:0005912,GO:0005924,GO:0030055,GO:0048584,GO:0034976,GO:0005575,GO:0043067,GO:2001236,GO:…	regulation of biological quality,homeostatic process,positive regulation of biological process,positive regulation of apoptotic signaling pathway,intracellular part,response to stress,positive regulation of extrinsic apoptotic signaling pathway,apoptotic signaling pathway,intracellular,positive regulation of cellular process,intracellular membrane-bounded organelle,intracellular organelle,membran…	ssc04612,ssc04141	Antigen processing and presentation,Protein processing in endoplasmic reticulum
ENSSSCT00000024337	ENSSSCG00000027677	ABI3	chr12:25368697-25383610	20.24	11.845	0.772925	5e-05	0.00318682	ABI family member 3 [Source:HGNC Symbol;Acc:HGNC:29859]	--	--	--	--
ENSSSCT00000007682	ENSSSCG00000007019	GPAT4	chr17:12137572-12157036	44.9115	58.3033	-0.376493	0.0172	0.256664	glycerol-3-phosphate acyltransferase 4 [Source:HGNC Symbol;Acc:HGNC:20880]	--	--	ssc00561,ssc00564,ssc01100	Glycerolipid metabolism,Glycerophospholipid metabolism,Metabolic pathways
ENSSSCT00000022595	ENSSSCG00000003275	-	chr6:53541981-53550066	6.81178	3.20614	1.0872	5e-05	0.00318682	--	--	--	--	--
ENSSSCT00000022593	ENSSSCG00000029763	IFI35	chr12:19999638-20002311	98.9121	80.3075	0.300613	0.0322	0.360761	interferon induced protein 35 [Source:HGNC Symbol;Acc:HGNC:5399]	--	--	--	--
ENSSSCT00000026741	ENSSSCG00000028635	-	chr3:11560410-11617352	4.67727	3.68049	0.345769	0.0483	0.443744	--	--	--	--	--
ENSSSCT00000024075	ENSSSCG00000027918	STAT1	chr15:106888872-106901999	56.1196	22.2155	1.33693	5e-05	0.00318682	-	--	--	--	--
[truncated: 882 more rows]
