# Supplementary material for: The long non-coding RNA LNC_000397 negatively regulates PRRSV replication through induction of interferon-stimulated genes
Source: Virol J. 2022 Mar 5;19:40. doi: 10.1186/s12985-022-01761-x (PMC8897765; doi:10.1186/s12985-022-01761-x)
Supplement: Supplementary file 3 — Additional file 3: Table S2 Lists differently expressed lncRNAs upon GSWW and VR2332 infection compared to Mock infection. [file 12985_2022_1761_MOESM3_ESM.xlsx]

## Sheet: GSWW
transcript_id	gene_id	gene_name	gene_location	GSWW_FPKM	Mock_FPKM	log2(foldchange)	pvalue	qvalue
LNC_000746	XLOC_039000	-	chr3:100640909-100649881	0.545469	0.326143	0.741993	0.00265	0.0762516
ENSSSCT00000034217	ENSSSCG00000008496	EIF2AK2	chr3:109622368-109667785	42.6671	17.135	1.31617	5e-05	0.00318682
ALDBSSCT0000006869	ALDBSSCG0000004185	-	chr3:122754097-122755354	0.198138	0.708895	-1.83906	0.0452	0.428876
LNC_000870	XLOC_044886	-	chr5:30081429-30084993	0.649266	0.168402	1.9469	0.0284	0.336703
ENSSSCT00000035867	ENSSSCG00000007146	SIGLEC1	chr17:36328313-36349591	14.4758	5.5719	1.3774	5e-05	0.00318682
LNC_000245	XLOC_013195	-	chr1:242342179-242357104	4.18603	2.71474	0.624771	0.0026	0.075175
LNC_000618	XLOC_031982	-	chr17:45137026-45142040	0.881474	0.475683	0.889916	0.01705	0.255385
ALDBSSCT0000011925	ALDBSSCG0000007258	-	chrX:47051660-47052166	1.89188	6.61617	-1.80617	0.0182	0.264224
ENSSSCT00000033304	ENSSSCG00000015579	PTGS2	chr9:140251517-140260362	24.5888	19.4981	0.334668	0.01645	0.250109
ALDBSSCT0000008391	ALDBSSCG0000005101	-	chr5:83702687-83703477	1.59777	0.628963	1.34502	0.0065	0.140995
ALDBSSCT0000002539	ALDBSSCG0000001537	-	chr12:62737411-62747740	1.61306	3.13285	-0.957676	0.0339	0.370907
LNC_000058	XLOC_002936	-	GL894031.1:224586-226064	0.174468	0.462819	-1.40748	0.0451	0.428418
ALDBSSCT0000000773	ALDBSSCG0000000466	-	chr1:103294373-103334163	1.04532	1.72165	-0.719845	0.03975	0.402525
ALDBSSCT0000002070	ALDBSSCG0000001246	-	chr11:82951895-82952593	6.50933	9.87489	-0.601256	0.01185	0.204059
ENSSSCT00000016939	ENSSSCG00000015549	RNASEL	chr9:136210072-136224410	9.36493	4.92247	0.927886	5e-05	0.00318682
ALDBSSCT0000007825	ALDBSSCG0000004740	-	chr4:1448001-1450982	1.07449	0.610622	0.8153	0.0374	0.389827
LNC_000840	XLOC_043269	-	chr4:41260050-41295733	0.78788	0.603886	0.3837	0.0189	0.270212
LNC_001003	XLOC_052751	-	chr7:29141230-29149505	0.912543	2.72237	-1.5769	0.0361	0.383161
LNC_001005	XLOC_052975	-	chr7:44876628-44887284	0.87398	0.509239	0.779256	0.0004	0.0182909
ALDBSSCT0000010731	ALDBSSCG0000006492	-	chr8:1457473-1458292	1.31736	0.687667	0.937864	0.04895	0.446511
LNC_000960	XLOC_050519	-	chr6:135715600-135725438	1.23162	0.918491	0.423225	0.0219	0.292912
LNC_000963	XLOC_050846	-	chr7:4523601-4525027	0.692339	0.332697	1.05727	0.0233	0.30122
ENSSSCT00000036566	ENSSSCG00000031014	CU468856.2	chr13:57531866-57533531	0.645694	0.267067	1.27365	0.02935	0.342966
ALDBSSCT0000002761	ALDBSSCG0000001674	-	chr13:111049442-111051195	91.7338	65.2994	0.490384	0.00085	0.0327147
ENSSSCT00000031317	ENSSSCG00000020977	SH3BGRL	chrX:74389846-74404857	5.42343	10.5343	-0.957816	0.0077	0.157216
LNC_000240	XLOC_012666	-	chr1:164856708-164874698	0.847204	0.607921	0.478826	0.0235	0.302646
LNC_000109	XLOC_005472	-	GL895839.1:7272-9277	0.617211	1.39148	-1.17279	0.0149	0.23537
ENSSSCT00000032811	ENSSSCG00000030756	CH242-236H7.3	chrX:6072241-6097234	0.469209	1.1647	-1.31165	0.0198	0.277533
LNC_000822	XLOC_042079	-	chr4:97746889-97749058	0.878198	0.413287	1.0874	0.02315	0.30122
LNC_000224	XLOC_011665	-	chr1:33031441-33069692	0.833293	0.473815	0.8145	0.0068	0.145178
ALDBSSCT0000004736	ALDBSSCG0000002884	-	chr16:29293022-29297134	1.34562	2.5169	-0.903373	0.00985	0.181329
ALDBSSCT0000009564	ALDBSSCG0000005834	-	chr6:148737497-148743720	1.49278	2.83637	-0.926048	0.0142	0.228469
LNC_000469	XLOC_023168	-	chr13:199064138-199074408	2.29898	1.65291	0.475988	0.0106	0.189999
LNC_000071	XLOC_003685	-	GL894475.1:13287-15370	6.83338	5.13394	0.412533	0.03275	0.364124
LNC_000640	XLOC_033047	-	chr18:59858214-59871793	1.16732	0.830266	0.491555	0.00605	0.13428
ALDBSSCT0000008897	ALDBSSCG0000005438	-	chr6:57881481-57884588	1.6166	0.917685	0.816896	0.01875	0.269
ALDBSSCT0000008467	ALDBSSCG0000005144	-	chr5:106499743-106501189	2.61002	1.63294	0.676589	0.0123	0.208925
ALDBSSCT0000011875	ALDBSSCG0000007221	-	JH118841.1:93200-93990	4.51841	2.50768	0.849463	0.0492	0.4477
ALDBSSCT0000002119	ALDBSSCG0000001270	-	chr12:3348817-3351941	1.73995	0.755932	1.20272	0.01915	0.272135
ALDBSSCT0000011407	ALDBSSCG0000006936	-	chr9:3630454-3656750	4.88265	1.67899	1.54007	0.0049	0.115959
ALDBSSCT0000002467	ALDBSSCG0000001492	-	chr12:45987365-45989002	1.72525	0.994988	0.794054	0.0239	0.305587
ALDBSSCT0000000072	ALDBSSCG0000000042	-	chr1:23646292-23678654	2.90696	0	inf	0.00145	0.048842
ALDBSSCT0000003080	ALDBSSCG0000001850	-	chr13:27043723-27046723	1.92552	1.10597	0.799937	0.04615	0.433349
ALDBSSCT0000011316	ALDBSSCG0000006873	-	chr9:128650280-128651905	0.902708	0	inf	5e-05	0.00318682
ALDBSSCT0000002257	ALDBSSCG0000001359	-	chr12:44151632-44153461	1.04811	0.578998	0.856154	0.0105	0.18886
LNC_000164	XLOC_008458	-	JH118940.1:131907-133501	1.57307	2.41728	-0.619801	0.03095	0.353138
LNC_001014	XLOC_054377	-	chr8:32374515-32376586	0.655114	1.09826	-0.745398	0.0179	0.261858
ALDBSSCT0000001303	ALDBSSCG0000000793	-	chr10:63704371-63709406	0.554693	0.325293	0.769951	0.042	0.414455
LNC_000099	XLOC_005174	-	GL895563.1:44491-79350	1.04682	1.77355	-0.760634	0.0171	0.255814
ALDBSSCT0000003424	ALDBSSCG0000002062	-	chr13:213109034-213109780	229.031	297.853	-0.379056	0.0374	0.389827
ALDBSSCT0000003626	ALDBSSCG0000002175	-	chr14:71524075-71530818	1.06025	0.618527	0.777494	0.04525	0.429171
ALDBSSCT0000006156	ALDBSSCG0000003762	-	chr2:6518478-6523495	1.64653	2.66911	-0.696928	0.039	0.398463
ALDBSSCT0000010864	ALDBSSCG0000006581	-	chr8:58014702-58019820	1.79398	1.15732	0.632378	0.01485	0.234902
ENSSSCT00000017310	ENSSSCG00000015897	IFIH1	chr15:76423088-76477401	40.3218	14.4337	1.48212	5e-05	0.00318682
ALDBSSCT0000001886	ALDBSSCG0000001141	-	chr11:6809062-6819486	1.36703	0.928234	0.558482	0.04145	0.411476
ALDBSSCT0000011965	ALDBSSCG0000007282	-	chrX:113105760-113109306	2.06044	1.18961	0.792466	0.03515	0.377866
ALDBSSCT0000002482	ALDBSSCG0000001501	-	chr12:52123886-52125550	18.1482	13.5208	0.424654	0.00715	0.150042
ALDBSSCT0000005899	ALDBSSCG0000003598	-	chr2:59878476-59880756	4.36879	2.62596	0.734392	0.0313	0.35524
LNC_000882	XLOC_045372	-	chr5:83124009-83124620	0	4.76132	#NAME?	5e-05	0.00318682
LNC_001044	XLOC_056026	-	chr8:127590934-127615864	17.6996	13.0405	0.440717	0.00995	0.182499
ALDBSSCT0000006684	ALDBSSCG0000004083	-	chr3:42723325-42735638	0.240875	0.606467	-1.33214	0.02175	0.292175
LNC_000926	XLOC_048144	-	chr6:77482279-77484930	0.969675	0.642826	0.593071	0.0472	0.438563
ALDBSSCT0000008751	ALDBSSCG0000005342	-	chr6:16878685-16954522	0.960779	1.83588	-0.934194	0.012	0.205628
ALDBSSCT0000003842	ALDBSSCG0000002309	-	chr14:30728125-30729184	4.91408	7.1883	-0.548729	0.02245	0.297318
LNC_000393	XLOC_019243	-	chr13:11360277-11373384	1.86465	1.24435	0.58352	0.04015	0.404586
LNC_000397	XLOC_019576	-	chr13:35532440-35541480	0.885412	0.517206	0.775609	0.0006	0.0250653
ALDBSSCT0000002488	ALDBSSCG0000001506	-	chr12:54029278-54030201	0.751855	0.214101	1.81217	0.04225	0.415814
LNC_000450	XLOC_022298	-	chr13:91476524-91478358	0.178259	0.455124	-1.35228	0.04675	0.436493
LNC_000452	XLOC_022364	-	chr13:99711928-99714655	4.51056	2.87379	0.650351	0.0017	0.0549108
LNC_000454	XLOC_022416	-	chr13:105123395-105143869	1.0577	0.699077	0.597402	0.00075	0.0296994
ALDBSSCT0000001685	ALDBSSCG0000001018	-	chr11:8770512-8772099	6.96997	14.3364	-1.04046	0.00575	0.129558
LNC_000111	XLOC_005504	-	GL895864.2:125524-169011	5.31181	3.99248	0.411921	0.02575	0.318611
LNC_000645	XLOC_033198	-	chr18:10563221-10570519	4.03015	5.31276	-0.398628	0.0342	0.372597
ENSSSCT00000018610	ENSSSCG00000017092	GPX3	chr16:78282293-78290916	0.878552	0.524615	0.743867	0.0377	0.391557
LNC_000557	XLOC_029347	-	chr15:153317389-153323701	1.04694	0.70577	0.568915	0.035	0.377155
LNC_000141	XLOC_006697	-	GL896403.2:17295-20484	2.4785	1.78671	0.472167	0.034	0.371481
LNC_001131	XLOC_061432	-	chrX:139014408-139023455	0.871395	0.299132	1.54254	0.04365	0.422244
ALDBSSCT0000002948	ALDBSSCG0000001774	-	chr13:191445217-191557483	0.466847	0.823689	-0.81915	0.0429	0.419102
ALDBSSCT0000006754	ALDBSSCG0000004125	-	chr3:75816621-75883119	1.4679	0.879415	0.739134	0.0292	0.341922
ALDBSSCT0000005474	ALDBSSCG0000003318	-	chr18:18854094-19023635	1.65904	1.15135	0.527018	0.04535	0.429624
ALDBSSCT0000011475	ALDBSSCG0000006983	-	chr9:32373824-32375617	2.94367	1.80849	0.702832	0.00435	0.106781
ALDBSSCT0000011272	ALDBSSCG0000006842	-	chr9:85564708-85595204	2.68372	5.42818	-1.01623	0.00595	0.132748
LNC_000695	XLOC_035991	-	chr2:5927438-5934187	15.6161	7.48051	1.06183	5e-05	0.00318682
LNC_000348	XLOC_016825	-	chr11:73745223-73748756	0.614402	0.334891	0.875491	0.006	0.133501
ALDBSSCT0000001736	ALDBSSCG0000001051	-	chr11:26321258-26323426	6.09342	8.43145	-0.468528	0.04825	0.443523
ALDBSSCT0000011594	ALDBSSCG0000007039	-	chr9:79701693-79714180	35.1799	24.0582	0.548223	0.01615	0.247219
LNC_000611	XLOC_031705	-	chr17:13058087-13060646	0.622703	0.987207	-0.664808	0.02325	0.30122
ALDBSSCT0000009461	ALDBSSCG0000005770	-	chr6:90721671-90724653	3.70026	6.74939	-0.86713	0.03825	0.394671
ALDBSSCT0000011047	ALDBSSCG0000006705	-	chr9:3407677-3416160	64.7144	34.5499	0.905404	5e-05	0.00318682
LNC_000426	XLOC_020674	-	chr13:149169118-149174266	1.90277	1.26385	0.590279	0.02665	0.324932
ALDBSSCT0000001912	ALDBSSCG0000001157	-	chr11:14257313-14259257	1.27873	0.838954	0.608045	0.0393	0.400078
LNC_000172	XLOC_008813	-	chr1:14167183-14169416	0.335665	0.768872	-1.19572	0.02975	0.345579
ALDBSSCT0000004291	ALDBSSCG0000002600	-	chr15:117963935-117965758	9.37198	12.6627	-0.43416	0.0451	0.428418
ALDBSSCT0000004462	ALDBSSCG0000002719	-	chr15:61704908-61705466	1.76684	3.38473	-0.937868	0.04565	0.430953
LNC_000296	XLOC_015610	-	chr10:71359948-71360984	1.02525	0.39208	1.38675	0.0164	0.249672
LNC_000290	XLOC_015473	-	chr10:55989564-55992787	0.268807	0.613012	-1.18934	0.02805	0.334309
ALDBSSCT0000009494	ALDBSSCG0000005790	-	chr6:104324244-104353618	0.98638	1.3031	-0.401731	0.03165	0.357534
LNC_000001	XLOC_000022	-	GL892228.1:21-566	2.10905	3.91203	-0.891324	0.0374	0.389827
LNC_000005	XLOC_000283	-	GL892387.1:709-1724	3.89867	7.65727	-0.973848	0.0172	0.256664
ALDBSSCT0000001555	ALDBSSCG0000000948	-	chr10:63420020-63422944	1.04667	2.51675	-1.26576	0.0441	0.424313
LNC_000129	XLOC_006064	-	GL896222.1:18493-21923	0.460853	0.199913	1.20493	0.0216	0.291885

## Sheet: Sheet2
transcript_id	gene_id	gene_name	VR2332_FPKM	Mock_FPKM	log2(foldchange)	pvalue	qvalue
ALDBSSCT0000010088	ALDBSSCG0000006141	-	3.60205	1.5327	1.23274	0.00735	0.152723
LNC_000747	XLOC_039046	-	3.97782	2.30607	0.786539	5e-05	0.00318682
LNC_000746	XLOC_039000	-	0.595597	0.326143	0.868831	0.0003	0.01456
ENSSSCT00000034217	ENSSSCG00000008496	EIF2AK2	63.8304	17.135	1.89729	5e-05	0.00318682
LNC_001051	XLOC_056832	-	0.413205	0.714801	-0.790683	0.0376	0.391035
ENSSSCT00000035867	ENSSSCG00000007146	SIGLEC1	42.7005	5.5719	2.93801	5e-05	0.00318682
ALDBSSCT0000002317	ALDBSSCG0000001399	-	0.491592	0.187671	1.38925	0.00255	0.0741254
LNC_000244	XLOC_013060	-	0.683699	0.497594	0.458394	0.0407	0.407543
LNC_000245	XLOC_013195	-	6.33068	2.71474	1.22155	5e-05	0.00318682
LNC_000246	XLOC_013195	-	0.623878	0.21576	1.53184	0.02925	0.342259
LNC_000243	XLOC_013048	-	0.540675	0	inf	5e-05	0.00318682
ALDBSSCT0000005310	ALDBSSCG0000003214	-	1.91916	1.04038	0.883362	0.02455	0.3101
ALDBSSCT0000011534	ALDBSSCG0000007004	-	1.19682	0.703597	0.76638	0.0363	0.384261
ALDBSSCT0000007162	ALDBSSCG0000004354	-	0.763412	0.434762	0.812235	0.01275	0.213571
ALDBSSCT0000001353	ALDBSSCG0000000829	-	1.94357	0.317347	2.61458	5e-05	0.00318682
LNC_000618	XLOC_031982	-	1.27455	0.475683	1.42191	0.0001	0.00583627
LNC_000613	XLOC_031813	-	0.46136	0.670379	-0.539082	0.04075	0.407819
ALDBSSCT0000008391	ALDBSSCG0000005101	-	1.24118	0.628963	0.98066	0.0396	0.401766
ALDBSSCT0000002539	ALDBSSCG0000001537	-	1.44289	3.13285	-1.11851	0.0233	0.30122
LNC_001015	XLOC_054391	-	0.187667	0.47058	-1.32627	0.018	0.26252
LNC_000447	XLOC_022201	-	0.722251	1.38233	-0.936531	0.0238	0.304843
ALDBSSCT0000004340	ALDBSSCG0000002627	-	0.720877	0.449264	0.682189	0.048	0.442356
LNC_000058	XLOC_002936	-	0.0916286	0.462819	-2.33658	0.0262	0.32192
LNC_000051	XLOC_002691	-	14.7035	5.77451	1.34839	0.0384	0.395248
LNC_000052	XLOC_002756	-	4.30519	1.3805	1.64089	0.0038	0.09698
ALDBSSCT0000008837	ALDBSSCG0000005399	-	0.543396	1.28991	-1.2472	0.0415	0.411736
ALDBSSCT0000004682	ALDBSSCG0000002851	-	0.535661	0.200623	1.41683	0.0051	0.119294
ALDBSSCT0000001791	ALDBSSCG0000001082	-	1.54627	1.09353	0.499796	0.04825	0.443523
ALDBSSCT0000000773	ALDBSSCG0000000466	-	0.753225	1.72165	-1.19264	0.0024	0.0708868
ALDBSSCT0000007535	ALDBSSCG0000004572	-	1.35469	0.785427	0.786414	0.0001	0.00583627
ALDBSSCT0000000988	ALDBSSCG0000000606	-	11.465	21.4468	-0.903522	0.0237	0.304072
ENSSSCT00000034061	ENSSSCG00000001228	TMP-CH242-74M17.5	0.619823	0.238073	1.38045	0.02015	0.280375
ENSSSCT00000016939	ENSSSCG00000015549	RNASEL	21.533	4.92247	2.1291	5e-05	0.00318682
ALDBSSCT0000009350	ALDBSSCG0000005704	-	4.60555	14.4305	-1.64768	0.0369	0.38707
LNC_000798	XLOC_041351	-	0.888965	0.382135	1.21804	0.00665	0.14322
LNC_000840	XLOC_043269	-	0.967009	0.603886	0.679252	5e-05	0.00318682
ALDBSSCT0000004845	ALDBSSCG0000002941	-	43.7927	66.95	-0.612394	0.00445	0.108492
LNC_000138	XLOC_006503	-	0.672207	0.118332	2.50607	0.00555	0.126483
LNC_001086	XLOC_057781	-	2.63206	3.76096	-0.514911	0.00665	0.14322
LNC_000686	XLOC_035146	-	1.38184	0.953208	0.535727	0.0013	0.0450029
LNC_000353	XLOC_017021	-	0.591365	0.296592	0.995566	0.0158	0.243953
LNC_000350	XLOC_016948	-	0.486624	0.168222	1.53244	0.0001	0.00583627
LNC_000213	XLOC_011452	-	0.337609	0.91367	-1.43632	0.0084	0.165632
LNC_000210	XLOC_011349	-	0.509972	0.364749	0.483512	0.0092	0.174267
LNC_000965	XLOC_050912	-	4.28726	3.16684	0.437013	0.04815	0.443029
LNC_000964	XLOC_050857	-	2.48506	1.49765	0.73058	0.00885	0.170886
LNC_000960	XLOC_050519	-	1.55441	0.918491	0.759028	5e-05	0.00318682
LNC_000963	XLOC_050846	-	0.632383	0.332697	0.926592	0.04445	0.425188
ALDBSSCT0000007945	ALDBSSCG0000004816	-	6.63861	11.1214	-0.744384	0.01635	0.24915
ENSSSCT00000033840	ENSSSCG00000017791	SSH2	8.81973	7.04861	0.323396	0.02295	0.300884
ENSSSCT00000016750	ENSSSCG00000015375	ITGB8	18.1142	12.3992	0.546871	0.0005	0.0217369
ALDBSSCT0000002761	ALDBSSCG0000001674	-	144.697	65.2994	1.14789	5e-05	0.00318682
LNC_000603	XLOC_031372	-	1.63379	1.23034	0.409164	0.0103	0.186537
ALDBSSCT0000011105	ALDBSSCG0000006741	-	20.1056	32.5865	-0.696676	0.02465	0.310813
ALDBSSCT0000003314	ALDBSSCG0000001994	-	1.37993	0.969444	0.509365	0.02105	0.28751
LNC_000092	XLOC_004825	-	3.30215	2.10503	0.649569	0.0392	0.399588
ALDBSSCT0000012083	ALDBSSCG0000007367	-	2.95979	4.64561	-0.65037	0.0491	0.447248
ALDBSSCT0000009583	ALDBSSCG0000005850	-	1.02687	0.510497	1.00828	0.0093	0.175408
LNC_000240	XLOC_012666	-	0.894466	0.607921	0.557144	0.00835	0.164983
LNC_000241	XLOC_012722	-	1.37137	0.873228	0.651189	0.04275	0.41837
LNC_000811	XLOC_041521	-	0.296823	0.760602	-1.35754	0.0463	0.434116
LNC_000812	XLOC_041537	-	3.15806	1.7188	0.87764	0.00055	0.0234187
ALDBSSCT0000007223	ALDBSSCG0000004392	-	0.300426	0.519444	-0.789956	0.0283	0.336002
LNC_000767	XLOC_039811	-	1.02779	0.717195	0.519108	0.0064	0.139488
ALDBSSCT0000001327	ALDBSSCG0000000810	-	113.305	137.516	-0.279391	0.04895	0.446511
LNC_000511	XLOC_025901	-	0.541484	0.140891	1.94234	0.0426	0.417589
LNC_000517	XLOC_026514	-	1.24903	0.825923	0.596734	0.03365	0.369533
ALDBSSCT0000004812	ALDBSSCG0000002924	-	6.44084	9.48006	-0.557648	0.0325	0.362543
LNC_000893	XLOC_046149	-	1.25163	0.876162	0.514536	0.00205	0.0631641
LNC_000895	XLOC_046403	-	0.280682	0.458501	-0.707988	0.023	0.30122
LNC_001073	XLOC_057562	-	0.967151	0.640069	0.595514	0.0024	0.0708868
LNC_001074	XLOC_057584	-	9.70118	2.49694	1.958	5e-05	0.00318682
ALDBSSCT0000008921	ALDBSSCG0000005453	-	26.5266	18.9274	0.486966	0.0059	0.131985
ALDBSSCT0000011717	ALDBSSCG0000007111	-	2.79513	1.79949	0.635331	0.049	0.446724
ALDBSSCT0000003295	ALDBSSCG0000001983	-	2.35995	3.67499	-0.638985	0.04215	0.415309
ALDBSSCT0000004736	ALDBSSCG0000002884	-	1.46172	2.5169	-0.783981	0.021	0.28715
LNC_000598	XLOC_031156	-	3.0027	2.37778	0.336645	0.03205	0.359866
ALDBSSCT0000004622	ALDBSSCG0000002811	-	3.76477	2.61803	0.524079	0.0339	0.370907
LNC_000380	XLOC_018613	-	22.047	13.573	0.699847	0.00065	0.026683
ALDBSSCT0000002510	ALDBSSCG0000001518	-	0.923072	0.424915	1.11927	0.00185	0.0585143
ALDBSSCT0000000928	ALDBSSCG0000000571	-	2.17884	1.05038	1.05265	0.02535	0.315807
ALDBSSCT0000009564	ALDBSSCG0000005834	-	1.17887	2.83637	-1.26665	0.0032	0.0869954
LNC_000469	XLOC_023168	-	2.56417	1.65291	0.633485	0.001	0.0369787
LNC_000461	XLOC_022789	-	0	6.03599	#NAME?	0.00135	0.0463331
ALDBSSCT0000007675	ALDBSSCG0000004661	-	0.864312	0.419137	1.04413	0.0067	0.143937
LNC_000079	XLOC_004170	-	0.965592	0.413423	1.22379	0.0008	0.0312581
ALDBSSCT0000008372	ALDBSSCG0000005084	-	1.24445	2.31392	-0.894834	0.00835	0.164983
LNC_000752	XLOC_039381	-	0.700901	1.06231	-0.599921	0.04505	0.428177
LNC_000751	XLOC_039378	-	2.37277	3.40622	-0.521602	0.0166	0.251453
LNC_000640	XLOC_033047	-	1.5276	0.830266	0.879619	5e-05	0.00318682
ENSSSCT00000035481	ENSSSCG00000030916	CH242-136A20.1	1.74635	1.0058	0.796002	0.01235	0.209439
ALDBSSCT0000008897	ALDBSSCG0000005438	-	1.8867	0.917685	1.03979	0.00285	0.0801538
LNC_000544	XLOC_028404	-	0.733695	0.236781	1.63163	0.0007	0.0281778
ALDBSSCT0000008467	ALDBSSCG0000005144	-	2.86421	1.63294	0.81067	0.00245	0.0719747
ALDBSSCT0000001850	ALDBSSCG0000001115	-	3.94437	6.82886	-0.791848	0.0402	0.404821
LNC_000868	XLOC_044697	-	0.59614	0.242075	1.3002	0.00655	0.141725
ALDBSSCT0000009181	ALDBSSCG0000005593	-	3.20351	5.29895	-0.726054	0.01665	0.251882
ALDBSSCT0000003946	ALDBSSCG0000002377	-	3.54091	1.8728	0.918921	0.0129	0.215141
ALDBSSCT0000007255	ALDBSSCG0000004399	-	0.781095	0.294652	1.40649	5e-05	0.00318682
LNC_001105	XLOC_059324	-	0.478535	0.285194	0.746679	0.01365	0.222991
ALDBSSCT0000011875	ALDBSSCG0000007221	-	7.3186	2.50768	1.54522	0.00135	0.0463331
ALDBSSCT0000011872	ALDBSSCG0000007218	-	3.5314	2.51519	0.489574	0.01395	0.225944
ALDBSSCT0000002115	ALDBSSCG0000001268	-	1.07296	1.60828	-0.583916	0.0204	0.282455
ALDBSSCT0000011407	ALDBSSCG0000006936	-	10.6257	1.67899	2.6619	0.0001	0.00583627
ALDBSSCT0000002467	ALDBSSCG0000001492	-	3.96762	0.994988	1.99552	5e-05	0.00318682
ALDBSSCT0000004351	ALDBSSCG0000002637	-	0.487397	0.797432	-0.710263	0.047	0.437676
ALDBSSCT0000007114	ALDBSSCG0000004330	-	0.232734	0.695843	-1.58008	0.0364	0.38472
LNC_000048	XLOC_002680	-	1.27664	1.85274	-0.537311	0.0429	0.419102
LNC_000667	XLOC_034181	-	0.729666	0.457424	0.673703	0.0044	0.107624
ALDBSSCT0000007504	ALDBSSCG0000004552	-	0.997813	0.407603	1.29161	0.00015	0.0082355
ALDBSSCT0000004737	ALDBSSCG0000002885	-	2.88653	5.57694	-0.95014	0.0148	0.234379
ALDBSSCT0000011315	ALDBSSCG0000006872	-	10.3004	37.9146	-1.88006	0.00675	0.144443
LNC_000254	XLOC_013727	-	0.755287	0.492864	0.615835	0.0489	0.446304
ALDBSSCT0000002257	ALDBSSCG0000001359	-	1.36203	0.578998	1.23412	0.00035	0.0164533
LNC_000107	XLOC_005336	-	0.584424	0.14483	2.01265	0.0255	0.316831
LNC_000162	XLOC_008248	-	0.592011	0.875122	-0.563862	0.0233	0.30122
LNC_000814	XLOC_041609	-	0.600363	0.336781	0.834025	0.03095	0.353138
LNC_001010	XLOC_053919	-	1.454	2.43462	-0.74367	0.0193	0.273318
LNC_001011	XLOC_054166	-	1.0561	0.739667	0.513804	0.03455	0.374629
LNC_001017	XLOC_054492	-	2.37956	1.69901	0.485995	0.00435	0.106781
LNC_001014	XLOC_054377	-	0.654669	1.09826	-0.746379	0.0141	0.227473
ALDBSSCT0000006985	ALDBSSCG0000004240	-	0.500378	0.847817	-0.760734	0.02585	0.319296
ALDBSSCT0000003003	ALDBSSCG0000001800	-	11.5716	8.93361	0.37327	0.01945	0.274666
ALDBSSCT0000004471	ALDBSSCG0000002725	-	7.16404	5.78317	0.308913	0.0409	0.408703
ALDBSSCT0000003424	ALDBSSCG0000002062	-	161.933	297.853	-0.879202	0.0001	0.00583627
LNC_001094	XLOC_058501	-	0.706788	0.495757	0.511643	0.00455	0.110149
LNC_001095	XLOC_058797	-	1.08446	0.58245	0.896766	5e-05	0.00318682
LNC_000328	XLOC_016019	-	0.810724	1.40834	-0.796709	0.0481	0.442751
LNC_000095	XLOC_005040	-	0.461222	0.147034	1.64931	0.00035	0.0164533
ALDBSSCT0000003990	ALDBSSCG0000002401	-	1.3981	2.3044	-0.720928	0.0036	0.0936692
ALDBSSCT0000006156	ALDBSSCG0000003762	-	1.39527	2.66911	-0.935811	0.00915	0.173733
ALDBSSCT0000009973	ALDBSSCG0000006066	-	0.986035	0.35088	1.49066	0.0109	0.19347
ALDBSSCT0000007178	ALDBSSCG0000004363	-	11.0946	7.82495	0.503706	0.0182	0.264224
ENSSSCT00000017310	ENSSSCG00000015897	IFIH1	66.9982	14.4337	2.21468	5e-05	0.00318682
ALDBSSCT0000008879	ALDBSSCG0000005426	-	0.560166	0.254857	1.13617	0.0012	0.0424417
ALDBSSCT0000001886	ALDBSSCG0000001141	-	1.61587	0.928234	0.799751	0.0035	0.0919229
ALDBSSCT0000009397	ALDBSSCG0000005731	-	13.1762	9.71722	0.439323	0.02645	0.32362
ALDBSSCT0000008485	ALDBSSCG0000005159	-	2.45606	4.21892	-0.780531	0.0234	0.301902
LNC_000630	XLOC_032618	-	10.149	6.17709	0.716332	5e-05	0.00318682
LNC_000633	XLOC_032794	-	1.40613	0.595525	1.2395	5e-05	0.00318682
LNC_000191	XLOC_009888	-	0.788051	0.407422	0.951764	0.01505	0.236802
LNC_000405	XLOC_019772	-	0.412121	0.752645	-0.868902	0.02405	0.306565
ALDBSSCT0000002482	ALDBSSCG0000001501	-	23.1844	13.5208	0.777976	5e-05	0.00318682
ALDBSSCT0000009292	ALDBSSCG0000005667	-	0.444152	0.719598	-0.696139	0.0493	0.448121
ALDBSSCT0000009129	ALDBSSCG0000005567	-	0.504596	0.214935	1.23123	0.00205	0.0631641
LNC_000771	XLOC_039942	-	0.667475	0.141281	2.24014	0.00065	0.026683
ALDBSSCT0000006313	ALDBSSCG0000003858	-	0.436033	0.942274	-1.11171	0.01895	0.270411
ALDBSSCT0000010174	ALDBSSCG0000006197	-	27.4804	18.58	0.564654	0.00205	0.0631641
ALDBSSCT0000008938	ALDBSSCG0000005468	-	9.07427	19.3066	-1.08924	0.0434	0.420988
LNC_000317	XLOC_015833	-	0.586875	0.303779	0.95003	0.01845	0.266378
ALDBSSCT0000009211	ALDBSSCG0000005612	-	1.75752	0.625427	1.49062	0.00115	0.0410868
ALDBSSCT0000006106	ALDBSSCG0000003729	-	4.43285	2.49681	0.828147	0.0083	0.164328
ENSSSCT00000033960	ENSSSCG00000016341	TRAF3IP1	1.6732	2.58123	-0.625447	0.0372	0.38871
LNC_000255	XLOC_013729	-	0.85966	0.494458	0.797918	0.00015	0.0082355
ALDBSSCT0000008751	ALDBSSCG0000005342	-	1.07175	1.83588	-0.7765	0.02715	0.328304
ALDBSSCT0000010440	ALDBSSCG0000006345	-	27.8495	16.3323	0.769928	5e-05	0.00318682
LNC_000949	XLOC_049940	-	0.528426	0.305858	0.788842	0.02175	0.292175
LNC_000392	XLOC_019243	-	3.79174	2.72067	0.478899	0.00695	0.147327
LNC_000393	XLOC_019243	-	2.16231	1.24435	0.797184	0.004	0.100586
LNC_000396	XLOC_019491	-	0.702343	0.311306	1.17384	0.0256	0.317564
LNC_000397	XLOC_019576	-	1.22925	0.517206	1.24897	5e-05	0.00318682
ALDBSSCT0000009432	ALDBSSCG0000005754	-	13.8496	9.25218	0.581976	0.00535	0.123235
LNC_000280	XLOC_014862	-	0.837361	0.544654	0.62051	0.0004	0.0182909
LNC_000459	XLOC_022617	-	4.81702	3.24156	0.571452	0.00055	0.0234187
LNC_000451	XLOC_022305	-	0.562205	0.320403	0.811208	0.0082	0.163009
LNC_000453	XLOC_022410	-	2.03235	1.20188	0.757858	0.00085	0.0327147
LNC_000452	XLOC_022364	-	6.63204	2.87379	1.2065	5e-05	0.00318682
LNC_000454	XLOC_022416	-	1.07406	0.699077	0.619548	0.0003	0.01456
ALDBSSCT0000007686	ALDBSSCG0000004666	-	0.585177	1.15091	-0.975833	0.03325	0.367173
LNC_000067	XLOC_003362	-	1.07508	0.640386	0.74743	0.0032	0.0869954
LNC_000111	XLOC_005504	-	6.44337	3.99248	0.690533	0.0002	0.0104635
LNC_000643	XLOC_033148	-	57.9588	31.5487	0.877448	5e-05	0.00318682
LNC_000645	XLOC_033198	-	2.78467	5.31276	-0.931954	5e-05	0.00318682
ALDBSSCT0000011077	ALDBSSCG0000006721	-	7.97022	5.94004	0.424145	0.0107	0.191159
ALDBSSCT0000003519	ALDBSSCG0000002117	-	0.725277	0.361238	1.00558	0.0245	0.309787
ALDBSSCT0000010889	ALDBSSCG0000006596	-	1.11056	3.17804	-1.51685	0.00365	0.0945852
LNC_000554	XLOC_029131	-	0.99886	0.612138	0.706426	0.00755	0.155264
LNC_000555	XLOC_029248	-	0.912482	1.93215	-1.08234	0.0038	0.09698
LNC_000552	XLOC_028912	-	10.4426	14.4087	-0.464465	0.0334	0.368119
LNC_000553	XLOC_029024	-	4.33054	2.39883	0.852217	5e-05	0.00318682
ALDBSSCT0000005768	ALDBSSCG0000003504	-	113.229	172.305	-0.605717	0.04955	0.449169
ALDBSSCT0000011581	ALDBSSCG0000007032	-	20.9984	26.6452	-0.343595	0.01575	0.243532
LNC_000855	XLOC_044171	-	3.19177	0	inf	5e-05	0.00318682
LNC_000854	XLOC_044142	-	4.94331	6.26287	-0.341346	0.03435	0.373483
LNC_000858	XLOC_044260	-	0.587621	0.197061	1.57624	0.0005	0.0217369
LNC_001035	XLOC_055488	-	2.70744	1.88241	0.524349	0.02085	0.285922
ALDBSSCT0000007409	ALDBSSCG0000004489	-	1.24585	1.72658	-0.470789	0.0173	0.257474
ALDBSSCT0000005474	ALDBSSCG0000003318	-	1.85043	1.15135	0.684527	0.0088	0.170324
ALDBSSCT0000011475	ALDBSSCG0000006983	-	4.06999	1.80849	1.17024	5e-05	0.00318682
ALDBSSCT0000000343	ALDBSSCG0000000204	-	3.46979	2.02376	0.777808	0.0002	0.0104635
ALDBSSCT0000003196	ALDBSSCG0000001926	-	0.85858	1.86118	-1.1162	0.0216	0.291885
ALDBSSCT0000005939	ALDBSSCG0000003629	-	25.6112	45.2096	-0.819853	0.0257	0.318259
ENSSSCT00000005081	ENSSSCG00000004600	CH242-58J12.2	19.7642	15.2439	0.374662	0.00815	0.162352
LNC_000690	XLOC_035387	-	1.52707	1.04844	0.542526	0.02095	0.286746
LNC_000695	XLOC_035991	-	10.3164	7.48051	0.463732	0.0019	0.059695
LNC_000345	XLOC_016740	-	0.625143	0.432275	0.532239	0.03465	0.375166
LNC_000346	XLOC_016766	-	0.183486	0.474061	-1.3694	0.03825	0.394671
LNC_000348	XLOC_016825	-	0.893033	0.334891	1.41502	5e-05	0.00318682
ALDBSSCT0000008512	ALDBSSCG0000005177	-	1.28671	0.480008	1.42256	0.0082	0.163009
ALDBSSCT0000000293	ALDBSSCG0000000168	-	26.759	40.7016	-0.605061	0.02445	0.30947
ALDBSSCT0000011594	ALDBSSCG0000007039	-	45.036	24.0582	0.90455	5e-05	0.00318682
LNC_000959	XLOC_050407	-	0.886536	0.126587	2.80805	5e-05	0.00318682
ALDBSSCT0000007957	ALDBSSCG0000004823	-	1.36759	0.910661	0.586646	0.02925	0.342259
ALDBSSCT0000007483	ALDBSSCG0000004537	-	2.56686	1.44183	0.832106	0.00035	0.0164533
ALDBSSCT0000007482	ALDBSSCG0000004536	-	2.9152	1.87365	0.637742	0.00685	0.14586
ALDBSSCT0000012079	ALDBSSCG0000007367	-	8.25738	11.9827	-0.537197	0.00545	0.124826
ALDBSSCT0000009894	ALDBSSCG0000006017	-	0.980311	0.629325	0.639436	0.0278	0.332602
LNC_000615	XLOC_031842	-	0.471947	0.149761	1.65596	0.00255	0.0741254
ALDBSSCT0000007140	ALDBSSCG0000004342	-	0.888147	1.38977	-0.645972	0.03435	0.373483
ALDBSSCT0000011047	ALDBSSCG0000006705	-	124.161	34.5499	1.84546	5e-05	0.00318682
LNC_000792	XLOC_041186	-	0.567565	1.15828	-1.02912	0.01465	0.232919
LNC_000427	XLOC_020717	-	1.60816	1.09551	0.553802	0.0079	0.159812
ALDBSSCT0000007631	ALDBSSCG0000004628	-	30.487	48.7263	-0.676507	0.0348	0.376004
ALDBSSCT0000001912	ALDBSSCG0000001157	-	1.48506	0.838954	0.823857	0.0054	0.124021
ALDBSSCT0000007398	ALDBSSCG0000004485	-	9.26781	13.2785	-0.518794	0.02785	0.332963
ALDBSSCT0000006042	ALDBSSCG0000003698	-	9.33395	2.60691	1.84015	0.0164	0.249672
ALDBSSCT0000006043	ALDBSSCG0000003699	-	5.56997	2.18538	1.34979	0.00225	0.0676241
LNC_000173	XLOC_008989	-	2.31488	3.01235	-0.379953	0.0193	0.273318
LNC_000713	XLOC_037414	-	0.36184	0.640043	-0.822818	0.0297	0.345251
LNC_001141	XLOC_061525	-	0.706605	0.294487	1.2627	0.01085	0.192902
ENSSSCT00000035380	ENSSSCG00000031004	CH242-227G20.3	3.1757	4.7893	-0.592738	0.0051	0.119294
ALDBSSCT0000004462	ALDBSSCG0000002719	-	1.62705	3.38473	-1.05678	0.04355	0.421713
LNC_000505	XLOC_025366	-	0.606556	0.334692	0.857804	0.01865	0.268118
LNC_000501	XLOC_025194	-	0.866007	0.620227	0.481581	0.0322	0.360761
LNC_000088	XLOC_004554	-	2.103	1.05843	0.990523	0.0429	0.419102
LNC_000785	XLOC_040976	-	0.591593	0.304042	0.960334	0.00045	0.0200341
LNC_000782	XLOC_040722	-	0.500063	0.351559	0.508343	0.024	0.306396
LNC_000296	XLOC_015610	-	1.05038	0.39208	1.42169	0.01345	0.220922
LNC_000334	XLOC_016482	-	0.555059	0.326119	0.767243	0.03095	0.353138
LNC_000231	XLOC_012424	-	1.99795	0.871998	1.19612	0.033	0.365683
LNC_000585	XLOC_030143	-	3.68741	2.13171	0.7906	5e-05	0.00318682
ALDBSSCT0000000663	ALDBSSCG0000000398	-	1.07897	0.130814	3.04406	0.0325	0.362543
ALDBSSCT0000005151	ALDBSSCG0000003106	-	16.1231	22.4264	-0.476065	0.01715	0.256208
ALDBSSCT0000010619	ALDBSSCG0000006442	-	0.926448	1.89137	-1.02965	0.01745	0.258563
LNC_000983	XLOC_051890	-	2.75511	1.50017	0.876981	0.0109	0.19347
LNC_000982	XLOC_051866	-	0.899049	0.488058	0.881347	5e-05	0.00318682
ALDBSSCT0000006460	ALDBSSCG0000003940	-	1.72567	1.11461	0.630608	0.0163	0.248645
ALDBSSCT0000007565	ALDBSSCG0000004591	-	0.917447	0.256729	1.83738	0.0485	0.444636
LNC_000124	XLOC_005975	-	0.524751	0.917465	-0.806021	0.02435	0.30874
