# Supplementary material for: The long non-coding RNA LNC_000397 negatively regulates PRRSV replication through induction of interferon-stimulated genes
Source: Virol J. 2022 Mar 5;19:40. doi: 10.1186/s12985-022-01761-x (PMC8897765; doi:10.1186/s12985-022-01761-x)
Supplement: Supplementary file 4 — Additional file 4: Table S3 Lists GO enrichment of up-regulated and down-regulated mRNAs in GSWW and VR2332 infected groups. [file 12985_2022_1761_MOESM4_ESM.xlsx]

## Sheet: GSWW UP
GO_accession	Description	Term_type	Over_represented_pValue	Corrected_pValue	CAD_item	CAD_list	Bg_item	Bg_list	Gene_names	Gene_description
GO:0002252	immune effector process	biological_process	1.1643e-15	4.2634e-12	14	66	93	4727	ENSSSCG00000010831,ENSSSCG00000012077,ENSSSCG00000027982,ENSSSCG00000010451,ENSSSCG00000010453,ENSSSCG00000008648,ENSSSCG00000030548,ENSSSCG00000010454,ENSSSCG00000012076,ENSSSCG00000029531,ENSSSCG00000006495,ENSSSCG00000001912,ENSSSCG00000009882,ENSSSCG00000010452	DUSP10|MX1|ISG15|IFIT2|IFIT1|RSAD2|HERC5|IFIT5|MX2|-|SEMA4A|PML|OAS1|IFIT3|
GO:0009615	response to virus	biological_process	1.1643e-15	4.2634e-12	12	66	41	4727	ENSSSCG00000009882,ENSSSCG00000010452,ENSSSCG00000001912,ENSSSCG00000010454,ENSSSCG00000029531,ENSSSCG00000012076,ENSSSCG00000030548,ENSSSCG00000008648,ENSSSCG00000010453,ENSSSCG00000010451,ENSSSCG00000012077,ENSSSCG00000027982	OAS1|IFIT3|PML|IFIT5|-|MX2|HERC5|RSAD2|IFIT1|IFIT2|MX1|ISG15|
GO:0051607	defense response to virus	biological_process	1.1643e-15	4.2634e-12	12	66	34	4727	ENSSSCG00000010453,ENSSSCG00000008648,ENSSSCG00000010451,ENSSSCG00000027982,ENSSSCG00000012077,ENSSSCG00000009882,ENSSSCG00000010452,ENSSSCG00000001912,ENSSSCG00000010454,ENSSSCG00000012076,ENSSSCG00000029531,ENSSSCG00000030548	IFIT1|RSAD2|IFIT2|ISG15|MX1|OAS1|IFIT3|PML|IFIT5|MX2|-|HERC5|
GO:0002376	immune system process	biological_process	1.1643e-11	3.1975e-08	23	66	322	4727	ENSSSCG00000006495,ENSSSCG00000010454,ENSSSCG00000030548,ENSSSCG00000010452,ENSSSCG00000010991,ENSSSCG00000009882,ENSSSCG00000008796,ENSSSCG00000012077,ENSSSCG00000024996,ENSSSCG00000001341,ENSSSCG00000010453,ENSSSCG00000010451,ENSSSCG00000009542,ENSSSCG00000026362,ENSSSCG00000012076,ENSSSCG00000029531,ENSSSCG00000009997,ENSSSCG00000001912,ENSSSCG00000023868,ENSSSCG00000027982,ENSSSCG00000010831,…	SEMA4A|IFIT5|HERC5|IFIT3|AQP3|OAS1|RBM47|MX1|-|SLA-11|IFIT1|IFIT2|TNFSF13B|HES1|MX2|-|OSM|PML|C3AR1|ISG15|DUSP10|HERC6|RSAD2|
GO:0006955	immune response	biological_process	2.3832e-10	5.2359e-07	17	66	196	4727	ENSSSCG00000010452,ENSSSCG00000009882,ENSSSCG00000006495,ENSSSCG00000010454,ENSSSCG00000030548,ENSSSCG00000001341,ENSSSCG00000010453,ENSSSCG00000010451,ENSSSCG00000009542,ENSSSCG00000012077,ENSSSCG00000024996,ENSSSCG00000009997,ENSSSCG00000001912,ENSSSCG00000029531,ENSSSCG00000008648,ENSSSCG00000027982,ENSSSCG00000010831	IFIT3|OAS1|SEMA4A|IFIT5|HERC5|SLA-11|IFIT1|IFIT2|TNFSF13B|MX1|-|OSM|PML|-|RSAD2|ISG15|DUSP10|
GO:0034340	response to type I interferon	biological_process	6.7145e-10	1.2293e-06	6	66	10	4727	ENSSSCG00000010451,ENSSSCG00000010453,ENSSSCG00000010452,ENSSSCG00000012077,ENSSSCG00000027982,ENSSSCG00000010454	IFIT2|IFIT1|IFIT3|MX1|ISG15|IFIT5|
GO:0051707	response to other organism	biological_process	8.3213e-10	1.3059e-06	14	66	121	4727	ENSSSCG00000010451,ENSSSCG00000010453,ENSSSCG00000008648,ENSSSCG00000010831,ENSSSCG00000012077,ENSSSCG00000027982,ENSSSCG00000001912,ENSSSCG00000010452,ENSSSCG00000009882,ENSSSCG00000030548,ENSSSCG00000012076,ENSSSCG00000008647,ENSSSCG00000010454,ENSSSCG00000029531	IFIT2|IFIT1|RSAD2|DUSP10|MX1|ISG15|PML|IFIT3|OAS1|HERC5|MX2|CMPK2|IFIT5|-|
GO:0045087	innate immune response	biological_process	9.795e-10	1.345e-06	12	66	85	4727	ENSSSCG00000010452,ENSSSCG00000001912,ENSSSCG00000010454,ENSSSCG00000029531,ENSSSCG00000030548,ENSSSCG00000010453,ENSSSCG00000008648,ENSSSCG00000010451,ENSSSCG00000027982,ENSSSCG00000012077,ENSSSCG00000024996,ENSSSCG00000010831	IFIT3|PML|IFIT5|-|HERC5|IFIT1|RSAD2|IFIT2|ISG15|MX1|-|DUSP10|
GO:0009607	response to biotic stimulus	biological_process	1.1744e-09	1.4335e-06	14	66	124	4727	ENSSSCG00000010831,ENSSSCG00000012077,ENSSSCG00000027982,ENSSSCG00000010451,ENSSSCG00000010453,ENSSSCG00000008648,ENSSSCG00000030548,ENSSSCG00000010454,ENSSSCG00000008647,ENSSSCG00000012076,ENSSSCG00000029531,ENSSSCG00000001912,ENSSSCG00000010452,ENSSSCG00000009882	DUSP10|MX1|ISG15|IFIT2|IFIT1|RSAD2|HERC5|IFIT5|CMPK2|MX2|-|PML|IFIT3|OAS1|
GO:0048525	negative regulation of viral process	biological_process	1.751e-09	1.9235e-06	6	66	10	4727	ENSSSCG00000001912,ENSSSCG00000010453,ENSSSCG00000008648,ENSSSCG00000009882,ENSSSCG00000012077,ENSSSCG00000027982	PML|IFIT1|RSAD2|OAS1|MX1|ISG15|
GO:0045071	negative regulation of viral genome replication	biological_process	2.4157e-09	2.4124e-06	5	66	6	4727	ENSSSCG00000027982,ENSSSCG00000012077,ENSSSCG00000010453,ENSSSCG00000008648,ENSSSCG00000009882	ISG15|MX1|IFIT1|RSAD2|OAS1|
GO:0043901	negative regulation of multi-organism process	biological_process	1.2126e-08	1.1101e-05	6	66	13	4727	ENSSSCG00000001912,ENSSSCG00000009882,ENSSSCG00000008648,ENSSSCG00000010453,ENSSSCG00000027982,ENSSSCG00000012077	PML|OAS1|RSAD2|IFIT1|ISG15|MX1|
GO:0006952	defense response	biological_process	2.3591e-08	1.9935e-05	15	66	184	4727	ENSSSCG00000001912,ENSSSCG00000010452,ENSSSCG00000009882,ENSSSCG00000011951,ENSSSCG00000030548,ENSSSCG00000010454,ENSSSCG00000029531,ENSSSCG00000012076,ENSSSCG00000010451,ENSSSCG00000008648,ENSSSCG00000010453,ENSSSCG00000024996,ENSSSCG00000010831,ENSSSCG00000027982,ENSSSCG00000012077	PML|IFIT3|OAS1|NFKBIZ|HERC5|IFIT5|-|MX2|IFIT2|RSAD2|IFIT1|-|DUSP10|ISG15|MX1|
GO:0071357	cellular response to type I interferon	biological_process	4.2531e-08	3.3372e-05	5	66	9	4727	ENSSSCG00000010454,ENSSSCG00000012077,ENSSSCG00000010452,ENSSSCG00000010453,ENSSSCG00000010451	IFIT5|MX1|IFIT3|IFIT1|IFIT2|
GO:0010033	response to organic substance	biological_process	7.5833e-08	5.4702e-05	19	66	318	4727	ENSSSCG00000010454,ENSSSCG00000010452,ENSSSCG00000010991,ENSSSCG00000009882,ENSSSCG00000024996,ENSSSCG00000016520,ENSSSCG00000012077,ENSSSCG00000010451,ENSSSCG00000026383,ENSSSCG00000010453,ENSSSCG00000015074,ENSSSCG00000028326,ENSSSCG00000008647,ENSSSCG00000012076,ENSSSCG00000001912,ENSSSCG00000005724,ENSSSCG00000009997,ENSSSCG00000010831,ENSSSCG00000027982	IFIT5|IFIT3|AQP3|OAS1|-|CREB3L2|MX1|IFIT2|NRP2|IFIT1|SIDT2|NR4A1|CMPK2|MX2|PML|SETX|OSM|DUSP10|ISG15|
GO:0034097	response to cytokine stimulus	biological_process	7.9675e-08	5.4702e-05	11	66	99	4727	ENSSSCG00000010451,ENSSSCG00000010453,ENSSSCG00000024996,ENSSSCG00000027982,ENSSSCG00000012077,ENSSSCG00000001912,ENSSSCG00000009997,ENSSSCG00000009882,ENSSSCG00000010452,ENSSSCG00000010454,ENSSSCG00000012076	IFIT2|IFIT1|-|ISG15|MX1|PML|OSM|OAS1|IFIT3|IFIT5|MX2|
GO:0051704	multi-organism process	biological_process	9.4344e-08	6.0963e-05	14	66	173	4727	ENSSSCG00000008647,ENSSSCG00000010454,ENSSSCG00000012076,ENSSSCG00000029531,ENSSSCG00000030548,ENSSSCG00000010452,ENSSSCG00000009882,ENSSSCG00000001912,ENSSSCG00000012077,ENSSSCG00000027982,ENSSSCG00000010831,ENSSSCG00000008648,ENSSSCG00000010453,ENSSSCG00000010451	CMPK2|IFIT5|MX2|-|HERC5|IFIT3|OAS1|PML|MX1|ISG15|DUSP10|RSAD2|IFIT1|IFIT2|
GO:0035455	response to interferon-alpha	biological_process	1.0952e-07	6.6838e-05	4	66	5	4727	ENSSSCG00000010451,ENSSSCG00000009882,ENSSSCG00000010452,ENSSSCG00000012076	IFIT2|OAS1|IFIT3|MX2|
GO:0045069	regulation of viral genome replication	biological_process	3.8103e-07	0.00022029	5	66	12	4727	ENSSSCG00000008648,ENSSSCG00000010453,ENSSSCG00000009882,ENSSSCG00000012077,ENSSSCG00000027982	RSAD2|IFIT1|OAS1|MX1|ISG15|
GO:0019079	viral genome replication	biological_process	5.658e-07	0.00031077	5	66	13	4727	ENSSSCG00000027982,ENSSSCG00000012077,ENSSSCG00000009882,ENSSSCG00000008648,ENSSSCG00000010453	ISG15|MX1|OAS1|RSAD2|IFIT1|
GO:0050792	regulation of viral process	biological_process	7.4996e-07	0.0003923	6	66	23	4727	ENSSSCG00000008648,ENSSSCG00000009882,ENSSSCG00000010453,ENSSSCG00000001912,ENSSSCG00000027982,ENSSSCG00000012077	RSAD2|OAS1|IFIT1|PML|ISG15|MX1|
GO:0060337	type I interferon-mediated signaling pathway	biological_process	1.638e-06	0.00081789	4	66	8	4727	ENSSSCG00000010451,ENSSSCG00000010452,ENSSSCG00000010453,ENSSSCG00000010454	IFIT2|IFIT3|IFIT1|IFIT5|
GO:0035457	cellular response to interferon-alpha	biological_process	1.8042e-06	0.00086172	3	66	3	4727	ENSSSCG00000010451,ENSSSCG00000009882,ENSSSCG00000010452	IFIT2|OAS1|IFIT3|
GO:0019058	viral infectious cycle	biological_process	1.9435e-06	0.00088957	6	66	29	4727	ENSSSCG00000027982,ENSSSCG00000012077,ENSSSCG00000008648,ENSSSCG00000010453,ENSSSCG00000009882,ENSSSCG00000001912	ISG15|MX1|RSAD2|IFIT1|OAS1|PML|
GO:0006950	response to stress	biological_process	2.1334e-06	0.00093743	21	66	476	4727	ENSSSCG00000010831,ENSSSCG00000006289,ENSSSCG00000027982,ENSSSCG00000008648,ENSSSCG00000029531,ENSSSCG00000012076,ENSSSCG00000001912,ENSSSCG00000011951,ENSSSCG00000005724,ENSSSCG00000009997,ENSSSCG00000024996,ENSSSCG00000016520,ENSSSCG00000012077,ENSSSCG00000010451,ENSSSCG00000010453,ENSSSCG00000030548,ENSSSCG00000013835,ENSSSCG00000010454,ENSSSCG00000001050,ENSSSCG00000010452,ENSSSCG00000009882	DUSP10|F5|ISG15|RSAD2|-|MX2|PML|NFKBIZ|SETX|OSM|-|CREB3L2|MX1|IFIT2|IFIT1|HERC5|CASP14|IFIT5|EDN1|IFIT3|OAS1|
GO:0043903	regulation of symbiosis, encompassing mutualism through parasitism	biological_process	2.4663e-06	0.001042	6	66	28	4727	ENSSSCG00000027982,ENSSSCG00000012077,ENSSSCG00000008648,ENSSSCG00000009882,ENSSSCG00000010453,ENSSSCG00000001912	ISG15|MX1|RSAD2|OAS1|IFIT1|PML|
GO:0071310	cellular response to organic substance	biological_process	4.1911e-06	0.0017051	15	66	262	4727	ENSSSCG00000016520,ENSSSCG00000012077,ENSSSCG00000024996,ENSSSCG00000010453,ENSSSCG00000010451,ENSSSCG00000026383,ENSSSCG00000008647,ENSSSCG00000028326,ENSSSCG00000010454,ENSSSCG00000015074,ENSSSCG00000010452,ENSSSCG00000005724,ENSSSCG00000009882,ENSSSCG00000009997,ENSSSCG00000001912	CREB3L2|MX1|-|IFIT1|IFIT2|NRP2|CMPK2|NR4A1|IFIT5|SIDT2|IFIT3|SETX|OAS1|OSM|PML|
GO:0071526	semaphorin-plexin signaling pathway	biological_process	4.8865e-06	0.0019171	4	66	9	4727	ENSSSCG00000026383,ENSSSCG00000026412,ENSSSCG00000015621,ENSSSCG00000006495	NRP2|-|PLXNA2|SEMA4A|
GO:0043900	regulation of multi-organism process	biological_process	9.6798e-06	0.0036666	7	66	50	4727	ENSSSCG00000012077,ENSSSCG00000027982,ENSSSCG00000030548,ENSSSCG00000008648,ENSSSCG00000010453,ENSSSCG00000009882,ENSSSCG00000001912	MX1|ISG15|HERC5|RSAD2|IFIT1|OAS1|PML|
GO:0002682	regulation of immune system process	biological_process	1.1565e-05	0.0042093	11	66	161	4727	ENSSSCG00000010991,ENSSSCG00000001912,ENSSSCG00000023868,ENSSSCG00000026362,ENSSSCG00000029531,ENSSSCG00000030548,ENSSSCG00000010453,ENSSSCG00000008648,ENSSSCG00000027982,ENSSSCG00000010831,ENSSSCG00000024996	AQP3|PML|C3AR1|HES1|-|HERC5|IFIT1|RSAD2|ISG15|DUSP10|-|
GO:0050896	response to stimulus	biological_process	1.2245e-05	0.0042093	39	66	1649	4727	ENSSSCG00000010453,ENSSSCG00000001341,ENSSSCG00000012077,ENSSSCG00000001050,ENSSSCG00000009882,ENSSSCG00000015621,ENSSSCG00000010991,ENSSSCG00000010452,ENSSSCG00000010454,ENSSSCG00000006495,ENSSSCG00000013835,ENSSSCG00000008648,ENSSSCG00000016925,ENSSSCG00000011951,ENSSSCG00000005724,ENSSSCG00000009997,ENSSSCG00000029531,ENSSSCG00000028326,ENSSSCG00000000623,ENSSSCG00000016057,ENSSSCG00000009542,…	IFIT1|SLA-11|MX1|EDN1|OAS1|PLXNA2|AQP3|IFIT3|IFIT5|SEMA4A|CASP14|RSAD2|PLK2|NFKBIZ|SETX|OSM|-|NR4A1|BCL2L14|STAT1|TNFSF13B|NRP2|IFIT2|DIRAS3|-|CREB3L2|RALGDS|HERC5|-|CBLB|F5|DUSP10|ISG15|PML|C3AR1|SIDT2|CMPK2|MX2|HES1|
GO:0070887	cellular response to chemical stimulus	biological_process	1.2262e-05	0.0042093	16	66	324	4727	ENSSSCG00000009997,ENSSSCG00000005724,ENSSSCG00000001912,ENSSSCG00000023868,ENSSSCG00000028326,ENSSSCG00000008647,ENSSSCG00000015074,ENSSSCG00000010453,ENSSSCG00000010451,ENSSSCG00000026383,ENSSSCG00000016520,ENSSSCG00000012077,ENSSSCG00000024996,ENSSSCG00000010452,ENSSSCG00000009882,ENSSSCG00000010454	OSM|SETX|PML|C3AR1|NR4A1|CMPK2|SIDT2|IFIT1|IFIT2|NRP2|CREB3L2|MX1|-|IFIT3|OAS1|IFIT5|
GO:0005829	cytosol	cellular_component	1.4174e-05	0.0047181	13	66	231	4727	ENSSSCG00000027219,ENSSSCG00000000623,ENSSSCG00000010454,ENSSSCG00000008647,ENSSSCG00000001912,ENSSSCG00000005738,ENSSSCG00000001050,ENSSSCG00000023868,ENSSSCG00000010452,ENSSSCG00000012077,ENSSSCG00000010451,ENSSSCG00000024398,ENSSSCG00000010453	AKAP7|BCL2L14|IFIT5|CMPK2|PML|RALGDS|EDN1|C3AR1|IFIT3|MX1|IFIT2|-|IFIT1|
GO:0016032	viral process	biological_process	2.0015e-05	0.0062817	6	66	42	4727	ENSSSCG00000008648,ENSSSCG00000009882,ENSSSCG00000010453,ENSSSCG00000001912,ENSSSCG00000012077,ENSSSCG00000027982	RSAD2|OAS1|IFIT1|PML|MX1|ISG15|
GO:0044764	multi-organism cellular process	biological_process	2.0015e-05	0.0062817	6	66	42	4727	ENSSSCG00000001912,ENSSSCG00000010453,ENSSSCG00000008648,ENSSSCG00000009882,ENSSSCG00000012077,ENSSSCG00000027982	PML|IFIT1|RSAD2|OAS1|MX1|ISG15|
GO:0071345	cellular response to cytokine stimulus	biological_process	2.5816e-05	0.0078774	8	66	88	4727	ENSSSCG00000012077,ENSSSCG00000010453,ENSSSCG00000010451,ENSSSCG00000010454,ENSSSCG00000010452,ENSSSCG00000009882,ENSSSCG00000009997,ENSSSCG00000001912	MX1|IFIT1|IFIT2|IFIT5|IFIT3|OAS1|OSM|PML|
GO:0014032	neural crest cell development	biological_process	3.6672e-05	0.010888	4	66	15	4727	ENSSSCG00000026383,ENSSSCG00000001050,ENSSSCG00000006495,ENSSSCG00000026362	NRP2|EDN1|SEMA4A|HES1|
GO:0048846	axon extension involved in axon guidance	biological_process	4.8796e-05	0.013744	3	66	5	4727	ENSSSCG00000026383,ENSSSCG00000026412,ENSSSCG00000006495	NRP2|-|SEMA4A|
GO:1902284	neuron projection extension involved in neuron projection guidance	biological_process	4.8796e-05	0.013744	3	66	5	4727	ENSSSCG00000006495,ENSSSCG00000026412,ENSSSCG00000026383	SEMA4A|-|NRP2|
GO:0014033	neural crest cell differentiation	biological_process	5.2148e-05	0.014321	4	66	16	4727	ENSSSCG00000026362,ENSSSCG00000006495,ENSSSCG00000001050,ENSSSCG00000026383	HES1|SEMA4A|EDN1|NRP2|
GO:0042221	response to chemical stimulus	biological_process	5.3721e-05	0.014393	22	66	781	4727	ENSSSCG00000008647,ENSSSCG00000028326,ENSSSCG00000012076,ENSSSCG00000015074,ENSSSCG00000009997,ENSSSCG00000005724,ENSSSCG00000001912,ENSSSCG00000023868,ENSSSCG00000027982,ENSSSCG00000010831,ENSSSCG00000026412,ENSSSCG00000010454,ENSSSCG00000006495,ENSSSCG00000010991,ENSSSCG00000009882,ENSSSCG00000010452,ENSSSCG00000012077,ENSSSCG00000016520,ENSSSCG00000024996,ENSSSCG00000010453,ENSSSCG00000026383,…	CMPK2|NR4A1|MX2|SIDT2|OSM|SETX|PML|C3AR1|ISG15|DUSP10|-|IFIT5|SEMA4A|AQP3|OAS1|IFIT3|MX1|CREB3L2|-|IFIT1|NRP2|IFIT2|
GO:0044403	symbiosis, encompassing mutualism through parasitism	biological_process	5.65e-05	0.014434	6	66	50	4727	ENSSSCG00000012077,ENSSSCG00000027982,ENSSSCG00000001912,ENSSSCG00000008648,ENSSSCG00000009882,ENSSSCG00000010453	MX1|ISG15|PML|RSAD2|OAS1|IFIT1|
GO:0044419	interspecies interaction between organisms	biological_process	5.65e-05	0.014434	6	66	50	4727	ENSSSCG00000012077,ENSSSCG00000027982,ENSSSCG00000001912,ENSSSCG00000008648,ENSSSCG00000010453,ENSSSCG00000009882	MX1|ISG15|PML|RSAD2|IFIT1|OAS1|
GO:0017154	semaphorin receptor activity	molecular_function	8.5807e-05	0.021423	3	66	7	4727	ENSSSCG00000015621,ENSSSCG00000026412,ENSSSCG00000026383	PLXNA2|-|NRP2|
GO:0005737	cytoplasm	cellular_component	9.3944e-05	0.022933	37	66	1478	4727	ENSSSCG00000002538,ENSSSCG00000022912,ENSSSCG00000030548,ENSSSCG00000009806,ENSSSCG00000005738,ENSSSCG00000016520,ENSSSCG00000024996,ENSSSCG00000009542,ENSSSCG00000024398,ENSSSCG00000010451,ENSSSCG00000008647,ENSSSCG00000026362,ENSSSCG00000015074,ENSSSCG00000015525,ENSSSCG00000023868,ENSSSCG00000001912,ENSSSCG00000006289,ENSSSCG00000010831,ENSSSCG00000022486,ENSSSCG00000010454,ENSSSCG00000013835,…	DYNC1H1|NT5C3A|HERC5|SETD1B|RALGDS|CREB3L2|-|TNFSF13B|-|IFIT2|CMPK2|HES1|SIDT2|TOR3A|C3AR1|PML|F5|DUSP10|CBLB|IFIT5|CASP14|AKAP7|OAS1|AQP3|IFIT3|EDN1|MX1|IFIT1|NR4A1|STAT1|BCL2L14|SAMD9|SETX|EVL|PLK2|HERC6|RSAD2|
GO:0032020	ISG15-protein conjugation	biological_process	0.00015572	0.037186	2	66	2	4727	ENSSSCG00000030548,ENSSSCG00000027982	HERC5|ISG15|
GO:0021783	preganglionic parasympathetic nervous system development	biological_process	0.00018073	0.041361	2	66	2	4727	ENSSSCG00000026383,ENSSSCG00000026362	NRP2|HES1|
GO:0048486	parasympathetic nervous system development	biological_process	0.00018073	0.041361	2	66	2	4727	ENSSSCG00000026383,ENSSSCG00000026362	NRP2|HES1|
GO:0031347	regulation of defense response	biological_process	0.00018881	0.042328	7	66	81	4727	ENSSSCG00000008648,ENSSSCG00000010453,ENSSSCG00000001912,ENSSSCG00000029531,ENSSSCG00000010831,ENSSSCG00000024996,ENSSSCG00000030548	RSAD2|IFIT1|PML|-|DUSP10|-|HERC5|
GO:0030097	hemopoiesis	biological_process	0.00025829	0.056746	7	66	88	4727	ENSSSCG00000021712,ENSSSCG00000008648,ENSSSCG00000001912,ENSSSCG00000008796,ENSSSCG00000006495,ENSSSCG00000026362,ENSSSCG00000027982	HERC6|RSAD2|PML|RBM47|SEMA4A|HES1|ISG15|
GO:0009200	deoxyribonucleoside triphosphate metabolic process	biological_process	0.00028386	0.061142	2	66	2	4727	ENSSSCG00000029531,ENSSSCG00000008647	-|CMPK2|
GO:1902285	semaphorin-plexin signaling pathway involved in neuron projection guidance	biological_process	0.00030669	0.064787	2	66	2	4727	ENSSSCG00000026412,ENSSSCG00000026383	-|NRP2|
GO:0048534	hematopoietic or lymphoid organ development	biological_process	0.00042089	0.087236	7	66	95	4727	ENSSSCG00000008648,ENSSSCG00000021712,ENSSSCG00000001912,ENSSSCG00000008796,ENSSSCG00000026362,ENSSSCG00000006495,ENSSSCG00000027982	RSAD2|HERC6|PML|RBM47|HES1|SEMA4A|ISG15|
GO:0048514	blood vessel morphogenesis	biological_process	0.00053825	0.10949	6	66	69	4727	ENSSSCG00000026362,ENSSSCG00000006495,ENSSSCG00000001050,ENSSSCG00000001912,ENSSSCG00000023868,ENSSSCG00000026383	HES1|SEMA4A|EDN1|PML|C3AR1|NRP2|
GO:0009262	deoxyribonucleotide metabolic process	biological_process	0.0006277	0.12097	2	66	3	4727	ENSSSCG00000029531,ENSSSCG00000008647	-|CMPK2|
GO:0009394	2'-deoxyribonucleotide metabolic process	biological_process	0.0006277	0.12097	2	66	3	4727	ENSSSCG00000008647,ENSSSCG00000029531	CMPK2|-|
GO:0019692	deoxyribose phosphate metabolic process	biological_process	0.0006277	0.12097	2	66	3	4727	ENSSSCG00000008647,ENSSSCG00000029531	CMPK2|-|
GO:0002697	regulation of immune effector process	biological_process	0.00064554	0.12226	5	66	47	4727	ENSSSCG00000010831,ENSSSCG00000030548,ENSSSCG00000010453,ENSSSCG00000008648,ENSSSCG00000001912	DUSP10|HERC5|IFIT1|RSAD2|PML|
GO:0002520	immune system development	biological_process	0.00073404	0.13667	7	66	104	4727	ENSSSCG00000006495,ENSSSCG00000026362,ENSSSCG00000027982,ENSSSCG00000021712,ENSSSCG00000008648,ENSSSCG00000001912,ENSSSCG00000008796	SEMA4A|HES1|ISG15|HERC6|RSAD2|PML|RBM47|
GO:0014031	mesenchymal cell development	biological_process	0.00075654	0.13851	4	66	30	4727	ENSSSCG00000006495,ENSSSCG00000026362,ENSSSCG00000001050,ENSSSCG00000026383	SEMA4A|HES1|EDN1|NRP2|
GO:0045088	regulation of innate immune response	biological_process	0.00091146	0.16414	4	66	29	4727	ENSSSCG00000008648,ENSSSCG00000024996,ENSSSCG00000010831,ENSSSCG00000029531	RSAD2|-|DUSP10|-|
GO:0048762	mesenchymal cell differentiation	biological_process	0.0011799	0.20906	4	66	33	4727	ENSSSCG00000001050,ENSSSCG00000026383,ENSSSCG00000006495,ENSSSCG00000026362	EDN1|NRP2|SEMA4A|HES1|
GO:0048583	regulation of response to stimulus	biological_process	0.0012983	0.22495	16	66	480	4727	ENSSSCG00000008648,ENSSSCG00000026412,ENSSSCG00000016925,ENSSSCG00000010831,ENSSSCG00000009997,ENSSSCG00000023868,ENSSSCG00000001912,ENSSSCG00000029531,ENSSSCG00000026362,ENSSSCG00000000623,ENSSSCG00000015074,ENSSSCG00000010453,ENSSSCG00000024996,ENSSSCG00000001050,ENSSSCG00000006495,ENSSSCG00000030548	RSAD2|-|PLK2|DUSP10|OSM|C3AR1|PML|-|HES1|BCL2L14|SIDT2|IFIT1|-|EDN1|SEMA4A|HERC5|
GO:0048675	axon extension	biological_process	0.0013106	0.22495	3	66	15	4727	ENSSSCG00000006495,ENSSSCG00000026412,ENSSSCG00000026383	SEMA4A|-|NRP2|
GO:0048841	regulation of axon extension involved in axon guidance	biological_process	0.0017282	0.28927	2	66	4	4727	ENSSSCG00000006495,ENSSSCG00000026412	SEMA4A|-|
GO:0060284	regulation of cell development	biological_process	0.0017409	0.28927	7	66	121	4727	ENSSSCG00000010831,ENSSSCG00000006495,ENSSSCG00000026362,ENSSSCG00000001912,ENSSSCG00000001050,ENSSSCG00000026412,ENSSSCG00000005724	DUSP10|SEMA4A|HES1|PML|EDN1|-|SETX|
GO:0001525	angiogenesis	biological_process	0.0017643	0.28927	5	66	58	4727	ENSSSCG00000006495,ENSSSCG00000001912,ENSSSCG00000001050,ENSSSCG00000023868,ENSSSCG00000026383	SEMA4A|PML|EDN1|C3AR1|NRP2|
GO:1990138	neuron projection extension	biological_process	0.0018431	0.29774	3	66	17	4727	ENSSSCG00000026412,ENSSSCG00000026383,ENSSSCG00000006495	-|NRP2|SEMA4A|
GO:0001568	blood vessel development	biological_process	0.0019608	0.31217	6	66	87	4727	ENSSSCG00000001912,ENSSSCG00000023868,ENSSSCG00000001050,ENSSSCG00000026383,ENSSSCG00000006495,ENSSSCG00000026362	PML|C3AR1|EDN1|NRP2|SEMA4A|HES1|
GO:0048523	negative regulation of cellular process	biological_process	0.0022485	0.35286	17	66	559	4727	ENSSSCG00000006495,ENSSSCG00000010452,ENSSSCG00000009882,ENSSSCG00000001050,ENSSSCG00000012077,ENSSSCG00000010453,ENSSSCG00000026362,ENSSSCG00000028326,ENSSSCG00000009997,ENSSSCG00000005724,ENSSSCG00000022916,ENSSSCG00000001912,ENSSSCG00000027982,ENSSSCG00000016925,ENSSSCG00000021725,ENSSSCG00000010831,ENSSSCG00000008648	SEMA4A|IFIT3|OAS1|EDN1|MX1|IFIT1|HES1|NR4A1|OSM|SETX|EVL|PML|ISG15|PLK2|PDS5B|DUSP10|RSAD2|
GO:0044766	multi-organism transport	biological_process	0.0023185	0.35382	2	66	5	4727	ENSSSCG00000010453,ENSSSCG00000012077	IFIT1|MX1|
GO:0001944	vasculature development	biological_process	0.0023191	0.35382	6	66	90	4727	ENSSSCG00000006495,ENSSSCG00000026362,ENSSSCG00000026383,ENSSSCG00000023868,ENSSSCG00000001912,ENSSSCG00000001050	SEMA4A|HES1|NRP2|C3AR1|PML|EDN1|
GO:0001667	ameboidal cell migration	biological_process	0.0023782	0.35787	4	66	38	4727	ENSSSCG00000006495,ENSSSCG00000026383,ENSSSCG00000022916,ENSSSCG00000001912	SEMA4A|NRP2|EVL|PML|
GO:0016567	protein ubiquitination	biological_process	0.0024185	0.35902	7	66	121	4727	ENSSSCG00000001912,ENSSSCG00000017146,ENSSSCG00000021712,ENSSSCG00000022486,ENSSSCG00000017148,ENSSSCG00000030548,ENSSSCG00000027982	PML|RNF213|HERC6|CBLB|-|HERC5|ISG15|
GO:0042981	regulation of apoptotic process	biological_process	0.002534	0.36618	9	66	200	4727	ENSSSCG00000010451,ENSSSCG00000016925,ENSSSCG00000001912,ENSSSCG00000009997,ENSSSCG00000005724,ENSSSCG00000010452,ENSSSCG00000028326,ENSSSCG00000000623,ENSSSCG00000013835	IFIT2|PLK2|PML|OSM|SETX|IFIT3|NR4A1|BCL2L14|CASP14|
GO:0048731	system development	biological_process	0.0025814	0.36618	18	66	616	4727	ENSSSCG00000008648,ENSSSCG00000021712,ENSSSCG00000026412,ENSSSCG00000027982,ENSSSCG00000010831,ENSSSCG00000009997,ENSSSCG00000005724,ENSSSCG00000001912,ENSSSCG00000023868,ENSSSCG00000026362,ENSSSCG00000028326,ENSSSCG00000015074,ENSSSCG00000026383,ENSSSCG00000016520,ENSSSCG00000010991,ENSSSCG00000001050,ENSSSCG00000008796,ENSSSCG00000006495	RSAD2|HERC6|-|ISG15|DUSP10|OSM|SETX|PML|C3AR1|HES1|NR4A1|SIDT2|NRP2|CREB3L2|AQP3|EDN1|RBM47|SEMA4A|
GO:0051716	cellular response to stimulus	biological_process	0.0027135	0.36618	30	66	1441	4727	ENSSSCG00000023868,ENSSSCG00000001912,ENSSSCG00000005724,ENSSSCG00000009997,ENSSSCG00000015074,ENSSSCG00000000623,ENSSSCG00000016057,ENSSSCG00000026362,ENSSSCG00000008647,ENSSSCG00000028326,ENSSSCG00000026412,ENSSSCG00000008648,ENSSSCG00000022486,ENSSSCG00000010831,ENSSSCG00000016925,ENSSSCG00000005738,ENSSSCG00000001050,ENSSSCG00000010452,ENSSSCG00000009882,ENSSSCG00000015621,ENSSSCG00000006495,…	C3AR1|PML|SETX|OSM|SIDT2|BCL2L14|STAT1|HES1|CMPK2|NR4A1|-|RSAD2|CBLB|DUSP10|PLK2|RALGDS|EDN1|IFIT3|OAS1|PLXNA2|SEMA4A|CASP14|IFIT5|IFIT2|NRP2|IFIT1|-|DIRAS3|CREB3L2|MX1|
GO:0002244	hematopoietic progenitor cell differentiation	biological_process	0.0027339	0.36618	3	66	19	4727	ENSSSCG00000008796,ENSSSCG00000021712,ENSSSCG00000026362	RBM47|HERC6|HES1|
GO:0043067	regulation of programmed cell death	biological_process	0.002736	0.36618	9	66	202	4727	ENSSSCG00000016925,ENSSSCG00000010451,ENSSSCG00000028326,ENSSSCG00000000623,ENSSSCG00000013835,ENSSSCG00000001912,ENSSSCG00000009997,ENSSSCG00000005724,ENSSSCG00000010452	PLK2|IFIT2|NR4A1|BCL2L14|CASP14|PML|OSM|SETX|IFIT3|
GO:0032446	protein modification by small protein conjugation	biological_process	0.0027583	0.36618	7	66	125	4727	ENSSSCG00000017148,ENSSSCG00000030548,ENSSSCG00000027982,ENSSSCG00000001912,ENSSSCG00000021712,ENSSSCG00000022486,ENSSSCG00000017146	-|HERC5|ISG15|PML|HERC6|CBLB|RNF213|
GO:0080134	regulation of response to stress	biological_process	0.0027628	0.36618	8	66	160	4727	ENSSSCG00000010831,ENSSSCG00000024996,ENSSSCG00000008648,ENSSSCG00000010453,ENSSSCG00000029531,ENSSSCG00000030548,ENSSSCG00000001050,ENSSSCG00000001912	DUSP10|-|RSAD2|IFIT1|-|HERC5|EDN1|PML|
GO:0016477	cell migration	biological_process	0.0027637	0.36618	8	66	167	4727	ENSSSCG00000026362,ENSSSCG00000006495,ENSSSCG00000001912,ENSSSCG00000022916,ENSSSCG00000023868,ENSSSCG00000001050,ENSSSCG00000026412,ENSSSCG00000026383	HES1|SEMA4A|PML|EVL|C3AR1|EDN1|-|NRP2|
GO:0060485	mesenchyme development	biological_process	0.0027667	0.36618	4	66	41	4727	ENSSSCG00000026383,ENSSSCG00000001050,ENSSSCG00000026362,ENSSSCG00000006495	NRP2|EDN1|HES1|SEMA4A|
GO:2001235	positive regulation of apoptotic signaling pathway	biological_process	0.0028883	0.37772	3	66	20	4727	ENSSSCG00000000623,ENSSSCG00000001912,ENSSSCG00000009997	BCL2L14|PML|OSM|
GO:0021545	cranial nerve development	biological_process	0.0029944	0.38698	2	66	7	4727	ENSSSCG00000026362,ENSSSCG00000026383	HES1|NRP2|
GO:0019221	cytokine-mediated signaling pathway	biological_process	0.0032304	0.41263	5	66	73	4727	ENSSSCG00000010451,ENSSSCG00000009997,ENSSSCG00000010453,ENSSSCG00000010452,ENSSSCG00000010454	IFIT2|OSM|IFIT1|IFIT3|IFIT5|
GO:0050919	negative chemotaxis	biological_process	0.0033588	0.4241	2	66	6	4727	ENSSSCG00000006495,ENSSSCG00000026383	SEMA4A|NRP2|
GO:0048864	stem cell development	biological_process	0.0034235	0.42735	4	66	45	4727	ENSSSCG00000026362,ENSSSCG00000006495,ENSSSCG00000001050,ENSSSCG00000026383	HES1|SEMA4A|EDN1|NRP2|
GO:0008361	regulation of cell size	biological_process	0.0035315	0.43352	3	66	20	4727	ENSSSCG00000001050,ENSSSCG00000026412,ENSSSCG00000006495	EDN1|-|SEMA4A|
GO:0048588	developmental cell growth	biological_process	0.0035518	0.43352	3	66	21	4727	ENSSSCG00000026383,ENSSSCG00000026412,ENSSSCG00000006495	NRP2|-|SEMA4A|
GO:0048483	autonomic nervous system development	biological_process	0.0036085	0.4356	2	66	7	4727	ENSSSCG00000026362,ENSSSCG00000026383	HES1|NRP2|
GO:0050688	regulation of defense response to virus	biological_process	0.0038711	0.45607	3	66	20	4727	ENSSSCG00000030548,ENSSSCG00000001912,ENSSSCG00000010453	HERC5|PML|IFIT1|
GO:0051726	regulation of cell cycle	biological_process	0.0039281	0.45607	7	66	140	4727	ENSSSCG00000026362,ENSSSCG00000012076,ENSSSCG00000028326,ENSSSCG00000016925,ENSSSCG00000009997,ENSSSCG00000001912,ENSSSCG00000001050	HES1|MX2|NR4A1|PLK2|OSM|PML|EDN1|
GO:0050920	regulation of chemotaxis	biological_process	0.0039484	0.45607	3	66	24	4727	ENSSSCG00000006495,ENSSSCG00000023868,ENSSSCG00000026412	SEMA4A|C3AR1|-|
GO:0048878	chemical homeostasis	biological_process	0.0040198	0.45607	7	66	139	4727	ENSSSCG00000010453,ENSSSCG00000010991,ENSSSCG00000009882,ENSSSCG00000001050,ENSSSCG00000001912,ENSSSCG00000023868,ENSSSCG00000015074	IFIT1|AQP3|OAS1|EDN1|PML|C3AR1|SIDT2|
GO:0004842	ubiquitin-protein ligase activity	molecular_function	0.0040472	0.45607	5	66	67	4727	ENSSSCG00000022486,ENSSSCG00000021712,ENSSSCG00000017146,ENSSSCG00000030548,ENSSSCG00000017148	CBLB|HERC6|RNF213|HERC5|-|
GO:0048870	cell motility	biological_process	0.0040687	0.45607	8	66	178	4727	ENSSSCG00000022916,ENSSSCG00000001912,ENSSSCG00000001050,ENSSSCG00000023868,ENSSSCG00000026362,ENSSSCG00000006495,ENSSSCG00000026383,ENSSSCG00000026412	EVL|PML|EDN1|C3AR1|HES1|SEMA4A|NRP2|-|
GO:0051674	localization of cell	biological_process	0.0040687	0.45607	8	66	178	4727	ENSSSCG00000001912,ENSSSCG00000022916,ENSSSCG00000001050,ENSSSCG00000023868,ENSSSCG00000026362,ENSSSCG00000006495,ENSSSCG00000026383,ENSSSCG00000026412	PML|EVL|EDN1|C3AR1|HES1|SEMA4A|NRP2|-|
GO:0010941	regulation of cell death	biological_process	0.0041374	0.45908	9	66	216	4727	ENSSSCG00000013835,ENSSSCG00000000623,ENSSSCG00000028326,ENSSSCG00000010452,ENSSSCG00000005724,ENSSSCG00000009997,ENSSSCG00000001912,ENSSSCG00000016925,ENSSSCG00000010451	CASP14|BCL2L14|NR4A1|IFIT3|SETX|OSM|PML|PLK2|IFIT2|
GO:0016049	cell growth	biological_process	0.0042543	0.46734	4	66	45	4727	ENSSSCG00000026383,ENSSSCG00000001912,ENSSSCG00000026412,ENSSSCG00000006495	NRP2|PML|-|SEMA4A|
GO:0005515	protein binding	molecular_function	0.0043328	0.47124	45	66	2329	4727	ENSSSCG00000027219,ENSSSCG00000013835,ENSSSCG00000027580,ENSSSCG00000006495,ENSSSCG00000010454,ENSSSCG00000001050,ENSSSCG00000008796,ENSSSCG00000010452,ENSSSCG00000015621,ENSSSCG00000009882,ENSSSCG00000012077,ENSSSCG00000001341,ENSSSCG00000010453,ENSSSCG00000000623,ENSSSCG00000028326,ENSSSCG00000022916,ENSSSCG00000011951,ENSSSCG00000009997,ENSSSCG00000027372,ENSSSCG00000005724,ENSSSCG00000021725,…	AKAP7|CASP14|-|SEMA4A|IFIT5|EDN1|RBM47|IFIT3|PLXNA2|OAS1|MX1|SLA-11|IFIT1|BCL2L14|NR4A1|EVL|NFKBIZ|OSM|SAMD9|SETX|PDS5B|PLK2|-|AP1S3|CPNE9|RSAD2|HERC5|SETD1B|DYNC1H1|RALGDS|-|DIRAS3|IFIT2|NRP2|TNFSF13B|HES1|MX2|PML|TOR3A|RNF213|F5|ISG15|-|CBLB|SRRM2|
GO:0007165	signal transduction	biological_process	0.0045172	0.48649	26	66	1251	4727	ENSSSCG00000005738,ENSSSCG00000001050,ENSSSCG00000015621,ENSSSCG00000010452,ENSSSCG00000010454,ENSSSCG00000006495,ENSSSCG00000013835,ENSSSCG00000026383,ENSSSCG00000010451,ENSSSCG00000010453,ENSSSCG00000003797,ENSSSCG00000024996,ENSSSCG00000016520,ENSSSCG00000001912,ENSSSCG00000023868,ENSSSCG00000005724,ENSSSCG00000009997,ENSSSCG00000028326,ENSSSCG00000000623,ENSSSCG00000016057,ENSSSCG00000026362,…	RALGDS|EDN1|PLXNA2|IFIT3|IFIT5|SEMA4A|CASP14|NRP2|IFIT2|IFIT1|DIRAS3|-|CREB3L2|PML|C3AR1|SETX|OSM|NR4A1|BCL2L14|STAT1|HES1|-|RSAD2|CBLB|PLK2|DUSP10|
GO:0048519	negative regulation of biological process	biological_process	0.0046201	0.49274	17	66	599	4727	ENSSSCG00000008648,ENSSSCG00000027982,ENSSSCG00000010831,ENSSSCG00000016925,ENSSSCG00000021725,ENSSSCG00000009997,ENSSSCG00000005724,ENSSSCG00000022916,ENSSSCG00000001912,ENSSSCG00000026362,ENSSSCG00000028326,ENSSSCG00000010453,ENSSSCG00000012077,ENSSSCG00000010452,ENSSSCG00000009882,ENSSSCG00000001050,ENSSSCG00000006495	RSAD2|ISG15|DUSP10|PLK2|PDS5B|OSM|SETX|EVL|PML|HES1|NR4A1|IFIT1|MX1|IFIT3|OAS1|EDN1|SEMA4A|
GO:0030154	cell differentiation	biological_process	0.0046908	0.49483	15	66	501	4727	ENSSSCG00000027982,ENSSSCG00000016520,ENSSSCG00000010831,ENSSSCG00000008648,ENSSSCG00000021712,ENSSSCG00000026383,ENSSSCG00000026412,ENSSSCG00000028326,ENSSSCG00000006495,ENSSSCG00000026362,ENSSSCG00000015074,ENSSSCG00000005724,ENSSSCG00000008796,ENSSSCG00000001050,ENSSSCG00000001912	ISG15|CREB3L2|DUSP10|RSAD2|HERC6|NRP2|-|NR4A1|SEMA4A|HES1|SIDT2|SETX|RBM47|EDN1|PML|
GO:0007049	cell cycle	biological_process	0.0047493	0.49483	9	66	221	4727	ENSSSCG00000009997,ENSSSCG00000001050,ENSSSCG00000001912,ENSSSCG00000002538,ENSSSCG00000028326,ENSSSCG00000012076,ENSSSCG00000026362,ENSSSCG00000016925,ENSSSCG00000021725	OSM|EDN1|PML|DYNC1H1|NR4A1|MX2|HES1|PLK2|PDS5B|
GO:0048513	organ development	biological_process	0.0047749	0.49483	14	66	449	4727	ENSSSCG00000008648,ENSSSCG00000021712,ENSSSCG00000026412,ENSSSCG00000026383,ENSSSCG00000016520,ENSSSCG00000027982,ENSSSCG00000010991,ENSSSCG00000001912,ENSSSCG00000001050,ENSSSCG00000008796,ENSSSCG00000026362,ENSSSCG00000006495,ENSSSCG00000028326,ENSSSCG00000015074	RSAD2|HERC6|-|NRP2|CREB3L2|ISG15|AQP3|PML|EDN1|RBM47|HES1|SEMA4A|NR4A1|SIDT2|
GO:0008285	negative regulation of cell proliferation	biological_process	0.0048672	0.49968	5	66	78	4727	ENSSSCG00000001912,ENSSSCG00000009997,ENSSSCG00000010452,ENSSSCG00000021725,ENSSSCG00000026362	PML|OSM|IFIT3|PDS5B|HES1|
GO:0032879	regulation of localization	biological_process	0.0051275	0.52097	11	66	314	4727	ENSSSCG00000012077,ENSSSCG00000008648,ENSSSCG00000026412,ENSSSCG00000006495,ENSSSCG00000012076,ENSSSCG00000015074,ENSSSCG00000009997,ENSSSCG00000001050,ENSSSCG00000001912,ENSSSCG00000022916,ENSSSCG00000023868	MX1|RSAD2|-|SEMA4A|MX2|SIDT2|OSM|EDN1|PML|EVL|C3AR1|
GO:0003723	RNA binding	molecular_function	0.0051694	0.52097	7	66	151	4727	ENSSSCG00000010451,ENSSSCG00000024398,ENSSSCG00000008796,ENSSSCG00000010452,ENSSSCG00000010453,ENSSSCG00000009882,ENSSSCG00000010454	IFIT2|-|RBM47|IFIT3|IFIT1|OAS1|IFIT5|
GO:0048584	positive regulation of response to stimulus	biological_process	0.0052197	0.52125	9	66	230	4727	ENSSSCG00000000623,ENSSSCG00000026362,ENSSSCG00000001050,ENSSSCG00000001912,ENSSSCG00000023868,ENSSSCG00000009997,ENSSSCG00000024996,ENSSSCG00000016925,ENSSSCG00000008648	BCL2L14|HES1|EDN1|PML|C3AR1|OSM|-|PLK2|RSAD2|
GO:0007275	multicellular organismal development	biological_process	0.0053612	0.53056	18	66	657	4727	ENSSSCG00000001050,ENSSSCG00000008796,ENSSSCG00000010991,ENSSSCG00000006495,ENSSSCG00000026383,ENSSSCG00000016520,ENSSSCG00000001912,ENSSSCG00000023868,ENSSSCG00000009997,ENSSSCG00000005724,ENSSSCG00000015074,ENSSSCG00000026362,ENSSSCG00000028326,ENSSSCG00000026412,ENSSSCG00000008648,ENSSSCG00000021712,ENSSSCG00000010831,ENSSSCG00000027982	EDN1|RBM47|AQP3|SEMA4A|NRP2|CREB3L2|PML|C3AR1|OSM|SETX|SIDT2|HES1|NR4A1|-|RSAD2|HERC6|DUSP10|ISG15|
GO:0050795	regulation of behavior	biological_process	0.0055998	0.54194	3	66	28	4727	ENSSSCG00000006495,ENSSSCG00000026412,ENSSSCG00000023868	SEMA4A|-|C3AR1|
GO:0032535	regulation of cellular component size	biological_process	0.0057496	0.54194	4	66	48	4727	ENSSSCG00000006495,ENSSSCG00000026412,ENSSSCG00000022916,ENSSSCG00000001050	SEMA4A|-|EVL|EDN1|
GO:0051239	regulation of multicellular organismal process	biological_process	0.0057826	0.54194	12	66	364	4727	ENSSSCG00000027982,ENSSSCG00000016925,ENSSSCG00000010831,ENSSSCG00000008648,ENSSSCG00000026412,ENSSSCG00000026362,ENSSSCG00000006495,ENSSSCG00000005724,ENSSSCG00000022916,ENSSSCG00000001912,ENSSSCG00000001050,ENSSSCG00000023868	ISG15|PLK2|DUSP10|RSAD2|-|HES1|SEMA4A|SETX|EVL|PML|EDN1|C3AR1|
GO:0019787	small conjugating protein ligase activity	molecular_function	0.005876	0.54194	5	66	73	4727	ENSSSCG00000017148,ENSSSCG00000030548,ENSSSCG00000021712,ENSSSCG00000022486,ENSSSCG00000017146	-|HERC5|HERC6|CBLB|RNF213|
GO:0043367	CD4-positive, alpha-beta T cell differentiation	biological_process	0.0060563	0.54194	2	66	8	4727	ENSSSCG00000008648,ENSSSCG00000006495	RSAD2|SEMA4A|
GO:0051048	negative regulation of secretion	biological_process	0.0060794	0.54194	3	66	25	4727	ENSSSCG00000008648,ENSSSCG00000009997,ENSSSCG00000001912	RSAD2|OSM|PML|
GO:0006915	apoptotic process	biological_process	0.0062629	0.54194	9	66	232	4727	ENSSSCG00000013835,ENSSSCG00000000623,ENSSSCG00000028326,ENSSSCG00000010452,ENSSSCG00000009997,ENSSSCG00000005724,ENSSSCG00000001912,ENSSSCG00000016925,ENSSSCG00000010451	CASP14|BCL2L14|NR4A1|IFIT3|OSM|SETX|PML|PLK2|IFIT2|
GO:0006928	cellular component movement	biological_process	0.0062929	0.54194	9	66	232	4727	ENSSSCG00000022916,ENSSSCG00000001912,ENSSSCG00000001050,ENSSSCG00000023868,ENSSSCG00000006495,ENSSSCG00000026362,ENSSSCG00000002538,ENSSSCG00000026412,ENSSSCG00000026383	EVL|PML|EDN1|C3AR1|SEMA4A|HES1|DYNC1H1|-|NRP2|
GO:0035883	enteroendocrine cell differentiation	biological_process	0.0063895	0.54194	2	66	8	4727	ENSSSCG00000015074,ENSSSCG00000026362	SIDT2|HES1|
GO:0045444	fat cell differentiation	biological_process	0.006495	0.54194	3	66	28	4727	ENSSSCG00000026362,ENSSSCG00000028326,ENSSSCG00000010831	HES1|NR4A1|DUSP10|
GO:0055082	cellular chemical homeostasis	biological_process	0.0065086	0.54194	5	66	81	4727	ENSSSCG00000015074,ENSSSCG00000010991,ENSSSCG00000001912,ENSSSCG00000001050,ENSSSCG00000023868	SIDT2|AQP3|PML|EDN1|C3AR1|
GO:0007243	intracellular protein kinase cascade	biological_process	0.0066422	0.54194	7	66	152	4727	ENSSSCG00000001050,ENSSSCG00000009997,ENSSSCG00000005724,ENSSSCG00000010831,ENSSSCG00000024996,ENSSSCG00000016925,ENSSSCG00000026362	EDN1|OSM|SETX|DUSP10|-|PLK2|HES1|
GO:0007204	elevation of cytosolic calcium ion concentration	biological_process	0.0067404	0.54194	3	66	26	4727	ENSSSCG00000023868,ENSSSCG00000001912,ENSSSCG00000001050	C3AR1|PML|EDN1|
GO:0044700	single organism signaling	biological_process	0.0067795	0.54194	27	66	1338	4727	ENSSSCG00000005724,ENSSSCG00000009997,ENSSSCG00000023868,ENSSSCG00000001912,ENSSSCG00000016057,ENSSSCG00000000623,ENSSSCG00000026362,ENSSSCG00000028326,ENSSSCG00000015074,ENSSSCG00000022486,ENSSSCG00000008648,ENSSSCG00000026412,ENSSSCG00000010831,ENSSSCG00000016925,ENSSSCG00000010452,ENSSSCG00000015621,ENSSSCG00000005738,ENSSSCG00000001050,ENSSSCG00000006495,ENSSSCG00000013835,ENSSSCG00000010454,…	SETX|OSM|C3AR1|PML|STAT1|BCL2L14|HES1|NR4A1|SIDT2|CBLB|RSAD2|-|DUSP10|PLK2|IFIT3|PLXNA2|RALGDS|EDN1|SEMA4A|CASP14|IFIT5|IFIT1|IFIT2|NRP2|CREB3L2|-|DIRAS3|
GO:0023052	signaling	biological_process	0.0068329	0.54194	27	66	1339	4727	ENSSSCG00000003797,ENSSSCG00000024996,ENSSSCG00000016520,ENSSSCG00000026383,ENSSSCG00000010451,ENSSSCG00000010453,ENSSSCG00000010454,ENSSSCG00000013835,ENSSSCG00000006495,ENSSSCG00000001050,ENSSSCG00000005738,ENSSSCG00000015621,ENSSSCG00000010452,ENSSSCG00000016925,ENSSSCG00000010831,ENSSSCG00000026412,ENSSSCG00000008648,ENSSSCG00000022486,ENSSSCG00000015074,ENSSSCG00000028326,ENSSSCG00000000623,…	DIRAS3|-|CREB3L2|NRP2|IFIT2|IFIT1|IFIT5|CASP14|SEMA4A|EDN1|RALGDS|PLXNA2|IFIT3|PLK2|DUSP10|-|RSAD2|CBLB|SIDT2|NR4A1|BCL2L14|STAT1|HES1|C3AR1|PML|SETX|OSM|
GO:0046883	regulation of hormone secretion	biological_process	0.0070652	0.54194	3	66	30	4727	ENSSSCG00000009997,ENSSSCG00000001050,ENSSSCG00000015074	OSM|EDN1|SIDT2|
GO:0035710	CD4-positive, alpha-beta T cell activation	biological_process	0.0071729	0.54194	2	66	9	4727	ENSSSCG00000006495,ENSSSCG00000008648	SEMA4A|RSAD2|
GO:0035924	cellular response to vascular endothelial growth factor stimulus	biological_process	0.0071897	0.54194	2	66	9	4727	ENSSSCG00000024996,ENSSSCG00000026383	-|NRP2|
GO:0070647	protein modification by small protein conjugation or removal	biological_process	0.0072096	0.54194	7	66	148	4727	ENSSSCG00000001912,ENSSSCG00000017146,ENSSSCG00000022486,ENSSSCG00000021712,ENSSSCG00000017148,ENSSSCG00000030548,ENSSSCG00000027982	PML|RNF213|CBLB|HERC6|-|HERC5|ISG15|
GO:0030334	regulation of cell migration	biological_process	0.0073204	0.54194	5	66	85	4727	ENSSSCG00000022916,ENSSSCG00000023868,ENSSSCG00000026412,ENSSSCG00000001050,ENSSSCG00000006495	EVL|C3AR1|-|EDN1|SEMA4A|
GO:0012501	programmed cell death	biological_process	0.0073347	0.54194	9	66	238	4727	ENSSSCG00000010451,ENSSSCG00000016925,ENSSSCG00000001912,ENSSSCG00000010452,ENSSSCG00000009997,ENSSSCG00000005724,ENSSSCG00000013835,ENSSSCG00000000623,ENSSSCG00000028326	IFIT2|PLK2|PML|IFIT3|OSM|SETX|CASP14|BCL2L14|NR4A1|
GO:0001755	neural crest cell migration	biological_process	0.0073592	0.54194	2	66	9	4727	ENSSSCG00000026383,ENSSSCG00000006495	NRP2|SEMA4A|
GO:0042503	tyrosine phosphorylation of Stat3 protein	biological_process	0.0074431	0.54194	2	66	10	4727	ENSSSCG00000009997,ENSSSCG00000026362	OSM|HES1|
GO:0042516	regulation of tyrosine phosphorylation of Stat3 protein	biological_process	0.0074431	0.54194	2	66	10	4727	ENSSSCG00000026362,ENSSSCG00000009997	HES1|OSM|
GO:0042517	positive regulation of tyrosine phosphorylation of Stat3 protein	biological_process	0.0074431	0.54194	2	66	10	4727	ENSSSCG00000009997,ENSSSCG00000026362	OSM|HES1|
GO:0045595	regulation of cell differentiation	biological_process	0.007521	0.54194	8	66	201	4727	ENSSSCG00000005724,ENSSSCG00000001912,ENSSSCG00000001050,ENSSSCG00000006495,ENSSSCG00000026362,ENSSSCG00000026412,ENSSSCG00000027982,ENSSSCG00000010831	SETX|PML|EDN1|SEMA4A|HES1|-|ISG15|DUSP10|
GO:0042886	amide transport	biological_process	0.0076127	0.54194	3	66	30	4727	ENSSSCG00000010991,ENSSSCG00000001050,ENSSSCG00000015074	AQP3|EDN1|SIDT2|
GO:0044424	intracellular part	cellular_component	0.0076434	0.54194	43	66	2227	4727	ENSSSCG00000016925,ENSSSCG00000021725,ENSSSCG00000008648,ENSSSCG00000021712,ENSSSCG00000000623,ENSSSCG00000016057,ENSSSCG00000029531,ENSSSCG00000028326,ENSSSCG00000022916,ENSSSCG00000011951,ENSSSCG00000027372,ENSSSCG00000005724,ENSSSCG00000012077,ENSSSCG00000010453,ENSSSCG00000027219,ENSSSCG00000013835,ENSSSCG00000010454,ENSSSCG00000001050,ENSSSCG00000008796,ENSSSCG00000010452,ENSSSCG00000010991,…	PLK2|PDS5B|RSAD2|HERC6|BCL2L14|STAT1|-|NR4A1|EVL|NFKBIZ|SAMD9|SETX|MX1|IFIT1|AKAP7|CASP14|IFIT5|EDN1|RBM47|IFIT3|AQP3|OAS1|DUSP10|F5|SRRM2|CBLB|SIDT2|HES1|MX2|CMPK2|PML|C3AR1|TOR3A|-|CREB3L2|IFIT2|-|TNFSF13B|SETD1B|HERC5|NT5C3A|DYNC1H1|RALGDS|
GO:0031018	endocrine pancreas development	biological_process	0.007664	0.54194	2	66	9	4727	ENSSSCG00000026362,ENSSSCG00000015074	HES1|SIDT2|
GO:0007411	axon guidance	biological_process	0.0077676	0.54194	3	66	27	4727	ENSSSCG00000026412,ENSSSCG00000026383,ENSSSCG00000006495	-|NRP2|SEMA4A|
GO:0097485	neuron projection guidance	biological_process	0.0077676	0.54194	3	66	27	4727	ENSSSCG00000026383,ENSSSCG00000026412,ENSSSCG00000006495	NRP2|-|SEMA4A|
GO:2001238	positive regulation of extrinsic apoptotic signaling pathway	biological_process	0.0079924	0.54194	2	66	9	4727	ENSSSCG00000000623,ENSSSCG00000001912	BCL2L14|PML|
GO:0007154	cell communication	biological_process	0.0080274	0.54194	27	66	1351	4727	ENSSSCG00000010454,ENSSSCG00000006495,ENSSSCG00000013835,ENSSSCG00000015621,ENSSSCG00000010452,ENSSSCG00000001050,ENSSSCG00000005738,ENSSSCG00000016520,ENSSSCG00000003797,ENSSSCG00000024996,ENSSSCG00000010453,ENSSSCG00000026383,ENSSSCG00000010451,ENSSSCG00000028326,ENSSSCG00000016057,ENSSSCG00000026362,ENSSSCG00000000623,ENSSSCG00000015074,ENSSSCG00000009997,ENSSSCG00000005724,ENSSSCG00000001912,…	IFIT5|SEMA4A|CASP14|PLXNA2|IFIT3|EDN1|RALGDS|CREB3L2|DIRAS3|-|IFIT1|NRP2|IFIT2|NR4A1|STAT1|HES1|BCL2L14|SIDT2|OSM|SETX|PML|C3AR1|PLK2|DUSP10|CBLB|RSAD2|-|
GO:0007610	behavior	biological_process	0.0081365	0.54194	5	66	87	4727	ENSSSCG00000009997,ENSSSCG00000026412,ENSSSCG00000023868,ENSSSCG00000006495,ENSSSCG00000016925	OSM|-|C3AR1|SEMA4A|PLK2|
GO:0048863	stem cell differentiation	biological_process	0.0081628	0.54194	4	66	58	4727	ENSSSCG00000026362,ENSSSCG00000006495,ENSSSCG00000001050,ENSSSCG00000026383	HES1|SEMA4A|EDN1|NRP2|
GO:0016881	acid-amino acid ligase activity	molecular_function	0.0083686	0.54194	5	66	79	4727	ENSSSCG00000017146,ENSSSCG00000022486,ENSSSCG00000021712,ENSSSCG00000030548,ENSSSCG00000017148	RNF213|CBLB|HERC6|HERC5|-|
GO:0004942	anaphylatoxin receptor activity	molecular_function	0.0083893	0.54194	1	66	1	4727	ENSSSCG00000023868	C3AR1|
GO:0004943	C3a anaphylatoxin receptor activity	molecular_function	0.0083893	0.54194	1	66	1	4727	ENSSSCG00000023868	C3AR1|
GO:0010758	regulation of macrophage chemotaxis	biological_process	0.0083893	0.54194	1	66	1	4727	ENSSSCG00000023868	C3AR1|
GO:0010759	positive regulation of macrophage chemotaxis	biological_process	0.0083893	0.54194	1	66	1	4727	ENSSSCG00000023868	C3AR1|
GO:0071674	mononuclear cell migration	biological_process	0.0083893	0.54194	1	66	1	4727	ENSSSCG00000023868	C3AR1|
GO:0071675	regulation of mononuclear cell migration	biological_process	0.0083893	0.54194	1	66	1	4727	ENSSSCG00000023868	C3AR1|
GO:0019067	viral assembly, maturation, egress, and release	biological_process	0.0085826	0.54194	2	66	11	4727	ENSSSCG00000001912,ENSSSCG00000012077	PML|MX1|
GO:0043435	response to corticotropin-releasing hormone stimulus	biological_process	0.0086981	0.54194	1	66	1	4727	ENSSSCG00000028326	NR4A1|
GO:0071376	cellular response to corticotropin-releasing hormone stimulus	biological_process	0.0086981	0.54194	1	66	1	4727	ENSSSCG00000028326	NR4A1|
GO:0007166	cell surface receptor signaling pathway	biological_process	0.008767	0.54194	18	66	864	4727	ENSSSCG00000023868,ENSSSCG00000001912,ENSSSCG00000009997,ENSSSCG00000005724,ENSSSCG00000026362,ENSSSCG00000000623,ENSSSCG00000026412,ENSSSCG00000022486,ENSSSCG00000001050,ENSSSCG00000010452,ENSSSCG00000015621,ENSSSCG00000013835,ENSSSCG00000006495,ENSSSCG00000010454,ENSSSCG00000010451,ENSSSCG00000026383,ENSSSCG00000010453,ENSSSCG00000024996	C3AR1|PML|OSM|SETX|HES1|BCL2L14|-|CBLB|EDN1|IFIT3|PLXNA2|CASP14|SEMA4A|IFIT5|IFIT2|NRP2|IFIT1|-|
GO:0005635	nuclear envelope	cellular_component	0.0088224	0.54194	4	66	55	4727	ENSSSCG00000001912,ENSSSCG00000028326,ENSSSCG00000012076,ENSSSCG00000012077	PML|NR4A1|MX2|MX1|
GO:0016525	negative regulation of angiogenesis	biological_process	0.0088507	0.54194	2	66	10	4727	ENSSSCG00000001912,ENSSSCG00000006495	PML|SEMA4A|
GO:0002831	regulation of response to biotic stimulus	biological_process	0.0089516	0.54194	3	66	27	4727	ENSSSCG00000030548,ENSSSCG00000001912,ENSSSCG00000010453	HERC5|PML|IFIT1|
GO:0040011	locomotion	biological_process	0.0090716	0.54194	8	66	204	4727	ENSSSCG00000022916,ENSSSCG00000001912,ENSSSCG00000023868,ENSSSCG00000001050,ENSSSCG00000026362,ENSSSCG00000006495,ENSSSCG00000026412,ENSSSCG00000026383	EVL|PML|C3AR1|EDN1|HES1|SEMA4A|-|NRP2|
GO:2000145	regulation of cell motility	biological_process	0.0092122	0.54194	5	66	91	4727	ENSSSCG00000023868,ENSSSCG00000022916,ENSSSCG00000026412,ENSSSCG00000001050,ENSSSCG00000006495	C3AR1|EVL|-|EDN1|SEMA4A|
GO:0002085	inhibition of neuroepithelial cell differentiation	biological_process	0.0094298	0.54194	1	66	1	4727	ENSSSCG00000026362	HES1|
GO:0003310	pancreatic A cell differentiation	biological_process	0.0094298	0.54194	1	66	1	4727	ENSSSCG00000026362	HES1|
GO:0009794	regulation of mitotic cell cycle, embryonic	biological_process	0.0094298	0.54194	1	66	1	4727	ENSSSCG00000026362	HES1|
GO:0021555	midbrain-hindbrain boundary morphogenesis	biological_process	0.0094298	0.54194	1	66	1	4727	ENSSSCG00000026362	HES1|
GO:0021557	oculomotor nerve development	biological_process	0.0094298	0.54194	1	66	1	4727	ENSSSCG00000026362	HES1|
GO:0021558	trochlear nerve development	biological_process	0.0094298	0.54194	1	66	1	4727	ENSSSCG00000026362	HES1|
GO:0035905	ascending aorta development	biological_process	0.0094298	0.54194	1	66	1	4727	ENSSSCG00000026362	HES1|
GO:0035910	ascending aorta morphogenesis	biological_process	0.0094298	0.54194	1	66	1	4727	ENSSSCG00000026362	HES1|
GO:0042668	auditory receptor cell fate determination	biological_process	0.0094298	0.54194	1	66	1	4727	ENSSSCG00000026362	HES1|
GO:0045448	mitotic cell cycle, embryonic	biological_process	0.0094298	0.54194	1	66	1	4727	ENSSSCG00000026362	HES1|
GO:0045977	positive regulation of mitotic cell cycle, embryonic	biological_process	0.0094298	0.54194	1	66	1	4727	ENSSSCG00000026362	HES1|
GO:0048664	neuron fate determination	biological_process	0.0094298	0.54194	1	66	1	4727	ENSSSCG00000026362	HES1|
GO:0048715	negative regulation of oligodendrocyte differentiation	biological_process	0.0094298	0.54194	1	66	1	4727	ENSSSCG00000026362	HES1|
GO:0060164	regulation of timing of neuron differentiation	biological_process	0.0094298	0.54194	1	66	1	4727	ENSSSCG00000026362	HES1|
GO:0061009	common bile duct development	biological_process	0.0094298	0.54194	1	66	1	4727	ENSSSCG00000026362	HES1|
GO:0061102	stomach neuroendocrine cell differentiation	biological_process	0.0094298	0.54194	1	66	1	4727	ENSSSCG00000026362	HES1|
GO:0061105	regulation of stomach neuroendocrine cell differentiation	biological_process	0.0094298	0.54194	1	66	1	4727	ENSSSCG00000026362	HES1|
GO:0061106	negative regulation of stomach neuroendocrine cell differentiation	biological_process	0.0094298	0.54194	1	66	1	4727	ENSSSCG00000026362	HES1|
GO:0071820	N-box binding	molecular_function	0.0094298	0.54194	1	66	1	4727	ENSSSCG00000026362	HES1|
GO:1901533	negative regulation of hematopoietic progenitor cell differentiation	biological_process	0.0094298	0.54194	1	66	1	4727	ENSSSCG00000026362	HES1|
GO:2000226	regulation of pancreatic A cell differentiation	biological_process	0.0094298	0.54194	1	66	1	4727	ENSSSCG00000026362	HES1|
GO:2000227	negative regulation of pancreatic A cell differentiation	biological_process	0.0094298	0.54194	1	66	1	4727	ENSSSCG00000026362	HES1|
GO:2000974	negative regulation of pro-B cell differentiation	biological_process	0.0094298	0.54194	1	66	1	4727	ENSSSCG00000026362	HES1|
GO:0005622	intracellular	cellular_component	0.009483	0.54194	45	66	2393	4727	ENSSSCG00000021725,ENSSSCG00000016925,ENSSSCG00000008648,ENSSSCG00000021712,ENSSSCG00000029531,ENSSSCG00000028326,ENSSSCG00000000623,ENSSSCG00000016057,ENSSSCG00000011951,ENSSSCG00000027372,ENSSSCG00000009997,ENSSSCG00000005724,ENSSSCG00000022916,ENSSSCG00000012077,ENSSSCG00000010453,ENSSSCG00000010454,ENSSSCG00000013835,ENSSSCG00000027219,ENSSSCG00000009882,ENSSSCG00000010991,ENSSSCG00000010452,…	PDS5B|PLK2|RSAD2|HERC6|-|NR4A1|BCL2L14|STAT1|NFKBIZ|SAMD9|OSM|SETX|EVL|MX1|IFIT1|IFIT5|CASP14|AKAP7|OAS1|AQP3|IFIT3|RBM47|EDN1|F5|DUSP10|SRRM2|CBLB|MX2|CMPK2|HES1|SIDT2|TOR3A|C3AR1|PML|CREB3L2|DIRAS3|-|TNFSF13B|-|IFIT2|DYNC1H1|NT5C3A|SETD1B|HERC5|RALGDS|
GO:0051051	negative regulation of transport	biological_process	0.0094904	0.54194	4	66	57	4727	ENSSSCG00000012077,ENSSSCG00000008648,ENSSSCG00000009997,ENSSSCG00000001912	MX1|RSAD2|OSM|PML|
GO:0009967	positive regulation of signal transduction	biological_process	0.0097254	0.54194	7	66	160	4727	ENSSSCG00000026362,ENSSSCG00000000623,ENSSSCG00000016925,ENSSSCG00000008648,ENSSSCG00000009997,ENSSSCG00000001912,ENSSSCG00000001050	HES1|BCL2L14|PLK2|RSAD2|OSM|PML|EDN1|
GO:0032844	regulation of homeostatic process	biological_process	0.0099547	0.54194	4	66	57	4727	ENSSSCG00000027982,ENSSSCG00000015074,ENSSSCG00000001050,ENSSSCG00000001912	ISG15|SIDT2|EDN1|PML|
GO:0002698	negative regulation of immune effector process	biological_process	0.010281	0.54194	2	66	10	4727	ENSSSCG00000010831,ENSSSCG00000010453	DUSP10|IFIT1|
GO:0071363	cellular response to growth factor stimulus	biological_process	0.010487	0.54194	4	66	57	4727	ENSSSCG00000005724,ENSSSCG00000026383,ENSSSCG00000001912,ENSSSCG00000024996	SETX|NRP2|PML|-|
GO:0043281	regulation of cysteine-type endopeptidase activity involved in apoptotic process	biological_process	0.010967	0.54194	3	66	33	4727	ENSSSCG00000028326,ENSSSCG00000013835,ENSSSCG00000001912	NR4A1|CASP14|PML|
GO:0005147	oncostatin-M receptor binding	molecular_function	0.011061	0.54194	1	66	1	4727	ENSSSCG00000009997	OSM|
GO:0048266	behavioral response to pain	biological_process	0.011061	0.54194	1	66	1	4727	ENSSSCG00000009997	OSM|
GO:0008219	cell death	biological_process	0.011107	0.54194	9	66	255	4727	ENSSSCG00000001912,ENSSSCG00000010452,ENSSSCG00000005724,ENSSSCG00000009997,ENSSSCG00000000623,ENSSSCG00000013835,ENSSSCG00000028326,ENSSSCG00000010451,ENSSSCG00000016925	PML|IFIT3|SETX|OSM|BCL2L14|CASP14|NR4A1|IFIT2|PLK2|
GO:0016265	death	biological_process	0.011107	0.54194	9	66	255	4727	ENSSSCG00000028326,ENSSSCG00000000623,ENSSSCG00000013835,ENSSSCG00000005724,ENSSSCG00000009997,ENSSSCG00000010452,ENSSSCG00000001912,ENSSSCG00000016925,ENSSSCG00000010451	NR4A1|BCL2L14|CASP14|SETX|OSM|IFIT3|PML|PLK2|IFIT2|
GO:0051046	regulation of secretion	biological_process	0.011173	0.54194	5	66	94	4727	ENSSSCG00000015074,ENSSSCG00000001050,ENSSSCG00000001912,ENSSSCG00000009997,ENSSSCG00000008648	SIDT2|EDN1|PML|OSM|RSAD2|
GO:0042592	homeostatic process	biological_process	0.011403	0.54194	8	66	212	4727	ENSSSCG00000015074,ENSSSCG00000023868,ENSSSCG00000001912,ENSSSCG00000001050,ENSSSCG00000010991,ENSSSCG00000009882,ENSSSCG00000027982,ENSSSCG00000010453	SIDT2|C3AR1|PML|EDN1|AQP3|OAS1|ISG15|IFIT1|
GO:0023056	positive regulation of signaling	biological_process	0.011419	0.54194	7	66	165	4727	ENSSSCG00000016925,ENSSSCG00000026362,ENSSSCG00000000623,ENSSSCG00000001050,ENSSSCG00000001912,ENSSSCG00000009997,ENSSSCG00000008648	PLK2|HES1|BCL2L14|EDN1|PML|OSM|RSAD2|
GO:0010647	positive regulation of cell communication	biological_process	0.011487	0.54194	7	66	165	4727	ENSSSCG00000001050,ENSSSCG00000001912,ENSSSCG00000008648,ENSSSCG00000009997,ENSSSCG00000016925,ENSSSCG00000000623,ENSSSCG00000026362	EDN1|PML|RSAD2|OSM|PLK2|BCL2L14|HES1|
GO:0031965	nuclear membrane	cellular_component	0.011572	0.54194	3	66	30	4727	ENSSSCG00000001912,ENSSSCG00000028326,ENSSSCG00000012077	PML|NR4A1|MX1|
GO:0021675	nerve development	biological_process	0.011584	0.54194	2	66	12	4727	ENSSSCG00000026383,ENSSSCG00000026362	NRP2|HES1|
GO:0002684	positive regulation of immune system process	biological_process	0.0117	0.54194	5	66	102	4727	ENSSSCG00000008648,ENSSSCG00000010991,ENSSSCG00000023868,ENSSSCG00000026362,ENSSSCG00000024996	RSAD2|AQP3|C3AR1|HES1|-|
GO:0051480	cytosolic calcium ion homeostasis	biological_process	0.01176	0.54194	3	66	31	4727	ENSSSCG00000001912,ENSSSCG00000001050,ENSSSCG00000023868	PML|EDN1|C3AR1|
GO:0030516	regulation of axon extension	biological_process	0.011812	0.54194	2	66	11	4727	ENSSSCG00000026412,ENSSSCG00000006495	-|SEMA4A|
GO:0032526	response to retinoic acid	biological_process	0.011832	0.54194	2	66	11	4727	ENSSSCG00000005724,ENSSSCG00000010991	SETX|AQP3|
GO:0060560	developmental growth involved in morphogenesis	biological_process	0.01197	0.54194	3	66	32	4727	ENSSSCG00000006495,ENSSSCG00000026383,ENSSSCG00000026412	SEMA4A|NRP2|-|
GO:0033993	response to lipid	biological_process	0.012004	0.54194	5	66	93	4727	ENSSSCG00000005724,ENSSSCG00000010991,ENSSSCG00000010831,ENSSSCG00000028326,ENSSSCG00000008647	SETX|AQP3|DUSP10|NR4A1|CMPK2|
GO:0070848	response to growth factor stimulus	biological_process	0.012139	0.54194	4	66	60	4727	ENSSSCG00000005724,ENSSSCG00000001912,ENSSSCG00000026383,ENSSSCG00000024996	SETX|PML|NRP2|-|
GO:0045598	regulation of fat cell differentiation	biological_process	0.012243	0.54194	2	66	12	4727	ENSSSCG00000026362,ENSSSCG00000010831	HES1|DUSP10|
GO:0046879	hormone secretion	biological_process	0.012296	0.54194	3	66	36	4727	ENSSSCG00000015074,ENSSSCG00000009997,ENSSSCG00000001050	SIDT2|OSM|EDN1|
GO:0031397	negative regulation of protein ubiquitination	biological_process	0.012559	0.54194	2	66	12	4727	ENSSSCG00000001912,ENSSSCG00000027982	PML|ISG15|
GO:0010613	positive regulation of cardiac muscle hypertrophy	biological_process	0.012648	0.54194	1	66	1	4727	ENSSSCG00000001050	EDN1|
GO:0010870	positive regulation of receptor biosynthetic process	biological_process	0.012648	0.54194	1	66	1	4727	ENSSSCG00000001050	EDN1|
GO:0014742	positive regulation of muscle hypertrophy	biological_process	0.012648	0.54194	1	66	1	4727	ENSSSCG00000001050	EDN1|
GO:0014826	vein smooth muscle contraction	biological_process	0.012648	0.54194	1	66	1	4727	ENSSSCG00000001050	EDN1|
GO:0030185	nitric oxide transport	biological_process	0.012648	0.54194	1	66	1	4727	ENSSSCG00000001050	EDN1|
GO:0031583	phospholipase D-activating G-protein coupled receptor signaling pathway	biological_process	0.012648	0.54194	1	66	1	4727	ENSSSCG00000001050	EDN1|
GO:0031705	bombesin receptor binding	molecular_function	0.012648	0.54194	1	66	1	4727	ENSSSCG00000001050	EDN1|
GO:0031707	endothelin A receptor binding	molecular_function	0.012648	0.54194	1	66	1	4727	ENSSSCG00000001050	EDN1|
GO:0031708	endothelin B receptor binding	molecular_function	0.012648	0.54194	1	66	1	4727	ENSSSCG00000001050	EDN1|
GO:0042313	protein kinase C deactivation	biological_process	0.012648	0.54194	1	66	1	4727	ENSSSCG00000001050	EDN1|
GO:0043179	rhythmic excitation	biological_process	0.012648	0.54194	1	66	1	4727	ENSSSCG00000001050	EDN1|
GO:0045793	positive regulation of cell size	biological_process	0.012648	0.54194	1	66	1	4727	ENSSSCG00000001050	EDN1|
GO:0051771	negative regulation of nitric-oxide synthase biosynthetic process	biological_process	0.012648	0.54194	1	66	1	4727	ENSSSCG00000001050	EDN1|
GO:0060297	regulation of sarcomere organization	biological_process	0.012648	0.54194	1	66	1	4727	ENSSSCG00000001050	EDN1|
GO:0060298	positive regulation of sarcomere organization	biological_process	0.012648	0.54194	1	66	1	4727	ENSSSCG00000001050	EDN1|
GO:0060584	regulation of prostaglandin-endoperoxide synthase activity	biological_process	0.012648	0.54194	1	66	1	4727	ENSSSCG00000001050	EDN1|
GO:0060585	positive regulation of prostaglandin-endoperoxide synthase activity	biological_process	0.012648	0.54194	1	66	1	4727	ENSSSCG00000001050	EDN1|
GO:0042531	positive regulation of tyrosine phosphorylation of STAT protein	biological_process	0.012663	0.54194	2	66	13	4727	ENSSSCG00000009997,ENSSSCG00000026362	OSM|HES1|
GO:0048518	positive regulation of biological process	biological_process	0.012982	0.54194	18	66	717	4727	ENSSSCG00000016520,ENSSSCG00000024996,ENSSSCG00000010453,ENSSSCG00000010451,ENSSSCG00000006495,ENSSSCG00000010991,ENSSSCG00000001050,ENSSSCG00000027982,ENSSSCG00000016925,ENSSSCG00000008648,ENSSSCG00000028326,ENSSSCG00000026362,ENSSSCG00000000623,ENSSSCG00000005724,ENSSSCG00000009997,ENSSSCG00000023868,ENSSSCG00000022916,ENSSSCG00000001912	CREB3L2|-|IFIT1|IFIT2|SEMA4A|AQP3|EDN1|ISG15|PLK2|RSAD2|NR4A1|HES1|BCL2L14|SETX|OSM|C3AR1|EVL|PML|
GO:2000116	regulation of cysteine-type endopeptidase activity	biological_process	0.013213	0.54194	3	66	35	4727	ENSSSCG00000001912,ENSSSCG00000013835,ENSSSCG00000028326	PML|CASP14|NR4A1|
GO:0045765	regulation of angiogenesis	biological_process	0.013532	0.54194	3	66	34	4727	ENSSSCG00000001912,ENSSSCG00000023868,ENSSSCG00000006495	PML|C3AR1|SEMA4A|
GO:0001730	2'-5'-oligoadenylate synthetase activity	molecular_function	0.013599	0.54194	1	66	1	4727	ENSSSCG00000009882	OAS1|
GO:0040012	regulation of locomotion	biological_process	0.013844	0.54194	5	66	100	4727	ENSSSCG00000022916,ENSSSCG00000023868,ENSSSCG00000026412,ENSSSCG00000001050,ENSSSCG00000006495	EVL|C3AR1|-|EDN1|SEMA4A|
GO:0031344	regulation of cell projection organization	biological_process	0.014301	0.54194	4	66	60	4727	ENSSSCG00000006495,ENSSSCG00000026412,ENSSSCG00000022916,ENSSSCG00000005724	SEMA4A|-|EVL|SETX|
GO:0050709	negative regulation of protein secretion	biological_process	0.014328	0.54194	2	66	12	4727	ENSSSCG00000008648,ENSSSCG00000001912	RSAD2|PML|
GO:0016879	ligase activity, forming carbon-nitrogen bonds	molecular_function	0.014389	0.54194	5	66	91	4727	ENSSSCG00000030548,ENSSSCG00000017148,ENSSSCG00000017146,ENSSSCG00000021712,ENSSSCG00000022486	HERC5|-|RNF213|HERC6|CBLB|
GO:0002067	glandular epithelial cell differentiation	biological_process	0.014397	0.54194	2	66	12	4727	ENSSSCG00000015074,ENSSSCG00000026362	SIDT2|HES1|
GO:0048869	cellular developmental process	biological_process	0.014425	0.54194	15	66	561	4727	ENSSSCG00000027982,ENSSSCG00000016520,ENSSSCG00000010831,ENSSSCG00000008648,ENSSSCG00000021712,ENSSSCG00000026383,ENSSSCG00000026412,ENSSSCG00000028326,ENSSSCG00000026362,ENSSSCG00000006495,ENSSSCG00000015074,ENSSSCG00000005724,ENSSSCG00000008796,ENSSSCG00000001912,ENSSSCG00000001050	ISG15|CREB3L2|DUSP10|RSAD2|HERC6|NRP2|-|NR4A1|HES1|SEMA4A|SIDT2|SETX|RBM47|PML|EDN1|
GO:0046632	alpha-beta T cell differentiation	biological_process	0.014706	0.54194	2	66	13	4727	ENSSSCG00000008648,ENSSSCG00000006495	RSAD2|SEMA4A|
GO:1901342	regulation of vasculature development	biological_process	0.014855	0.54194	3	66	35	4727	ENSSSCG00000023868,ENSSSCG00000001912,ENSSSCG00000006495	C3AR1|PML|SEMA4A|
GO:0048709	oligodendrocyte differentiation	biological_process	0.014926	0.54194	2	66	13	4727	ENSSSCG00000010831,ENSSSCG00000026362	DUSP10|HES1|
GO:0051098	regulation of binding	biological_process	0.014927	0.54194	3	66	38	4727	ENSSSCG00000026362,ENSSSCG00000010451,ENSSSCG00000010453	HES1|IFIT2|IFIT1|
GO:0031386	protein tag	molecular_function	0.014989	0.54194	1	66	2	4727	ENSSSCG00000027982	ISG15|
GO:0042509	regulation of tyrosine phosphorylation of STAT protein	biological_process	0.015256	0.54194	2	66	14	4727	ENSSSCG00000026362,ENSSSCG00000009997	HES1|OSM|
GO:0051097	negative regulation of helicase activity	biological_process	0.015504	0.54194	1	66	1	4727	ENSSSCG00000010453	IFIT1|
GO:0002250	adaptive immune response	biological_process	0.015598	0.54194	3	66	38	4727	ENSSSCG00000006495,ENSSSCG00000010831,ENSSSCG00000008648	SEMA4A|DUSP10|RSAD2|
GO:0065008	regulation of biological quality	biological_process	0.015859	0.54194	14	66	518	4727	ENSSSCG00000001912,ENSSSCG00000023868,ENSSSCG00000022916,ENSSSCG00000001050,ENSSSCG00000010991,ENSSSCG00000009997,ENSSSCG00000009882,ENSSSCG00000015074,ENSSSCG00000006495,ENSSSCG00000026412,ENSSSCG00000010453,ENSSSCG00000006289,ENSSSCG00000016925,ENSSSCG00000027982	PML|C3AR1|EVL|EDN1|AQP3|OSM|OAS1|SIDT2|SEMA4A|-|IFIT1|F5|PLK2|ISG15|
GO:0002819	regulation of adaptive immune response	biological_process	0.016055	0.54194	2	66	13	4727	ENSSSCG00000008648,ENSSSCG00000010831	RSAD2|DUSP10|
GO:0051270	regulation of cellular component movement	biological_process	0.016063	0.54194	5	66	104	4727	ENSSSCG00000006495,ENSSSCG00000023868,ENSSSCG00000022916,ENSSSCG00000026412,ENSSSCG00000001050	SEMA4A|C3AR1|EVL|-|EDN1|
GO:0001558	regulation of cell growth	biological_process	0.016372	0.54194	3	66	36	4727	ENSSSCG00000006495,ENSSSCG00000026412,ENSSSCG00000001912	SEMA4A|-|PML|
GO:0034154	toll-like receptor 7 signaling pathway	biological_process	0.016431	0.54194	1	66	1	4727	ENSSSCG00000008648	RSAD2|
GO:0034155	regulation of toll-like receptor 7 signaling pathway	biological_process	0.016431	0.54194	1	66	1	4727	ENSSSCG00000008648	RSAD2|
GO:0034157	positive regulation of toll-like receptor 7 signaling pathway	biological_process	0.016431	0.54194	1	66	1	4727	ENSSSCG00000008648	RSAD2|
GO:0034163	regulation of toll-like receptor 9 signaling pathway	biological_process	0.016431	0.54194	1	66	1	4727	ENSSSCG00000008648	RSAD2|
GO:0034165	positive regulation of toll-like receptor 9 signaling pathway	biological_process	0.016431	0.54194	1	66	1	4727	ENSSSCG00000008648	RSAD2|
GO:2000551	regulation of T-helper 2 cell cytokine production	biological_process	0.016431	0.54194	1	66	1	4727	ENSSSCG00000008648	RSAD2|
GO:2000553	positive regulation of T-helper 2 cell cytokine production	biological_process	0.016431	0.54194	1	66	1	4727	ENSSSCG00000008648	RSAD2|
GO:0004798	thymidylate kinase activity	molecular_function	0.016444	0.54194	1	66	1	4727	ENSSSCG00000008647	CMPK2|
GO:0006227	dUDP biosynthetic process	biological_process	0.016444	0.54194	1	66	1	4727	ENSSSCG00000008647	CMPK2|
GO:0006233	dTDP biosynthetic process	biological_process	0.016444	0.54194	1	66	1	4727	ENSSSCG00000008647	CMPK2|
GO:0006235	dTTP biosynthetic process	biological_process	0.016444	0.54194	1	66	1	4727	ENSSSCG00000008647	CMPK2|
GO:0009138	pyrimidine nucleoside diphosphate metabolic process	biological_process	0.016444	0.54194	1	66	1	4727	ENSSSCG00000008647	CMPK2|
GO:0009139	pyrimidine nucleoside diphosphate biosynthetic process	biological_process	0.016444	0.54194	1	66	1	4727	ENSSSCG00000008647	CMPK2|
GO:0009186	deoxyribonucleoside diphosphate metabolic process	biological_process	0.016444	0.54194	1	66	1	4727	ENSSSCG00000008647	CMPK2|
GO:0009189	deoxyribonucleoside diphosphate biosynthetic process	biological_process	0.016444	0.54194	1	66	1	4727	ENSSSCG00000008647	CMPK2|
GO:0009196	pyrimidine deoxyribonucleoside diphosphate metabolic process	biological_process	0.016444	0.54194	1	66	1	4727	ENSSSCG00000008647	CMPK2|
GO:0009197	pyrimidine deoxyribonucleoside diphosphate biosynthetic process	biological_process	0.016444	0.54194	1	66	1	4727	ENSSSCG00000008647	CMPK2|
GO:0009202	deoxyribonucleoside triphosphate biosynthetic process	biological_process	0.016444	0.54194	1	66	1	4727	ENSSSCG00000008647	CMPK2|
GO:0009211	pyrimidine deoxyribonucleoside triphosphate metabolic process	biological_process	0.016444	0.54194	1	66	1	4727	ENSSSCG00000008647	CMPK2|
GO:0009212	pyrimidine deoxyribonucleoside triphosphate biosynthetic process	biological_process	0.016444	0.54194	1	66	1	4727	ENSSSCG00000008647	CMPK2|
GO:0033862	UMP kinase activity	molecular_function	0.016444	0.54194	1	66	1	4727	ENSSSCG00000008647	CMPK2|
GO:0046072	dTDP metabolic process	biological_process	0.016444	0.54194	1	66	1	4727	ENSSSCG00000008647	CMPK2|
GO:0046075	dTTP metabolic process	biological_process	0.016444	0.54194	1	66	1	4727	ENSSSCG00000008647	CMPK2|
GO:0046077	dUDP metabolic process	biological_process	0.016444	0.54194	1	66	1	4727	ENSSSCG00000008647	CMPK2|
GO:0033227	dsRNA transport	biological_process	0.016487	0.54194	1	66	1	4727	ENSSSCG00000015074	SIDT2|
GO:0051032	nucleic acid transmembrane transporter activity	molecular_function	0.016487	0.54194	1	66	1	4727	ENSSSCG00000015074	SIDT2|
GO:0051033	RNA transmembrane transporter activity	molecular_function	0.016487	0.54194	1	66	1	4727	ENSSSCG00000015074	SIDT2|
GO:0001817	regulation of cytokine production	biological_process	0.016667	0.54194	4	66	69	4727	ENSSSCG00000023868,ENSSSCG00000001912,ENSSSCG00000008648,ENSSSCG00000027982	C3AR1|PML|RSAD2|ISG15|
GO:0000165	MAPK cascade	biological_process	0.016683	0.54194	5	66	101	4727	ENSSSCG00000010831,ENSSSCG00000024996,ENSSSCG00000001050,ENSSSCG00000009997,ENSSSCG00000005724	DUSP10|-|EDN1|OSM|SETX|
GO:0009914	hormone transport	biological_process	0.016796	0.54194	3	66	40	4727	ENSSSCG00000015074,ENSSSCG00000009997,ENSSSCG00000001050	SIDT2|OSM|EDN1|
GO:0019725	cellular homeostasis	biological_process	0.017047	0.54194	5	66	102	4727	ENSSSCG00000001912,ENSSSCG00000001050,ENSSSCG00000023868,ENSSSCG00000010991,ENSSSCG00000015074	PML|EDN1|C3AR1|AQP3|SIDT2|
GO:0032439	endosome localization	biological_process	0.017115	0.54194	1	66	1	4727	ENSSSCG00000012077	MX1|
GO:0046788	egress of virus within host cell	biological_process	0.017115	0.54194	1	66	1	4727	ENSSSCG00000012077	MX1|
GO:1901252	regulation of egress of virus within host cell	biological_process	0.017115	0.54194	1	66	1	4727	ENSSSCG00000012077	MX1|
GO:1901253	negative regulation of egress of virus within host cell	biological_process	0.017115	0.54194	1	66	1	4727	ENSSSCG00000012077	MX1|
GO:0034237	protein kinase A regulatory subunit binding	molecular_function	0.017192	0.54194	1	66	1	4727	ENSSSCG00000027219	AKAP7|
GO:0051959	dynein light intermediate chain binding	molecular_function	0.017255	0.54194	1	66	1	4727	ENSSSCG00000002538	DYNC1H1|
GO:0061309	cardiac neural crest cell development involved in outflow tract morphogenesis	biological_process	0.017256	0.54194	1	66	2	4727	ENSSSCG00000026362	HES1|
GO:0042296	ISG15 ligase activity	molecular_function	0.017421	0.54194	1	66	1	4727	ENSSSCG00000030548	HERC5|
GO:0006203	dGTP catabolic process	biological_process	0.017506	0.54194	1	66	1	4727	ENSSSCG00000029531	-|
GO:0008832	dGTPase activity	molecular_function	0.017506	0.54194	1	66	1	4727	ENSSSCG00000029531	-|
GO:0009151	purine deoxyribonucleotide metabolic process	biological_process	0.017506	0.54194	1	66	1	4727	ENSSSCG00000029531	-|
GO:0009155	purine deoxyribonucleotide catabolic process	biological_process	0.017506	0.54194	1	66	1	4727	ENSSSCG00000029531	-|
GO:0009204	deoxyribonucleoside triphosphate catabolic process	biological_process	0.017506	0.54194	1	66	1	4727	ENSSSCG00000029531	-|
GO:0009215	purine deoxyribonucleoside triphosphate metabolic process	biological_process	0.017506	0.54194	1	66	1	4727	ENSSSCG00000029531	-|
GO:0009217	purine deoxyribonucleoside triphosphate catabolic process	biological_process	0.017506	0.54194	1	66	1	4727	ENSSSCG00000029531	-|
GO:0009264	deoxyribonucleotide catabolic process	biological_process	0.017506	0.54194	1	66	1	4727	ENSSSCG00000029531	-|
GO:0016793	triphosphoric monoester hydrolase activity	molecular_function	0.017506	0.54194	1	66	1	4727	ENSSSCG00000029531	-|
GO:0046070	dGTP metabolic process	biological_process	0.017506	0.54194	1	66	1	4727	ENSSSCG00000029531	-|
GO:0046386	deoxyribose phosphate catabolic process	biological_process	0.017506	0.54194	1	66	1	4727	ENSSSCG00000029531	-|
GO:0002536	respiratory burst involved in inflammatory response	biological_process	0.017613	0.54194	1	66	1	4727	ENSSSCG00000010831	DUSP10|
GO:0002679	respiratory burst involved in defense response	biological_process	0.017613	0.54194	1	66	1	4727	ENSSSCG00000010831	DUSP10|
GO:0044387	negative regulation of protein kinase activity by regulation of protein phosphorylation	biological_process	0.017613	0.54194	1	66	1	4727	ENSSSCG00000010831	DUSP10|
GO:0045730	respiratory burst	biological_process	0.017613	0.54194	1	66	1	4727	ENSSSCG00000010831	DUSP10|
GO:0060263	regulation of respiratory burst	biological_process	0.017613	0.54194	1	66	1	4727	ENSSSCG00000010831	DUSP10|
GO:0060264	regulation of respiratory burst involved in inflammatory response	biological_process	0.017613	0.54194	1	66	1	4727	ENSSSCG00000010831	DUSP10|
GO:0060266	negative regulation of respiratory burst involved in inflammatory response	biological_process	0.017613	0.54194	1	66	1	4727	ENSSSCG00000010831	DUSP10|
GO:0060268	negative regulation of respiratory burst	biological_process	0.017613	0.54194	1	66	1	4727	ENSSSCG00000010831	DUSP10|
GO:0090335	regulation of brown fat cell differentiation	biological_process	0.017613	0.54194	1	66	1	4727	ENSSSCG00000010831	DUSP10|
GO:0032091	negative regulation of protein binding	biological_process	0.017617	0.54194	2	66	15	4727	ENSSSCG00000010453,ENSSSCG00000010451	IFIT1|IFIT2|
GO:0008252	nucleotidase activity	molecular_function	0.017636	0.54194	1	66	1	4727	ENSSSCG00000022912	NT5C3A|
GO:0008253	5'-nucleotidase activity	molecular_function	0.017636	0.54194	1	66	1	4727	ENSSSCG00000022912	NT5C3A|
GO:0007182	common-partner SMAD protein phosphorylation	biological_process	0.017642	0.54194	1	66	1	4727	ENSSSCG00000001912	PML|
GO:0032055	negative regulation of translation in response to stress	biological_process	0.017642	0.54194	1	66	1	4727	ENSSSCG00000001912	PML|
GO:0032938	negative regulation of translation in response to oxidative stress	biological_process	0.017642	0.54194	1	66	1	4727	ENSSSCG00000001912	PML|
GO:0043555	regulation of translation in response to stress	biological_process	0.017642	0.54194	1	66	1	4727	ENSSSCG00000001912	PML|
GO:0043556	regulation of translation in response to oxidative stress	biological_process	0.017642	0.54194	1	66	1	4727	ENSSSCG00000001912	PML|
GO:0045341	MHC class I biosynthetic process	biological_process	0.017642	0.54194	1	66	1	4727	ENSSSCG00000001912	PML|
GO:0045343	regulation of MHC class I biosynthetic process	biological_process	0.017642	0.54194	1	66	1	4727	ENSSSCG00000001912	PML|
GO:2000059	negative regulation of protein ubiquitination involved in ubiquitin-dependent protein catabolic process	biological_process	0.017642	0.54194	1	66	1	4727	ENSSSCG00000001912	PML|
GO:0001147	transcription termination site sequence-specific DNA binding	molecular_function	0.017644	0.54194	1	66	1	4727	ENSSSCG00000005724	SETX|
GO:0001160	transcription termination site DNA binding	molecular_function	0.017644	0.54194	1	66	1	4727	ENSSSCG00000005724	SETX|
GO:0006369	termination of RNA polymerase II transcription	biological_process	0.017644	0.54194	1	66	1	4727	ENSSSCG00000005724	SETX|
GO:0030846	termination of RNA polymerase II transcription, poly(A)-coupled	biological_process	0.017644	0.54194	1	66	1	4727	ENSSSCG00000005724	SETX|
GO:0031554	regulation of DNA-dependent transcription, termination	biological_process	0.017644	0.54194	1	66	1	4727	ENSSSCG00000005724	SETX|
GO:0060566	positive regulation of DNA-dependent transcription, termination	biological_process	0.017644	0.54194	1	66	1	4727	ENSSSCG00000005724	SETX|
GO:2000804	regulation of termination of RNA polymerase II transcription, poly(A)-coupled	biological_process	0.017644	0.54194	1	66	1	4727	ENSSSCG00000005724	SETX|
GO:2000806	positive regulation of termination of RNA polymerase II transcription, poly(A)-coupled	biological_process	0.017644	0.54194	1	66	1	4727	ENSSSCG00000005724	SETX|
GO:0002116	semaphorin receptor complex	cellular_component	0.017644	0.54194	1	66	1	4727	ENSSSCG00000026412	-|
GO:0021785	branchiomotor neuron axon guidance	biological_process	0.017644	0.54194	1	66	1	4727	ENSSSCG00000026412	-|
GO:0021934	hindbrain tangential cell migration	biological_process	0.017644	0.54194	1	66	1	4727	ENSSSCG00000026412	-|
GO:0021935	cerebellar granule cell precursor tangential migration	biological_process	0.017644	0.54194	1	66	1	4727	ENSSSCG00000026412	-|
GO:1902287	semaphorin-plexin signaling pathway involved in axon guidance	biological_process	0.017644	0.54194	1	66	1	4727	ENSSSCG00000026412	-|
GO:0035497	cAMP response element binding	molecular_function	0.017644	0.54194	1	66	1	4727	ENSSSCG00000016520	CREB3L2|
GO:0021561	facial nerve development	biological_process	0.017644	0.54194	1	66	1	4727	ENSSSCG00000026383	NRP2|
GO:0021610	facial nerve morphogenesis	biological_process	0.017644	0.54194	1	66	1	4727	ENSSSCG00000026383	NRP2|
GO:0021612	facial nerve structural organization	biological_process	0.017644	0.54194	1	66	1	4727	ENSSSCG00000026383	NRP2|
GO:0021648	vestibulocochlear nerve morphogenesis	biological_process	0.017644	0.54194	1	66	1	4727	ENSSSCG00000026383	NRP2|
GO:0021649	vestibulocochlear nerve structural organization	biological_process	0.017644	0.54194	1	66	1	4727	ENSSSCG00000026383	NRP2|
GO:0021800	cerebral cortex tangential migration	biological_process	0.017644	0.54194	1	66	1	4727	ENSSSCG00000026383	NRP2|
GO:0021824	cerebral cortex tangential migration using cell-axon interactions	biological_process	0.017644	0.54194	1	66	1	4727	ENSSSCG00000026383	NRP2|
GO:0021825	substrate-dependent cerebral cortex tangential migration	biological_process	0.017644	0.54194	1	66	1	4727	ENSSSCG00000026383	NRP2|
GO:0021828	gonadotrophin-releasing hormone neuronal migration to the hypothalamus	biological_process	0.017644	0.54194	1	66	1	4727	ENSSSCG00000026383	NRP2|
GO:0021856	hypothalamic tangential migration using cell-axon interactions	biological_process	0.017644	0.54194	1	66	1	4727	ENSSSCG00000026383	NRP2|
GO:0021886	hypothalamus gonadotrophin-releasing hormone neuron differentiation	biological_process	0.017644	0.54194	1	66	1	4727	ENSSSCG00000026383	NRP2|
GO:0021888	hypothalamus gonadotrophin-releasing hormone neuron development	biological_process	0.017644	0.54194	1	66	1	4727	ENSSSCG00000026383	NRP2|
GO:0061548	ganglion development	biological_process	0.017644	0.54194	1	66	1	4727	ENSSSCG00000026383	NRP2|
GO:0061549	sympathetic ganglion development	biological_process	0.017644	0.54194	1	66	1	4727	ENSSSCG00000026383	NRP2|
GO:0061550	cranial ganglion development	biological_process	0.017644	0.54194	1	66	1	4727	ENSSSCG00000026383	NRP2|
GO:0061551	trigeminal ganglion development	biological_process	0.017644	0.54194	1	66	1	4727	ENSSSCG00000026383	NRP2|
GO:0097490	sympathetic neuron projection extension	biological_process	0.017644	0.54194	1	66	1	4727	ENSSSCG00000026383	NRP2|
GO:0097491	sympathetic neuron projection guidance	biological_process	0.017644	0.54194	1	66	1	4727	ENSSSCG00000026383	NRP2|
GO:1901166	neural crest cell migration involved in autonomic nervous system development	biological_process	0.017644	0.54194	1	66	1	4727	ENSSSCG00000026383	NRP2|
GO:0014009	glial cell proliferation	biological_process	0.017662	0.54194	1	66	2	4727	ENSSSCG00000026362	HES1|
GO:0060251	regulation of glial cell proliferation	biological_process	0.017662	0.54194	1	66	2	4727	ENSSSCG00000026362	HES1|
GO:0060253	negative regulation of glial cell proliferation	biological_process	0.017662	0.54194	1	66	2	4727	ENSSSCG00000026362	HES1|
GO:0006919	activation of cysteine-type endopeptidase activity involved in apoptotic process	biological_process	0.017958	0.54762	2	66	14	4727	ENSSSCG00000013835,ENSSSCG00000001912	CASP14|PML|
GO:0006935	chemotaxis	biological_process	0.017996	0.54762	4	66	73	4727	ENSSSCG00000006495,ENSSSCG00000023868,ENSSSCG00000026412,ENSSSCG00000026383	SEMA4A|C3AR1|-|NRP2|
GO:0042330	taxis	biological_process	0.017996	0.54762	4	66	73	4727	ENSSSCG00000026383,ENSSSCG00000023868,ENSSSCG00000026412,ENSSSCG00000006495	NRP2|C3AR1|-|SEMA4A|
GO:0030308	negative regulation of cell growth	biological_process	0.018258	0.55297	2	66	14	4727	ENSSSCG00000006495,ENSSSCG00000001912	SEMA4A|PML|
GO:0050768	negative regulation of neurogenesis	biological_process	0.018273	0.55297	2	66	14	4727	ENSSSCG00000026362,ENSSSCG00000006495	HES1|SEMA4A|
GO:0005634	nucleus	cellular_component	0.018478	0.55763	23	66	1047	4727	ENSSSCG00000009806,ENSSSCG00000027219,ENSSSCG00000013835,ENSSSCG00000008796,ENSSSCG00000005738,ENSSSCG00000010991,ENSSSCG00000009882,ENSSSCG00000012077,ENSSSCG00000016520,ENSSSCG00000012076,ENSSSCG00000028326,ENSSSCG00000008647,ENSSSCG00000029531,ENSSSCG00000026362,ENSSSCG00000016057,ENSSSCG00000001912,ENSSSCG00000005724,ENSSSCG00000011951,ENSSSCG00000021725,ENSSSCG00000010831,ENSSSCG00000023304,…	SETD1B|AKAP7|CASP14|RBM47|RALGDS|AQP3|OAS1|MX1|CREB3L2|MX2|NR4A1|CMPK2|-|HES1|STAT1|PML|SETX|NFKBIZ|PDS5B|DUSP10|SRRM2|CBLB|HERC6|
GO:0045664	regulation of neuron differentiation	biological_process	0.018583	0.55926	4	66	67	4727	ENSSSCG00000006495,ENSSSCG00000026362,ENSSSCG00000005724,ENSSSCG00000026412	SEMA4A|HES1|SETX|-|
GO:0046631	alpha-beta T cell activation	biological_process	0.019217	0.57526	2	66	15	4727	ENSSSCG00000008648,ENSSSCG00000006495	RSAD2|SEMA4A|
GO:0002224	toll-like receptor signaling pathway	biological_process	0.019266	0.57526	2	66	14	4727	ENSSSCG00000008648,ENSSSCG00000024996	RSAD2|-|
GO:0008630	intrinsic apoptotic signaling pathway in response to DNA damage	biological_process	0.0193	0.57526	2	66	16	4727	ENSSSCG00000001912,ENSSSCG00000013835	PML|CASP14|
GO:0022603	regulation of anatomical structure morphogenesis	biological_process	0.019324	0.57526	6	66	143	4727	ENSSSCG00000006495,ENSSSCG00000026362,ENSSSCG00000001912,ENSSSCG00000001050,ENSSSCG00000026412,ENSSSCG00000023868	SEMA4A|HES1|PML|EDN1|-|C3AR1|
GO:0061387	regulation of extent of cell growth	biological_process	0.019745	0.58621	2	66	14	4727	ENSSSCG00000026412,ENSSSCG00000006495	-|SEMA4A|
GO:0032269	negative regulation of cellular protein metabolic process	biological_process	0.019868	0.58827	4	66	71	4727	ENSSSCG00000001050,ENSSSCG00000001912,ENSSSCG00000010831,ENSSSCG00000027982	EDN1|PML|DUSP10|ISG15|
GO:0048522	positive regulation of cellular process	biological_process	0.019984	0.59011	16	66	636	4727	ENSSSCG00000027982,ENSSSCG00000016925,ENSSSCG00000008648,ENSSSCG00000028326,ENSSSCG00000026362,ENSSSCG00000000623,ENSSSCG00000009997,ENSSSCG00000005724,ENSSSCG00000023868,ENSSSCG00000001912,ENSSSCG00000022916,ENSSSCG00000016520,ENSSSCG00000010453,ENSSSCG00000010451,ENSSSCG00000006495,ENSSSCG00000001050	ISG15|PLK2|RSAD2|NR4A1|HES1|BCL2L14|OSM|SETX|C3AR1|PML|EVL|CREB3L2|IFIT1|IFIT2|SEMA4A|EDN1|
GO:0046427	positive regulation of JAK-STAT cascade	biological_process	0.020069	0.5909	2	66	16	4727	ENSSSCG00000026362,ENSSSCG00000009997	HES1|OSM|
GO:1901363	heterocyclic compound binding	molecular_function	0.020118	0.5909	24	66	1121	4727	ENSSSCG00000012076,ENSSSCG00000028326,ENSSSCG00000026362,ENSSSCG00000016057,ENSSSCG00000005724,ENSSSCG00000017146,ENSSSCG00000015525,ENSSSCG00000025716,ENSSSCG00000015071,ENSSSCG00000016925,ENSSSCG00000010454,ENSSSCG00000022912,ENSSSCG00000009806,ENSSSCG00000009882,ENSSSCG00000010452,ENSSSCG00000008796,ENSSSCG00000026336,ENSSSCG00000012077,ENSSSCG00000016520,ENSSSCG00000003797,ENSSSCG00000024996,…	MX2|NR4A1|HES1|STAT1|SETX|RNF213|TOR3A|-|SIK3|PLK2|IFIT5|NT5C3A|SETD1B|OAS1|IFIT3|RBM47|-|MX1|CREB3L2|DIRAS3|-|IFIT1|-|IFIT2|
GO:0097191	extrinsic apoptotic signaling pathway	biological_process	0.020206	0.5919	3	66	40	4727	ENSSSCG00000001912,ENSSSCG00000013835,ENSSSCG00000000623	PML|CASP14|BCL2L14|
GO:0048646	anatomical structure formation involved in morphogenesis	biological_process	0.020304	0.59318	7	66	186	4727	ENSSSCG00000006495,ENSSSCG00000026362,ENSSSCG00000026383,ENSSSCG00000001912,ENSSSCG00000023868,ENSSSCG00000026412,ENSSSCG00000001050	SEMA4A|HES1|NRP2|PML|C3AR1|-|EDN1|
GO:0045648	positive regulation of erythrocyte differentiation	biological_process	0.020876	0.60754	1	66	2	4727	ENSSSCG00000027982	ISG15|
GO:0007260	tyrosine phosphorylation of STAT protein	biological_process	0.020906	0.60754	2	66	16	4727	ENSSSCG00000026362,ENSSSCG00000009997	HES1|OSM|
GO:0048856	anatomical structure development	biological_process	0.021005	0.60881	18	66	750	4727	ENSSSCG00000026362,ENSSSCG00000028326,ENSSSCG00000015074,ENSSSCG00000009997,ENSSSCG00000005724,ENSSSCG00000023868,ENSSSCG00000001912,ENSSSCG00000027982,ENSSSCG00000010831,ENSSSCG00000008648,ENSSSCG00000021712,ENSSSCG00000026412,ENSSSCG00000006495,ENSSSCG00000010991,ENSSSCG00000001050,ENSSSCG00000008796,ENSSSCG00000016520,ENSSSCG00000026383	HES1|NR4A1|SIDT2|OSM|SETX|C3AR1|PML|ISG15|DUSP10|RSAD2|HERC6|-|SEMA4A|AQP3|EDN1|RBM47|CREB3L2|NRP2|
GO:0090162	establishment of epithelial cell polarity	biological_process	0.021169	0.61075	1	66	2	4727	ENSSSCG00000026362	HES1|
GO:0043506	regulation of JUN kinase activity	biological_process	0.021183	0.61075	2	66	14	4727	ENSSSCG00000010831,ENSSSCG00000001050	DUSP10|EDN1|
GO:0048667	cell morphogenesis involved in neuron differentiation	biological_process	0.021374	0.61282	4	66	70	4727	ENSSSCG00000026362,ENSSSCG00000006495,ENSSSCG00000026412,ENSSSCG00000026383	HES1|SEMA4A|-|NRP2|
GO:0005654	nucleoplasm	cellular_component	0.021421	0.61282	11	66	374	4727	ENSSSCG00000016520,ENSSSCG00000021725,ENSSSCG00000010831,ENSSSCG00000023304,ENSSSCG00000022486,ENSSSCG00000028326,ENSSSCG00000008647,ENSSSCG00000026362,ENSSSCG00000009806,ENSSSCG00000005724,ENSSSCG00000001912	CREB3L2|PDS5B|DUSP10|SRRM2|CBLB|NR4A1|CMPK2|HES1|SETD1B|SETX|PML|
GO:0031345	negative regulation of cell projection organization	biological_process	0.021454	0.61282	2	66	15	4727	ENSSSCG00000022916,ENSSSCG00000006495	EVL|SEMA4A|
GO:0043412	macromolecule modification	biological_process	0.021478	0.61282	16	66	629	4727	ENSSSCG00000001912,ENSSSCG00000009997,ENSSSCG00000017146,ENSSSCG00000026362,ENSSSCG00000021712,ENSSSCG00000022486,ENSSSCG00000016925,ENSSSCG00000017148,ENSSSCG00000010831,ENSSSCG00000027982,ENSSSCG00000015071,ENSSSCG00000008796,ENSSSCG00000001050,ENSSSCG00000009806,ENSSSCG00000030548,ENSSSCG00000024996	PML|OSM|RNF213|HES1|HERC6|CBLB|PLK2|-|DUSP10|ISG15|SIK3|RBM47|EDN1|SETD1B|HERC5|-|
GO:0072358	cardiovascular system development	biological_process	0.021733	0.61688	6	66	145	4727	ENSSSCG00000001912,ENSSSCG00000001050,ENSSSCG00000023868,ENSSSCG00000026383,ENSSSCG00000026362,ENSSSCG00000006495	PML|EDN1|C3AR1|NRP2|HES1|SEMA4A|
GO:0072359	circulatory system development	biological_process	0.021733	0.61688	6	66	145	4727	ENSSSCG00000006495,ENSSSCG00000026362,ENSSSCG00000026383,ENSSSCG00000023868,ENSSSCG00000001912,ENSSSCG00000001050	SEMA4A|HES1|NRP2|C3AR1|PML|EDN1|
GO:0003674	molecular_function	molecular_function	0.022138	0.62676	64	66	4237	4727	ENSSSCG00000027219,ENSSSCG00000006495,ENSSSCG00000013835,ENSSSCG00000010453,ENSSSCG00000029531,ENSSSCG00000000623,ENSSSCG00000022916,ENSSSCG00000025716,ENSSSCG00000005724,ENSSSCG00000024220,ENSSSCG00000016925,ENSSSCG00000025932,ENSSSCG00000008648,ENSSSCG00000011547,ENSSSCG00000009806,ENSSSCG00000022912,ENSSSCG00000026552,ENSSSCG00000026336,ENSSSCG00000005738,ENSSSCG00000003797,ENSSSCG00000024996,…	AKAP7|SEMA4A|CASP14|IFIT1|-|BCL2L14|EVL|-|SETX|-|PLK2|AP1S3|RSAD2|CPNE9|SETD1B|NT5C3A|HIATL1|-|RALGDS|DIRAS3|-|-|CMPK2|HES1|TOR3A|C3AR1|PML|RNF213|F5|DUSP10|ISG15|-|CBLB|SRRM2|IFIT5|-|RBM47|EDN1|OAS1|PLXNA2|AQP3|IFIT3|MX1|KIAA0232|SLA-11|-|NR4A1|STAT1|NFKBIZ|SAMD9|OSM|PDS5B|-|-|HERC6|HERC5|DYNC1H1|CREB3L2|TNFSF13B|NRP2|IFIT2|SIDT2|MX2|SIK3|
GO:0051641	cellular localization	biological_process	0.022692	0.64081	13	66	478	4727	ENSSSCG00000026362,ENSSSCG00000002538,ENSSSCG00000012076,ENSSSCG00000015074,ENSSSCG00000009997,ENSSSCG00000001912,ENSSSCG00000001050,ENSSSCG00000016520,ENSSSCG00000012077,ENSSSCG00000008648,ENSSSCG00000010453,ENSSSCG00000025932,ENSSSCG00000026412	HES1|DYNC1H1|MX2|SIDT2|OSM|PML|EDN1|CREB3L2|MX1|RSAD2|IFIT1|AP1S3|-|
GO:0097159	organic cyclic compound binding	molecular_function	0.022789	0.64189	24	66	1135	4727	ENSSSCG00000009806,ENSSSCG00000022912,ENSSSCG00000010454,ENSSSCG00000026336,ENSSSCG00000008796,ENSSSCG00000010452,ENSSSCG00000009882,ENSSSCG00000024996,ENSSSCG00000003797,ENSSSCG00000016520,ENSSSCG00000012077,ENSSSCG00000010451,ENSSSCG00000024398,ENSSSCG00000010453,ENSSSCG00000026362,ENSSSCG00000016057,ENSSSCG00000012076,ENSSSCG00000028326,ENSSSCG00000025716,ENSSSCG00000015525,ENSSSCG00000017146,…	SETD1B|NT5C3A|IFIT5|-|RBM47|IFIT3|OAS1|-|DIRAS3|CREB3L2|MX1|IFIT2|-|IFIT1|HES1|STAT1|MX2|NR4A1|-|TOR3A|RNF213|SETX|PLK2|SIK3|
GO:0003014	renal system process	biological_process	0.023049	0.64644	2	66	16	4727	ENSSSCG00000010991,ENSSSCG00000001050	AQP3|EDN1|
GO:0060341	regulation of cellular localization	biological_process	0.023074	0.64644	6	66	151	4727	ENSSSCG00000009997,ENSSSCG00000008648,ENSSSCG00000001050,ENSSSCG00000001912,ENSSSCG00000012076,ENSSSCG00000015074	OSM|RSAD2|EDN1|PML|MX2|SIDT2|
GO:0050776	regulation of immune response	biological_process	0.02335	0.64644	4	66	79	4727	ENSSSCG00000029531,ENSSSCG00000010831,ENSSSCG00000024996,ENSSSCG00000008648	-|DUSP10|-|RSAD2|
GO:0090066	regulation of anatomical structure size	biological_process	0.023704	0.64644	4	66	74	4727	ENSSSCG00000006495,ENSSSCG00000001050,ENSSSCG00000022916,ENSSSCG00000026412	SEMA4A|EDN1|EVL|-|
GO:0097202	activation of cysteine-type endopeptidase activity	biological_process	0.023755	0.64644	2	66	16	4727	ENSSSCG00000001912,ENSSSCG00000013835	PML|CASP14|
GO:0045607	regulation of auditory receptor cell differentiation	biological_process	0.023835	0.64644	1	66	2	4727	ENSSSCG00000026362	HES1|
GO:0045608	negative regulation of auditory receptor cell differentiation	biological_process	0.023835	0.64644	1	66	2	4727	ENSSSCG00000026362	HES1|
GO:0045631	regulation of mechanoreceptor differentiation	biological_process	0.023835	0.64644	1	66	2	4727	ENSSSCG00000026362	HES1|
GO:0045632	negative regulation of mechanoreceptor differentiation	biological_process	0.023835	0.64644	1	66	2	4727	ENSSSCG00000026362	HES1|
GO:0046331	lateral inhibition	biological_process	0.023835	0.64644	1	66	2	4727	ENSSSCG00000026362	HES1|
GO:2000980	regulation of inner ear receptor cell differentiation	biological_process	0.023835	0.64644	1	66	2	4727	ENSSSCG00000026362	HES1|
GO:2000981	negative regulation of inner ear receptor cell differentiation	biological_process	0.023835	0.64644	1	66	2	4727	ENSSSCG00000026362	HES1|
GO:0003263	cardioblast proliferation	biological_process	0.023861	0.64644	1	66	2	4727	ENSSSCG00000026362	HES1|
GO:0003264	regulation of cardioblast proliferation	biological_process	0.023861	0.64644	1	66	2	4727	ENSSSCG00000026362	HES1|
GO:0003266	regulation of secondary heart field cardioblast proliferation	biological_process	0.023861	0.64644	1	66	2	4727	ENSSSCG00000026362	HES1|
GO:0002221	pattern recognition receptor signaling pathway	biological_process	0.023892	0.64644	2	66	16	4727	ENSSSCG00000024996,ENSSSCG00000008648	-|RSAD2|
GO:0048246	macrophage chemotaxis	biological_process	0.024092	0.65024	1	66	2	4727	ENSSSCG00000023868	C3AR1|
GO:0016874	ligase activity	molecular_function	0.024275	0.65359	5	66	106	4727	ENSSSCG00000030548,ENSSSCG00000017148,ENSSSCG00000017146,ENSSSCG00000022486,ENSSSCG00000021712	HERC5|-|RNF213|CBLB|HERC6|
GO:0043621	protein self-association	molecular_function	0.024501	0.65664	1	66	2	4727	ENSSSCG00000008648	RSAD2|
GO:0072049	comma-shaped body morphogenesis	biological_process	0.024568	0.65664	1	66	2	4727	ENSSSCG00000026362	HES1|
GO:0072282	metanephric nephron tubule morphogenesis	biological_process	0.024568	0.65664	1	66	2	4727	ENSSSCG00000026362	HES1|
GO:0045686	negative regulation of glial cell differentiation	biological_process	0.024889	0.66279	1	66	2	4727	ENSSSCG00000026362	HES1|
GO:0030578	PML body organization	biological_process	0.025159	0.66279	1	66	2	4727	ENSSSCG00000001912	PML|
GO:0043229	intracellular organelle	cellular_component	0.025239	0.66279	36	66	1889	4727	ENSSSCG00000022912,ENSSSCG00000002538,ENSSSCG00000009806,ENSSSCG00000005738,ENSSSCG00000016520,ENSSSCG00000010451,ENSSSCG00000024398,ENSSSCG00000026362,ENSSSCG00000008647,ENSSSCG00000012076,ENSSSCG00000015074,ENSSSCG00000001912,ENSSSCG00000015525,ENSSSCG00000010831,ENSSSCG00000006289,ENSSSCG00000023304,ENSSSCG00000022486,ENSSSCG00000013835,ENSSSCG00000010454,ENSSSCG00000027219,ENSSSCG00000010452,…	NT5C3A|DYNC1H1|SETD1B|RALGDS|CREB3L2|IFIT2|-|HES1|CMPK2|MX2|SIDT2|PML|TOR3A|DUSP10|F5|SRRM2|CBLB|CASP14|IFIT5|AKAP7|IFIT3|AQP3|OAS1|RBM47|MX1|BCL2L14|STAT1|NR4A1|-|SETX|SAMD9|NFKBIZ|PDS5B|PLK2|RSAD2|HERC6|
GO:0061101	neuroendocrine cell differentiation	biological_process	0.025331	0.66279	1	66	2	4727	ENSSSCG00000026362	HES1|
GO:0021855	hypothalamus cell migration	biological_process	0.025697	0.66279	1	66	2	4727	ENSSSCG00000026383	NRP2|
GO:0050897	cobalt ion binding	molecular_function	0.025702	0.66279	1	66	2	4727	ENSSSCG00000001912	PML|
GO:0021562	vestibulocochlear nerve development	biological_process	0.025797	0.66279	1	66	2	4727	ENSSSCG00000026383	NRP2|
GO:0007262	STAT protein import into nucleus	biological_process	0.025828	0.66279	1	66	2	4727	ENSSSCG00000026362	HES1|
GO:0021604	cranial nerve structural organization	biological_process	0.025962	0.66279	1	66	2	4727	ENSSSCG00000026383	NRP2|
GO:0000982	RNA polymerase II core promoter proximal region sequence-specific DNA binding transcription factor activity	molecular_function	0.026077	0.66279	3	66	47	4727	ENSSSCG00000028326,ENSSSCG00000016520,ENSSSCG00000026362	NR4A1|CREB3L2|HES1|
GO:1900028	negative regulation of ruffle assembly	biological_process	0.026083	0.66279	1	66	2	4727	ENSSSCG00000022916	EVL|
GO:0035886	vascular smooth muscle cell differentiation	biological_process	0.026089	0.66279	1	66	2	4727	ENSSSCG00000026362	HES1|
GO:0097084	vascular smooth muscle cell development	biological_process	0.026089	0.66279	1	66	2	4727	ENSSSCG00000026362	HES1|
GO:0050711	negative regulation of interleukin-1 secretion	biological_process	0.026207	0.66279	1	66	2	4727	ENSSSCG00000001912	PML|
GO:0050713	negative regulation of interleukin-1 beta secretion	biological_process	0.026207	0.66279	1	66	2	4727	ENSSSCG00000001912	PML|
GO:0021535	cell migration in hindbrain	biological_process	0.026229	0.66279	1	66	2	4727	ENSSSCG00000026412	-|
GO:0009219	pyrimidine deoxyribonucleotide metabolic process	biological_process	0.026247	0.66279	1	66	2	4727	ENSSSCG00000008647	CMPK2|
GO:0009221	pyrimidine deoxyribonucleotide biosynthetic process	biological_process	0.026247	0.66279	1	66	2	4727	ENSSSCG00000008647	CMPK2|
GO:0009263	deoxyribonucleotide biosynthetic process	biological_process	0.026247	0.66279	1	66	2	4727	ENSSSCG00000008647	CMPK2|
GO:0009265	2'-deoxyribonucleotide biosynthetic process	biological_process	0.026247	0.66279	1	66	2	4727	ENSSSCG00000008647	CMPK2|
GO:0046385	deoxyribose phosphate biosynthetic process	biological_process	0.026247	0.66279	1	66	2	4727	ENSSSCG00000008647	CMPK2|
GO:0002065	columnar/cuboidal epithelial cell differentiation	biological_process	0.026367	0.66279	2	66	17	4727	ENSSSCG00000026362,ENSSSCG00000015074	HES1|SIDT2|
GO:0097190	apoptotic signaling pathway	biological_process	0.026502	0.66279	4	66	80	4727	ENSSSCG00000009997,ENSSSCG00000001912,ENSSSCG00000013835,ENSSSCG00000000623	OSM|PML|CASP14|BCL2L14|
GO:0002758	innate immune response-activating signal transduction	biological_process	0.026548	0.66279	2	66	17	4727	ENSSSCG00000024996,ENSSSCG00000008648	-|RSAD2|
GO:0050691	regulation of defense response to virus by host	biological_process	0.026582	0.66279	2	66	16	4727	ENSSSCG00000001912,ENSSSCG00000010453	PML|IFIT1|
GO:0043065	positive regulation of apoptotic process	biological_process	0.026588	0.66279	3	66	43	4727	ENSSSCG00000028326,ENSSSCG00000010451,ENSSSCG00000001912	NR4A1|IFIT2|PML|
GO:0043068	positive regulation of programmed cell death	biological_process	0.026588	0.66279	3	66	43	4727	ENSSSCG00000010451,ENSSSCG00000001912,ENSSSCG00000028326	IFIT2|PML|NR4A1|
GO:0034976	response to endoplasmic reticulum stress	biological_process	0.026737	0.66279	2	66	18	4727	ENSSSCG00000001912,ENSSSCG00000016520	PML|CREB3L2|
GO:0009912	auditory receptor cell fate commitment	biological_process	0.02691	0.66279	1	66	2	4727	ENSSSCG00000026362	HES1|
GO:0040034	regulation of development, heterochronic	biological_process	0.02691	0.66279	1	66	2	4727	ENSSSCG00000026362	HES1|
GO:0048505	regulation of timing of cell differentiation	biological_process	0.02691	0.66279	1	66	2	4727	ENSSSCG00000026362	HES1|
GO:0060120	inner ear receptor cell fate commitment	biological_process	0.02691	0.66279	1	66	2	4727	ENSSSCG00000026362	HES1|
GO:1901532	regulation of hematopoietic progenitor cell differentiation	biological_process	0.02691	0.66279	1	66	2	4727	ENSSSCG00000026362	HES1|
GO:2000973	regulation of pro-B cell differentiation	biological_process	0.02691	0.66279	1	66	2	4727	ENSSSCG00000026362	HES1|
GO:0016310	phosphorylation	biological_process	0.02691	0.66279	10	66	337	4727	ENSSSCG00000026443,ENSSSCG00000008647,ENSSSCG00000026362,ENSSSCG00000001050,ENSSSCG00000001912,ENSSSCG00000009997,ENSSSCG00000016925,ENSSSCG00000010831,ENSSSCG00000024996,ENSSSCG00000015071	-|CMPK2|HES1|EDN1|PML|OSM|PLK2|DUSP10|-|SIK3|
GO:0050689	negative regulation of defense response to virus by host	biological_process	0.027023	0.6641	1	66	2	4727	ENSSSCG00000010453	IFIT1|
GO:0050789	regulation of biological process	biological_process	0.027306	0.66868	37	66	2130	4727	ENSSSCG00000026412,ENSSSCG00000022486,ENSSSCG00000010831,ENSSSCG00000027982,ENSSSCG00000001912,ENSSSCG00000023868,ENSSSCG00000015074,ENSSSCG00000026362,ENSSSCG00000012076,ENSSSCG00000010451,ENSSSCG00000026383,ENSSSCG00000024996,ENSSSCG00000003797,ENSSSCG00000016520,ENSSSCG00000005738,ENSSSCG00000030548,ENSSSCG00000008648,ENSSSCG00000021725,ENSSSCG00000016925,ENSSSCG00000022916,ENSSSCG00000011951,…	-|CBLB|DUSP10|ISG15|PML|C3AR1|SIDT2|HES1|MX2|IFIT2|NRP2|-|DIRAS3|CREB3L2|RALGDS|HERC5|RSAD2|PDS5B|PLK2|EVL|NFKBIZ|OSM|SETX|BCL2L14|STAT1|-|NR4A1|IFIT1|MX1|EDN1|IFIT3|AQP3|OAS1|PLXNA2|CASP14|SEMA4A|IFIT5|
GO:0031016	pancreas development	biological_process	0.027363	0.66868	2	66	17	4727	ENSSSCG00000015074,ENSSSCG00000026362	SIDT2|HES1|
GO:0001816	cytokine production	biological_process	0.02741	0.66868	4	66	79	4727	ENSSSCG00000027982,ENSSSCG00000008648,ENSSSCG00000023868,ENSSSCG00000001912	ISG15|RSAD2|C3AR1|PML|
GO:0031065	positive regulation of histone deacetylation	biological_process	0.027551	0.66868	1	66	2	4727	ENSSSCG00000001912	PML|
GO:0090312	positive regulation of protein deacetylation	biological_process	0.027551	0.66868	1	66	2	4727	ENSSSCG00000001912	PML|
GO:0003676	nucleic acid binding	molecular_function	0.027968	0.66868	15	66	648	4727	ENSSSCG00000026336,ENSSSCG00000008796,ENSSSCG00000025716,ENSSSCG00000005724,ENSSSCG00000009882,ENSSSCG00000010452,ENSSSCG00000009806,ENSSSCG00000010454,ENSSSCG00000028326,ENSSSCG00000016057,ENSSSCG00000026362,ENSSSCG00000024398,ENSSSCG00000010451,ENSSSCG00000010453,ENSSSCG00000016520	-|RBM47|-|SETX|OAS1|IFIT3|SETD1B|IFIT5|NR4A1|STAT1|HES1|-|IFIT2|IFIT1|CREB3L2|
GO:0006874	cellular calcium ion homeostasis	biological_process	0.027975	0.66868	3	66	43	4727	ENSSSCG00000023868,ENSSSCG00000001912,ENSSSCG00000001050	C3AR1|PML|EDN1|
GO:0001516	prostaglandin biosynthetic process	biological_process	0.028176	0.66868	1	66	2	4727	ENSSSCG00000001050	EDN1|
GO:0006692	prostanoid metabolic process	biological_process	0.028176	0.66868	1	66	2	4727	ENSSSCG00000001050	EDN1|
GO:0006693	prostaglandin metabolic process	biological_process	0.028176	0.66868	1	66	2	4727	ENSSSCG00000001050	EDN1|
GO:0046457	prostanoid biosynthetic process	biological_process	0.028176	0.66868	1	66	2	4727	ENSSSCG00000001050	EDN1|
GO:0015204	urea transmembrane transporter activity	molecular_function	0.028232	0.66868	1	66	2	4727	ENSSSCG00000010991	AQP3|
GO:0015840	urea transport	biological_process	0.028232	0.66868	1	66	2	4727	ENSSSCG00000010991	AQP3|
GO:0042887	amide transmembrane transporter activity	molecular_function	0.028232	0.66868	1	66	2	4727	ENSSSCG00000010991	AQP3|
GO:0071918	urea transmembrane transport	biological_process	0.028232	0.66868	1	66	2	4727	ENSSSCG00000010991	AQP3|
GO:0002218	activation of innate immune response	biological_process	0.028297	0.66868	2	66	18	4727	ENSSSCG00000024996,ENSSSCG00000008648	-|RSAD2|
GO:0010740	positive regulation of intracellular protein kinase cascade	biological_process	0.028324	0.66868	4	66	80	4727	ENSSSCG00000001050,ENSSSCG00000009997,ENSSSCG00000016925,ENSSSCG00000026362	EDN1|OSM|PLK2|HES1|
GO:0061307	cardiac neural crest cell differentiation involved in heart development	biological_process	0.02846	0.66868	1	66	3	4727	ENSSSCG00000026362	HES1|
GO:0061308	cardiac neural crest cell development involved in heart development	biological_process	0.02846	0.66868	1	66	3	4727	ENSSSCG00000026362	HES1|
GO:0007346	regulation of mitotic cell cycle	biological_process	0.028487	0.66868	4	66	77	4727	ENSSSCG00000026362,ENSSSCG00000016925,ENSSSCG00000001050,ENSSSCG00000001912	HES1|PLK2|EDN1|PML|
GO:0035812	renal sodium excretion	biological_process	0.028671	0.66868	1	66	2	4727	ENSSSCG00000001050	EDN1|
GO:0035813	regulation of renal sodium excretion	biological_process	0.028671	0.66868	1	66	2	4727	ENSSSCG00000001050	EDN1|
GO:0035815	positive regulation of renal sodium excretion	biological_process	0.028671	0.66868	1	66	2	4727	ENSSSCG00000001050	EDN1|
GO:0044062	regulation of excretion	biological_process	0.028671	0.66868	1	66	2	4727	ENSSSCG00000001050	EDN1|
GO:0046425	regulation of JAK-STAT cascade	biological_process	0.028948	0.67373	2	66	20	4727	ENSSSCG00000026362,ENSSSCG00000009997	HES1|OSM|
GO:0043280	positive regulation of cysteine-type endopeptidase activity involved in apoptotic process	biological_process	0.029152	0.67703	2	66	19	4727	ENSSSCG00000013835,ENSSSCG00000001912	CASP14|PML|
GO:0003100	regulation of systemic arterial blood pressure by endothelin	biological_process	0.029214	0.67703	1	66	2	4727	ENSSSCG00000001050	EDN1|
GO:0045787	positive regulation of cell cycle	biological_process	0.029453	0.68047	2	66	18	4727	ENSSSCG00000001050,ENSSSCG00000026362	EDN1|HES1|
GO:0007093	mitotic cell cycle checkpoint	biological_process	0.029486	0.68047	2	66	18	4727	ENSSSCG00000001912,ENSSSCG00000016925	PML|PLK2|
GO:0010948	negative regulation of cell cycle process	biological_process	0.029663	0.68252	3	66	45	4727	ENSSSCG00000016925,ENSSSCG00000009997,ENSSSCG00000001912	PLK2|OSM|PML|
GO:0006464	cellular protein modification process	biological_process	0.029925	0.68252	15	66	599	4727	ENSSSCG00000026362,ENSSSCG00000009806,ENSSSCG00000030548,ENSSSCG00000017146,ENSSSCG00000009997,ENSSSCG00000001050,ENSSSCG00000001912,ENSSSCG00000015071,ENSSSCG00000027982,ENSSSCG00000010831,ENSSSCG00000024996,ENSSSCG00000017148,ENSSSCG00000016925,ENSSSCG00000022486,ENSSSCG00000021712	HES1|SETD1B|HERC5|RNF213|OSM|EDN1|PML|SIK3|ISG15|DUSP10|-|-|PLK2|CBLB|HERC6|
GO:0036211	protein modification process	biological_process	0.029925	0.68252	15	66	599	4727	ENSSSCG00000009806,ENSSSCG00000030548,ENSSSCG00000026362,ENSSSCG00000001912,ENSSSCG00000001050,ENSSSCG00000017146,ENSSSCG00000009997,ENSSSCG00000016925,ENSSSCG00000010831,ENSSSCG00000024996,ENSSSCG00000017148,ENSSSCG00000015071,ENSSSCG00000027982,ENSSSCG00000022486,ENSSSCG00000021712	SETD1B|HERC5|HES1|PML|EDN1|RNF213|OSM|PLK2|DUSP10|-|-|SIK3|ISG15|CBLB|HERC6|
GO:0060024	rhythmic synaptic transmission	biological_process	0.029962	0.68252	1	66	2	4727	ENSSSCG00000001050	EDN1|
GO:0051767	nitric-oxide synthase biosynthetic process	biological_process	0.030072	0.68252	1	66	2	4727	ENSSSCG00000001050	EDN1|
GO:0051769	regulation of nitric-oxide synthase biosynthetic process	biological_process	0.030072	0.68252	1	66	2	4727	ENSSSCG00000001050	EDN1|
GO:0010869	regulation of receptor biosynthetic process	biological_process	0.030072	0.68252	1	66	2	4727	ENSSSCG00000001050	EDN1|
GO:0032800	receptor biosynthetic process	biological_process	0.030072	0.68252	1	66	2	4727	ENSSSCG00000001050	EDN1|
GO:0072503	cellular divalent inorganic cation homeostasis	biological_process	0.030156	0.68303	3	66	45	4727	ENSSSCG00000023868,ENSSSCG00000001912,ENSSSCG00000001050	C3AR1|PML|EDN1|
GO:0060700	regulation of ribonuclease activity	biological_process	0.030275	0.6843	1	66	2	4727	ENSSSCG00000009882	OAS1|
GO:0009041	uridylate kinase activity	molecular_function	0.030679	0.69201	1	66	2	4727	ENSSSCG00000008647	CMPK2|
GO:0021979	hypothalamus cell differentiation	biological_process	0.030958	0.69686	1	66	2	4727	ENSSSCG00000026383	NRP2|
GO:0044342	type B pancreatic cell proliferation	biological_process	0.031625	0.71044	1	66	2	4727	ENSSSCG00000015074	SIDT2|
GO:0045926	negative regulation of growth	biological_process	0.031843	0.71199	2	66	20	4727	ENSSSCG00000001912,ENSSSCG00000006495	PML|SEMA4A|
GO:0050793	regulation of developmental process	biological_process	0.031885	0.71199	9	66	304	4727	ENSSSCG00000005724,ENSSSCG00000001912,ENSSSCG00000001050,ENSSSCG00000023868,ENSSSCG00000006495,ENSSSCG00000026362,ENSSSCG00000026412,ENSSSCG00000027982,ENSSSCG00000010831	SETX|PML|EDN1|C3AR1|SEMA4A|HES1|-|ISG15|DUSP10|
GO:0051248	negative regulation of protein metabolic process	biological_process	0.031903	0.71199	4	66	82	4727	ENSSSCG00000001050,ENSSSCG00000001912,ENSSSCG00000010831,ENSSSCG00000027982	EDN1|PML|DUSP10|ISG15|
GO:0052548	regulation of endopeptidase activity	biological_process	0.031954	0.71199	3	66	50	4727	ENSSSCG00000028326,ENSSSCG00000013835,ENSSSCG00000001912	NR4A1|CASP14|PML|
GO:0010721	negative regulation of cell development	biological_process	0.032181	0.71265	2	66	19	4727	ENSSSCG00000026362,ENSSSCG00000006495	HES1|SEMA4A|
GO:0042406	extrinsic to endoplasmic reticulum membrane	cellular_component	0.032451	0.71265	1	66	2	4727	ENSSSCG00000001912	PML|
GO:0031348	negative regulation of defense response	biological_process	0.03253	0.71265	2	66	20	4727	ENSSSCG00000010831,ENSSSCG00000010453	DUSP10|IFIT1|
GO:1902187	negative regulation of viral release from host cell	biological_process	0.03261	0.71265	1	66	2	4727	ENSSSCG00000001912	PML|
GO:0035556	intracellular signal transduction	biological_process	0.032649	0.71265	11	66	398	4727	ENSSSCG00000003797,ENSSSCG00000016925,ENSSSCG00000010831,ENSSSCG00000024996,ENSSSCG00000026362,ENSSSCG00000013835,ENSSSCG00000005724,ENSSSCG00000009997,ENSSSCG00000005738,ENSSSCG00000001912,ENSSSCG00000001050	DIRAS3|PLK2|DUSP10|-|HES1|CASP14|SETX|OSM|RALGDS|PML|EDN1|
GO:0005522	profilin binding	molecular_function	0.032661	0.71265	1	66	2	4727	ENSSSCG00000022916	EVL|
GO:0071360	cellular response to exogenous dsRNA	biological_process	0.032798	0.71265	1	66	2	4727	ENSSSCG00000010453	IFIT1|
GO:0006858	extracellular transport	biological_process	0.032878	0.71265	1	66	2	4727	ENSSSCG00000010453	IFIT1|
GO:0019060	intracellular transport of viral proteins in host cell	biological_process	0.032878	0.71265	1	66	2	4727	ENSSSCG00000010453	IFIT1|
GO:0030581	symbiont intracellular protein transport in host	biological_process	0.032878	0.71265	1	66	2	4727	ENSSSCG00000010453	IFIT1|
GO:0051708	intracellular protein transport in other organism involved in symbiotic interaction	biological_process	0.032878	0.71265	1	66	2	4727	ENSSSCG00000010453	IFIT1|
GO:0014014	negative regulation of gliogenesis	biological_process	0.032994	0.71265	1	66	3	4727	ENSSSCG00000026362	HES1|
GO:0034162	toll-like receptor 9 signaling pathway	biological_process	0.033246	0.71265	1	66	2	4727	ENSSSCG00000008648	RSAD2|
GO:0016554	cytidine to uridine editing	biological_process	0.033353	0.71265	1	66	2	4727	ENSSSCG00000008796	RBM47|
GO:0055074	calcium ion homeostasis	biological_process	0.033368	0.71265	3	66	46	4727	ENSSSCG00000001912,ENSSSCG00000001050,ENSSSCG00000023868	PML|EDN1|C3AR1|
GO:0032101	regulation of response to external stimulus	biological_process	0.033424	0.71265	4	66	84	4727	ENSSSCG00000026412,ENSSSCG00000023868,ENSSSCG00000006495,ENSSSCG00000010831	-|C3AR1|SEMA4A|DUSP10|
GO:0010942	positive regulation of cell death	biological_process	0.033467	0.71265	3	66	48	4727	ENSSSCG00000028326,ENSSSCG00000001912,ENSSSCG00000010451	NR4A1|PML|IFIT2|
GO:0048188	Set1C/COMPASS complex	cellular_component	0.033482	0.71265	1	66	2	4727	ENSSSCG00000009806	SETD1B|
GO:0030215	semaphorin receptor binding	molecular_function	0.033599	0.71265	1	66	2	4727	ENSSSCG00000006495	SEMA4A|
GO:0048843	negative regulation of axon extension involved in axon guidance	biological_process	0.033599	0.71265	1	66	2	4727	ENSSSCG00000006495	SEMA4A|
GO:0030335	positive regulation of cell migration	biological_process	0.033642	0.71265	3	66	51	4727	ENSSSCG00000006495,ENSSSCG00000001050,ENSSSCG00000023868	SEMA4A|EDN1|C3AR1|
GO:0050770	regulation of axonogenesis	biological_process	0.03373	0.71265	2	66	19	4727	ENSSSCG00000006495,ENSSSCG00000026412	SEMA4A|-|
GO:0043243	positive regulation of protein complex disassembly	biological_process	0.033741	0.71265	1	66	2	4727	ENSSSCG00000005724	SETX|
GO:0035743	CD4-positive, alpha-beta T cell cytokine production	biological_process	0.033789	0.71265	1	66	2	4727	ENSSSCG00000008648	RSAD2|
GO:0035745	T-helper 2 cell cytokine production	biological_process	0.033789	0.71265	1	66	2	4727	ENSSSCG00000008648	RSAD2|
GO:0002724	regulation of T cell cytokine production	biological_process	0.033789	0.71265	1	66	2	4727	ENSSSCG00000008648	RSAD2|
GO:0002726	positive regulation of T cell cytokine production	biological_process	0.033789	0.71265	1	66	2	4727	ENSSSCG00000008648	RSAD2|
GO:0051216	cartilage development	biological_process	0.033848	0.71265	2	66	22	4727	ENSSSCG00000001050,ENSSSCG00000016520	EDN1|CREB3L2|
GO:0072141	renal interstitial cell development	biological_process	0.033865	0.71265	1	66	3	4727	ENSSSCG00000026362	HES1|
GO:0048468	cell development	biological_process	0.034142	0.71288	9	66	307	4727	ENSSSCG00000010831,ENSSSCG00000026383,ENSSSCG00000026412,ENSSSCG00000015074,ENSSSCG00000026362,ENSSSCG00000006495,ENSSSCG00000001912,ENSSSCG00000001050,ENSSSCG00000005724	DUSP10|NRP2|-|SIDT2|HES1|SEMA4A|PML|EDN1|SETX|
GO:0034063	stress granule assembly	biological_process	0.034155	0.71288	1	66	2	4727	ENSSSCG00000002538	DYNC1H1|
GO:0097374	sensory neuron axon guidance	biological_process	0.034297	0.71288	1	66	2	4727	ENSSSCG00000026383	NRP2|
GO:0000278	mitotic cell cycle	biological_process	0.034313	0.71288	5	66	122	4727	ENSSSCG00000001050,ENSSSCG00000001912,ENSSSCG00000026362,ENSSSCG00000016925,ENSSSCG00000021725	EDN1|PML|HES1|PLK2|PDS5B|
GO:0017017	MAP kinase tyrosine/serine/threonine phosphatase activity	molecular_function	0.03445	0.71288	1	66	3	4727	ENSSSCG00000010831	DUSP10|
GO:0033549	MAP kinase phosphatase activity	molecular_function	0.03445	0.71288	1	66	3	4727	ENSSSCG00000010831	DUSP10|
GO:0032183	SUMO binding	molecular_function	0.034632	0.71288	1	66	2	4727	ENSSSCG00000001912	PML|
GO:0072173	metanephric tubule morphogenesis	biological_process	0.034665	0.71288	1	66	3	4727	ENSSSCG00000026362	HES1|
GO:0032691	negative regulation of interleukin-1 beta production	biological_process	0.034811	0.71288	1	66	3	4727	ENSSSCG00000001912	PML|
GO:0032692	negative regulation of interleukin-1 production	biological_process	0.034811	0.71288	1	66	3	4727	ENSSSCG00000001912	PML|
GO:0048384	retinoic acid receptor signaling pathway	biological_process	0.034856	0.71288	1	66	2	4727	ENSSSCG00000001912	PML|
GO:0050878	regulation of body fluid levels	biological_process	0.034922	0.71288	3	66	50	4727	ENSSSCG00000001050,ENSSSCG00000010991,ENSSSCG00000006289	EDN1|AQP3|F5|
GO:0010761	fibroblast migration	biological_process	0.034979	0.71288	1	66	2	4727	ENSSSCG00000001912	PML|
GO:0051457	maintenance of protein location in nucleus	biological_process	0.034979	0.71288	1	66	2	4727	ENSSSCG00000001912	PML|
GO:0060057	apoptotic process involved in mammary gland involution	biological_process	0.034979	0.71288	1	66	2	4727	ENSSSCG00000001912	PML|
GO:0060058	positive regulation of apoptotic process involved in mammary gland involution	biological_process	0.034979	0.71288	1	66	2	4727	ENSSSCG00000001912	PML|
GO:1902339	positive regulation of apoptotic process involved in morphogenesis	biological_process	0.034979	0.71288	1	66	2	4727	ENSSSCG00000001912	PML|
GO:0044444	cytoplasmic part	cellular_component	0.03556	0.72123	22	66	1036	4727	ENSSSCG00000005738,ENSSSCG00000001050,ENSSSCG00000010452,ENSSSCG00000027219,ENSSSCG00000022912,ENSSSCG00000010454,ENSSSCG00000010451,ENSSSCG00000009542,ENSSSCG00000024398,ENSSSCG00000010453,ENSSSCG00000016520,ENSSSCG00000012077,ENSSSCG00000023868,ENSSSCG00000001912,ENSSSCG00000015525,ENSSSCG00000015074,ENSSSCG00000000623,ENSSSCG00000008647,ENSSSCG00000008648,ENSSSCG00000016925,ENSSSCG00000010831,…	RALGDS|EDN1|IFIT3|AKAP7|NT5C3A|IFIT5|IFIT2|TNFSF13B|-|IFIT1|CREB3L2|MX1|C3AR1|PML|TOR3A|SIDT2|BCL2L14|CMPK2|RSAD2|PLK2|DUSP10|F5|
GO:0010632	regulation of epithelial cell migration	biological_process	0.035605	0.72123	2	66	20	4727	ENSSSCG00000022916,ENSSSCG00000006495	EVL|SEMA4A|
GO:0021602	cranial nerve morphogenesis	biological_process	0.035642	0.72123	1	66	3	4727	ENSSSCG00000026383	NRP2|
GO:0045835	negative regulation of meiosis	biological_process	0.035651	0.72123	1	66	3	4727	ENSSSCG00000009997	OSM|
GO:0072507	divalent inorganic cation homeostasis	biological_process	0.035758	0.72205	3	66	48	4727	ENSSSCG00000001050,ENSSSCG00000001912,ENSSSCG00000023868	EDN1|PML|C3AR1|
GO:2001056	positive regulation of cysteine-type endopeptidase activity	biological_process	0.036121	0.72363	2	66	21	4727	ENSSSCG00000013835,ENSSSCG00000001912	CASP14|PML|
GO:0034599	cellular response to oxidative stress	biological_process	0.036208	0.72363	2	66	20	4727	ENSSSCG00000005724,ENSSSCG00000001912	SETX|PML|
GO:0002328	pro-B cell differentiation	biological_process	0.036226	0.72363	1	66	3	4727	ENSSSCG00000026362	HES1|
GO:0008631	intrinsic apoptotic signaling pathway in response to oxidative stress	biological_process	0.036385	0.72363	1	66	3	4727	ENSSSCG00000001912	PML|
GO:0007259	JAK-STAT cascade	biological_process	0.036414	0.72363	2	66	22	4727	ENSSSCG00000026362,ENSSSCG00000009997	HES1|OSM|
GO:0032502	developmental process	biological_process	0.036479	0.72363	18	66	799	4727	ENSSSCG00000026383,ENSSSCG00000016520,ENSSSCG00000008796,ENSSSCG00000001050,ENSSSCG00000010991,ENSSSCG00000006495,ENSSSCG00000026412,ENSSSCG00000021712,ENSSSCG00000008648,ENSSSCG00000010831,ENSSSCG00000027982,ENSSSCG00000023868,ENSSSCG00000001912,ENSSSCG00000009997,ENSSSCG00000005724,ENSSSCG00000015074,ENSSSCG00000028326,ENSSSCG00000026362	NRP2|CREB3L2|RBM47|EDN1|AQP3|SEMA4A|-|HERC6|RSAD2|DUSP10|ISG15|C3AR1|PML|OSM|SETX|SIDT2|NR4A1|HES1|
GO:0071855	neuropeptide receptor binding	molecular_function	0.036505	0.72363	1	66	3	4727	ENSSSCG00000001050	EDN1|
GO:0048710	regulation of astrocyte differentiation	biological_process	0.036528	0.72363	1	66	3	4727	ENSSSCG00000026362	HES1|
GO:0048711	positive regulation of astrocyte differentiation	biological_process	0.036528	0.72363	1	66	3	4727	ENSSSCG00000026362	HES1|
GO:0014821	phasic smooth muscle contraction	biological_process	0.036556	0.72363	1	66	3	4727	ENSSSCG00000001050	EDN1|
GO:0042110	T cell activation	biological_process	0.036695	0.72363	3	66	49	4727	ENSSSCG00000026362,ENSSSCG00000006495,ENSSSCG00000008648	HES1|SEMA4A|RSAD2|
GO:0097153	cysteine-type endopeptidase activity involved in apoptotic process	molecular_function	0.036725	0.72363	1	66	3	4727	ENSSSCG00000013835	CASP14|
GO:0097199	cysteine-type endopeptidase activity involved in apoptotic signaling pathway	molecular_function	0.036725	0.72363	1	66	3	4727	ENSSSCG00000013835	CASP14|
GO:0007064	mitotic sister chromatid cohesion	biological_process	0.036815	0.72363	1	66	3	4727	ENSSSCG00000021725	PDS5B|
GO:0005783	endoplasmic reticulum	cellular_component	0.036824	0.72363	6	66	164	4727	ENSSSCG00000022912,ENSSSCG00000016520,ENSSSCG00000008648,ENSSSCG00000001912,ENSSSCG00000010451,ENSSSCG00000015525	NT5C3A|CREB3L2|RSAD2|PML|IFIT2|TOR3A|
GO:0051649	establishment of localization in cell	biological_process	0.037141	0.7268	11	66	409	4727	ENSSSCG00000009997,ENSSSCG00000001912,ENSSSCG00000001050,ENSSSCG00000026362,ENSSSCG00000012076,ENSSSCG00000002538,ENSSSCG00000015074,ENSSSCG00000010453,ENSSSCG00000008648,ENSSSCG00000025932,ENSSSCG00000016520	OSM|PML|EDN1|HES1|MX2|DYNC1H1|SIDT2|IFIT1|RSAD2|AP1S3|CREB3L2|
GO:0035809	regulation of urine volume	biological_process	0.037334	0.7268	1	66	3	4727	ENSSSCG00000001050	EDN1|
GO:0035810	positive regulation of urine volume	biological_process	0.037334	0.7268	1	66	3	4727	ENSSSCG00000001050	EDN1|
GO:0050704	regulation of interleukin-1 secretion	biological_process	0.037571	0.7268	1	66	3	4727	ENSSSCG00000001912	PML|
GO:0050706	regulation of interleukin-1 beta secretion	biological_process	0.037571	0.7268	1	66	3	4727	ENSSSCG00000001912	PML|
GO:0010460	positive regulation of heart rate	biological_process	0.037663	0.7268	1	66	3	4727	ENSSSCG00000001050	EDN1|
GO:0045823	positive regulation of heart contraction	biological_process	0.037663	0.7268	1	66	3	4727	ENSSSCG00000001050	EDN1|
GO:0004127	cytidylate kinase activity	molecular_function	0.037729	0.7268	1	66	3	4727	ENSSSCG00000008647	CMPK2|
GO:0051224	negative regulation of protein transport	biological_process	0.037837	0.7268	2	66	21	4727	ENSSSCG00000001912,ENSSSCG00000008648	PML|RSAD2|
GO:0042605	peptide antigen binding	molecular_function	0.037876	0.7268	1	66	3	4727	ENSSSCG00000001341	SLA-11|
GO:0010627	regulation of intracellular protein kinase cascade	biological_process	0.037942	0.7268	5	66	128	4727	ENSSSCG00000016925,ENSSSCG00000010831,ENSSSCG00000026362,ENSSSCG00000001050,ENSSSCG00000009997	PLK2|DUSP10|HES1|EDN1|OSM|
GO:0044092	negative regulation of molecular function	biological_process	0.037963	0.7268	5	66	133	4727	ENSSSCG00000010453,ENSSSCG00000010451,ENSSSCG00000001912,ENSSSCG00000028326,ENSSSCG00000010831	IFIT1|IFIT2|PML|NR4A1|DUSP10|
GO:0006796	phosphate-containing compound metabolic process	biological_process	0.037998	0.7268	14	66	564	4727	ENSSSCG00000024996,ENSSSCG00000010831,ENSSSCG00000016925,ENSSSCG00000015071,ENSSSCG00000026443,ENSSSCG00000008647,ENSSSCG00000029531,ENSSSCG00000022912,ENSSSCG00000026362,ENSSSCG00000001912,ENSSSCG00000005738,ENSSSCG00000001050,ENSSSCG00000009882,ENSSSCG00000009997	-|DUSP10|PLK2|SIK3|-|CMPK2|-|NT5C3A|HES1|PML|RALGDS|EDN1|OAS1|OSM|
GO:0051272	positive regulation of cellular component movement	biological_process	0.038014	0.7268	3	66	55	4727	ENSSSCG00000006495,ENSSSCG00000001050,ENSSSCG00000023868	SEMA4A|EDN1|C3AR1|
GO:2000147	positive regulation of cell motility	biological_process	0.038014	0.7268	3	66	55	4727	ENSSSCG00000006495,ENSSSCG00000023868,ENSSSCG00000001050	SEMA4A|C3AR1|EDN1|
GO:0045646	regulation of erythrocyte differentiation	biological_process	0.038157	0.7268	1	66	3	4727	ENSSSCG00000027982	ISG15|
GO:0033500	carbohydrate homeostasis	biological_process	0.038176	0.7268	2	66	22	4727	ENSSSCG00000015074,ENSSSCG00000009882	SIDT2|OAS1|
GO:0042593	glucose homeostasis	biological_process	0.038176	0.7268	2	66	22	4727	ENSSSCG00000015074,ENSSSCG00000009882	SIDT2|OAS1|
GO:0010975	regulation of neuron projection development	biological_process	0.038375	0.72787	3	66	47	4727	ENSSSCG00000005724,ENSSSCG00000026412,ENSSSCG00000006495	SETX|-|SEMA4A|
GO:0070742	C2H2 zinc finger domain binding	molecular_function	0.038395	0.72787	1	66	3	4727	ENSSSCG00000023304	SRRM2|
GO:0006793	phosphorus metabolic process	biological_process	0.038554	0.72787	14	66	565	4727	ENSSSCG00000001050,ENSSSCG00000005738,ENSSSCG00000001912,ENSSSCG00000009997,ENSSSCG00000009882,ENSSSCG00000026443,ENSSSCG00000029531,ENSSSCG00000008647,ENSSSCG00000026362,ENSSSCG00000022912,ENSSSCG00000016925,ENSSSCG00000010831,ENSSSCG00000024996,ENSSSCG00000015071	EDN1|RALGDS|PML|OSM|OAS1|-|-|CMPK2|HES1|NT5C3A|PLK2|DUSP10|-|SIK3|
GO:0097150	neuronal stem cell maintenance	biological_process	0.038562	0.72787	1	66	3	4727	ENSSSCG00000026362	HES1|
GO:0010564	regulation of cell cycle process	biological_process	0.038564	0.72787	4	66	88	4727	ENSSSCG00000016925,ENSSSCG00000001912,ENSSSCG00000001050,ENSSSCG00000009997	PLK2|PML|EDN1|OSM|
GO:1901700	response to oxygen-containing compound	biological_process	0.03863	0.72787	6	66	167	4727	ENSSSCG00000015074,ENSSSCG00000010831,ENSSSCG00000008647,ENSSSCG00000028326,ENSSSCG00000010991,ENSSSCG00000005724	SIDT2|DUSP10|CMPK2|NR4A1|AQP3|SETX|
GO:0030575	nuclear body organization	biological_process	0.039139	0.73621	1	66	3	4727	ENSSSCG00000001912	PML|
GO:0010950	positive regulation of endopeptidase activity	biological_process	0.039267	0.73735	2	66	22	4727	ENSSSCG00000001912,ENSSSCG00000013835	PML|CASP14|
GO:0021536	diencephalon development	biological_process	0.03945	0.73951	2	66	22	4727	ENSSSCG00000026362,ENSSSCG00000026383	HES1|NRP2|
GO:0060562	epithelial tube morphogenesis	biological_process	0.039865	0.74571	3	66	50	4727	ENSSSCG00000001912,ENSSSCG00000001050,ENSSSCG00000026362	PML|EDN1|HES1|
GO:0010611	regulation of cardiac muscle hypertrophy	biological_process	0.039984	0.74571	1	66	3	4727	ENSSSCG00000001050	EDN1|
GO:0014743	regulation of muscle hypertrophy	biological_process	0.039984	0.74571	1	66	3	4727	ENSSSCG00000001050	EDN1|
GO:0044767	single-organism developmental process	biological_process	0.040254	0.74947	16	66	685	4727	ENSSSCG00000026412,ENSSSCG00000008648,ENSSSCG00000021712,ENSSSCG00000010831,ENSSSCG00000027982,ENSSSCG00000001912,ENSSSCG00000023868,ENSSSCG00000005724,ENSSSCG00000015074,ENSSSCG00000026362,ENSSSCG00000028326,ENSSSCG00000026383,ENSSSCG00000001050,ENSSSCG00000008796,ENSSSCG00000010991,ENSSSCG00000006495	-|RSAD2|HERC6|DUSP10|ISG15|PML|C3AR1|SETX|SIDT2|HES1|NR4A1|NRP2|EDN1|RBM47|AQP3|SEMA4A|
GO:0021903	rostrocaudal neural tube patterning	biological_process	0.040446	0.75036	1	66	3	4727	ENSSSCG00000026362	HES1|
GO:0030917	midbrain-hindbrain boundary development	biological_process	0.040446	0.75036	1	66	3	4727	ENSSSCG00000026362	HES1|
GO:0042802	identical protein binding	molecular_function	0.040663	0.75036	6	66	170	4727	ENSSSCG00000010451,ENSSSCG00000001912,ENSSSCG00000010452,ENSSSCG00000005724,ENSSSCG00000026362,ENSSSCG00000028326	IFIT2|PML|IFIT3|SETX|HES1|NR4A1|
GO:0031063	regulation of histone deacetylation	biological_process	0.040987	0.75036	1	66	3	4727	ENSSSCG00000001912	PML|
GO:0090311	regulation of protein deacetylation	biological_process	0.040987	0.75036	1	66	3	4727	ENSSSCG00000001912	PML|
GO:0032102	negative regulation of response to external stimulus	biological_process	0.04104	0.75036	2	66	22	4727	ENSSSCG00000010831,ENSSSCG00000006495	DUSP10|SEMA4A|
GO:0072148	epithelial cell fate commitment	biological_process	0.041064	0.75036	1	66	3	4727	ENSSSCG00000026362	HES1|
GO:0045605	negative regulation of epidermal cell differentiation	biological_process	0.041064	0.75036	1	66	3	4727	ENSSSCG00000026362	HES1|
GO:0001709	cell fate determination	biological_process	0.04109	0.75036	1	66	3	4727	ENSSSCG00000026362	HES1|
GO:0061323	cell proliferation involved in heart morphogenesis	biological_process	0.04109	0.75036	1	66	3	4727	ENSSSCG00000026362	HES1|
GO:2000136	regulation of cell proliferation involved in heart morphogenesis	biological_process	0.04109	0.75036	1	66	3	4727	ENSSSCG00000026362	HES1|
GO:0052547	regulation of peptidase activity	biological_process	0.041121	0.75036	3	66	55	4727	ENSSSCG00000001912,ENSSSCG00000013835,ENSSSCG00000028326	PML|CASP14|NR4A1|
GO:0016553	base conversion or substitution editing	biological_process	0.041286	0.75212	1	66	3	4727	ENSSSCG00000008796	RBM47|
GO:0042612	MHC class I protein complex	cellular_component	0.041358	0.75217	1	66	3	4727	ENSSSCG00000001341	SLA-11|
GO:0010817	regulation of hormone levels	biological_process	0.041675	0.7567	3	66	56	4727	ENSSSCG00000015074,ENSSSCG00000001050,ENSSSCG00000009997	SIDT2|EDN1|OSM|
GO:0072050	S-shaped body morphogenesis	biological_process	0.041785	0.75743	1	66	3	4727	ENSSSCG00000026362	HES1|
GO:0003727	single-stranded RNA binding	molecular_function	0.042063	0.75812	1	66	3	4727	ENSSSCG00000010454	IFIT5|
GO:0032587	ruffle membrane	cellular_component	0.042148	0.75812	1	66	3	4727	ENSSSCG00000010454	IFIT5|
GO:0035239	tube morphogenesis	biological_process	0.042231	0.75812	3	66	51	4727	ENSSSCG00000001912,ENSSSCG00000001050,ENSSSCG00000026362	PML|EDN1|HES1|
GO:0051100	negative regulation of binding	biological_process	0.042557	0.75812	2	66	24	4727	ENSSSCG00000010451,ENSSSCG00000010453	IFIT2|IFIT1|
GO:0043231	intracellular membrane-bounded organelle	cellular_component	0.04262	0.75812	32	66	1688	4727	ENSSSCG00000005724,ENSSSCG00000027372,ENSSSCG00000011951,ENSSSCG00000029531,ENSSSCG00000028326,ENSSSCG00000016057,ENSSSCG00000021712,ENSSSCG00000008648,ENSSSCG00000021725,ENSSSCG00000008796,ENSSSCG00000009882,ENSSSCG00000010991,ENSSSCG00000010452,ENSSSCG00000027219,ENSSSCG00000010454,ENSSSCG00000013835,ENSSSCG00000012077,ENSSSCG00000015525,ENSSSCG00000001912,ENSSSCG00000015074,ENSSSCG00000008647,…	SETX|SAMD9|NFKBIZ|-|NR4A1|STAT1|HERC6|RSAD2|PDS5B|RBM47|OAS1|AQP3|IFIT3|AKAP7|IFIT5|CASP14|MX1|TOR3A|PML|SIDT2|CMPK2|MX2|HES1|SRRM2|CBLB|F5|DUSP10|RALGDS|SETD1B|NT5C3A|IFIT2|CREB3L2|
GO:0065007	biological regulation	biological_process	0.042678	0.75812	38	66	2253	4727	ENSSSCG00000009997,ENSSSCG00000005724,ENSSSCG00000011951,ENSSSCG00000022916,ENSSSCG00000029531,ENSSSCG00000028326,ENSSSCG00000016057,ENSSSCG00000000623,ENSSSCG00000008648,ENSSSCG00000021725,ENSSSCG00000016925,ENSSSCG00000015621,ENSSSCG00000009882,ENSSSCG00000010991,ENSSSCG00000010452,ENSSSCG00000001050,ENSSSCG00000010454,ENSSSCG00000013835,ENSSSCG00000006495,ENSSSCG00000010453,ENSSSCG00000012077,…	OSM|SETX|NFKBIZ|EVL|-|NR4A1|STAT1|BCL2L14|RSAD2|PDS5B|PLK2|PLXNA2|OAS1|AQP3|IFIT3|EDN1|IFIT5|CASP14|SEMA4A|IFIT1|MX1|PML|C3AR1|MX2|HES1|SIDT2|CBLB|-|ISG15|F5|DUSP10|RALGDS|HERC5|NRP2|IFIT2|CREB3L2|DIRAS3|-|
GO:0070670	response to interleukin-4	biological_process	0.042679	0.75812	1	66	3	4727	ENSSSCG00000001912	PML|
GO:0071353	cellular response to interleukin-4	biological_process	0.042679	0.75812	1	66	3	4727	ENSSSCG00000001912	PML|
GO:0044763	single-organism cellular process	biological_process	0.042699	0.75812	42	66	2508	4727	ENSSSCG00000001912,ENSSSCG00000023868,ENSSSCG00000008647,ENSSSCG00000012076,ENSSSCG00000026362,ENSSSCG00000015074,ENSSSCG00000022486,ENSSSCG00000026412,ENSSSCG00000027982,ENSSSCG00000010831,ENSSSCG00000026552,ENSSSCG00000005738,ENSSSCG00000002538,ENSSSCG00000009806,ENSSSCG00000026383,ENSSSCG00000010451,ENSSSCG00000016520,ENSSSCG00000003797,ENSSSCG00000024996,ENSSSCG00000009997,ENSSSCG00000005724,…	PML|C3AR1|CMPK2|MX2|HES1|SIDT2|CBLB|-|ISG15|DUSP10|HIATL1|RALGDS|DYNC1H1|SETD1B|NRP2|IFIT2|CREB3L2|DIRAS3|-|OSM|SETX|EVL|NR4A1|BCL2L14|STAT1|RSAD2|HERC6|AP1S3|PLK2|PDS5B|AQP3|PLXNA2|OAS1|IFIT3|RBM47|EDN1|IFIT5|CASP14|-|SEMA4A|IFIT1|MX1|
GO:0006875	cellular metal ion homeostasis	biological_process	0.042756	0.75812	3	66	53	4727	ENSSSCG00000001912,ENSSSCG00000023868,ENSSSCG00000001050	PML|C3AR1|EDN1|
GO:0006353	DNA-dependent transcription, termination	biological_process	0.042861	0.75812	1	66	3	4727	ENSSSCG00000005724	SETX|
GO:0070293	renal absorption	biological_process	0.042915	0.75812	1	66	3	4727	ENSSSCG00000010991	AQP3|
GO:0070295	renal water absorption	biological_process	0.042915	0.75812	1	66	3	4727	ENSSSCG00000010991	AQP3|
GO:0043388	positive regulation of DNA binding	biological_process	0.042976	0.75812	1	66	4	4727	ENSSSCG00000026362	HES1|
GO:0048485	sympathetic nervous system development	biological_process	0.043003	0.75812	1	66	3	4727	ENSSSCG00000026383	NRP2|
GO:0050767	regulation of neurogenesis	biological_process	0.043186	0.75812	4	66	89	4727	ENSSSCG00000005724,ENSSSCG00000026412,ENSSSCG00000026362,ENSSSCG00000006495	SETX|-|HES1|SEMA4A|
GO:0046719	regulation by virus of viral protein levels in host cell	biological_process	0.043385	0.75812	1	66	3	4727	ENSSSCG00000010453	IFIT1|
GO:0071622	regulation of granulocyte chemotaxis	biological_process	0.043436	0.75812	1	66	4	4727	ENSSSCG00000023868	C3AR1|
GO:0071624	positive regulation of granulocyte chemotaxis	biological_process	0.043436	0.75812	1	66	4	4727	ENSSSCG00000023868	C3AR1|
GO:0090022	regulation of neutrophil chemotaxis	biological_process	0.043436	0.75812	1	66	4	4727	ENSSSCG00000023868	C3AR1|
GO:0090023	positive regulation of neutrophil chemotaxis	biological_process	0.043436	0.75812	1	66	4	4727	ENSSSCG00000023868	C3AR1|
GO:0040017	positive regulation of locomotion	biological_process	0.043463	0.75812	3	66	58	4727	ENSSSCG00000001050,ENSSSCG00000023868,ENSSSCG00000006495	EDN1|C3AR1|SEMA4A|
GO:0001784	phosphotyrosine binding	molecular_function	0.043479	0.75812	1	66	3	4727	ENSSSCG00000022486	CBLB|
GO:0045309	protein phosphorylated amino acid binding	molecular_function	0.043479	0.75812	1	66	3	4727	ENSSSCG00000022486	CBLB|
GO:0022402	cell cycle process	biological_process	0.043623	0.75863	6	66	175	4727	ENSSSCG00000001050,ENSSSCG00000001912,ENSSSCG00000009997,ENSSSCG00000021725,ENSSSCG00000016925,ENSSSCG00000002538	EDN1|PML|OSM|PDS5B|PLK2|DYNC1H1|
GO:0050687	negative regulation of defense response to virus	biological_process	0.043687	0.75863	1	66	3	4727	ENSSSCG00000010453	IFIT1|
GO:0009931	calcium-dependent protein serine/threonine kinase activity	molecular_function	0.043856	0.75863	1	66	3	4727	ENSSSCG00000024996	-|
GO:0010857	calcium-dependent protein kinase activity	molecular_function	0.043856	0.75863	1	66	3	4727	ENSSSCG00000024996	-|
GO:0005164	tumor necrosis factor receptor binding	molecular_function	0.043868	0.75863	1	66	4	4727	ENSSSCG00000009542	TNFSF13B|
GO:0072078	nephron tubule morphogenesis	biological_process	0.043967	0.75863	1	66	4	4727	ENSSSCG00000026362	HES1|
GO:0035909	aorta morphogenesis	biological_process	0.043992	0.75863	1	66	3	4727	ENSSSCG00000026362	HES1|
GO:0075733	intracellular transport of viral material	biological_process	0.044074	0.75873	1	66	3	4727	ENSSSCG00000012077	MX1|
GO:0048016	inositol phosphate-mediated signaling	biological_process	0.044136	0.75873	1	66	3	4727	ENSSSCG00000001050	EDN1|
GO:0043393	regulation of protein binding	biological_process	0.044341	0.76107	2	66	24	4727	ENSSSCG00000010453,ENSSSCG00000010451	IFIT1|IFIT2|
GO:0051482	elevation of cytosolic calcium ion concentration involved in phospholipase C-activating G-protein coupled signaling pathway	biological_process	0.044755	0.76698	1	66	3	4727	ENSSSCG00000001050	EDN1|
GO:0008643	carbohydrate transport	biological_process	0.044901	0.76828	2	66	25	4727	ENSSSCG00000001050,ENSSSCG00000010991	EDN1|AQP3|
GO:0048265	response to pain	biological_process	0.045014	0.76901	1	66	3	4727	ENSSSCG00000009997	OSM|
GO:0051974	negative regulation of telomerase activity	biological_process	0.04542	0.77321	1	66	3	4727	ENSSSCG00000001912	PML|
GO:0008045	motor neuron axon guidance	biological_process	0.045465	0.77321	1	66	3	4727	ENSSSCG00000026412	-|
GO:0003001	generation of a signal involved in cell-cell signaling	biological_process	0.045541	0.77321	3	66	56	4727	ENSSSCG00000001050,ENSSSCG00000009997,ENSSSCG00000015074	EDN1|OSM|SIDT2|
GO:0023061	signal release	biological_process	0.045541	0.77321	3	66	56	4727	ENSSSCG00000001050,ENSSSCG00000009997,ENSSSCG00000015074	EDN1|OSM|SIDT2|
GO:0040020	regulation of meiosis	biological_process	0.045917	0.77839	1	66	4	4727	ENSSSCG00000009997	OSM|
GO:0031312	extrinsic to organelle membrane	cellular_component	0.046171	0.78149	1	66	3	4727	ENSSSCG00000001912	PML|
GO:0014820	tonic smooth muscle contraction	biological_process	0.046697	0.78797	1	66	3	4727	ENSSSCG00000001050	EDN1|
GO:0014824	artery smooth muscle contraction	biological_process	0.046697	0.78797	1	66	3	4727	ENSSSCG00000001050	EDN1|
GO:0021854	hypothalamus development	biological_process	0.046802	0.78852	1	66	4	4727	ENSSSCG00000026383	NRP2|
GO:0007623	circadian rhythm	biological_process	0.047264	0.79046	2	66	23	4727	ENSSSCG00000005724,ENSSSCG00000001912	SETX|PML|
GO:0007409	axonogenesis	biological_process	0.047305	0.79046	3	66	54	4727	ENSSSCG00000006495,ENSSSCG00000026383,ENSSSCG00000026412	SEMA4A|NRP2|-|
GO:0018995	host	cellular_component	0.047492	0.79046	1	66	3	4727	ENSSSCG00000010453	IFIT1|
GO:0043245	extraorganismal space	cellular_component	0.047492	0.79046	1	66	3	4727	ENSSSCG00000010453	IFIT1|
GO:0043657	host cell	cellular_component	0.047492	0.79046	1	66	3	4727	ENSSSCG00000010453	IFIT1|
GO:0044215	other organism	cellular_component	0.047492	0.79046	1	66	3	4727	ENSSSCG00000010453	IFIT1|
GO:0044216	other organism cell	cellular_component	0.047492	0.79046	1	66	3	4727	ENSSSCG00000010453	IFIT1|
GO:0044217	other organism part	cellular_component	0.047492	0.79046	1	66	3	4727	ENSSSCG00000010453	IFIT1|
GO:0010952	positive regulation of peptidase activity	biological_process	0.047604	0.79112	2	66	24	4727	ENSSSCG00000013835,ENSSSCG00000001912	CASP14|PML|
GO:0051240	positive regulation of multicellular organismal process	biological_process	0.048003	0.79654	4	66	94	4727	ENSSSCG00000001912,ENSSSCG00000001050,ENSSSCG00000023868,ENSSSCG00000008648	PML|EDN1|C3AR1|RSAD2|
GO:0048713	regulation of oligodendrocyte differentiation	biological_process	0.048204	0.79867	1	66	4	4727	ENSSSCG00000026362	HES1|
GO:2001233	regulation of apoptotic signaling pathway	biological_process	0.048312	0.79925	3	66	56	4727	ENSSSCG00000009997,ENSSSCG00000001912,ENSSSCG00000000623	OSM|PML|BCL2L14|
GO:2000026	regulation of multicellular organismal development	biological_process	0.048557	0.80211	7	66	231	4727	ENSSSCG00000005724,ENSSSCG00000023868,ENSSSCG00000001912,ENSSSCG00000026412,ENSSSCG00000027982,ENSSSCG00000006495,ENSSSCG00000026362	SETX|C3AR1|PML|-|ISG15|SEMA4A|HES1|
GO:0060037	pharyngeal system development	biological_process	0.049045	0.80827	1	66	3	4727	ENSSSCG00000026412	-|
GO:0005488	binding	molecular_function	0.049077	0.80827	53	66	3247	4727	ENSSSCG00000001912,ENSSSCG00000015525,ENSSSCG00000017146,ENSSSCG00000026362,ENSSSCG00000012076,ENSSSCG00000026412,ENSSSCG00000022486,ENSSSCG00000023304,ENSSSCG00000006289,ENSSSCG00000015071,ENSSSCG00000027982,ENSSSCG00000005738,ENSSSCG00000026336,ENSSSCG00000009806,ENSSSCG00000030548,ENSSSCG00000022912,ENSSSCG00000002538,ENSSSCG00000010451,ENSSSCG00000026383,ENSSSCG00000024398,ENSSSCG00000009542,…	PML|TOR3A|RNF213|HES1|MX2|-|CBLB|SRRM2|F5|SIK3|ISG15|RALGDS|-|SETD1B|HERC5|NT5C3A|DYNC1H1|IFIT2|NRP2|-|TNFSF13B|-|DIRAS3|CREB3L2|EVL|-|OSM|SETX|NFKBIZ|SAMD9|BCL2L14|STAT1|NR4A1|AP1S3|CPNE9|RSAD2|PLK2|-|PDS5B|-|EDN1|RBM47|IFIT3|OAS1|PLXNA2|AKAP7|CASP14|-|SEMA4A|IFIT5|SLA-11|IFIT1|MX1|
GO:0016772	transferase activity, transferring phosphorus-containing groups	molecular_function	0.04933	0.81065	7	66	220	4727	ENSSSCG00000015071,ENSSSCG00000008647,ENSSSCG00000016925,ENSSSCG00000024996,ENSSSCG00000026443,ENSSSCG00000009882,ENSSSCG00000026383	SIK3|CMPK2|PLK2|-|-|OAS1|NRP2|
GO:0060561	apoptotic process involved in morphogenesis	biological_process	0.049732	0.81065	1	66	3	4727	ENSSSCG00000001912	PML|
GO:1902337	regulation of apoptotic process involved in morphogenesis	biological_process	0.049732	0.81065	1	66	3	4727	ENSSSCG00000001912	PML|
GO:0051095	regulation of helicase activity	biological_process	0.04995	0.81065	1	66	3	4727	ENSSSCG00000010453	IFIT1|
GO:0043226	organelle	cellular_component	0.04997	0.81065	37	66	2043	4727	ENSSSCG00000016520,ENSSSCG00000010451,ENSSSCG00000024398,ENSSSCG00000022912,ENSSSCG00000002538,ENSSSCG00000009806,ENSSSCG00000005738,ENSSSCG00000010831,ENSSSCG00000006289,ENSSSCG00000022486,ENSSSCG00000023304,ENSSSCG00000026362,ENSSSCG00000012076,ENSSSCG00000008647,ENSSSCG00000015074,ENSSSCG00000001912,ENSSSCG00000015525,ENSSSCG00000012077,ENSSSCG00000013835,ENSSSCG00000010454,ENSSSCG00000027219,…	CREB3L2|IFIT2|-|NT5C3A|DYNC1H1|SETD1B|RALGDS|DUSP10|F5|CBLB|SRRM2|HES1|MX2|CMPK2|SIDT2|PML|TOR3A|MX1|CASP14|IFIT5|AKAP7|IFIT3|AQP3|OAS1|RBM47|PDS5B|PLK2|CPNE9|HERC6|RSAD2|BCL2L14|STAT1|-|NR4A1|NFKBIZ|SETX|SAMD9|
GO:0051049	regulation of transport	biological_process	0.04997	0.81065	7	66	231	4727	ENSSSCG00000008648,ENSSSCG00000009997,ENSSSCG00000001912,ENSSSCG00000001050,ENSSSCG00000012076,ENSSSCG00000012077,ENSSSCG00000015074	RSAD2|OSM|PML|EDN1|MX2|MX1|SIDT2|
GO:0031967	organelle envelope	cellular_component	0.050016	0.81065	5	66	137	4727	ENSSSCG00000008648,ENSSSCG00000001912,ENSSSCG00000012076,ENSSSCG00000028326,ENSSSCG00000012077	RSAD2|PML|MX2|NR4A1|MX1|
GO:0031975	envelope	cellular_component	0.050016	0.81065	5	66	137	4727	ENSSSCG00000001912,ENSSSCG00000008648,ENSSSCG00000012077,ENSSSCG00000028326,ENSSSCG00000012076	PML|RSAD2|MX1|NR4A1|MX2|
GO:0009888	tissue development	biological_process	0.050026	0.81065	8	66	278	4727	ENSSSCG00000001050,ENSSSCG00000001912,ENSSSCG00000015074,ENSSSCG00000006495,ENSSSCG00000026362,ENSSSCG00000028326,ENSSSCG00000026383,ENSSSCG00000016520	EDN1|PML|SIDT2|SEMA4A|HES1|NR4A1|NRP2|CREB3L2|
GO:0030522	intracellular receptor signaling pathway	biological_process	0.050074	0.81065	2	66	24	4727	ENSSSCG00000028326,ENSSSCG00000001912	NR4A1|PML|
GO:0045089	positive regulation of innate immune response	biological_process	0.050107	0.81065	2	66	24	4727	ENSSSCG00000008648,ENSSSCG00000024996	RSAD2|-|
GO:0009133	nucleoside diphosphate biosynthetic process	biological_process	0.050128	0.81065	1	66	3	4727	ENSSSCG00000008647	CMPK2|
GO:0046456	icosanoid biosynthetic process	biological_process	0.050354	0.81065	1	66	4	4727	ENSSSCG00000001050	EDN1|
GO:1901570	fatty acid derivative biosynthetic process	biological_process	0.050354	0.81065	1	66	4	4727	ENSSSCG00000001050	EDN1|
GO:0048589	developmental growth	biological_process	0.050492	0.81065	3	66	55	4727	ENSSSCG00000026412,ENSSSCG00000026383,ENSSSCG00000006495	-|NRP2|SEMA4A|
GO:0072071	renal interstitial cell differentiation	biological_process	0.050531	0.81065	1	66	4	4727	ENSSSCG00000026362	HES1|
GO:0045824	negative regulation of innate immune response	biological_process	0.050616	0.81065	1	66	3	4727	ENSSSCG00000010831	DUSP10|
GO:0045840	positive regulation of mitosis	biological_process	0.050845	0.81065	1	66	4	4727	ENSSSCG00000001050	EDN1|
GO:0051785	positive regulation of nuclear division	biological_process	0.050845	0.81065	1	66	4	4727	ENSSSCG00000001050	EDN1|
GO:0002369	T cell cytokine production	biological_process	0.050846	0.81065	1	66	3	4727	ENSSSCG00000008648	RSAD2|
GO:0002709	regulation of T cell mediated immunity	biological_process	0.050846	0.81065	1	66	3	4727	ENSSSCG00000008648	RSAD2|
GO:0002711	positive regulation of T cell mediated immunity	biological_process	0.050846	0.81065	1	66	3	4727	ENSSSCG00000008648	RSAD2|
GO:0006977	DNA damage response, signal transduction by p53 class mediator resulting in cell cycle arrest	biological_process	0.051327	0.81395	1	66	3	4727	ENSSSCG00000001912	PML|
GO:0072413	signal transduction involved in mitotic cell cycle checkpoint	biological_process	0.051327	0.81395	1	66	3	4727	ENSSSCG00000001912	PML|
GO:0072431	signal transduction involved in mitotic G1 DNA damage checkpoint	biological_process	0.051327	0.81395	1	66	3	4727	ENSSSCG00000001912	PML|
GO:0000188	inactivation of MAPK activity	biological_process	0.051417	0.81395	1	66	4	4727	ENSSSCG00000010831	DUSP10|
GO:0042611	MHC protein complex	cellular_component	0.051423	0.81395	1	66	4	4727	ENSSSCG00000001341	SLA-11|
GO:0034105	positive regulation of tissue remodeling	biological_process	0.051589	0.81487	1	66	3	4727	ENSSSCG00000001912	PML|
GO:0032940	secretion by cell	biological_process	0.051629	0.81487	5	66	141	4727	ENSSSCG00000008648,ENSSSCG00000009997,ENSSSCG00000001912,ENSSSCG00000001050,ENSSSCG00000015074	RSAD2|OSM|PML|EDN1|SIDT2|
GO:0060056	mammary gland involution	biological_process	0.051936	0.81509	1	66	3	4727	ENSSSCG00000001912	PML|
GO:0050873	brown fat cell differentiation	biological_process	0.051951	0.81509	1	66	5	4727	ENSSSCG00000010831	DUSP10|
GO:0002790	peptide secretion	biological_process	0.05199	0.81509	2	66	27	4727	ENSSSCG00000015074,ENSSSCG00000001050	SIDT2|EDN1|
GO:0030072	peptide hormone secretion	biological_process	0.05199	0.81509	2	66	27	4727	ENSSSCG00000015074,ENSSSCG00000001050	SIDT2|EDN1|
GO:0007184	SMAD protein import into nucleus	biological_process	0.052014	0.81509	1	66	3	4727	ENSSSCG00000001912	PML|
GO:0048661	positive regulation of smooth muscle cell proliferation	biological_process	0.052089	0.81509	1	66	4	4727	ENSSSCG00000001050	EDN1|
GO:0019755	one-carbon compound transport	biological_process	0.052911	0.82555	1	66	4	4727	ENSSSCG00000010991	AQP3|
GO:0019901	protein kinase binding	molecular_function	0.053127	0.82555	3	66	57	4727	ENSSSCG00000000623,ENSSSCG00000024996,ENSSSCG00000027219	BCL2L14|-|AKAP7|
GO:0001666	response to hypoxia	biological_process	0.053266	0.82555	2	66	24	4727	ENSSSCG00000001912,ENSSSCG00000001050	PML|EDN1|
GO:0036293	response to decreased oxygen levels	biological_process	0.053266	0.82555	2	66	24	4727	ENSSSCG00000001912,ENSSSCG00000001050	PML|EDN1|
GO:0050701	interleukin-1 secretion	biological_process	0.053346	0.82555	1	66	4	4727	ENSSSCG00000001912	PML|
GO:0050702	interleukin-1 beta secretion	biological_process	0.053346	0.82555	1	66	4	4727	ENSSSCG00000001912	PML|
GO:0010638	positive regulation of organelle organization	biological_process	0.053357	0.82555	3	66	60	4727	ENSSSCG00000022916,ENSSSCG00000001912,ENSSSCG00000001050	EVL|PML|EDN1|
GO:0030902	hindbrain development	biological_process	0.053359	0.82555	2	66	24	4727	ENSSSCG00000026412,ENSSSCG00000026362	-|HES1|
GO:0016307	phosphatidylinositol phosphate kinase activity	molecular_function	0.053516	0.82666	1	66	4	4727	ENSSSCG00000026443	-|
GO:0009147	pyrimidine nucleoside triphosphate metabolic process	biological_process	0.05367	0.82666	1	66	4	4727	ENSSSCG00000008647	CMPK2|
GO:0009148	pyrimidine nucleoside triphosphate biosynthetic process	biological_process	0.05367	0.82666	1	66	4	4727	ENSSSCG00000008647	CMPK2|
GO:0043086	negative regulation of catalytic activity	biological_process	0.053767	0.82666	4	66	101	4727	ENSSSCG00000010453,ENSSSCG00000001912,ENSSSCG00000028326,ENSSSCG00000010831	IFIT1|PML|NR4A1|DUSP10|
GO:0071396	cellular response to lipid	biological_process	0.053806	0.82666	3	66	55	4727	ENSSSCG00000008647,ENSSSCG00000028326,ENSSSCG00000005724	CMPK2|NR4A1|SETX|
GO:1901991	negative regulation of mitotic cell cycle phase transition	biological_process	0.054818	0.84038	2	66	25	4727	ENSSSCG00000016925,ENSSSCG00000001912	PLK2|PML|
GO:0006468	protein phosphorylation	biological_process	0.054853	0.84038	8	66	279	4727	ENSSSCG00000015071,ENSSSCG00000024996,ENSSSCG00000016925,ENSSSCG00000010831,ENSSSCG00000009997,ENSSSCG00000001050,ENSSSCG00000001912,ENSSSCG00000026362	SIK3|-|PLK2|DUSP10|OSM|EDN1|PML|HES1|
GO:0015833	peptide transport	biological_process	0.055118	0.84327	2	66	28	4727	ENSSSCG00000015074,ENSSSCG00000001050	SIDT2|EDN1|
GO:0030030	cell projection organization	biological_process	0.055286	0.84338	6	66	179	4727	ENSSSCG00000026412,ENSSSCG00000022916,ENSSSCG00000026383,ENSSSCG00000005724,ENSSSCG00000026362,ENSSSCG00000006495	-|EVL|NRP2|SETX|HES1|SEMA4A|
GO:0032872	regulation of stress-activated MAPK cascade	biological_process	0.055432	0.84338	2	66	24	4727	ENSSSCG00000010831,ENSSSCG00000001050	DUSP10|EDN1|
GO:0046328	regulation of JNK cascade	biological_process	0.055432	0.84338	2	66	24	4727	ENSSSCG00000010831,ENSSSCG00000001050	DUSP10|EDN1|
GO:0070302	regulation of stress-activated protein kinase signaling cascade	biological_process	0.055432	0.84338	2	66	24	4727	ENSSSCG00000001050,ENSSSCG00000010831	EDN1|DUSP10|
GO:0061564	axon development	biological_process	0.055788	0.84763	3	66	58	4727	ENSSSCG00000006495,ENSSSCG00000026412,ENSSSCG00000026383	SEMA4A|-|NRP2|
GO:0003091	renal water homeostasis	biological_process	0.056215	0.85175	1	66	4	4727	ENSSSCG00000010991	AQP3|
GO:0003097	renal water transport	biological_process	0.056215	0.85175	1	66	4	4727	ENSSSCG00000010991	AQP3|
GO:0040013	negative regulation of locomotion	biological_process	0.056399	0.85311	2	66	25	4727	ENSSSCG00000022916,ENSSSCG00000006495	EVL|SEMA4A|
GO:0048666	neuron development	biological_process	0.056487	0.85311	5	66	139	4727	ENSSSCG00000026362,ENSSSCG00000006495,ENSSSCG00000026412,ENSSSCG00000026383,ENSSSCG00000005724	HES1|SEMA4A|-|NRP2|SETX|
GO:0061178	regulation of insulin secretion involved in cellular response to glucose stimulus	biological_process	0.056664	0.85311	1	66	4	4727	ENSSSCG00000015074	SIDT2|
GO:0055078	sodium ion homeostasis	biological_process	0.056792	0.85311	1	66	4	4727	ENSSSCG00000001050	EDN1|
GO:0050804	regulation of synaptic transmission	biological_process	0.056871	0.85311	2	66	27	4727	ENSSSCG00000001050,ENSSSCG00000016925	EDN1|PLK2|
GO:0048532	anatomical structure arrangement	biological_process	0.056972	0.85311	1	66	4	4727	ENSSSCG00000026383	NRP2|
GO:0046599	regulation of centriole replication	biological_process	0.057	0.85311	1	66	4	4727	ENSSSCG00000016925	PLK2|
GO:0010631	epithelial cell migration	biological_process	0.057041	0.85311	2	66	26	4727	ENSSSCG00000006495,ENSSSCG00000022916	SEMA4A|EVL|
GO:0090132	epithelium migration	biological_process	0.057041	0.85311	2	66	26	4727	ENSSSCG00000022916,ENSSSCG00000006495	EVL|SEMA4A|
GO:0090068	positive regulation of cell cycle process	biological_process	0.057161	0.85311	2	66	26	4727	ENSSSCG00000001050,ENSSSCG00000001912	EDN1|PML|
GO:2000144	positive regulation of DNA-dependent transcription, initiation	biological_process	0.057208	0.85311	1	66	4	4727	ENSSSCG00000005724	SETX|
GO:0007167	enzyme linked receptor protein signaling pathway	biological_process	0.057243	0.85311	5	66	139	4727	ENSSSCG00000024996,ENSSSCG00000026362,ENSSSCG00000026383,ENSSSCG00000001912,ENSSSCG00000005724	-|HES1|NRP2|PML|SETX|
GO:0043227	membrane-bounded organelle	cellular_component	0.05739	0.85311	34	66	1860	4727	ENSSSCG00000015074,ENSSSCG00000008647,ENSSSCG00000012076,ENSSSCG00000026362,ENSSSCG00000015525,ENSSSCG00000001912,ENSSSCG00000006289,ENSSSCG00000010831,ENSSSCG00000023304,ENSSSCG00000022486,ENSSSCG00000009806,ENSSSCG00000002538,ENSSSCG00000022912,ENSSSCG00000005738,ENSSSCG00000016520,ENSSSCG00000010451,ENSSSCG00000029531,ENSSSCG00000028326,ENSSSCG00000016057,ENSSSCG00000011951,ENSSSCG00000027372,…	SIDT2|CMPK2|MX2|HES1|TOR3A|PML|F5|DUSP10|SRRM2|CBLB|SETD1B|DYNC1H1|NT5C3A|RALGDS|CREB3L2|IFIT2|-|NR4A1|STAT1|NFKBIZ|SAMD9|SETX|PDS5B|HERC6|RSAD2|CPNE9|AKAP7|IFIT5|CASP14|RBM47|OAS1|AQP3|IFIT3|MX1|
GO:0002832	negative regulation of response to biotic stimulus	biological_process	0.057453	0.85311	1	66	4	4727	ENSSSCG00000010453	IFIT1|
GO:0048638	regulation of developmental growth	biological_process	0.057513	0.85311	2	66	25	4727	ENSSSCG00000026412,ENSSSCG00000006495	-|SEMA4A|
GO:0045683	negative regulation of epidermis development	biological_process	0.057777	0.85311	1	66	4	4727	ENSSSCG00000026362	HES1|
GO:0070482	response to oxygen levels	biological_process	0.05778	0.85311	2	66	25	4727	ENSSSCG00000001912,ENSSSCG00000001050	PML|EDN1|
GO:0009165	nucleotide biosynthetic process	biological_process	0.05778	0.85311	3	66	62	4727	ENSSSCG00000008647,ENSSSCG00000009882,ENSSSCG00000001050	CMPK2|OAS1|EDN1|
GO:1901293	nucleoside phosphate biosynthetic process	biological_process	0.05778	0.85311	3	66	62	4727	ENSSSCG00000008647,ENSSSCG00000009882,ENSSSCG00000001050	CMPK2|OAS1|EDN1|
GO:0002474	antigen processing and presentation of peptide antigen via MHC class I	biological_process	0.058282	0.85937	1	66	4	4727	ENSSSCG00000001341	SLA-11|
GO:0045063	T-helper 1 cell differentiation	biological_process	0.058744	0.86212	1	66	4	4727	ENSSSCG00000006495	SEMA4A|
GO:0009648	photoperiodism	biological_process	0.058858	0.86212	1	66	4	4727	ENSSSCG00000001912	PML|
GO:0009649	entrainment of circadian clock	biological_process	0.058858	0.86212	1	66	4	4727	ENSSSCG00000001912	PML|
GO:0043153	entrainment of circadian clock by photoperiod	biological_process	0.058858	0.86212	1	66	4	4727	ENSSSCG00000001912	PML|
GO:0002828	regulation of type 2 immune response	biological_process	0.058898	0.86212	1	66	4	4727	ENSSSCG00000008648	RSAD2|
GO:0045499	chemorepellent activity	molecular_function	0.05894	0.86212	1	66	4	4727	ENSSSCG00000006495	SEMA4A|
GO:0051019	mitogen-activated protein kinase binding	molecular_function	0.059073	0.86293	1	66	4	4727	ENSSSCG00000024996	-|
GO:0044464	cell part	cellular_component	0.059767	0.87191	49	66	3056	4727	ENSSSCG00000001341,ENSSSCG00000010453,ENSSSCG00000012077,ENSSSCG00000001050,ENSSSCG00000008796,ENSSSCG00000010452,ENSSSCG00000010991,ENSSSCG00000009882,ENSSSCG00000027219,ENSSSCG00000013835,ENSSSCG00000006495,ENSSSCG00000010454,ENSSSCG00000008648,ENSSSCG00000021712,ENSSSCG00000016925,ENSSSCG00000021725,ENSSSCG00000022916,ENSSSCG00000027372,ENSSSCG00000005724,ENSSSCG00000009997,ENSSSCG00000011951,…	SLA-11|IFIT1|MX1|EDN1|RBM47|IFIT3|AQP3|OAS1|AKAP7|CASP14|SEMA4A|IFIT5|RSAD2|HERC6|PLK2|PDS5B|EVL|SAMD9|SETX|OSM|NFKBIZ|STAT1|BCL2L14|-|NR4A1|IFIT2|NRP2|-|TNFSF13B|-|DIRAS3|CREB3L2|RALGDS|HERC5|SETD1B|NT5C3A|DYNC1H1|-|CBLB|SRRM2|DUSP10|F5|PML|C3AR1|TOR3A|SIDT2|HES1|MX2|CMPK2|
GO:0060444	branching involved in mammary gland duct morphogenesis	biological_process	0.05993	0.87312	1	66	4	4727	ENSSSCG00000001912	PML|
GO:0050731	positive regulation of peptidyl-tyrosine phosphorylation	biological_process	0.060012	0.87316	2	66	27	4727	ENSSSCG00000026362,ENSSSCG00000009997	HES1|OSM|
GO:0008283	cell proliferation	biological_process	0.060145	0.87393	7	66	241	4727	ENSSSCG00000009997,ENSSSCG00000010452,ENSSSCG00000001912,ENSSSCG00000001050,ENSSSCG00000026362,ENSSSCG00000015074,ENSSSCG00000021725	OSM|IFIT3|PML|EDN1|HES1|SIDT2|PDS5B|
GO:0032069	regulation of nuclease activity	biological_process	0.060427	0.87473	1	66	4	4727	ENSSSCG00000009882	OAS1|
GO:0030517	negative regulation of axon extension	biological_process	0.060479	0.87473	1	66	4	4727	ENSSSCG00000006495	SEMA4A|
GO:0032469	endoplasmic reticulum calcium ion homeostasis	biological_process	0.060645	0.87473	1	66	4	4727	ENSSSCG00000001912	PML|
GO:0050794	regulation of cellular process	biological_process	0.060672	0.87473	34	66	2030	4727	ENSSSCG00000005738,ENSSSCG00000003797,ENSSSCG00000024996,ENSSSCG00000016520,ENSSSCG00000026383,ENSSSCG00000010451,ENSSSCG00000015074,ENSSSCG00000012076,ENSSSCG00000026362,ENSSSCG00000001912,ENSSSCG00000023868,ENSSSCG00000010831,ENSSSCG00000027982,ENSSSCG00000026412,ENSSSCG00000022486,ENSSSCG00000010454,ENSSSCG00000013835,ENSSSCG00000006495,ENSSSCG00000001050,ENSSSCG00000015621,ENSSSCG00000009882,…	RALGDS|DIRAS3|-|CREB3L2|NRP2|IFIT2|SIDT2|MX2|HES1|PML|C3AR1|DUSP10|ISG15|-|CBLB|IFIT5|CASP14|SEMA4A|EDN1|PLXNA2|OAS1|IFIT3|MX1|IFIT1|NR4A1|BCL2L14|STAT1|EVL|SETX|OSM|NFKBIZ|PDS5B|PLK2|RSAD2|
GO:0043330	response to exogenous dsRNA	biological_process	0.06071	0.87473	1	66	4	4727	ENSSSCG00000010453	IFIT1|
GO:0035270	endocrine system development	biological_process	0.060722	0.87473	2	66	28	4727	ENSSSCG00000015074,ENSSSCG00000026362	SIDT2|HES1|
GO:0051018	protein kinase A binding	molecular_function	0.060757	0.87473	1	66	4	4727	ENSSSCG00000027219	AKAP7|
GO:0061333	renal tubule morphogenesis	biological_process	0.060846	0.87486	1	66	5	4727	ENSSSCG00000026362	HES1|
GO:0055065	metal ion homeostasis	biological_process	0.061393	0.88157	3	66	61	4727	ENSSSCG00000001050,ENSSSCG00000001912,ENSSSCG00000023868	EDN1|PML|C3AR1|
GO:2001236	regulation of extrinsic apoptotic signaling pathway	biological_process	0.061588	0.88321	2	66	26	4727	ENSSSCG00000000623,ENSSSCG00000001912	BCL2L14|PML|
GO:0051445	regulation of meiotic cell cycle	biological_process	0.062025	0.8883	1	66	5	4727	ENSSSCG00000009997	OSM|
GO:0005021	vascular endothelial growth factor-activated receptor activity	molecular_function	0.062104	0.8883	1	66	4	4727	ENSSSCG00000026383	NRP2|
GO:0038165	oncostatin-M-mediated signaling pathway	biological_process	0.062504	0.89284	1	66	4	4727	ENSSSCG00000009997	OSM|
GO:0031400	negative regulation of protein modification process	biological_process	0.062663	0.89284	3	66	63	4727	ENSSSCG00000027982,ENSSSCG00000010831,ENSSSCG00000001912	ISG15|DUSP10|PML|
GO:0014829	vascular smooth muscle contraction	biological_process	0.062785	0.89284	1	66	4	4727	ENSSSCG00000001050	EDN1|
GO:0002720	positive regulation of cytokine production involved in immune response	biological_process	0.062827	0.89284	1	66	5	4727	ENSSSCG00000008648	RSAD2|
GO:0072595	maintenance of protein localization in organelle	biological_process	0.062828	0.89284	1	66	4	4727	ENSSSCG00000001912	PML|
GO:0005125	cytokine activity	molecular_function	0.063039	0.89469	2	66	34	4727	ENSSSCG00000001050,ENSSSCG00000009997	EDN1|OSM|
GO:0003002	regionalization	biological_process	0.063284	0.89667	3	66	66	4727	ENSSSCG00000026362,ENSSSCG00000026412,ENSSSCG00000001050	HES1|-|EDN1|
GO:0043508	negative regulation of JUN kinase activity	biological_process	0.063342	0.89667	1	66	4	4727	ENSSSCG00000010831	DUSP10|
GO:0034123	positive regulation of toll-like receptor signaling pathway	biological_process	0.063507	0.89784	1	66	4	4727	ENSSSCG00000008648	RSAD2|
GO:0042800	histone methyltransferase activity (H3-K4 specific)	molecular_function	0.063666	0.89853	1	66	4	4727	ENSSSCG00000009806	SETD1B|
GO:0048521	negative regulation of behavior	biological_process	0.063801	0.89853	1	66	4	4727	ENSSSCG00000006495	SEMA4A|
GO:0050922	negative regulation of chemotaxis	biological_process	0.063801	0.89853	1	66	4	4727	ENSSSCG00000006495	SEMA4A|
GO:0090130	tissue migration	biological_process	0.064147	0.90179	2	66	28	4727	ENSSSCG00000006495,ENSSSCG00000022916	SEMA4A|EVL|
GO:0042692	muscle cell differentiation	biological_process	0.064196	0.90179	3	66	64	4727	ENSSSCG00000001050,ENSSSCG00000028326,ENSSSCG00000026362	EDN1|NR4A1|HES1|
GO:0043502	regulation of muscle adaptation	biological_process	0.064584	0.90499	1	66	5	4727	ENSSSCG00000001050	EDN1|
GO:0070301	cellular response to hydrogen peroxide	biological_process	0.064651	0.90499	1	66	5	4727	ENSSSCG00000005724	SETX|
GO:0021984	adenohypophysis development	biological_process	0.064746	0.90499	1	66	5	4727	ENSSSCG00000026362	HES1|
GO:0030217	T cell differentiation	biological_process	0.064868	0.90499	2	66	28	4727	ENSSSCG00000006495,ENSSSCG00000008648	SEMA4A|RSAD2|
GO:0072012	glomerulus vasculature development	biological_process	0.064883	0.90499	1	66	5	4727	ENSSSCG00000026362	HES1|
GO:0070566	adenylyltransferase activity	molecular_function	0.064919	0.90499	1	66	4	4727	ENSSSCG00000009882	OAS1|
GO:0002460	adaptive immune response based on somatic recombination of immune receptors built from immunoglobulin superfamily domains	biological_process	0.065708	0.91417	2	66	31	4727	ENSSSCG00000008648,ENSSSCG00000006495	RSAD2|SEMA4A|
GO:0005623	cell	cellular_component	0.065744	0.91417	49	66	3071	4727	ENSSSCG00000022912,ENSSSCG00000002538,ENSSSCG00000009806,ENSSSCG00000030548,ENSSSCG00000005738,ENSSSCG00000016520,ENSSSCG00000024996,ENSSSCG00000003797,ENSSSCG00000010451,ENSSSCG00000024398,ENSSSCG00000009542,ENSSSCG00000026383,ENSSSCG00000026362,ENSSSCG00000012076,ENSSSCG00000008647,ENSSSCG00000015074,ENSSSCG00000001912,ENSSSCG00000023868,ENSSSCG00000015525,ENSSSCG00000010831,ENSSSCG00000006289,…	NT5C3A|DYNC1H1|SETD1B|HERC5|RALGDS|CREB3L2|-|DIRAS3|IFIT2|-|TNFSF13B|NRP2|HES1|MX2|CMPK2|SIDT2|PML|C3AR1|TOR3A|DUSP10|F5|SRRM2|CBLB|-|SEMA4A|CASP14|IFIT5|AKAP7|IFIT3|OAS1|AQP3|EDN1|RBM47|MX1|SLA-11|IFIT1|BCL2L14|STAT1|-|NR4A1|SAMD9|SETX|NFKBIZ|OSM|EVL|PLK2|PDS5B|RSAD2|HERC6|
GO:0006636	unsaturated fatty acid biosynthetic process	biological_process	0.066136	0.9183	1	66	5	4727	ENSSSCG00000001050	EDN1|
GO:0046903	secretion	biological_process	0.066208	0.9183	5	66	151	4727	ENSSSCG00000015074,ENSSSCG00000009997,ENSSSCG00000008648,ENSSSCG00000001050,ENSSSCG00000001912	SIDT2|OSM|RSAD2|EDN1|PML|
GO:0042127	regulation of cell proliferation	biological_process	0.066378	0.9195	6	66	196	4727	ENSSSCG00000026362,ENSSSCG00000021725,ENSSSCG00000010452,ENSSSCG00000009997,ENSSSCG00000001050,ENSSSCG00000001912	HES1|PDS5B|IFIT3|OSM|EDN1|PML|
GO:0002320	lymphoid progenitor cell differentiation	biological_process	0.066615	0.92162	1	66	5	4727	ENSSSCG00000026362	HES1|
GO:0032211	negative regulation of telomere maintenance via telomerase	biological_process	0.066856	0.92343	1	66	5	4727	ENSSSCG00000001912	PML|
GO:0048754	branching morphogenesis of an epithelial tube	biological_process	0.066914	0.92343	2	66	28	4727	ENSSSCG00000001050,ENSSSCG00000001912	EDN1|PML|
GO:0042474	middle ear morphogenesis	biological_process	0.067121	0.92446	1	66	5	4727	ENSSSCG00000001050	EDN1|
GO:0031399	regulation of protein modification process	biological_process	0.067272	0.92446	6	66	194	4727	ENSSSCG00000026362,ENSSSCG00000027982,ENSSSCG00000010831,ENSSSCG00000009997,ENSSSCG00000001912,ENSSSCG00000001050	HES1|ISG15|DUSP10|OSM|PML|EDN1|
GO:1900027	regulation of ruffle assembly	biological_process	0.067318	0.92446	1	66	5	4727	ENSSSCG00000022916	EVL|
GO:0050777	negative regulation of immune response	biological_process	0.06738	0.92446	1	66	4	4727	ENSSSCG00000010831	DUSP10|
GO:0051972	regulation of telomerase activity	biological_process	0.067422	0.92446	1	66	5	4727	ENSSSCG00000001912	PML|
GO:0002821	positive regulation of adaptive immune response	biological_process	0.067605	0.92446	1	66	4	4727	ENSSSCG00000008648	RSAD2|
GO:0002824	positive regulation of adaptive immune response based on somatic recombination of immune receptors built from immunoglobulin superfamily domains	biological_process	0.067605	0.92446	1	66	4	4727	ENSSSCG00000008648	RSAD2|
GO:0065009	regulation of molecular function	biological_process	0.067776	0.92446	10	66	400	4727	ENSSSCG00000010453,ENSSSCG00000010451,ENSSSCG00000010831,ENSSSCG00000009882,ENSSSCG00000005738,ENSSSCG00000001912,ENSSSCG00000001050,ENSSSCG00000013835,ENSSSCG00000026362,ENSSSCG00000028326	IFIT1|IFIT2|DUSP10|OAS1|RALGDS|PML|EDN1|CASP14|HES1|NR4A1|
GO:0060412	ventricular septum morphogenesis	biological_process	0.067813	0.92446	1	66	5	4727	ENSSSCG00000026362	HES1|
GO:0070059	intrinsic apoptotic signaling pathway in response to endoplasmic reticulum stress	biological_process	0.067938	0.92446	1	66	4	4727	ENSSSCG00000001912	PML|
GO:0072401	signal transduction involved in DNA integrity checkpoint	biological_process	0.068077	0.92446	1	66	4	4727	ENSSSCG00000001912	PML|
GO:0072422	signal transduction involved in DNA damage checkpoint	biological_process	0.068077	0.92446	1	66	4	4727	ENSSSCG00000001912	PML|
GO:0051336	regulation of hydrolase activity	biological_process	0.068131	0.92446	6	66	194	4727	ENSSSCG00000010453,ENSSSCG00000009882,ENSSSCG00000005738,ENSSSCG00000001912,ENSSSCG00000028326,ENSSSCG00000013835	IFIT1|OAS1|RALGDS|PML|NR4A1|CASP14|
GO:0030099	myeloid cell differentiation	biological_process	0.068262	0.92446	2	66	31	4727	ENSSSCG00000027982,ENSSSCG00000001912	ISG15|PML|
GO:2000058	regulation of protein ubiquitination involved in ubiquitin-dependent protein catabolic process	biological_process	0.068417	0.92446	1	66	4	4727	ENSSSCG00000001912	PML|
GO:0003300	cardiac muscle hypertrophy	biological_process	0.068567	0.92446	1	66	5	4727	ENSSSCG00000001050	EDN1|
GO:0000166	nucleotide binding	molecular_function	0.068609	0.92446	13	66	549	4727	ENSSSCG00000012077,ENSSSCG00000015071,ENSSSCG00000003797,ENSSSCG00000024996,ENSSSCG00000016925,ENSSSCG00000009882,ENSSSCG00000017146,ENSSSCG00000008796,ENSSSCG00000015525,ENSSSCG00000026336,ENSSSCG00000012076,ENSSSCG00000022912,ENSSSCG00000009806	MX1|SIK3|DIRAS3|-|PLK2|OAS1|RNF213|RBM47|TOR3A|-|MX2|NT5C3A|SETD1B|
GO:1901265	nucleoside phosphate binding	molecular_function	0.068609	0.92446	13	66	549	4727	ENSSSCG00000003797,ENSSSCG00000016925,ENSSSCG00000024996,ENSSSCG00000012077,ENSSSCG00000015071,ENSSSCG00000015525,ENSSSCG00000026336,ENSSSCG00000008796,ENSSSCG00000009882,ENSSSCG00000017146,ENSSSCG00000009806,ENSSSCG00000012076,ENSSSCG00000022912	DIRAS3|PLK2|-|MX1|SIK3|TOR3A|-|RBM47|OAS1|RNF213|SETD1B|MX2|NT5C3A|
GO:0031091	platelet alpha granule	cellular_component	0.068693	0.92446	1	66	4	4727	ENSSSCG00000006289	F5|
GO:0017148	negative regulation of translation	biological_process	0.068754	0.92446	1	66	4	4727	ENSSSCG00000001912	PML|
GO:0021884	forebrain neuron development	biological_process	0.068756	0.92446	1	66	4	4727	ENSSSCG00000026383	NRP2|
GO:0001077	RNA polymerase II core promoter proximal region sequence-specific DNA binding transcription factor activity involved in positive regulation of transcription	molecular_function	0.068844	0.92451	2	66	32	4727	ENSSSCG00000016520,ENSSSCG00000028326	CREB3L2|NR4A1|
GO:0010001	glial cell differentiation	biological_process	0.068982	0.92453	2	66	30	4727	ENSSSCG00000026362,ENSSSCG00000010831	HES1|DUSP10|
GO:0031349	positive regulation of defense response	biological_process	0.069064	0.92453	2	66	30	4727	ENSSSCG00000008648,ENSSSCG00000024996	RSAD2|-|
GO:0061448	connective tissue development	biological_process	0.069098	0.92453	2	66	31	4727	ENSSSCG00000016520,ENSSSCG00000001050	CREB3L2|EDN1|
GO:0051495	positive regulation of cytoskeleton organization	biological_process	0.069232	0.9252	2	66	30	4727	ENSSSCG00000022916,ENSSSCG00000001050	EVL|EDN1|
GO:0004879	ligand-activated sequence-specific DNA binding RNA polymerase II transcription factor activity	molecular_function	0.069371	0.92593	1	66	5	4727	ENSSSCG00000028326	NR4A1|
GO:0030003	cellular cation homeostasis	biological_process	0.069925	0.93065	3	66	64	4727	ENSSSCG00000023868,ENSSSCG00000001912,ENSSSCG00000001050	C3AR1|PML|EDN1|
GO:0019076	viral release from host cell	biological_process	0.069979	0.93065	1	66	5	4727	ENSSSCG00000001912	PML|
GO:1902186	regulation of viral release from host cell	biological_process	0.069979	0.93065	1	66	5	4727	ENSSSCG00000001912	PML|
GO:0044699	single-organism process	biological_process	0.070359	0.93423	43	66	2649	4727	ENSSSCG00000026552,ENSSSCG00000005738,ENSSSCG00000009806,ENSSSCG00000002538,ENSSSCG00000026383,ENSSSCG00000010451,ENSSSCG00000003797,ENSSSCG00000024996,ENSSSCG00000016520,ENSSSCG00000001912,ENSSSCG00000023868,ENSSSCG00000015074,ENSSSCG00000012076,ENSSSCG00000008647,ENSSSCG00000026362,ENSSSCG00000026412,ENSSSCG00000022486,ENSSSCG00000006289,ENSSSCG00000010831,ENSSSCG00000027982,ENSSSCG00000008796,…	HIATL1|RALGDS|SETD1B|DYNC1H1|NRP2|IFIT2|DIRAS3|-|CREB3L2|PML|C3AR1|SIDT2|MX2|CMPK2|HES1|-|CBLB|F5|DUSP10|ISG15|RBM47|EDN1|PLXNA2|OAS1|AQP3|IFIT3|IFIT5|CASP14|-|SEMA4A|IFIT1|MX1|EVL|OSM|SETX|NR4A1|STAT1|BCL2L14|AP1S3|RSAD2|HERC6|PDS5B|PLK2|
GO:0051960	regulation of nervous system development	biological_process	0.070418	0.93423	4	66	106	4727	ENSSSCG00000026412,ENSSSCG00000005724,ENSSSCG00000006495,ENSSSCG00000026362	-|SETX|SEMA4A|HES1|
GO:0033962	cytoplasmic mRNA processing body assembly	biological_process	0.070625	0.93585	1	66	5	4727	ENSSSCG00000002538	DYNC1H1|
GO:0021537	telencephalon development	biological_process	0.071093	0.94091	2	66	29	4727	ENSSSCG00000026362,ENSSSCG00000026383	HES1|NRP2|
GO:0031396	regulation of protein ubiquitination	biological_process	0.071192	0.94109	2	66	29	4727	ENSSSCG00000001912,ENSSSCG00000027982	PML|ISG15|
GO:0060914	heart formation	biological_process	0.071301	0.9414	1	66	6	4727	ENSSSCG00000026362	HES1|
GO:0019900	kinase binding	molecular_function	0.071463	0.9424	3	66	65	4727	ENSSSCG00000000623,ENSSSCG00000027219,ENSSSCG00000024996	BCL2L14|AKAP7|-|
GO:0044267	cellular protein metabolic process	biological_process	0.071924	0.94674	16	66	750	4727	ENSSSCG00000024996,ENSSSCG00000024398,ENSSSCG00000009806,ENSSSCG00000030548,ENSSSCG00000001050,ENSSSCG00000015071,ENSSSCG00000027982,ENSSSCG00000016925,ENSSSCG00000017148,ENSSSCG00000010831,ENSSSCG00000022486,ENSSSCG00000021712,ENSSSCG00000026362,ENSSSCG00000017146,ENSSSCG00000009997,ENSSSCG00000001912	-|-|SETD1B|HERC5|EDN1|SIK3|ISG15|PLK2|-|DUSP10|CBLB|HERC6|HES1|RNF213|OSM|PML|
GO:0019637	organophosphate metabolic process	biological_process	0.07202	0.94674	7	66	245	4727	ENSSSCG00000009882,ENSSSCG00000005738,ENSSSCG00000001050,ENSSSCG00000029531,ENSSSCG00000008647,ENSSSCG00000022912,ENSSSCG00000026443	OAS1|RALGDS|EDN1|-|CMPK2|NT5C3A|-|
GO:0000082	G1/S transition of mitotic cell cycle	biological_process	0.072137	0.94674	2	66	29	4727	ENSSSCG00000016925,ENSSSCG00000001912	PLK2|PML|
GO:0051329	interphase of mitotic cell cycle	biological_process	0.072137	0.94674	2	66	29	4727	ENSSSCG00000001912,ENSSSCG00000016925	PML|PLK2|
GO:0009117	nucleotide metabolic process	biological_process	0.072473	0.95002	6	66	194	4727	ENSSSCG00000001050,ENSSSCG00000005738,ENSSSCG00000009882,ENSSSCG00000022912,ENSSSCG00000008647,ENSSSCG00000029531	EDN1|RALGDS|OAS1|NT5C3A|CMPK2|-|
GO:0006873	cellular ion homeostasis	biological_process	0.072806	0.95243	3	66	65	4727	ENSSSCG00000001912,ENSSSCG00000001050,ENSSSCG00000023868	PML|EDN1|C3AR1|
GO:0060174	limb bud formation	biological_process	0.072831	0.95243	1	66	5	4727	ENSSSCG00000026412	-|
GO:0022884	macromolecule transmembrane transporter activity	molecular_function	0.073154	0.95553	1	66	5	4727	ENSSSCG00000015074	SIDT2|
GO:0051969	regulation of transmission of nerve impulse	biological_process	0.073419	0.95784	2	66	31	4727	ENSSSCG00000001050,ENSSSCG00000016925	EDN1|PLK2|
GO:0015030	Cajal body	cellular_component	0.073716	0.95951	1	66	5	4727	ENSSSCG00000023304	SRRM2|
GO:0023051	regulation of signaling	biological_process	0.073759	0.95951	10	66	402	4727	ENSSSCG00000001050,ENSSSCG00000001912,ENSSSCG00000009997,ENSSSCG00000015074,ENSSSCG00000000623,ENSSSCG00000026362,ENSSSCG00000022486,ENSSSCG00000008648,ENSSSCG00000010831,ENSSSCG00000016925	EDN1|PML|OSM|SIDT2|BCL2L14|HES1|CBLB|RSAD2|DUSP10|PLK2|
GO:0006753	nucleoside phosphate metabolic process	biological_process	0.073861	0.95951	6	66	195	4727	ENSSSCG00000022912,ENSSSCG00000029531,ENSSSCG00000008647,ENSSSCG00000009882,ENSSSCG00000005738,ENSSSCG00000001050	NT5C3A|-|CMPK2|OAS1|RALGDS|EDN1|
GO:0006929	substrate-dependent cell migration	biological_process	0.073896	0.95951	1	66	5	4727	ENSSSCG00000026383	NRP2|
GO:2000826	regulation of heart morphogenesis	biological_process	0.074182	0.96074	1	66	6	4727	ENSSSCG00000026362	HES1|
GO:0002683	negative regulation of immune system process	biological_process	0.074233	0.96074	2	66	29	4727	ENSSSCG00000010453,ENSSSCG00000010831	IFIT1|DUSP10|
GO:0045687	positive regulation of glial cell differentiation	biological_process	0.074256	0.96074	1	66	6	4727	ENSSSCG00000026362	HES1|
GO:0030857	negative regulation of epithelial cell differentiation	biological_process	0.07434	0.96074	1	66	5	4727	ENSSSCG00000026362	HES1|
GO:0031334	positive regulation of protein complex assembly	biological_process	0.07451	0.96181	2	66	31	4727	ENSSSCG00000005724,ENSSSCG00000022916	SETX|EVL|
GO:0045604	regulation of epidermal cell differentiation	biological_process	0.07463	0.96221	1	66	5	4727	ENSSSCG00000026362	HES1|
GO:0007588	excretion	biological_process	0.07485	0.96393	1	66	5	4727	ENSSSCG00000001050	EDN1|
GO:0006913	nucleocytoplasmic transport	biological_process	0.075735	0.97304	3	66	67	4727	ENSSSCG00000001912,ENSSSCG00000026362,ENSSSCG00000012076	PML|HES1|MX2|
GO:0051169	nuclear transport	biological_process	0.075735	0.97304	3	66	67	4727	ENSSSCG00000001912,ENSSSCG00000012076,ENSSSCG00000026362	PML|MX2|HES1|
GO:0072395	signal transduction involved in cell cycle checkpoint	biological_process	0.075829	0.97311	1	66	5	4727	ENSSSCG00000001912	PML|
GO:0000904	cell morphogenesis involved in differentiation	biological_process	0.076305	0.97808	4	66	108	4727	ENSSSCG00000026412,ENSSSCG00000026383,ENSSSCG00000026362,ENSSSCG00000006495	-|NRP2|HES1|SEMA4A|
GO:0071158	positive regulation of cell cycle arrest	biological_process	0.076459	0.9789	1	66	5	4727	ENSSSCG00000001912	PML|
GO:0000075	cell cycle checkpoint	biological_process	0.076626	0.97991	2	66	30	4727	ENSSSCG00000016925,ENSSSCG00000001912	PLK2|PML|
GO:0045944	positive regulation of transcription from RNA polymerase II promoter	biological_process	0.076818	0.98106	5	66	159	4727	ENSSSCG00000028326,ENSSSCG00000016520,ENSSSCG00000026362,ENSSSCG00000009997,ENSSSCG00000005724	NR4A1|CREB3L2|HES1|OSM|SETX|
GO:0042578	phosphoric ester hydrolase activity	molecular_function	0.076895	0.98106	3	66	65	4727	ENSSSCG00000022912,ENSSSCG00000029531,ENSSSCG00000010831	NT5C3A|-|DUSP10|
GO:0032205	negative regulation of telomere maintenance	biological_process	0.077281	0.98484	1	66	6	4727	ENSSSCG00000001912	PML|
GO:2000737	negative regulation of stem cell differentiation	biological_process	0.077976	0.99255	1	66	6	4727	ENSSSCG00000026362	HES1|
GO:0031644	regulation of neurological system process	biological_process	0.078202	0.99326	2	66	32	4727	ENSSSCG00000016925,ENSSSCG00000001050	PLK2|EDN1|
GO:0008284	positive regulation of cell proliferation	biological_process	0.078213	0.99326	4	66	111	4727	ENSSSCG00000001050,ENSSSCG00000001912,ENSSSCG00000009997,ENSSSCG00000026362	EDN1|PML|OSM|HES1|
GO:0051539	4 iron, 4 sulfur cluster binding	molecular_function	0.078559	0.99639	1	66	5	4727	ENSSSCG00000008648	RSAD2|
GO:0045214	sarcomere organization	biological_process	0.078896	0.99639	1	66	5	4727	ENSSSCG00000001050	EDN1|
GO:2000021	regulation of ion homeostasis	biological_process	0.078905	0.99639	2	66	31	4727	ENSSSCG00000001912,ENSSSCG00000001050	PML|EDN1|
GO:0002702	positive regulation of production of molecular mediator of immune response	biological_process	0.078922	0.99639	1	66	6	4727	ENSSSCG00000008648	RSAD2|
GO:0004550	nucleoside diphosphate kinase activity	molecular_function	0.079058	0.99639	1	66	6	4727	ENSSSCG00000008647	CMPK2|
GO:0006165	nucleoside diphosphate phosphorylation	biological_process	0.079058	0.99639	1	66	6	4727	ENSSSCG00000008647	CMPK2|
GO:0009605	response to external stimulus	biological_process	0.079094	0.99639	6	66	203	4727	ENSSSCG00000023868,ENSSSCG00000001912,ENSSSCG00000026412,ENSSSCG00000026383,ENSSSCG00000006495,ENSSSCG00000010831	C3AR1|PML|-|NRP2|SEMA4A|DUSP10|
GO:0001932	regulation of protein phosphorylation	biological_process	0.079309	0.99795	5	66	155	4727	ENSSSCG00000009997,ENSSSCG00000001912,ENSSSCG00000001050,ENSSSCG00000026362,ENSSSCG00000010831	OSM|PML|EDN1|HES1|DUSP10|
GO:0055001	muscle cell development	biological_process	0.079624	0.99873	2	66	33	4727	ENSSSCG00000026362,ENSSSCG00000001050	HES1|EDN1|
GO:0006606	protein import into nucleus	biological_process	0.07973	0.99873	2	66	33	4727	ENSSSCG00000026362,ENSSSCG00000001912	HES1|PML|
GO:0044744	protein targeting to nucleus	biological_process	0.07973	0.99873	2	66	33	4727	ENSSSCG00000001912,ENSSSCG00000026362	PML|HES1|
GO:0016301	kinase activity	molecular_function	0.079735	0.99873	6	66	198	4727	ENSSSCG00000015071,ENSSSCG00000008647,ENSSSCG00000024996,ENSSSCG00000016925,ENSSSCG00000026443,ENSSSCG00000026383	SIK3|CMPK2|-|PLK2|-|NRP2|
GO:0010575	positive regulation vascular endothelial growth factor production	biological_process	0.080044	1	1	66	6	4727	ENSSSCG00000023868	C3AR1|
GO:0060563	neuroepithelial cell differentiation	biological_process	0.080495	1	1	66	6	4727	ENSSSCG00000026362	HES1|
GO:0045502	dynein binding	molecular_function	0.080672	1	1	66	5	4727	ENSSSCG00000002538	DYNC1H1|
GO:0005788	endoplasmic reticulum lumen	cellular_component	0.081217	1	1	66	6	4727	ENSSSCG00000015525	TOR3A|
GO:0042063	gliogenesis	biological_process	0.081275	1	2	66	33	4727	ENSSSCG00000010831,ENSSSCG00000026362	DUSP10|HES1|
GO:0061437	renal system vasculature development	biological_process	0.081398	1	1	66	6	4727	ENSSSCG00000026362	HES1|
GO:0061440	kidney vasculature development	biological_process	0.081398	1	1	66	6	4727	ENSSSCG00000026362	HES1|
GO:0007254	JNK cascade	biological_process	0.082046	1	2	66	30	4727	ENSSSCG00000001050,ENSSSCG00000010831	EDN1|DUSP10|
GO:0021915	neural tube development	biological_process	0.082174	1	2	66	32	4727	ENSSSCG00000026412,ENSSSCG00000026362	-|HES1|
GO:0051179	localization	biological_process	0.082233	1	20	66	994	4727	ENSSSCG00000015074,ENSSSCG00000026362,ENSSSCG00000012076,ENSSSCG00000023868,ENSSSCG00000022916,ENSSSCG00000001912,ENSSSCG00000009997,ENSSSCG00000025932,ENSSSCG00000026412,ENSSSCG00000008648,ENSSSCG00000006495,ENSSSCG00000002538,ENSSSCG00000001050,ENSSSCG00000026552,ENSSSCG00000010991,ENSSSCG00000003797,ENSSSCG00000016520,ENSSSCG00000012077,ENSSSCG00000026383,ENSSSCG00000010453	SIDT2|HES1|MX2|C3AR1|EVL|PML|OSM|AP1S3|-|RSAD2|SEMA4A|DYNC1H1|EDN1|HIATL1|AQP3|DIRAS3|CREB3L2|MX1|NRP2|IFIT1|
GO:0051325	interphase	biological_process	0.082392	1	2	66	31	4727	ENSSSCG00000001912,ENSSSCG00000016925	PML|PLK2|
GO:0034103	regulation of tissue remodeling	biological_process	0.08264	1	1	66	5	4727	ENSSSCG00000001912	PML|
GO:0014896	muscle hypertrophy	biological_process	0.082779	1	1	66	6	4727	ENSSSCG00000001050	EDN1|
GO:0014897	striated muscle hypertrophy	biological_process	0.082779	1	1	66	6	4727	ENSSSCG00000001050	EDN1|
GO:0051170	nuclear import	biological_process	0.082936	1	2	66	34	4727	ENSSSCG00000001912,ENSSSCG00000026362	PML|HES1|
GO:1901701	cellular response to oxygen-containing compound	biological_process	0.083184	1	4	66	109	4727	ENSSSCG00000005724,ENSSSCG00000008647,ENSSSCG00000028326,ENSSSCG00000015074	SETX|CMPK2|NR4A1|SIDT2|
GO:0007267	cell-cell signaling	biological_process	0.083596	1	5	66	159	4727	ENSSSCG00000016925,ENSSSCG00000015074,ENSSSCG00000026362,ENSSSCG00000001050,ENSSSCG00000009997	PLK2|SIDT2|HES1|EDN1|OSM|
GO:0031529	ruffle organization	biological_process	0.083791	1	1	66	6	4727	ENSSSCG00000022916	EVL|
GO:0097178	ruffle assembly	biological_process	0.083791	1	1	66	6	4727	ENSSSCG00000022916	EVL|
GO:0032873	negative regulation of stress-activated MAPK cascade	biological_process	0.083924	1	1	66	5	4727	ENSSSCG00000010831	DUSP10|
GO:0046329	negative regulation of JNK cascade	biological_process	0.083924	1	1	66	5	4727	ENSSSCG00000010831	DUSP10|
GO:0070303	negative regulation of stress-activated protein kinase signaling cascade	biological_process	0.083924	1	1	66	5	4727	ENSSSCG00000010831	DUSP10|
GO:0048511	rhythmic process	biological_process	0.08411	1	2	66	32	4727	ENSSSCG00000001912,ENSSSCG00000005724	PML|SETX|
GO:0032651	regulation of interleukin-1 beta production	biological_process	0.084123	1	1	66	7	4727	ENSSSCG00000001912	PML|
GO:0048002	antigen processing and presentation of peptide antigen	biological_process	0.084631	1	1	66	6	4727	ENSSSCG00000001341	SLA-11|
GO:0060716	labyrinthine layer blood vessel development	biological_process	0.084805	1	1	66	6	4727	ENSSSCG00000026362	HES1|
GO:0035019	somatic stem cell maintenance	biological_process	0.085028	1	1	66	7	4727	ENSSSCG00000026362	HES1|
GO:0072088	nephron epithelium morphogenesis	biological_process	0.085305	1	1	66	7	4727	ENSSSCG00000026362	HES1|
GO:0009617	response to bacterium	biological_process	0.08536	1	3	66	75	4727	ENSSSCG00000027982,ENSSSCG00000008647,ENSSSCG00000010831	ISG15|CMPK2|DUSP10|
GO:0045930	negative regulation of mitotic cell cycle	biological_process	0.08564	1	1	66	6	4727	ENSSSCG00000001912	PML|
GO:0045165	cell fate commitment	biological_process	0.086217	1	2	66	37	4727	ENSSSCG00000026362,ENSSSCG00000001912	HES1|PML|
GO:0046649	lymphocyte activation	biological_process	0.086297	1	3	66	71	4727	ENSSSCG00000008648,ENSSSCG00000006495,ENSSSCG00000026362	RSAD2|SEMA4A|HES1|
GO:0022403	cell cycle phase	biological_process	0.086828	1	2	66	32	4727	ENSSSCG00000016925,ENSSSCG00000001912	PLK2|PML|
GO:0040008	regulation of growth	biological_process	0.087018	1	3	66	70	4727	ENSSSCG00000026412,ENSSSCG00000001912,ENSSSCG00000006495	-|PML|SEMA4A|
GO:0051403	stress-activated MAPK cascade	biological_process	0.087333	1	2	66	31	4727	ENSSSCG00000001050,ENSSSCG00000010831	EDN1|DUSP10|
GO:0014015	positive regulation of gliogenesis	biological_process	0.087392	1	1	66	7	4727	ENSSSCG00000026362	HES1|
GO:0051642	centrosome localization	biological_process	0.087694	1	1	66	6	4727	ENSSSCG00000026412	-|
GO:2000242	negative regulation of reproductive process	biological_process	0.087748	1	1	66	7	4727	ENSSSCG00000009997	OSM|
GO:0005372	water transmembrane transporter activity	molecular_function	0.088595	1	1	66	7	4727	ENSSSCG00000010991	AQP3|
GO:0006833	water transport	biological_process	0.088595	1	1	66	7	4727	ENSSSCG00000010991	AQP3|
GO:0009992	cellular water homeostasis	biological_process	0.088595	1	1	66	7	4727	ENSSSCG00000010991	AQP3|
GO:0015166	polyol transmembrane transporter activity	molecular_function	0.088595	1	1	66	7	4727	ENSSSCG00000010991	AQP3|
GO:0015168	glycerol transmembrane transporter activity	molecular_function	0.088595	1	1	66	7	4727	ENSSSCG00000010991	AQP3|
GO:0015250	water channel activity	molecular_function	0.088595	1	1	66	7	4727	ENSSSCG00000010991	AQP3|
GO:0015254	glycerol channel activity	molecular_function	0.088595	1	1	66	7	4727	ENSSSCG00000010991	AQP3|
GO:0015791	polyol transport	biological_process	0.088595	1	1	66	7	4727	ENSSSCG00000010991	AQP3|
GO:0015793	glycerol transport	biological_process	0.088595	1	1	66	7	4727	ENSSSCG00000010991	AQP3|
GO:0045685	regulation of glial cell differentiation	biological_process	0.088719	1	1	66	7	4727	ENSSSCG00000026362	HES1|
GO:0003823	antigen binding	molecular_function	0.088859	1	1	66	8	4727	ENSSSCG00000001341	SLA-11|
GO:0035773	insulin secretion involved in cellular response to glucose stimulus	biological_process	0.089376	1	1	66	6	4727	ENSSSCG00000015074	SIDT2|
GO:0045786	negative regulation of cell cycle	biological_process	0.090073	1	2	66	34	4727	ENSSSCG00000028326,ENSSSCG00000001912	NR4A1|PML|
GO:0042508	tyrosine phosphorylation of Stat1 protein	biological_process	0.090267	1	1	66	7	4727	ENSSSCG00000009997	OSM|
GO:0042093	T-helper cell differentiation	biological_process	0.090456	1	1	66	6	4727	ENSSSCG00000006495	SEMA4A|
GO:0071822	protein complex subunit organization	biological_process	0.09114	1	7	66	261	4727	ENSSSCG00000005724,ENSSSCG00000009882,ENSSSCG00000022916,ENSSSCG00000001912,ENSSSCG00000027580,ENSSSCG00000026362,ENSSSCG00000016925	SETX|OAS1|EVL|PML|-|HES1|PLK2|
GO:0016604	nuclear body	cellular_component	0.091192	1	2	66	35	4727	ENSSSCG00000023304,ENSSSCG00000001912	SRRM2|PML|
GO:0042092	type 2 immune response	biological_process	0.091444	1	1	66	6	4727	ENSSSCG00000008648	RSAD2|
GO:0048640	negative regulation of developmental growth	biological_process	0.091652	1	1	66	6	4727	ENSSSCG00000006495	SEMA4A|
GO:0050771	negative regulation of axonogenesis	biological_process	0.091652	1	1	66	6	4727	ENSSSCG00000006495	SEMA4A|
GO:0060122	inner ear receptor stereocilium organization	biological_process	0.091775	1	1	66	6	4727	ENSSSCG00000026362	HES1|
GO:0007389	pattern specification process	biological_process	0.091801	1	3	66	77	4727	ENSSSCG00000026362,ENSSSCG00000001050,ENSSSCG00000026412	HES1|EDN1|-|
GO:0010573	vascular endothelial growth factor production	biological_process	0.091982	1	1	66	7	4727	ENSSSCG00000023868	C3AR1|
GO:0010574	regulation of vascular endothelial growth factor production	biological_process	0.091982	1	1	66	7	4727	ENSSSCG00000023868	C3AR1|
GO:0010633	negative regulation of epithelial cell migration	biological_process	0.091993	1	1	66	7	4727	ENSSSCG00000022916	EVL|
GO:0032813	tumor necrosis factor receptor superfamily binding	molecular_function	0.092358	1	1	66	8	4727	ENSSSCG00000009542	TNFSF13B|
GO:0030513	positive regulation of BMP signaling pathway	biological_process	0.092375	1	1	66	7	4727	ENSSSCG00000026362	HES1|
GO:0072273	metanephric nephron morphogenesis	biological_process	0.092715	1	1	66	7	4727	ENSSSCG00000026362	HES1|
GO:0050730	regulation of peptidyl-tyrosine phosphorylation	biological_process	0.092734	1	2	66	34	4727	ENSSSCG00000026362,ENSSSCG00000009997	HES1|OSM|
GO:0060603	mammary gland duct morphogenesis	biological_process	0.092845	1	1	66	6	4727	ENSSSCG00000001912	PML|
GO:0000975	regulatory region DNA binding	molecular_function	0.092929	1	4	66	123	4727	ENSSSCG00000026362,ENSSSCG00000016520,ENSSSCG00000025716,ENSSSCG00000005724	HES1|CREB3L2|-|SETX|
GO:0001067	regulatory region nucleic acid binding	molecular_function	0.092929	1	4	66	123	4727	ENSSSCG00000026362,ENSSSCG00000016520,ENSSSCG00000025716,ENSSSCG00000005724	HES1|CREB3L2|-|SETX|
GO:0007062	sister chromatid cohesion	biological_process	0.092951	1	1	66	7	4727	ENSSSCG00000021725	PDS5B|
GO:0007417	central nervous system development	biological_process	0.092981	1	4	66	116	4727	ENSSSCG00000026383,ENSSSCG00000026412,ENSSSCG00000010831,ENSSSCG00000026362	NRP2|-|DUSP10|HES1|
GO:0019048	modulation by virus of host morphology or physiology	biological_process	0.09299	1	1	66	7	4727	ENSSSCG00000010453	IFIT1|
GO:0032845	negative regulation of homeostatic process	biological_process	0.093235	1	1	66	7	4727	ENSSSCG00000001912	PML|
GO:0044428	nuclear part	cellular_component	0.093265	1	13	66	596	4727	ENSSSCG00000012076,ENSSSCG00000028326,ENSSSCG00000008647,ENSSSCG00000026362,ENSSSCG00000009806,ENSSSCG00000005724,ENSSSCG00000001912,ENSSSCG00000012077,ENSSSCG00000016520,ENSSSCG00000010831,ENSSSCG00000021725,ENSSSCG00000023304,ENSSSCG00000022486	MX2|NR4A1|CMPK2|HES1|SETD1B|SETX|PML|MX1|CREB3L2|DUSP10|PDS5B|SRRM2|CBLB|
GO:0042542	response to hydrogen peroxide	biological_process	0.093271	1	1	66	7	4727	ENSSSCG00000005724	SETX|
GO:0045639	positive regulation of myeloid cell differentiation	biological_process	0.093295	1	1	66	8	4727	ENSSSCG00000027982	ISG15|
GO:0034121	regulation of toll-like receptor signaling pathway	biological_process	0.093296	1	1	66	6	4727	ENSSSCG00000008648	RSAD2|
GO:0048010	vascular endothelial growth factor receptor signaling pathway	biological_process	0.093339	1	1	66	6	4727	ENSSSCG00000024996	-|
GO:0007004	telomere maintenance via telomerase	biological_process	0.093799	1	1	66	7	4727	ENSSSCG00000001912	PML|
GO:0010833	telomere maintenance via telomere lengthening	biological_process	0.093799	1	1	66	7	4727	ENSSSCG00000001912	PML|
GO:0032210	regulation of telomere maintenance via telomerase	biological_process	0.093799	1	1	66	7	4727	ENSSSCG00000001912	PML|
GO:0070013	intracellular organelle lumen	cellular_component	0.093832	1	12	66	541	4727	ENSSSCG00000010831,ENSSSCG00000021725,ENSSSCG00000016520,ENSSSCG00000022486,ENSSSCG00000023304,ENSSSCG00000009806,ENSSSCG00000008647,ENSSSCG00000028326,ENSSSCG00000026362,ENSSSCG00000015525,ENSSSCG00000001912,ENSSSCG00000005724	DUSP10|PDS5B|CREB3L2|CBLB|SRRM2|SETD1B|CMPK2|NR4A1|HES1|TOR3A|PML|SETX|
GO:0036094	small molecule binding	molecular_function	0.09408	1	13	66	578	4727	ENSSSCG00000017146,ENSSSCG00000009882,ENSSSCG00000015525,ENSSSCG00000008796,ENSSSCG00000026336,ENSSSCG00000022912,ENSSSCG00000012076,ENSSSCG00000009806,ENSSSCG00000015071,ENSSSCG00000012077,ENSSSCG00000024996,ENSSSCG00000016925,ENSSSCG00000003797	RNF213|OAS1|TOR3A|RBM47|-|NT5C3A|MX2|SETD1B|SIK3|MX1|-|PLK2|DIRAS3|
GO:0055086	nucleobase-containing small molecule metabolic process	biological_process	0.094156	1	6	66	207	4727	ENSSSCG00000009882,ENSSSCG00000001050,ENSSSCG00000005738,ENSSSCG00000022912,ENSSSCG00000008647,ENSSSCG00000029531	OAS1|EDN1|RALGDS|NT5C3A|CMPK2|-|
GO:0046834	lipid phosphorylation	biological_process	0.094282	1	1	66	7	4727	ENSSSCG00000026443	-|
GO:0046854	phosphatidylinositol phosphorylation	biological_process	0.094282	1	1	66	7	4727	ENSSSCG00000026443	-|
GO:0072234	metanephric nephron tubule development	biological_process	0.094471	1	1	66	7	4727	ENSSSCG00000026362	HES1|
GO:0072243	metanephric nephron epithelium development	biological_process	0.094471	1	1	66	7	4727	ENSSSCG00000026362	HES1|
GO:0008138	protein tyrosine/serine/threonine phosphatase activity	molecular_function	0.094782	1	1	66	7	4727	ENSSSCG00000010831	DUSP10|
GO:0051493	regulation of cytoskeleton organization	biological_process	0.094858	1	3	66	73	4727	ENSSSCG00000022916,ENSSSCG00000001050,ENSSSCG00000016925	EVL|EDN1|PLK2|
GO:0031175	neuron projection development	biological_process	0.094926	1	4	66	114	4727	ENSSSCG00000026383,ENSSSCG00000026412,ENSSSCG00000005724,ENSSSCG00000006495	NRP2|-|SETX|SEMA4A|
GO:0043233	organelle lumen	cellular_component	0.095033	1	12	66	542	4727	ENSSSCG00000028326,ENSSSCG00000008647,ENSSSCG00000026362,ENSSSCG00000009806,ENSSSCG00000005724,ENSSSCG00000015525,ENSSSCG00000001912,ENSSSCG00000016520,ENSSSCG00000021725,ENSSSCG00000010831,ENSSSCG00000022486,ENSSSCG00000023304	NR4A1|CMPK2|HES1|SETD1B|SETX|TOR3A|PML|CREB3L2|PDS5B|DUSP10|CBLB|SRRM2|
GO:0035097	histone methyltransferase complex	cellular_component	0.095763	1	1	66	6	4727	ENSSSCG00000009806	SETD1B|
GO:0006954	inflammatory response	biological_process	0.095961	1	3	66	78	4727	ENSSSCG00000024996,ENSSSCG00000010831,ENSSSCG00000011951	-|DUSP10|NFKBIZ|
GO:2000142	regulation of DNA-dependent transcription, initiation	biological_process	0.095965	1	1	66	7	4727	ENSSSCG00000005724	SETX|
GO:0051145	smooth muscle cell differentiation	biological_process	0.096055	1	1	66	7	4727	ENSSSCG00000026362	HES1|
GO:0033120	positive regulation of RNA splicing	biological_process	0.096321	1	1	66	6	4727	ENSSSCG00000005724	SETX|
GO:0022008	neurogenesis	biological_process	0.096524	1	6	66	216	4727	ENSSSCG00000010831,ENSSSCG00000026362,ENSSSCG00000006495,ENSSSCG00000026412,ENSSSCG00000026383,ENSSSCG00000005724	DUSP10|HES1|SEMA4A|-|NRP2|SETX|
GO:0045747	positive regulation of Notch signaling pathway	biological_process	0.097074	1	1	66	7	4727	ENSSSCG00000026362	HES1|
GO:0031571	mitotic G1 DNA damage checkpoint	biological_process	0.097516	1	1	66	6	4727	ENSSSCG00000001912	PML|
GO:0044783	G1 DNA damage checkpoint	biological_process	0.097516	1	1	66	6	4727	ENSSSCG00000001912	PML|
GO:0061138	morphogenesis of a branching epithelium	biological_process	0.097619	1	2	66	35	4727	ENSSSCG00000001050,ENSSSCG00000001912	EDN1|PML|
GO:0042088	T-helper 1 type immune response	biological_process	0.097983	1	1	66	7	4727	ENSSSCG00000006495	SEMA4A|
GO:0090102	cochlea development	biological_process	0.097985	1	1	66	7	4727	ENSSSCG00000026362	HES1|
GO:0002456	T cell mediated immunity	biological_process	0.09805	1	1	66	7	4727	ENSSSCG00000008648	RSAD2|
GO:0050891	multicellular organismal water homeostasis	biological_process	0.09824	1	1	66	7	4727	ENSSSCG00000010991	AQP3|
GO:0001569	patterning of blood vessels	biological_process	0.098783	1	1	66	7	4727	ENSSSCG00000001050	EDN1|
GO:0040007	growth	biological_process	0.098815	1	4	66	118	4727	ENSSSCG00000006495,ENSSSCG00000026383,ENSSSCG00000001912,ENSSSCG00000026412	SEMA4A|NRP2|PML|-|
GO:0007585	respiratory gaseous exchange	biological_process	0.099042	1	1	66	7	4727	ENSSSCG00000001050	EDN1|
GO:0032611	interleukin-1 beta production	biological_process	0.099147	1	1	66	8	4727	ENSSSCG00000001912	PML|
GO:0017124	SH3 domain binding	molecular_function	0.099204	1	1	66	6	4727	ENSSSCG00000022916	EVL|
GO:0032652	regulation of interleukin-1 production	biological_process	0.099524	1	1	66	8	4727	ENSSSCG00000001912	PML|
GO:0009952	anterior/posterior pattern specification	biological_process	0.09965	1	2	66	40	4727	ENSSSCG00000026412,ENSSSCG00000026362	-|HES1|
GO:0030098	lymphocyte differentiation	biological_process	0.099664	1	2	66	35	4727	ENSSSCG00000006495,ENSSSCG00000008648	SEMA4A|RSAD2|
GO:0051640	organelle localization	biological_process	0.099714	1	3	66	72	4727	ENSSSCG00000002538,ENSSSCG00000012077,ENSSSCG00000026412	DYNC1H1|MX1|-|
GO:0042325	regulation of phosphorylation	biological_process	0.099725	1	5	66	166	4727	ENSSSCG00000026362,ENSSSCG00000010831,ENSSSCG00000009997,ENSSSCG00000001050,ENSSSCG00000001912	HES1|DUSP10|OSM|EDN1|PML|
GO:0097193	intrinsic apoptotic signaling pathway	biological_process	0.099943	1	2	66	39	4727	ENSSSCG00000013835,ENSSSCG00000001912	CASP14|PML|
GO:0030239	myofibril assembly	biological_process	0.10009	1	1	66	7	4727	ENSSSCG00000001050	EDN1|
GO:0048538	thymus development	biological_process	0.10016	1	1	66	7	4727	ENSSSCG00000026362	HES1|
GO:0019229	regulation of vasoconstriction	biological_process	0.1004	1	1	66	7	4727	ENSSSCG00000001050	EDN1|
GO:0031974	membrane-enclosed lumen	cellular_component	0.10044	1	12	66	548	4727	ENSSSCG00000010831,ENSSSCG00000021725,ENSSSCG00000016520,ENSSSCG00000022486,ENSSSCG00000023304,ENSSSCG00000009806,ENSSSCG00000028326,ENSSSCG00000008647,ENSSSCG00000026362,ENSSSCG00000015525,ENSSSCG00000001912,ENSSSCG00000005724	DUSP10|PDS5B|CREB3L2|CBLB|SRRM2|SETD1B|NR4A1|CMPK2|HES1|TOR3A|PML|SETX|
GO:0009611	response to wounding	biological_process	0.10085	1	4	66	125	4727	ENSSSCG00000011951,ENSSSCG00000010831,ENSSSCG00000024996,ENSSSCG00000006289	NFKBIZ|DUSP10|-|F5|
GO:0038084	vascular endothelial growth factor signaling pathway	biological_process	0.1009	1	1	66	7	4727	ENSSSCG00000026383	NRP2|
GO:0000049	tRNA binding	molecular_function	0.10104	1	1	66	7	4727	ENSSSCG00000010454	IFIT5|
GO:0045070	positive regulation of viral genome replication	biological_process	0.10104	1	1	66	7	4727	ENSSSCG00000010453	IFIT1|
GO:0002287	alpha-beta T cell activation involved in immune response	biological_process	0.10108	1	1	66	7	4727	ENSSSCG00000006495	SEMA4A|
GO:0002292	T cell differentiation involved in immune response	biological_process	0.10108	1	1	66	7	4727	ENSSSCG00000006495	SEMA4A|
GO:0002293	alpha-beta T cell differentiation involved in immune response	biological_process	0.10108	1	1	66	7	4727	ENSSSCG00000006495	SEMA4A|
GO:0002294	CD4-positive, alpha-beta T cell differentiation involved in immune response	biological_process	0.10108	1	1	66	7	4727	ENSSSCG00000006495	SEMA4A|
GO:0048844	artery morphogenesis	biological_process	0.1011	1	1	66	7	4727	ENSSSCG00000026362	HES1|
GO:0044707	single-multicellular organism process	biological_process	0.10119	1	21	66	1245	4727	ENSSSCG00000023868,ENSSSCG00000022916,ENSSSCG00000001912,ENSSSCG00000005724,ENSSSCG00000009997,ENSSSCG00000015074,ENSSSCG00000026362,ENSSSCG00000028326,ENSSSCG00000026412,ENSSSCG00000008648,ENSSSCG00000021712,ENSSSCG00000016925,ENSSSCG00000010831,ENSSSCG00000006289,ENSSSCG00000027982,ENSSSCG00000001050,ENSSSCG00000008796,ENSSSCG00000010991,ENSSSCG00000006495,ENSSSCG00000026383,ENSSSCG00000016520	C3AR1|EVL|PML|SETX|OSM|SIDT2|HES1|NR4A1|-|RSAD2|HERC6|PLK2|DUSP10|F5|ISG15|EDN1|RBM47|AQP3|SEMA4A|NRP2|CREB3L2|
GO:0072028	nephron morphogenesis	biological_process	0.10147	1	1	66	8	4727	ENSSSCG00000026362	HES1|
GO:0019201	nucleotide kinase activity	molecular_function	0.10151	1	1	66	7	4727	ENSSSCG00000008647	CMPK2|
GO:0002718	regulation of cytokine production involved in immune response	biological_process	0.10238	1	1	66	8	4727	ENSSSCG00000008648	RSAD2|
GO:0031256	leading edge membrane	cellular_component	0.10239	1	1	66	7	4727	ENSSSCG00000010454	IFIT5|
GO:0046888	negative regulation of hormone secretion	biological_process	0.1024	1	1	66	8	4727	ENSSSCG00000009997	OSM|
GO:0006278	RNA-dependent DNA replication	biological_process	0.10284	1	1	66	8	4727	ENSSSCG00000001912	PML|
GO:0055080	cation homeostasis	biological_process	0.1031	1	3	66	75	4727	ENSSSCG00000023868,ENSSSCG00000001912,ENSSSCG00000001050	C3AR1|PML|EDN1|
GO:0032989	cellular component morphogenesis	biological_process	0.10331	1	6	66	211	4727	ENSSSCG00000026412,ENSSSCG00000001050,ENSSSCG00000026383,ENSSSCG00000015074,ENSSSCG00000006495,ENSSSCG00000026362	-|EDN1|NRP2|SIDT2|SEMA4A|HES1|
GO:0042044	fluid transport	biological_process	0.10359	1	1	66	8	4727	ENSSSCG00000010991	AQP3|
GO:0072170	metanephric tubule development	biological_process	0.10386	1	1	66	8	4727	ENSSSCG00000026362	HES1|
GO:0001819	positive regulation of cytokine production	biological_process	0.10417	1	2	66	39	4727	ENSSSCG00000008648,ENSSSCG00000023868	RSAD2|C3AR1|
GO:0006376	mRNA splice site selection	biological_process	0.10435	1	1	66	7	4727	ENSSSCG00000005724	SETX|
GO:0006302	double-strand break repair	biological_process	0.10435	1	2	66	36	4727	ENSSSCG00000001912,ENSSSCG00000005724	PML|SETX|
GO:0048812	neuron projection morphogenesis	biological_process	0.10436	1	3	66	75	4727	ENSSSCG00000026412,ENSSSCG00000026383,ENSSSCG00000006495	-|NRP2|SEMA4A|
GO:0015665	alcohol transmembrane transporter activity	molecular_function	0.1047	1	1	66	8	4727	ENSSSCG00000010991	AQP3|
GO:0080135	regulation of cellular response to stress	biological_process	0.10504	1	3	66	74	4727	ENSSSCG00000001050,ENSSSCG00000001912,ENSSSCG00000010831	EDN1|PML|DUSP10|
GO:0045665	negative regulation of neuron differentiation	biological_process	0.10515	1	1	66	8	4727	ENSSSCG00000026362	HES1|
GO:0021795	cerebral cortex cell migration	biological_process	0.10526	1	1	66	7	4727	ENSSSCG00000026383	NRP2|
GO:0005126	cytokine receptor binding	molecular_function	0.10539	1	2	66	44	4727	ENSSSCG00000009542,ENSSSCG00000009997	TNFSF13B|OSM|
GO:0042506	tyrosine phosphorylation of Stat5 protein	biological_process	0.10577	1	1	66	7	4727	ENSSSCG00000009997	OSM|
GO:0071156	regulation of cell cycle arrest	biological_process	0.10592	1	1	66	7	4727	ENSSSCG00000001912	PML|
GO:0043500	muscle adaptation	biological_process	0.1063	1	1	66	8	4727	ENSSSCG00000001050	EDN1|
GO:0010623	developmental programmed cell death	biological_process	0.10636	1	1	66	7	4727	ENSSSCG00000001912	PML|
GO:0071359	cellular response to dsRNA	biological_process	0.10684	1	1	66	7	4727	ENSSSCG00000010453	IFIT1|
GO:0030424	axon	cellular_component	0.10711	1	2	66	37	4727	ENSSSCG00000005724,ENSSSCG00000026383	SETX|NRP2|
GO:0018105	peptidyl-serine phosphorylation	biological_process	0.10723	1	2	66	38	4727	ENSSSCG00000024996,ENSSSCG00000009997	-|OSM|
GO:0006220	pyrimidine nucleotide metabolic process	biological_process	0.10737	1	1	66	8	4727	ENSSSCG00000008647	CMPK2|
GO:0006221	pyrimidine nucleotide biosynthetic process	biological_process	0.10737	1	1	66	8	4727	ENSSSCG00000008647	CMPK2|
GO:0017111	nucleoside-triphosphatase activity	molecular_function	0.10787	1	6	66	212	4727	ENSSSCG00000017148,ENSSSCG00000012077,ENSSSCG00000002538,ENSSSCG00000012076,ENSSSCG00000015525,ENSSSCG00000017146	-|MX1|DYNC1H1|MX2|TOR3A|RNF213|
GO:0060674	placenta blood vessel development	biological_process	0.10791	1	1	66	8	4727	ENSSSCG00000026362	HES1|
GO:0032835	glomerulus development	biological_process	0.10799	1	1	66	8	4727	ENSSSCG00000026362	HES1|
GO:0032922	circadian regulation of gene expression	biological_process	0.10807	1	1	66	7	4727	ENSSSCG00000001912	PML|
GO:0044003	modification by symbiont of host morphology or physiology	biological_process	0.10837	1	1	66	8	4727	ENSSSCG00000010453	IFIT1|
GO:0002009	morphogenesis of an epithelium	biological_process	0.10908	1	3	66	76	4727	ENSSSCG00000001912,ENSSSCG00000001050,ENSSSCG00000026362	PML|EDN1|HES1|
GO:0007200	phospholipase C-activating G-protein coupled receptor signaling pathway	biological_process	0.10927	1	1	66	9	4727	ENSSSCG00000001050	EDN1|
GO:1901988	negative regulation of cell cycle phase transition	biological_process	0.11014	1	2	66	37	4727	ENSSSCG00000001912,ENSSSCG00000016925	PML|PLK2|
GO:0002708	positive regulation of lymphocyte mediated immunity	biological_process	0.11027	1	1	66	7	4727	ENSSSCG00000008648	RSAD2|
GO:0002068	glandular epithelial cell development	biological_process	0.11054	1	1	66	7	4727	ENSSSCG00000015074	SIDT2|
GO:0003309	type B pancreatic cell differentiation	biological_process	0.11054	1	1	66	7	4727	ENSSSCG00000015074	SIDT2|
GO:0003323	type B pancreatic cell development	biological_process	0.11054	1	1	66	7	4727	ENSSSCG00000015074	SIDT2|
GO:0051353	positive regulation of oxidoreductase activity	biological_process	0.11077	1	1	66	8	4727	ENSSSCG00000001050	EDN1|
GO:0001763	morphogenesis of a branching structure	biological_process	0.11121	1	2	66	38	4727	ENSSSCG00000001050,ENSSSCG00000001912	EDN1|PML|
GO:2000779	regulation of double-strand break repair	biological_process	0.11191	1	1	66	9	4727	ENSSSCG00000001912	PML|
GO:0051348	negative regulation of transferase activity	biological_process	0.11223	1	2	66	40	4727	ENSSSCG00000001912,ENSSSCG00000010831	PML|DUSP10|
GO:0051568	histone H3-K4 methylation	biological_process	0.11227	1	1	66	7	4727	ENSSSCG00000009806	SETD1B|
GO:0021872	forebrain generation of neurons	biological_process	0.11268	1	1	66	8	4727	ENSSSCG00000026383	NRP2|
GO:0021879	forebrain neuron differentiation	biological_process	0.11268	1	1	66	8	4727	ENSSSCG00000026383	NRP2|
GO:0044773	mitotic DNA damage checkpoint	biological_process	0.1128	1	1	66	7	4727	ENSSSCG00000001912	PML|
GO:0005615	extracellular space	cellular_component	0.11283	1	5	66	192	4727	ENSSSCG00000001050,ENSSSCG00000011547,ENSSSCG00000009997,ENSSSCG00000006289,ENSSSCG00000006495	EDN1|CPNE9|OSM|F5|SEMA4A|
GO:0045168	cell-cell signaling involved in cell fate commitment	biological_process	0.11414	1	1	66	8	4727	ENSSSCG00000026362	HES1|
GO:0008156	negative regulation of DNA replication	biological_process	0.11421	1	1	66	8	4727	ENSSSCG00000001912	PML|
GO:0010332	response to gamma radiation	biological_process	0.1143	1	1	66	8	4727	ENSSSCG00000001912	PML|
GO:0032612	interleukin-1 production	biological_process	0.1143	1	1	66	9	4727	ENSSSCG00000001912	PML|
GO:0034504	protein localization to nucleus	biological_process	0.11443	1	2	66	42	4727	ENSSSCG00000001912,ENSSSCG00000026362	PML|HES1|
GO:0030218	erythrocyte differentiation	biological_process	0.11451	1	1	66	9	4727	ENSSSCG00000027982	ISG15|
GO:0071702	organic substance transport	biological_process	0.11463	1	9	66	385	4727	ENSSSCG00000015074,ENSSSCG00000026362,ENSSSCG00000001912,ENSSSCG00000001050,ENSSSCG00000010991,ENSSSCG00000003797,ENSSSCG00000025932,ENSSSCG00000010453,ENSSSCG00000008648	SIDT2|HES1|PML|EDN1|AQP3|DIRAS3|AP1S3|IFIT1|RSAD2|
GO:0017038	protein import	biological_process	0.11483	1	2	66	41	4727	ENSSSCG00000001912,ENSSSCG00000026362	PML|HES1|
GO:0006979	response to oxidative stress	biological_process	0.1149	1	2	66	39	4727	ENSSSCG00000001912,ENSSSCG00000005724	PML|SETX|
GO:0043933	macromolecular complex subunit organization	biological_process	0.11493	1	8	66	339	4727	ENSSSCG00000016925,ENSSSCG00000026362,ENSSSCG00000027580,ENSSSCG00000002538,ENSSSCG00000009882,ENSSSCG00000005724,ENSSSCG00000001912,ENSSSCG00000022916	PLK2|HES1|-|DYNC1H1|OAS1|SETX|PML|EVL|
GO:0050710	negative regulation of cytokine secretion	biological_process	0.1151	1	1	66	8	4727	ENSSSCG00000001912	PML|
GO:0071322	cellular response to carbohydrate stimulus	biological_process	0.11553	1	1	66	8	4727	ENSSSCG00000015074	SIDT2|
GO:0071326	cellular response to monosaccharide stimulus	biological_process	0.11553	1	1	66	8	4727	ENSSSCG00000015074	SIDT2|
GO:0071331	cellular response to hexose stimulus	biological_process	0.11553	1	1	66	8	4727	ENSSSCG00000015074	SIDT2|
GO:0071333	cellular response to glucose stimulus	biological_process	0.11553	1	1	66	8	4727	ENSSSCG00000015074	SIDT2|
GO:0002286	T cell activation involved in immune response	biological_process	0.11583	1	1	66	8	4727	ENSSSCG00000006495	SEMA4A|
GO:0030182	neuron differentiation	biological_process	0.11618	1	5	66	175	4727	ENSSSCG00000006495,ENSSSCG00000026362,ENSSSCG00000005724,ENSSSCG00000026383,ENSSSCG00000026412	SEMA4A|HES1|SETX|NRP2|-|
GO:0071300	cellular response to retinoic acid	biological_process	0.11639	1	1	66	7	4727	ENSSSCG00000005724	SETX|
GO:0007422	peripheral nervous system development	biological_process	0.11667	1	1	66	9	4727	ENSSSCG00000009997	OSM|
GO:0016363	nuclear matrix	cellular_component	0.11706	1	1	66	8	4727	ENSSSCG00000001912	PML|
GO:0043583	ear development	biological_process	0.11745	1	2	66	41	4727	ENSSSCG00000001050,ENSSSCG00000026362	EDN1|HES1|
GO:0009987	cellular process	biological_process	0.11765	1	51	66	3313	4727	ENSSSCG00000010451,ENSSSCG00000024398,ENSSSCG00000026383,ENSSSCG00000024996,ENSSSCG00000003797,ENSSSCG00000016520,ENSSSCG00000005738,ENSSSCG00000026552,ENSSSCG00000030548,ENSSSCG00000009806,ENSSSCG00000022912,ENSSSCG00000002538,ENSSSCG00000026412,ENSSSCG00000022486,ENSSSCG00000010831,ENSSSCG00000015071,ENSSSCG00000027982,ENSSSCG00000023868,ENSSSCG00000001912,ENSSSCG00000017146,ENSSSCG00000015074,…	IFIT2|-|NRP2|-|DIRAS3|CREB3L2|RALGDS|HIATL1|HERC5|SETD1B|NT5C3A|DYNC1H1|-|CBLB|DUSP10|SIK3|ISG15|C3AR1|PML|RNF213|SIDT2|HES1|MX2|CMPK2|IFIT1|MX1|EDN1|RBM47|IFIT3|AQP3|PLXNA2|OAS1|SEMA4A|-|CASP14|IFIT5|AP1S3|HERC6|RSAD2|PLK2|PDS5B|-|EVL|SETX|NFKBIZ|OSM|-|STAT1|BCL2L14|-|NR4A1|
GO:0016462	pyrophosphatase activity	molecular_function	0.11818	1	6	66	218	4727	ENSSSCG00000017148,ENSSSCG00000002538,ENSSSCG00000012077,ENSSSCG00000012076,ENSSSCG00000015525,ENSSSCG00000017146	-|DYNC1H1|MX1|MX2|TOR3A|RNF213|
GO:0051129	negative regulation of cellular component organization	biological_process	0.11839	1	3	66	81	4727	ENSSSCG00000006495,ENSSSCG00000022916,ENSSSCG00000001912	SEMA4A|EVL|PML|
GO:0010557	positive regulation of macromolecule biosynthetic process	biological_process	0.11874	1	6	66	232	4727	ENSSSCG00000009997,ENSSSCG00000005724,ENSSSCG00000001050,ENSSSCG00000028326,ENSSSCG00000026362,ENSSSCG00000016520	OSM|SETX|EDN1|NR4A1|HES1|CREB3L2|
GO:0032204	regulation of telomere maintenance	biological_process	0.11924	1	1	66	9	4727	ENSSSCG00000001912	PML|
GO:0048663	neuron fate commitment	biological_process	0.11958	1	1	66	10	4727	ENSSSCG00000026362	HES1|
GO:0051130	positive regulation of cellular component organization	biological_process	0.11962	1	4	66	130	4727	ENSSSCG00000022916,ENSSSCG00000001912,ENSSSCG00000001050,ENSSSCG00000005724	EVL|PML|EDN1|SETX|
GO:0031098	stress-activated protein kinase signaling cascade	biological_process	0.1197	1	2	66	37	4727	ENSSSCG00000001050,ENSSSCG00000010831	EDN1|DUSP10|
GO:0050790	regulation of catalytic activity	biological_process	0.11985	1	8	66	334	4727	ENSSSCG00000010831,ENSSSCG00000010453,ENSSSCG00000028326,ENSSSCG00000013835,ENSSSCG00000009882,ENSSSCG00000005738,ENSSSCG00000001912,ENSSSCG00000001050	DUSP10|IFIT1|NR4A1|CASP14|OAS1|RALGDS|PML|EDN1|
GO:0001990	regulation of systemic arterial blood pressure by hormone	biological_process	0.11992	1	1	66	9	4727	ENSSSCG00000001050	EDN1|
GO:0001228	RNA polymerase II transcription regulatory region sequence-specific DNA binding transcription factor activity involved in positive regulation of transcription	molecular_function	0.12002	1	2	66	45	4727	ENSSSCG00000016520,ENSSSCG00000028326	CREB3L2|NR4A1|
GO:0032496	response to lipopolysaccharide	biological_process	0.12014	1	2	66	40	4727	ENSSSCG00000010831,ENSSSCG00000008647	DUSP10|CMPK2|
GO:0002066	columnar/cuboidal epithelial cell development	biological_process	0.12025	1	1	66	8	4727	ENSSSCG00000015074	SIDT2|
GO:0045682	regulation of epidermis development	biological_process	0.1209	1	1	66	9	4727	ENSSSCG00000026362	HES1|
GO:0048659	smooth muscle cell proliferation	biological_process	0.12133	1	1	66	10	4727	ENSSSCG00000001050	EDN1|
GO:0048660	regulation of smooth muscle cell proliferation	biological_process	0.12133	1	1	66	10	4727	ENSSSCG00000001050	EDN1|
GO:0032233	positive regulation of actin filament bundle assembly	biological_process	0.12133	1	1	66	9	4727	ENSSSCG00000022916	EVL|
GO:0051496	positive regulation of stress fiber assembly	biological_process	0.12133	1	1	66	9	4727	ENSSSCG00000022916	EVL|
GO:0044432	endoplasmic reticulum part	cellular_component	0.12166	1	3	66	79	4727	ENSSSCG00000008648,ENSSSCG00000001912,ENSSSCG00000015525	RSAD2|PML|TOR3A|
GO:0035904	aorta development	biological_process	0.12174	1	1	66	8	4727	ENSSSCG00000026362	HES1|
GO:0016818	hydrolase activity, acting on acid anhydrides, in phosphorus-containing anhydrides	molecular_function	0.12204	1	6	66	220	4727	ENSSSCG00000017146,ENSSSCG00000015525,ENSSSCG00000012077,ENSSSCG00000002538,ENSSSCG00000012076,ENSSSCG00000017148	RNF213|TOR3A|MX1|DYNC1H1|MX2|-|
GO:0046887	positive regulation of hormone secretion	biological_process	0.12228	1	1	66	10	4727	ENSSSCG00000001050	EDN1|
GO:0035639	purine ribonucleoside triphosphate binding	molecular_function	0.1223	1	10	66	434	4727	ENSSSCG00000017146,ENSSSCG00000009882,ENSSSCG00000026336,ENSSSCG00000015525,ENSSSCG00000012076,ENSSSCG00000015071,ENSSSCG00000012077,ENSSSCG00000016925,ENSSSCG00000024996,ENSSSCG00000003797	RNF213|OAS1|-|TOR3A|MX2|SIK3|MX1|PLK2|-|DIRAS3|
GO:0043405	regulation of MAP kinase activity	biological_process	0.12252	1	2	66	41	4727	ENSSSCG00000010831,ENSSSCG00000001050	DUSP10|EDN1|
GO:0030901	midbrain development	biological_process	0.12266	1	1	66	10	4727	ENSSSCG00000026362	HES1|
GO:0005575	cellular_component	cellular_component	0.1231	1	57	66	3795	4727	ENSSSCG00000016925,ENSSSCG00000021725,ENSSSCG00000021712,ENSSSCG00000008648,ENSSSCG00000011547,ENSSSCG00000029531,ENSSSCG00000028326,ENSSSCG00000000623,ENSSSCG00000016057,ENSSSCG00000023785,ENSSSCG00000027372,ENSSSCG00000005724,ENSSSCG00000011951,ENSSSCG00000009997,ENSSSCG00000022916,ENSSSCG00000008786,ENSSSCG00000012077,ENSSSCG00000010453,ENSSSCG00000001341,ENSSSCG00000008713,ENSSSCG00000010454,…	PLK2|PDS5B|HERC6|RSAD2|CPNE9|-|NR4A1|BCL2L14|STAT1|-|SAMD9|SETX|NFKBIZ|OSM|EVL|-|MX1|IFIT1|SLA-11|KIAA0232|IFIT5|CASP14|SEMA4A|AKAP7|AQP3|PLXNA2|OAS1|IFIT3|RBM47|EDN1|ISG15|SIK3|F5|DUSP10|CBLB|SRRM2|-|MX2|CMPK2|HES1|SIDT2|TOR3A|C3AR1|PML|CREB3L2|DIRAS3|-|TNFSF13B|-|NRP2|IFIT2|DYNC1H1|NT5C3A|HERC5|SETD1B|HIATL1|RALGDS|
GO:0042771	intrinsic apoptotic signaling pathway in response to DNA damage by p53 class mediator	biological_process	0.12325	1	1	66	9	4727	ENSSSCG00000001912	PML|
GO:0022618	ribonucleoprotein complex assembly	biological_process	0.12371	1	2	66	44	4727	ENSSSCG00000002538,ENSSSCG00000005724	DYNC1H1|SETX|
GO:0035295	tube development	biological_process	0.12376	1	3	66	80	4727	ENSSSCG00000001050,ENSSSCG00000001912,ENSSSCG00000026362	EDN1|PML|HES1|
GO:0001883	purine nucleoside binding	molecular_function	0.12388	1	10	66	435	4727	ENSSSCG00000012076,ENSSSCG00000026336,ENSSSCG00000015525,ENSSSCG00000009882,ENSSSCG00000017146,ENSSSCG00000003797,ENSSSCG00000024996,ENSSSCG00000016925,ENSSSCG00000012077,ENSSSCG00000015071	MX2|-|TOR3A|OAS1|RNF213|DIRAS3|-|PLK2|MX1|SIK3|
GO:0032550	purine ribonucleoside binding	molecular_function	0.12388	1	10	66	435	4727	ENSSSCG00000015525,ENSSSCG00000026336,ENSSSCG00000017146,ENSSSCG00000009882,ENSSSCG00000012076,ENSSSCG00000016925,ENSSSCG00000024996,ENSSSCG00000003797,ENSSSCG00000015071,ENSSSCG00000012077	TOR3A|-|RNF213|OAS1|MX2|PLK2|-|DIRAS3|SIK3|MX1|
GO:0016817	hydrolase activity, acting on acid anhydrides	molecular_function	0.12424	1	6	66	221	4727	ENSSSCG00000017148,ENSSSCG00000012076,ENSSSCG00000012077,ENSSSCG00000002538,ENSSSCG00000015525,ENSSSCG00000017146	-|MX2|MX1|DYNC1H1|TOR3A|RNF213|
GO:0046939	nucleotide phosphorylation	biological_process	0.12466	1	1	66	9	4727	ENSSSCG00000008647	CMPK2|
GO:0014013	regulation of gliogenesis	biological_process	0.12487	1	1	66	10	4727	ENSSSCG00000026362	HES1|
GO:0002705	positive regulation of leukocyte mediated immunity	biological_process	0.12488	1	1	66	8	4727	ENSSSCG00000008648	RSAD2|
GO:0030800	negative regulation of cyclic nucleotide metabolic process	biological_process	0.12496	1	1	66	9	4727	ENSSSCG00000001050	EDN1|
GO:0030803	negative regulation of cyclic nucleotide biosynthetic process	biological_process	0.12496	1	1	66	9	4727	ENSSSCG00000001050	EDN1|
GO:0030809	negative regulation of nucleotide biosynthetic process	biological_process	0.12496	1	1	66	9	4727	ENSSSCG00000001050	EDN1|
GO:0030815	negative regulation of cAMP metabolic process	biological_process	0.12496	1	1	66	9	4727	ENSSSCG00000001050	EDN1|
GO:0030818	negative regulation of cAMP biosynthetic process	biological_process	0.12496	1	1	66	9	4727	ENSSSCG00000001050	EDN1|
GO:0045980	negative regulation of nucleotide metabolic process	biological_process	0.12496	1	1	66	9	4727	ENSSSCG00000001050	EDN1|
GO:1900372	negative regulation of purine nucleotide biosynthetic process	biological_process	0.12496	1	1	66	9	4727	ENSSSCG00000001050	EDN1|
GO:1900543	negative regulation of purine nucleotide metabolic process	biological_process	0.12496	1	1	66	9	4727	ENSSSCG00000001050	EDN1|
GO:0072207	metanephric epithelium development	biological_process	0.1254	1	1	66	9	4727	ENSSSCG00000026362	HES1|
GO:0061326	renal tubule development	biological_process	0.12543	1	1	66	10	4727	ENSSSCG00000026362	HES1|
GO:0072080	nephron tubule development	biological_process	0.12543	1	1	66	10	4727	ENSSSCG00000026362	HES1|
GO:0001882	nucleoside binding	molecular_function	0.12547	1	10	66	436	4727	ENSSSCG00000012077,ENSSSCG00000015071,ENSSSCG00000003797,ENSSSCG00000024996,ENSSSCG00000016925,ENSSSCG00000012076,ENSSSCG00000009882,ENSSSCG00000017146,ENSSSCG00000015525,ENSSSCG00000026336	MX1|SIK3|DIRAS3|-|PLK2|MX2|OAS1|RNF213|TOR3A|-|
GO:0032549	ribonucleoside binding	molecular_function	0.12547	1	10	66	436	4727	ENSSSCG00000012076,ENSSSCG00000017146,ENSSSCG00000009882,ENSSSCG00000015525,ENSSSCG00000026336,ENSSSCG00000015071,ENSSSCG00000012077,ENSSSCG00000024996,ENSSSCG00000016925,ENSSSCG00000003797	MX2|RNF213|OAS1|TOR3A|-|SIK3|MX1|-|PLK2|DIRAS3|
GO:0042995	cell projection	cellular_component	0.12559	1	6	66	223	4727	ENSSSCG00000002538,ENSSSCG00000010454,ENSSSCG00000005738,ENSSSCG00000022916,ENSSSCG00000026383,ENSSSCG00000005724	DYNC1H1|IFIT5|RALGDS|EVL|NRP2|SETX|
GO:0034101	erythrocyte homeostasis	biological_process	0.1256	1	1	66	10	4727	ENSSSCG00000027982	ISG15|
GO:0044774	mitotic DNA integrity checkpoint	biological_process	0.12566	1	1	66	8	4727	ENSSSCG00000001912	PML|
GO:0015031	protein transport	biological_process	0.12591	1	6	66	230	4727	ENSSSCG00000026362,ENSSSCG00000003797,ENSSSCG00000008648,ENSSSCG00000010453,ENSSSCG00000001912,ENSSSCG00000025932	HES1|DIRAS3|RSAD2|IFIT1|PML|AP1S3|
GO:0045321	leukocyte activation	biological_process	0.12593	1	3	66	85	4727	ENSSSCG00000006495,ENSSSCG00000026362,ENSSSCG00000008648	SEMA4A|HES1|RSAD2|
GO:0048562	embryonic organ morphogenesis	biological_process	0.12626	1	2	66	46	4727	ENSSSCG00000026362,ENSSSCG00000001050	HES1|EDN1|
GO:0032501	multicellular organismal process	biological_process	0.12631	1	21	66	1276	4727	ENSSSCG00000008648,ENSSSCG00000021712,ENSSSCG00000026412,ENSSSCG00000027982,ENSSSCG00000006289,ENSSSCG00000016925,ENSSSCG00000010831,ENSSSCG00000005724,ENSSSCG00000009997,ENSSSCG00000022916,ENSSSCG00000023868,ENSSSCG00000001912,ENSSSCG00000028326,ENSSSCG00000026362,ENSSSCG00000015074,ENSSSCG00000026383,ENSSSCG00000016520,ENSSSCG00000010991,ENSSSCG00000008796,ENSSSCG00000001050,ENSSSCG00000006495	RSAD2|HERC6|-|ISG15|F5|PLK2|DUSP10|SETX|OSM|EVL|C3AR1|PML|NR4A1|HES1|SIDT2|NRP2|CREB3L2|AQP3|RBM47|EDN1|SEMA4A|
GO:0031981	nuclear lumen	cellular_component	0.12647	1	11	66	511	4727	ENSSSCG00000026362,ENSSSCG00000008647,ENSSSCG00000028326,ENSSSCG00000009806,ENSSSCG00000005724,ENSSSCG00000001912,ENSSSCG00000016520,ENSSSCG00000021725,ENSSSCG00000010831,ENSSSCG00000023304,ENSSSCG00000022486	HES1|CMPK2|NR4A1|SETD1B|SETX|PML|CREB3L2|PDS5B|DUSP10|SRRM2|CBLB|
GO:0002757	immune response-activating signal transduction	biological_process	0.12649	1	2	66	47	4727	ENSSSCG00000008648,ENSSSCG00000024996	RSAD2|-|
GO:0045931	positive regulation of mitotic cell cycle	biological_process	0.12678	1	1	66	9	4727	ENSSSCG00000026362	HES1|
GO:0021532	neural tube patterning	biological_process	0.12769	1	1	66	9	4727	ENSSSCG00000026362	HES1|
GO:1901990	regulation of mitotic cell cycle phase transition	biological_process	0.12793	1	2	66	41	4727	ENSSSCG00000016925,ENSSSCG00000001912	PLK2|PML|
GO:0001889	liver development	biological_process	0.12821	1	1	66	9	4727	ENSSSCG00000026362	HES1|
GO:0061008	hepaticobiliary system development	biological_process	0.12821	1	1	66	9	4727	ENSSSCG00000026362	HES1|
GO:0090407	organophosphate biosynthetic process	biological_process	0.1285	1	3	66	88	4727	ENSSSCG00000008647,ENSSSCG00000009882,ENSSSCG00000001050	CMPK2|OAS1|EDN1|
GO:0019722	calcium-mediated signaling	biological_process	0.12867	1	1	66	10	4727	ENSSSCG00000001050	EDN1|
GO:0009132	nucleoside diphosphate metabolic process	biological_process	0.1289	1	1	66	10	4727	ENSSSCG00000008647	CMPK2|
GO:0030104	water homeostasis	biological_process	0.1292	1	1	66	10	4727	ENSSSCG00000010991	AQP3|
GO:0061005	cell differentiation involved in kidney development	biological_process	0.12947	1	1	66	10	4727	ENSSSCG00000026362	HES1|
GO:0071826	ribonucleoprotein complex subunit organization	biological_process	0.12963	1	2	66	45	4727	ENSSSCG00000002538,ENSSSCG00000005724	DYNC1H1|SETX|
GO:0001678	cellular glucose homeostasis	biological_process	0.12999	1	1	66	9	4727	ENSSSCG00000015074	SIDT2|
GO:0031401	positive regulation of protein modification process	biological_process	0.13157	1	4	66	128	4727	ENSSSCG00000001050,ENSSSCG00000001912,ENSSSCG00000009997,ENSSSCG00000026362	EDN1|PML|OSM|HES1|
GO:0031032	actomyosin structure organization	biological_process	0.13162	1	1	66	9	4727	ENSSSCG00000001050	EDN1|
GO:0018209	peptidyl-serine modification	biological_process	0.13179	1	2	66	43	4727	ENSSSCG00000024996,ENSSSCG00000009997	-|OSM|
GO:0030968	endoplasmic reticulum unfolded protein response	biological_process	0.13212	1	1	66	10	4727	ENSSSCG00000016520	CREB3L2|
GO:0034620	cellular response to unfolded protein	biological_process	0.13212	1	1	66	10	4727	ENSSSCG00000016520	CREB3L2|
GO:0003143	embryonic heart tube morphogenesis	biological_process	0.13218	1	1	66	9	4727	ENSSSCG00000026362	HES1|
GO:0010824	regulation of centrosome duplication	biological_process	0.13237	1	1	66	10	4727	ENSSSCG00000016925	PLK2|
GO:0046605	regulation of centrosome cycle	biological_process	0.13237	1	1	66	10	4727	ENSSSCG00000016925	PLK2|
GO:0002764	immune response-regulating signaling pathway	biological_process	0.13243	1	2	66	48	4727	ENSSSCG00000008648,ENSSSCG00000024996	RSAD2|-|
GO:0043331	response to dsRNA	biological_process	0.13264	1	1	66	9	4727	ENSSSCG00000010453	IFIT1|
GO:0051099	positive regulation of binding	biological_process	0.13298	1	1	66	10	4727	ENSSSCG00000026362	HES1|
GO:0007420	brain development	biological_process	0.13307	1	3	66	85	4727	ENSSSCG00000026383,ENSSSCG00000026412,ENSSSCG00000026362	NRP2|-|HES1|
GO:0060443	mammary gland morphogenesis	biological_process	0.13309	1	1	66	9	4727	ENSSSCG00000001912	PML|
GO:0033555	multicellular organismal response to stress	biological_process	0.13313	1	1	66	9	4727	ENSSSCG00000009997	OSM|
GO:0071705	nitrogen compound transport	biological_process	0.13342	1	3	66	86	4727	ENSSSCG00000010991,ENSSSCG00000001050,ENSSSCG00000015074	AQP3|EDN1|SIDT2|
GO:0032649	regulation of interferon-gamma production	biological_process	0.13347	1	1	66	10	4727	ENSSSCG00000027982	ISG15|
GO:0032555	purine ribonucleotide binding	molecular_function	0.13351	1	10	66	441	4727	ENSSSCG00000026336,ENSSSCG00000015525,ENSSSCG00000017146,ENSSSCG00000009882,ENSSSCG00000012076,ENSSSCG00000024996,ENSSSCG00000016925,ENSSSCG00000003797,ENSSSCG00000015071,ENSSSCG00000012077	-|TOR3A|RNF213|OAS1|MX2|-|PLK2|DIRAS3|SIK3|MX1|
GO:0051346	negative regulation of hydrolase activity	biological_process	0.13385	1	2	66	47	4727	ENSSSCG00000010453,ENSSSCG00000028326	IFIT1|NR4A1|
GO:0003725	double-stranded RNA binding	molecular_function	0.13478	1	1	66	9	4727	ENSSSCG00000009882	OAS1|
GO:0002237	response to molecule of bacterial origin	biological_process	0.13527	1	2	66	43	4727	ENSSSCG00000008647,ENSSSCG00000010831	CMPK2|DUSP10|
GO:1901618	organic hydroxy compound transmembrane transporter activity	molecular_function	0.13574	1	1	66	10	4727	ENSSSCG00000010991	AQP3|
GO:0016791	phosphatase activity	molecular_function	0.13589	1	2	66	43	4727	ENSSSCG00000022912,ENSSSCG00000010831	NT5C3A|DUSP10|
GO:0002532	production of molecular mediator involved in inflammatory response	biological_process	0.13591	1	1	66	9	4727	ENSSSCG00000010831	DUSP10|
GO:0002690	positive regulation of leukocyte chemotaxis	biological_process	0.13615	1	1	66	13	4727	ENSSSCG00000023868	C3AR1|
GO:0006605	protein targeting	biological_process	0.13652	1	3	66	89	4727	ENSSSCG00000001912,ENSSSCG00000025932,ENSSSCG00000026362	PML|AP1S3|HES1|
GO:0072210	metanephric nephron development	biological_process	0.13661	1	1	66	10	4727	ENSSSCG00000026362	HES1|
GO:0017076	purine nucleotide binding	molecular_function	0.13731	1	10	66	444	4727	ENSSSCG00000009882,ENSSSCG00000017146,ENSSSCG00000026336,ENSSSCG00000015525,ENSSSCG00000012076,ENSSSCG00000012077,ENSSSCG00000015071,ENSSSCG00000003797,ENSSSCG00000024996,ENSSSCG00000016925	OAS1|RNF213|-|TOR3A|MX2|MX1|SIK3|DIRAS3|-|PLK2|
GO:0034708	methyltransferase complex	cellular_component	0.1374	1	1	66	9	4727	ENSSSCG00000009806	SETD1B|
GO:0043408	regulation of MAPK cascade	biological_process	0.13748	1	3	66	87	4727	ENSSSCG00000010831,ENSSSCG00000001050,ENSSSCG00000009997	DUSP10|EDN1|OSM|
GO:0010769	regulation of cell morphogenesis involved in differentiation	biological_process	0.13765	1	2	66	44	4727	ENSSSCG00000006495,ENSSSCG00000026412	SEMA4A|-|
GO:0032553	ribonucleotide binding	molecular_function	0.13843	1	10	66	444	4727	ENSSSCG00000012077,ENSSSCG00000015071,ENSSSCG00000003797,ENSSSCG00000024996,ENSSSCG00000016925,ENSSSCG00000009882,ENSSSCG00000017146,ENSSSCG00000015525,ENSSSCG00000026336,ENSSSCG00000012076	MX1|SIK3|DIRAS3|-|PLK2|OAS1|RNF213|TOR3A|-|MX2|
GO:0061061	muscle structure development	biological_process	0.13858	1	3	66	89	4727	ENSSSCG00000001050,ENSSSCG00000028326,ENSSSCG00000026362	EDN1|NR4A1|HES1|
GO:0009743	response to carbohydrate stimulus	biological_process	0.13879	1	1	66	10	4727	ENSSSCG00000015074	SIDT2|
GO:0009746	response to hexose stimulus	biological_process	0.13879	1	1	66	10	4727	ENSSSCG00000015074	SIDT2|
GO:0009749	response to glucose stimulus	biological_process	0.13879	1	1	66	10	4727	ENSSSCG00000015074	SIDT2|
GO:0034284	response to monosaccharide stimulus	biological_process	0.13879	1	1	66	10	4727	ENSSSCG00000015074	SIDT2|
GO:0019538	protein metabolic process	biological_process	0.13881	1	17	66	892	4727	ENSSSCG00000001050,ENSSSCG00000009806,ENSSSCG00000030548,ENSSSCG00000013835,ENSSSCG00000024398,ENSSSCG00000024996,ENSSSCG00000001912,ENSSSCG00000017146,ENSSSCG00000009997,ENSSSCG00000026362,ENSSSCG00000022486,ENSSSCG00000021712,ENSSSCG00000016925,ENSSSCG00000017148,ENSSSCG00000010831,ENSSSCG00000015071,ENSSSCG00000027982	EDN1|SETD1B|HERC5|CASP14|-|-|PML|RNF213|OSM|HES1|CBLB|HERC6|PLK2|-|DUSP10|SIK3|ISG15|
GO:0015932	nucleobase-containing compound transmembrane transporter activity	molecular_function	0.13885	1	1	66	10	4727	ENSSSCG00000015074	SIDT2|
GO:0006476	protein deacetylation	biological_process	0.13959	1	1	66	11	4727	ENSSSCG00000001912	PML|
GO:0016575	histone deacetylation	biological_process	0.13959	1	1	66	11	4727	ENSSSCG00000001912	PML|
GO:0003338	metanephros morphogenesis	biological_process	0.13961	1	1	66	10	4727	ENSSSCG00000026362	HES1|
GO:0016776	phosphotransferase activity, phosphate group as acceptor	molecular_function	0.14013	1	1	66	10	4727	ENSSSCG00000008647	CMPK2|
GO:0016278	lysine N-methyltransferase activity	molecular_function	0.1403	1	1	66	9	4727	ENSSSCG00000009806	SETD1B|
GO:0016279	protein-lysine N-methyltransferase activity	molecular_function	0.1403	1	1	66	9	4727	ENSSSCG00000009806	SETD1B|
GO:0018024	histone-lysine N-methyltransferase activity	molecular_function	0.1403	1	1	66	9	4727	ENSSSCG00000009806	SETD1B|
GO:0034614	cellular response to reactive oxygen species	biological_process	0.1403	1	1	66	10	4727	ENSSSCG00000005724	SETX|
GO:0021954	central nervous system neuron development	biological_process	0.14045	1	1	66	9	4727	ENSSSCG00000026383	NRP2|
GO:0016605	PML body	cellular_component	0.14046	1	1	66	10	4727	ENSSSCG00000001912	PML|
GO:0042491	auditory receptor cell differentiation	biological_process	0.14053	1	1	66	10	4727	ENSSSCG00000026362	HES1|
GO:0007589	body fluid secretion	biological_process	0.14088	1	1	66	10	4727	ENSSSCG00000001050	EDN1|
GO:0008593	regulation of Notch signaling pathway	biological_process	0.14098	1	1	66	10	4727	ENSSSCG00000026362	HES1|
GO:0010646	regulation of cell communication	biological_process	0.14126	1	9	66	400	4727	ENSSSCG00000010831,ENSSSCG00000016925,ENSSSCG00000008648,ENSSSCG00000015074,ENSSSCG00000026362,ENSSSCG00000000623,ENSSSCG00000001912,ENSSSCG00000001050,ENSSSCG00000009997	DUSP10|PLK2|RSAD2|SIDT2|HES1|BCL2L14|PML|EDN1|OSM|
GO:0030593	neutrophil chemotaxis	biological_process	0.14126	1	1	66	11	4727	ENSSSCG00000023868	C3AR1|
GO:0002253	activation of immune response	biological_process	0.14142	1	2	66	50	4727	ENSSSCG00000024996,ENSSSCG00000008648	-|RSAD2|
GO:0090398	cellular senescence	biological_process	0.14142	1	1	66	10	4727	ENSSSCG00000001912	PML|
GO:0003156	regulation of organ formation	biological_process	0.14213	1	1	66	10	4727	ENSSSCG00000026362	HES1|
GO:0060411	cardiac septum morphogenesis	biological_process	0.14229	1	1	66	10	4727	ENSSSCG00000026362	HES1|
GO:0003151	outflow tract morphogenesis	biological_process	0.14246	1	1	66	12	4727	ENSSSCG00000026362	HES1|
GO:0021885	forebrain cell migration	biological_process	0.14246	1	1	66	10	4727	ENSSSCG00000026383	NRP2|
GO:0022029	telencephalon cell migration	biological_process	0.14246	1	1	66	10	4727	ENSSSCG00000026383	NRP2|
GO:0007507	heart development	biological_process	0.14247	1	3	66	86	4727	ENSSSCG00000026362,ENSSSCG00000026383,ENSSSCG00000001050	HES1|NRP2|EDN1|
GO:0016773	phosphotransferase activity, alcohol group as acceptor	molecular_function	0.14391	1	5	66	181	4727	ENSSSCG00000015071,ENSSSCG00000016925,ENSSSCG00000024996,ENSSSCG00000026443,ENSSSCG00000026383	SIK3|PLK2|-|-|NRP2|
GO:0006986	response to unfolded protein	biological_process	0.14435	1	1	66	11	4727	ENSSSCG00000016520	CREB3L2|
GO:0021983	pituitary gland development	biological_process	0.14442	1	1	66	11	4727	ENSSSCG00000026362	HES1|
GO:0043154	negative regulation of cysteine-type endopeptidase activity involved in apoptotic process	biological_process	0.14489	1	1	66	11	4727	ENSSSCG00000028326	NR4A1|
GO:2000117	negative regulation of cysteine-type endopeptidase activity	biological_process	0.14489	1	1	66	11	4727	ENSSSCG00000028326	NR4A1|
GO:0035967	cellular response to topologically incorrect protein	biological_process	0.14522	1	1	66	11	4727	ENSSSCG00000016520	CREB3L2|
GO:0051094	positive regulation of developmental process	biological_process	0.14542	1	4	66	144	4727	ENSSSCG00000027982,ENSSSCG00000026362,ENSSSCG00000023868,ENSSSCG00000001912	ISG15|HES1|C3AR1|PML|
GO:0051101	regulation of DNA binding	biological_process	0.14671	1	1	66	14	4727	ENSSSCG00000026362	HES1|
GO:0050708	regulation of protein secretion	biological_process	0.14685	1	2	66	45	4727	ENSSSCG00000008648,ENSSSCG00000001912	RSAD2|PML|
GO:0051241	negative regulation of multicellular organismal process	biological_process	0.14786	1	2	66	47	4727	ENSSSCG00000001912,ENSSSCG00000010831	PML|DUSP10|
GO:0008277	regulation of G-protein coupled receptor protein signaling pathway	biological_process	0.14796	1	1	66	11	4727	ENSSSCG00000001050	EDN1|
GO:0035315	hair cell differentiation	biological_process	0.14817	1	1	66	11	4727	ENSSSCG00000026362	HES1|
GO:0035601	protein deacylation	biological_process	0.14912	1	1	66	12	4727	ENSSSCG00000001912	PML|
GO:0060675	ureteric bud morphogenesis	biological_process	0.14919	1	1	66	11	4727	ENSSSCG00000026362	HES1|
GO:0003044	regulation of systemic arterial blood pressure mediated by a chemical signal	biological_process	0.14944	1	1	66	12	4727	ENSSSCG00000001050	EDN1|
GO:0005179	hormone activity	molecular_function	0.14948	1	1	66	16	4727	ENSSSCG00000001050	EDN1|
GO:0032268	regulation of cellular protein metabolic process	biological_process	0.15024	1	6	66	240	4727	ENSSSCG00000026362,ENSSSCG00000027982,ENSSSCG00000010831,ENSSSCG00000009997,ENSSSCG00000001050,ENSSSCG00000001912	HES1|ISG15|DUSP10|OSM|EDN1|PML|
GO:0060119	inner ear receptor cell development	biological_process	0.15033	1	1	66	10	4727	ENSSSCG00000026362	HES1|
GO:0051492	regulation of stress fiber assembly	biological_process	0.15083	1	1	66	11	4727	ENSSSCG00000022916	EVL|
GO:0032956	regulation of actin cytoskeleton organization	biological_process	0.15088	1	2	66	47	4727	ENSSSCG00000001050,ENSSSCG00000022916	EDN1|EVL|
GO:0007613	memory	biological_process	0.15102	1	1	66	10	4727	ENSSSCG00000016925	PLK2|
GO:0048732	gland development	biological_process	0.15115	1	2	66	48	4727	ENSSSCG00000001912,ENSSSCG00000026362	PML|HES1|
GO:0014065	phosphatidylinositol 3-kinase cascade	biological_process	0.15208	1	1	66	12	4727	ENSSSCG00000001050	EDN1|
GO:0007099	centriole replication	biological_process	0.15255	1	1	66	11	4727	ENSSSCG00000016925	PLK2|
GO:0043507	positive regulation of JUN kinase activity	biological_process	0.15294	1	1	66	10	4727	ENSSSCG00000001050	EDN1|
GO:0004683	calmodulin-dependent protein kinase activity	molecular_function	0.15307	1	1	66	10	4727	ENSSSCG00000024996	-|
GO:0007178	transmembrane receptor protein serine/threonine kinase signaling pathway	biological_process	0.15356	1	2	66	48	4727	ENSSSCG00000026362,ENSSSCG00000001912	HES1|PML|
GO:0010976	positive regulation of neuron projection development	biological_process	0.15428	1	1	66	10	4727	ENSSSCG00000005724	SETX|
GO:0051087	chaperone binding	molecular_function	0.15434	1	1	66	12	4727	ENSSSCG00000026362	HES1|
GO:0005525	GTP binding	molecular_function	0.15437	1	3	66	95	4727	ENSSSCG00000012077,ENSSSCG00000012076,ENSSSCG00000003797	MX1|MX2|DIRAS3|
GO:0061180	mammary gland epithelium development	biological_process	0.15469	1	1	66	11	4727	ENSSSCG00000001912	PML|
GO:0072009	nephron epithelium development	biological_process	0.15492	1	1	66	12	4727	ENSSSCG00000026362	HES1|
GO:0050801	ion homeostasis	biological_process	0.15531	1	3	66	91	4727	ENSSSCG00000001912,ENSSSCG00000001050,ENSSSCG00000023868	PML|EDN1|C3AR1|
GO:0048699	generation of neurons	biological_process	0.15544	1	5	66	195	4727	ENSSSCG00000005724,ENSSSCG00000026383,ENSSSCG00000026412,ENSSSCG00000006495,ENSSSCG00000026362	SETX|NRP2|-|SEMA4A|HES1|
GO:0046332	SMAD binding	molecular_function	0.15629	1	1	66	11	4727	ENSSSCG00000001912	PML|
GO:2001251	negative regulation of chromosome organization	biological_process	0.15631	1	1	66	12	4727	ENSSSCG00000001912	PML|
GO:0038034	signal transduction in absence of ligand	biological_process	0.15659	1	1	66	12	4727	ENSSSCG00000013835	CASP14|
GO:0097192	extrinsic apoptotic signaling pathway in absence of ligand	biological_process	0.15659	1	1	66	12	4727	ENSSSCG00000013835	CASP14|
GO:0035966	response to topologically incorrect protein	biological_process	0.15727	1	1	66	12	4727	ENSSSCG00000016520	CREB3L2|
GO:0034399	nuclear periphery	cellular_component	0.15732	1	1	66	11	4727	ENSSSCG00000001912	PML|
GO:0006884	cell volume homeostasis	biological_process	0.15744	1	1	66	12	4727	ENSSSCG00000010991	AQP3|
GO:0007399	nervous system development	biological_process	0.15793	1	7	66	304	4727	ENSSSCG00000026412,ENSSSCG00000026383,ENSSSCG00000005724,ENSSSCG00000009997,ENSSSCG00000010831,ENSSSCG00000006495,ENSSSCG00000026362	-|NRP2|SETX|OSM|DUSP10|SEMA4A|HES1|
GO:0030330	DNA damage response, signal transduction by p53 class mediator	biological_process	0.15805	1	1	66	11	4727	ENSSSCG00000001912	PML|
GO:0003707	steroid hormone receptor activity	molecular_function	0.15878	1	1	66	11	4727	ENSSSCG00000028326	NR4A1|
GO:0043401	steroid hormone mediated signaling pathway	biological_process	0.15878	1	1	66	11	4727	ENSSSCG00000028326	NR4A1|
GO:0031058	positive regulation of histone modification	biological_process	0.15889	1	1	66	12	4727	ENSSSCG00000001912	PML|
GO:0048708	astrocyte differentiation	biological_process	0.15903	1	1	66	12	4727	ENSSSCG00000026362	HES1|
GO:0002367	cytokine production involved in immune response	biological_process	0.15989	1	1	66	12	4727	ENSSSCG00000008648	RSAD2|
GO:0007205	protein kinase C-activating G-protein coupled receptor signaling pathway	biological_process	0.15991	1	1	66	11	4727	ENSSSCG00000001050	EDN1|
GO:0044451	nucleoplasm part	cellular_component	0.15997	1	4	66	142	4727	ENSSSCG00000023304,ENSSSCG00000001912,ENSSSCG00000028326,ENSSSCG00000009806	SRRM2|PML|NR4A1|SETD1B|
GO:0045184	establishment of protein localization	biological_process	0.15998	1	6	66	247	4727	ENSSSCG00000026362,ENSSSCG00000003797,ENSSSCG00000010453,ENSSSCG00000008648,ENSSSCG00000025932,ENSSSCG00000001912	HES1|DIRAS3|IFIT1|RSAD2|AP1S3|PML|
GO:0000785	chromatin	cellular_component	0.1602	1	2	66	58	4727	ENSSSCG00000021725,ENSSSCG00000016925	PDS5B|PLK2|
GO:0035050	embryonic heart tube development	biological_process	0.1609	1	1	66	11	4727	ENSSSCG00000026362	HES1|
GO:0009966	regulation of signal transduction	biological_process	0.16119	1	8	66	355	4727	ENSSSCG00000008648,ENSSSCG00000010831,ENSSSCG00000016925,ENSSSCG00000009997,ENSSSCG00000001912,ENSSSCG00000001050,ENSSSCG00000000623,ENSSSCG00000026362	RSAD2|DUSP10|PLK2|OSM|PML|EDN1|BCL2L14|HES1|
GO:0060993	kidney morphogenesis	biological_process	0.16199	1	1	66	13	4727	ENSSSCG00000026362	HES1|
GO:0003281	ventricular septum development	biological_process	0.16209	1	1	66	11	4727	ENSSSCG00000026362	HES1|
GO:0005507	copper ion binding	molecular_function	0.16216	1	1	66	12	4727	ENSSSCG00000006289	F5|
GO:0019001	guanyl nucleotide binding	molecular_function	0.16288	1	3	66	97	4727	ENSSSCG00000003797,ENSSSCG00000012077,ENSSSCG00000012076	DIRAS3|MX1|MX2|
GO:0032561	guanyl ribonucleotide binding	molecular_function	0.16288	1	3	66	97	4727	ENSSSCG00000012076,ENSSSCG00000012077,ENSSSCG00000003797	MX2|MX1|DIRAS3|
GO:0002688	regulation of leukocyte chemotaxis	biological_process	0.1632	1	1	66	15	4727	ENSSSCG00000023868	C3AR1|
GO:0033138	positive regulation of peptidyl-serine phosphorylation	biological_process	0.16329	1	1	66	12	4727	ENSSSCG00000009997	OSM|
GO:0006164	purine nucleotide biosynthetic process	biological_process	0.16332	1	2	66	51	4727	ENSSSCG00000009882,ENSSSCG00000001050	OAS1|EDN1|
GO:0009891	positive regulation of biosynthetic process	biological_process	0.16366	1	6	66	257	4727	ENSSSCG00000009997,ENSSSCG00000005724,ENSSSCG00000001050,ENSSSCG00000016520,ENSSSCG00000026362,ENSSSCG00000028326	OSM|SETX|EDN1|CREB3L2|HES1|NR4A1|
GO:0043407	negative regulation of MAP kinase activity	biological_process	0.16388	1	1	66	13	4727	ENSSSCG00000010831	DUSP10|
GO:0051536	iron-sulfur cluster binding	molecular_function	0.16391	1	1	66	11	4727	ENSSSCG00000008648	RSAD2|
GO:0051540	metal cluster binding	molecular_function	0.16391	1	1	66	11	4727	ENSSSCG00000008648	RSAD2|
GO:0000245	spliceosomal complex assembly	biological_process	0.1642	1	1	66	12	4727	ENSSSCG00000005724	SETX|
GO:0021761	limbic system development	biological_process	0.16435	1	1	66	12	4727	ENSSSCG00000026383	NRP2|
GO:0043066	negative regulation of apoptotic process	biological_process	0.16464	1	3	66	95	4727	ENSSSCG00000005724,ENSSSCG00000010452,ENSSSCG00000016925	SETX|IFIT3|PLK2|
GO:0072528	pyrimidine-containing compound biosynthetic process	biological_process	0.1651	1	1	66	12	4727	ENSSSCG00000008647	CMPK2|
GO:0000280	nuclear division	biological_process	0.16532	1	2	66	51	4727	ENSSSCG00000001050,ENSSSCG00000021725	EDN1|PDS5B|
GO:0007067	mitosis	biological_process	0.16532	1	2	66	51	4727	ENSSSCG00000021725,ENSSSCG00000001050	PDS5B|EDN1|
GO:0019205	nucleobase-containing compound kinase activity	molecular_function	0.16535	1	1	66	12	4727	ENSSSCG00000008647	CMPK2|
GO:0002262	myeloid cell homeostasis	biological_process	0.16539	1	1	66	13	4727	ENSSSCG00000027982	ISG15|
GO:0048146	positive regulation of fibroblast proliferation	biological_process	0.16551	1	1	66	11	4727	ENSSSCG00000001912	PML|
GO:0032231	regulation of actin filament bundle assembly	biological_process	0.16581	1	1	66	12	4727	ENSSSCG00000022916	EVL|
GO:0006690	icosanoid metabolic process	biological_process	0.16588	1	1	66	13	4727	ENSSSCG00000001050	EDN1|
GO:1901568	fatty acid derivative metabolic process	biological_process	0.16588	1	1	66	13	4727	ENSSSCG00000001050	EDN1|
GO:0045637	regulation of myeloid cell differentiation	biological_process	0.166	1	1	66	14	4727	ENSSSCG00000027982	ISG15|
GO:0048167	regulation of synaptic plasticity	biological_process	0.16608	1	1	66	13	4727	ENSSSCG00000016925	PLK2|
GO:0042054	histone methyltransferase activity	molecular_function	0.16666	1	1	66	11	4727	ENSSSCG00000009806	SETD1B|
GO:0002822	regulation of adaptive immune response based on somatic recombination of immune receptors built from immunoglobulin superfamily domains	biological_process	0.16672	1	1	66	12	4727	ENSSSCG00000008648	RSAD2|
GO:0019882	antigen processing and presentation	biological_process	0.16674	1	1	66	12	4727	ENSSSCG00000001341	SLA-11|
GO:0090100	positive regulation of transmembrane receptor protein serine/threonine kinase signaling pathway	biological_process	0.16694	1	1	66	12	4727	ENSSSCG00000026362	HES1|
GO:0072332	intrinsic apoptotic signaling pathway by p53 class mediator	biological_process	0.16758	1	1	66	13	4727	ENSSSCG00000001912	PML|
GO:0002521	leukocyte differentiation	biological_process	0.16865	1	2	66	49	4727	ENSSSCG00000006495,ENSSSCG00000008648	SEMA4A|RSAD2|
GO:0002706	regulation of lymphocyte mediated immunity	biological_process	0.16894	1	1	66	12	4727	ENSSSCG00000008648	RSAD2|
GO:0043069	negative regulation of programmed cell death	biological_process	0.16896	1	3	66	96	4727	ENSSSCG00000005724,ENSSSCG00000010452,ENSSSCG00000016925	SETX|IFIT3|PLK2|
GO:0030426	growth cone	cellular_component	0.16922	1	1	66	12	4727	ENSSSCG00000005724	SETX|
GO:0030900	forebrain development	biological_process	0.17041	1	2	66	51	4727	ENSSSCG00000026383,ENSSSCG00000026362	NRP2|HES1|
GO:0033559	unsaturated fatty acid metabolic process	biological_process	0.17054	1	1	66	13	4727	ENSSSCG00000001050	EDN1|
GO:0045893	positive regulation of transcription, DNA-dependent	biological_process	0.17058	1	5	66	202	4727	ENSSSCG00000005724,ENSSSCG00000009997,ENSSSCG00000028326,ENSSSCG00000026362,ENSSSCG00000016520	SETX|OSM|NR4A1|HES1|CREB3L2|
GO:0006357	regulation of transcription from RNA polymerase II promoter	biological_process	0.17087	1	7	66	318	4727	ENSSSCG00000028326,ENSSSCG00000026362,ENSSSCG00000016520,ENSSSCG00000001050,ENSSSCG00000009997,ENSSSCG00000005724,ENSSSCG00000011951	NR4A1|HES1|CREB3L2|EDN1|OSM|SETX|NFKBIZ|
GO:0051146	striated muscle cell differentiation	biological_process	0.17093	1	2	66	52	4727	ENSSSCG00000028326,ENSSSCG00000001050	NR4A1|EDN1|
GO:0044772	mitotic cell cycle phase transition	biological_process	0.17125	1	2	66	50	4727	ENSSSCG00000001912,ENSSSCG00000016925	PML|PLK2|
GO:0005903	brush border	cellular_component	0.17132	1	1	66	12	4727	ENSSSCG00000005738	RALGDS|
GO:0004871	signal transducer activity	molecular_function	0.17348	1	9	66	592	4727	ENSSSCG00000022486,ENSSSCG00000026412,ENSSSCG00000026383,ENSSSCG00000016925,ENSSSCG00000024996,ENSSSCG00000015621,ENSSSCG00000023868,ENSSSCG00000016057,ENSSSCG00000028326	CBLB|-|NRP2|PLK2|-|PLXNA2|C3AR1|STAT1|NR4A1|
GO:0060089	molecular transducer activity	molecular_function	0.17348	1	9	66	592	4727	ENSSSCG00000016057,ENSSSCG00000028326,ENSSSCG00000015621,ENSSSCG00000023868,ENSSSCG00000024996,ENSSSCG00000016925,ENSSSCG00000022486,ENSSSCG00000026412,ENSSSCG00000026383	STAT1|NR4A1|PLXNA2|C3AR1|-|PLK2|CBLB|-|NRP2|
GO:0009653	anatomical structure morphogenesis	biological_process	0.17353	1	9	66	424	4727	ENSSSCG00000026412,ENSSSCG00000026383,ENSSSCG00000015074,ENSSSCG00000006495,ENSSSCG00000026362,ENSSSCG00000023868,ENSSSCG00000001912,ENSSSCG00000001050,ENSSSCG00000010991	-|NRP2|SIDT2|SEMA4A|HES1|C3AR1|PML|EDN1|AQP3|
GO:0022625	cytosolic large ribosomal subunit	cellular_component	0.17361	1	1	66	21	4727	ENSSSCG00000024398	-|
GO:0048144	fibroblast proliferation	biological_process	0.17385	1	1	66	12	4727	ENSSSCG00000001912	PML|
GO:0048145	regulation of fibroblast proliferation	biological_process	0.17385	1	1	66	12	4727	ENSSSCG00000001912	PML|
GO:0042752	regulation of circadian rhythm	biological_process	0.17431	1	1	66	12	4727	ENSSSCG00000001912	PML|
GO:0043491	protein kinase B signaling cascade	biological_process	0.17452	1	1	66	12	4727	ENSSSCG00000005724	SETX|
GO:0007169	transmembrane receptor protein tyrosine kinase signaling pathway	biological_process	0.17477	1	3	66	94	4727	ENSSSCG00000024996,ENSSSCG00000005724,ENSSSCG00000026383	-|SETX|NRP2|
GO:0042310	vasoconstriction	biological_process	0.17505	1	1	66	13	4727	ENSSSCG00000001050	EDN1|
GO:0072522	purine-containing compound biosynthetic process	biological_process	0.17536	1	2	66	53	4727	ENSSSCG00000009882,ENSSSCG00000001050	OAS1|EDN1|
GO:0051219	phosphoprotein binding	molecular_function	0.17546	1	1	66	12	4727	ENSSSCG00000022486	CBLB|
GO:0051341	regulation of oxidoreductase activity	biological_process	0.17559	1	1	66	13	4727	ENSSSCG00000001050	EDN1|
GO:0006461	protein complex assembly	biological_process	0.17644	1	5	66	201	4727	ENSSSCG00000005724,ENSSSCG00000009882,ENSSSCG00000001912,ENSSSCG00000022916,ENSSSCG00000026362	SETX|OAS1|PML|EVL|HES1|
GO:0070271	protein complex biogenesis	biological_process	0.17644	1	5	66	201	4727	ENSSSCG00000022916,ENSSSCG00000001912,ENSSSCG00000005724,ENSSSCG00000009882,ENSSSCG00000026362	EVL|PML|SETX|OAS1|HES1|
GO:0032609	interferon-gamma production	biological_process	0.17731	1	1	66	13	4727	ENSSSCG00000027982	ISG15|
GO:0048524	positive regulation of viral process	biological_process	0.17765	1	1	66	13	4727	ENSSSCG00000010453	IFIT1|
GO:0030175	filopodium	cellular_component	0.17859	1	1	66	13	4727	ENSSSCG00000002538	DYNC1H1|
GO:0051293	establishment of spindle localization	biological_process	0.17894	1	1	66	12	4727	ENSSSCG00000002538	DYNC1H1|
GO:0050886	endocrine process	biological_process	0.17934	1	1	66	14	4727	ENSSSCG00000001050	EDN1|
GO:2000241	regulation of reproductive process	biological_process	0.17957	1	1	66	15	4727	ENSSSCG00000009997	OSM|
GO:0072527	pyrimidine-containing compound metabolic process	biological_process	0.1796	1	1	66	13	4727	ENSSSCG00000008647	CMPK2|
GO:0051093	negative regulation of developmental process	biological_process	0.17986	1	3	66	103	4727	ENSSSCG00000026362,ENSSSCG00000006495,ENSSSCG00000001912	HES1|SEMA4A|PML|
GO:0003677	DNA binding	molecular_function	0.18023	1	7	66	335	4727	ENSSSCG00000016057,ENSSSCG00000026362,ENSSSCG00000016520,ENSSSCG00000028326,ENSSSCG00000025716,ENSSSCG00000026336,ENSSSCG00000005724	STAT1|HES1|CREB3L2|NR4A1|-|-|SETX|
GO:0031252	cell leading edge	cellular_component	0.18026	1	2	66	48	4727	ENSSSCG00000010454,ENSSSCG00000022916	IFIT5|EVL|
GO:0001818	negative regulation of cytokine production	biological_process	0.18117	1	1	66	14	4727	ENSSSCG00000001912	PML|
GO:0008645	hexose transport	biological_process	0.18129	1	1	66	15	4727	ENSSSCG00000001050	EDN1|
GO:0015749	monosaccharide transport	biological_process	0.18129	1	1	66	15	4727	ENSSSCG00000001050	EDN1|
GO:0015758	glucose transport	biological_process	0.18129	1	1	66	15	4727	ENSSSCG00000001050	EDN1|
GO:0048015	phosphatidylinositol-mediated signaling	biological_process	0.18176	1	1	66	14	4727	ENSSSCG00000001050	EDN1|
GO:0048017	inositol lipid-mediated signaling	biological_process	0.18176	1	1	66	14	4727	ENSSSCG00000001050	EDN1|
GO:0002687	positive regulation of leukocyte migration	biological_process	0.18177	1	1	66	17	4727	ENSSSCG00000023868	C3AR1|
GO:0009306	protein secretion	biological_process	0.18306	1	2	66	51	4727	ENSSSCG00000001912,ENSSSCG00000008648	PML|RSAD2|
GO:0035051	cardiocyte differentiation	biological_process	0.18322	1	1	66	14	4727	ENSSSCG00000026362	HES1|
GO:0005811	lipid particle	cellular_component	0.18398	1	1	66	13	4727	ENSSSCG00000008648	RSAD2|
GO:0051128	regulation of cellular component organization	biological_process	0.18407	1	7	66	311	4727	ENSSSCG00000026412,ENSSSCG00000001912,ENSSSCG00000022916,ENSSSCG00000001050,ENSSSCG00000005724,ENSSSCG00000016925,ENSSSCG00000006495	-|PML|EVL|EDN1|SETX|PLK2|SEMA4A|
GO:0042490	mechanoreceptor differentiation	biological_process	0.18437	1	1	66	13	4727	ENSSSCG00000026362	HES1|
GO:0060113	inner ear receptor cell differentiation	biological_process	0.18437	1	1	66	13	4727	ENSSSCG00000026362	HES1|
GO:0032970	regulation of actin filament-based process	biological_process	0.18475	1	2	66	54	4727	ENSSSCG00000022916,ENSSSCG00000001050	EVL|EDN1|
GO:0042826	histone deacetylase binding	molecular_function	0.18488	1	1	66	14	4727	ENSSSCG00000026362	HES1|
GO:2000134	negative regulation of G1/S transition of mitotic cell cycle	biological_process	0.18489	1	1	66	12	4727	ENSSSCG00000001912	PML|
GO:0002062	chondrocyte differentiation	biological_process	0.18555	1	1	66	15	4727	ENSSSCG00000016520	CREB3L2|
GO:0060840	artery development	biological_process	0.18574	1	1	66	13	4727	ENSSSCG00000026362	HES1|
GO:0000902	cell morphogenesis	biological_process	0.18588	1	5	66	197	4727	ENSSSCG00000015074,ENSSSCG00000026362,ENSSSCG00000006495,ENSSSCG00000026412,ENSSSCG00000026383	SIDT2|HES1|SEMA4A|-|NRP2|
GO:0043410	positive regulation of MAPK cascade	biological_process	0.187	1	2	66	53	4727	ENSSSCG00000001050,ENSSSCG00000009997	EDN1|OSM|
GO:0050796	regulation of insulin secretion	biological_process	0.18719	1	1	66	15	4727	ENSSSCG00000015074	SIDT2|
GO:0004725	protein tyrosine phosphatase activity	molecular_function	0.18749	1	1	66	13	4727	ENSSSCG00000010831	DUSP10|
GO:0042770	signal transduction in response to DNA damage	biological_process	0.18758	1	1	66	13	4727	ENSSSCG00000001912	PML|
GO:0047485	protein N-terminus binding	molecular_function	0.18779	1	1	66	15	4727	ENSSSCG00000023304	SRRM2|
GO:1901987	regulation of cell cycle phase transition	biological_process	0.1878	1	2	66	52	4727	ENSSSCG00000016925,ENSSSCG00000001912	PLK2|PML|
GO:0006282	regulation of DNA repair	biological_process	0.18781	1	1	66	15	4727	ENSSSCG00000001912	PML|
GO:0042476	odontogenesis	biological_process	0.18844	1	1	66	15	4727	ENSSSCG00000010991	AQP3|
GO:0071621	granulocyte chemotaxis	biological_process	0.1885	1	1	66	15	4727	ENSSSCG00000023868	C3AR1|
GO:0051254	positive regulation of RNA metabolic process	biological_process	0.18855	1	5	66	208	4727	ENSSSCG00000016520,ENSSSCG00000026362,ENSSSCG00000028326,ENSSSCG00000005724,ENSSSCG00000009997	CREB3L2|HES1|NR4A1|SETX|OSM|
GO:0048520	positive regulation of behavior	biological_process	0.18873	1	1	66	17	4727	ENSSSCG00000023868	C3AR1|
GO:0050921	positive regulation of chemotaxis	biological_process	0.18873	1	1	66	17	4727	ENSSSCG00000023868	C3AR1|
GO:0050728	negative regulation of inflammatory response	biological_process	0.18947	1	1	66	15	4727	ENSSSCG00000010831	DUSP10|
GO:0002700	regulation of production of molecular mediator of immune response	biological_process	0.18996	1	1	66	15	4727	ENSSSCG00000008648	RSAD2|
GO:0015144	carbohydrate transmembrane transporter activity	molecular_function	0.19029	1	1	66	16	4727	ENSSSCG00000010991	AQP3|
GO:1901476	carbohydrate transporter activity	molecular_function	0.19029	1	1	66	16	4727	ENSSSCG00000010991	AQP3|
GO:0006984	ER-nucleus signaling pathway	biological_process	0.19042	1	1	66	14	4727	ENSSSCG00000016520	CREB3L2|
GO:0009792	embryo development ending in birth or egg hatching	biological_process	0.1906	1	3	66	105	4727	ENSSSCG00000026412,ENSSSCG00000001050,ENSSSCG00000026362	-|EDN1|HES1|
GO:0043009	chordate embryonic development	biological_process	0.1906	1	3	66	105	4727	ENSSSCG00000026362,ENSSSCG00000001050,ENSSSCG00000026412	HES1|EDN1|-|
GO:0006366	transcription from RNA polymerase II promoter	biological_process	0.19126	1	7	66	328	4727	ENSSSCG00000028326,ENSSSCG00000026362,ENSSSCG00000016520,ENSSSCG00000011951,ENSSSCG00000005724,ENSSSCG00000009997,ENSSSCG00000001050	NR4A1|HES1|CREB3L2|NFKBIZ|SETX|OSM|EDN1|
GO:0010522	regulation of calcium ion transport into cytosol	biological_process	0.19154	1	1	66	13	4727	ENSSSCG00000001912	PML|
GO:0006888	ER to Golgi vesicle-mediated transport	biological_process	0.19213	1	1	66	13	4727	ENSSSCG00000016520	CREB3L2|
GO:0001078	RNA polymerase II core promoter proximal region sequence-specific DNA binding transcription factor activity involved in negative regulation of transcription	molecular_function	0.19218	1	1	66	15	4727	ENSSSCG00000026362	HES1|
GO:0042102	positive regulation of T cell proliferation	biological_process	0.19229	1	1	66	14	4727	ENSSSCG00000026362	HES1|
GO:0043149	stress fiber assembly	biological_process	0.19244	1	1	66	14	4727	ENSSSCG00000022916	EVL|
GO:0042803	protein homodimerization activity	molecular_function	0.19246	1	3	66	103	4727	ENSSSCG00000001912,ENSSSCG00000026362,ENSSSCG00000028326	PML|HES1|NR4A1|
GO:0033002	muscle cell proliferation	biological_process	0.19253	1	1	66	15	4727	ENSSSCG00000001050	EDN1|
GO:0033554	cellular response to stress	biological_process	0.19266	1	6	66	255	4727	ENSSSCG00000016520,ENSSSCG00000013835,ENSSSCG00000010831,ENSSSCG00000005724,ENSSSCG00000001050,ENSSSCG00000001912	CREB3L2|CASP14|DUSP10|SETX|EDN1|PML|
GO:0051653	spindle localization	biological_process	0.19347	1	1	66	13	4727	ENSSSCG00000002538	DYNC1H1|
GO:0002230	positive regulation of defense response to virus by host	biological_process	0.19369	1	1	66	13	4727	ENSSSCG00000001912	PML|
GO:0051053	negative regulation of DNA metabolic process	biological_process	0.19423	1	1	66	15	4727	ENSSSCG00000001912	PML|
GO:0033043	regulation of organelle organization	biological_process	0.19427	1	4	66	153	4727	ENSSSCG00000016925,ENSSSCG00000001912,ENSSSCG00000022916,ENSSSCG00000001050	PLK2|PML|EVL|EDN1|
GO:0050778	positive regulation of immune response	biological_process	0.19444	1	2	66	59	4727	ENSSSCG00000008648,ENSSSCG00000024996	RSAD2|-|
GO:0007569	cell aging	biological_process	0.1945	1	1	66	14	4727	ENSSSCG00000001912	PML|
GO:0043244	regulation of protein complex disassembly	biological_process	0.19457	1	1	66	13	4727	ENSSSCG00000005724	SETX|
GO:0009142	nucleoside triphosphate biosynthetic process	biological_process	0.19539	1	1	66	17	4727	ENSSSCG00000008647	CMPK2|
GO:0035335	peptidyl-tyrosine dephosphorylation	biological_process	0.19563	1	1	66	14	4727	ENSSSCG00000010831	DUSP10|
GO:0071407	cellular response to organic cyclic compound	biological_process	0.19662	1	2	66	54	4727	ENSSSCG00000028326,ENSSSCG00000010453	NR4A1|IFIT1|
GO:0032270	positive regulation of cellular protein metabolic process	biological_process	0.19681	1	4	66	151	4727	ENSSSCG00000026362,ENSSSCG00000009997,ENSSSCG00000001050,ENSSSCG00000001912	HES1|OSM|EDN1|PML|
GO:0030036	actin cytoskeleton organization	biological_process	0.1973	1	3	66	100	4727	ENSSSCG00000022916,ENSSSCG00000001050,ENSSSCG00000027580	EVL|EDN1|-|
GO:0021575	hindbrain morphogenesis	biological_process	0.19862	1	1	66	14	4727	ENSSSCG00000026362	HES1|
GO:0060711	labyrinthine layer development	biological_process	0.19985	1	1	66	15	4727	ENSSSCG00000026362	HES1|
GO:0016607	nuclear speck	cellular_component	0.20006	1	1	66	16	4727	ENSSSCG00000023304	SRRM2|
GO:0010594	regulation of endothelial cell migration	biological_process	0.20016	1	1	66	14	4727	ENSSSCG00000006495	SEMA4A|
GO:0001756	somitogenesis	biological_process	0.20049	1	1	66	16	4727	ENSSSCG00000026412	-|
GO:0060548	negative regulation of cell death	biological_process	0.20051	1	3	66	105	4727	ENSSSCG00000010452,ENSSSCG00000005724,ENSSSCG00000016925	IFIT3|SETX|PLK2|
GO:0015934	large ribosomal subunit	cellular_component	0.20086	1	1	66	24	4727	ENSSSCG00000024398	-|
GO:0009411	response to UV	biological_process	0.20129	1	1	66	14	4727	ENSSSCG00000001912	PML|
GO:0000723	telomere maintenance	biological_process	0.20136	1	1	66	15	4727	ENSSSCG00000001912	PML|
GO:0032200	telomere organization	biological_process	0.20136	1	1	66	15	4727	ENSSSCG00000001912	PML|
GO:0030856	regulation of epithelial cell differentiation	biological_process	0.2022	1	1	66	15	4727	ENSSSCG00000026362	HES1|
GO:0065003	macromolecular complex assembly	biological_process	0.20248	1	6	66	276	4727	ENSSSCG00000002538,ENSSSCG00000026362,ENSSSCG00000005724,ENSSSCG00000009882,ENSSSCG00000022916,ENSSSCG00000001912	DYNC1H1|HES1|SETX|OAS1|EVL|PML|
GO:0045995	regulation of embryonic development	biological_process	0.20299	1	1	66	16	4727	ENSSSCG00000026362	HES1|
GO:0009408	response to heat	biological_process	0.20351	1	1	66	16	4727	ENSSSCG00000009997	OSM|
GO:2001252	positive regulation of chromosome organization	biological_process	0.20386	1	1	66	16	4727	ENSSSCG00000001912	PML|
GO:0034968	histone lysine methylation	biological_process	0.20497	1	1	66	14	4727	ENSSSCG00000009806	SETD1B|
GO:0042129	regulation of T cell proliferation	biological_process	0.2057	1	1	66	15	4727	ENSSSCG00000026362	HES1|
GO:0060401	cytosolic calcium ion transport	biological_process	0.20585	1	1	66	14	4727	ENSSSCG00000001912	PML|
GO:0060402	calcium ion transport into cytosol	biological_process	0.20585	1	1	66	14	4727	ENSSSCG00000001912	PML|
GO:0003073	regulation of systemic arterial blood pressure	biological_process	0.20588	1	1	66	16	4727	ENSSSCG00000001050	EDN1|
GO:0048729	tissue morphogenesis	biological_process	0.20595	1	3	66	105	4727	ENSSSCG00000001912,ENSSSCG00000001050,ENSSSCG00000026362	PML|EDN1|HES1|
GO:0048285	organelle fission	biological_process	0.20634	1	2	66	59	4727	ENSSSCG00000021725,ENSSSCG00000001050	PDS5B|EDN1|
GO:0043484	regulation of RNA splicing	biological_process	0.20675	1	1	66	16	4727	ENSSSCG00000005724	SETX|
GO:0012505	endomembrane system	cellular_component	0.20686	1	5	66	208	4727	ENSSSCG00000008648,ENSSSCG00000001912,ENSSSCG00000028326,ENSSSCG00000012077,ENSSSCG00000012076	RSAD2|PML|NR4A1|MX1|MX2|
GO:0044708	single-organism behavior	biological_process	0.2079	1	2	66	56	4727	ENSSSCG00000016925,ENSSSCG00000009997	PLK2|OSM|
GO:1902115	regulation of organelle assembly	biological_process	0.2084	1	1	66	15	4727	ENSSSCG00000001050	EDN1|
GO:0046982	protein heterodimerization activity	molecular_function	0.20946	1	2	66	65	4727	ENSSSCG00000001912,ENSSSCG00000028326	PML|NR4A1|
GO:0000302	response to reactive oxygen species	biological_process	0.20947	1	1	66	15	4727	ENSSSCG00000005724	SETX|
GO:0002703	regulation of leukocyte mediated immunity	biological_process	0.20989	1	1	66	16	4727	ENSSSCG00000008648	RSAD2|
GO:0000981	sequence-specific DNA binding RNA polymerase II transcription factor activity	molecular_function	0.21037	1	3	66	115	4727	ENSSSCG00000016520,ENSSSCG00000026362,ENSSSCG00000028326	CREB3L2|HES1|NR4A1|
GO:1901566	organonitrogen compound biosynthetic process	biological_process	0.21088	1	3	66	109	4727	ENSSSCG00000001050,ENSSSCG00000009882,ENSSSCG00000008647	EDN1|OAS1|CMPK2|
GO:0051701	interaction with host	biological_process	0.211	1	1	66	16	4727	ENSSSCG00000010453	IFIT1|
GO:0051246	regulation of protein metabolic process	biological_process	0.21137	1	6	66	268	4727	ENSSSCG00000001912,ENSSSCG00000001050,ENSSSCG00000009997,ENSSSCG00000010831,ENSSSCG00000026362,ENSSSCG00000027982	PML|EDN1|OSM|DUSP10|HES1|ISG15|
GO:0060429	epithelium development	biological_process	0.21147	1	4	66	159	4727	ENSSSCG00000001912,ENSSSCG00000001050,ENSSSCG00000026362,ENSSSCG00000015074	PML|EDN1|HES1|SIDT2|
GO:0019827	stem cell maintenance	biological_process	0.21188	1	1	66	17	4727	ENSSSCG00000026362	HES1|
GO:0005643	nuclear pore	cellular_component	0.212	1	1	66	16	4727	ENSSSCG00000012076	MX2|
GO:0003013	circulatory system process	biological_process	0.21213	1	2	66	61	4727	ENSSSCG00000006289,ENSSSCG00000001050	F5|EDN1|
GO:0008015	blood circulation	biological_process	0.21213	1	2	66	61	4727	ENSSSCG00000006289,ENSSSCG00000001050	F5|EDN1|
GO:0008543	fibroblast growth factor receptor signaling pathway	biological_process	0.21236	1	1	66	16	4727	ENSSSCG00000005724	SETX|
GO:0044344	cellular response to fibroblast growth factor stimulus	biological_process	0.21236	1	1	66	16	4727	ENSSSCG00000005724	SETX|
GO:0071774	response to fibroblast growth factor stimulus	biological_process	0.21236	1	1	66	16	4727	ENSSSCG00000005724	SETX|
GO:0050657	nucleic acid transport	biological_process	0.21318	1	1	66	15	4727	ENSSSCG00000015074	SIDT2|
GO:0050658	RNA transport	biological_process	0.21318	1	1	66	15	4727	ENSSSCG00000015074	SIDT2|
GO:0051236	establishment of RNA localization	biological_process	0.21318	1	1	66	15	4727	ENSSSCG00000015074	SIDT2|
GO:0003824	catalytic activity	molecular_function	0.21335	1	23	66	1302	4727	ENSSSCG00000015525,ENSSSCG00000017146,ENSSSCG00000026443,ENSSSCG00000029531,ENSSSCG00000008647,ENSSSCG00000012076,ENSSSCG00000008648,ENSSSCG00000021712,ENSSSCG00000022486,ENSSSCG00000017148,ENSSSCG00000010831,ENSSSCG00000016925,ENSSSCG00000015071,ENSSSCG00000026336,ENSSSCG00000009882,ENSSSCG00000030548,ENSSSCG00000009806,ENSSSCG00000022912,ENSSSCG00000013835,ENSSSCG00000002538,ENSSSCG00000026383,…	TOR3A|RNF213|-|-|CMPK2|MX2|RSAD2|HERC6|CBLB|-|DUSP10|PLK2|SIK3|-|OAS1|HERC5|SETD1B|NT5C3A|CASP14|DYNC1H1|NRP2|-|MX1|
GO:0001934	positive regulation of protein phosphorylation	biological_process	0.21407	1	3	66	104	4727	ENSSSCG00000026362,ENSSSCG00000001050,ENSSSCG00000009997	HES1|EDN1|OSM|
GO:0003279	cardiac septum development	biological_process	0.21524	1	1	66	15	4727	ENSSSCG00000026362	HES1|
GO:0002027	regulation of heart rate	biological_process	0.21532	1	1	66	17	4727	ENSSSCG00000001050	EDN1|
GO:0004672	protein kinase activity	molecular_function	0.21623	1	4	66	156	4727	ENSSSCG00000026383,ENSSSCG00000016925,ENSSSCG00000024996,ENSSSCG00000015071	NRP2|PLK2|-|SIK3|
GO:0051153	regulation of striated muscle cell differentiation	biological_process	0.21668	1	1	66	19	4727	ENSSSCG00000001050	EDN1|
GO:0032386	regulation of intracellular transport	biological_process	0.21727	1	2	66	57	4727	ENSSSCG00000001912,ENSSSCG00000012076	PML|MX2|
GO:0010563	negative regulation of phosphorus metabolic process	biological_process	0.21742	1	2	66	60	4727	ENSSSCG00000001050,ENSSSCG00000010831	EDN1|DUSP10|
GO:0045936	negative regulation of phosphate metabolic process	biological_process	0.21742	1	2	66	60	4727	ENSSSCG00000010831,ENSSSCG00000001050	DUSP10|EDN1|
GO:0035914	skeletal muscle cell differentiation	biological_process	0.21828	1	1	66	19	4727	ENSSSCG00000028326	NR4A1|
GO:0006886	intracellular protein transport	biological_process	0.21848	1	4	66	161	4727	ENSSSCG00000026362,ENSSSCG00000001912,ENSSSCG00000025932,ENSSSCG00000010453	HES1|PML|AP1S3|IFIT1|
GO:0032946	positive regulation of mononuclear cell proliferation	biological_process	0.21939	1	1	66	16	4727	ENSSSCG00000026362	HES1|
GO:0050671	positive regulation of lymphocyte proliferation	biological_process	0.21939	1	1	66	16	4727	ENSSSCG00000026362	HES1|
GO:0070665	positive regulation of leukocyte proliferation	biological_process	0.21939	1	1	66	16	4727	ENSSSCG00000026362	HES1|
GO:0033135	regulation of peptidyl-serine phosphorylation	biological_process	0.21999	1	1	66	17	4727	ENSSSCG00000009997	OSM|
GO:0001775	cell activation	biological_process	0.22049	1	3	66	112	4727	ENSSSCG00000006495,ENSSSCG00000026362,ENSSSCG00000008648	SEMA4A|HES1|RSAD2|
GO:0030427	site of polarized growth	cellular_component	0.22123	1	1	66	16	4727	ENSSSCG00000005724	SETX|
GO:0072073	kidney epithelium development	biological_process	0.22191	1	1	66	17	4727	ENSSSCG00000026362	HES1|
GO:0060491	regulation of cell projection assembly	biological_process	0.22219	1	1	66	16	4727	ENSSSCG00000022916	EVL|
GO:0006885	regulation of pH	biological_process	0.22252	1	1	66	16	4727	ENSSSCG00000001050	EDN1|
GO:0010628	positive regulation of gene expression	biological_process	0.22289	1	5	66	222	4727	ENSSSCG00000016520,ENSSSCG00000026362,ENSSSCG00000028326,ENSSSCG00000009997,ENSSSCG00000005724	CREB3L2|HES1|NR4A1|OSM|SETX|
GO:0030838	positive regulation of actin filament polymerization	biological_process	0.22323	1	1	66	17	4727	ENSSSCG00000022916	EVL|
GO:0042327	positive regulation of phosphorylation	biological_process	0.22325	1	3	66	106	4727	ENSSSCG00000001050,ENSSSCG00000009997,ENSSSCG00000026362	EDN1|OSM|HES1|
GO:0009953	dorsal/ventral pattern formation	biological_process	0.22434	1	1	66	18	4727	ENSSSCG00000001050	EDN1|
GO:0030073	insulin secretion	biological_process	0.22461	1	1	66	18	4727	ENSSSCG00000015074	SIDT2|
GO:0003777	microtubule motor activity	molecular_function	0.22483	1	1	66	15	4727	ENSSSCG00000002538	DYNC1H1|
GO:0030879	mammary gland development	biological_process	0.22677	1	1	66	17	4727	ENSSSCG00000001912	PML|
GO:0043902	positive regulation of multi-organism process	biological_process	0.22677	1	1	66	17	4727	ENSSSCG00000010453	IFIT1|
GO:0030029	actin filament-based process	biological_process	0.2268	1	3	66	108	4727	ENSSSCG00000027580,ENSSSCG00000001050,ENSSSCG00000022916	-|EDN1|EVL|
GO:0072006	nephron development	biological_process	0.22749	1	1	66	18	4727	ENSSSCG00000026362	HES1|
GO:0008104	protein localization	biological_process	0.22756	1	7	66	332	4727	ENSSSCG00000025932,ENSSSCG00000001912,ENSSSCG00000008648,ENSSSCG00000010453,ENSSSCG00000003797,ENSSSCG00000002538,ENSSSCG00000026362	AP1S3|PML|RSAD2|IFIT1|DIRAS3|DYNC1H1|HES1|
GO:0051817	modification of morphology or physiology of other organism involved in symbiotic interaction	biological_process	0.22768	1	1	66	18	4727	ENSSSCG00000010453	IFIT1|
GO:0043254	regulation of protein complex assembly	biological_process	0.22844	1	2	66	60	4727	ENSSSCG00000005724,ENSSSCG00000022916	SETX|EVL|
GO:0008276	protein methyltransferase activity	molecular_function	0.23036	1	1	66	16	4727	ENSSSCG00000009806	SETD1B|
GO:0021987	cerebral cortex development	biological_process	0.23043	1	1	66	16	4727	ENSSSCG00000026383	NRP2|
GO:0033036	macromolecule localization	biological_process	0.23071	1	8	66	390	4727	ENSSSCG00000008648,ENSSSCG00000010453,ENSSSCG00000025932,ENSSSCG00000003797,ENSSSCG00000001912,ENSSSCG00000002538,ENSSSCG00000026362,ENSSSCG00000015074	RSAD2|IFIT1|AP1S3|DIRAS3|PML|DYNC1H1|HES1|SIDT2|
GO:0004713	protein tyrosine kinase activity	molecular_function	0.23134	1	3	66	105	4727	ENSSSCG00000026383,ENSSSCG00000016925,ENSSSCG00000015071	NRP2|PLK2|SIK3|
GO:0007015	actin filament organization	biological_process	0.23152	1	2	66	61	4727	ENSSSCG00000027580,ENSSSCG00000022916	-|EVL|
GO:0051234	establishment of localization	biological_process	0.23255	1	15	66	829	4727	ENSSSCG00000008648,ENSSSCG00000010453,ENSSSCG00000025932,ENSSSCG00000016520,ENSSSCG00000012077,ENSSSCG00000003797,ENSSSCG00000010991,ENSSSCG00000009997,ENSSSCG00000001050,ENSSSCG00000001912,ENSSSCG00000026552,ENSSSCG00000026362,ENSSSCG00000002538,ENSSSCG00000012076,ENSSSCG00000015074	RSAD2|IFIT1|AP1S3|CREB3L2|MX1|DIRAS3|AQP3|OSM|EDN1|PML|HIATL1|HES1|DYNC1H1|MX2|SIDT2|
GO:0042098	T cell proliferation	biological_process	0.23329	1	1	66	17	4727	ENSSSCG00000026362	HES1|
GO:2000736	regulation of stem cell differentiation	biological_process	0.23353	1	1	66	20	4727	ENSSSCG00000026362	HES1|
GO:0044770	cell cycle phase transition	biological_process	0.23363	1	2	66	61	4727	ENSSSCG00000016925,ENSSSCG00000001912	PLK2|PML|
GO:0009755	hormone-mediated signaling pathway	biological_process	0.23411	1	1	66	17	4727	ENSSSCG00000028326	NR4A1|
GO:0048645	organ formation	biological_process	0.23508	1	1	66	19	4727	ENSSSCG00000026362	HES1|
GO:0005102	receptor binding	molecular_function	0.23521	1	5	66	234	4727	ENSSSCG00000009542,ENSSSCG00000001050,ENSSSCG00000009997,ENSSSCG00000001341,ENSSSCG00000006495	TNFSF13B|EDN1|OSM|SLA-11|SEMA4A|
GO:0051338	regulation of transferase activity	biological_process	0.23569	1	3	66	113	4727	ENSSSCG00000010831,ENSSSCG00000001912,ENSSSCG00000001050	DUSP10|PML|EDN1|
GO:0018108	peptidyl-tyrosine phosphorylation	biological_process	0.23628	1	2	66	60	4727	ENSSSCG00000026362,ENSSSCG00000009997	HES1|OSM|
GO:0018212	peptidyl-tyrosine modification	biological_process	0.23628	1	2	66	60	4727	ENSSSCG00000026362,ENSSSCG00000009997	HES1|OSM|
GO:0007179	transforming growth factor beta receptor signaling pathway	biological_process	0.23667	1	1	66	17	4727	ENSSSCG00000001912	PML|
GO:0051247	positive regulation of protein metabolic process	biological_process	0.23716	1	4	66	165	4727	ENSSSCG00000009997,ENSSSCG00000001912,ENSSSCG00000001050,ENSSSCG00000026362	OSM|PML|EDN1|HES1|
GO:0032944	regulation of mononuclear cell proliferation	biological_process	0.23877	1	1	66	18	4727	ENSSSCG00000026362	HES1|
GO:0050670	regulation of lymphocyte proliferation	biological_process	0.23877	1	1	66	18	4727	ENSSSCG00000026362	HES1|
GO:0070663	regulation of leukocyte proliferation	biological_process	0.23877	1	1	66	18	4727	ENSSSCG00000026362	HES1|
GO:0007088	regulation of mitosis	biological_process	0.23883	1	1	66	18	4727	ENSSSCG00000001050	EDN1|
GO:0051783	regulation of nuclear division	biological_process	0.23883	1	1	66	18	4727	ENSSSCG00000001050	EDN1|
GO:0022612	gland morphogenesis	biological_process	0.23956	1	1	66	17	4727	ENSSSCG00000001912	PML|
GO:0007050	cell cycle arrest	biological_process	0.23968	1	1	66	19	4727	ENSSSCG00000001912	PML|
GO:0005516	calmodulin binding	molecular_function	0.23982	1	1	66	17	4727	ENSSSCG00000024996	-|
GO:0043123	positive regulation of I-kappaB kinase/NF-kappaB cascade	biological_process	0.24	1	1	66	19	4727	ENSSSCG00000016925	PLK2|
GO:0016311	dephosphorylation	biological_process	0.24023	1	2	66	61	4727	ENSSSCG00000010831,ENSSSCG00000022912	DUSP10|NT5C3A|
GO:0000077	DNA damage checkpoint	biological_process	0.24061	1	1	66	16	4727	ENSSSCG00000001912	PML|
GO:0001701	in utero embryonic development	biological_process	0.24082	1	2	66	63	4727	ENSSSCG00000026362,ENSSSCG00000001050	HES1|EDN1|
GO:0006939	smooth muscle contraction	biological_process	0.24116	1	1	66	19	4727	ENSSSCG00000001050	EDN1|
GO:0035282	segmentation	biological_process	0.24143	1	1	66	20	4727	ENSSSCG00000026412	-|
GO:0044212	transcription regulatory region DNA binding	molecular_function	0.24161	1	3	66	121	4727	ENSSSCG00000016520,ENSSSCG00000026362,ENSSSCG00000005724	CREB3L2|HES1|SETX|
GO:0010212	response to ionizing radiation	biological_process	0.24163	1	1	66	18	4727	ENSSSCG00000001912	PML|
GO:0043542	endothelial cell migration	biological_process	0.24202	1	1	66	18	4727	ENSSSCG00000006495	SEMA4A|
GO:0048471	perinuclear region of cytoplasm	cellular_component	0.24207	1	2	66	60	4727	ENSSSCG00000009542,ENSSSCG00000012077	TNFSF13B|MX1|
GO:0050821	protein stabilization	biological_process	0.24471	1	1	66	20	4727	ENSSSCG00000001912	PML|
GO:0008565	protein transporter activity	molecular_function	0.24525	1	1	66	18	4727	ENSSSCG00000025932	AP1S3|
GO:0016779	nucleotidyltransferase activity	molecular_function	0.24582	1	1	66	18	4727	ENSSSCG00000009882	OAS1|
GO:0001657	ureteric bud development	biological_process	0.24657	1	1	66	18	4727	ENSSSCG00000026362	HES1|
GO:0002699	positive regulation of immune effector process	biological_process	0.24718	1	1	66	20	4727	ENSSSCG00000008648	RSAD2|
GO:0048469	cell maturation	biological_process	0.24719	1	1	66	21	4727	ENSSSCG00000026362	HES1|
GO:0030010	establishment of cell polarity	biological_process	0.24734	1	1	66	18	4727	ENSSSCG00000026362	HES1|
GO:0043112	receptor metabolic process	biological_process	0.2481	1	1	66	19	4727	ENSSSCG00000001050	EDN1|
GO:0030817	regulation of cAMP biosynthetic process	biological_process	0.24857	1	1	66	21	4727	ENSSSCG00000001050	EDN1|
GO:0034654	nucleobase-containing compound biosynthetic process	biological_process	0.24972	1	11	66	614	4727	ENSSSCG00000028326,ENSSSCG00000008647,ENSSSCG00000026362,ENSSSCG00000016057,ENSSSCG00000009997,ENSSSCG00000005724,ENSSSCG00000011951,ENSSSCG00000009882,ENSSSCG00000001050,ENSSSCG00000001912,ENSSSCG00000016520	NR4A1|CMPK2|HES1|STAT1|OSM|SETX|NFKBIZ|OAS1|EDN1|PML|CREB3L2|
GO:0035821	modification of morphology or physiology of other organism	biological_process	0.25012	1	1	66	20	4727	ENSSSCG00000010453	IFIT1|
GO:0007052	mitotic spindle organization	biological_process	0.25064	1	1	66	19	4727	ENSSSCG00000016925	PLK2|
GO:0002791	regulation of peptide secretion	biological_process	0.25095	1	1	66	21	4727	ENSSSCG00000015074	SIDT2|
GO:0090087	regulation of peptide transport	biological_process	0.25095	1	1	66	21	4727	ENSSSCG00000015074	SIDT2|
GO:0090276	regulation of peptide hormone secretion	biological_process	0.25095	1	1	66	21	4727	ENSSSCG00000015074	SIDT2|
GO:0003924	GTPase activity	molecular_function	0.25188	1	2	66	66	4727	ENSSSCG00000012077,ENSSSCG00000012076	MX1|MX2|
GO:0071222	cellular response to lipopolysaccharide	biological_process	0.25216	1	1	66	18	4727	ENSSSCG00000008647	CMPK2|
GO:1901699	cellular response to nitrogen compound	biological_process	0.2525	1	2	66	64	4727	ENSSSCG00000028326,ENSSSCG00000010453	NR4A1|IFIT1|
GO:0046930	pore complex	cellular_component	0.25276	1	1	66	19	4727	ENSSSCG00000012076	MX2|
GO:0004197	cysteine-type endopeptidase activity	molecular_function	0.25283	1	1	66	19	4727	ENSSSCG00000013835	CASP14|
GO:0000070	mitotic sister chromatid segregation	biological_process	0.25284	1	1	66	20	4727	ENSSSCG00000021725	PDS5B|
GO:0044087	regulation of cellular component biogenesis	biological_process	0.25415	1	3	66	115	4727	ENSSSCG00000005724,ENSSSCG00000001050,ENSSSCG00000022916	SETX|EDN1|EVL|
GO:0016571	histone methylation	biological_process	0.25417	1	1	66	18	4727	ENSSSCG00000009806	SETD1B|
GO:0032273	positive regulation of protein polymerization	biological_process	0.25432	1	1	66	20	4727	ENSSSCG00000022916	EVL|
GO:0009628	response to abiotic stimulus	biological_process	0.2544	1	3	66	116	4727	ENSSSCG00000001050,ENSSSCG00000001912,ENSSSCG00000009997	EDN1|PML|OSM|
GO:0006163	purine nucleotide metabolic process	biological_process	0.25668	1	4	66	170	4727	ENSSSCG00000009882,ENSSSCG00000001050,ENSSSCG00000005738,ENSSSCG00000029531	OAS1|EDN1|RALGDS|-|
GO:0019899	enzyme binding	molecular_function	0.25673	1	5	66	225	4727	ENSSSCG00000001912,ENSSSCG00000027219,ENSSSCG00000024996,ENSSSCG00000026362,ENSSSCG00000000623	PML|AKAP7|-|HES1|BCL2L14|
GO:0045766	positive regulation of angiogenesis	biological_process	0.25692	1	1	66	19	4727	ENSSSCG00000023868	C3AR1|
GO:0071900	regulation of protein serine/threonine kinase activity	biological_process	0.2571	1	2	66	65	4727	ENSSSCG00000010831,ENSSSCG00000001050	DUSP10|EDN1|
GO:0021543	pallium development	biological_process	0.25746	1	1	66	18	4727	ENSSSCG00000026383	NRP2|
GO:0009266	response to temperature stimulus	biological_process	0.25758	1	1	66	21	4727	ENSSSCG00000009997	OSM|
GO:0016787	hydrolase activity	molecular_function	0.25809	1	11	66	586	4727	ENSSSCG00000010831,ENSSSCG00000017148,ENSSSCG00000012077,ENSSSCG00000026336,ENSSSCG00000015525,ENSSSCG00000017146,ENSSSCG00000022912,ENSSSCG00000013835,ENSSSCG00000002538,ENSSSCG00000012076,ENSSSCG00000029531	DUSP10|-|MX1|-|TOR3A|RNF213|NT5C3A|CASP14|DYNC1H1|MX2|-|
GO:0001501	skeletal system development	biological_process	0.25833	1	2	66	71	4727	ENSSSCG00000016520,ENSSSCG00000001050	CREB3L2|EDN1|
GO:0031253	cell projection membrane	cellular_component	0.25837	1	1	66	19	4727	ENSSSCG00000010454	IFIT5|
GO:0008170	N-methyltransferase activity	molecular_function	0.26015	1	1	66	19	4727	ENSSSCG00000009806	SETD1B|
GO:0001764	neuron migration	biological_process	0.26017	1	1	66	20	4727	ENSSSCG00000026383	NRP2|
GO:0044446	intracellular organelle part	cellular_component	0.26061	1	19	66	1111	4727	ENSSSCG00000009806,ENSSSCG00000002538,ENSSSCG00000024398,ENSSSCG00000016520,ENSSSCG00000012077,ENSSSCG00000001912,ENSSSCG00000015525,ENSSSCG00000005724,ENSSSCG00000015074,ENSSSCG00000026362,ENSSSCG00000012076,ENSSSCG00000028326,ENSSSCG00000008647,ENSSSCG00000023304,ENSSSCG00000008648,ENSSSCG00000022486,ENSSSCG00000021725,ENSSSCG00000010831,ENSSSCG00000016925	SETD1B|DYNC1H1|-|CREB3L2|MX1|PML|TOR3A|SETX|SIDT2|HES1|MX2|NR4A1|CMPK2|SRRM2|RSAD2|CBLB|PDS5B|DUSP10|PLK2|
GO:0002285	lymphocyte activation involved in immune response	biological_process	0.26111	1	1	66	21	4727	ENSSSCG00000006495	SEMA4A|
GO:0051147	regulation of muscle cell differentiation	biological_process	0.26131	1	1	66	23	4727	ENSSSCG00000001050	EDN1|
GO:0043241	protein complex disassembly	biological_process	0.26138	1	1	66	18	4727	ENSSSCG00000005724	SETX|
GO:0006974	response to DNA damage stimulus	biological_process	0.26171	1	3	66	118	4727	ENSSSCG00000013835,ENSSSCG00000001912,ENSSSCG00000005724	CASP14|PML|SETX|
GO:0016323	basolateral plasma membrane	cellular_component	0.26175	1	1	66	19	4727	ENSSSCG00000010991	AQP3|
GO:0045935	positive regulation of nucleobase-containing compound metabolic process	biological_process	0.26283	1	5	66	238	4727	ENSSSCG00000028326,ENSSSCG00000016520,ENSSSCG00000026362,ENSSSCG00000005724,ENSSSCG00000009997	NR4A1|CREB3L2|HES1|SETX|OSM|
GO:0006403	RNA localization	biological_process	0.26391	1	1	66	19	4727	ENSSSCG00000015074	SIDT2|
GO:0046907	intracellular transport	biological_process	0.26391	1	6	66	287	4727	ENSSSCG00000025932,ENSSSCG00000001912,ENSSSCG00000010453,ENSSSCG00000016520,ENSSSCG00000026362,ENSSSCG00000012076	AP1S3|PML|IFIT1|CREB3L2|HES1|MX2|
GO:0030510	regulation of BMP signaling pathway	biological_process	0.26413	1	1	66	21	4727	ENSSSCG00000026362	HES1|
GO:0031570	DNA integrity checkpoint	biological_process	0.26432	1	1	66	18	4727	ENSSSCG00000001912	PML|
GO:0008528	G-protein coupled peptide receptor activity	molecular_function	0.26444	1	1	66	24	4727	ENSSSCG00000023868	C3AR1|
GO:0046488	phosphatidylinositol metabolic process	biological_process	0.26483	1	1	66	21	4727	ENSSSCG00000026443	-|
GO:0000819	sister chromatid segregation	biological_process	0.266	1	1	66	21	4727	ENSSSCG00000021725	PDS5B|
GO:0007568	aging	biological_process	0.26759	1	1	66	20	4727	ENSSSCG00000001912	PML|
GO:0019438	aromatic compound biosynthetic process	biological_process	0.26777	1	11	66	623	4727	ENSSSCG00000001050,ENSSSCG00000001912,ENSSSCG00000009997,ENSSSCG00000005724,ENSSSCG00000009882,ENSSSCG00000011951,ENSSSCG00000016057,ENSSSCG00000026362,ENSSSCG00000028326,ENSSSCG00000008647,ENSSSCG00000016520	EDN1|PML|OSM|SETX|OAS1|NFKBIZ|STAT1|HES1|NR4A1|CMPK2|CREB3L2|
GO:0001656	metanephros development	biological_process	0.26777	1	1	66	21	4727	ENSSSCG00000026362	HES1|
GO:0048858	cell projection morphogenesis	biological_process	0.26778	1	3	66	116	4727	ENSSSCG00000026383,ENSSSCG00000026412,ENSSSCG00000006495	NRP2|-|SEMA4A|
GO:0016740	transferase activity	molecular_function	0.26822	1	8	66	410	4727	ENSSSCG00000009882,ENSSSCG00000026443,ENSSSCG00000009806,ENSSSCG00000008647,ENSSSCG00000026383,ENSSSCG00000024996,ENSSSCG00000016925,ENSSSCG00000015071	OAS1|-|SETD1B|CMPK2|NRP2|-|PLK2|SIK3|
GO:0031056	regulation of histone modification	biological_process	0.2684	1	1	66	21	4727	ENSSSCG00000001912	PML|
GO:0006997	nucleus organization	biological_process	0.26932	1	1	66	21	4727	ENSSSCG00000001912	PML|
GO:0031503	protein complex localization	biological_process	0.26952	1	1	66	21	4727	ENSSSCG00000002538	DYNC1H1|
GO:0042787	protein ubiquitination involved in ubiquitin-dependent protein catabolic process	biological_process	0.27094	1	1	66	19	4727	ENSSSCG00000001912	PML|
GO:0001653	peptide receptor activity	molecular_function	0.27103	1	1	66	25	4727	ENSSSCG00000023868	C3AR1|
GO:0032984	macromolecular complex disassembly	biological_process	0.27209	1	1	66	19	4727	ENSSSCG00000005724	SETX|
GO:0004714	transmembrane receptor protein tyrosine kinase activity	molecular_function	0.27275	1	1	66	20	4727	ENSSSCG00000026383	NRP2|
GO:0008150	biological_process	biological_process	0.27284	1	55	66	3763	4727	ENSSSCG00000017146,ENSSSCG00000023868,ENSSSCG00000001912,ENSSSCG00000026362,ENSSSCG00000012076,ENSSSCG00000008647,ENSSSCG00000015074,ENSSSCG00000022486,ENSSSCG00000026412,ENSSSCG00000015071,ENSSSCG00000027982,ENSSSCG00000010831,ENSSSCG00000006289,ENSSSCG00000005738,ENSSSCG00000026552,ENSSSCG00000022912,ENSSSCG00000002538,ENSSSCG00000009806,ENSSSCG00000030548,ENSSSCG00000010451,ENSSSCG00000024398,…	RNF213|C3AR1|PML|HES1|MX2|CMPK2|SIDT2|CBLB|-|SIK3|ISG15|DUSP10|F5|RALGDS|HIATL1|NT5C3A|DYNC1H1|SETD1B|HERC5|IFIT2|-|NRP2|TNFSF13B|CREB3L2|-|DIRAS3|OSM|SETX|NFKBIZ|EVL|BCL2L14|STAT1|NR4A1|-|-|RSAD2|HERC6|AP1S3|-|PLK2|PDS5B|IFIT3|AQP3|PLXNA2|OAS1|EDN1|RBM47|-|SEMA4A|CASP14|IFIT5|SLA-11|IFIT1|KIAA0232|MX1|
GO:0002685	regulation of leukocyte migration	biological_process	0.27294	1	1	66	24	4727	ENSSSCG00000023868	C3AR1|
GO:0048568	embryonic organ development	biological_process	0.27309	1	2	66	72	4727	ENSSSCG00000001050,ENSSSCG00000026362	EDN1|HES1|
GO:0006171	cAMP biosynthetic process	biological_process	0.27338	1	1	66	23	4727	ENSSSCG00000001050	EDN1|
GO:2000045	regulation of G1/S transition of mitotic cell cycle	biological_process	0.27344	1	1	66	19	4727	ENSSSCG00000001912	PML|
GO:0006275	regulation of DNA replication	biological_process	0.27354	1	1	66	21	4727	ENSSSCG00000001912	PML|
GO:0048771	tissue remodeling	biological_process	0.27354	1	1	66	20	4727	ENSSSCG00000001912	PML|
GO:0071560	cellular response to transforming growth factor beta stimulus	biological_process	0.27387	1	1	66	20	4727	ENSSSCG00000001912	PML|
GO:0018130	heterocycle biosynthetic process	biological_process	0.27433	1	11	66	627	4727	ENSSSCG00000016520,ENSSSCG00000016057,ENSSSCG00000026362,ENSSSCG00000008647,ENSSSCG00000028326,ENSSSCG00000001050,ENSSSCG00000001912,ENSSSCG00000005724,ENSSSCG00000009882,ENSSSCG00000009997,ENSSSCG00000011951	CREB3L2|STAT1|HES1|CMPK2|NR4A1|EDN1|PML|SETX|OAS1|OSM|NFKBIZ|
GO:0051173	positive regulation of nitrogen compound metabolic process	biological_process	0.27447	1	5	66	242	4727	ENSSSCG00000028326,ENSSSCG00000026362,ENSSSCG00000016520,ENSSSCG00000009997,ENSSSCG00000005724	NR4A1|HES1|CREB3L2|OSM|SETX|
GO:0001892	embryonic placenta development	biological_process	0.27453	1	1	66	21	4727	ENSSSCG00000026362	HES1|
GO:0048565	digestive tract development	biological_process	0.27531	1	1	66	21	4727	ENSSSCG00000026362	HES1|
GO:0071383	cellular response to steroid hormone stimulus	biological_process	0.27593	1	1	66	21	4727	ENSSSCG00000028326	NR4A1|
GO:0001726	ruffle	cellular_component	0.27681	1	1	66	20	4727	ENSSSCG00000010454	IFIT5|
GO:0008016	regulation of heart contraction	biological_process	0.27704	1	1	66	23	4727	ENSSSCG00000001050	EDN1|
GO:0019904	protein domain specific binding	molecular_function	0.27742	1	2	66	73	4727	ENSSSCG00000023304,ENSSSCG00000022916	SRRM2|EVL|
GO:0042471	ear morphogenesis	biological_process	0.27948	1	1	66	22	4727	ENSSSCG00000001050	EDN1|
GO:0051017	actin filament bundle assembly	biological_process	0.27995	1	1	66	21	4727	ENSSSCG00000022916	EVL|
GO:0061572	actin filament bundle organization	biological_process	0.27995	1	1	66	21	4727	ENSSSCG00000022916	EVL|
GO:0072331	signal transduction by p53 class mediator	biological_process	0.28113	1	1	66	23	4727	ENSSSCG00000001912	PML|
GO:1902275	regulation of chromatin organization	biological_process	0.28137	1	1	66	22	4727	ENSSSCG00000001912	PML|
GO:0051298	centrosome duplication	biological_process	0.28218	1	1	66	22	4727	ENSSSCG00000016925	PLK2|
GO:0030814	regulation of cAMP metabolic process	biological_process	0.28252	1	1	66	24	4727	ENSSSCG00000001050	EDN1|
GO:0006633	fatty acid biosynthetic process	biological_process	0.28292	1	1	66	23	4727	ENSSSCG00000001050	EDN1|
GO:0008083	growth factor activity	molecular_function	0.28302	1	1	66	24	4727	ENSSSCG00000009997	OSM|
GO:0043409	negative regulation of MAPK cascade	biological_process	0.28484	1	1	66	23	4727	ENSSSCG00000010831	DUSP10|
GO:0061053	somite development	biological_process	0.28503	1	1	66	23	4727	ENSSSCG00000026412	-|
GO:0003206	cardiac chamber morphogenesis	biological_process	0.28543	1	1	66	22	4727	ENSSSCG00000026362	HES1|
GO:0071216	cellular response to biotic stimulus	biological_process	0.28548	1	1	66	21	4727	ENSSSCG00000008647	CMPK2|
GO:0071219	cellular response to molecule of bacterial origin	biological_process	0.28548	1	1	66	21	4727	ENSSSCG00000008647	CMPK2|
GO:0005789	endoplasmic reticulum membrane	cellular_component	0.28549	1	2	66	68	4727	ENSSSCG00000008648,ENSSSCG00000001912	RSAD2|PML|
GO:0005524	ATP binding	molecular_function	0.28611	1	7	66	343	4727	ENSSSCG00000015071,ENSSSCG00000016925,ENSSSCG00000024996,ENSSSCG00000009882,ENSSSCG00000017146,ENSSSCG00000015525,ENSSSCG00000026336	SIK3|PLK2|-|OAS1|RNF213|TOR3A|-|
GO:0071559	response to transforming growth factor beta stimulus	biological_process	0.28674	1	1	66	21	4727	ENSSSCG00000001912	PML|
GO:0007611	learning or memory	biological_process	0.28802	1	1	66	22	4727	ENSSSCG00000016925	PLK2|
GO:0044422	organelle part	cellular_component	0.28804	1	19	66	1130	4727	ENSSSCG00000001912,ENSSSCG00000015525,ENSSSCG00000005724,ENSSSCG00000015074,ENSSSCG00000026362,ENSSSCG00000028326,ENSSSCG00000012076,ENSSSCG00000008647,ENSSSCG00000022486,ENSSSCG00000008648,ENSSSCG00000023304,ENSSSCG00000010831,ENSSSCG00000021725,ENSSSCG00000016925,ENSSSCG00000009806,ENSSSCG00000002538,ENSSSCG00000024398,ENSSSCG00000016520,ENSSSCG00000012077	PML|TOR3A|SETX|SIDT2|HES1|NR4A1|MX2|CMPK2|CBLB|RSAD2|SRRM2|DUSP10|PDS5B|PLK2|SETD1B|DYNC1H1|-|CREB3L2|MX1|
GO:0072521	purine-containing compound metabolic process	biological_process	0.28829	1	4	66	179	4727	ENSSSCG00000029531,ENSSSCG00000001050,ENSSSCG00000005738,ENSSSCG00000009882	-|EDN1|RALGDS|OAS1|
GO:0090257	regulation of muscle system process	biological_process	0.28832	1	1	66	24	4727	ENSSSCG00000001050	EDN1|
GO:0055067	monovalent inorganic cation homeostasis	biological_process	0.28878	1	1	66	22	4727	ENSSSCG00000001050	EDN1|
GO:0019220	regulation of phosphate metabolic process	biological_process	0.28913	1	6	66	296	4727	ENSSSCG00000009997,ENSSSCG00000005738,ENSSSCG00000001050,ENSSSCG00000001912,ENSSSCG00000026362,ENSSSCG00000010831	OSM|RALGDS|EDN1|PML|HES1|DUSP10|
GO:0007010	cytoskeleton organization	biological_process	0.28919	1	5	66	232	4727	ENSSSCG00000022916,ENSSSCG00000001050,ENSSSCG00000016925,ENSSSCG00000002538,ENSSSCG00000027580	EVL|EDN1|PLK2|DYNC1H1|-|
GO:0007219	Notch signaling pathway	biological_process	0.28922	1	1	66	24	4727	ENSSSCG00000026362	HES1|
GO:0005814	centriole	cellular_component	0.28933	1	1	66	23	4727	ENSSSCG00000016925	PLK2|
GO:0006352	DNA-dependent transcription, initiation	biological_process	0.28988	1	1	66	25	4727	ENSSSCG00000005724	SETX|
GO:0032943	mononuclear cell proliferation	biological_process	0.28992	1	1	66	23	4727	ENSSSCG00000026362	HES1|
GO:0046651	lymphocyte proliferation	biological_process	0.28992	1	1	66	23	4727	ENSSSCG00000026362	HES1|
GO:0032990	cell part morphogenesis	biological_process	0.29008	1	3	66	122	4727	ENSSSCG00000026412,ENSSSCG00000026383,ENSSSCG00000006495	-|NRP2|SEMA4A|
GO:0042175	nuclear outer membrane-endoplasmic reticulum membrane network	cellular_component	0.29068	1	2	66	69	4727	ENSSSCG00000001912,ENSSSCG00000008648	PML|RSAD2|
GO:0051174	regulation of phosphorus metabolic process	biological_process	0.29193	1	6	66	297	4727	ENSSSCG00000026362,ENSSSCG00000010831,ENSSSCG00000009997,ENSSSCG00000001050,ENSSSCG00000005738,ENSSSCG00000001912	HES1|DUSP10|OSM|EDN1|RALGDS|PML|
GO:0019199	transmembrane receptor protein kinase activity	molecular_function	0.29263	1	1	66	22	4727	ENSSSCG00000026383	NRP2|
GO:0005741	mitochondrial outer membrane	cellular_component	0.29273	1	1	66	23	4727	ENSSSCG00000008648	RSAD2|
GO:0031968	organelle outer membrane	cellular_component	0.29273	1	1	66	23	4727	ENSSSCG00000008648	RSAD2|
GO:0003015	heart process	biological_process	0.29398	1	1	66	25	4727	ENSSSCG00000001050	EDN1|
GO:0060047	heart contraction	biological_process	0.29398	1	1	66	25	4727	ENSSSCG00000001050	EDN1|
GO:0006810	transport	biological_process	0.29505	1	14	66	807	4727	ENSSSCG00000012076,ENSSSCG00000026362,ENSSSCG00000015074,ENSSSCG00000009997,ENSSSCG00000010991,ENSSSCG00000026552,ENSSSCG00000001050,ENSSSCG00000001912,ENSSSCG00000012077,ENSSSCG00000016520,ENSSSCG00000003797,ENSSSCG00000008648,ENSSSCG00000010453,ENSSSCG00000025932	MX2|HES1|SIDT2|OSM|AQP3|HIATL1|EDN1|PML|MX1|CREB3L2|DIRAS3|RSAD2|IFIT1|AP1S3|
GO:0009141	nucleoside triphosphate metabolic process	biological_process	0.29577	1	3	66	124	4727	ENSSSCG00000005738,ENSSSCG00000029531,ENSSSCG00000008647	RALGDS|-|CMPK2|
GO:0007098	centrosome cycle	biological_process	0.29634	1	1	66	24	4727	ENSSSCG00000016925	PLK2|
GO:0010562	positive regulation of phosphorus metabolic process	biological_process	0.29686	1	3	66	126	4727	ENSSSCG00000026362,ENSSSCG00000009997,ENSSSCG00000001050	HES1|OSM|EDN1|
GO:0045937	positive regulation of phosphate metabolic process	biological_process	0.29686	1	3	66	126	4727	ENSSSCG00000001050,ENSSSCG00000009997,ENSSSCG00000026362	EDN1|OSM|HES1|
GO:0044271	cellular nitrogen compound biosynthetic process	biological_process	0.29707	1	11	66	640	4727	ENSSSCG00000016520,ENSSSCG00000005724,ENSSSCG00000009882,ENSSSCG00000009997,ENSSSCG00000011951,ENSSSCG00000001050,ENSSSCG00000001912,ENSSSCG00000008647,ENSSSCG00000028326,ENSSSCG00000026362,ENSSSCG00000016057	CREB3L2|SETX|OAS1|OSM|NFKBIZ|EDN1|PML|CMPK2|NR4A1|HES1|STAT1|
GO:0030027	lamellipodium	cellular_component	0.29743	1	1	66	22	4727	ENSSSCG00000022916	EVL|
GO:0010604	positive regulation of macromolecule metabolic process	biological_process	0.2983	1	7	66	367	4727	ENSSSCG00000001912,ENSSSCG00000001050,ENSSSCG00000005724,ENSSSCG00000009997,ENSSSCG00000028326,ENSSSCG00000016520,ENSSSCG00000026362	PML|EDN1|SETX|OSM|NR4A1|CREB3L2|HES1|
GO:0019867	outer membrane	cellular_component	0.29851	1	1	66	24	4727	ENSSSCG00000008648	RSAD2|
GO:0009913	epidermal cell differentiation	biological_process	0.29864	1	1	66	23	4727	ENSSSCG00000026362	HES1|
GO:0010951	negative regulation of endopeptidase activity	biological_process	0.29935	1	1	66	26	4727	ENSSSCG00000028326	NR4A1|
GO:0071901	negative regulation of protein serine/threonine kinase activity	biological_process	0.29949	1	1	66	24	4727	ENSSSCG00000010831	DUSP10|
GO:0030336	negative regulation of cell migration	biological_process	0.30022	1	1	66	23	4727	ENSSSCG00000022916	EVL|
GO:2000146	negative regulation of cell motility	biological_process	0.30022	1	1	66	23	4727	ENSSSCG00000022916	EVL|
GO:0055123	digestive system development	biological_process	0.30078	1	1	66	23	4727	ENSSSCG00000026362	HES1|
GO:1901362	organic cyclic compound biosynthetic process	biological_process	0.30147	1	11	66	643	4727	ENSSSCG00000016520,ENSSSCG00000026362,ENSSSCG00000016057,ENSSSCG00000028326,ENSSSCG00000008647,ENSSSCG00000005724,ENSSSCG00000009997,ENSSSCG00000011951,ENSSSCG00000009882,ENSSSCG00000001912,ENSSSCG00000001050	CREB3L2|HES1|STAT1|NR4A1|CMPK2|SETX|OSM|NFKBIZ|OAS1|PML|EDN1|
GO:0031328	positive regulation of cellular biosynthetic process	biological_process	0.30183	1	5	66	254	4727	ENSSSCG00000016520,ENSSSCG00000026362,ENSSSCG00000028326,ENSSSCG00000005724,ENSSSCG00000009997	CREB3L2|HES1|NR4A1|SETX|OSM|
GO:0022626	cytosolic ribosome	cellular_component	0.30196	1	1	66	36	4727	ENSSSCG00000024398	-|
GO:0032559	adenyl ribonucleotide binding	molecular_function	0.30314	1	7	66	349	4727	ENSSSCG00000024996,ENSSSCG00000016925,ENSSSCG00000015071,ENSSSCG00000026336,ENSSSCG00000015525,ENSSSCG00000017146,ENSSSCG00000009882	-|PLK2|SIK3|-|TOR3A|RNF213|OAS1|
GO:0016569	covalent chromatin modification	biological_process	0.30344	1	2	66	74	4727	ENSSSCG00000009806,ENSSSCG00000001912	SETD1B|PML|
GO:0016570	histone modification	biological_process	0.30344	1	2	66	74	4727	ENSSSCG00000009806,ENSSSCG00000001912	SETD1B|PML|
GO:0031325	positive regulation of cellular metabolic process	biological_process	0.30532	1	7	66	371	4727	ENSSSCG00000005724,ENSSSCG00000009997,ENSSSCG00000001912,ENSSSCG00000001050,ENSSSCG00000016520,ENSSSCG00000026362,ENSSSCG00000028326	SETX|OSM|PML|EDN1|CREB3L2|HES1|NR4A1|
GO:0035107	appendage morphogenesis	biological_process	0.30565	1	1	66	26	4727	ENSSSCG00000026412	-|
GO:0035108	limb morphogenesis	biological_process	0.30565	1	1	66	26	4727	ENSSSCG00000026412	-|
GO:0019932	second-messenger-mediated signaling	biological_process	0.30739	1	1	66	25	4727	ENSSSCG00000001050	EDN1|
GO:0072330	monocarboxylic acid biosynthetic process	biological_process	0.30763	1	1	66	26	4727	ENSSSCG00000001050	EDN1|
GO:0048872	homeostasis of number of cells	biological_process	0.30779	1	1	66	26	4727	ENSSSCG00000027982	ISG15|
GO:0070661	leukocyte proliferation	biological_process	0.30787	1	1	66	25	4727	ENSSSCG00000026362	HES1|
GO:0033218	amide binding	molecular_function	0.30804	1	1	66	27	4727	ENSSSCG00000001341	SLA-11|
GO:0042277	peptide binding	molecular_function	0.30804	1	1	66	27	4727	ENSSSCG00000001341	SLA-11|
GO:0016887	ATPase activity	molecular_function	0.3087	1	3	66	123	4727	ENSSSCG00000017146,ENSSSCG00000015525,ENSSSCG00000017148	RNF213|TOR3A|-|
GO:0030554	adenyl nucleotide binding	molecular_function	0.30972	1	7	66	352	4727	ENSSSCG00000016925,ENSSSCG00000024996,ENSSSCG00000015071,ENSSSCG00000026336,ENSSSCG00000015525,ENSSSCG00000017146,ENSSSCG00000009882	PLK2|-|SIK3|-|TOR3A|RNF213|OAS1|
GO:0001890	placenta development	biological_process	0.31199	1	1	66	25	4727	ENSSSCG00000026362	HES1|
GO:0050870	positive regulation of T cell activation	biological_process	0.31209	1	1	66	25	4727	ENSSSCG00000026362	HES1|
GO:0003231	cardiac ventricle development	biological_process	0.31218	1	1	66	24	4727	ENSSSCG00000026362	HES1|
GO:0001071	nucleic acid binding transcription factor activity	molecular_function	0.31257	1	4	66	207	4727	ENSSSCG00000028326,ENSSSCG00000016057,ENSSSCG00000026362,ENSSSCG00000016520	NR4A1|STAT1|HES1|CREB3L2|
GO:0003700	sequence-specific DNA binding transcription factor activity	molecular_function	0.31257	1	4	66	207	4727	ENSSSCG00000028326,ENSSSCG00000016057,ENSSSCG00000026362,ENSSSCG00000016520	NR4A1|STAT1|HES1|CREB3L2|
GO:0006006	glucose metabolic process	biological_process	0.31284	1	1	66	25	4727	ENSSSCG00000009882	OAS1|
GO:0044057	regulation of system process	biological_process	0.31406	1	2	66	80	4727	ENSSSCG00000001050,ENSSSCG00000016925	EDN1|PLK2|
GO:0032182	small conjugating protein binding	molecular_function	0.31564	1	1	66	23	4727	ENSSSCG00000001912	PML|
GO:0004721	phosphoprotein phosphatase activity	molecular_function	0.31631	1	1	66	26	4727	ENSSSCG00000010831	DUSP10|
GO:0005694	chromosome	cellular_component	0.31632	1	3	66	138	4727	ENSSSCG00000005724,ENSSSCG00000016925,ENSSSCG00000021725	SETX|PLK2|PDS5B|
GO:0071495	cellular response to endogenous stimulus	biological_process	0.31687	1	3	66	129	4727	ENSSSCG00000028326,ENSSSCG00000001912,ENSSSCG00000005724	NR4A1|PML|SETX|
GO:0007163	establishment or maintenance of cell polarity	biological_process	0.31778	1	1	66	24	4727	ENSSSCG00000026362	HES1|
GO:0032103	positive regulation of response to external stimulus	biological_process	0.31797	1	1	66	30	4727	ENSSSCG00000023868	C3AR1|
GO:0014070	response to organic cyclic compound	biological_process	0.31799	1	2	66	77	4727	ENSSSCG00000010453,ENSSSCG00000028326	IFIT1|NR4A1|
GO:0030802	regulation of cyclic nucleotide biosynthetic process	biological_process	0.31843	1	1	66	27	4727	ENSSSCG00000001050	EDN1|
GO:0046058	cAMP metabolic process	biological_process	0.31853	1	1	66	27	4727	ENSSSCG00000001050	EDN1|
GO:0071013	catalytic step 2 spliceosome	cellular_component	0.31939	1	1	66	25	4727	ENSSSCG00000023304	SRRM2|
GO:0015931	nucleobase-containing compound transport	biological_process	0.31996	1	1	66	25	4727	ENSSSCG00000015074	SIDT2|
GO:0050880	regulation of blood vessel size	biological_process	0.32034	1	1	66	27	4727	ENSSSCG00000001050	EDN1|
GO:0031324	negative regulation of cellular metabolic process	biological_process	0.32055	1	5	66	263	4727	ENSSSCG00000026362,ENSSSCG00000027982,ENSSSCG00000010831,ENSSSCG00000001050,ENSSSCG00000001912	HES1|ISG15|DUSP10|EDN1|PML|
GO:0050707	regulation of cytokine secretion	biological_process	0.32099	1	1	66	26	4727	ENSSSCG00000001912	PML|
GO:0022411	cellular component disassembly	biological_process	0.32122	1	1	66	23	4727	ENSSSCG00000005724	SETX|
GO:0006355	regulation of transcription, DNA-dependent	biological_process	0.32202	1	9	66	522	4727	ENSSSCG00000001050,ENSSSCG00000001912,ENSSSCG00000005724,ENSSSCG00000009997,ENSSSCG00000011951,ENSSSCG00000028326,ENSSSCG00000026362,ENSSSCG00000016057,ENSSSCG00000016520	EDN1|PML|SETX|OSM|NFKBIZ|NR4A1|HES1|STAT1|CREB3L2|
GO:0022604	regulation of cell morphogenesis	biological_process	0.32235	1	2	66	75	4727	ENSSSCG00000006495,ENSSSCG00000026412	SEMA4A|-|
GO:0006281	DNA repair	biological_process	0.32293	1	2	66	77	4727	ENSSSCG00000005724,ENSSSCG00000001912	SETX|PML|
GO:2001141	regulation of RNA biosynthetic process	biological_process	0.32372	1	9	66	523	4727	ENSSSCG00000016520,ENSSSCG00000001912,ENSSSCG00000001050,ENSSSCG00000009997,ENSSSCG00000005724,ENSSSCG00000011951,ENSSSCG00000028326,ENSSSCG00000026362,ENSSSCG00000016057	CREB3L2|PML|EDN1|OSM|SETX|NFKBIZ|NR4A1|HES1|STAT1|
GO:0030833	regulation of actin filament polymerization	biological_process	0.32394	1	1	66	26	4727	ENSSSCG00000022916	EVL|
GO:0010605	negative regulation of macromolecule metabolic process	biological_process	0.32419	1	5	66	264	4727	ENSSSCG00000027982,ENSSSCG00000026362,ENSSSCG00000010831,ENSSSCG00000001050,ENSSSCG00000001912	ISG15|HES1|DUSP10|EDN1|PML|
GO:0044391	ribosomal subunit	cellular_component	0.32523	1	1	66	41	4727	ENSSSCG00000024398	-|
GO:0010466	negative regulation of peptidase activity	biological_process	0.32546	1	1	66	29	4727	ENSSSCG00000028326	NR4A1|
GO:0045596	negative regulation of cell differentiation	biological_process	0.32546	1	2	66	83	4727	ENSSSCG00000026362,ENSSSCG00000006495	HES1|SEMA4A|
GO:0003018	vascular process in circulatory system	biological_process	0.32647	1	1	66	28	4727	ENSSSCG00000001050	EDN1|
GO:0051345	positive regulation of hydrolase activity	biological_process	0.32654	1	3	66	132	4727	ENSSSCG00000013835,ENSSSCG00000005738,ENSSSCG00000001912	CASP14|RALGDS|PML|
GO:0043122	regulation of I-kappaB kinase/NF-kappaB cascade	biological_process	0.32703	1	1	66	27	4727	ENSSSCG00000016925	PLK2|
GO:0051924	regulation of calcium ion transport	biological_process	0.32719	1	1	66	25	4727	ENSSSCG00000001912	PML|
GO:0031346	positive regulation of cell projection organization	biological_process	0.32731	1	1	66	24	4727	ENSSSCG00000005724	SETX|
GO:0035150	regulation of tube size	biological_process	0.32741	1	1	66	28	4727	ENSSSCG00000001050	EDN1|
GO:0048736	appendage development	biological_process	0.33007	1	1	66	28	4727	ENSSSCG00000026412	-|
GO:0060173	limb development	biological_process	0.33007	1	1	66	28	4727	ENSSSCG00000026412	-|
GO:0006412	translation	biological_process	0.33027	1	2	66	97	4727	ENSSSCG00000001912,ENSSSCG00000024398	PML|-|
GO:0048545	response to steroid hormone stimulus	biological_process	0.33031	1	1	66	26	4727	ENSSSCG00000028326	NR4A1|
GO:0051271	negative regulation of cellular component movement	biological_process	0.33041	1	1	66	26	4727	ENSSSCG00000022916	EVL|
GO:0030808	regulation of nucleotide biosynthetic process	biological_process	0.33052	1	1	66	28	4727	ENSSSCG00000001050	EDN1|
GO:1900371	regulation of purine nucleotide biosynthetic process	biological_process	0.33052	1	1	66	28	4727	ENSSSCG00000001050	EDN1|
GO:0044093	positive regulation of molecular function	biological_process	0.33091	1	5	66	249	4727	ENSSSCG00000026362,ENSSSCG00000013835,ENSSSCG00000005738,ENSSSCG00000001912,ENSSSCG00000001050	HES1|CASP14|RALGDS|PML|EDN1|
GO:0003735	structural constituent of ribosome	molecular_function	0.33099	1	1	66	42	4727	ENSSSCG00000024398	-|
GO:0003712	transcription cofactor activity	molecular_function	0.33172	1	2	66	77	4727	ENSSSCG00000001912,ENSSSCG00000011951	PML|NFKBIZ|
GO:0030509	BMP signaling pathway	biological_process	0.33195	1	1	66	29	4727	ENSSSCG00000026362	HES1|
GO:0009416	response to light stimulus	biological_process	0.33216	1	1	66	27	4727	ENSSSCG00000001912	PML|
GO:0008217	regulation of blood pressure	biological_process	0.33229	1	1	66	28	4727	ENSSSCG00000001050	EDN1|
GO:0006479	protein methylation	biological_process	0.33241	1	1	66	25	4727	ENSSSCG00000009806	SETD1B|
GO:0008213	protein alkylation	biological_process	0.33241	1	1	66	25	4727	ENSSSCG00000009806	SETD1B|
GO:0006417	regulation of translation	biological_process	0.33264	1	1	66	26	4727	ENSSSCG00000001912	PML|
GO:0046822	regulation of nucleocytoplasmic transport	biological_process	0.33346	1	1	66	27	4727	ENSSSCG00000012076	MX2|
GO:0003729	mRNA binding	molecular_function	0.33439	1	1	66	28	4727	ENSSSCG00000024398	-|
GO:0043406	positive regulation of MAP kinase activity	biological_process	0.33479	1	1	66	26	4727	ENSSSCG00000001050	EDN1|
GO:0008064	regulation of actin polymerization or depolymerization	biological_process	0.33508	1	1	66	27	4727	ENSSSCG00000022916	EVL|
GO:0030832	regulation of actin filament length	biological_process	0.33508	1	1	66	27	4727	ENSSSCG00000022916	EVL|
GO:0002366	leukocyte activation involved in immune response	biological_process	0.33514	1	1	66	29	4727	ENSSSCG00000006495	SEMA4A|
GO:0021953	central nervous system neuron differentiation	biological_process	0.3353	1	1	66	26	4727	ENSSSCG00000026383	NRP2|
GO:0030595	leukocyte chemotaxis	biological_process	0.33737	1	1	66	31	4727	ENSSSCG00000023868	C3AR1|
GO:2001020	regulation of response to DNA damage stimulus	biological_process	0.33948	1	1	66	28	4727	ENSSSCG00000001912	PML|
GO:0002449	lymphocyte mediated immunity	biological_process	0.34035	1	1	66	31	4727	ENSSSCG00000008648	RSAD2|
GO:0008757	S-adenosylmethionine-dependent methyltransferase activity	molecular_function	0.34079	1	1	66	26	4727	ENSSSCG00000009806	SETD1B|
GO:0006470	protein dephosphorylation	biological_process	0.34123	1	1	66	27	4727	ENSSSCG00000010831	DUSP10|
GO:0009451	RNA modification	biological_process	0.34224	1	1	66	29	4727	ENSSSCG00000008796	RBM47|
GO:0050663	cytokine secretion	biological_process	0.34274	1	1	66	28	4727	ENSSSCG00000001912	PML|
GO:0042742	defense response to bacterium	biological_process	0.343	1	1	66	35	4727	ENSSSCG00000027982	ISG15|
GO:0070507	regulation of microtubule cytoskeleton organization	biological_process	0.34527	1	1	66	27	4727	ENSSSCG00000016925	PLK2|
GO:0050769	positive regulation of neurogenesis	biological_process	0.34592	1	1	66	29	4727	ENSSSCG00000026362	HES1|
GO:0003205	cardiac chamber development	biological_process	0.34637	1	1	66	27	4727	ENSSSCG00000026362	HES1|
GO:0002263	cell activation involved in immune response	biological_process	0.34694	1	1	66	30	4727	ENSSSCG00000006495	SEMA4A|
GO:0050863	regulation of T cell activation	biological_process	0.34725	1	1	66	29	4727	ENSSSCG00000026362	HES1|
GO:0008360	regulation of cell shape	biological_process	0.34925	1	1	66	26	4727	ENSSSCG00000006495	SEMA4A|
GO:0030799	regulation of cyclic nucleotide metabolic process	biological_process	0.34926	1	1	66	30	4727	ENSSSCG00000001050	EDN1|
GO:0007126	meiosis	biological_process	0.34954	1	1	66	27	4727	ENSSSCG00000009997	OSM|
GO:0044421	extracellular region part	cellular_component	0.35031	1	9	66	533	4727	ENSSSCG00000011547,ENSSSCG00000010453,ENSSSCG00000006289,ENSSSCG00000001050,ENSSSCG00000015525,ENSSSCG00000009997,ENSSSCG00000006495,ENSSSCG00000013835,ENSSSCG00000002538	CPNE9|IFIT1|F5|EDN1|TOR3A|OSM|SEMA4A|CASP14|DYNC1H1|
GO:0007596	blood coagulation	biological_process	0.35102	1	1	66	30	4727	ENSSSCG00000006289	F5|
GO:0050817	coagulation	biological_process	0.35102	1	1	66	30	4727	ENSSSCG00000006289	F5|
GO:0052652	cyclic purine nucleotide metabolic process	biological_process	0.35215	1	1	66	30	4727	ENSSSCG00000001050	EDN1|
GO:0021700	developmental maturation	biological_process	0.3529	1	1	66	31	4727	ENSSSCG00000026362	HES1|
GO:0005576	extracellular region	cellular_component	0.35482	1	10	66	611	4727	ENSSSCG00000011547,ENSSSCG00000010453,ENSSSCG00000006289,ENSSSCG00000027982,ENSSSCG00000001050,ENSSSCG00000015525,ENSSSCG00000009997,ENSSSCG00000013835,ENSSSCG00000006495,ENSSSCG00000002538	CPNE9|IFIT1|F5|ISG15|EDN1|TOR3A|OSM|CASP14|SEMA4A|DYNC1H1|
GO:0030041	actin filament polymerization	biological_process	0.3551	1	1	66	29	4727	ENSSSCG00000022916	EVL|
GO:0001227	RNA polymerase II transcription regulatory region sequence-specific DNA binding transcription factor activity involved in negative regulation of transcription	molecular_function	0.35584	1	1	66	32	4727	ENSSSCG00000026362	HES1|
GO:0071375	cellular response to peptide hormone stimulus	biological_process	0.35623	1	1	66	30	4727	ENSSSCG00000028326	NR4A1|
GO:1901653	cellular response to peptide	biological_process	0.35623	1	1	66	30	4727	ENSSSCG00000028326	NR4A1|
GO:0045597	positive regulation of cell differentiation	biological_process	0.35704	1	2	66	91	4727	ENSSSCG00000027982,ENSSSCG00000026362	ISG15|HES1|
GO:0051223	regulation of protein transport	biological_process	0.35735	1	2	66	83	4727	ENSSSCG00000008648,ENSSSCG00000001912	RSAD2|PML|
GO:0016482	cytoplasmic transport	biological_process	0.35835	1	3	66	140	4727	ENSSSCG00000026362,ENSSSCG00000016520,ENSSSCG00000001912	HES1|CREB3L2|PML|
GO:0050890	cognition	biological_process	0.35838	1	1	66	28	4727	ENSSSCG00000016925	PLK2|
GO:0051252	regulation of RNA metabolic process	biological_process	0.35996	1	9	66	540	4727	ENSSSCG00000016520,ENSSSCG00000028326,ENSSSCG00000016057,ENSSSCG00000026362,ENSSSCG00000005724,ENSSSCG00000009997,ENSSSCG00000011951,ENSSSCG00000001912,ENSSSCG00000001050	CREB3L2|NR4A1|STAT1|HES1|SETX|OSM|NFKBIZ|PML|EDN1|
GO:0022613	ribonucleoprotein complex biogenesis	biological_process	0.36047	1	2	66	89	4727	ENSSSCG00000002538,ENSSSCG00000005724	DYNC1H1|SETX|
GO:0007599	hemostasis	biological_process	0.36189	1	1	66	31	4727	ENSSSCG00000006289	F5|
GO:0006351	transcription, DNA-dependent	biological_process	0.36275	1	9	66	544	4727	ENSSSCG00000016520,ENSSSCG00000016057,ENSSSCG00000026362,ENSSSCG00000028326,ENSSSCG00000001912,ENSSSCG00000001050,ENSSSCG00000005724,ENSSSCG00000009997,ENSSSCG00000011951	CREB3L2|STAT1|HES1|NR4A1|PML|EDN1|SETX|OSM|NFKBIZ|
GO:0009190	cyclic nucleotide biosynthetic process	biological_process	0.36352	1	1	66	31	4727	ENSSSCG00000001050	EDN1|
GO:0000989	transcription factor binding transcription factor activity	molecular_function	0.36391	1	2	66	83	4727	ENSSSCG00000001912,ENSSSCG00000011951	PML|NFKBIZ|
GO:0030323	respiratory tube development	biological_process	0.36535	1	1	66	31	4727	ENSSSCG00000026362	HES1|
GO:0030324	lung development	biological_process	0.36535	1	1	66	31	4727	ENSSSCG00000026362	HES1|
GO:0008154	actin polymerization or depolymerization	biological_process	0.36573	1	1	66	30	4727	ENSSSCG00000022916	EVL|
GO:0051321	meiotic cell cycle	biological_process	0.366	1	1	66	29	4727	ENSSSCG00000009997	OSM|
GO:0043434	response to peptide hormone stimulus	biological_process	0.36732	1	1	66	31	4727	ENSSSCG00000028326	NR4A1|
GO:0007423	sensory organ development	biological_process	0.37014	1	2	66	91	4727	ENSSSCG00000001050,ENSSSCG00000026362	EDN1|HES1|
GO:2000027	regulation of organ morphogenesis	biological_process	0.37029	1	1	66	31	4727	ENSSSCG00000026362	HES1|
GO:0010741	negative regulation of intracellular protein kinase cascade	biological_process	0.37126	1	1	66	32	4727	ENSSSCG00000010831	DUSP10|
GO:0032774	RNA biosynthetic process	biological_process	0.37219	1	9	66	548	4727	ENSSSCG00000016057,ENSSSCG00000026362,ENSSSCG00000028326,ENSSSCG00000011951,ENSSSCG00000005724,ENSSSCG00000009997,ENSSSCG00000001050,ENSSSCG00000001912,ENSSSCG00000016520	STAT1|HES1|NR4A1|NFKBIZ|SETX|OSM|EDN1|PML|CREB3L2|
GO:0055002	striated muscle cell development	biological_process	0.37235	1	1	66	32	4727	ENSSSCG00000001050	EDN1|
GO:0009893	positive regulation of metabolic process	biological_process	0.37237	1	7	66	398	4727	ENSSSCG00000028326,ENSSSCG00000026362,ENSSSCG00000016520,ENSSSCG00000005724,ENSSSCG00000009997,ENSSSCG00000001050,ENSSSCG00000001912	NR4A1|HES1|CREB3L2|SETX|OSM|EDN1|PML|
GO:0043168	anion binding	molecular_function	0.37281	1	10	66	570	4727	ENSSSCG00000015071,ENSSSCG00000012077,ENSSSCG00000016925,ENSSSCG00000024996,ENSSSCG00000003797,ENSSSCG00000012076,ENSSSCG00000017146,ENSSSCG00000009882,ENSSSCG00000015525,ENSSSCG00000026336	SIK3|MX1|PLK2|-|DIRAS3|MX2|RNF213|OAS1|TOR3A|-|
GO:0022607	cellular component assembly	biological_process	0.37322	1	7	66	399	4727	ENSSSCG00000022916,ENSSSCG00000001912,ENSSSCG00000001050,ENSSSCG00000005724,ENSSSCG00000009882,ENSSSCG00000026362,ENSSSCG00000002538	EVL|PML|EDN1|SETX|OAS1|HES1|DYNC1H1|
GO:0044260	cellular macromolecule metabolic process	biological_process	0.37384	1	22	66	1405	4727	ENSSSCG00000017146,ENSSSCG00000009997,ENSSSCG00000011951,ENSSSCG00000005724,ENSSSCG00000001912,ENSSSCG00000016057,ENSSSCG00000026362,ENSSSCG00000028326,ENSSSCG00000021712,ENSSSCG00000022486,ENSSSCG00000015071,ENSSSCG00000027982,ENSSSCG00000010831,ENSSSCG00000016925,ENSSSCG00000017148,ENSSSCG00000001050,ENSSSCG00000008796,ENSSSCG00000030548,ENSSSCG00000009806,ENSSSCG00000024398,ENSSSCG00000016520,…	RNF213|OSM|NFKBIZ|SETX|PML|STAT1|HES1|NR4A1|HERC6|CBLB|SIK3|ISG15|DUSP10|PLK2|-|EDN1|RBM47|HERC5|SETD1B|-|CREB3L2|-|
GO:0032886	regulation of microtubule-based process	biological_process	0.3742	1	1	66	30	4727	ENSSSCG00000016925	PLK2|
GO:0003774	motor activity	molecular_function	0.37515	1	1	66	29	4727	ENSSSCG00000002538	DYNC1H1|
GO:0045892	negative regulation of transcription, DNA-dependent	biological_process	0.37564	1	3	66	158	4727	ENSSSCG00000026362,ENSSSCG00000001912,ENSSSCG00000001050	HES1|PML|EDN1|
GO:0005840	ribosome	cellular_component	0.37647	1	1	66	46	4727	ENSSSCG00000024398	-|
GO:0019318	hexose metabolic process	biological_process	0.37667	1	1	66	31	4727	ENSSSCG00000009882	OAS1|
GO:0031647	regulation of protein stability	biological_process	0.37718	1	1	66	33	4727	ENSSSCG00000001912	PML|
GO:0032507	maintenance of protein location in cell	biological_process	0.37884	1	1	66	32	4727	ENSSSCG00000001912	PML|
GO:0007249	I-kappaB kinase/NF-kappaB cascade	biological_process	0.38018	1	1	66	32	4727	ENSSSCG00000016925	PLK2|
GO:0048839	inner ear development	biological_process	0.38067	1	1	66	32	4727	ENSSSCG00000026362	HES1|
GO:0044463	cell projection part	cellular_component	0.382	1	2	66	88	4727	ENSSSCG00000005724,ENSSSCG00000010454	SETX|IFIT5|
GO:0000988	protein binding transcription factor activity	molecular_function	0.38208	1	2	66	86	4727	ENSSSCG00000011951,ENSSSCG00000001912	NFKBIZ|PML|
GO:0060541	respiratory system development	biological_process	0.38226	1	1	66	33	4727	ENSSSCG00000026362	HES1|
GO:0051251	positive regulation of lymphocyte activation	biological_process	0.38226	1	1	66	33	4727	ENSSSCG00000026362	HES1|
GO:0005765	lysosomal membrane	cellular_component	0.38271	1	1	66	30	4727	ENSSSCG00000015074	SIDT2|
GO:0007224	smoothened signaling pathway	biological_process	0.3833	1	1	66	31	4727	ENSSSCG00000026362	HES1|
GO:1901698	response to nitrogen compound	biological_process	0.38343	1	2	66	86	4727	ENSSSCG00000028326,ENSSSCG00000010453	NR4A1|IFIT1|
GO:0032271	regulation of protein polymerization	biological_process	0.38375	1	1	66	32	4727	ENSSSCG00000022916	EVL|
GO:0004674	protein serine/threonine kinase activity	molecular_function	0.38449	1	2	66	87	4727	ENSSSCG00000024996,ENSSSCG00000016925	-|PLK2|
GO:0048598	embryonic morphogenesis	biological_process	0.38664	1	2	66	96	4727	ENSSSCG00000026362,ENSSSCG00000001050	HES1|EDN1|
GO:0060326	cell chemotaxis	biological_process	0.38701	1	1	66	37	4727	ENSSSCG00000023868	C3AR1|
GO:0044450	microtubule organizing center part	cellular_component	0.38744	1	1	66	32	4727	ENSSSCG00000016925	PLK2|
GO:0051297	centrosome organization	biological_process	0.3909	1	1	66	33	4727	ENSSSCG00000016925	PLK2|
GO:0009892	negative regulation of metabolic process	biological_process	0.39127	1	5	66	286	4727	ENSSSCG00000001912,ENSSSCG00000001050,ENSSSCG00000010831,ENSSSCG00000027982,ENSSSCG00000026362	PML|EDN1|DUSP10|ISG15|HES1|
GO:0033044	regulation of chromosome organization	biological_process	0.39144	1	1	66	34	4727	ENSSSCG00000001912	PML|
GO:0044238	primary metabolic process	biological_process	0.39225	1	29	66	1884	4727	ENSSSCG00000001912,ENSSSCG00000005724,ENSSSCG00000011951,ENSSSCG00000009997,ENSSSCG00000017146,ENSSSCG00000026443,ENSSSCG00000028326,ENSSSCG00000008647,ENSSSCG00000029531,ENSSSCG00000016057,ENSSSCG00000026362,ENSSSCG00000021712,ENSSSCG00000022486,ENSSSCG00000016925,ENSSSCG00000010831,ENSSSCG00000017148,ENSSSCG00000027982,ENSSSCG00000015071,ENSSSCG00000008796,ENSSSCG00000001050,ENSSSCG00000005738,…	PML|SETX|NFKBIZ|OSM|RNF213|-|NR4A1|CMPK2|-|STAT1|HES1|HERC6|CBLB|PLK2|DUSP10|-|ISG15|SIK3|RBM47|EDN1|RALGDS|OAS1|SETD1B|HERC5|NT5C3A|CASP14|-|-|CREB3L2|
GO:0070201	regulation of establishment of protein localization	biological_process	0.39301	1	2	66	90	4727	ENSSSCG00000008648,ENSSSCG00000001912	RSAD2|PML|
GO:0019941	modification-dependent protein catabolic process	biological_process	0.39331	1	2	66	86	4727	ENSSSCG00000027982,ENSSSCG00000001912	ISG15|PML|
GO:0043565	sequence-specific DNA binding	molecular_function	0.39493	1	3	66	164	4727	ENSSSCG00000005724,ENSSSCG00000016520,ENSSSCG00000028326	SETX|CREB3L2|NR4A1|
GO:0007051	spindle organization	biological_process	0.39593	1	1	66	33	4727	ENSSSCG00000016925	PLK2|
GO:0050727	regulation of inflammatory response	biological_process	0.39612	1	1	66	35	4727	ENSSSCG00000010831	DUSP10|
GO:0002440	production of molecular mediator of immune response	biological_process	0.39693	1	1	66	40	4727	ENSSSCG00000008648	RSAD2|
GO:1901652	response to peptide	biological_process	0.39849	1	1	66	34	4727	ENSSSCG00000028326	NR4A1|
GO:0008234	cysteine-type peptidase activity	molecular_function	0.399	1	1	66	32	4727	ENSSSCG00000013835	CASP14|
GO:0043170	macromolecule metabolic process	biological_process	0.39948	1	24	66	1562	4727	ENSSSCG00000026362,ENSSSCG00000016057,ENSSSCG00000028326,ENSSSCG00000017146,ENSSSCG00000011951,ENSSSCG00000009997,ENSSSCG00000005724,ENSSSCG00000001912,ENSSSCG00000015071,ENSSSCG00000027982,ENSSSCG00000016925,ENSSSCG00000010831,ENSSSCG00000017148,ENSSSCG00000022486,ENSSSCG00000021712,ENSSSCG00000013835,ENSSSCG00000009806,ENSSSCG00000030548,ENSSSCG00000009882,ENSSSCG00000001050,ENSSSCG00000008796,…	HES1|STAT1|NR4A1|RNF213|NFKBIZ|OSM|SETX|PML|SIK3|ISG15|PLK2|DUSP10|-|CBLB|HERC6|CASP14|SETD1B|HERC5|OAS1|EDN1|RBM47|CREB3L2|-|-|
GO:0006469	negative regulation of protein kinase activity	biological_process	0.39987	1	1	66	35	4727	ENSSSCG00000010831	DUSP10|
GO:0016568	chromatin modification	biological_process	0.40079	1	2	66	92	4727	ENSSSCG00000001912,ENSSSCG00000009806	PML|SETD1B|
GO:0016043	cellular component organization	biological_process	0.40136	1	15	66	926	4727	ENSSSCG00000016925,ENSSSCG00000021725,ENSSSCG00000026383,ENSSSCG00000026412,ENSSSCG00000002538,ENSSSCG00000027580,ENSSSCG00000006495,ENSSSCG00000026362,ENSSSCG00000015074,ENSSSCG00000009806,ENSSSCG00000009882,ENSSSCG00000005724,ENSSSCG00000022916,ENSSSCG00000001912,ENSSSCG00000001050	PLK2|PDS5B|NRP2|-|DYNC1H1|-|SEMA4A|HES1|SIDT2|SETD1B|OAS1|SETX|EVL|PML|EDN1|
GO:0031023	microtubule organizing center organization	biological_process	0.40173	1	1	66	34	4727	ENSSSCG00000016925	PLK2|
GO:0051276	chromosome organization	biological_process	0.40279	1	3	66	161	4727	ENSSSCG00000021725,ENSSSCG00000009806,ENSSSCG00000001912	PDS5B|SETD1B|PML|
GO:0000976	transcription regulatory region sequence-specific DNA binding	molecular_function	0.40384	1	2	66	98	4727	ENSSSCG00000016520,ENSSSCG00000005724	CREB3L2|SETX|
GO:0008544	epidermis development	biological_process	0.40406	1	1	66	34	4727	ENSSSCG00000026362	HES1|
GO:0043632	modification-dependent macromolecule catabolic process	biological_process	0.40455	1	2	66	88	4727	ENSSSCG00000001912,ENSSSCG00000027982	PML|ISG15|
GO:0090092	regulation of transmembrane receptor protein serine/threonine kinase signaling pathway	biological_process	0.40564	1	1	66	34	4727	ENSSSCG00000026362	HES1|
GO:0015850	organic hydroxy compound transport	biological_process	0.40727	1	1	66	38	4727	ENSSSCG00000010991	AQP3|
GO:0051253	negative regulation of RNA metabolic process	biological_process	0.40746	1	3	66	166	4727	ENSSSCG00000001050,ENSSSCG00000001912,ENSSSCG00000026362	EDN1|PML|HES1|
GO:0002696	positive regulation of leukocyte activation	biological_process	0.40769	1	1	66	36	4727	ENSSSCG00000026362	HES1|
GO:0006650	glycerophospholipid metabolic process	biological_process	0.40938	1	1	66	38	4727	ENSSSCG00000026443	-|
GO:0045185	maintenance of protein location	biological_process	0.40983	1	1	66	36	4727	ENSSSCG00000001912	PML|
GO:0005996	monosaccharide metabolic process	biological_process	0.41016	1	1	66	35	4727	ENSSSCG00000009882	OAS1|
GO:0009887	organ morphogenesis	biological_process	0.41138	1	3	66	159	4727	ENSSSCG00000010991,ENSSSCG00000001050,ENSSSCG00000026362	AQP3|EDN1|HES1|
GO:0001822	kidney development	biological_process	0.41324	1	1	66	37	4727	ENSSSCG00000026362	HES1|
GO:2000112	regulation of cellular macromolecule biosynthetic process	biological_process	0.41367	1	9	66	563	4727	ENSSSCG00000016520,ENSSSCG00000026362,ENSSSCG00000016057,ENSSSCG00000028326,ENSSSCG00000001912,ENSSSCG00000001050,ENSSSCG00000005724,ENSSSCG00000011951,ENSSSCG00000009997	CREB3L2|HES1|STAT1|NR4A1|PML|EDN1|SETX|NFKBIZ|OSM|
GO:0009187	cyclic nucleotide metabolic process	biological_process	0.41376	1	1	66	36	4727	ENSSSCG00000001050	EDN1|
GO:0033673	negative regulation of kinase activity	biological_process	0.41445	1	1	66	37	4727	ENSSSCG00000010831	DUSP10|
GO:0016788	hydrolase activity, acting on ester bonds	molecular_function	0.41471	1	3	66	157	4727	ENSSSCG00000029531,ENSSSCG00000022912,ENSSSCG00000010831	-|NT5C3A|DUSP10|
GO:0051651	maintenance of location in cell	biological_process	0.41606	1	1	66	36	4727	ENSSSCG00000001912	PML|
GO:0043085	positive regulation of catalytic activity	biological_process	0.41793	1	4	66	216	4727	ENSSSCG00000013835,ENSSSCG00000001912,ENSSSCG00000005738,ENSSSCG00000001050	CASP14|PML|RALGDS|EDN1|
GO:0030855	epithelial cell differentiation	biological_process	0.4214	1	2	66	98	4727	ENSSSCG00000026362,ENSSSCG00000015074	HES1|SIDT2|
GO:0044237	cellular metabolic process	biological_process	0.42257	1	28	66	1832	4727	ENSSSCG00000024398,ENSSSCG00000016520,ENSSSCG00000024996,ENSSSCG00000009882,ENSSSCG00000001050,ENSSSCG00000005738,ENSSSCG00000008796,ENSSSCG00000022912,ENSSSCG00000009806,ENSSSCG00000030548,ENSSSCG00000022486,ENSSSCG00000021712,ENSSSCG00000015071,ENSSSCG00000027982,ENSSSCG00000010831,ENSSSCG00000017148,ENSSSCG00000016925,ENSSSCG00000017146,ENSSSCG00000005724,ENSSSCG00000009997,ENSSSCG00000011951,…	-|CREB3L2|-|OAS1|EDN1|RALGDS|RBM47|NT5C3A|SETD1B|HERC5|CBLB|HERC6|SIK3|ISG15|DUSP10|-|PLK2|RNF213|SETX|OSM|NFKBIZ|PML|HES1|STAT1|NR4A1|CMPK2|-|-|
GO:0030258	lipid modification	biological_process	0.42316	1	1	66	37	4727	ENSSSCG00000026443	-|
GO:0019219	regulation of nucleobase-containing compound metabolic process	biological_process	0.42323	1	11	66	695	4727	ENSSSCG00000016520,ENSSSCG00000026362,ENSSSCG00000016057,ENSSSCG00000028326,ENSSSCG00000005738,ENSSSCG00000001050,ENSSSCG00000001912,ENSSSCG00000009997,ENSSSCG00000005724,ENSSSCG00000009882,ENSSSCG00000011951	CREB3L2|HES1|STAT1|NR4A1|RALGDS|EDN1|PML|OSM|SETX|OAS1|NFKBIZ|
GO:0045177	apical part of cell	cellular_component	0.42569	1	1	66	36	4727	ENSSSCG00000010454	IFIT5|
GO:2000113	negative regulation of cellular macromolecule biosynthetic process	biological_process	0.42659	1	3	66	170	4727	ENSSSCG00000026362,ENSSSCG00000001050,ENSSSCG00000001912	HES1|EDN1|PML|
GO:0000978	RNA polymerase II core promoter proximal region sequence-specific DNA binding	molecular_function	0.42817	1	1	66	40	4727	ENSSSCG00000016520	CREB3L2|
GO:0009790	embryo development	biological_process	0.42932	1	3	66	165	4727	ENSSSCG00000026362,ENSSSCG00000026412,ENSSSCG00000001050	HES1|-|EDN1|
GO:0010959	regulation of metal ion transport	biological_process	0.43108	1	1	66	37	4727	ENSSSCG00000001912	PML|
GO:0010556	regulation of macromolecule biosynthetic process	biological_process	0.43283	1	9	66	572	4727	ENSSSCG00000016520,ENSSSCG00000001912,ENSSSCG00000001050,ENSSSCG00000005724,ENSSSCG00000009997,ENSSSCG00000011951,ENSSSCG00000016057,ENSSSCG00000026362,ENSSSCG00000028326	CREB3L2|PML|EDN1|SETX|OSM|NFKBIZ|STAT1|HES1|NR4A1|
GO:0002443	leukocyte mediated immunity	biological_process	0.43335	1	1	66	43	4727	ENSSSCG00000008648	RSAD2|
GO:0009719	response to endogenous stimulus	biological_process	0.43346	1	3	66	156	4727	ENSSSCG00000005724,ENSSSCG00000001912,ENSSSCG00000028326	SETX|PML|NR4A1|
GO:0071902	positive regulation of protein serine/threonine kinase activity	biological_process	0.43518	1	1	66	36	4727	ENSSSCG00000001050	EDN1|
GO:0051171	regulation of nitrogen compound metabolic process	biological_process	0.43637	1	11	66	702	4727	ENSSSCG00000016520,ENSSSCG00000009997,ENSSSCG00000005724,ENSSSCG00000009882,ENSSSCG00000011951,ENSSSCG00000001050,ENSSSCG00000005738,ENSSSCG00000001912,ENSSSCG00000016057,ENSSSCG00000026362,ENSSSCG00000028326	CREB3L2|OSM|SETX|OAS1|NFKBIZ|EDN1|RALGDS|PML|STAT1|HES1|NR4A1|
GO:0010720	positive regulation of cell development	biological_process	0.43779	1	1	66	41	4727	ENSSSCG00000026362	HES1|
GO:0051047	positive regulation of secretion	biological_process	0.43785	1	1	66	41	4727	ENSSSCG00000001050	EDN1|
GO:0007059	chromosome segregation	biological_process	0.43814	1	1	66	39	4727	ENSSSCG00000021725	PDS5B|
GO:0050867	positive regulation of cell activation	biological_process	0.43867	1	1	66	39	4727	ENSSSCG00000026362	HES1|
GO:0051249	regulation of lymphocyte activation	biological_process	0.43913	1	1	66	40	4727	ENSSSCG00000026362	HES1|
GO:0010558	negative regulation of macromolecule biosynthetic process	biological_process	0.43998	1	3	66	173	4727	ENSSSCG00000001912,ENSSSCG00000001050,ENSSSCG00000026362	PML|EDN1|HES1|
GO:0043588	skin development	biological_process	0.44137	1	1	66	38	4727	ENSSSCG00000026362	HES1|
GO:0005681	spliceosomal complex	cellular_component	0.4425	1	1	66	38	4727	ENSSSCG00000023304	SRRM2|
GO:0051603	proteolysis involved in cellular protein catabolic process	biological_process	0.44552	1	2	66	96	4727	ENSSSCG00000001912,ENSSSCG00000027982	PML|ISG15|
GO:0000375	RNA splicing, via transesterification reactions	biological_process	0.44631	1	1	66	40	4727	ENSSSCG00000005724	SETX|
GO:0000377	RNA splicing, via transesterification reactions with bulged adenosine as nucleophile	biological_process	0.44631	1	1	66	40	4727	ENSSSCG00000005724	SETX|
GO:0000398	mRNA splicing, via spliceosome	biological_process	0.44631	1	1	66	40	4727	ENSSSCG00000005724	SETX|
GO:0046983	protein dimerization activity	molecular_function	0.44647	1	3	66	178	4727	ENSSSCG00000001912,ENSSSCG00000028326,ENSSSCG00000026362	PML|NR4A1|HES1|
GO:0000987	core promoter proximal region sequence-specific DNA binding	molecular_function	0.44833	1	1	66	42	4727	ENSSSCG00000016520	CREB3L2|
GO:0001159	core promoter proximal region DNA binding	molecular_function	0.44833	1	1	66	42	4727	ENSSSCG00000016520	CREB3L2|
GO:0046914	transition metal ion binding	molecular_function	0.44895	1	5	66	295	4727	ENSSSCG00000001912,ENSSSCG00000017146,ENSSSCG00000022486,ENSSSCG00000009882,ENSSSCG00000006289	PML|RNF213|CBLB|OAS1|F5|
GO:0010629	negative regulation of gene expression	biological_process	0.45019	1	3	66	176	4727	ENSSSCG00000026362,ENSSSCG00000001050,ENSSSCG00000001912	HES1|EDN1|PML|
GO:0000122	negative regulation of transcription from RNA polymerase II promoter	biological_process	0.45203	1	2	66	108	4727	ENSSSCG00000026362,ENSSSCG00000001050	HES1|EDN1|
GO:0006936	muscle contraction	biological_process	0.45469	1	1	66	40	4727	ENSSSCG00000001050	EDN1|
GO:0045859	regulation of protein kinase activity	biological_process	0.45565	1	2	66	102	4727	ENSSSCG00000010831,ENSSSCG00000001050	DUSP10|EDN1|
GO:0034622	cellular macromolecular complex assembly	biological_process	0.456	1	3	66	173	4727	ENSSSCG00000005724,ENSSSCG00000022916,ENSSSCG00000002538	SETX|EVL|DYNC1H1|
GO:0033365	protein localization to organelle	biological_process	0.4571	1	2	66	105	4727	ENSSSCG00000026362,ENSSSCG00000001912	HES1|PML|
GO:0032880	regulation of protein localization	biological_process	0.45722	1	2	66	102	4727	ENSSSCG00000001912,ENSSSCG00000008648	PML|RSAD2|
GO:0007018	microtubule-based movement	biological_process	0.45755	1	1	66	39	4727	ENSSSCG00000002538	DYNC1H1|
GO:0071704	organic substance metabolic process	biological_process	0.45823	1	29	66	1928	4727	ENSSSCG00000016057,ENSSSCG00000026362,ENSSSCG00000029531,ENSSSCG00000028326,ENSSSCG00000008647,ENSSSCG00000026443,ENSSSCG00000017146,ENSSSCG00000011951,ENSSSCG00000005724,ENSSSCG00000009997,ENSSSCG00000001912,ENSSSCG00000015071,ENSSSCG00000027982,ENSSSCG00000017148,ENSSSCG00000010831,ENSSSCG00000016925,ENSSSCG00000022486,ENSSSCG00000021712,ENSSSCG00000013835,ENSSSCG00000022912,ENSSSCG00000009806,…	STAT1|HES1|-|NR4A1|CMPK2|-|RNF213|NFKBIZ|SETX|OSM|PML|SIK3|ISG15|-|DUSP10|PLK2|CBLB|HERC6|CASP14|NT5C3A|SETD1B|HERC5|OAS1|EDN1|RALGDS|RBM47|CREB3L2|-|-|
GO:0010639	negative regulation of organelle organization	biological_process	0.45858	1	1	66	41	4727	ENSSSCG00000001912	PML|
GO:0070925	organelle assembly	biological_process	0.46064	1	2	66	103	4727	ENSSSCG00000002538,ENSSSCG00000001050	DYNC1H1|EDN1|
GO:0030162	regulation of proteolysis	biological_process	0.46156	1	1	66	40	4727	ENSSSCG00000001912	PML|
GO:0010035	response to inorganic substance	biological_process	0.46188	1	1	66	40	4727	ENSSSCG00000005724	SETX|
GO:0060249	anatomical structure homeostasis	biological_process	0.4624	1	1	66	41	4727	ENSSSCG00000001912	PML|
GO:0001664	G-protein coupled receptor binding	molecular_function	0.46331	1	1	66	48	4727	ENSSSCG00000001050	EDN1|
GO:0030141	secretory granule	cellular_component	0.46387	1	1	66	41	4727	ENSSSCG00000006289	F5|
GO:0048585	negative regulation of response to stimulus	biological_process	0.46398	1	3	66	169	4727	ENSSSCG00000010453,ENSSSCG00000006495,ENSSSCG00000010831	IFIT1|SEMA4A|DUSP10|
GO:0007519	skeletal muscle tissue development	biological_process	0.46431	1	1	66	44	4727	ENSSSCG00000028326	NR4A1|
GO:0009314	response to radiation	biological_process	0.46677	1	1	66	42	4727	ENSSSCG00000001912	PML|
GO:0072001	renal system development	biological_process	0.46833	1	1	66	43	4727	ENSSSCG00000026362	HES1|
GO:0046486	glycerolipid metabolic process	biological_process	0.46846	1	1	66	46	4727	ENSSSCG00000026443	-|
GO:0008270	zinc ion binding	molecular_function	0.46866	1	4	66	233	4727	ENSSSCG00000001912,ENSSSCG00000022486,ENSSSCG00000009882,ENSSSCG00000017146	PML|CBLB|OAS1|RNF213|
GO:0006325	chromatin organization	biological_process	0.46946	1	2	66	113	4727	ENSSSCG00000001912,ENSSSCG00000009806	PML|SETD1B|
GO:0051052	regulation of DNA metabolic process	biological_process	0.47051	1	1	66	44	4727	ENSSSCG00000001912	PML|
GO:0031625	ubiquitin protein ligase binding	molecular_function	0.47082	1	1	66	41	4727	ENSSSCG00000001912	PML|
GO:0050900	leukocyte migration	biological_process	0.47139	1	1	66	45	4727	ENSSSCG00000023868	C3AR1|
GO:0006644	phospholipid metabolic process	biological_process	0.47173	1	1	66	45	4727	ENSSSCG00000026443	-|
GO:0030155	regulation of cell adhesion	biological_process	0.47185	1	1	66	39	4727	ENSSSCG00000001912	PML|
GO:0005813	centrosome	cellular_component	0.47226	1	2	66	103	4727	ENSSSCG00000002538,ENSSSCG00000016925	DYNC1H1|PLK2|
GO:0060538	skeletal muscle organ development	biological_process	0.47378	1	1	66	45	4727	ENSSSCG00000028326	NR4A1|
GO:0044257	cellular protein catabolic process	biological_process	0.47529	1	2	66	102	4727	ENSSSCG00000001912,ENSSSCG00000027982	PML|ISG15|
GO:0043414	macromolecule methylation	biological_process	0.47587	1	1	66	41	4727	ENSSSCG00000009806	SETD1B|
GO:0000287	magnesium ion binding	molecular_function	0.47707	1	1	66	42	4727	ENSSSCG00000022912	NT5C3A|
GO:0071840	cellular component organization or biogenesis	biological_process	0.47733	1	15	66	970	4727	ENSSSCG00000026383,ENSSSCG00000026412,ENSSSCG00000021725,ENSSSCG00000016925,ENSSSCG00000001912,ENSSSCG00000022916,ENSSSCG00000001050,ENSSSCG00000005724,ENSSSCG00000009882,ENSSSCG00000015074,ENSSSCG00000009806,ENSSSCG00000002538,ENSSSCG00000026362,ENSSSCG00000027580,ENSSSCG00000006495	NRP2|-|PDS5B|PLK2|PML|EVL|EDN1|SETX|OAS1|SIDT2|SETD1B|DYNC1H1|HES1|-|SEMA4A|
GO:0007268	synaptic transmission	biological_process	0.47834	1	2	66	106	4727	ENSSSCG00000001050,ENSSSCG00000016925	EDN1|PLK2|
GO:0031090	organelle membrane	cellular_component	0.47849	1	5	66	300	4727	ENSSSCG00000012077,ENSSSCG00000028326,ENSSSCG00000015074,ENSSSCG00000008648,ENSSSCG00000001912	MX1|NR4A1|SIDT2|RSAD2|PML|
GO:0009143	nucleoside triphosphate catabolic process	biological_process	0.47891	1	2	66	102	4727	ENSSSCG00000029531,ENSSSCG00000005738	-|RALGDS|
GO:0009146	purine nucleoside triphosphate catabolic process	biological_process	0.47891	1	2	66	102	4727	ENSSSCG00000029531,ENSSSCG00000005738	-|RALGDS|
GO:0044389	small conjugating protein ligase binding	molecular_function	0.48025	1	1	66	42	4727	ENSSSCG00000001912	PML|
GO:0003007	heart morphogenesis	biological_process	0.48046	1	1	66	43	4727	ENSSSCG00000026362	HES1|
GO:0008152	metabolic process	biological_process	0.48199	1	34	66	2280	4727	ENSSSCG00000024996,ENSSSCG00000016520,ENSSSCG00000024398,ENSSSCG00000009806,ENSSSCG00000030548,ENSSSCG00000002538,ENSSSCG00000022912,ENSSSCG00000005738,ENSSSCG00000010831,ENSSSCG00000027982,ENSSSCG00000015071,ENSSSCG00000022486,ENSSSCG00000012076,ENSSSCG00000008647,ENSSSCG00000026362,ENSSSCG00000001912,ENSSSCG00000017146,ENSSSCG00000012077,ENSSSCG00000010453,ENSSSCG00000013835,ENSSSCG00000008796,…	-|CREB3L2|-|SETD1B|HERC5|DYNC1H1|NT5C3A|RALGDS|DUSP10|ISG15|SIK3|CBLB|MX2|CMPK2|HES1|PML|RNF213|MX1|IFIT1|CASP14|RBM47|EDN1|OAS1|PLK2|-|HERC6|RSAD2|-|NR4A1|-|STAT1|NFKBIZ|OSM|SETX|
GO:0043549	regulation of kinase activity	biological_process	0.48237	1	2	66	108	4727	ENSSSCG00000001050,ENSSSCG00000010831	EDN1|DUSP10|
GO:0034613	cellular protein localization	biological_process	0.48519	1	4	66	240	4727	ENSSSCG00000026362,ENSSSCG00000025932,ENSSSCG00000001912,ENSSSCG00000010453	HES1|AP1S3|PML|IFIT1|
GO:0001933	negative regulation of protein phosphorylation	biological_process	0.48597	1	1	66	46	4727	ENSSSCG00000010831	DUSP10|
GO:0002694	regulation of leukocyte activation	biological_process	0.4887	1	1	66	46	4727	ENSSSCG00000026362	HES1|
GO:0045934	negative regulation of nucleobase-containing compound metabolic process	biological_process	0.48925	1	3	66	187	4727	ENSSSCG00000001912,ENSSSCG00000001050,ENSSSCG00000026362	PML|EDN1|HES1|
GO:0060255	regulation of macromolecule metabolic process	biological_process	0.49231	1	12	66	795	4727	ENSSSCG00000010831,ENSSSCG00000027982,ENSSSCG00000016520,ENSSSCG00000028326,ENSSSCG00000026362,ENSSSCG00000016057,ENSSSCG00000001050,ENSSSCG00000001912,ENSSSCG00000005724,ENSSSCG00000009997,ENSSSCG00000009882,ENSSSCG00000011951	DUSP10|ISG15|CREB3L2|NR4A1|HES1|STAT1|EDN1|PML|SETX|OSM|OAS1|NFKBIZ|
GO:0046777	protein autophosphorylation	biological_process	0.49314	1	1	66	42	4727	ENSSSCG00000024996	-|
GO:0050678	regulation of epithelial cell proliferation	biological_process	0.49479	1	1	66	45	4727	ENSSSCG00000026362	HES1|
GO:0044085	cellular component biogenesis	biological_process	0.49519	1	7	66	449	4727	ENSSSCG00000026362,ENSSSCG00000002538,ENSSSCG00000001050,ENSSSCG00000001912,ENSSSCG00000022916,ENSSSCG00000005724,ENSSSCG00000009882	HES1|DYNC1H1|EDN1|PML|EVL|SETX|OAS1|
GO:0070727	cellular macromolecule localization	biological_process	0.49582	1	4	66	243	4727	ENSSSCG00000010453,ENSSSCG00000025932,ENSSSCG00000001912,ENSSSCG00000026362	IFIT1|AP1S3|PML|HES1|
GO:0005774	vacuolar membrane	cellular_component	0.49639	1	1	66	43	4727	ENSSSCG00000015074	SIDT2|
GO:0000226	microtubule cytoskeleton organization	biological_process	0.49769	1	2	66	108	4727	ENSSSCG00000002538,ENSSSCG00000016925	DYNC1H1|PLK2|
GO:0051172	negative regulation of nitrogen compound metabolic process	biological_process	0.49803	1	3	66	190	4727	ENSSSCG00000026362,ENSSSCG00000001912,ENSSSCG00000001050	HES1|PML|EDN1|
GO:0080090	regulation of primary metabolic process	biological_process	0.50026	1	13	66	866	4727	ENSSSCG00000028326,ENSSSCG00000026362,ENSSSCG00000016057,ENSSSCG00000005724,ENSSSCG00000009997,ENSSSCG00000011951,ENSSSCG00000009882,ENSSSCG00000005738,ENSSSCG00000001912,ENSSSCG00000001050,ENSSSCG00000027982,ENSSSCG00000016520,ENSSSCG00000010831	NR4A1|HES1|STAT1|SETX|OSM|NFKBIZ|OAS1|RALGDS|PML|EDN1|ISG15|CREB3L2|DUSP10|
GO:0031327	negative regulation of cellular biosynthetic process	biological_process	0.50071	1	3	66	189	4727	ENSSSCG00000026362,ENSSSCG00000001050,ENSSSCG00000001912	HES1|EDN1|PML|
GO:0006260	DNA replication	biological_process	0.50148	1	1	66	45	4727	ENSSSCG00000001912	PML|
GO:0008168	methyltransferase activity	molecular_function	0.50271	1	1	66	46	4727	ENSSSCG00000009806	SETD1B|
GO:0009890	negative regulation of biosynthetic process	biological_process	0.50303	1	3	66	190	4727	ENSSSCG00000001050,ENSSSCG00000001912,ENSSSCG00000026362	EDN1|PML|HES1|
GO:0005085	guanyl-nucleotide exchange factor activity	molecular_function	0.50317	1	1	66	43	4727	ENSSSCG00000005738	RALGDS|
GO:0051258	protein polymerization	biological_process	0.50364	1	1	66	47	4727	ENSSSCG00000022916	EVL|
GO:0018193	peptidyl-amino acid modification	biological_process	0.50475	1	3	66	176	4727	ENSSSCG00000009997,ENSSSCG00000024996,ENSSSCG00000026362	OSM|-|HES1|
GO:0005667	transcription factor complex	cellular_component	0.50497	1	1	66	46	4727	ENSSSCG00000028326	NR4A1|
GO:0044437	vacuolar part	cellular_component	0.50505	1	1	66	44	4727	ENSSSCG00000015074	SIDT2|
GO:0006631	fatty acid metabolic process	biological_process	0.50641	1	1	66	47	4727	ENSSSCG00000001050	EDN1|
GO:0005739	mitochondrion	cellular_component	0.50966	1	4	66	255	4727	ENSSSCG00000008647,ENSSSCG00000022912,ENSSSCG00000008648,ENSSSCG00000010452	CMPK2|NT5C3A|RSAD2|IFIT3|
GO:0031326	regulation of cellular biosynthetic process	biological_process	0.51047	1	9	66	610	4727	ENSSSCG00000016520,ENSSSCG00000026362,ENSSSCG00000016057,ENSSSCG00000028326,ENSSSCG00000001912,ENSSSCG00000001050,ENSSSCG00000011951,ENSSSCG00000005724,ENSSSCG00000009997	CREB3L2|HES1|STAT1|NR4A1|PML|EDN1|NFKBIZ|SETX|OSM|
GO:0042326	negative regulation of phosphorylation	biological_process	0.51115	1	1	66	49	4727	ENSSSCG00000010831	DUSP10|
GO:0019222	regulation of metabolic process	biological_process	0.51143	1	15	66	1005	4727	ENSSSCG00000010453,ENSSSCG00000016520,ENSSSCG00000027982,ENSSSCG00000010831,ENSSSCG00000009882,ENSSSCG00000005724,ENSSSCG00000009997,ENSSSCG00000011951,ENSSSCG00000001050,ENSSSCG00000005738,ENSSSCG00000001912,ENSSSCG00000016057,ENSSSCG00000026362,ENSSSCG00000013835,ENSSSCG00000028326	IFIT1|CREB3L2|ISG15|DUSP10|OAS1|SETX|OSM|NFKBIZ|EDN1|RALGDS|PML|STAT1|HES1|CASP14|NR4A1|
GO:0003713	transcription coactivator activity	molecular_function	0.51335	1	1	66	46	4727	ENSSSCG00000001912	PML|
GO:0009152	purine ribonucleotide biosynthetic process	biological_process	0.51349	1	1	66	50	4727	ENSSSCG00000001050	EDN1|
GO:0006139	nucleobase-containing compound metabolic process	biological_process	0.5144	1	15	66	1016	4727	ENSSSCG00000005724,ENSSSCG00000011951,ENSSSCG00000009997,ENSSSCG00000009882,ENSSSCG00000001050,ENSSSCG00000005738,ENSSSCG00000001912,ENSSSCG00000008796,ENSSSCG00000016057,ENSSSCG00000026362,ENSSSCG00000022912,ENSSSCG00000008647,ENSSSCG00000028326,ENSSSCG00000029531,ENSSSCG00000016520	SETX|NFKBIZ|OSM|OAS1|EDN1|RALGDS|PML|RBM47|STAT1|HES1|NT5C3A|CMPK2|NR4A1|-|CREB3L2|
GO:0003012	muscle system process	biological_process	0.51503	1	1	66	48	4727	ENSSSCG00000001050	EDN1|
GO:0016741	transferase activity, transferring one-carbon groups	molecular_function	0.51527	1	1	66	48	4727	ENSSSCG00000009806	SETD1B|
GO:0009889	regulation of biosynthetic process	biological_process	0.51565	1	9	66	612	4727	ENSSSCG00000009997,ENSSSCG00000005724,ENSSSCG00000011951,ENSSSCG00000001912,ENSSSCG00000001050,ENSSSCG00000028326,ENSSSCG00000016057,ENSSSCG00000026362,ENSSSCG00000016520	OSM|SETX|NFKBIZ|PML|EDN1|NR4A1|STAT1|HES1|CREB3L2|
GO:0001655	urogenital system development	biological_process	0.51682	1	1	66	51	4727	ENSSSCG00000026362	HES1|
GO:0005815	microtubule organizing center	cellular_component	0.51733	1	2	66	112	4727	ENSSSCG00000016925,ENSSSCG00000002538	PLK2|DYNC1H1|
GO:0005911	cell-cell junction	cellular_component	0.51763	1	1	66	47	4727	ENSSSCG00000010991	AQP3|
GO:0016053	organic acid biosynthetic process	biological_process	0.5205	1	1	66	49	4727	ENSSSCG00000001050	EDN1|
GO:0046394	carboxylic acid biosynthetic process	biological_process	0.5205	1	1	66	49	4727	ENSSSCG00000001050	EDN1|
GO:0009260	ribonucleotide biosynthetic process	biological_process	0.52187	1	1	66	51	4727	ENSSSCG00000001050	EDN1|
GO:0046390	ribose phosphate biosynthetic process	biological_process	0.52187	1	1	66	51	4727	ENSSSCG00000001050	EDN1|
GO:0006195	purine nucleotide catabolic process	biological_process	0.52399	1	2	66	113	4727	ENSSSCG00000029531,ENSSSCG00000005738	-|RALGDS|
GO:0009166	nucleotide catabolic process	biological_process	0.52399	1	2	66	113	4727	ENSSSCG00000005738,ENSSSCG00000029531	RALGDS|-|
GO:1901292	nucleoside phosphate catabolic process	biological_process	0.52399	1	2	66	113	4727	ENSSSCG00000029531,ENSSSCG00000005738	-|RALGDS|
GO:0005874	microtubule	cellular_component	0.52491	1	1	66	47	4727	ENSSSCG00000002538	DYNC1H1|
GO:0043005	neuron projection	cellular_component	0.52521	1	2	66	114	4727	ENSSSCG00000026383,ENSSSCG00000005724	NRP2|SETX|
GO:0042176	regulation of protein catabolic process	biological_process	0.52529	1	1	66	49	4727	ENSSSCG00000001912	PML|
GO:0044281	small molecule metabolic process	biological_process	0.5276	1	6	66	383	4727	ENSSSCG00000029531,ENSSSCG00000008647,ENSSSCG00000022912,ENSSSCG00000009882,ENSSSCG00000001050,ENSSSCG00000005738	-|CMPK2|NT5C3A|OAS1|EDN1|RALGDS|
GO:0022892	substrate-specific transporter activity	molecular_function	0.52764	1	4	66	257	4727	ENSSSCG00000015074,ENSSSCG00000025932,ENSSSCG00000026552,ENSSSCG00000010991	SIDT2|AP1S3|HIATL1|AQP3|
GO:0010927	cellular component assembly involved in morphogenesis	biological_process	0.52823	1	1	66	47	4727	ENSSSCG00000001050	EDN1|
GO:0044427	chromosomal part	cellular_component	0.52901	1	2	66	124	4727	ENSSSCG00000016925,ENSSSCG00000021725	PLK2|PDS5B|
GO:0051235	maintenance of location	biological_process	0.5294	1	1	66	51	4727	ENSSSCG00000001912	PML|
GO:0051259	protein oligomerization	biological_process	0.53148	1	1	66	55	4727	ENSSSCG00000009882	OAS1|
GO:0008380	RNA splicing	biological_process	0.53277	1	1	66	51	4727	ENSSSCG00000005724	SETX|
GO:0043235	receptor complex	cellular_component	0.53316	1	1	66	48	4727	ENSSSCG00000026412	-|
GO:1901564	organonitrogen compound metabolic process	biological_process	0.53317	1	5	66	322	4727	ENSSSCG00000009882,ENSSSCG00000005738,ENSSSCG00000001050,ENSSSCG00000008647,ENSSSCG00000029531	OAS1|RALGDS|EDN1|CMPK2|-|
GO:0048193	Golgi vesicle transport	biological_process	0.53695	1	1	66	46	4727	ENSSSCG00000016520	CREB3L2|
GO:0007264	small GTPase mediated signal transduction	biological_process	0.53791	1	2	66	116	4727	ENSSSCG00000005738,ENSSSCG00000003797	RALGDS|DIRAS3|
GO:0072523	purine-containing compound catabolic process	biological_process	0.53886	1	2	66	116	4727	ENSSSCG00000005738,ENSSSCG00000029531	RALGDS|-|
GO:0042060	wound healing	biological_process	0.54211	1	1	66	53	4727	ENSSSCG00000006289	F5|
GO:0044445	cytosolic part	cellular_component	0.54329	1	1	66	68	4727	ENSSSCG00000024398	-|
GO:0046434	organophosphate catabolic process	biological_process	0.54386	1	2	66	117	4727	ENSSSCG00000005738,ENSSSCG00000029531	RALGDS|-|
GO:0050673	epithelial cell proliferation	biological_process	0.54449	1	1	66	52	4727	ENSSSCG00000026362	HES1|
GO:0005925	focal adhesion	cellular_component	0.54479	1	1	66	52	4727	ENSSSCG00000022916	EVL|
GO:0050865	regulation of cell activation	biological_process	0.54521	1	1	66	53	4727	ENSSSCG00000026362	HES1|
GO:0030054	cell junction	cellular_component	0.54535	1	2	66	119	4727	ENSSSCG00000022916,ENSSSCG00000010991	EVL|AQP3|
GO:0046483	heterocycle metabolic process	biological_process	0.54596	1	15	66	1034	4727	ENSSSCG00000016520,ENSSSCG00000001912,ENSSSCG00000005738,ENSSSCG00000001050,ENSSSCG00000008796,ENSSSCG00000005724,ENSSSCG00000009997,ENSSSCG00000011951,ENSSSCG00000009882,ENSSSCG00000016057,ENSSSCG00000026362,ENSSSCG00000022912,ENSSSCG00000029531,ENSSSCG00000028326,ENSSSCG00000008647	CREB3L2|PML|RALGDS|EDN1|RBM47|SETX|OSM|NFKBIZ|OAS1|STAT1|HES1|NT5C3A|-|NR4A1|CMPK2|
GO:0010468	regulation of gene expression	biological_process	0.54662	1	9	66	622	4727	ENSSSCG00000016057,ENSSSCG00000026362,ENSSSCG00000028326,ENSSSCG00000001050,ENSSSCG00000001912,ENSSSCG00000005724,ENSSSCG00000011951,ENSSSCG00000009997,ENSSSCG00000016520	STAT1|HES1|NR4A1|EDN1|PML|SETX|NFKBIZ|OSM|CREB3L2|
GO:0006725	cellular aromatic compound metabolic process	biological_process	0.5519	1	15	66	1037	4727	ENSSSCG00000016520,ENSSSCG00000009997,ENSSSCG00000005724,ENSSSCG00000009882,ENSSSCG00000011951,ENSSSCG00000001912,ENSSSCG00000005738,ENSSSCG00000001050,ENSSSCG00000008796,ENSSSCG00000026362,ENSSSCG00000016057,ENSSSCG00000022912,ENSSSCG00000029531,ENSSSCG00000028326,ENSSSCG00000008647	CREB3L2|OSM|SETX|OAS1|NFKBIZ|PML|RALGDS|EDN1|RBM47|HES1|STAT1|NT5C3A|-|NR4A1|CMPK2|
GO:0005924	cell-substrate adherens junction	cellular_component	0.55292	1	1	66	53	4727	ENSSSCG00000022916	EVL|
GO:0030055	cell-substrate junction	cellular_component	0.55292	1	1	66	53	4727	ENSSSCG00000022916	EVL|
GO:0044255	cellular lipid metabolic process	biological_process	0.55307	1	2	66	126	4727	ENSSSCG00000026443,ENSSSCG00000001050	-|EDN1|
GO:0044765	single-organism transport	biological_process	0.55566	1	10	66	680	4727	ENSSSCG00000026362,ENSSSCG00000015074,ENSSSCG00000010991,ENSSSCG00000009997,ENSSSCG00000001912,ENSSSCG00000001050,ENSSSCG00000026552,ENSSSCG00000016520,ENSSSCG00000008648,ENSSSCG00000025932	HES1|SIDT2|AQP3|OSM|PML|EDN1|HIATL1|CREB3L2|RSAD2|AP1S3|
GO:0009144	purine nucleoside triphosphate metabolic process	biological_process	0.55728	1	2	66	120	4727	ENSSSCG00000029531,ENSSSCG00000005738	-|RALGDS|
GO:0031323	regulation of cellular metabolic process	biological_process	0.55808	1	13	66	894	4727	ENSSSCG00000001912,ENSSSCG00000005738,ENSSSCG00000001050,ENSSSCG00000009997,ENSSSCG00000005724,ENSSSCG00000011951,ENSSSCG00000009882,ENSSSCG00000026362,ENSSSCG00000016057,ENSSSCG00000028326,ENSSSCG00000010831,ENSSSCG00000016520,ENSSSCG00000027982	PML|RALGDS|EDN1|OSM|SETX|NFKBIZ|OAS1|HES1|STAT1|NR4A1|DUSP10|CREB3L2|ISG15|
GO:1901136	carbohydrate derivative catabolic process	biological_process	0.56054	1	2	66	120	4727	ENSSSCG00000005738,ENSSSCG00000029531	RALGDS|-|
GO:0005743	mitochondrial inner membrane	cellular_component	0.56083	1	1	66	55	4727	ENSSSCG00000008648	RSAD2|
GO:0030529	ribonucleoprotein complex	cellular_component	0.5684	1	2	66	139	4727	ENSSSCG00000023304,ENSSSCG00000024398	SRRM2|-|
GO:0030163	protein catabolic process	biological_process	0.56885	1	2	66	123	4727	ENSSSCG00000027982,ENSSSCG00000001912	ISG15|PML|
GO:0000323	lytic vacuole	cellular_component	0.5693	1	1	66	54	4727	ENSSSCG00000015074	SIDT2|
GO:0005764	lysosome	cellular_component	0.5693	1	1	66	54	4727	ENSSSCG00000015074	SIDT2|
GO:0032787	monocarboxylic acid metabolic process	biological_process	0.57427	1	1	66	57	4727	ENSSSCG00000001050	EDN1|
GO:0016070	RNA metabolic process	biological_process	0.57592	1	10	66	714	4727	ENSSSCG00000016520,ENSSSCG00000026362,ENSSSCG00000016057,ENSSSCG00000028326,ENSSSCG00000009997,ENSSSCG00000005724,ENSSSCG00000011951,ENSSSCG00000001912,ENSSSCG00000001050,ENSSSCG00000008796	CREB3L2|HES1|STAT1|NR4A1|OSM|SETX|NFKBIZ|PML|EDN1|RBM47|
GO:0051656	establishment of organelle localization	biological_process	0.57682	1	1	66	56	4727	ENSSSCG00000002538	DYNC1H1|
GO:0006397	mRNA processing	biological_process	0.57835	1	1	66	57	4727	ENSSSCG00000005724	SETX|
GO:0032259	methylation	biological_process	0.58424	1	1	66	57	4727	ENSSSCG00000009806	SETD1B|
GO:0071417	cellular response to organonitrogen compound	biological_process	0.58801	1	1	66	58	4727	ENSSSCG00000028326	NR4A1|
GO:1901360	organic cyclic compound metabolic process	biological_process	0.58863	1	15	66	1061	4727	ENSSSCG00000016520,ENSSSCG00000009997,ENSSSCG00000005724,ENSSSCG00000009882,ENSSSCG00000011951,ENSSSCG00000001912,ENSSSCG00000005738,ENSSSCG00000001050,ENSSSCG00000008796,ENSSSCG00000022912,ENSSSCG00000016057,ENSSSCG00000026362,ENSSSCG00000008647,ENSSSCG00000028326,ENSSSCG00000029531	CREB3L2|OSM|SETX|OAS1|NFKBIZ|PML|RALGDS|EDN1|RBM47|NT5C3A|STAT1|HES1|CMPK2|NR4A1|-|
GO:0019226	transmission of nerve impulse	biological_process	0.58895	1	2	66	129	4727	ENSSSCG00000016925,ENSSSCG00000001050	PLK2|EDN1|
GO:0019866	organelle inner membrane	cellular_component	0.59692	1	1	66	60	4727	ENSSSCG00000008648	RSAD2|
GO:1901137	carbohydrate derivative biosynthetic process	biological_process	0.59881	1	2	66	139	4727	ENSSSCG00000008647,ENSSSCG00000001050	CMPK2|EDN1|
GO:0002064	epithelial cell development	biological_process	0.60105	1	1	66	61	4727	ENSSSCG00000015074	SIDT2|
GO:0030031	cell projection assembly	biological_process	0.60355	1	1	66	58	4727	ENSSSCG00000022916	EVL|
GO:0034641	cellular nitrogen compound metabolic process	biological_process	0.60504	1	15	66	1069	4727	ENSSSCG00000009997,ENSSSCG00000005724,ENSSSCG00000009882,ENSSSCG00000011951,ENSSSCG00000001050,ENSSSCG00000005738,ENSSSCG00000001912,ENSSSCG00000008796,ENSSSCG00000026362,ENSSSCG00000016057,ENSSSCG00000022912,ENSSSCG00000028326,ENSSSCG00000029531,ENSSSCG00000008647,ENSSSCG00000016520	OSM|SETX|OAS1|NFKBIZ|EDN1|RALGDS|PML|RBM47|HES1|STAT1|NT5C3A|NR4A1|-|CMPK2|CREB3L2|
GO:0006816	calcium ion transport	biological_process	0.60878	1	1	66	60	4727	ENSSSCG00000001912	PML|
GO:0043161	proteasomal ubiquitin-dependent protein catabolic process	biological_process	0.61337	1	1	66	60	4727	ENSSSCG00000001912	PML|
GO:0010498	proteasomal protein catabolic process	biological_process	0.61683	1	1	66	61	4727	ENSSSCG00000001912	PML|
GO:0034645	cellular macromolecule biosynthetic process	biological_process	0.61685	1	10	66	750	4727	ENSSSCG00000028326,ENSSSCG00000016057,ENSSSCG00000026362,ENSSSCG00000011951,ENSSSCG00000005724,ENSSSCG00000009997,ENSSSCG00000001050,ENSSSCG00000001912,ENSSSCG00000016520,ENSSSCG00000024398	NR4A1|STAT1|HES1|NFKBIZ|SETX|OSM|EDN1|PML|CREB3L2|-|
GO:0005912	adherens junction	cellular_component	0.617	1	1	66	62	4727	ENSSSCG00000022916	EVL|
GO:0032870	cellular response to hormone stimulus	biological_process	0.62165	1	1	66	63	4727	ENSSSCG00000028326	NR4A1|
GO:0035637	multicellular organismal signaling	biological_process	0.62317	1	2	66	137	4727	ENSSSCG00000001050,ENSSSCG00000016925	EDN1|PLK2|
GO:0006996	organelle organization	biological_process	0.62341	1	8	66	569	4727	ENSSSCG00000016925,ENSSSCG00000021725,ENSSSCG00000001050,ENSSSCG00000001912,ENSSSCG00000022916,ENSSSCG00000002538,ENSSSCG00000027580,ENSSSCG00000009806	PLK2|PDS5B|EDN1|PML|EVL|DYNC1H1|-|SETD1B|
GO:0097458	neuron part	cellular_component	0.62413	1	2	66	136	4727	ENSSSCG00000026383,ENSSSCG00000005724	NRP2|SETX|
GO:0000228	nuclear chromosome	cellular_component	0.62474	1	1	66	70	4727	ENSSSCG00000005724	SETX|
GO:0006140	regulation of nucleotide metabolic process	biological_process	0.62808	1	2	66	138	4727	ENSSSCG00000005738,ENSSSCG00000001050	RALGDS|EDN1|
GO:1900542	regulation of purine nucleotide metabolic process	biological_process	0.62808	1	2	66	138	4727	ENSSSCG00000005738,ENSSSCG00000001050	RALGDS|EDN1|
GO:0070838	divalent metal ion transport	biological_process	0.62993	1	1	66	64	4727	ENSSSCG00000001912	PML|
GO:0072511	divalent inorganic cation transport	biological_process	0.62993	1	1	66	64	4727	ENSSSCG00000001912	PML|
GO:0044265	cellular macromolecule catabolic process	biological_process	0.63064	1	2	66	139	4727	ENSSSCG00000001912,ENSSSCG00000027982	PML|ISG15|
GO:0006508	proteolysis	biological_process	0.63085	1	3	66	215	4727	ENSSSCG00000013835,ENSSSCG00000027982,ENSSSCG00000001912	CASP14|ISG15|PML|
GO:0045860	positive regulation of protein kinase activity	biological_process	0.63195	1	1	66	63	4727	ENSSSCG00000001050	EDN1|
GO:0007517	muscle organ development	biological_process	0.63398	1	1	66	68	4727	ENSSSCG00000028326	NR4A1|
GO:0070161	anchoring junction	cellular_component	0.63454	1	1	66	65	4727	ENSSSCG00000022916	EVL|
[truncated: 147 more rows]

## Sheet: GSWW DOWN
GO_accession	Description	Term_type	Over_represented_pValue	Corrected_pValue	CAD_item	CAD_list	Bg_item	Bg_list	Gene_names	Gene_description
GO:0004064	arylesterase activity	molecular_function	0.00025774	1	2	25	5	4727	ENSSSCG00000027073,ENSSSCG00000015332	-|-|
GO:0009636	response to toxic substance	biological_process	0.0030871	1	2	25	16	4727	ENSSSCG00000027073,ENSSSCG00000015332	-|-|
GO:0000077	DNA damage checkpoint	biological_process	0.0032043	1	2	25	16	4727	ENSSSCG00000025851,ENSSSCG00000028283	-|-|
GO:0031570	DNA integrity checkpoint	biological_process	0.0040256	1	2	25	18	4727	ENSSSCG00000028283,ENSSSCG00000025851	-|-|
GO:0003857	3-hydroxyacyl-CoA dehydrogenase activity	molecular_function	0.0051377	1	1	25	1	4727	ENSSSCG00000001476	HSD17B8|
GO:0004303	estradiol 17-beta-dehydrogenase activity	molecular_function	0.0051377	1	1	25	1	4727	ENSSSCG00000001476	HSD17B8|
GO:0006703	estrogen biosynthetic process	biological_process	0.0051377	1	1	25	1	4727	ENSSSCG00000001476	HSD17B8|
GO:0008210	estrogen metabolic process	biological_process	0.0051377	1	1	25	1	4727	ENSSSCG00000001476	HSD17B8|
GO:0047035	testosterone dehydrogenase (NAD+) activity	molecular_function	0.0051377	1	1	25	1	4727	ENSSSCG00000001476	HSD17B8|
GO:0033553	rDNA heterochromatin	cellular_component	0.0051743	1	1	25	1	4727	ENSSSCG00000021717	SUV39H1|
GO:0046974	histone methyltransferase activity (H3-K9 specific)	molecular_function	0.0051743	1	1	25	1	4727	ENSSSCG00000021717	SUV39H1|
GO:0004063	aryldialkylphosphatase activity	molecular_function	0.0051853	1	1	25	1	4727	ENSSSCG00000015332	-|
GO:0031389	Rad17 RFC-like complex	cellular_component	0.0052495	1	1	25	1	4727	ENSSSCG00000028283	-|
GO:0003824	catalytic activity	molecular_function	0.0083383	1	13	25	1302	4727	ENSSSCG00000016893,ENSSSCG00000027073,ENSSSCG00000020848,ENSSSCG00000015332,ENSSSCG00000025851,ENSSSCG00000028283,ENSSSCG00000000376,ENSSSCG00000025988,ENSSSCG00000010597,ENSSSCG00000030262,ENSSSCG00000021717,ENSSSCG00000001476,ENSSSCG00000012000	NDUFS4|-|CMBL|-|-|-|-|-|TAF5|GDPD1|SUV39H1|HSD17B8|-|
GO:0016787	hydrolase activity	molecular_function	0.0084832	1	8	25	586	4727	ENSSSCG00000028283,ENSSSCG00000025851,ENSSSCG00000015332,ENSSSCG00000020848,ENSSSCG00000027073,ENSSSCG00000030262,ENSSSCG00000025988,ENSSSCG00000012000	-|-|-|CMBL|-|GDPD1|-|-|
GO:0052689	carboxylic ester hydrolase activity	molecular_function	0.0086318	1	2	25	27	4727	ENSSSCG00000027073,ENSSSCG00000015332	-|-|
GO:0016788	hydrolase activity, acting on ester bonds	molecular_function	0.0086555	1	4	25	157	4727	ENSSSCG00000025851,ENSSSCG00000027073,ENSSSCG00000015332,ENSSSCG00000030262	-|-|-|GDPD1|
GO:0002366	leukocyte activation involved in immune response	biological_process	0.0098391	1	2	25	29	4727	ENSSSCG00000026872,ENSSSCG00000027291	TNFSF13|-|
GO:0042128	nitrate assimilation	biological_process	0.010266	1	1	25	2	4727	ENSSSCG00000000376	-|
GO:0010257	NADH dehydrogenase complex assembly	biological_process	0.010381	1	1	25	2	4727	ENSSSCG00000016893	NDUFS4|
GO:0032981	mitochondrial respiratory chain complex I assembly	biological_process	0.010381	1	1	25	2	4727	ENSSSCG00000016893	NDUFS4|
GO:0097031	mitochondrial respiratory chain complex I biogenesis	biological_process	0.010381	1	1	25	2	4727	ENSSSCG00000016893	NDUFS4|
GO:0000183	chromatin silencing at rDNA	biological_process	0.010458	1	1	25	2	4727	ENSSSCG00000021717	SUV39H1|
GO:0005677	chromatin silencing complex	cellular_component	0.010458	1	1	25	2	4727	ENSSSCG00000021717	SUV39H1|
GO:0000974	Prp19 complex	cellular_component	0.010517	1	1	25	2	4727	ENSSSCG00000023216	-|
GO:0005662	DNA replication factor A complex	cellular_component	0.010517	1	1	25	2	4727	ENSSSCG00000023216	-|
GO:0002263	cell activation involved in immune response	biological_process	0.010576	1	2	25	30	4727	ENSSSCG00000026872,ENSSSCG00000027291	TNFSF13|-|
GO:0008889	glycerophosphodiester phosphodiesterase activity	molecular_function	0.010708	1	1	25	2	4727	ENSSSCG00000030262	GDPD1|
GO:0048298	positive regulation of isotype switching to IgA isotypes	biological_process	0.010709	1	1	25	2	4727	ENSSSCG00000026872	TNFSF13|
GO:0000075	cell cycle checkpoint	biological_process	0.010799	1	2	25	30	4727	ENSSSCG00000025851,ENSSSCG00000028283	-|-|
GO:0005125	cytokine activity	molecular_function	0.013166	1	2	25	34	4727	ENSSSCG00000027291,ENSSSCG00000026872	-|TNFSF13|
GO:0008209	androgen metabolic process	biological_process	0.015365	1	1	25	3	4727	ENSSSCG00000001476	HSD17B8|
GO:0016840	carbon-nitrogen lyase activity	molecular_function	0.015418	1	1	25	3	4727	ENSSSCG00000015332	-|
GO:0016843	amine-lyase activity	molecular_function	0.015418	1	1	25	3	4727	ENSSSCG00000015332	-|
GO:0016844	strictosidine synthase activity	molecular_function	0.015418	1	1	25	3	4727	ENSSSCG00000015332	-|
GO:0033276	transcription factor TFTC complex	cellular_component	0.015527	1	1	25	3	4727	ENSSSCG00000010597	TAF5|
GO:0002283	neutrophil activation involved in immune response	biological_process	0.015569	1	1	25	3	4727	ENSSSCG00000027291	-|
GO:0043312	neutrophil degranulation	biological_process	0.015569	1	1	25	3	4727	ENSSSCG00000027291	-|
GO:0000014	single-stranded DNA specific endodeoxyribonuclease activity	molecular_function	0.01567	1	1	25	3	4727	ENSSSCG00000025851	-|
GO:0030151	molybdenum ion binding	molecular_function	0.015764	1	1	25	3	4727	ENSSSCG00000000376	-|
GO:0042126	nitrate metabolic process	biological_process	0.015764	1	1	25	3	4727	ENSSSCG00000000376	-|
GO:2001057	reactive nitrogen species metabolic process	biological_process	0.015764	1	1	25	3	4727	ENSSSCG00000000376	-|
GO:0030894	replisome	cellular_component	0.015804	1	1	25	3	4727	ENSSSCG00000023216	-|
GO:0043601	nuclear replisome	cellular_component	0.015804	1	1	25	3	4727	ENSSSCG00000023216	-|
GO:0048290	isotype switching to IgA isotypes	biological_process	0.016004	1	1	25	3	4727	ENSSSCG00000026872	TNFSF13|
GO:0048296	regulation of isotype switching to IgA isotypes	biological_process	0.016004	1	1	25	3	4727	ENSSSCG00000026872	TNFSF13|
GO:1901988	negative regulation of cell cycle phase transition	biological_process	0.016125	1	2	25	37	4727	ENSSSCG00000028283,ENSSSCG00000025851	-|-|
GO:0003689	DNA clamp loader activity	molecular_function	0.016617	1	1	25	3	4727	ENSSSCG00000028283	-|
GO:0033170	protein-DNA loading ATPase activity	molecular_function	0.016617	1	1	25	3	4727	ENSSSCG00000028283	-|
GO:0071622	regulation of granulocyte chemotaxis	biological_process	0.020469	1	1	25	4	4727	ENSSSCG00000027291	-|
GO:0071624	positive regulation of granulocyte chemotaxis	biological_process	0.020469	1	1	25	4	4727	ENSSSCG00000027291	-|
GO:0090022	regulation of neutrophil chemotaxis	biological_process	0.020469	1	1	25	4	4727	ENSSSCG00000027291	-|
GO:0090023	positive regulation of neutrophil chemotaxis	biological_process	0.020469	1	1	25	4	4727	ENSSSCG00000027291	-|
GO:0005164	tumor necrosis factor receptor binding	molecular_function	0.020537	1	1	25	4	4727	ENSSSCG00000026872	TNFSF13|
GO:0080008	Cul4-RING ubiquitin ligase complex	cellular_component	0.020638	1	1	25	4	4727	ENSSSCG00000023216	-|
GO:0036230	granulocyte activation	biological_process	0.020691	1	1	25	4	4727	ENSSSCG00000027291	-|
GO:0042119	neutrophil activation	biological_process	0.020691	1	1	25	4	4727	ENSSSCG00000027291	-|
GO:0002443	leukocyte mediated immunity	biological_process	0.0207	1	2	25	43	4727	ENSSSCG00000026872,ENSSSCG00000027291	TNFSF13|-|
GO:0003954	NADH dehydrogenase activity	molecular_function	0.020744	1	1	25	4	4727	ENSSSCG00000016893	NDUFS4|
GO:0008137	NADH dehydrogenase (ubiquinone) activity	molecular_function	0.020744	1	1	25	4	4727	ENSSSCG00000016893	NDUFS4|
GO:0050136	NADH dehydrogenase (quinone) activity	molecular_function	0.020744	1	1	25	4	4727	ENSSSCG00000016893	NDUFS4|
GO:0045830	positive regulation of isotype switching	biological_process	0.020881	1	1	25	4	4727	ENSSSCG00000026872	TNFSF13|
GO:0045911	positive regulation of DNA recombination	biological_process	0.020881	1	1	25	4	4727	ENSSSCG00000026872	TNFSF13|
GO:0005126	cytokine receptor binding	molecular_function	0.021845	1	2	25	44	4727	ENSSSCG00000026872,ENSSSCG00000027291	TNFSF13|-|
GO:0010948	negative regulation of cell cycle process	biological_process	0.023286	1	2	25	45	4727	ENSSSCG00000028283,ENSSSCG00000025851	-|-|
GO:0034464	BBSome	cellular_component	0.023643	1	1	25	4	4727	ENSSSCG00000024754	-|
GO:0006974	response to DNA damage stimulus	biological_process	0.023709	1	3	25	118	4727	ENSSSCG00000025851,ENSSSCG00000028283,ENSSSCG00000021717	-|-|SUV39H1|
GO:0071011	precatalytic spliceosome	cellular_component	0.025522	1	1	25	5	4727	ENSSSCG00000023216	-|
GO:0016655	oxidoreductase activity, acting on NAD(P)H, quinone or similar compound as acceptor	molecular_function	0.025792	1	1	25	5	4727	ENSSSCG00000016893	NDUFS4|
GO:0005669	transcription factor TFIID complex	cellular_component	0.025794	1	1	25	5	4727	ENSSSCG00000010597	TAF5|
GO:0070301	cellular response to hydrogen peroxide	biological_process	0.025917	1	1	25	5	4727	ENSSSCG00000025910	ZNF277|
GO:0043596	nuclear replication fork	cellular_component	0.026116	1	1	25	5	4727	ENSSSCG00000023216	-|
GO:0045191	regulation of isotype switching	biological_process	0.026125	1	1	25	5	4727	ENSSSCG00000026872	TNFSF13|
GO:0044427	chromosomal part	cellular_component	0.026632	1	3	25	124	4727	ENSSSCG00000023216,ENSSSCG00000028283,ENSSSCG00000021717	-|-|SUV39H1|
GO:1901987	regulation of cell cycle phase transition	biological_process	0.030503	1	2	25	52	4727	ENSSSCG00000025851,ENSSSCG00000028283	-|-|
GO:0008508	bile acid:sodium symporter activity	molecular_function	0.030708	1	1	25	6	4727	ENSSSCG00000029434	SLC10A5|
GO:0015125	bile acid transmembrane transporter activity	molecular_function	0.030708	1	1	25	6	4727	ENSSSCG00000029434	SLC10A5|
GO:0033764	steroid dehydrogenase activity, acting on the CH-OH group of donors, NAD or NADP as acceptor	molecular_function	0.030733	1	1	25	6	4727	ENSSSCG00000001476	HSD17B8|
GO:0033108	mitochondrial respiratory chain complex assembly	biological_process	0.031011	1	1	25	6	4727	ENSSSCG00000016893	NDUFS4|
GO:0002712	regulation of B cell mediated immunity	biological_process	0.031693	1	1	25	6	4727	ENSSSCG00000026872	TNFSF13|
GO:0002889	regulation of immunoglobulin mediated immune response	biological_process	0.031693	1	1	25	6	4727	ENSSSCG00000026872	TNFSF13|
GO:0000118	histone deacetylase complex	cellular_component	0.031793	1	1	25	6	4727	ENSSSCG00000030118	SAP30|
GO:0046856	phosphatidylinositol dephosphorylation	biological_process	0.032231	1	1	25	6	4727	ENSSSCG00000025988	-|
GO:2000772	regulation of cellular senescence	biological_process	0.033484	1	1	25	6	4727	ENSSSCG00000025910	ZNF277|
GO:0005694	chromosome	cellular_component	0.035338	1	3	25	138	4727	ENSSSCG00000023216,ENSSSCG00000028283,ENSSSCG00000021717	-|-|SUV39H1|
GO:0015721	bile acid and bile salt transport	biological_process	0.035703	1	1	25	7	4727	ENSSSCG00000029434	SLC10A5|
GO:0002446	neutrophil mediated immunity	biological_process	0.035727	1	1	25	7	4727	ENSSSCG00000027291	-|
GO:0016229	steroid dehydrogenase activity	molecular_function	0.035789	1	1	25	7	4727	ENSSSCG00000001476	HSD17B8|
GO:0005747	mitochondrial respiratory chain complex I	cellular_component	0.03582	1	1	25	7	4727	ENSSSCG00000016893	NDUFS4|
GO:0030964	NADH dehydrogenase complex	cellular_component	0.03582	1	1	25	7	4727	ENSSSCG00000016893	NDUFS4|
GO:0045271	respiratory chain complex I	cellular_component	0.03582	1	1	25	7	4727	ENSSSCG00000016893	NDUFS4|
GO:0002637	regulation of immunoglobulin production	biological_process	0.03629	1	1	25	7	4727	ENSSSCG00000026872	TNFSF13|
GO:0042542	response to hydrogen peroxide	biological_process	0.036454	1	1	25	7	4727	ENSSSCG00000025910	ZNF277|
GO:0042446	hormone biosynthetic process	biological_process	0.036703	1	1	25	7	4727	ENSSSCG00000001476	HSD17B8|
GO:0032813	tumor necrosis factor receptor superfamily binding	molecular_function	0.040643	1	1	25	8	4727	ENSSSCG00000026872	TNFSF13|
GO:0044770	cell cycle phase transition	biological_process	0.040675	1	2	25	61	4727	ENSSSCG00000025851,ENSSSCG00000028283	-|-|
GO:0045236	CXCR chemokine receptor binding	molecular_function	0.040866	1	1	25	8	4727	ENSSSCG00000027291	-|
GO:0002204	somatic recombination of immunoglobulin genes involved in immune response	biological_process	0.041168	1	1	25	8	4727	ENSSSCG00000026872	TNFSF13|
GO:0002208	somatic diversification of immunoglobulins involved in immune response	biological_process	0.041168	1	1	25	8	4727	ENSSSCG00000026872	TNFSF13|
GO:0045190	isotype switching	biological_process	0.041168	1	1	25	8	4727	ENSSSCG00000026872	TNFSF13|
GO:0016311	dephosphorylation	biological_process	0.041323	1	2	25	61	4727	ENSSSCG00000025988,ENSSSCG00000015332	-|-|
GO:0000792	heterochromatin	cellular_component	0.041344	1	1	25	8	4727	ENSSSCG00000021717	SUV39H1|
GO:0071941	nitrogen cycle metabolic process	biological_process	0.0414	1	1	25	8	4727	ENSSSCG00000000376	-|
GO:0046839	phospholipid dephosphorylation	biological_process	0.042213	1	1	25	8	4727	ENSSSCG00000025988	-|
GO:0070461	SAGA-type complex	cellular_component	0.042844	1	1	25	8	4727	ENSSSCG00000010597	TAF5|
GO:0000018	regulation of DNA recombination	biological_process	0.0431	1	1	25	8	4727	ENSSSCG00000026872	TNFSF13|
GO:0090342	regulation of cell aging	biological_process	0.043601	1	1	25	8	4727	ENSSSCG00000025910	ZNF277|
GO:0033554	cellular response to stress	biological_process	0.043715	1	4	25	255	4727	ENSSSCG00000021717,ENSSSCG00000028283,ENSSSCG00000025851,ENSSSCG00000025910	SUV39H1|-|-|ZNF277|
GO:0006259	DNA metabolic process	biological_process	0.044775	1	3	25	152	4727	ENSSSCG00000026872,ENSSSCG00000025851,ENSSSCG00000028283	TNFSF13|-|-|
GO:0042578	phosphoric ester hydrolase activity	molecular_function	0.045911	1	2	25	65	4727	ENSSSCG00000030262,ENSSSCG00000015332	GDPD1|-|
GO:0000979	RNA polymerase II core promoter sequence-specific DNA binding	molecular_function	0.046466	1	1	25	9	4727	ENSSSCG00000025910	ZNF277|
GO:0016278	lysine N-methyltransferase activity	molecular_function	0.046479	1	1	25	9	4727	ENSSSCG00000021717	SUV39H1|
GO:0016279	protein-lysine N-methyltransferase activity	molecular_function	0.046479	1	1	25	9	4727	ENSSSCG00000021717	SUV39H1|
GO:0018024	histone-lysine N-methyltransferase activity	molecular_function	0.046479	1	1	25	9	4727	ENSSSCG00000021717	SUV39H1|
GO:0016445	somatic diversification of immunoglobulins	biological_process	0.046947	1	1	25	9	4727	ENSSSCG00000026872	TNFSF13|
GO:0016447	somatic recombination of immunoglobulin gene segments	biological_process	0.046947	1	1	25	9	4727	ENSSSCG00000026872	TNFSF13|
GO:0016491	oxidoreductase activity	molecular_function	0.048529	1	3	25	158	4727	ENSSSCG00000001476,ENSSSCG00000016893,ENSSSCG00000000376	HSD17B8|NDUFS4|-|
GO:0006342	chromatin silencing	biological_process	0.050844	1	1	25	10	4727	ENSSSCG00000021717	SUV39H1|
GO:0045814	negative regulation of gene expression, epigenetic	biological_process	0.050844	1	1	25	10	4727	ENSSSCG00000021717	SUV39H1|
GO:0002381	immunoglobulin production involved in immunoglobulin mediated immune response	biological_process	0.051001	1	1	25	10	4727	ENSSSCG00000026872	TNFSF13|
GO:0034614	cellular response to reactive oxygen species	biological_process	0.05112	1	1	25	10	4727	ENSSSCG00000025910	ZNF277|
GO:0034754	cellular hormone metabolic process	biological_process	0.051352	1	1	25	10	4727	ENSSSCG00000001476	HSD17B8|
GO:0002200	somatic diversification of immune receptors	biological_process	0.052115	1	1	25	10	4727	ENSSSCG00000026872	TNFSF13|
GO:0002562	somatic diversification of immune receptors via germline recombination within a single locus	biological_process	0.052115	1	1	25	10	4727	ENSSSCG00000026872	TNFSF13|
GO:0016444	somatic cell DNA recombination	biological_process	0.052115	1	1	25	10	4727	ENSSSCG00000026872	TNFSF13|
GO:0004520	endodeoxyribonuclease activity	molecular_function	0.052204	1	1	25	10	4727	ENSSSCG00000025851	-|
GO:0090398	cellular senescence	biological_process	0.053596	1	1	25	10	4727	ENSSSCG00000025910	ZNF277|
GO:0019933	cAMP-mediated signaling	biological_process	0.054378	1	1	25	10	4727	ENSSSCG00000016893	NDUFS4|
GO:0050871	positive regulation of B cell activation	biological_process	0.055839	1	1	25	11	4727	ENSSSCG00000026872	TNFSF13|
GO:0008028	monocarboxylic acid transmembrane transporter activity	molecular_function	0.055844	1	1	25	11	4727	ENSSSCG00000029434	SLC10A5|
GO:0043299	leukocyte degranulation	biological_process	0.055967	1	1	25	11	4727	ENSSSCG00000027291	-|
GO:0002275	myeloid cell activation involved in immune response	biological_process	0.056007	1	1	25	11	4727	ENSSSCG00000027291	-|
GO:0042054	histone methyltransferase activity	molecular_function	0.056388	1	1	25	11	4727	ENSSSCG00000021717	SUV39H1|
GO:0030593	neutrophil chemotaxis	biological_process	0.057119	1	1	25	11	4727	ENSSSCG00000027291	-|
GO:0016569	covalent chromatin modification	biological_process	0.057337	1	2	25	74	4727	ENSSSCG00000010597,ENSSSCG00000021717	TAF5|SUV39H1|
GO:0016570	histone modification	biological_process	0.057337	1	2	25	74	4727	ENSSSCG00000021717,ENSSSCG00000010597	SUV39H1|TAF5|
GO:1901700	response to oxygen-containing compound	biological_process	0.057897	1	3	25	167	4727	ENSSSCG00000025910,ENSSSCG00000016893,ENSSSCG00000027291	ZNF277|NDUFS4|-|
GO:0048146	positive regulation of fibroblast proliferation	biological_process	0.058254	1	1	25	11	4727	ENSSSCG00000016893	NDUFS4|
GO:0051591	response to cAMP	biological_process	0.06037	1	1	25	11	4727	ENSSSCG00000016893	NDUFS4|
GO:0008009	chemokine activity	molecular_function	0.060582	1	1	25	12	4727	ENSSSCG00000027291	-|
GO:0042379	chemokine receptor binding	molecular_function	0.060582	1	1	25	12	4727	ENSSSCG00000027291	-|
GO:0005746	mitochondrial respiratory chain	cellular_component	0.060677	1	1	25	12	4727	ENSSSCG00000016893	NDUFS4|
GO:0006367	transcription initiation from RNA polymerase II promoter	biological_process	0.06075	1	1	25	12	4727	ENSSSCG00000010597	TAF5|
GO:0045454	cell redox homeostasis	biological_process	0.060753	1	1	25	12	4727	ENSSSCG00000028543	-|
GO:0002312	B cell activation involved in immune response	biological_process	0.061492	1	1	25	12	4727	ENSSSCG00000026872	TNFSF13|
GO:0001046	core promoter sequence-specific DNA binding	molecular_function	0.061675	1	1	25	12	4727	ENSSSCG00000025910	ZNF277|
GO:0002706	regulation of lymphocyte mediated immunity	biological_process	0.061824	1	1	25	12	4727	ENSSSCG00000026872	TNFSF13|
GO:0002822	regulation of adaptive immune response based on somatic recombination of immune receptors built from immunoglobulin superfamily domains	biological_process	0.061943	1	1	25	12	4727	ENSSSCG00000026872	TNFSF13|
GO:0006281	DNA repair	biological_process	0.062256	1	2	25	77	4727	ENSSSCG00000025851,ENSSSCG00000028283	-|-|
GO:0006629	lipid metabolic process	biological_process	0.06298	1	3	25	175	4727	ENSSSCG00000001476,ENSSSCG00000025988,ENSSSCG00000030262	HSD17B8|-|GDPD1|
GO:0048144	fibroblast proliferation	biological_process	0.063108	1	1	25	12	4727	ENSSSCG00000016893	NDUFS4|
GO:0048145	regulation of fibroblast proliferation	biological_process	0.063108	1	1	25	12	4727	ENSSSCG00000016893	NDUFS4|
GO:0002690	positive regulation of leukocyte chemotaxis	biological_process	0.065461	1	1	25	13	4727	ENSSSCG00000027291	-|
GO:0002444	myeloid leukocyte mediated immunity	biological_process	0.065661	1	1	25	13	4727	ENSSSCG00000027291	-|
GO:0005343	organic acid:sodium symporter activity	molecular_function	0.065787	1	1	25	13	4727	ENSSSCG00000029434	SLC10A5|
GO:0050864	regulation of B cell activation	biological_process	0.065851	1	1	25	13	4727	ENSSSCG00000026872	TNFSF13|
GO:0005811	lipid particle	cellular_component	0.065855	1	1	25	13	4727	ENSSSCG00000016449	GIMAP2|
GO:0016651	oxidoreductase activity, acting on NAD(P)H	molecular_function	0.066021	1	1	25	13	4727	ENSSSCG00000016893	NDUFS4|
GO:0019935	cyclic-nucleotide-mediated signaling	biological_process	0.066443	1	1	25	12	4727	ENSSSCG00000016893	NDUFS4|
GO:0004402	histone acetyltransferase activity	molecular_function	0.066641	1	1	25	13	4727	ENSSSCG00000010597	TAF5|
GO:0002819	regulation of adaptive immune response	biological_process	0.066935	1	1	25	13	4727	ENSSSCG00000026872	TNFSF13|
GO:0005740	mitochondrial envelope	cellular_component	0.070027	1	2	25	83	4727	ENSSSCG00000001476,ENSSSCG00000016893	HSD17B8|NDUFS4|
GO:0034968	histone lysine methylation	biological_process	0.071466	1	1	25	14	4727	ENSSSCG00000021717	SUV39H1|
GO:0055114	oxidation-reduction process	biological_process	0.071875	1	3	25	185	4727	ENSSSCG00000001476,ENSSSCG00000016893,ENSSSCG00000000376	HSD17B8|NDUFS4|-|
GO:0005657	replication fork	cellular_component	0.073128	1	1	25	14	4727	ENSSSCG00000023216	-|
GO:0045321	leukocyte activation	biological_process	0.073178	1	2	25	85	4727	ENSSSCG00000027291,ENSSSCG00000026872	-|TNFSF13|
GO:0007569	cell aging	biological_process	0.073445	1	1	25	14	4727	ENSSSCG00000025910	ZNF277|
GO:0070098	chemokine-mediated signaling pathway	biological_process	0.0752	1	1	25	15	4727	ENSSSCG00000027291	-|
GO:0002688	regulation of leukocyte chemotaxis	biological_process	0.075345	1	1	25	15	4727	ENSSSCG00000027291	-|
GO:0070469	respiratory chain	cellular_component	0.075728	1	1	25	15	4727	ENSSSCG00000016893	NDUFS4|
GO:0016064	immunoglobulin mediated immune response	biological_process	0.075824	1	1	25	15	4727	ENSSSCG00000026872	TNFSF13|
GO:0002700	regulation of production of molecular mediator of immune response	biological_process	0.075948	1	1	25	15	4727	ENSSSCG00000026872	TNFSF13|
GO:0000302	response to reactive oxygen species	biological_process	0.076425	1	1	25	15	4727	ENSSSCG00000025910	ZNF277|
GO:0071621	granulocyte chemotaxis	biological_process	0.076553	1	1	25	15	4727	ENSSSCG00000027291	-|
GO:0022900	electron transport chain	biological_process	0.076994	1	1	25	15	4727	ENSSSCG00000016893	NDUFS4|
GO:0047485	protein N-terminus binding	molecular_function	0.077435	1	1	25	15	4727	ENSSSCG00000021717	SUV39H1|
GO:0005615	extracellular space	cellular_component	0.077746	1	3	25	192	4727	ENSSSCG00000015332,ENSSSCG00000026872,ENSSSCG00000027291	-|TNFSF13|-|
GO:0010564	regulation of cell cycle process	biological_process	0.077757	1	2	25	88	4727	ENSSSCG00000028283,ENSSSCG00000025851	-|-|
GO:0036294	cellular response to decreased oxygen levels	biological_process	0.07827	1	1	25	15	4727	ENSSSCG00000021717	SUV39H1|
GO:0071456	cellular response to hypoxia	biological_process	0.07827	1	1	25	15	4727	ENSSSCG00000021717	SUV39H1|
GO:0015718	monocarboxylic acid transport	biological_process	0.080144	1	1	25	16	4727	ENSSSCG00000029434	SLC10A5|
GO:0005759	mitochondrial matrix	cellular_component	0.080243	1	1	25	16	4727	ENSSSCG00000001476	HSD17B8|
GO:0045055	regulated secretory pathway	biological_process	0.080532	1	1	25	16	4727	ENSSSCG00000027291	-|
GO:0019724	B cell mediated immunity	biological_process	0.080697	1	1	25	16	4727	ENSSSCG00000026872	TNFSF13|
GO:0008276	protein methyltransferase activity	molecular_function	0.080721	1	1	25	16	4727	ENSSSCG00000021717	SUV39H1|
GO:0002703	regulation of leukocyte mediated immunity	biological_process	0.081151	1	1	25	16	4727	ENSSSCG00000026872	TNFSF13|
GO:0004536	deoxyribonuclease activity	molecular_function	0.081751	1	1	25	16	4727	ENSSSCG00000025851	-|
GO:0016568	chromatin modification	biological_process	0.084108	1	2	25	92	4727	ENSSSCG00000010597,ENSSSCG00000021717	TAF5|SUV39H1|
GO:0008152	metabolic process	biological_process	0.084949	1	16	25	2280	4727	ENSSSCG00000021717,ENSSSCG00000030262,ENSSSCG00000000376,ENSSSCG00000025988,ENSSSCG00000010597,ENSSSCG00000012000,ENSSSCG00000016893,ENSSSCG00000026872,ENSSSCG00000025851,ENSSSCG00000020848,ENSSSCG00000023216,ENSSSCG00000001476,ENSSSCG00000028283,ENSSSCG00000030118,ENSSSCG00000027073,ENSSSCG00000015332	SUV39H1|GDPD1|-|-|TAF5|-|NDUFS4|TNFSF13|-|CMBL|-|HSD17B8|-|SAP30|-|-|
GO:0002687	positive regulation of leukocyte migration	biological_process	0.085138	1	1	25	17	4727	ENSSSCG00000027291	-|
GO:0002252	immune effector process	biological_process	0.085258	1	2	25	93	4727	ENSSSCG00000026872,ENSSSCG00000027291	TNFSF13|-|
GO:0016591	DNA-directed RNA polymerase II, holoenzyme	cellular_component	0.085327	1	1	25	17	4727	ENSSSCG00000010597	TAF5|
GO:0001047	core promoter binding	molecular_function	0.085938	1	1	25	17	4727	ENSSSCG00000025910	ZNF277|
GO:0044429	mitochondrial part	cellular_component	0.086733	1	2	25	94	4727	ENSSSCG00000001476,ENSSSCG00000016893	HSD17B8|NDUFS4|
GO:0008080	N-acetyltransferase activity	molecular_function	0.086759	1	1	25	17	4727	ENSSSCG00000010597	TAF5|
GO:0048520	positive regulation of behavior	biological_process	0.086954	1	1	25	17	4727	ENSSSCG00000027291	-|
GO:0050921	positive regulation of chemotaxis	biological_process	0.086954	1	1	25	17	4727	ENSSSCG00000027291	-|
GO:0071453	cellular response to oxygen levels	biological_process	0.087997	1	1	25	17	4727	ENSSSCG00000021717	SUV39H1|
GO:0014074	response to purine-containing compound	biological_process	0.09012	1	1	25	17	4727	ENSSSCG00000016893	NDUFS4|
GO:0015370	solute:sodium symporter activity	molecular_function	0.090169	1	1	25	18	4727	ENSSSCG00000029434	SLC10A5|
GO:0043234	protein complex	cellular_component	0.090173	1	7	25	750	4727	ENSSSCG00000023216,ENSSSCG00000030118,ENSSSCG00000024754,ENSSSCG00000028283,ENSSSCG00000010597,ENSSSCG00000016893,ENSSSCG00000021717	-|SAP30|-|-|TAF5|NDUFS4|SUV39H1|
GO:0016571	histone methylation	biological_process	0.090697	1	1	25	18	4727	ENSSSCG00000021717	SUV39H1|
GO:0071704	organic substance metabolic process	biological_process	0.090995	1	14	25	1928	4727	ENSSSCG00000000376,ENSSSCG00000010597,ENSSSCG00000025988,ENSSSCG00000021717,ENSSSCG00000030262,ENSSSCG00000001476,ENSSSCG00000012000,ENSSSCG00000026872,ENSSSCG00000016893,ENSSSCG00000020848,ENSSSCG00000030118,ENSSSCG00000023216,ENSSSCG00000025851,ENSSSCG00000028283	-|TAF5|-|SUV39H1|GDPD1|HSD17B8|-|TNFSF13|NDUFS4|CMBL|SAP30|-|-|-|
GO:0005576	extracellular region	cellular_component	0.09392	1	6	25	611	4727	ENSSSCG00000027291,ENSSSCG00000026872,ENSSSCG00000015332,ENSSSCG00000020848,ENSSSCG00000027073,ENSSSCG00000025463	-|TNFSF13|-|CMBL|-|-|
GO:0035914	skeletal muscle cell differentiation	biological_process	0.095155	1	1	25	19	4727	ENSSSCG00000030118	SAP30|
GO:0016458	gene silencing	biological_process	0.095174	1	1	25	19	4727	ENSSSCG00000021717	SUV39H1|
GO:0046683	response to organophosphorus	biological_process	0.095462	1	1	25	18	4727	ENSSSCG00000016893	NDUFS4|
GO:0008170	N-methyltransferase activity	molecular_function	0.096127	1	1	25	19	4727	ENSSSCG00000021717	SUV39H1|
GO:0002684	positive regulation of immune system process	biological_process	0.099093	1	2	25	102	4727	ENSSSCG00000027291,ENSSSCG00000026872	-|TNFSF13|
GO:0002699	positive regulation of immune effector process	biological_process	0.1001	1	1	25	20	4727	ENSSSCG00000026872	TNFSF13|
GO:0034599	cellular response to oxidative stress	biological_process	0.1003	1	1	25	20	4727	ENSSSCG00000025910	ZNF277|
GO:0006950	response to stress	biological_process	0.10058	1	5	25	476	4727	ENSSSCG00000025910,ENSSSCG00000028283,ENSSSCG00000025851,ENSSSCG00000027291,ENSSSCG00000021717	ZNF277|-|-|-|SUV39H1|
GO:0007568	aging	biological_process	0.10246	1	1	25	20	4727	ENSSSCG00000025910	ZNF277|
GO:0008094	DNA-dependent ATPase activity	molecular_function	0.10316	1	1	25	20	4727	ENSSSCG00000028283	-|
GO:0016616	oxidoreductase activity, acting on the CH-OH group of donors, NAD or NADP as acceptor	molecular_function	0.10405	1	1	25	21	4727	ENSSSCG00000001476	HSD17B8|
GO:0046488	phosphatidylinositol metabolic process	biological_process	0.10489	1	1	25	21	4727	ENSSSCG00000025988	-|
GO:0002285	lymphocyte activation involved in immune response	biological_process	0.10511	1	1	25	21	4727	ENSSSCG00000026872	TNFSF13|
GO:0042445	hormone metabolic process	biological_process	0.10566	1	1	25	21	4727	ENSSSCG00000001476	HSD17B8|
GO:0008081	phosphoric diester hydrolase activity	molecular_function	0.10599	1	1	25	21	4727	ENSSSCG00000030262	GDPD1|
GO:0000428	DNA-directed RNA polymerase complex	cellular_component	0.10886	1	1	25	22	4727	ENSSSCG00000010597	TAF5|
GO:0030880	RNA polymerase complex	cellular_component	0.10886	1	1	25	22	4727	ENSSSCG00000010597	TAF5|
GO:0055029	nuclear DNA-directed RNA polymerase complex	cellular_component	0.10886	1	1	25	22	4727	ENSSSCG00000010597	TAF5|
GO:0016407	acetyltransferase activity	molecular_function	0.11073	1	1	25	22	4727	ENSSSCG00000010597	TAF5|
GO:0000122	negative regulation of transcription from RNA polymerase II promoter	biological_process	0.11137	1	2	25	108	4727	ENSSSCG00000030118,ENSSSCG00000021717	SAP30|SUV39H1|
GO:0002274	myeloid leukocyte activation	biological_process	0.11527	1	1	25	23	4727	ENSSSCG00000027291	-|
GO:0005319	lipid transporter activity	molecular_function	0.11582	1	1	25	23	4727	ENSSSCG00000029434	SLC10A5|
GO:0051054	positive regulation of DNA metabolic process	biological_process	0.11595	1	1	25	23	4727	ENSSSCG00000026872	TNFSF13|
GO:0001775	cell activation	biological_process	0.11795	1	2	25	112	4727	ENSSSCG00000027291,ENSSSCG00000026872	-|TNFSF13|
GO:0006325	chromatin organization	biological_process	0.11806	1	2	25	113	4727	ENSSSCG00000010597,ENSSSCG00000021717	TAF5|SUV39H1|
GO:0002685	regulation of leukocyte migration	biological_process	0.11855	1	1	25	24	4727	ENSSSCG00000027291	-|
GO:0072593	reactive oxygen species metabolic process	biological_process	0.1191	1	1	25	24	4727	ENSSSCG00000016893	NDUFS4|
GO:0016410	N-acyltransferase activity	molecular_function	0.1196	1	1	25	24	4727	ENSSSCG00000010597	TAF5|
GO:0006694	steroid biosynthetic process	biological_process	0.11986	1	1	25	24	4727	ENSSSCG00000001476	HSD17B8|
GO:0001666	response to hypoxia	biological_process	0.12117	1	1	25	24	4727	ENSSSCG00000021717	SUV39H1|
GO:0036293	response to decreased oxygen levels	biological_process	0.12117	1	1	25	24	4727	ENSSSCG00000021717	SUV39H1|
GO:0050920	regulation of chemotaxis	biological_process	0.1214	1	1	25	24	4727	ENSSSCG00000027291	-|
GO:0000123	histone acetyltransferase complex	cellular_component	0.12148	1	1	25	24	4727	ENSSSCG00000010597	TAF5|
GO:0006352	DNA-dependent transcription, initiation	biological_process	0.12255	1	1	25	25	4727	ENSSSCG00000010597	TAF5|
GO:0006479	protein methylation	biological_process	0.12343	1	1	25	25	4727	ENSSSCG00000021717	SUV39H1|
GO:0008213	protein alkylation	biological_process	0.12343	1	1	25	25	4727	ENSSSCG00000021717	SUV39H1|
GO:0071013	catalytic step 2 spliceosome	cellular_component	0.12346	1	1	25	25	4727	ENSSSCG00000023216	-|
GO:0040029	regulation of gene expression, epigenetic	biological_process	0.12364	1	1	25	25	4727	ENSSSCG00000021717	SUV39H1|
GO:0045333	cellular respiration	biological_process	0.12432	1	1	25	25	4727	ENSSSCG00000016893	NDUFS4|
GO:0003714	transcription corepressor activity	molecular_function	0.125	1	1	25	25	4727	ENSSSCG00000030118	SAP30|
GO:0070482	response to oxygen levels	biological_process	0.12581	1	1	25	25	4727	ENSSSCG00000021717	SUV39H1|
GO:0008757	S-adenosylmethionine-dependent methyltransferase activity	molecular_function	0.12883	1	1	25	26	4727	ENSSSCG00000021717	SUV39H1|
GO:0016614	oxidoreductase activity, acting on CH-OH group of donors	molecular_function	0.12888	1	1	25	26	4727	ENSSSCG00000001476	HSD17B8|
GO:0042113	B cell activation	biological_process	0.12921	1	1	25	26	4727	ENSSSCG00000026872	TNFSF13|
GO:0019932	second-messenger-mediated signaling	biological_process	0.12964	1	1	25	25	4727	ENSSSCG00000016893	NDUFS4|
GO:0090304	nucleic acid metabolic process	biological_process	0.12998	1	7	25	824	4727	ENSSSCG00000026872,ENSSSCG00000021717,ENSSSCG00000010597,ENSSSCG00000025851,ENSSSCG00000028283,ENSSSCG00000030118,ENSSSCG00000023216	TNFSF13|SUV39H1|TAF5|-|-|SAP30|-|
GO:0044212	transcription regulatory region DNA binding	molecular_function	0.13327	1	2	25	121	4727	ENSSSCG00000025910,ENSSSCG00000010597	ZNF277|TAF5|
GO:0000975	regulatory region DNA binding	molecular_function	0.13677	1	2	25	123	4727	ENSSSCG00000010597,ENSSSCG00000025910	TAF5|ZNF277|
GO:0001067	regulatory region nucleic acid binding	molecular_function	0.13677	1	2	25	123	4727	ENSSSCG00000025910,ENSSSCG00000010597	ZNF277|TAF5|
GO:0002377	immunoglobulin production	biological_process	0.13776	1	1	25	28	4727	ENSSSCG00000026872	TNFSF13|
GO:0050795	regulation of behavior	biological_process	0.13954	1	1	25	28	4727	ENSSSCG00000027291	-|
GO:0044455	mitochondrial membrane part	cellular_component	0.14105	1	1	25	29	4727	ENSSSCG00000016893	NDUFS4|
GO:0016829	lyase activity	molecular_function	0.14338	1	1	25	29	4727	ENSSSCG00000015332	-|
GO:0032103	positive regulation of response to external stimulus	biological_process	0.14687	1	1	25	30	4727	ENSSSCG00000027291	-|
GO:0046943	carboxylic acid transmembrane transporter activity	molecular_function	0.1475	1	1	25	30	4727	ENSSSCG00000029434	SLC10A5|
GO:0032993	protein-DNA complex	cellular_component	0.14977	1	1	25	31	4727	ENSSSCG00000023216	-|
GO:0015293	symporter activity	molecular_function	0.1502	1	1	25	31	4727	ENSSSCG00000029434	SLC10A5|
GO:0015294	solute:cation symporter activity	molecular_function	0.1502	1	1	25	31	4727	ENSSSCG00000029434	SLC10A5|
GO:0002449	lymphocyte mediated immunity	biological_process	0.15038	1	1	25	31	4727	ENSSSCG00000026872	TNFSF13|
GO:0002460	adaptive immune response based on somatic recombination of immune receptors built from immunoglobulin superfamily domains	biological_process	0.15079	1	1	25	31	4727	ENSSSCG00000026872	TNFSF13|
GO:0030595	leukocyte chemotaxis	biological_process	0.15098	1	1	25	31	4727	ENSSSCG00000027291	-|
GO:0044238	primary metabolic process	biological_process	0.15118	1	13	25	1884	4727	ENSSSCG00000012000,ENSSSCG00000001476,ENSSSCG00000021717,ENSSSCG00000030262,ENSSSCG00000025988,ENSSSCG00000010597,ENSSSCG00000028283,ENSSSCG00000025851,ENSSSCG00000023216,ENSSSCG00000020848,ENSSSCG00000030118,ENSSSCG00000016893,ENSSSCG00000026872	-|HSD17B8|SUV39H1|GDPD1|-|TAF5|-|-|-|CMBL|SAP30|NDUFS4|TNFSF13|
GO:0005342	organic acid transmembrane transporter activity	molecular_function	0.15204	1	1	25	31	4727	ENSSSCG00000029434	SLC10A5|
GO:0004519	endonuclease activity	molecular_function	0.1567	1	1	25	32	4727	ENSSSCG00000025851	-|
GO:0004553	hydrolase activity, hydrolyzing O-glycosyl compounds	molecular_function	0.15746	1	1	25	32	4727	ENSSSCG00000012000	-|
GO:0051251	positive regulation of lymphocyte activation	biological_process	0.15963	1	1	25	33	4727	ENSSSCG00000026872	TNFSF13|
GO:0031967	organelle envelope	cellular_component	0.16206	1	2	25	137	4727	ENSSSCG00000016893,ENSSSCG00000001476	NDUFS4|HSD17B8|
GO:0031975	envelope	cellular_component	0.16206	1	2	25	137	4727	ENSSSCG00000016893,ENSSSCG00000001476	NDUFS4|HSD17B8|
GO:0016573	histone acetylation	biological_process	0.16237	1	1	25	33	4727	ENSSSCG00000010597	TAF5|
GO:0018393	internal peptidyl-lysine acetylation	biological_process	0.16237	1	1	25	33	4727	ENSSSCG00000010597	TAF5|
GO:0020037	heme binding	molecular_function	0.1657	1	1	25	34	4727	ENSSSCG00000000376	-|
GO:0018394	peptidyl-lysine acetylation	biological_process	0.16672	1	1	25	34	4727	ENSSSCG00000010597	TAF5|
GO:0006475	internal protein amino acid acetylation	biological_process	0.1675	1	1	25	34	4727	ENSSSCG00000010597	TAF5|
GO:0051726	regulation of cell cycle	biological_process	0.16865	1	2	25	140	4727	ENSSSCG00000028283,ENSSSCG00000025851	-|-|
GO:0008202	steroid metabolic process	biological_process	0.17004	1	1	25	35	4727	ENSSSCG00000001476	HSD17B8|
GO:0031461	cullin-RING ubiquitin ligase complex	cellular_component	0.17173	1	1	25	35	4727	ENSSSCG00000023216	-|
GO:0042384	cilium assembly	biological_process	0.172	1	1	25	34	4727	ENSSSCG00000024754	-|
GO:0044451	nucleoplasm part	cellular_component	0.17276	1	2	25	142	4727	ENSSSCG00000010597,ENSSSCG00000030118	TAF5|SAP30|
GO:0002696	positive regulation of leukocyte activation	biological_process	0.17313	1	1	25	36	4727	ENSSSCG00000026872	TNFSF13|
GO:0046906	tetrapyrrole binding	molecular_function	0.17437	1	1	25	36	4727	ENSSSCG00000000376	-|
GO:0016798	hydrolase activity, acting on glycosyl bonds	molecular_function	0.1754	1	1	25	36	4727	ENSSSCG00000012000	-|
GO:0060326	cell chemotaxis	biological_process	0.1775	1	1	25	37	4727	ENSSSCG00000027291	-|
GO:0030258	lipid modification	biological_process	0.17838	1	1	25	37	4727	ENSSSCG00000025988	-|
GO:0008514	organic anion transmembrane transporter activity	molecular_function	0.17881	1	1	25	37	4727	ENSSSCG00000029434	SLC10A5|
GO:0032991	macromolecular complex	cellular_component	0.1809	1	7	25	895	4727	ENSSSCG00000024754,ENSSSCG00000030118,ENSSSCG00000023216,ENSSSCG00000028283,ENSSSCG00000010597,ENSSSCG00000021717,ENSSSCG00000016893	-|SAP30|-|-|TAF5|SUV39H1|NDUFS4|
GO:0005681	spliceosomal complex	cellular_component	0.1813	1	1	25	38	4727	ENSSSCG00000023216	-|
GO:0006650	glycerophospholipid metabolic process	biological_process	0.18136	1	1	25	38	4727	ENSSSCG00000025988	-|
GO:1901360	organic cyclic compound metabolic process	biological_process	0.18198	1	8	25	1061	4727	ENSSSCG00000028283,ENSSSCG00000025851,ENSSSCG00000023216,ENSSSCG00000030118,ENSSSCG00000026872,ENSSSCG00000001476,ENSSSCG00000021717,ENSSSCG00000010597	-|-|-|SAP30|TNFSF13|HSD17B8|SUV39H1|TAF5|
GO:0002250	adaptive immune response	biological_process	0.18228	1	1	25	38	4727	ENSSSCG00000026872	TNFSF13|
GO:0015980	energy derivation by oxidation of organic compounds	biological_process	0.184	1	1	25	38	4727	ENSSSCG00000016893	NDUFS4|
GO:0006473	protein acetylation	biological_process	0.1856	1	1	25	38	4727	ENSSSCG00000010597	TAF5|
GO:0050867	positive regulation of cell activation	biological_process	0.18637	1	1	25	39	4727	ENSSSCG00000026872	TNFSF13|
GO:0006979	response to oxidative stress	biological_process	0.18722	1	1	25	39	4727	ENSSSCG00000025910	ZNF277|
GO:0015849	organic acid transport	biological_process	0.18743	1	1	25	39	4727	ENSSSCG00000029434	SLC10A5|
GO:0046942	carboxylic acid transport	biological_process	0.18743	1	1	25	39	4727	ENSSSCG00000029434	SLC10A5|
GO:0015081	sodium ion transmembrane transporter activity	molecular_function	0.1888	1	1	25	39	4727	ENSSSCG00000029434	SLC10A5|
GO:0044710	single-organism metabolic process	biological_process	0.18921	1	5	25	581	4727	ENSSSCG00000001476,ENSSSCG00000030262,ENSSSCG00000016893,ENSSSCG00000000376,ENSSSCG00000025988	HSD17B8|GDPD1|NDUFS4|-|-|
GO:0000375	RNA splicing, via transesterification reactions	biological_process	0.18941	1	1	25	40	4727	ENSSSCG00000023216	-|
GO:0000377	RNA splicing, via transesterification reactions with bulged adenosine as nucleophile	biological_process	0.18941	1	1	25	40	4727	ENSSSCG00000023216	-|
GO:0000398	mRNA splicing, via spliceosome	biological_process	0.18941	1	1	25	40	4727	ENSSSCG00000023216	-|
GO:0044782	cilium organization	biological_process	0.18973	1	1	25	38	4727	ENSSSCG00000024754	-|
GO:0043543	protein acylation	biological_process	0.18987	1	1	25	39	4727	ENSSSCG00000010597	TAF5|
GO:0051249	regulation of lymphocyte activation	biological_process	0.18998	1	1	25	40	4727	ENSSSCG00000026872	TNFSF13|
GO:0002440	production of molecular mediator of immune response	biological_process	0.19082	1	1	25	40	4727	ENSSSCG00000026872	TNFSF13|
GO:0032496	response to lipopolysaccharide	biological_process	0.19228	1	1	25	40	4727	ENSSSCG00000027291	-|
GO:0018205	peptidyl-lysine modification	biological_process	0.19348	1	1	25	40	4727	ENSSSCG00000010597	TAF5|
GO:0060271	cilium morphogenesis	biological_process	0.19407	1	1	25	39	4727	ENSSSCG00000024754	-|
GO:0010035	response to inorganic substance	biological_process	0.19431	1	1	25	40	4727	ENSSSCG00000025910	ZNF277|
GO:0043414	macromolecule methylation	biological_process	0.19553	1	1	25	41	4727	ENSSSCG00000021717	SUV39H1|
GO:0016747	transferase activity, transferring acyl groups other than amino-acyl groups	molecular_function	0.19926	1	1	25	42	4727	ENSSSCG00000010597	TAF5|
GO:0045892	negative regulation of transcription, DNA-dependent	biological_process	0.20295	1	2	25	158	4727	ENSSSCG00000030118,ENSSSCG00000021717	SAP30|SUV39H1|
GO:0002237	response to molecule of bacterial origin	biological_process	0.20489	1	1	25	43	4727	ENSSSCG00000027291	-|
GO:0016791	phosphatase activity	molecular_function	0.20543	1	1	25	43	4727	ENSSSCG00000015332	-|
GO:0006310	DNA recombination	biological_process	0.20658	1	1	25	43	4727	ENSSSCG00000026872	TNFSF13|
GO:0051276	chromosome organization	biological_process	0.20767	1	2	25	161	4727	ENSSSCG00000010597,ENSSSCG00000021717	TAF5|SUV39H1|
GO:0007519	skeletal muscle tissue development	biological_process	0.20793	1	1	25	44	4727	ENSSSCG00000030118	SAP30|
GO:0002682	regulation of immune system process	biological_process	0.20801	1	2	25	161	4727	ENSSSCG00000027291,ENSSSCG00000026872	-|TNFSF13|
GO:0051052	regulation of DNA metabolic process	biological_process	0.20998	1	1	25	44	4727	ENSSSCG00000026872	TNFSF13|
GO:0006644	phospholipid metabolic process	biological_process	0.21145	1	1	25	45	4727	ENSSSCG00000025988	-|
GO:0050900	leukocyte migration	biological_process	0.21211	1	1	25	45	4727	ENSSSCG00000027291	-|
GO:0060538	skeletal muscle organ development	biological_process	0.21215	1	1	25	45	4727	ENSSSCG00000030118	SAP30|
GO:0006091	generation of precursor metabolites and energy	biological_process	0.21399	1	1	25	45	4727	ENSSSCG00000016893	NDUFS4|
GO:0046486	glycerolipid metabolic process	biological_process	0.21543	1	1	25	46	4727	ENSSSCG00000025988	-|
GO:0002694	regulation of leukocyte activation	biological_process	0.21628	1	1	25	46	4727	ENSSSCG00000026872	TNFSF13|
GO:0008168	methyltransferase activity	molecular_function	0.2166	1	1	25	46	4727	ENSSSCG00000021717	SUV39H1|
GO:0042221	response to chemical stimulus	biological_process	0.21723	1	6	25	781	4727	ENSSSCG00000021717,ENSSSCG00000016893,ENSSSCG00000027291,ENSSSCG00000027073,ENSSSCG00000015332,ENSSSCG00000025910	SUV39H1|NDUFS4|-|-|-|ZNF277|
GO:0051253	negative regulation of RNA metabolic process	biological_process	0.21869	1	2	25	166	4727	ENSSSCG00000030118,ENSSSCG00000021717	SAP30|SUV39H1|
GO:0005667	transcription factor complex	cellular_component	0.21891	1	1	25	46	4727	ENSSSCG00000010597	TAF5|
GO:0002697	regulation of immune effector process	biological_process	0.22235	1	1	25	47	4727	ENSSSCG00000026872	TNFSF13|
GO:0016741	transferase activity, transferring one-carbon groups	molecular_function	0.22476	1	1	25	48	4727	ENSSSCG00000021717	SUV39H1|
GO:0001664	G-protein coupled receptor binding	molecular_function	0.22494	1	1	25	48	4727	ENSSSCG00000027291	-|
GO:2000113	negative regulation of cellular macromolecule biosynthetic process	biological_process	0.22687	1	2	25	170	4727	ENSSSCG00000021717,ENSSSCG00000030118	SUV39H1|SAP30|
GO:0004518	nuclease activity	molecular_function	0.22708	1	1	25	48	4727	ENSSSCG00000025851	-|
GO:0000151	ubiquitin ligase complex	cellular_component	0.22724	1	1	25	48	4727	ENSSSCG00000023216	-|
GO:0010927	cellular component assembly involved in morphogenesis	biological_process	0.2278	1	1	25	47	4727	ENSSSCG00000024754	-|
GO:0044237	cellular metabolic process	biological_process	0.22918	1	12	25	1832	4727	ENSSSCG00000021717,ENSSSCG00000025988,ENSSSCG00000010597,ENSSSCG00000000376,ENSSSCG00000001476,ENSSSCG00000026872,ENSSSCG00000016893,ENSSSCG00000028283,ENSSSCG00000025851,ENSSSCG00000023216,ENSSSCG00000015332,ENSSSCG00000030118	SUV39H1|-|TAF5|-|HSD17B8|TNFSF13|NDUFS4|-|-|-|-|SAP30|
GO:0006807	nitrogen compound metabolic process	biological_process	0.23223	1	8	25	1128	4727	ENSSSCG00000026872,ENSSSCG00000030118,ENSSSCG00000023216,ENSSSCG00000025851,ENSSSCG00000028283,ENSSSCG00000000376,ENSSSCG00000010597,ENSSSCG00000021717	TNFSF13|SAP30|-|-|-|-|TAF5|SUV39H1|
GO:0010558	negative regulation of macromolecule biosynthetic process	biological_process	0.23288	1	2	25	173	4727	ENSSSCG00000030118,ENSSSCG00000021717	SAP30|SUV39H1|
GO:0008380	RNA splicing	biological_process	0.23568	1	1	25	51	4727	ENSSSCG00000023216	-|
GO:0022402	cell cycle process	biological_process	0.23621	1	2	25	175	4727	ENSSSCG00000028283,ENSSSCG00000025851	-|-|
GO:0030335	positive regulation of cell migration	biological_process	0.2369	1	1	25	51	4727	ENSSSCG00000027291	-|
GO:0015291	secondary active transmembrane transporter activity	molecular_function	0.2373	1	1	25	51	4727	ENSSSCG00000029434	SLC10A5|
GO:0010629	negative regulation of gene expression	biological_process	0.23811	1	2	25	176	4727	ENSSSCG00000021717,ENSSSCG00000030118	SUV39H1|SAP30|
GO:0051146	striated muscle cell differentiation	biological_process	0.2404	1	1	25	52	4727	ENSSSCG00000030118	SAP30|
GO:0016746	transferase activity, transferring acyl groups	molecular_function	0.24421	1	1	25	53	4727	ENSSSCG00000010597	TAF5|
GO:0008236	serine-type peptidase activity	molecular_function	0.24737	1	1	25	54	4727	ENSSSCG00000020848	CMBL|
GO:0017171	serine hydrolase activity	molecular_function	0.24737	1	1	25	54	4727	ENSSSCG00000020848	CMBL|
GO:0050865	regulation of cell activation	biological_process	0.2475	1	1	25	53	4727	ENSSSCG00000026872	TNFSF13|
GO:0070887	cellular response to chemical stimulus	biological_process	0.24965	1	3	25	324	4727	ENSSSCG00000021717,ENSSSCG00000027291,ENSSSCG00000025910	SUV39H1|-|ZNF277|
GO:0006366	transcription from RNA polymerase II promoter	biological_process	0.25076	1	3	25	328	4727	ENSSSCG00000030118,ENSSSCG00000010597,ENSSSCG00000021717	SAP30|TAF5|SUV39H1|
GO:0051272	positive regulation of cellular component movement	biological_process	0.25263	1	1	25	55	4727	ENSSSCG00000027291	-|
GO:2000147	positive regulation of cell motility	biological_process	0.25263	1	1	25	55	4727	ENSSSCG00000027291	-|
GO:0005743	mitochondrial inner membrane	cellular_component	0.25437	1	1	25	55	4727	ENSSSCG00000016893	NDUFS4|
GO:0010817	regulation of hormone levels	biological_process	0.25633	1	1	25	56	4727	ENSSSCG00000001476	HSD17B8|
GO:0003677	DNA binding	molecular_function	0.25867	1	3	25	335	4727	ENSSSCG00000025910,ENSSSCG00000028283,ENSSSCG00000010597	ZNF277|-|TAF5|
GO:0006397	mRNA processing	biological_process	0.26084	1	1	25	57	4727	ENSSSCG00000023216	-|
GO:0032259	methylation	biological_process	0.26136	1	1	25	57	4727	ENSSSCG00000021717	SUV39H1|
GO:0045934	negative regulation of nucleobase-containing compound metabolic process	biological_process	0.26194	1	2	25	187	4727	ENSSSCG00000030118,ENSSSCG00000021717	SAP30|SUV39H1|
GO:0000785	chromatin	cellular_component	0.26436	1	1	25	58	4727	ENSSSCG00000021717	SUV39H1|
GO:0040017	positive regulation of locomotion	biological_process	0.26573	1	1	25	58	4727	ENSSSCG00000027291	-|
GO:0031327	negative regulation of cellular biosynthetic process	biological_process	0.26618	1	2	25	189	4727	ENSSSCG00000021717,ENSSSCG00000030118	SUV39H1|SAP30|
GO:0051172	negative regulation of nitrogen compound metabolic process	biological_process	0.26778	1	2	25	190	4727	ENSSSCG00000021717,ENSSSCG00000030118	SUV39H1|SAP30|
GO:0009890	negative regulation of biosynthetic process	biological_process	0.26811	1	2	25	190	4727	ENSSSCG00000021717,ENSSSCG00000030118	SUV39H1|SAP30|
GO:0007005	mitochondrion organization	biological_process	0.26988	1	1	25	59	4727	ENSSSCG00000016893	NDUFS4|
GO:0005929	cilium	cellular_component	0.27096	1	1	25	58	4727	ENSSSCG00000024754	-|
GO:0030031	cell projection assembly	biological_process	0.27372	1	1	25	58	4727	ENSSSCG00000024754	-|
GO:0019866	organelle inner membrane	cellular_component	0.27431	1	1	25	60	4727	ENSSSCG00000016893	NDUFS4|
GO:0006955	immune response	biological_process	0.27446	1	2	25	196	4727	ENSSSCG00000027291,ENSSSCG00000026872	-|TNFSF13|
GO:0044454	nuclear chromosome part	cellular_component	0.27667	1	1	25	61	4727	ENSSSCG00000023216	-|
GO:0042127	regulation of cell proliferation	biological_process	0.2794	1	2	25	196	4727	ENSSSCG00000016893,ENSSSCG00000027291	NDUFS4|-|
GO:0006139	nucleobase-containing compound metabolic process	biological_process	0.28366	1	7	25	1016	4727	ENSSSCG00000010597,ENSSSCG00000026872,ENSSSCG00000021717,ENSSSCG00000023216,ENSSSCG00000030118,ENSSSCG00000028283,ENSSSCG00000025851	TAF5|TNFSF13|SUV39H1|-|SAP30|-|-|
GO:0042692	muscle cell differentiation	biological_process	0.28813	1	1	25	64	4727	ENSSSCG00000030118	SAP30|
GO:0015711	organic anion transport	biological_process	0.29462	1	1	25	65	4727	ENSSSCG00000029434	SLC10A5|
GO:0014706	striated muscle tissue development	biological_process	0.30005	1	1	25	67	4727	ENSSSCG00000030118	SAP30|
GO:0046483	heterocycle metabolic process	biological_process	0.30027	1	7	25	1034	4727	ENSSSCG00000030118,ENSSSCG00000023216,ENSSSCG00000025851,ENSSSCG00000028283,ENSSSCG00000010597,ENSSSCG00000026872,ENSSSCG00000021717	SAP30|-|-|-|TAF5|TNFSF13|SUV39H1|
GO:0006725	cellular aromatic compound metabolic process	biological_process	0.30312	1	7	25	1037	4727	ENSSSCG00000021717,ENSSSCG00000026872,ENSSSCG00000010597,ENSSSCG00000028283,ENSSSCG00000025851,ENSSSCG00000023216,ENSSSCG00000030118	SUV39H1|TNFSF13|TAF5|-|-|-|SAP30|
GO:0007517	muscle organ development	biological_process	0.3039	1	1	25	68	4727	ENSSSCG00000030118	SAP30|
GO:0044421	extracellular region part	cellular_component	0.31075	1	4	25	533	4727	ENSSSCG00000027291,ENSSSCG00000026872,ENSSSCG00000015332,ENSSSCG00000020848	-|TNFSF13|-|CMBL|
GO:0008509	anion transmembrane transporter activity	molecular_function	0.3118	1	1	25	70	4727	ENSSSCG00000029434	SLC10A5|
GO:0060537	muscle tissue development	biological_process	0.31198	1	1	25	70	4727	ENSSSCG00000030118	SAP30|
GO:0000228	nuclear chromosome	cellular_component	0.31255	1	1	25	70	4727	ENSSSCG00000023216	-|
GO:0046649	lymphocyte activation	biological_process	0.31528	1	1	25	71	4727	ENSSSCG00000026872	TNFSF13|
GO:0070013	intracellular organelle lumen	cellular_component	0.32054	1	4	25	541	4727	ENSSSCG00000023216,ENSSSCG00000030118,ENSSSCG00000001476,ENSSSCG00000010597	-|SAP30|HSD17B8|TAF5|
GO:0043233	organelle lumen	cellular_component	0.3218	1	4	25	542	4727	ENSSSCG00000010597,ENSSSCG00000023216,ENSSSCG00000030118,ENSSSCG00000001476	TAF5|-|SAP30|HSD17B8|
GO:0006887	exocytosis	biological_process	0.32214	1	1	25	72	4727	ENSSSCG00000027291	-|
GO:0006935	chemotaxis	biological_process	0.32633	1	1	25	73	4727	ENSSSCG00000027291	-|
GO:0042330	taxis	biological_process	0.32633	1	1	25	73	4727	ENSSSCG00000027291	-|
GO:0019221	cytokine-mediated signaling pathway	biological_process	0.32773	1	1	25	73	4727	ENSSSCG00000027291	-|
GO:0007049	cell cycle	biological_process	0.32828	1	2	25	221	4727	ENSSSCG00000028283,ENSSSCG00000025851	-|-|
GO:0080135	regulation of cellular response to stress	biological_process	0.32901	1	1	25	74	4727	ENSSSCG00000025910	ZNF277|
GO:0009617	response to bacterium	biological_process	0.32907	1	1	25	75	4727	ENSSSCG00000027291	-|
GO:0031974	membrane-enclosed lumen	cellular_component	0.32917	1	4	25	548	4727	ENSSSCG00000010597,ENSSSCG00000023216,ENSSSCG00000001476,ENSSSCG00000030118	TAF5|-|HSD17B8|SAP30|
GO:0034641	cellular nitrogen compound metabolic process	biological_process	0.33325	1	7	25	1069	4727	ENSSSCG00000028283,ENSSSCG00000025851,ENSSSCG00000023216,ENSSSCG00000030118,ENSSSCG00000026872,ENSSSCG00000021717,ENSSSCG00000010597	-|-|-|SAP30|TNFSF13|SUV39H1|TAF5|
GO:0016071	mRNA metabolic process	biological_process	0.33953	1	1	25	78	4727	ENSSSCG00000023216	-|
GO:0015629	actin cytoskeleton	cellular_component	0.33954	1	1	25	77	4727	ENSSSCG00000010597	TAF5|
GO:0003712	transcription cofactor activity	molecular_function	0.33958	1	1	25	77	4727	ENSSSCG00000030118	SAP30|
GO:0006954	inflammatory response	biological_process	0.34007	1	1	25	78	4727	ENSSSCG00000027291	-|
GO:0031966	mitochondrial membrane	cellular_component	0.34046	1	1	25	78	4727	ENSSSCG00000016893	NDUFS4|
GO:0014070	response to organic cyclic compound	biological_process	0.34242	1	1	25	77	4727	ENSSSCG00000016893	NDUFS4|
GO:0050776	regulation of immune response	biological_process	0.34259	1	1	25	79	4727	ENSSSCG00000026872	TNFSF13|
GO:0015077	monovalent inorganic cation transmembrane transporter activity	molecular_function	0.34269	1	1	25	79	4727	ENSSSCG00000029434	SLC10A5|
GO:0010243	response to organonitrogen compound	biological_process	0.34512	1	1	25	78	4727	ENSSSCG00000016893	NDUFS4|
GO:0048523	negative regulation of cellular process	biological_process	0.34617	1	4	25	559	4727	ENSSSCG00000021717,ENSSSCG00000028283,ENSSSCG00000025851,ENSSSCG00000030118	SUV39H1|-|-|SAP30|
GO:0008610	lipid biosynthetic process	biological_process	0.3499	1	1	25	81	4727	ENSSSCG00000001476	HSD17B8|
GO:0005102	receptor binding	molecular_function	0.35424	1	2	25	234	4727	ENSSSCG00000026872,ENSSSCG00000027291	TNFSF13|-|
GO:0006996	organelle organization	biological_process	0.35801	1	4	25	569	4727	ENSSSCG00000024754,ENSSSCG00000021717,ENSSSCG00000016893,ENSSSCG00000010597	-|SUV39H1|NDUFS4|TAF5|
GO:0000989	transcription factor binding transcription factor activity	molecular_function	0.36115	1	1	25	83	4727	ENSSSCG00000030118	SAP30|
GO:0030334	regulation of cell migration	biological_process	0.36522	1	1	25	85	4727	ENSSSCG00000027291	-|
GO:0032101	regulation of response to external stimulus	biological_process	0.36593	1	1	25	84	4727	ENSSSCG00000027291	-|
GO:0043228	non-membrane-bounded organelle	cellular_component	0.36788	1	4	25	578	4727	ENSSSCG00000023216,ENSSSCG00000028283,ENSSSCG00000010597,ENSSSCG00000021717	-|-|TAF5|SUV39H1|
GO:0043232	intracellular non-membrane-bounded organelle	cellular_component	0.36788	1	4	25	578	4727	ENSSSCG00000028283,ENSSSCG00000023216,ENSSSCG00000021717,ENSSSCG00000010597	-|-|SUV39H1|TAF5|
GO:0008283	cell proliferation	biological_process	0.36827	1	2	25	241	4727	ENSSSCG00000016893,ENSSSCG00000027291	NDUFS4|-|
GO:0007420	brain development	biological_process	0.36849	1	1	25	85	4727	ENSSSCG00000016893	NDUFS4|
GO:0044446	intracellular organelle part	cellular_component	0.37083	1	7	25	1111	4727	ENSSSCG00000030118,ENSSSCG00000001476,ENSSSCG00000023216,ENSSSCG00000028283,ENSSSCG00000010597,ENSSSCG00000016893,ENSSSCG00000021717	SAP30|HSD17B8|-|-|TAF5|NDUFS4|SUV39H1|
GO:0000988	protein binding transcription factor activity	molecular_function	0.3713	1	1	25	86	4727	ENSSSCG00000030118	SAP30|
GO:1901698	response to nitrogen compound	biological_process	0.37274	1	1	25	86	4727	ENSSSCG00000016893	NDUFS4|
GO:0006820	anion transport	biological_process	0.37355	1	1	25	87	4727	ENSSSCG00000029434	SLC10A5|
GO:0000977	RNA polymerase II regulatory region sequence-specific DNA binding	molecular_function	0.37622	1	1	25	88	4727	ENSSSCG00000025910	ZNF277|
GO:0001012	RNA polymerase II regulatory region DNA binding	molecular_function	0.37622	1	1	25	88	4727	ENSSSCG00000025910	ZNF277|
GO:0022804	active transmembrane transporter activity	molecular_function	0.37755	1	1	25	88	4727	ENSSSCG00000029434	SLC10A5|
GO:0061061	muscle structure development	biological_process	0.37811	1	1	25	89	4727	ENSSSCG00000030118	SAP30|
GO:0007610	behavior	biological_process	0.37904	1	1	25	87	4727	ENSSSCG00000027291	-|
GO:0071345	cellular response to cytokine stimulus	biological_process	0.38062	1	1	25	88	4727	ENSSSCG00000027291	-|
GO:2000145	regulation of cell motility	biological_process	0.3852	1	1	25	91	4727	ENSSSCG00000027291	-|
GO:0044422	organelle part	cellular_component	0.38975	1	7	25	1130	4727	ENSSSCG00000023216,ENSSSCG00000001476,ENSSSCG00000030118,ENSSSCG00000028283,ENSSSCG00000010597,ENSSSCG00000021717,ENSSSCG00000016893	-|HSD17B8|SAP30|-|TAF5|SUV39H1|NDUFS4|
GO:0044428	nuclear part	cellular_component	0.39029	1	4	25	596	4727	ENSSSCG00000030118,ENSSSCG00000023216,ENSSSCG00000010597,ENSSSCG00000021717	SAP30|-|TAF5|SUV39H1|
GO:0043227	membrane-bounded organelle	cellular_component	0.39139	1	11	25	1860	4727	ENSSSCG00000020848,ENSSSCG00000030118,ENSSSCG00000023216,ENSSSCG00000028283,ENSSSCG00000016893,ENSSSCG00000026872,ENSSSCG00000024754,ENSSSCG00000001476,ENSSSCG00000021793,ENSSSCG00000010597,ENSSSCG00000021717	CMBL|SAP30|-|-|NDUFS4|TNFSF13|-|HSD17B8|SMIM14|TAF5|SUV39H1|
GO:0005739	mitochondrion	cellular_component	0.39256	1	2	25	255	4727	ENSSSCG00000001476,ENSSSCG00000016893	HSD17B8|NDUFS4|
GO:0042623	ATPase activity, coupled	molecular_function	0.39569	1	1	25	93	4727	ENSSSCG00000028283	-|
GO:0033993	response to lipid	biological_process	0.39657	1	1	25	93	4727	ENSSSCG00000027291	-|
GO:0048519	negative regulation of biological process	biological_process	0.39698	1	4	25	599	4727	ENSSSCG00000021717,ENSSSCG00000030118,ENSSSCG00000028283,ENSSSCG00000025851	SUV39H1|SAP30|-|-|
GO:0005525	GTP binding	molecular_function	0.39726	1	1	25	95	4727	ENSSSCG00000016449	GIMAP2|
GO:0008150	biological_process	biological_process	0.39926	1	21	25	3763	4727	ENSSSCG00000025910,ENSSSCG00000024754,ENSSSCG00000001476,ENSSSCG00000015332,ENSSSCG00000029434,ENSSSCG00000027073,ENSSSCG00000030118,ENSSSCG00000028283,ENSSSCG00000028543,ENSSSCG00000010597,ENSSSCG00000025988,ENSSSCG00000000376,ENSSSCG00000027291,ENSSSCG00000030262,ENSSSCG00000021717,ENSSSCG00000012000,ENSSSCG00000016893,ENSSSCG00000026872,ENSSSCG00000023216,ENSSSCG00000020848,ENSSSCG00000025851	ZNF277|-|HSD17B8|-|SLC10A5|-|SAP30|-|-|TAF5|-|-|-|GDPD1|SUV39H1|-|NDUFS4|TNFSF13|-|CMBL|-|
GO:0019001	guanyl nucleotide binding	molecular_function	0.40538	1	1	25	97	4727	ENSSSCG00000016449	GIMAP2|
GO:0032561	guanyl ribonucleotide binding	molecular_function	0.40538	1	1	25	97	4727	ENSSSCG00000016449	GIMAP2|
GO:0000976	transcription regulatory region sequence-specific DNA binding	molecular_function	0.40883	1	1	25	98	4727	ENSSSCG00000025910	ZNF277|
GO:0010605	negative regulation of macromolecule metabolic process	biological_process	0.41166	1	2	25	264	4727	ENSSSCG00000021717,ENSSSCG00000030118	SUV39H1|SAP30|
GO:0031324	negative regulation of cellular metabolic process	biological_process	0.41171	1	2	25	263	4727	ENSSSCG00000021717,ENSSSCG00000030118	SUV39H1|SAP30|
GO:0060255	regulation of macromolecule metabolic process	biological_process	0.41536	1	5	25	795	4727	ENSSSCG00000030118,ENSSSCG00000010597,ENSSSCG00000016893,ENSSSCG00000026872,ENSSSCG00000021717	SAP30|TAF5|NDUFS4|TNFSF13|SUV39H1|
GO:0040012	regulation of locomotion	biological_process	0.41597	1	1	25	100	4727	ENSSSCG00000027291	-|
GO:0034097	response to cytokine stimulus	biological_process	0.4163	1	1	25	99	4727	ENSSSCG00000027291	-|
GO:0043623	cellular protein complex assembly	biological_process	0.41916	1	1	25	101	4727	ENSSSCG00000016893	NDUFS4|
GO:0019725	cellular homeostasis	biological_process	0.42254	1	1	25	102	4727	ENSSSCG00000028543	-|
GO:0032502	developmental process	biological_process	0.4266	1	5	25	799	4727	ENSSSCG00000016893,ENSSSCG00000026872,ENSSSCG00000030118,ENSSSCG00000024754,ENSSSCG00000025910	NDUFS4|TNFSF13|SAP30|-|ZNF277|
GO:0046873	metal ion transmembrane transporter activity	molecular_function	0.42725	1	1	25	104	4727	ENSSSCG00000029434	SLC10A5|
GO:0070925	organelle assembly	biological_process	0.42752	1	1	25	103	4727	ENSSSCG00000024754	-|
GO:0002520	immune system development	biological_process	0.42899	1	1	25	104	4727	ENSSSCG00000026872	TNFSF13|
GO:0051270	regulation of cellular component movement	biological_process	0.42953	1	1	25	104	4727	ENSSSCG00000027291	-|
GO:0005575	cellular_component	cellular_component	0.43105	1	21	25	3795	4727	ENSSSCG00000028283,ENSSSCG00000025463,ENSSSCG00000028543,ENSSSCG00000015332,ENSSSCG00000029434,ENSSSCG00000027073,ENSSSCG00000030118,ENSSSCG00000012350,ENSSSCG00000024754,ENSSSCG00000001476,ENSSSCG00000021793,ENSSSCG00000023216,ENSSSCG00000020848,ENSSSCG00000016893,ENSSSCG00000026872,ENSSSCG00000016449,ENSSSCG00000012000,ENSSSCG00000027291,ENSSSCG00000030262,ENSSSCG00000021717,ENSSSCG00000010597	-|-|-|-|SLC10A5|-|SAP30|MAGEH1|-|HSD17B8|SMIM14|-|CMBL|NDUFS4|TNFSF13|GIMAP2|-|-|GDPD1|SUV39H1|TAF5|
GO:1901701	cellular response to oxygen-containing compound	biological_process	0.44772	1	1	25	109	4727	ENSSSCG00000025910	ZNF277|
GO:0008284	positive regulation of cell proliferation	biological_process	0.44887	1	1	25	111	4727	ENSSSCG00000016893	NDUFS4|
GO:1901362	organic cyclic compound biosynthetic process	biological_process	0.4495	1	4	25	643	4727	ENSSSCG00000010597,ENSSSCG00000021717,ENSSSCG00000001476,ENSSSCG00000030118	TAF5|SUV39H1|HSD17B8|SAP30|
GO:0043170	macromolecule metabolic process	biological_process	0.4507	1	9	25	1562	4727	ENSSSCG00000021717,ENSSSCG00000010597,ENSSSCG00000025851,ENSSSCG00000028283,ENSSSCG00000020848,ENSSSCG00000030118,ENSSSCG00000023216,ENSSSCG00000016893,ENSSSCG00000026872	SUV39H1|TAF5|-|-|CMBL|SAP30|-|NDUFS4|TNFSF13|
GO:0009892	negative regulation of metabolic process	biological_process	0.45453	1	2	25	286	4727	ENSSSCG00000021717,ENSSSCG00000030118	SUV39H1|SAP30|
GO:0022890	inorganic cation transmembrane transporter activity	molecular_function	0.46263	1	1	25	116	4727	ENSSSCG00000029434	SLC10A5|
GO:0007417	central nervous system development	biological_process	0.46609	1	1	25	116	4727	ENSSSCG00000016893	NDUFS4|
GO:0009628	response to abiotic stimulus	biological_process	0.46637	1	1	25	116	4727	ENSSSCG00000021717	SUV39H1|
GO:0046914	transition metal ion binding	molecular_function	0.47146	1	2	25	295	4727	ENSSSCG00000000376,ENSSSCG00000021717	-|SUV39H1|
GO:0048858	cell projection morphogenesis	biological_process	0.47193	1	1	25	116	4727	ENSSSCG00000024754	-|
GO:0044260	cellular macromolecule metabolic process	biological_process	0.47676	1	8	25	1405	4727	ENSSSCG00000021717,ENSSSCG00000010597,ENSSSCG00000016893,ENSSSCG00000026872,ENSSSCG00000025851,ENSSSCG00000028283,ENSSSCG00000030118,ENSSSCG00000023216	SUV39H1|TAF5|NDUFS4|TNFSF13|-|-|SAP30|-|
GO:0051707	response to other organism	biological_process	0.47726	1	1	25	121	4727	ENSSSCG00000027291	-|
GO:0048583	regulation of response to stimulus	biological_process	0.47741	1	3	25	480	4727	ENSSSCG00000025910,ENSSSCG00000027291,ENSSSCG00000026872	ZNF277|-|TNFSF13|
GO:0043169	cation binding	molecular_function	0.48298	1	4	25	668	4727	ENSSSCG00000021717,ENSSSCG00000000376,ENSSSCG00000025463,ENSSSCG00000012000	SUV39H1|-|-|-|
GO:0009607	response to biotic stimulus	biological_process	0.48585	1	1	25	124	4727	ENSSSCG00000027291	-|
GO:0016887	ATPase activity	molecular_function	0.48801	1	1	25	123	4727	ENSSSCG00000028283	-|
GO:0050793	regulation of developmental process	biological_process	0.48803	1	2	25	304	4727	ENSSSCG00000026872,ENSSSCG00000025910	TNFSF13|ZNF277|
GO:0032990	cell part morphogenesis	biological_process	0.48898	1	1	25	122	4727	ENSSSCG00000024754	-|
GO:0009611	response to wounding	biological_process	0.48938	1	1	25	125	4727	ENSSSCG00000027291	-|
GO:0044255	cellular lipid metabolic process	biological_process	0.48973	1	1	25	126	4727	ENSSSCG00000025988	-|
GO:0080090	regulation of primary metabolic process	biological_process	0.49927	1	5	25	866	4727	ENSSSCG00000030118,ENSSSCG00000010597,ENSSSCG00000021717,ENSSSCG00000026872,ENSSSCG00000016893	SAP30|TAF5|SUV39H1|TNFSF13|NDUFS4|
GO:0006396	RNA processing	biological_process	0.50361	1	1	25	131	4727	ENSSSCG00000023216	-|
GO:0044767	single-organism developmental process	biological_process	0.50882	1	4	25	685	4727	ENSSSCG00000024754,ENSSSCG00000030118,ENSSSCG00000025910,ENSSSCG00000016893	-|SAP30|ZNF277|NDUFS4|
GO:0006357	regulation of transcription from RNA polymerase II promoter	biological_process	0.51114	1	2	25	318	4727	ENSSSCG00000021717,ENSSSCG00000030118	SUV39H1|SAP30|
GO:0002376	immune system process	biological_process	0.51502	1	2	25	322	4727	ENSSSCG00000026872,ENSSSCG00000027291	TNFSF13|-|
GO:0010033	response to organic substance	biological_process	0.51677	1	2	25	318	4727	ENSSSCG00000027291,ENSSSCG00000016893	-|NDUFS4|
GO:0019219	regulation of nucleobase-containing compound metabolic process	biological_process	0.51828	1	4	25	695	4727	ENSSSCG00000021717,ENSSSCG00000026872,ENSSSCG00000010597,ENSSSCG00000030118	SUV39H1|TNFSF13|TAF5|SAP30|
GO:0031981	nuclear lumen	cellular_component	0.51919	1	3	25	511	4727	ENSSSCG00000030118,ENSSSCG00000023216,ENSSSCG00000010597	SAP30|-|TAF5|
GO:0030529	ribonucleoprotein complex	cellular_component	0.52274	1	1	25	139	4727	ENSSSCG00000023216	-|
GO:0051171	regulation of nitrogen compound metabolic process	biological_process	0.52655	1	4	25	702	4727	ENSSSCG00000030118,ENSSSCG00000010597,ENSSSCG00000021717,ENSSSCG00000026872	SAP30|TAF5|SUV39H1|TNFSF13|
GO:0050896	response to stimulus	biological_process	0.52934	1	9	25	1649	4727	ENSSSCG00000027291,ENSSSCG00000021717,ENSSSCG00000025910,ENSSSCG00000026872,ENSSSCG00000016893,ENSSSCG00000015332,ENSSSCG00000027073,ENSSSCG00000028283,ENSSSCG00000025851	-|SUV39H1|ZNF277|TNFSF13|NDUFS4|-|-|-|-|
GO:0005975	carbohydrate metabolic process	biological_process	0.53027	1	1	25	140	4727	ENSSSCG00000012000	-|
GO:0031323	regulation of cellular metabolic process	biological_process	0.53128	1	5	25	894	4727	ENSSSCG00000010597,ENSSSCG00000016893,ENSSSCG00000026872,ENSSSCG00000021717,ENSSSCG00000030118	TAF5|NDUFS4|TNFSF13|SUV39H1|SAP30|
GO:0032940	secretion by cell	biological_process	0.53184	1	1	25	141	4727	ENSSSCG00000027291	-|
GO:0070011	peptidase activity, acting on L-amino acid peptides	molecular_function	0.53196	1	1	25	141	4727	ENSSSCG00000020848	CMBL|
GO:0006355	regulation of transcription, DNA-dependent	biological_process	0.53258	1	3	25	522	4727	ENSSSCG00000021717,ENSSSCG00000010597,ENSSSCG00000030118	SUV39H1|TAF5|SAP30|
GO:0016070	RNA metabolic process	biological_process	0.53358	1	4	25	714	4727	ENSSSCG00000030118,ENSSSCG00000023216,ENSSSCG00000010597,ENSSSCG00000021717	SAP30|-|TAF5|SUV39H1|
GO:2001141	regulation of RNA biosynthetic process	biological_process	0.53391	1	3	25	523	4727	ENSSSCG00000030118,ENSSSCG00000021717,ENSSSCG00000010597	SAP30|SUV39H1|TAF5|
GO:0005509	calcium ion binding	molecular_function	0.53608	1	1	25	140	4727	ENSSSCG00000025463	-|
GO:0008233	peptidase activity	molecular_function	0.54186	1	1	25	145	4727	ENSSSCG00000020848	CMBL|
GO:0008324	cation transmembrane transporter activity	molecular_function	0.54669	1	1	25	147	4727	ENSSSCG00000029434	SLC10A5|
[truncated: 178 more rows]

## Sheet: VR2332 UP
GO_accession	Description	Term_type	Over_represented_pValue	Corrected_pValue	CAD_item	CAD_list	Bg_item	Bg_list	Gene_names	Gene_description
[truncated: 3,326 more rows]

## Sheet: VR2332 DOWN
GO_accession	Description	Term_type	Over_represented_pValue	Corrected_pValue	CAD_item	CAD_list	Bg_item	Bg_list	Gene_names	Gene_description
[truncated: 2,275 more rows]
