# Supplementary material for: The long non-coding RNA LNC_000397 negatively regulates PRRSV replication through induction of interferon-stimulated genes
Source: Virol J. 2022 Mar 5;19:40. doi: 10.1186/s12985-022-01761-x (PMC8897765; doi:10.1186/s12985-022-01761-x)
Supplement: Supplementary file 5 — Additional file 5: Table S4 Lists KEGG pathway enrichment of up-regulated and down-regulated mRNAs in GSWW and VR2332 infected groups. [file 12985_2022_1761_MOESM5_ESM.xlsx]

## Sheet: GSWW UP
##Databases: KEGG PATHWAY
##Statistical test method: hypergeometric test / Fisher's exact test
##FDR correction method: Benjamini and Hochberg
#Term	Database	ID	Input number	Background number	P-Value	Corrected P-Value	Input	KO	Entrez_ID	KO_name	Hyperlink
Influenza A	KEGG PATHWAY	ssc05164	26	168	7.32389e-09	1.34027e-06	ENSSSCG00000000396|ENSSSCG00000002002|ENSSSCG00000015801|ENSSSCG00000009881|ENSSSCG00000009882|ENSSSCG00000021504|ENSSSCG00000008977|ENSSSCG00000030408|ENSSSCG00000008090|ENSSSCG00000020906|ENSSSCG00000005163|ENSSSCG00000003395|ENSSSCG00000028711|ENSSSCG00000029475|ENSSSCG00000001404|ENSSSCG00000008648|ENSSSCG00000006543|ENSSSCG00000030839|ENSSSCG00000016057|ENSSSCG00000017723|ENSSSCG00000008088|…	ssc:396923|ssc:780415|ssc:100037937|ssc:595128|ssc:397570|ssc:100310806|ssc:494019|ssc:396723|ssc:397094|ssc:406191|ssc:445459|ssc:100518131|ssc:397319|ssc:100622285|ssc:397086|ssc:396752|ssc:100523784|ssc:396913|ssc:396655|ssc:397422|ssc:397122|ssc:100037289|ssc:397128|ssc:100514498|ssc:100523731|ssc:100157336|	396923|780415|100037937|595128|397570|100310806|494019|396723|397094|406191|445459|100518131|397319|100622285|397086|396752|100523784|396913|396655|397422|397122|100037289|397128|100514498|100523731|100157336|	STAT2| |TLR3, TLR-3|OAS2|OAS1|IFN-ALPHAOMEGA|CXCL10|DDX58, RHIV-1, RIG-1, RIG-I, RLR-1|IL1A, IL-1alpha|TNFSF10, TRAIL|IFNB1, IFN-beta, IFNb|PIK3CD|CASP1| |TNF, TNFa|RSAD2, CIG6, IRG6|ADAR|C-JUN, Jun|STAT1|CCL2, MCP-1|IL1B|IRF7|MX1, Mx, MxA| | |PML|	http://www.genome.jp/kegg-bin/show_pathway?ssc05164/ssc:397122%09red/ssc:100622285%09red/ssc:396913%09red/ssc:397094%09red/ssc:595128%09red/ssc:100523784%09red/ssc:780415%09red/ssc:445459%09red/ssc:100157336%09red/ssc:396723%09red/ssc:100514498%09red/ssc:397319%09red/ssc:397128%09red/ssc:397570%09red/ssc:406191%09red/ssc:100523731%09red/ssc:494019%09red/ssc:397086%09red/ssc:100310806%09red/ssc:39…
Herpes simplex infection	KEGG PATHWAY	ssc05168	23	182	1.34196e-06	0.00012279	ENSSSCG00000000396|ENSSSCG00000021504|ENSSSCG00000015801|ENSSSCG00000001341|ENSSSCG00000009881|ENSSSCG00000009882|ENSSSCG00000017983|ENSSSCG00000002002|ENSSSCG00000030408|ENSSSCG00000020893|ENSSSCG00000005163|ENSSSCG00000025181|ENSSSCG00000002383|ENSSSCG00000001404|ENSSSCG00000001509|ENSSSCG00000030839|ENSSSCG00000010453|ENSSSCG00000017723|ENSSSCG00000008088|ENSSSCG00000012853|ENSSSCG00000016057|…	ssc:396923|ssc:100310806|ssc:100037937|ssc:100135031|ssc:595128|ssc:397570|ssc:100620648|ssc:780415|ssc:396723|ssc:733649|ssc:445459|ssc:100523731|ssc:100144486|ssc:397086|ssc:100524813|ssc:396913|ssc:100153038|ssc:397422|ssc:397122|ssc:100037289|ssc:396655|ssc:733650|ssc:100157336|	396923|100310806|100037937|100135031|595128|397570|100620648|780415|396723|733649|445459|100523731|100144486|397086|100524813|396913|100153038|397422|397122|100037289|396655|733650|100157336|	STAT2|IFN-ALPHAOMEGA|TLR3, TLR-3|SLA-2, SLA-B|OAS2|OAS1|PER1| |DDX58, RHIV-1, RIG-1, RIG-I, RLR-1|TAP1|IFNB1, IFN-beta, IFNb| |FOS, c-fos|TNF, TNFa|DAXX|C-JUN, Jun|IFIT1|CCL2, MCP-1|IL1B|IRF7|STAT1|TAP2|PML|	http://www.genome.jp/kegg-bin/show_pathway?ssc05168/ssc:100153038%09red/ssc:445459%09red/ssc:396913%09red/ssc:595128%09red/ssc:100524813%09red/ssc:780415%09red/ssc:733649%09red/ssc:396723%09red/ssc:397122%09red/ssc:397570%09red/ssc:100037937%09red/ssc:100523731%09red/ssc:397086%09red/ssc:100157336%09red/ssc:100310806%09red/ssc:396923%09red/ssc:100037289%09red/ssc:397422%09red/ssc:100135031%09red/…
Measles	KEGG PATHWAY	ssc05162	18	133	7.97871e-06	0.000457622	ENSSSCG00000004154|ENSSSCG00000008090|ENSSSCG00000006543|ENSSSCG00000000396|ENSSSCG00000002002|ENSSSCG00000016057|ENSSSCG00000008088|ENSSSCG00000003395|ENSSSCG00000012077|ENSSSCG00000009881|ENSSSCG00000025181|ENSSSCG00000009882|ENSSSCG00000021504|ENSSSCG00000020906|ENSSSCG00000021964|ENSSSCG00000005163|ENSSSCG00000030408|ENSSSCG00000012853	ssc:100622156|ssc:397094|ssc:100523784|ssc:396923|ssc:780415|ssc:396655|ssc:397122|ssc:100518131|ssc:397128|ssc:595128|ssc:100523731|ssc:397570|ssc:100310806|ssc:406191|ssc:100514498|ssc:445459|ssc:396723|ssc:100037289|	100622156|397094|100523784|396923|780415|396655|397122|100518131|397128|595128|100523731|397570|100310806|406191|100514498|445459|396723|100037289|	TNFAIP3|IL1A, IL-1alpha|ADAR|STAT2| |STAT1|IL1B|PIK3CD|MX1, Mx, MxA|OAS2| |OAS1|IFN-ALPHAOMEGA|TNFSF10, TRAIL| |IFNB1, IFN-beta, IFNb|DDX58, RHIV-1, RIG-1, RIG-I, RLR-1|IRF7|	http://www.genome.jp/kegg-bin/show_pathway?ssc05162/ssc:100518131%09red/ssc:780415%09red/ssc:396655%09red/ssc:100037289%09red/ssc:100622156%09red/ssc:100523731%09red/ssc:406191%09red/ssc:396723%09red/ssc:397094%09red/ssc:100310806%09red/ssc:100514498%09red/ssc:397122%09red/ssc:396923%09red/ssc:397128%09red/ssc:595128%09red/ssc:397570%09red/ssc:100523784%09red/ssc:445459%09red
Cytosolic DNA-sensing pathway	KEGG PATHWAY	ssc04623	12	61	1.00027e-05	0.000457622	ENSSSCG00000006543|ENSSSCG00000005163|ENSSSCG00000008088|ENSSSCG00000012853|ENSSSCG00000017698|ENSSSCG00000028711|ENSSSCG00000011358|ENSSSCG00000021504|ENSSSCG00000008977|ENSSSCG00000007508|ENSSSCG00000030408|ENSSSCG00000021383	ssc:100523784|ssc:445459|ssc:397122|ssc:100037289|ssc:396668|ssc:397319|ssc:100155669|ssc:100310806|ssc:494019|ssc:100144524|ssc:396723|ssc:100516408|	100523784|445459|397122|100037289|396668|397319|100155669|100310806|494019|100144524|396723|100516408|	ADAR|IFNB1, IFN-beta, IFNb|IL1B|IRF7|CCL4, MIP-1BETA, MIP1b, SCY4A|CASP1|TREX1|IFN-ALPHAOMEGA|CXCL10|ZBP1, DAI|DDX58, RHIV-1, RIG-1, RIG-I, RLR-1|MB21D1|	http://www.genome.jp/kegg-bin/show_pathway?ssc04623/ssc:396723%09red/ssc:100037289%09red/ssc:396668%09red/ssc:445459%09red/ssc:100144524%09red/ssc:494019%09red/ssc:397319%09red/ssc:100516408%09red/ssc:100310806%09red/ssc:397122%09red/ssc:100155669%09red/ssc:100523784%09red
Hepatitis C	KEGG PATHWAY	ssc05160	16	127	5.48617e-05	0.00191831	ENSSSCG00000030900|ENSSSCG00000021964|ENSSSCG00000003395|ENSSSCG00000000396|ENSSSCG00000002002|ENSSSCG00000010453|ENSSSCG00000015801|ENSSSCG00000012853|ENSSSCG00000016057|ENSSSCG00000009881|ENSSSCG00000025181|ENSSSCG00000009882|ENSSSCG00000021504|ENSSSCG00000001404|ENSSSCG00000030408|ENSSSCG00000005163	ssc:396801|ssc:100514498|ssc:100518131|ssc:396923|ssc:780415|ssc:100153038|ssc:100037937|ssc:100037289|ssc:396655|ssc:595128|ssc:100523731|ssc:397570|ssc:100310806|ssc:397086|ssc:396723|ssc:445459|	396801|100514498|100518131|396923|780415|100153038|100037937|100037289|396655|595128|100523731|397570|100310806|397086|396723|445459|	LDLR| |PIK3CD|STAT2| |IFIT1|TLR3, TLR-3|IRF7|STAT1|OAS2| |OAS1|IFN-ALPHAOMEGA|TNF, TNFa|DDX58, RHIV-1, RIG-1, RIG-I, RLR-1|IFNB1, IFN-beta, IFNb|	http://www.genome.jp/kegg-bin/show_pathway?ssc05160/ssc:396801%09red/ssc:100153038%09red/ssc:445459%09red/ssc:100037289%09red/ssc:100523731%09red/ssc:100037937%09red/ssc:396723%09red/ssc:397086%09red/ssc:100310806%09red/ssc:100514498%09red/ssc:396923%09red/ssc:396655%09red/ssc:595128%09red/ssc:397570%09red/ssc:100518131%09red/ssc:780415%09red
Toll-like receptor signaling pathway	KEGG PATHWAY	ssc04620	14	101	6.28953e-05	0.00191831	ENSSSCG00000017700|ENSSSCG00000003395|ENSSSCG00000005163|ENSSSCG00000015801|ENSSSCG00000008088|ENSSSCG00000012853|ENSSSCG00000017698|ENSSSCG00000021964|ENSSSCG00000002383|ENSSSCG00000021504|ENSSSCG00000001404|ENSSSCG00000008977|ENSSSCG00000016057|ENSSSCG00000030839	ssc:494459|ssc:100518131|ssc:445459|ssc:100037937|ssc:397122|ssc:100037289|ssc:396668|ssc:100514498|ssc:100144486|ssc:100310806|ssc:397086|ssc:494019|ssc:396655|ssc:396913|	494459|100518131|445459|100037937|397122|100037289|396668|100514498|100144486|100310806|397086|494019|396655|396913|	CCL3L1|PIK3CD|IFNB1, IFN-beta, IFNb|TLR3, TLR-3|IL1B|IRF7|CCL4, MIP-1BETA, MIP1b, SCY4A| |FOS, c-fos|IFN-ALPHAOMEGA|TNF, TNFa|CXCL10|STAT1|C-JUN, Jun|	http://www.genome.jp/kegg-bin/show_pathway?ssc04620/ssc:100518131%09red/ssc:396913%09red/ssc:100037289%09red/ssc:396668%09red/ssc:494019%09red/ssc:100037937%09red/ssc:397086%09red/ssc:100310806%09red/ssc:100514498%09red/ssc:397122%09red/ssc:494459%09red/ssc:100144486%09red/ssc:396655%09red/ssc:445459%09red
Osteoclast differentiation	KEGG PATHWAY	ssc04380	15	133	0.000280094	0.00732247	ENSSSCG00000008090|ENSSSCG00000003395|ENSSSCG00000000396|ENSSSCG00000005163|ENSSSCG00000008088|ENSSSCG00000027855|ENSSSCG00000021964|ENSSSCG00000026832|ENSSSCG00000002383|ENSSSCG00000002002|ENSSSCG00000027575|ENSSSCG00000001404|ENSSSCG00000006678|ENSSSCG00000016057|ENSSSCG00000030839	ssc:397094|ssc:100518131|ssc:396923|ssc:445459|ssc:397122|ssc:100307052|ssc:100514498|ssc:100513084|ssc:100144486|ssc:780415|ssc:100622609|ssc:397086|ssc:613130|ssc:396655|ssc:396913|	397094|100518131|396923|445459|397122|100307052|100514498|100513084|100144486|780415|100622609|397086|613130|396655|396913|	IL1A, IL-1alpha|PIK3CD|STAT2|IFNB1, IFN-beta, IFNb|IL1B|SOCS1| |CSF1, MCSFBETA|FOS, c-fos| |RELB|TNF, TNFa|FCGR1A|STAT1|C-JUN, Jun|	http://www.genome.jp/kegg-bin/show_pathway?ssc04380/ssc:100518131%09red/ssc:780415%09red/ssc:100513084%09red/ssc:396913%09red/ssc:445459%09red/ssc:397086%09red/ssc:397094%09red/ssc:100307052%09red/ssc:613130%09red/ssc:100514498%09red/ssc:397122%09red/ssc:396923%09red/ssc:100144486%09red/ssc:396655%09red/ssc:100622609%09red
Cytokine-cytokine receptor interaction	KEGG PATHWAY	ssc04060	20	223	0.000494551	0.0113129	ENSSSCG00000008090|ENSSSCG00000016832|ENSSSCG00000021504|ENSSSCG00000024344|ENSSSCG00000017723|ENSSSCG00000020906|ENSSSCG00000008088|ENSSSCG00000015652|ENSSSCG00000017698|ENSSSCG00000026832|ENSSSCG00000017700|ENSSSCG00000001695|ENSSSCG00000010966|ENSSSCG00000001404|ENSSSCG00000009997|ENSSSCG00000008977|ENSSSCG00000009542|ENSSSCG00000005163|ENSSSCG00000017721|ENSSSCG00000003167	ssc:397094|ssc:100271930|ssc:100310806|ssc:414371|ssc:397422|ssc:406191|ssc:397122|ssc:397106|ssc:396668|ssc:100513084|ssc:494459|ssc:397157|ssc:494464|ssc:397086|ssc:100152038|ssc:494019|ssc:100038026|ssc:445459|ssc:100302703|ssc:100322867|	397094|100271930|100310806|414371|397422|406191|397122|397106|396668|100513084|494459|397157|494464|397086|100152038|494019|100038026|445459|100302703|100322867|	IL1A, IL-1alpha|IL7R, CD127|IFN-ALPHAOMEGA|CCR5|CCL2, MCP-1|TNFSF10, TRAIL|IL1B|IL10, CSIF, IL-10|CCL4, MIP-1BETA, MIP1b, SCY4A|CSF1, MCSFBETA|CCL3L1|VEGFA, VEGF|CCL19|TNF, TNFa|OSM|CXCL10|TNFSF13B, BAFF|IFNB1, IFN-beta, IFNb|CCL8|FLT3LG|	http://www.genome.jp/kegg-bin/show_pathway?ssc04060/ssc:494459%09red/ssc:445459%09red/ssc:100513084%09red/ssc:100038026%09red/ssc:100152038%09red/ssc:100310806%09red/ssc:100302703%09red/ssc:100271930%09red/ssc:406191%09red/ssc:397157%09red/ssc:494019%09red/ssc:397094%09red/ssc:100322867%09red/ssc:396668%09red/ssc:397122%09red/ssc:494464%09red/ssc:397106%09red/ssc:397086%09red/ssc:414371%09red/ssc…
Rheumatoid arthritis	KEGG PATHWAY	ssc05323	11	87	0.000755744	0.0153668	ENSSSCG00000008090|ENSSSCG00000030839|ENSSSCG00000017700|ENSSSCG00000017723|ENSSSCG00000008088|ENSSSCG00000026832|ENSSSCG00000002383|ENSSSCG00000001695|ENSSSCG00000001404|ENSSSCG00000012890|ENSSSCG00000009542	ssc:397094|ssc:396913|ssc:494459|ssc:397422|ssc:397122|ssc:100513084|ssc:100144486|ssc:397157|ssc:397086|ssc:100521769|ssc:100038026|	397094|396913|494459|397422|397122|100513084|100144486|397157|397086|100521769|100038026|	IL1A, IL-1alpha|C-JUN, Jun|CCL3L1|CCL2, MCP-1|IL1B|CSF1, MCSFBETA|FOS, c-fos|VEGFA, VEGF|TNF, TNFa|TCIRG1|TNFSF13B, BAFF|	http://www.genome.jp/kegg-bin/show_pathway?ssc05323/ssc:396913%09red/ssc:100521769%09red/ssc:100513084%09red/ssc:397157%09red/ssc:100038026%09red/ssc:397422%09red/ssc:397086%09red/ssc:397094%09red/ssc:397122%09red/ssc:494459%09red/ssc:100144486%09red
TNF signaling pathway	KEGG PATHWAY	ssc04668	12	109	0.00133686	0.0244645	ENSSSCG00000004154|ENSSSCG00000003395|ENSSSCG00000030839|ENSSSCG00000001050|ENSSSCG00000017723|ENSSSCG00000008088|ENSSSCG00000021964|ENSSSCG00000026832|ENSSSCG00000002383|ENSSSCG00000016520|ENSSSCG00000001404|ENSSSCG00000008977	ssc:100622156|ssc:100518131|ssc:396913|ssc:396915|ssc:397422|ssc:397122|ssc:100514498|ssc:100513084|ssc:100144486|ssc:100520468|ssc:397086|ssc:494019|	100622156|100518131|396913|396915|397422|397122|100514498|100513084|100144486|100520468|397086|494019|	TNFAIP3|PIK3CD|C-JUN, Jun|EDN1, EDN, ET-1, ET1, PPET1|CCL2, MCP-1|IL1B| |CSF1, MCSFBETA|FOS, c-fos|CREB3L2|TNF, TNFa|CXCL10|	http://www.genome.jp/kegg-bin/show_pathway?ssc04668/ssc:100520468%09red/ssc:100518131%09red/ssc:100513084%09red/ssc:396913%09red/ssc:494019%09red/ssc:397422%09red/ssc:397086%09red/ssc:100622156%09red/ssc:100514498%09red/ssc:397122%09red/ssc:100144486%09red/ssc:396915%09red
RIG-I-like receptor signaling pathway	KEGG PATHWAY	ssc04622	9	68	0.00167898	0.0279321	ENSSSCG00000027982|ENSSSCG00000005163|ENSSSCG00000012853|ENSSSCG00000017416|ENSSSCG00000029475|ENSSSCG00000021504|ENSSSCG00000001404|ENSSSCG00000008977|ENSSSCG00000030408	ssc:100145895|ssc:445459|ssc:100037289|ssc:100524520|ssc:100622285|ssc:100310806|ssc:397086|ssc:494019|ssc:396723|	100145895|445459|100037289|100524520|100622285|100310806|397086|494019|396723|	ISG15|IFNB1, IFN-beta, IFNb|IRF7|DHX58, LGP2| |IFN-ALPHAOMEGA|TNF, TNFa|CXCL10|DDX58, RHIV-1, RIG-1, RIG-I, RLR-1|	http://www.genome.jp/kegg-bin/show_pathway?ssc04622/ssc:100037289%09red/ssc:100145895%09red/ssc:494019%09red/ssc:100622285%09red/ssc:396723%09red/ssc:397086%09red/ssc:100524520%09red/ssc:100310806%09red/ssc:445459%09red
Hepatitis B	KEGG PATHWAY	ssc05161	14	151	0.0024818	0.03667	ENSSSCG00000003395|ENSSSCG00000030839|ENSSSCG00000000396|ENSSSCG00000016520|ENSSSCG00000004895|ENSSSCG00000015801|ENSSSCG00000012853|ENSSSCG00000016057|ENSSSCG00000021964|ENSSSCG00000002383|ENSSSCG00000021504|ENSSSCG00000001404|ENSSSCG00000030408|ENSSSCG00000005163	ssc:100518131|ssc:396913|ssc:396923|ssc:100520468|ssc:100738877|ssc:100037937|ssc:100037289|ssc:396655|ssc:100514498|ssc:100144486|ssc:100310806|ssc:397086|ssc:396723|ssc:445459|	100518131|396913|396923|100520468|100738877|100037937|100037289|396655|100514498|100144486|100310806|397086|396723|445459|	PIK3CD|C-JUN, Jun|STAT2|CREB3L2| |TLR3, TLR-3|IRF7|STAT1| |FOS, c-fos|IFN-ALPHAOMEGA|TNF, TNFa|DDX58, RHIV-1, RIG-1, RIG-I, RLR-1|IFNB1, IFN-beta, IFNb|	http://www.genome.jp/kegg-bin/show_pathway?ssc05161/ssc:100520468%09red/ssc:100518131%09red/ssc:100037289%09red/ssc:396913%09red/ssc:100037937%09red/ssc:396723%09red/ssc:397086%09red/ssc:100310806%09red/ssc:100514498%09red/ssc:100738877%09red/ssc:396923%09red/ssc:100144486%09red/ssc:396655%09red/ssc:445459%09red
Pertussis	KEGG PATHWAY	ssc05133	9	73	0.00260498	0.03667	ENSSSCG00000008090|ENSSSCG00000001422|ENSSSCG00000008088|ENSSSCG00000015652|ENSSSCG00000028711|ENSSSCG00000002383|ENSSSCG00000003526|ENSSSCG00000001404|ENSSSCG00000030839	ssc:397094|ssc:448981|ssc:397122|ssc:397106|ssc:397319|ssc:100144486|ssc:100518846|ssc:397086|ssc:396913|	397094|448981|397122|397106|397319|100144486|100518846|397086|396913|	IL1A, IL-1alpha|C2|IL1B|IL10, CSIF, IL-10|CASP1|FOS, c-fos|C1QB|TNF, TNFa|C-JUN, Jun|	http://www.genome.jp/kegg-bin/show_pathway?ssc05133/ssc:397319%09red/ssc:448981%09red/ssc:396913%09red/ssc:397086%09red/ssc:397094%09red/ssc:397106%09red/ssc:100518846%09red/ssc:397122%09red/ssc:100144486%09red
NF-kappa B signaling pathway	KEGG PATHWAY	ssc04064	10	90	0.00308442	0.0403177	ENSSSCG00000004154|ENSSSCG00000004895|ENSSSCG00000008088|ENSSSCG00000017698|ENSSSCG00000029475|ENSSSCG00000010966|ENSSSCG00000027575|ENSSSCG00000001404|ENSSSCG00000009542|ENSSSCG00000030408	ssc:100622156|ssc:100738877|ssc:397122|ssc:396668|ssc:100622285|ssc:494464|ssc:100622609|ssc:397086|ssc:100038026|ssc:396723|	100622156|100738877|397122|396668|100622285|494464|100622609|397086|100038026|396723|	TNFAIP3| |IL1B|CCL4, MIP-1BETA, MIP1b, SCY4A| |CCL19|RELB|TNF, TNFa|TNFSF13B, BAFF|DDX58, RHIV-1, RIG-1, RIG-I, RLR-1|	http://www.genome.jp/kegg-bin/show_pathway?ssc04064/ssc:397122%09red/ssc:100622156%09red/ssc:100038026%09red/ssc:100622285%09red/ssc:396723%09red/ssc:397086%09red/ssc:396668%09red/ssc:100738877%09red/ssc:494464%09red/ssc:100622609%09red
Chagas disease (American trypanosomiasis)	KEGG PATHWAY	ssc05142	11	108	0.00362605	0.0430696	ENSSSCG00000017700|ENSSSCG00000003395|ENSSSCG00000005163|ENSSSCG00000017723|ENSSSCG00000008088|ENSSSCG00000015652|ENSSSCG00000021964|ENSSSCG00000002383|ENSSSCG00000003526|ENSSSCG00000001404|ENSSSCG00000030839	ssc:494459|ssc:100518131|ssc:445459|ssc:397422|ssc:397122|ssc:397106|ssc:100514498|ssc:100144486|ssc:100518846|ssc:397086|ssc:396913|	494459|100518131|445459|397422|397122|397106|100514498|100144486|100518846|397086|396913|	CCL3L1|PIK3CD|IFNB1, IFN-beta, IFNb|CCL2, MCP-1|IL1B|IL10, CSIF, IL-10| |FOS, c-fos|C1QB|TNF, TNFa|C-JUN, Jun|	http://www.genome.jp/kegg-bin/show_pathway?ssc05142/ssc:100518131%09red/ssc:397122%09red/ssc:396913%09red/ssc:397422%09red/ssc:397086%09red/ssc:397106%09red/ssc:100514498%09red/ssc:100518846%09red/ssc:494459%09red/ssc:100144486%09red/ssc:445459%09red
Leishmaniasis	KEGG PATHWAY	ssc05140	8	63	0.00376565	0.0430696	ENSSSCG00000008090|ENSSSCG00000030839|ENSSSCG00000008088|ENSSSCG00000015652|ENSSSCG00000002383|ENSSSCG00000001404|ENSSSCG00000006678|ENSSSCG00000016057	ssc:397094|ssc:396913|ssc:397122|ssc:397106|ssc:100144486|ssc:397086|ssc:613130|ssc:396655|	397094|396913|397122|397106|100144486|397086|613130|396655|	IL1A, IL-1alpha|C-JUN, Jun|IL1B|IL10, CSIF, IL-10|FOS, c-fos|TNF, TNFa|FCGR1A|STAT1|	http://www.genome.jp/kegg-bin/show_pathway?ssc05140/ssc:396913%09red/ssc:397086%09red/ssc:397094%09red/ssc:397106%09red/ssc:613130%09red/ssc:397122%09red/ssc:100144486%09red/ssc:396655%09red
Salmonella infection	KEGG PATHWAY	ssc05132	8	81	0.0143228	0.148431	ENSSSCG00000008090|ENSSSCG00000030839|ENSSSCG00000017700|ENSSSCG00000008088|ENSSSCG00000017698|ENSSSCG00000028711|ENSSSCG00000002538|ENSSSCG00000002383	ssc:397094|ssc:396913|ssc:494459|ssc:397122|ssc:396668|ssc:397319|ssc:100037291|ssc:100144486|	397094|396913|494459|397122|396668|397319|100037291|100144486|	IL1A, IL-1alpha|C-JUN, Jun|CCL3L1|IL1B|CCL4, MIP-1BETA, MIP1b, SCY4A|CASP1|DYNC1H1|FOS, c-fos|	http://www.genome.jp/kegg-bin/show_pathway?ssc05132/ssc:100037291%09red/ssc:396913%09red/ssc:397319%09red/ssc:397094%09red/ssc:396668%09red/ssc:397122%09red/ssc:494459%09red/ssc:100144486%09red
NOD-like receptor signaling pathway	KEGG PATHWAY	ssc04621	6	50	0.0145998	0.148431	ENSSSCG00000004154|ENSSSCG00000017723|ENSSSCG00000008088|ENSSSCG00000007964|ENSSSCG00000028711|ENSSSCG00000001404	ssc:100622156|ssc:397422|ssc:397122|ssc:100517333|ssc:397319|ssc:397086|	100622156|397422|397122|100517333|397319|397086|	TNFAIP3|CCL2, MCP-1|IL1B|MEFV|CASP1|TNF, TNFa|	http://www.genome.jp/kegg-bin/show_pathway?ssc04621/ssc:100517333%09red/ssc:397422%09red/ssc:397086%09red/ssc:397319%09red/ssc:100622156%09red/ssc:397122%09red
Jak-STAT signaling pathway	KEGG PATHWAY	ssc04630	12	153	0.0157185	0.151394	ENSSSCG00000016832|ENSSSCG00000027855|ENSSSCG00000000396|ENSSSCG00000002002|ENSSSCG00000015652|ENSSSCG00000003395|ENSSSCG00000021964|ENSSSCG00000022486|ENSSSCG00000021504|ENSSSCG00000009997|ENSSSCG00000016057|ENSSSCG00000005163	ssc:100271930|ssc:100307052|ssc:396923|ssc:780415|ssc:397106|ssc:100518131|ssc:100514498|ssc:100621690|ssc:100310806|ssc:100152038|ssc:396655|ssc:445459|	100271930|100307052|396923|780415|397106|100518131|100514498|100621690|100310806|100152038|396655|445459|	IL7R, CD127|SOCS1|STAT2| |IL10, CSIF, IL-10|PIK3CD| |CBLB|IFN-ALPHAOMEGA|OSM|STAT1|IFNB1, IFN-beta, IFNb|	http://www.genome.jp/kegg-bin/show_pathway?ssc04630/ssc:100518131%09red/ssc:780415%09red/ssc:100271930%09red/ssc:100152038%09red/ssc:397106%09red/ssc:100307052%09red/ssc:100310806%09red/ssc:100514498%09red/ssc:396923%09red/ssc:100621690%09red/ssc:396655%09red/ssc:445459%09red
Tuberculosis	KEGG PATHWAY	ssc05152	13	174	0.0172607	0.153832	ENSSSCG00000008090|ENSSSCG00000009123|ENSSSCG00000004895|ENSSSCG00000008088|ENSSSCG00000015652|ENSSSCG00000016057|ENSSSCG00000028637|ENSSSCG00000021504|ENSSSCG00000001404|ENSSSCG00000012890|ENSSSCG00000006678|ENSSSCG00000006625|ENSSSCG00000005163	ssc:397094|ssc:397674|ssc:100738877|ssc:397122|ssc:397106|ssc:396655|ssc:397055|ssc:100310806|ssc:397086|ssc:100521769|ssc:613130|ssc:100517711|ssc:445459|	397094|397674|100738877|397122|397106|396655|397055|100310806|397086|100521769|613130|100517711|445459|	IL1A, IL-1alpha|CAMK2D| |IL1B|IL10, CSIF, IL-10|STAT1|CYP27B1|IFN-ALPHAOMEGA|TNF, TNFa|TCIRG1|FCGR1A|RFX5|IFNB1, IFN-beta, IFNb|	http://www.genome.jp/kegg-bin/show_pathway?ssc05152/ssc:100521769%09red/ssc:397122%09red/ssc:613130%09red/ssc:397055%09red/ssc:445459%09red/ssc:397086%09red/ssc:397094%09red/ssc:397106%09red/ssc:100310806%09red/ssc:100738877%09red/ssc:100517711%09red/ssc:396655%09red/ssc:397674%09red
Colorectal cancer	KEGG PATHWAY	ssc05210	7	68	0.0176528	0.153832	ENSSSCG00000003395|ENSSSCG00000030839|ENSSSCG00000004895|ENSSSCG00000021964|ENSSSCG00000002383|ENSSSCG00000005738|ENSSSCG00000030680	ssc:100518131|ssc:396913|ssc:100738877|ssc:100514498|ssc:100144486|ssc:100513970|ssc:100170126|	100518131|396913|100738877|100514498|100144486|100513970|100170126|	PIK3CD|C-JUN, Jun| | |FOS, c-fos|RALGDS|LEF1|	http://www.genome.jp/kegg-bin/show_pathway?ssc05210/ssc:100518131%09red/ssc:100170126%09red/ssc:396913%09red/ssc:100513970%09red/ssc:100514498%09red/ssc:100738877%09red/ssc:100144486%09red
Malaria	KEGG PATHWAY	ssc05144	6	54	0.0199868	0.166254	ENSSSCG00000000423|ENSSSCG00000017723|ENSSSCG00000008088|ENSSSCG00000015652|ENSSSCG00000023150|ENSSSCG00000001404	ssc:100627964|ssc:397422|ssc:397122|ssc:397106|ssc:100514839|ssc:397086|	100627964|397422|397122|397106|100514839|397086|	LRP1|CCL2, MCP-1|IL1B|IL10, CSIF, IL-10| |TNF, TNFa|	http://www.genome.jp/kegg-bin/show_pathway?ssc05144/ssc:397422%09red/ssc:397086%09red/ssc:397106%09red/ssc:100514839%09red/ssc:397122%09red/ssc:100627964%09red
Toxoplasmosis	KEGG PATHWAY	ssc05145	9	115	0.0340558	0.262979	ENSSSCG00000030900|ENSSSCG00000003395|ENSSSCG00000027855|ENSSSCG00000024344|ENSSSCG00000004895|ENSSSCG00000015652|ENSSSCG00000021964|ENSSSCG00000001404|ENSSSCG00000016057	ssc:396801|ssc:100518131|ssc:100307052|ssc:414371|ssc:100738877|ssc:397106|ssc:100514498|ssc:397086|ssc:396655|	396801|100518131|100307052|414371|100738877|397106|100514498|397086|396655|	LDLR|PIK3CD|SOCS1|CCR5| |IL10, CSIF, IL-10| |TNF, TNFa|STAT1|	http://www.genome.jp/kegg-bin/show_pathway?ssc05145/ssc:396801%09red/ssc:100518131%09red/ssc:397086%09red/ssc:397106%09red/ssc:100307052%09red/ssc:414371%09red/ssc:100514498%09red/ssc:100738877%09red/ssc:396655%09red
Inflammatory bowel disease (IBD)	KEGG PATHWAY	ssc05321	6	62	0.0344891	0.262979	ENSSSCG00000008090|ENSSSCG00000030839|ENSSSCG00000008088|ENSSSCG00000015652|ENSSSCG00000001404|ENSSSCG00000016057	ssc:397094|ssc:396913|ssc:397122|ssc:397106|ssc:397086|ssc:396655|	397094|396913|397122|397106|397086|396655|	IL1A, IL-1alpha|C-JUN, Jun|IL1B|IL10, CSIF, IL-10|TNF, TNFa|STAT1|	http://www.genome.jp/kegg-bin/show_pathway?ssc05321/ssc:396913%09red/ssc:397086%09red/ssc:397094%09red/ssc:397106%09red/ssc:397122%09red/ssc:396655%09red
Staphylococcus aureus infection	KEGG PATHWAY	ssc05150	5	47	0.0376661	0.275716	ENSSSCG00000015652|ENSSSCG00000023868|ENSSSCG00000001422|ENSSSCG00000003526|ENSSSCG00000006678	ssc:397106|ssc:100625728|ssc:448981|ssc:100518846|ssc:613130|	397106|100625728|448981|100518846|613130|	IL10, CSIF, IL-10|C3AR1|C2|C1QB|FCGR1A|	http://www.genome.jp/kegg-bin/show_pathway?ssc05150/ssc:100625728%09red/ssc:100518846%09red/ssc:613130%09red/ssc:397106%09red/ssc:448981%09red
Type II diabetes mellitus	KEGG PATHWAY	ssc04930	5	48	0.0404137	0.28445	ENSSSCG00000021964|ENSSSCG00000001404|ENSSSCG00000007665|ENSSSCG00000027855|ENSSSCG00000003395	ssc:100514498|ssc:397086|ssc:100515824|ssc:100307052|ssc:100518131|	100514498|397086|100515824|100307052|100518131|	|TNF, TNFa| |SOCS1|PIK3CD|	http://www.genome.jp/kegg-bin/show_pathway?ssc04930/ssc:100515824%09red/ssc:100518131%09red/ssc:100514498%09red/ssc:397086%09red/ssc:100307052%09red
Prion diseases	KEGG PATHWAY	ssc05020	4	34	0.0458254	0.294844	ENSSSCG00000008090|ENSSSCG00000008088|ENSSSCG00000003526|ENSSSCG00000014336	ssc:397094|ssc:397122|ssc:100518846|ssc:100520726|	397094|397122|100518846|100520726|	IL1A, IL-1alpha|IL1B|C1QB|EGR1|	http://www.genome.jp/kegg-bin/show_pathway?ssc05020/ssc:100518846%09red/ssc:397094%09red/ssc:397122%09red/ssc:100520726%09red
African trypanosomiasis	KEGG PATHWAY	ssc05143	4	34	0.0458254	0.294844	ENSSSCG00000007007|ENSSSCG00000001404|ENSSSCG00000008088|ENSSSCG00000015652	ssc:100519877|ssc:397086|ssc:397122|ssc:397106|	100519877|397086|397122|397106|	IDO1, IDO|TNF, TNFa|IL1B|IL10, CSIF, IL-10|	http://www.genome.jp/kegg-bin/show_pathway?ssc05143/ssc:100519877%09red/ssc:397122%09red/ssc:397086%09red/ssc:397106%09red
Hematopoietic cell lineage	KEGG PATHWAY	ssc04640	7	85	0.0467239	0.294844	ENSSSCG00000008090|ENSSSCG00000016832|ENSSSCG00000008088|ENSSSCG00000026832|ENSSSCG00000001404|ENSSSCG00000006678|ENSSSCG00000003167	ssc:397094|ssc:100271930|ssc:397122|ssc:100513084|ssc:397086|ssc:613130|ssc:100322867|	397094|100271930|397122|100513084|397086|613130|100322867|	IL1A, IL-1alpha|IL7R, CD127|IL1B|CSF1, MCSFBETA|TNF, TNFa|FCGR1A|FLT3LG|	http://www.genome.jp/kegg-bin/show_pathway?ssc04640/ssc:100513084%09red/ssc:100271930%09red/ssc:397086%09red/ssc:397094%09red/ssc:100322867%09red/ssc:613130%09red/ssc:397122%09red
Graft-versus-host disease	KEGG PATHWAY	ssc05332	4	35	0.0496738	0.30301	ENSSSCG00000008090|ENSSSCG00000008088|ENSSSCG00000001341|ENSSSCG00000001404	ssc:397094|ssc:397122|ssc:100135031|ssc:397086|	397094|397122|100135031|397086|	IL1A, IL-1alpha|IL1B|SLA-2, SLA-B|TNF, TNFa|	http://www.genome.jp/kegg-bin/show_pathway?ssc05332/ssc:100135031%09red/ssc:397122%09red/ssc:397086%09red/ssc:397094%09red
Primary immunodeficiency	KEGG PATHWAY	ssc05340	4	37	0.0578858	0.339697	ENSSSCG00000020893|ENSSSCG00000016832|ENSSSCG00000025173|ENSSSCG00000006625	ssc:733649|ssc:100271930|ssc:733650|ssc:100517711|	733649|100271930|733650|100517711|	TAP1|IL7R, CD127|TAP2|RFX5|	http://www.genome.jp/kegg-bin/show_pathway?ssc05340/ssc:100271930%09red/ssc:733650%09red/ssc:100517711%09red/ssc:733649%09red
Acute myeloid leukemia	KEGG PATHWAY	ssc05221	5	54	0.0594005	0.339697	ENSSSCG00000021964|ENSSSCG00000003395|ENSSSCG00000017428|ENSSSCG00000001912|ENSSSCG00000030680	ssc:100514498|ssc:100518131|ssc:397592|ssc:100157336|ssc:100170126|	100514498|100518131|397592|100157336|100170126|	|PIK3CD|JUP|PML|LEF1|	http://www.genome.jp/kegg-bin/show_pathway?ssc05221/ssc:100518131%09red/ssc:397592%09red/ssc:100157336%09red/ssc:100514498%09red/ssc:100170126%09red
Apoptosis	KEGG PATHWAY	ssc04210	7	91	0.0617041	0.342177	ENSSSCG00000008090|ENSSSCG00000003395|ENSSSCG00000004895|ENSSSCG00000008088|ENSSSCG00000021964|ENSSSCG00000020906|ENSSSCG00000001404	ssc:397094|ssc:100518131|ssc:100738877|ssc:397122|ssc:100514498|ssc:406191|ssc:397086|	397094|100518131|100738877|397122|100514498|406191|397086|	IL1A, IL-1alpha|PIK3CD| |IL1B| |TNFSF10, TRAIL|TNF, TNFa|	http://www.genome.jp/kegg-bin/show_pathway?ssc04210/ssc:100518131%09red/ssc:397122%09red/ssc:406191%09red/ssc:397086%09red/ssc:397094%09red/ssc:100514498%09red/ssc:100738877%09red
Chemokine signaling pathway	KEGG PATHWAY	ssc04062	11	173	0.0669783	0.360501	ENSSSCG00000017700|ENSSSCG00000003395|ENSSSCG00000000396|ENSSSCG00000024344|ENSSSCG00000017723|ENSSSCG00000017721|ENSSSCG00000017698|ENSSSCG00000021964|ENSSSCG00000010966|ENSSSCG00000008977|ENSSSCG00000016057	ssc:494459|ssc:100518131|ssc:396923|ssc:414371|ssc:397422|ssc:100302703|ssc:396668|ssc:100514498|ssc:494464|ssc:494019|ssc:396655|	494459|100518131|396923|414371|397422|100302703|396668|100514498|494464|494019|396655|	CCL3L1|PIK3CD|STAT2|CCR5|CCL2, MCP-1|CCL8|CCL4, MIP-1BETA, MIP1b, SCY4A| |CCL19|CXCL10|STAT1|	http://www.genome.jp/kegg-bin/show_pathway?ssc04062/ssc:100518131%09red/ssc:100302703%09red/ssc:397422%09red/ssc:494019%09red/ssc:414371%09red/ssc:396668%09red/ssc:100514498%09red/ssc:494464%09red/ssc:396923%09red/ssc:396655%09red/ssc:494459%09red
Type I diabetes mellitus	KEGG PATHWAY	ssc04940	4	42	0.0813515	0.425352	ENSSSCG00000008090|ENSSSCG00000008088|ENSSSCG00000001341|ENSSSCG00000001404	ssc:397094|ssc:397122|ssc:100135031|ssc:397086|	397094|397122|100135031|397086|	IL1A, IL-1alpha|IL1B|SLA-2, SLA-B|TNF, TNFa|	http://www.genome.jp/kegg-bin/show_pathway?ssc04940/ssc:100135031%09red/ssc:397122%09red/ssc:397086%09red/ssc:397094%09red
Notch signaling pathway	KEGG PATHWAY	ssc04330	4	44	0.0918663	0.462247	ENSSSCG00000011876|ENSSSCG00000009761|ENSSSCG00000007067|ENSSSCG00000026362	ssc:100520459|ssc:733643|ssc:100156773|ssc:100499567|	100520459|733643|100156773|100499567|	DTX3L| |JAG1|HES1|	http://www.genome.jp/kegg-bin/show_pathway?ssc04330/ssc:100520459%09red/ssc:100499567%09red/ssc:100156773%09red/ssc:733643%09red
Pancreatic cancer	KEGG PATHWAY	ssc05212	5	63	0.0958752	0.462247	ENSSSCG00000021964|ENSSSCG00000003395|ENSSSCG00000005738|ENSSSCG00000001695|ENSSSCG00000016057	ssc:100514498|ssc:100518131|ssc:100513970|ssc:397157|ssc:396655|	100514498|100518131|100513970|397157|396655|	|PIK3CD|RALGDS|VEGFA, VEGF|STAT1|	http://www.genome.jp/kegg-bin/show_pathway?ssc05212/ssc:100518131%09red/ssc:396655%09red/ssc:100514498%09red/ssc:100513970%09red/ssc:397157%09red
Systemic lupus erythematosus	KEGG PATHWAY	ssc05322	7	102	0.0959858	0.462247	ENSSSCG00000001422|ENSSSCG00000015652|ENSSSCG00000003526|ENSSSCG00000014780|ENSSSCG00000001404|ENSSSCG00000006678|ENSSSCG00000017202	ssc:448981|ssc:397106|ssc:100518846|ssc:100302538|ssc:397086|ssc:613130|ssc:396970|	448981|397106|100518846|100302538|397086|613130|396970|	C2|IL10, CSIF, IL-10|C1QB|TRIM21|TNF, TNFa|FCGR1A|H3F3A|	http://www.genome.jp/kegg-bin/show_pathway?ssc05322/ssc:448981%09red/ssc:397086%09red/ssc:397106%09red/ssc:613130%09red/ssc:100518846%09red/ssc:100302538%09red/ssc:396970%09red
Viral carcinogenesis	KEGG PATHWAY	ssc05203	11	189	0.104766	0.479303	ENSSSCG00000003395|ENSSSCG00000002002|ENSSSCG00000024344|ENSSSCG00000003488|ENSSSCG00000012853|ENSSSCG00000001341|ENSSSCG00000021964|ENSSSCG00000025181|ENSSSCG00000016520|ENSSSCG00000026454|ENSSSCG00000030839	ssc:100518131|ssc:780415|ssc:414371|ssc:100511934|ssc:100037289|ssc:100135031|ssc:100514498|ssc:100523731|ssc:100520468|ssc:397278|ssc:396913|	100518131|780415|414371|100511934|100037289|100135031|100514498|100523731|100520468|397278|396913|	PIK3CD| |CCR5|UBR4|IRF7|SLA-2, SLA-B| | |CREB3L2|PMAIP1, TN3|C-JUN, Jun|	http://www.genome.jp/kegg-bin/show_pathway?ssc05203/ssc:100520468%09red/ssc:100518131%09red/ssc:100037289%09red/ssc:100514498%09red/ssc:100523731%09red/ssc:396913%09red/ssc:100135031%09red/ssc:414371%09red/ssc:100511934%09red/ssc:397278%09red/ssc:780415%09red
Epstein-Barr virus infection	KEGG PATHWAY	ssc05169	11	189	0.104766	0.479303	ENSSSCG00000004154|ENSSSCG00000003395|ENSSSCG00000030839|ENSSSCG00000004895|ENSSSCG00000015652|ENSSSCG00000001341|ENSSSCG00000021964|ENSSSCG00000025181|ENSSSCG00000009761|ENSSSCG00000027575|ENSSSCG00000030408	ssc:100622156|ssc:100518131|ssc:396913|ssc:100738877|ssc:397106|ssc:100135031|ssc:100514498|ssc:100523731|ssc:733643|ssc:100622609|ssc:396723|	100622156|100518131|396913|100738877|397106|100135031|100514498|100523731|733643|100622609|396723|	TNFAIP3|PIK3CD|C-JUN, Jun| |IL10, CSIF, IL-10|SLA-2, SLA-B| | | |RELB|DDX58, RHIV-1, RIG-1, RIG-I, RLR-1|	http://www.genome.jp/kegg-bin/show_pathway?ssc05169/ssc:100518131%09red/ssc:100523731%09red/ssc:396913%09red/ssc:396723%09red/ssc:100135031%09red/ssc:397106%09red/ssc:733643%09red/ssc:100622156%09red/ssc:100514498%09red/ssc:100738877%09red/ssc:100622609%09red
T cell receptor signaling pathway	KEGG PATHWAY	ssc04660	7	107	0.114448	0.501181	ENSSSCG00000003395|ENSSSCG00000030839|ENSSSCG00000015652|ENSSSCG00000021964|ENSSSCG00000022486|ENSSSCG00000002383|ENSSSCG00000001404	ssc:100518131|ssc:396913|ssc:397106|ssc:100514498|ssc:100621690|ssc:100144486|ssc:397086|	100518131|396913|397106|100514498|100621690|100144486|397086|	PIK3CD|C-JUN, Jun|IL10, CSIF, IL-10| |CBLB|FOS, c-fos|TNF, TNFa|	http://www.genome.jp/kegg-bin/show_pathway?ssc04660/ssc:100518131%09red/ssc:396913%09red/ssc:100621690%09red/ssc:397086%09red/ssc:397106%09red/ssc:100514498%09red/ssc:100144486%09red
Prolactin signaling pathway	KEGG PATHWAY	ssc04917	5	67	0.115025	0.501181	ENSSSCG00000021964|ENSSSCG00000003395|ENSSSCG00000027855|ENSSSCG00000002383|ENSSSCG00000016057	ssc:100514498|ssc:100518131|ssc:100307052|ssc:100144486|ssc:396655|	100514498|100518131|100307052|100144486|396655|	|PIK3CD|SOCS1|FOS, c-fos|STAT1|	http://www.genome.jp/kegg-bin/show_pathway?ssc04917/ssc:100518131%09red/ssc:396655%09red/ssc:100514498%09red/ssc:100307052%09red/ssc:100144486%09red
Antigen processing and presentation	KEGG PATHWAY	ssc04612	5	68	0.120078	0.51103	ENSSSCG00000001404|ENSSSCG00000020893|ENSSSCG00000025173|ENSSSCG00000006625|ENSSSCG00000001341	ssc:397086|ssc:733649|ssc:733650|ssc:100517711|ssc:100135031|	397086|733649|733650|100517711|100135031|	TNF, TNFa|TAP1|TAP2|RFX5|SLA-2, SLA-B|	http://www.genome.jp/kegg-bin/show_pathway?ssc04612/ssc:100135031%09red/ssc:397086%09red/ssc:733650%09red/ssc:100517711%09red/ssc:733649%09red
Complement and coagulation cascades	KEGG PATHWAY	ssc04610	5	73	0.146834	0.610696	ENSSSCG00000007115|ENSSSCG00000006289|ENSSSCG00000023868|ENSSSCG00000001422|ENSSSCG00000003526	ssc:100157642|ssc:397217|ssc:100625728|ssc:448981|ssc:100518846|	100157642|397217|100625728|448981|100518846|	THBD|F5|C3AR1|C2|C1QB|	http://www.genome.jp/kegg-bin/show_pathway?ssc04610/ssc:397217%09red/ssc:100625728%09red/ssc:100518846%09red/ssc:100157642%09red/ssc:448981%09red
Amyotrophic lateral sclerosis (ALS)	KEGG PATHWAY	ssc05014	4	55	0.159832	0.649982	ENSSSCG00000004895|ENSSSCG00000001404|ENSSSCG00000001509|ENSSSCG00000028711	ssc:100738877|ssc:397086|ssc:100524813|ssc:397319|	100738877|397086|100524813|397319|	|TNF, TNFa|DAXX|CASP1|	http://www.genome.jp/kegg-bin/show_pathway?ssc05014/ssc:100738877%09red/ssc:397086%09red/ssc:397319%09red/ssc:100524813%09red
Allograft rejection	KEGG PATHWAY	ssc05330	3	38	0.180076	0.71639	ENSSSCG00000001404|ENSSSCG00000015652|ENSSSCG00000001341	ssc:397086|ssc:397106|ssc:100135031|	397086|397106|100135031|	TNF, TNFa|IL10, CSIF, IL-10|SLA-2, SLA-B|	http://www.genome.jp/kegg-bin/show_pathway?ssc05330/ssc:100135031%09red/ssc:397086%09red/ssc:397106%09red
Fc gamma R-mediated phagocytosis	KEGG PATHWAY	ssc04666	5	81	0.194252	0.737728	ENSSSCG00000021964|ENSSSCG00000028108|ENSSSCG00000003395|ENSSSCG00000006678|ENSSSCG00000026443	ssc:100514498|ssc:100626125|ssc:100518131|ssc:613130|ssc:100624272|	100514498|100626125|100518131|613130|100624272|	|ASAP3|PIK3CD|FCGR1A|PIP5K1A|	http://www.genome.jp/kegg-bin/show_pathway?ssc04666/ssc:100518131%09red/ssc:613130%09red/ssc:100514498%09red/ssc:100624272%09red/ssc:100626125%09red
mTOR signaling pathway	KEGG PATHWAY	ssc04150	4	60	0.195417	0.737728	ENSSSCG00000021964|ENSSSCG00000001404|ENSSSCG00000003395|ENSSSCG00000001695	ssc:100514498|ssc:397086|ssc:100518131|ssc:397157|	100514498|397086|100518131|397157|	|TNF, TNFa|PIK3CD|VEGFA, VEGF|	http://www.genome.jp/kegg-bin/show_pathway?ssc04150/ssc:100518131%09red/ssc:100514498%09red/ssc:397086%09red/ssc:397157%09red
HIF-1 signaling pathway	KEGG PATHWAY	ssc04066	6	104	0.201093	0.737728	ENSSSCG00000003395|ENSSSCG00000009123|ENSSSCG00000001050|ENSSSCG00000004895|ENSSSCG00000021964|ENSSSCG00000001695	ssc:100518131|ssc:397674|ssc:396915|ssc:100738877|ssc:100514498|ssc:397157|	100518131|397674|396915|100738877|100514498|397157|	PIK3CD|CAMK2D|EDN1, EDN, ET-1, ET1, PPET1| | |VEGFA, VEGF|	http://www.genome.jp/kegg-bin/show_pathway?ssc04066/ssc:100518131%09red/ssc:397157%09red/ssc:396915%09red/ssc:100514498%09red/ssc:100738877%09red/ssc:397674%09red
Prostate cancer	KEGG PATHWAY	ssc05215	5	85	0.219738	0.737728	ENSSSCG00000004895|ENSSSCG00000021964|ENSSSCG00000003395|ENSSSCG00000016520|ENSSSCG00000030680	ssc:100738877|ssc:100514498|ssc:100518131|ssc:100520468|ssc:100170126|	100738877|100514498|100518131|100520468|100170126|	| |PIK3CD|CREB3L2|LEF1|	http://www.genome.jp/kegg-bin/show_pathway?ssc05215/ssc:100520468%09red/ssc:100518131%09red/ssc:100514498%09red/ssc:100738877%09red/ssc:100170126%09red
ErbB signaling pathway	KEGG PATHWAY	ssc04012	5	85	0.219738	0.737728	ENSSSCG00000021964|ENSSSCG00000003395|ENSSSCG00000022486|ENSSSCG00000009123|ENSSSCG00000030839	ssc:100514498|ssc:100518131|ssc:100621690|ssc:397674|ssc:396913|	100514498|100518131|100621690|397674|396913|	|PIK3CD|CBLB|CAMK2D|C-JUN, Jun|	http://www.genome.jp/kegg-bin/show_pathway?ssc04012/ssc:100518131%09red/ssc:397674%09red/ssc:100514498%09red/ssc:396913%09red/ssc:100621690%09red
Natural killer cell mediated cytotoxicity	KEGG PATHWAY	ssc04650	6	108	0.2238	0.737728	ENSSSCG00000003395|ENSSSCG00000005163|ENSSSCG00000021964|ENSSSCG00000021504|ENSSSCG00000020906|ENSSSCG00000001404	ssc:100518131|ssc:445459|ssc:100514498|ssc:100310806|ssc:406191|ssc:397086|	100518131|445459|100514498|100310806|406191|397086|	PIK3CD|IFNB1, IFN-beta, IFNb| |IFN-ALPHAOMEGA|TNFSF10, TRAIL|TNF, TNFa|	http://www.genome.jp/kegg-bin/show_pathway?ssc04650/ssc:100518131%09red/ssc:406191%09red/ssc:397086%09red/ssc:100310806%09red/ssc:100514498%09red/ssc:445459%09red
Renal cell carcinoma	KEGG PATHWAY	ssc05211	4	64	0.225457	0.737728	ENSSSCG00000021964|ENSSSCG00000003395|ENSSSCG00000001695|ENSSSCG00000030839	ssc:100514498|ssc:100518131|ssc:397157|ssc:396913|	100514498|100518131|397157|396913|	|PIK3CD|VEGFA, VEGF|C-JUN, Jun|	http://www.genome.jp/kegg-bin/show_pathway?ssc05211/ssc:100518131%09red/ssc:100514498%09red/ssc:396913%09red/ssc:397157%09red
MAPK signaling pathway	KEGG PATHWAY	ssc04010	12	249	0.226208	0.737728	ENSSSCG00000008090|ENSSSCG00000015850|ENSSSCG00000030839|ENSSSCG00000008088|ENSSSCG00000010624|ENSSSCG00000016991|ENSSSCG00000010831|ENSSSCG00000002383|ENSSSCG00000003140|ENSSSCG00000027575|ENSSSCG00000001404|ENSSSCG00000001509	ssc:397094|ssc:100514374|ssc:396913|ssc:397122|ssc:100157144|ssc:100522469|ssc:100517416|ssc:100144486|ssc:100302504|ssc:100622609|ssc:397086|ssc:100524813|	397094|100514374|396913|397122|100157144|100522469|100517416|100144486|100302504|100622609|397086|100524813|	IL1A, IL-1alpha|DUSP4|C-JUN, Jun|IL1B|DUSP5|DUSP1, MKP1|DUSP10|FOS, c-fos|FGF21|RELB|TNF, TNFa|DAXX|	http://www.genome.jp/kegg-bin/show_pathway?ssc04010/ssc:100517416%09red/ssc:100522469%09red/ssc:396913%09red/ssc:100514374%09red/ssc:397086%09red/ssc:397094%09red/ssc:100157144%09red/ssc:397122%09red/ssc:100144486%09red/ssc:100622609%09red/ssc:100302504%09red/ssc:100524813%09red
ABC transporters	KEGG PATHWAY	ssc02010	3	43	0.226437	0.737728	ENSSSCG00000020893|ENSSSCG00000002362|ENSSSCG00000025173	ssc:733649|ssc:100152503|ssc:733650|	733649|100152503|733650|	TAP1| |TAP2|	http://www.genome.jp/kegg-bin/show_pathway?ssc02010/ssc:100152503%09red/ssc:733650%09red/ssc:733649%09red
Vasopressin-regulated water reabsorption	KEGG PATHWAY	ssc04962	3	43	0.226437	0.737728	ENSSSCG00000010991|ENSSSCG00000002538|ENSSSCG00000016520	ssc:100126235|ssc:100037291|ssc:100520468|	100126235|100037291|100520468|	AQP3, SAQP3|DYNC1H1|CREB3L2|	http://www.genome.jp/kegg-bin/show_pathway?ssc04962/ssc:100520468%09red/ssc:100037291%09red/ssc:100126235%09red
Amphetamine addiction	KEGG PATHWAY	ssc05031	4	65	0.233147	0.737728	ENSSSCG00000002383|ENSSSCG00000009123|ENSSSCG00000016520|ENSSSCG00000030839	ssc:100144486|ssc:397674|ssc:100520468|ssc:396913|	100144486|397674|100520468|396913|	FOS, c-fos|CAMK2D|CREB3L2|C-JUN, Jun|	http://www.genome.jp/kegg-bin/show_pathway?ssc05031/ssc:100520468%09red/ssc:397674%09red/ssc:396913%09red/ssc:100144486%09red
FoxO signaling pathway	KEGG PATHWAY	ssc04068	7	133	0.235535	0.737728	ENSSSCG00000003395|ENSSSCG00000015652|ENSSSCG00000016832|ENSSSCG00000021964|ENSSSCG00000020906|ENSSSCG00000007665|ENSSSCG00000016925	ssc:100518131|ssc:397106|ssc:100271930|ssc:100514498|ssc:406191|ssc:100515824|ssc:397251|	100518131|397106|100271930|100514498|406191|100515824|397251|	PIK3CD|IL10, CSIF, IL-10|IL7R, CD127| |TNFSF10, TRAIL| |PLK2|	http://www.genome.jp/kegg-bin/show_pathway?ssc04068/ssc:100518131%09red/ssc:100271930%09red/ssc:397251%09red/ssc:397106%09red/ssc:100514498%09red/ssc:100515824%09red/ssc:406191%09red
Asthma	KEGG PATHWAY	ssc05310	2	24	0.237847	0.737728	ENSSSCG00000001404|ENSSSCG00000015652	ssc:397086|ssc:397106|	397086|397106|	TNF, TNFa|IL10, CSIF, IL-10|	http://www.genome.jp/kegg-bin/show_pathway?ssc05310/ssc:397086%09red/ssc:397106%09red
Cholinergic synapse	KEGG PATHWAY	ssc04725	6	113	0.253278	0.772496	ENSSSCG00000003395|ENSSSCG00000009123|ENSSSCG00000004895|ENSSSCG00000021964|ENSSSCG00000002383|ENSSSCG00000016520	ssc:100518131|ssc:397674|ssc:100738877|ssc:100514498|ssc:100144486|ssc:100520468|	100518131|397674|100738877|100514498|100144486|100520468|	PIK3CD|CAMK2D| | |FOS, c-fos|CREB3L2|	http://www.genome.jp/kegg-bin/show_pathway?ssc04725/ssc:100520468%09red/ssc:100518131%09red/ssc:100514498%09red/ssc:100738877%09red/ssc:100144486%09red/ssc:397674%09red
Circadian rhythm	KEGG PATHWAY	ssc04710	2	26	0.264632	0.793895	ENSSSCG00000013270|ENSSSCG00000017983	ssc:100517750|ssc:100620648|	100517750|100620648|	CRY2|PER1|	http://www.genome.jp/kegg-bin/show_pathway?ssc04710/ssc:100517750%09red/ssc:100620648%09red
RNA degradation	KEGG PATHWAY	ssc03018	4	71	0.280441	0.810777	ENSSSCG00000030404|ENSSSCG00000008399|ENSSSCG00000022880|ENSSSCG00000025233	ssc:100625961|ssc:100642182|ssc:100642182|ssc:100642182|	100625961|100642182|100642182|100642182|	PAPD5|PNPT1|PNPT1|PNPT1|	http://www.genome.jp/kegg-bin/show_pathway?ssc03018/ssc:100642182%09red/ssc:100625961%09red
Endometrial cancer	KEGG PATHWAY	ssc05213	3	49	0.284529	0.810777	ENSSSCG00000021964|ENSSSCG00000003395|ENSSSCG00000030680	ssc:100514498|ssc:100518131|ssc:100170126|	100514498|100518131|100170126|	|PIK3CD|LEF1|	http://www.genome.jp/kegg-bin/show_pathway?ssc05213/ssc:100518131%09red/ssc:100514498%09red/ssc:100170126%09red
Melanogenesis	KEGG PATHWAY	ssc04916	5	95	0.287207	0.810777	ENSSSCG00000001050|ENSSSCG00000009477|ENSSSCG00000009123|ENSSSCG00000016520|ENSSSCG00000030680	ssc:396915|ssc:414911|ssc:397674|ssc:100520468|ssc:100170126|	396915|414911|397674|100520468|100170126|	EDN1, EDN, ET-1, ET1, PPET1|EDNRB, ETB|CAMK2D|CREB3L2|LEF1|	http://www.genome.jp/kegg-bin/show_pathway?ssc04916/ssc:100520468%09red/ssc:414911%09red/ssc:396915%09red/ssc:100170126%09red/ssc:397674%09red
B cell receptor signaling pathway	KEGG PATHWAY	ssc04662	4	72	0.288474	0.810777	ENSSSCG00000021964|ENSSSCG00000003395|ENSSSCG00000002383|ENSSSCG00000030839	ssc:100514498|ssc:100518131|ssc:100144486|ssc:396913|	100514498|100518131|100144486|396913|	|PIK3CD|FOS, c-fos|C-JUN, Jun|	http://www.genome.jp/kegg-bin/show_pathway?ssc04662/ssc:100518131%09red/ssc:100514498%09red/ssc:396913%09red/ssc:100144486%09red
Estrogen signaling pathway	KEGG PATHWAY	ssc04915	5	97	0.301163	0.810777	ENSSSCG00000021964|ENSSSCG00000003395|ENSSSCG00000002383|ENSSSCG00000030839|ENSSSCG00000016520	ssc:100514498|ssc:100518131|ssc:100144486|ssc:396913|ssc:100520468|	100514498|100518131|100144486|396913|100520468|	|PIK3CD|FOS, c-fos|C-JUN, Jun|CREB3L2|	http://www.genome.jp/kegg-bin/show_pathway?ssc04915/ssc:100520468%09red/ssc:100518131%09red/ssc:100514498%09red/ssc:396913%09red/ssc:100144486%09red
Steroid hormone biosynthesis	KEGG PATHWAY	ssc00140	3	51	0.304202	0.810777	ENSSSCG00000030456|ENSSSCG00000021395|ENSSSCG00000026798	ssc:100625479|ssc:100126281|ssc:403111|	100625479|100126281|403111|	|CYP3A46, CYP3A88|CYP2C42|	http://www.genome.jp/kegg-bin/show_pathway?ssc00140/ssc:100625479%09red/ssc:100126281%09red/ssc:403111%09red
Autoimmune thyroid disease	KEGG PATHWAY	ssc05320	3	51	0.304202	0.810777	ENSSSCG00000015652|ENSSSCG00000021504|ENSSSCG00000001341	ssc:397106|ssc:100310806|ssc:100135031|	397106|100310806|100135031|	IL10, CSIF, IL-10|IFN-ALPHAOMEGA|SLA-2, SLA-B|	http://www.genome.jp/kegg-bin/show_pathway?ssc05320/ssc:100310806%09red/ssc:100135031%09red/ssc:397106%09red
Pathways in cancer	KEGG PATHWAY	ssc05200	14	319	0.305703	0.810777	ENSSSCG00000003395|ENSSSCG00000005738|ENSSSCG00000017428|ENSSSCG00000030839|ENSSSCG00000004895|ENSSSCG00000016057|ENSSSCG00000021964|ENSSSCG00000002383|ENSSSCG00000001695|ENSSSCG00000003140|ENSSSCG00000022486|ENSSSCG00000030680|ENSSSCG00000001912|ENSSSCG00000003167	ssc:100518131|ssc:100513970|ssc:397592|ssc:396913|ssc:100738877|ssc:396655|ssc:100514498|ssc:100144486|ssc:397157|ssc:100302504|ssc:100621690|ssc:100170126|ssc:100157336|ssc:100322867|	100518131|100513970|397592|396913|100738877|396655|100514498|100144486|397157|100302504|100621690|100170126|100157336|100322867|	PIK3CD|RALGDS|JUP|C-JUN, Jun| |STAT1| |FOS, c-fos|VEGFA, VEGF|FGF21|CBLB|LEF1|PML|FLT3LG|	http://www.genome.jp/kegg-bin/show_pathway?ssc05200/ssc:100518131%09red/ssc:100513970%09red/ssc:100170126%09red/ssc:397157%09red/ssc:100621690%09red/ssc:396913%09red/ssc:100157336%09red/ssc:100514498%09red/ssc:100322867%09red/ssc:397592%09red/ssc:100738877%09red/ssc:100144486%09red/ssc:396655%09red/ssc:100302504%09red
Phagosome	KEGG PATHWAY	ssc04145	7	147	0.313258	0.818945	ENSSSCG00000001341|ENSSSCG00000020893|ENSSSCG00000000773|ENSSSCG00000002538|ENSSSCG00000012890|ENSSSCG00000006678|ENSSSCG00000025173	ssc:100135031|ssc:733649|ssc:100518253|ssc:100037291|ssc:100521769|ssc:613130|ssc:733650|	100135031|733649|100518253|100037291|100521769|613130|733650|	SLA-2, SLA-B|TAP1|TUBA8|DYNC1H1|TCIRG1|FCGR1A|TAP2|	http://www.genome.jp/kegg-bin/show_pathway?ssc04145/ssc:100521769%09red/ssc:100518253%09red/ssc:733649%09red/ssc:100037291%09red/ssc:100135031%09red/ssc:733650%09red/ssc:613130%09red
Pyrimidine metabolism	KEGG PATHWAY	ssc00240	5	101	0.329362	0.848919	ENSSSCG00000025233|ENSSSCG00000022912|ENSSSCG00000008399|ENSSSCG00000022880|ENSSSCG00000008647	ssc:100642182|ssc:100623678|ssc:100642182|ssc:100642182|ssc:100623872|	100642182|100623678|100642182|100642182|100623872|	PNPT1|NT5C3A|PNPT1|PNPT1|CMPK2|	http://www.genome.jp/kegg-bin/show_pathway?ssc00240/ssc:100642182%09red/ssc:100623872%09red/ssc:100623678%09red
Linoleic acid metabolism	KEGG PATHWAY	ssc00591	2	32	0.344484	0.875564	ENSSSCG00000021395|ENSSSCG00000026798	ssc:100126281|ssc:403111|	100126281|403111|	CYP3A46, CYP3A88|CYP2C42|	http://www.genome.jp/kegg-bin/show_pathway?ssc00591/ssc:100126281%09red/ssc:403111%09red
Amoebiasis	KEGG PATHWAY	ssc05146	5	107	0.372059	0.922758	ENSSSCG00000021964|ENSSSCG00000001404|ENSSSCG00000008088|ENSSSCG00000015652|ENSSSCG00000003395	ssc:100514498|ssc:397086|ssc:397122|ssc:397106|ssc:100518131|	100514498|397086|397122|397106|100518131|	|TNF, TNFa|IL1B|IL10, CSIF, IL-10|PIK3CD|	http://www.genome.jp/kegg-bin/show_pathway?ssc05146/ssc:100518131%09red/ssc:100514498%09red/ssc:397122%09red/ssc:397086%09red/ssc:397106%09red
VEGF signaling pathway	KEGG PATHWAY	ssc04370	3	58	0.373137	0.922758	ENSSSCG00000021964|ENSSSCG00000003395|ENSSSCG00000001695	ssc:100514498|ssc:100518131|ssc:397157|	100514498|100518131|397157|	|PIK3CD|VEGFA, VEGF|	http://www.genome.jp/kegg-bin/show_pathway?ssc04370/ssc:100518131%09red/ssc:100514498%09red/ssc:397157%09red
Ubiquitin mediated proteolysis	KEGG PATHWAY	ssc04120	6	134	0.38505	0.932032	ENSSSCG00000023379|ENSSSCG00000027855|ENSSSCG00000011393|ENSSSCG00000022486|ENSSSCG00000021766|ENSSSCG00000001912	ssc:100514753|ssc:100307052|ssc:100512631|ssc:100621690|ssc:100517903|ssc:100157336|	100514753|100307052|100512631|100621690|100517903|100157336|	UBE2L6|SOCS1|UBA7|CBLB|HERC3|PML|	http://www.genome.jp/kegg-bin/show_pathway?ssc04120/ssc:100514753%09red/ssc:100517903%09red/ssc:100621690%09red/ssc:100157336%09red/ssc:100307052%09red/ssc:100512631%09red
Chemical carcinogenesis	KEGG PATHWAY	ssc05204	3	60	0.392652	0.932032	ENSSSCG00000030456|ENSSSCG00000021395|ENSSSCG00000026798	ssc:100625479|ssc:100126281|ssc:403111|	100625479|100126281|403111|	|CYP3A46, CYP3A88|CYP2C42|	http://www.genome.jp/kegg-bin/show_pathway?ssc05204/ssc:100625479%09red/ssc:100126281%09red/ssc:403111%09red
Inflammatory mediator regulation of TRP channels	KEGG PATHWAY	ssc04750	5	110	0.39344	0.932032	ENSSSCG00000021964|ENSSSCG00000003395|ENSSSCG00000008088|ENSSSCG00000009123|ENSSSCG00000026798	ssc:100514498|ssc:100518131|ssc:397122|ssc:397674|ssc:403111|	100514498|100518131|397122|397674|403111|	|PIK3CD|IL1B|CAMK2D|CYP2C42|	http://www.genome.jp/kegg-bin/show_pathway?ssc04750/ssc:100518131%09red/ssc:397674%09red/ssc:100514498%09red/ssc:397122%09red/ssc:403111%09red
Folate biosynthesis	KEGG PATHWAY	ssc00790	1	13	0.399442	0.932032	ENSSSCG00000005626	ssc:100736908|	100736908|	FPGS|	http://www.genome.jp/kegg-bin/show_pathway?ssc00790/ssc:100736908%09red
Glioma	KEGG PATHWAY	ssc05214	3	61	0.402352	0.932032	ENSSSCG00000021964|ENSSSCG00000003395|ENSSSCG00000009123	ssc:100514498|ssc:100518131|ssc:397674|	100514498|100518131|397674|	|PIK3CD|CAMK2D|	http://www.genome.jp/kegg-bin/show_pathway?ssc05214/ssc:100518131%09red/ssc:397674%09red/ssc:100514498%09red
Glycosphingolipid biosynthesis - ganglio series	KEGG PATHWAY	ssc00604	1	14	0.420928	0.952534	ENSSSCG00000005943	ssc:445537|	445537|	ST3GAL1, SIAT4A|	http://www.genome.jp/kegg-bin/show_pathway?ssc00604/ssc:445537%09red
Fc epsilon RI signaling pathway	KEGG PATHWAY	ssc04664	3	63	0.421614	0.952534	ENSSSCG00000021964|ENSSSCG00000001404|ENSSSCG00000003395	ssc:100514498|ssc:397086|ssc:100518131|	100514498|397086|100518131|	|TNF, TNFa|PIK3CD|	http://www.genome.jp/kegg-bin/show_pathway?ssc04664/ssc:100518131%09red/ssc:100514498%09red/ssc:397086%09red
Legionellosis	KEGG PATHWAY	ssc05134	3	64	0.431166	0.962236	ENSSSCG00000001404|ENSSSCG00000008088|ENSSSCG00000028711	ssc:397086|ssc:397122|ssc:397319|	397086|397122|397319|	TNF, TNFa|IL1B|CASP1|	http://www.genome.jp/kegg-bin/show_pathway?ssc05134/ssc:397122%09red/ssc:397086%09red/ssc:397319%09red
Glycosphingolipid biosynthesis - globo series	KEGG PATHWAY	ssc00603	1	15	0.441646	0.963449	ENSSSCG00000005943	ssc:445537|	445537|	ST3GAL1, SIAT4A|	http://www.genome.jp/kegg-bin/show_pathway?ssc00603/ssc:445537%09red
AMPK signaling pathway	KEGG PATHWAY	ssc04152	5	118	0.449998	0.963449	ENSSSCG00000021964|ENSSSCG00000012880|ENSSSCG00000007665|ENSSSCG00000003395|ENSSSCG00000016520	ssc:100514498|ssc:399527|ssc:100515824|ssc:100518131|ssc:100520468|	100514498|399527|100515824|100518131|100520468|	|CPT1A, CPT1, L-CPTI| |PIK3CD|CREB3L2|	http://www.genome.jp/kegg-bin/show_pathway?ssc04152/ssc:100520468%09red/ssc:100515824%09red/ssc:100514498%09red/ssc:100518131%09red/ssc:399527%09red
Neurotrophin signaling pathway	KEGG PATHWAY	ssc04722	5	118	0.449998	0.963449	ENSSSCG00000004895|ENSSSCG00000021964|ENSSSCG00000003395|ENSSSCG00000009123|ENSSSCG00000030839	ssc:100738877|ssc:100514498|ssc:100518131|ssc:397674|ssc:396913|	100738877|100514498|100518131|397674|396913|	| |PIK3CD|CAMK2D|C-JUN, Jun|	http://www.genome.jp/kegg-bin/show_pathway?ssc04722/ssc:100518131%09red/ssc:397674%09red/ssc:100514498%09red/ssc:100738877%09red/ssc:396913%09red
Aldosterone-regulated sodium reabsorption	KEGG PATHWAY	ssc04960	2	41	0.458033	0.963449	ENSSSCG00000021964|ENSSSCG00000003395	ssc:100514498|ssc:100518131|	100514498|100518131|	|PIK3CD|	http://www.genome.jp/kegg-bin/show_pathway?ssc04960/ssc:100518131%09red/ssc:100514498%09red
Tryptophan metabolism	KEGG PATHWAY	ssc00380	2	41	0.458033	0.963449	ENSSSCG00000007007|ENSSSCG00000030456	ssc:100519877|ssc:100625479|	100519877|100625479|	IDO1, IDO| |	http://www.genome.jp/kegg-bin/show_pathway?ssc00380/ssc:100625479%09red/ssc:100519877%09red
Carbohydrate digestion and absorption	KEGG PATHWAY	ssc04973	2	42	0.469959	0.967061	ENSSSCG00000021964|ENSSSCG00000003395	ssc:100514498|ssc:100518131|	100514498|100518131|	|PIK3CD|	http://www.genome.jp/kegg-bin/show_pathway?ssc04973/ssc:100518131%09red/ssc:100514498%09red
Melanoma	KEGG PATHWAY	ssc05218	3	69	0.477982	0.967061	ENSSSCG00000021964|ENSSSCG00000003395|ENSSSCG00000003140	ssc:100514498|ssc:100518131|ssc:100302504|	100514498|100518131|100302504|	|PIK3CD|FGF21|	http://www.genome.jp/kegg-bin/show_pathway?ssc05218/ssc:100518131%09red/ssc:100514498%09red/ssc:100302504%09red
Chronic myeloid leukemia	KEGG PATHWAY	ssc05220	3	69	0.477982	0.967061	ENSSSCG00000021964|ENSSSCG00000003395|ENSSSCG00000022486	ssc:100514498|ssc:100518131|ssc:100621690|	100514498|100518131|100621690|	|PIK3CD|CBLB|	http://www.genome.jp/kegg-bin/show_pathway?ssc05220/ssc:100518131%09red/ssc:100621690%09red/ssc:100514498%09red
Glycosaminoglycan biosynthesis - keratan sulfate	KEGG PATHWAY	ssc00533	1	17	0.480888	0.967061	ENSSSCG00000005943	ssc:445537|	445537|	ST3GAL1, SIAT4A|	http://www.genome.jp/kegg-bin/show_pathway?ssc00533/ssc:445537%09red
Adipocytokine signaling pathway	KEGG PATHWAY	ssc04920	3	70	0.487132	0.96897	ENSSSCG00000001404|ENSSSCG00000007665|ENSSSCG00000012880	ssc:397086|ssc:100515824|ssc:399527|	397086|100515824|399527|	TNF, TNFa| |CPT1A, CPT1, L-CPTI|	http://www.genome.jp/kegg-bin/show_pathway?ssc04920/ssc:100515824%09red/ssc:399527%09red/ssc:397086%09red
Intestinal immune network for IgA production	KEGG PATHWAY	ssc04672	2	44	0.493329	0.970745	ENSSSCG00000009542|ENSSSCG00000015652	ssc:100038026|ssc:397106|	100038026|397106|	TNFSF13B, BAFF|IL10, CSIF, IL-10|	http://www.genome.jp/kegg-bin/show_pathway?ssc04672/ssc:100038026%09red/ssc:397106%09red
Endocytosis	KEGG PATHWAY	ssc04144	8	206	0.499603	0.972631	ENSSSCG00000030900|ENSSSCG00000024344|ENSSSCG00000028108|ENSSSCG00000020666|ENSSSCG00000001341|ENSSSCG00000022486|ENSSSCG00000026443|ENSSSCG00000001912	ssc:396801|ssc:414371|ssc:100626125|ssc:100738234|ssc:100135031|ssc:100621690|ssc:100624272|ssc:100157336|	396801|414371|100626125|100738234|100135031|100621690|100624272|100157336|	LDLR|CCR5|ASAP3|EHD4|SLA-2, SLA-B|CBLB|PIP5K1A|PML|	http://www.genome.jp/kegg-bin/show_pathway?ssc04144/ssc:396801%09red/ssc:100624272%09red/ssc:100157336%09red/ssc:100738234%09red/ssc:100135031%09red/ssc:414371%09red/ssc:100621690%09red/ssc:100626125%09red
Bacterial invasion of epithelial cells	KEGG PATHWAY	ssc05100	3	73	0.5141	0.983694	ENSSSCG00000021964|ENSSSCG00000003395|ENSSSCG00000022486	ssc:100514498|ssc:100518131|ssc:100621690|	100514498|100518131|100621690|	|PIK3CD|CBLB|	http://www.genome.jp/kegg-bin/show_pathway?ssc05100/ssc:100518131%09red/ssc:100621690%09red/ssc:100514498%09red
Cocaine addiction	KEGG PATHWAY	ssc05030	2	46	0.516036	0.983694	ENSSSCG00000030839|ENSSSCG00000016520	ssc:396913|ssc:100520468|	396913|100520468|	C-JUN, Jun|CREB3L2|	http://www.genome.jp/kegg-bin/show_pathway?ssc05030/ssc:100520468%09red/ssc:396913%09red
Transcriptional misregulation in cancer	KEGG PATHWAY	ssc05202	6	156	0.52327	0.9872	ENSSSCG00000005385|ENSSSCG00000017428|ENSSSCG00000006678|ENSSSCG00000011951|ENSSSCG00000001912|ENSSSCG00000017202	ssc:397479|ssc:397592|ssc:613130|ssc:100520981|ssc:100157336|ssc:396970|	397479|397592|613130|100520981|100157336|396970|	NOR-1, Nr4a3|JUP|FCGR1A|NFKBIZ|PML|H3F3A|	http://www.genome.jp/kegg-bin/show_pathway?ssc05202/ssc:100157336%09red/ssc:397592%09red/ssc:613130%09red/ssc:100520981%09red/ssc:396970%09red/ssc:397479%09red
Non-alcoholic fatty liver disease (NAFLD)	KEGG PATHWAY	ssc04932	6	160	0.547195	0.994829	ENSSSCG00000008090|ENSSSCG00000003395|ENSSSCG00000030839|ENSSSCG00000008088|ENSSSCG00000021964|ENSSSCG00000001404	ssc:397094|ssc:100518131|ssc:396913|ssc:397122|ssc:100514498|ssc:397086|	397094|100518131|396913|397122|100514498|397086|	IL1A, IL-1alpha|PIK3CD|C-JUN, Jun|IL1B| |TNF, TNFa|	http://www.genome.jp/kegg-bin/show_pathway?ssc04932/ssc:100518131%09red/ssc:397086%09red/ssc:396913%09red/ssc:397094%09red/ssc:100514498%09red/ssc:397122%09red
Steroid biosynthesis	KEGG PATHWAY	ssc00100	1	21	0.5513	0.994829	ENSSSCG00000028637	ssc:397055|	397055|	CYP27B1|	http://www.genome.jp/kegg-bin/show_pathway?ssc00100/ssc:397055%09red
Insulin signaling pathway	KEGG PATHWAY	ssc04910	5	133	0.55141	0.994829	ENSSSCG00000021964|ENSSSCG00000007665|ENSSSCG00000027855|ENSSSCG00000022486|ENSSSCG00000003395	ssc:100514498|ssc:100515824|ssc:100307052|ssc:100621690|ssc:100518131|	100514498|100515824|100307052|100621690|100518131|	| |SOCS1|CBLB|PIK3CD|	http://www.genome.jp/kegg-bin/show_pathway?ssc04910/ssc:100515824%09red/ssc:100518131%09red/ssc:100514498%09red/ssc:100307052%09red/ssc:100621690%09red
Lysine degradation	KEGG PATHWAY	ssc00310	2	50	0.559376	0.994829	ENSSSCG00000015820|ENSSSCG00000009806	ssc:100520868|ssc:100156137|	100520868|100156137|	WHSC1L1|SETD1B|	http://www.genome.jp/kegg-bin/show_pathway?ssc00310/ssc:100156137%09red/ssc:100520868%09red
Phosphatidylinositol signaling system	KEGG PATHWAY	ssc04070	3	79	0.565654	0.994829	ENSSSCG00000021964|ENSSSCG00000026443|ENSSSCG00000003395	ssc:100514498|ssc:100624272|ssc:100518131|	100514498|100624272|100518131|	|PIP5K1A|PIK3CD|	http://www.genome.jp/kegg-bin/show_pathway?ssc04070/ssc:100518131%09red/ssc:100514498%09red/ssc:100624272%09red
Fanconi anemia pathway	KEGG PATHWAY	ssc03460	2	51	0.569769	0.994829	ENSSSCG00000005304|ENSSSCG00000026362	ssc:100511060|ssc:100499567|	100511060|100499567|	FANCG|HES1|	http://www.genome.jp/kegg-bin/show_pathway?ssc03460/ssc:100499567%09red/ssc:100511060%09red
Ovarian steroidogenesis	KEGG PATHWAY	ssc04913	2	51	0.569769	0.994829	ENSSSCG00000030900|ENSSSCG00000030456	ssc:396801|ssc:100625479|	396801|100625479|	LDLR| |	http://www.genome.jp/kegg-bin/show_pathway?ssc04913/ssc:396801%09red/ssc:100625479%09red
Non-small cell lung cancer	KEGG PATHWAY	ssc05223	2	52	0.579983	0.994829	ENSSSCG00000021964|ENSSSCG00000003395	ssc:100514498|ssc:100518131|	100514498|100518131|	|PIK3CD|	http://www.genome.jp/kegg-bin/show_pathway?ssc05223/ssc:100518131%09red/ssc:100514498%09red
Maturity onset diabetes of the young	KEGG PATHWAY	ssc04950	1	23	0.582843	0.994829	ENSSSCG00000026362	ssc:100499567|	100499567|	HES1|	http://www.genome.jp/kegg-bin/show_pathway?ssc04950/ssc:100499567%09red
cGMP-PKG signaling pathway	KEGG PATHWAY	ssc04022	6	167	0.587707	0.994829	ENSSSCG00000003395|ENSSSCG00000009477|ENSSSCG00000006788|ENSSSCG00000021964|ENSSSCG00000016520|ENSSSCG00000007665	ssc:100518131|ssc:414911|ssc:606753|ssc:100514498|ssc:100520468|ssc:100515824|	100518131|414911|606753|100514498|100520468|100515824|	PIK3CD|EDNRB, ETB|ADORA3| |CREB3L2| |	http://www.genome.jp/kegg-bin/show_pathway?ssc04022/ssc:100520468%09red/ssc:100518131%09red/ssc:414911%09red/ssc:606753%09red/ssc:100514498%09red/ssc:100515824%09red
HTLV-I infection	KEGG PATHWAY	ssc05166	9	253	0.595844	0.994829	ENSSSCG00000003395|ENSSSCG00000030839|ENSSSCG00000014336|ENSSSCG00000001341|ENSSSCG00000021964|ENSSSCG00000002383|ENSSSCG00000017032|ENSSSCG00000027575|ENSSSCG00000001404	ssc:100518131|ssc:396913|ssc:100520726|ssc:100135031|ssc:100514498|ssc:100144486|ssc:397015|ssc:100622609|ssc:397086|	100518131|396913|100520726|100135031|100514498|100144486|397015|100622609|397086|	PIK3CD|C-JUN, Jun|EGR1|SLA-2, SLA-B| |FOS, c-fos|PTTG1, PTTG|RELB|TNF, TNFa|	http://www.genome.jp/kegg-bin/show_pathway?ssc05166/ssc:100518131%09red/ssc:396913%09red/ssc:100135031%09red/ssc:397086%09red/ssc:100514498%09red/ssc:397015%09red/ssc:100520726%09red/ssc:100144486%09red/ssc:100622609%09red
Retinol metabolism	KEGG PATHWAY	ssc00830	2	54	0.599873	0.994829	ENSSSCG00000021395|ENSSSCG00000026798	ssc:100126281|ssc:403111|	100126281|403111|	CYP3A46, CYP3A88|CYP2C42|	http://www.genome.jp/kegg-bin/show_pathway?ssc00830/ssc:100126281%09red/ssc:403111%09red
Adrenergic signaling in cardiomyocytes	KEGG PATHWAY	ssc04261	5	141	0.601632	0.994829	ENSSSCG00000004895|ENSSSCG00000021964|ENSSSCG00000003395|ENSSSCG00000009123|ENSSSCG00000016520	ssc:100738877|ssc:100514498|ssc:100518131|ssc:397674|ssc:100520468|	100738877|100514498|100518131|397674|100520468|	| |PIK3CD|CAMK2D|CREB3L2|	http://www.genome.jp/kegg-bin/show_pathway?ssc04261/ssc:100520468%09red/ssc:397674%09red/ssc:100514498%09red/ssc:100738877%09red/ssc:100518131%09red
Nicotinate and nicotinamide metabolism	KEGG PATHWAY	ssc00760	1	25	0.612171	0.994829	ENSSSCG00000022912	ssc:100623678|	100623678|	NT5C3A|	http://www.genome.jp/kegg-bin/show_pathway?ssc00760/ssc:100623678%09red
Lysosome	KEGG PATHWAY	ssc04142	4	115	0.619429	0.994829	ENSSSCG00000025932|ENSSSCG00000012890|ENSSSCG00000014627|ENSSSCG00000004044	ssc:100627432|ssc:100521769|ssc:100518980|ssc:397214|	100627432|100521769|100518980|397214|	|TCIRG1|SMPD1|IGF2R, M6P/IGF2R|	http://www.genome.jp/kegg-bin/show_pathway?ssc04142/ssc:100518980%09red/ssc:100521769%09red/ssc:397214%09red/ssc:100627432%09red
Collecting duct acid secretion	KEGG PATHWAY	ssc04966	1	26	0.626053	0.994829	ENSSSCG00000012890	ssc:100521769|	100521769|	TCIRG1|	http://www.genome.jp/kegg-bin/show_pathway?ssc04966/ssc:100521769%09red
Thyroid cancer	KEGG PATHWAY	ssc05216	1	26	0.626053	0.994829	ENSSSCG00000030680	ssc:100170126|	100170126|	LEF1|	http://www.genome.jp/kegg-bin/show_pathway?ssc05216/ssc:100170126%09red
Inositol phosphate metabolism	KEGG PATHWAY	ssc00562	2	57	0.628362	0.994829	ENSSSCG00000026443|ENSSSCG00000003395	ssc:100624272|ssc:100518131|	100624272|100518131|	PIP5K1A|PIK3CD|	http://www.genome.jp/kegg-bin/show_pathway?ssc00562/ssc:100518131%09red/ssc:100624272%09red
Small cell lung cancer	KEGG PATHWAY	ssc05222	3	88	0.636365	0.994829	ENSSSCG00000004895|ENSSSCG00000021964|ENSSSCG00000003395	ssc:100738877|ssc:100514498|ssc:100518131|	100738877|100514498|100518131|	| |PIK3CD|	http://www.genome.jp/kegg-bin/show_pathway?ssc05222/ssc:100518131%09red/ssc:100514498%09red/ssc:100738877%09red
Axon guidance	KEGG PATHWAY	ssc04360	4	119	0.64527	0.994829	ENSSSCG00000015645|ENSSSCG00000011346|ENSSSCG00000006495|ENSSSCG00000026412	ssc:100518625|ssc:100522643|ssc:100157147|ssc:100620331|	100518625|100522643|100157147|100620331|	SRGAP2|PLXNB1|SEMA4A|PLXNA3|	http://www.genome.jp/kegg-bin/show_pathway?ssc04360/ssc:100620331%09red/ssc:100522643%09red/ssc:100518625%09red/ssc:100157147%09red
Synaptic vesicle cycle	KEGG PATHWAY	ssc04721	2	59	0.646462	0.994829	ENSSSCG00000012890|ENSSSCG00000005617	ssc:100521769|ssc:100517927|	100521769|100517927|	TCIRG1|STXBP1|	http://www.genome.jp/kegg-bin/show_pathway?ssc04721/ssc:100521769%09red/ssc:100517927%09red
Rap1 signaling pathway	KEGG PATHWAY	ssc04015	7	208	0.652042	0.994829	ENSSSCG00000003395|ENSSSCG00000002332|ENSSSCG00000021964|ENSSSCG00000026832|ENSSSCG00000001695|ENSSSCG00000003140|ENSSSCG00000005738	ssc:100518131|ssc:100157762|ssc:100514498|ssc:100513084|ssc:397157|ssc:100302504|ssc:100513970|	100518131|100157762|100514498|100513084|397157|100302504|100513970|	PIK3CD|SIPA1L1| |CSF1, MCSFBETA|VEGFA, VEGF|FGF21|RALGDS|	http://www.genome.jp/kegg-bin/show_pathway?ssc04015/ssc:100518131%09red/ssc:100513084%09red/ssc:397157%09red/ssc:100513970%09red/ssc:100514498%09red/ssc:100157762%09red/ssc:100302504%09red
Mucin type O-Glycan biosynthesis	KEGG PATHWAY	ssc00512	1	28	0.652347	0.994829	ENSSSCG00000005943	ssc:445537|	445537|	ST3GAL1, SIAT4A|	http://www.genome.jp/kegg-bin/show_pathway?ssc00512/ssc:445537%09red
PI3K-Akt signaling pathway	KEGG PATHWAY	ssc04151	11	328	0.67089	1	ENSSSCG00000003395|ENSSSCG00000016520|ENSSSCG00000004895|ENSSSCG00000016832|ENSSSCG00000021964|ENSSSCG00000026832|ENSSSCG00000001695|ENSSSCG00000021504|ENSSSCG00000009997|ENSSSCG00000003140|ENSSSCG00000005163	ssc:100518131|ssc:100520468|ssc:100738877|ssc:100271930|ssc:100514498|ssc:100513084|ssc:397157|ssc:100310806|ssc:100152038|ssc:100302504|ssc:445459|	100518131|100520468|100738877|100271930|100514498|100513084|397157|100310806|100152038|100302504|445459|	PIK3CD|CREB3L2| |IL7R, CD127| |CSF1, MCSFBETA|VEGFA, VEGF|IFN-ALPHAOMEGA|OSM|FGF21|IFNB1, IFN-beta, IFNb|	http://www.genome.jp/kegg-bin/show_pathway?ssc04151/ssc:100520468%09red/ssc:100518131%09red/ssc:100513084%09red/ssc:397157%09red/ssc:100271930%09red/ssc:100152038%09red/ssc:100302504%09red/ssc:100310806%09red/ssc:100514498%09red/ssc:100738877%09red/ssc:445459%09red
Circadian entrainment	KEGG PATHWAY	ssc04713	3	98	0.705019	1	ENSSSCG00000017983|ENSSSCG00000002383|ENSSSCG00000009123	ssc:100620648|ssc:100144486|ssc:397674|	100620648|100144486|397674|	PER1|FOS, c-fos|CAMK2D|	http://www.genome.jp/kegg-bin/show_pathway?ssc04713/ssc:397674%09red/ssc:100144486%09red/ssc:100620648%09red
Arrhythmogenic right ventricular cardiomyopathy (ARVC)	KEGG PATHWAY	ssc05412	2	67	0.711914	1	ENSSSCG00000017428|ENSSSCG00000030680	ssc:397592|ssc:100170126|	397592|100170126|	JUP|LEF1|	http://www.genome.jp/kegg-bin/show_pathway?ssc05412/ssc:397592%09red/ssc:100170126%09red
Oxytocin signaling pathway	KEGG PATHWAY	ssc04921	5	161	0.711954	1	ENSSSCG00000021964|ENSSSCG00000003395|ENSSSCG00000002383|ENSSSCG00000009123|ENSSSCG00000030839	ssc:100514498|ssc:100518131|ssc:100144486|ssc:397674|ssc:396913|	100514498|100518131|100144486|397674|396913|	|PIK3CD|FOS, c-fos|CAMK2D|C-JUN, Jun|	http://www.genome.jp/kegg-bin/show_pathway?ssc04921/ssc:100518131%09red/ssc:397674%09red/ssc:100514498%09red/ssc:396913%09red/ssc:100144486%09red
Proteoglycans in cancer	KEGG PATHWAY	ssc05205	6	192	0.715157	1	ENSSSCG00000003395|ENSSSCG00000009123|ENSSSCG00000021964|ENSSSCG00000022486|ENSSSCG00000001695|ENSSSCG00000001404	ssc:100518131|ssc:397674|ssc:100514498|ssc:100621690|ssc:397157|ssc:397086|	100518131|397674|100514498|100621690|397157|397086|	PIK3CD|CAMK2D| |CBLB|VEGFA, VEGF|TNF, TNFa|	http://www.genome.jp/kegg-bin/show_pathway?ssc05205/ssc:100518131%09red/ssc:397157%09red/ssc:100621690%09red/ssc:397086%09red/ssc:100514498%09red/ssc:397674%09red
Bladder cancer	KEGG PATHWAY	ssc05219	1	35	0.730658	1	ENSSSCG00000001695	ssc:397157|	397157|	VEGFA, VEGF|	http://www.genome.jp/kegg-bin/show_pathway?ssc05219/ssc:397157%09red
SNARE interactions in vesicular transport	KEGG PATHWAY	ssc04130	1	36	0.740303	1	ENSSSCG00000004125	ssc:100152253|	100152253|	STX11|	http://www.genome.jp/kegg-bin/show_pathway?ssc04130/ssc:100152253%09red
cAMP signaling pathway	KEGG PATHWAY	ssc04024	6	201	0.753723	1	ENSSSCG00000003395|ENSSSCG00000009123|ENSSSCG00000021964|ENSSSCG00000002383|ENSSSCG00000016520|ENSSSCG00000030839	ssc:100518131|ssc:397674|ssc:100514498|ssc:100144486|ssc:100520468|ssc:396913|	100518131|397674|100514498|100144486|100520468|396913|	PIK3CD|CAMK2D| |FOS, c-fos|CREB3L2|C-JUN, Jun|	http://www.genome.jp/kegg-bin/show_pathway?ssc04024/ssc:100520468%09red/ssc:100518131%09red/ssc:396913%09red/ssc:100514498%09red/ssc:100144486%09red/ssc:397674%09red
p53 signaling pathway	KEGG PATHWAY	ssc04115	2	73	0.754079	1	ENSSSCG00000011357|ENSSSCG00000026454	ssc:100154430|ssc:397278|	100154430|397278|	|PMAIP1, TN3|	http://www.genome.jp/kegg-bin/show_pathway?ssc04115/ssc:100154430%09red/ssc:397278%09red
Regulation of autophagy	KEGG PATHWAY	ssc04140	1	38	0.758571	1	ENSSSCG00000021504	ssc:100310806|	100310806|	IFN-ALPHAOMEGA|	http://www.genome.jp/kegg-bin/show_pathway?ssc04140/ssc:100310806%09red
TGF-beta signaling pathway	KEGG PATHWAY	ssc04350	2	74	0.760565	1	ENSSSCG00000001404|ENSSSCG00000021865	ssc:397086|ssc:397093|	397086|397093|	TNF, TNFa|INHBA|	http://www.genome.jp/kegg-bin/show_pathway?ssc04350/ssc:397093%09red/ssc:397086%09red
Fatty acid degradation	KEGG PATHWAY	ssc00071	1	41	0.783594	1	ENSSSCG00000012880	ssc:399527|	399527|	CPT1A, CPT1, L-CPTI|	http://www.genome.jp/kegg-bin/show_pathway?ssc00071/ssc:399527%09red
Thyroid hormone signaling pathway	KEGG PATHWAY	ssc04919	3	113	0.788746	1	ENSSSCG00000021964|ENSSSCG00000003395|ENSSSCG00000016057	ssc:100514498|ssc:100518131|ssc:396655|	100514498|100518131|396655|	|PIK3CD|STAT1|	http://www.genome.jp/kegg-bin/show_pathway?ssc04919/ssc:100518131%09red/ssc:396655%09red/ssc:100514498%09red
Sphingolipid metabolism	KEGG PATHWAY	ssc00600	1	45	0.812975	1	ENSSSCG00000014627	ssc:100518980|	100518980|	SMPD1|	http://www.genome.jp/kegg-bin/show_pathway?ssc00600/ssc:100518980%09red
Fatty acid metabolism	KEGG PATHWAY	ssc01212	1	45	0.812975	1	ENSSSCG00000012880	ssc:399527|	399527|	CPT1A, CPT1, L-CPTI|	http://www.genome.jp/kegg-bin/show_pathway?ssc01212/ssc:399527%09red
Dopaminergic synapse	KEGG PATHWAY	ssc04728	3	120	0.820512	1	ENSSSCG00000002383|ENSSSCG00000009123|ENSSSCG00000016520	ssc:100144486|ssc:397674|ssc:100520468|	100144486|397674|100520468|	FOS, c-fos|CAMK2D|CREB3L2|	http://www.genome.jp/kegg-bin/show_pathway?ssc04728/ssc:100520468%09red/ssc:397674%09red/ssc:100144486%09red
Progesterone-mediated oocyte maturation	KEGG PATHWAY	ssc04914	2	85	0.822615	1	ENSSSCG00000021964|ENSSSCG00000003395	ssc:100514498|ssc:100518131|	100514498|100518131|	|PIK3CD|	http://www.genome.jp/kegg-bin/show_pathway?ssc04914/ssc:100518131%09red/ssc:100514498%09red
Insulin secretion	KEGG PATHWAY	ssc04911	2	86	0.827473	1	ENSSSCG00000009123|ENSSSCG00000016520	ssc:397674|ssc:100520468|	397674|100520468|	CAMK2D|CREB3L2|	http://www.genome.jp/kegg-bin/show_pathway?ssc04911/ssc:100520468%09red/ssc:397674%09red
GnRH signaling pathway	KEGG PATHWAY	ssc04912	2	86	0.827473	1	ENSSSCG00000009123|ENSSSCG00000030839	ssc:397674|ssc:396913|	397674|396913|	CAMK2D|C-JUN, Jun|	http://www.genome.jp/kegg-bin/show_pathway?ssc04912/ssc:397674%09red/ssc:396913%09red
Ras signaling pathway	KEGG PATHWAY	ssc04014	6	223	0.831617	1	ENSSSCG00000003395|ENSSSCG00000021964|ENSSSCG00000026832|ENSSSCG00000001695|ENSSSCG00000003140|ENSSSCG00000005738	ssc:100518131|ssc:100514498|ssc:100513084|ssc:397157|ssc:100302504|ssc:100513970|	100518131|100514498|100513084|397157|100302504|100513970|	PIK3CD| |CSF1, MCSFBETA|VEGFA, VEGF|FGF21|RALGDS|	http://www.genome.jp/kegg-bin/show_pathway?ssc04014/ssc:100518131%09red/ssc:100513084%09red/ssc:397157%09red/ssc:100513970%09red/ssc:100514498%09red/ssc:100302504%09red
Metabolism of xenobiotics by cytochrome P450	KEGG PATHWAY	ssc00980	1	49	0.838371	1	ENSSSCG00000030456	ssc:100625479|	100625479|	|	http://www.genome.jp/kegg-bin/show_pathway?ssc00980/ssc:100625479%09red
Amino sugar and nucleotide sugar metabolism	KEGG PATHWAY	ssc00520	1	49	0.838371	1	ENSSSCG00000008316	ssc:100523729|	100523729|	NAGK|	http://www.genome.jp/kegg-bin/show_pathway?ssc00520/ssc:100523729%09red
Focal adhesion	KEGG PATHWAY	ssc04510	5	194	0.843293	1	ENSSSCG00000004895|ENSSSCG00000021964|ENSSSCG00000003395|ENSSSCG00000001695|ENSSSCG00000030839	ssc:100738877|ssc:100514498|ssc:100518131|ssc:397157|ssc:396913|	100738877|100514498|100518131|397157|396913|	| |PIK3CD|VEGFA, VEGF|C-JUN, Jun|	http://www.genome.jp/kegg-bin/show_pathway?ssc04510/ssc:100518131%09red/ssc:100514498%09red/ssc:100738877%09red/ssc:396913%09red/ssc:397157%09red
Wnt signaling pathway	KEGG PATHWAY	ssc04310	3	128	0.851743	1	ENSSSCG00000030839|ENSSSCG00000009123|ENSSSCG00000030680	ssc:396913|ssc:397674|ssc:100170126|	396913|397674|100170126|	C-JUN, Jun|CAMK2D|LEF1|	http://www.genome.jp/kegg-bin/show_pathway?ssc04310/ssc:397674%09red/ssc:396913%09red/ssc:100170126%09red
Basal cell carcinoma	KEGG PATHWAY	ssc05217	1	52	0.855131	1	ENSSSCG00000030680	ssc:100170126|	100170126|	LEF1|	http://www.genome.jp/kegg-bin/show_pathway?ssc05217/ssc:100170126%09red
Signaling pathways regulating pluripotency of stem cells	KEGG PATHWAY	ssc04550	3	132	0.865504	1	ENSSSCG00000021964|ENSSSCG00000003395|ENSSSCG00000021865	ssc:100514498|ssc:100518131|ssc:397093|	100514498|100518131|397093|	|PIK3CD|INHBA|	http://www.genome.jp/kegg-bin/show_pathway?ssc04550/ssc:100518131%09red/ssc:100514498%09red/ssc:397093%09red
Alzheimer's disease	KEGG PATHWAY	ssc05010	4	175	0.886466	1	ENSSSCG00000001404|ENSSSCG00000008088|ENSSSCG00000000423|ENSSSCG00000023150	ssc:397086|ssc:397122|ssc:100627964|ssc:100514839|	397086|397122|100627964|100514839|	TNF, TNFa|IL1B|LRP1| |	http://www.genome.jp/kegg-bin/show_pathway?ssc05010/ssc:397122%09red/ssc:397086%09red/ssc:100514839%09red/ssc:100627964%09red
Arachidonic acid metabolism	KEGG PATHWAY	ssc00590	1	62	0.899433	1	ENSSSCG00000026798	ssc:403111|	403111|	CYP2C42|	http://www.genome.jp/kegg-bin/show_pathway?ssc00590/ssc:403111%09red
Viral myocarditis	KEGG PATHWAY	ssc05416	1	63	0.903038	1	ENSSSCG00000001341	ssc:100135031|	100135031|	SLA-2, SLA-B|	http://www.genome.jp/kegg-bin/show_pathway?ssc05416/ssc:100135031%09red
Oocyte meiosis	KEGG PATHWAY	ssc04114	2	107	0.905239	1	ENSSSCG00000017032|ENSSSCG00000009123	ssc:397015|ssc:397674|	397015|397674|	PTTG1, PTTG|CAMK2D|	http://www.genome.jp/kegg-bin/show_pathway?ssc04114/ssc:397674%09red/ssc:397015%09red
Purine metabolism	KEGG PATHWAY	ssc00230	4	183	0.905352	1	ENSSSCG00000022912|ENSSSCG00000008399|ENSSSCG00000022880|ENSSSCG00000025233	ssc:100623678|ssc:100642182|ssc:100642182|ssc:100642182|	100623678|100642182|100642182|100642182|	NT5C3A|PNPT1|PNPT1|PNPT1|	http://www.genome.jp/kegg-bin/show_pathway?ssc00230/ssc:100642182%09red/ssc:100623678%09red
PPAR signaling pathway	KEGG PATHWAY	ssc03320	1	68	0.919218	1	ENSSSCG00000012880	ssc:399527|	399527|	CPT1A, CPT1, L-CPTI|	http://www.genome.jp/kegg-bin/show_pathway?ssc03320/ssc:399527%09red
Long-term potentiation	KEGG PATHWAY	ssc04720	1	68	0.919218	1	ENSSSCG00000009123	ssc:397674|	397674|	CAMK2D|	http://www.genome.jp/kegg-bin/show_pathway?ssc04720/ssc:397674%09red
Bile secretion	KEGG PATHWAY	ssc04976	1	69	0.922115	1	ENSSSCG00000030900	ssc:396801|	396801|	LDLR|	http://www.genome.jp/kegg-bin/show_pathway?ssc04976/ssc:396801%09red
MicroRNAs in cancer	KEGG PATHWAY	ssc05206	5	228	0.922582	1	ENSSSCG00000004895|ENSSSCG00000015246|ENSSSCG00000027855|ENSSSCG00000030456|ENSSSCG00000001695	ssc:100738877|ssc:100517843|ssc:100307052|ssc:100625479|ssc:397157|	100738877|100517843|100307052|100625479|397157|	|ST14|SOCS1| |VEGFA, VEGF|	http://www.genome.jp/kegg-bin/show_pathway?ssc05206/ssc:100625479%09red/ssc:100738877%09red/ssc:100307052%09red/ssc:100517843%09red/ssc:397157%09red
Adherens junction	KEGG PATHWAY	ssc04520	1	71	0.927601	1	ENSSSCG00000030680	ssc:100170126|	100170126|	LEF1|	http://www.genome.jp/kegg-bin/show_pathway?ssc04520/ssc:100170126%09red
Thyroid hormone synthesis	KEGG PATHWAY	ssc04918	1	72	0.930198	1	ENSSSCG00000016520	ssc:100520468|	100520468|	CREB3L2|	http://www.genome.jp/kegg-bin/show_pathway?ssc04918/ssc:100520468%09red
Regulation of actin cytoskeleton	KEGG PATHWAY	ssc04810	4	198	0.933397	1	ENSSSCG00000021964|ENSSSCG00000026443|ENSSSCG00000003395|ENSSSCG00000003140	ssc:100514498|ssc:100624272|ssc:100518131|ssc:100302504|	100514498|100624272|100518131|100302504|	|PIP5K1A|PIK3CD|FGF21|	http://www.genome.jp/kegg-bin/show_pathway?ssc04810/ssc:100518131%09red/ssc:100514498%09red/ssc:100624272%09red/ssc:100302504%09red
Leukocyte transendothelial migration	KEGG PATHWAY	ssc04670	2	119	0.933489	1	ENSSSCG00000021964|ENSSSCG00000003395	ssc:100514498|ssc:100518131|	100514498|100518131|	|PIK3CD|	http://www.genome.jp/kegg-bin/show_pathway?ssc04670/ssc:100518131%09red/ssc:100514498%09red
Gastric acid secretion	KEGG PATHWAY	ssc04971	1	74	0.935115	1	ENSSSCG00000009123	ssc:397674|	397674|	CAMK2D|	http://www.genome.jp/kegg-bin/show_pathway?ssc04971/ssc:397674%09red
Hypertrophic cardiomyopathy (HCM)	KEGG PATHWAY	ssc05410	1	78	0.943936	1	ENSSSCG00000001404	ssc:397086|	397086|	TNF, TNFa|	http://www.genome.jp/kegg-bin/show_pathway?ssc05410/ssc:397086%09red
Peroxisome	KEGG PATHWAY	ssc04146	1	80	0.947886	1	ENSSSCG00000002362	ssc:100152503|	100152503|	|	http://www.genome.jp/kegg-bin/show_pathway?ssc04146/ssc:100152503%09red
ECM-receptor interaction	KEGG PATHWAY	ssc04512	1	82	0.951559	1	ENSSSCG00000022204	ssc:100623869|	100623869|	AGRN|	http://www.genome.jp/kegg-bin/show_pathway?ssc04512/ssc:100623869%09red
Dilated cardiomyopathy	KEGG PATHWAY	ssc05414	1	84	0.954973	1	ENSSSCG00000001404	ssc:397086|	397086|	TNF, TNFa|	http://www.genome.jp/kegg-bin/show_pathway?ssc05414/ssc:397086%09red
Platelet activation	KEGG PATHWAY	ssc04611	2	132	0.955021	1	ENSSSCG00000021964|ENSSSCG00000003395	ssc:100514498|ssc:100518131|	100514498|100518131|	|PIK3CD|	http://www.genome.jp/kegg-bin/show_pathway?ssc04611/ssc:100518131%09red/ssc:100514498%09red
GABAergic synapse	KEGG PATHWAY	ssc04727	1	85	0.956588	1	ENSSSCG00000000807	ssc:100154364|	100154364|	SLC38A1|	http://www.genome.jp/kegg-bin/show_pathway?ssc04727/ssc:100154364%09red
Oxidative phosphorylation	KEGG PATHWAY	ssc00190	2	134	0.957674	1	ENSSSCG00000012890|ENSSSCG00000010261	ssc:100521769|ssc:100155201|	100521769|100155201|	TCIRG1|PPA1|	http://www.genome.jp/kegg-bin/show_pathway?ssc00190/ssc:100521769%09red/ssc:100155201%09red
Hippo signaling pathway	KEGG PATHWAY	ssc04390	2	138	0.962539	1	ENSSSCG00000012591|ENSSSCG00000030680	ssc:100158213|ssc:100170126|	100158213|100170126|	AMOT|LEF1|	http://www.genome.jp/kegg-bin/show_pathway?ssc04390/ssc:100170126%09red/ssc:100158213%09red
Calcium signaling pathway	KEGG PATHWAY	ssc04020	3	182	0.963383	1	ENSSSCG00000023912|ENSSSCG00000009477|ENSSSCG00000009123	ssc:100521440|ssc:414911|ssc:397674|	100521440|414911|397674|	|EDNRB, ETB|CAMK2D|	http://www.genome.jp/kegg-bin/show_pathway?ssc04020/ssc:414911%09red/ssc:100521440%09red/ssc:397674%09red
Gap junction	KEGG PATHWAY	ssc04540	1	90	0.963839	1	ENSSSCG00000000773	ssc:100518253|	100518253|	TUBA8|	http://www.genome.jp/kegg-bin/show_pathway?ssc04540/ssc:100518253%09red
Alcoholism	KEGG PATHWAY	ssc05034	2	143	0.967868	1	ENSSSCG00000017202|ENSSSCG00000016520	ssc:396970|ssc:100520468|	396970|100520468|	H3F3A|CREB3L2|	http://www.genome.jp/kegg-bin/show_pathway?ssc05034/ssc:100520468%09red/ssc:396970%09red
Ribosome	KEGG PATHWAY	ssc03010	2	143	0.967868	1	ENSSSCG00000024398|ENSSSCG00000008882	ssc:780432|ssc:100620094|	780432|100620094|	RPL13A|RPL15|	http://www.genome.jp/kegg-bin/show_pathway?ssc03010/ssc:100620094%09red/ssc:780432%09red
Cell adhesion molecules (CAMs)	KEGG PATHWAY	ssc04514	2	146	0.970706	1	ENSSSCG00000005211|ENSSSCG00000001341	ssc:574058|ssc:100135031|	574058|100135031|	CD274, PDL1|SLA-2, SLA-B|	http://www.genome.jp/kegg-bin/show_pathway?ssc04514/ssc:100135031%09red/ssc:574058%09red
Parkinson's disease	KEGG PATHWAY	ssc05012	2	151	0.974908	1	ENSSSCG00000023379|ENSSSCG00000011393	ssc:100514753|ssc:100512631|	100514753|100512631|	UBE2L6|UBA7|	http://www.genome.jp/kegg-bin/show_pathway?ssc05012/ssc:100512631%09red/ssc:100514753%09red
Protein processing in endoplasmic reticulum	KEGG PATHWAY	ssc04141	2	162	0.982202	1	ENSSSCG00000004895|ENSSSCG00000025181	ssc:100738877|ssc:100523731|	100738877|100523731|	| |	http://www.genome.jp/kegg-bin/show_pathway?ssc04141/ssc:100523731%09red/ssc:100738877%09red
Serotonergic synapse	KEGG PATHWAY	ssc04726	1	112	0.983825	1	ENSSSCG00000026798	ssc:403111|	403111|	CYP2C42|	http://www.genome.jp/kegg-bin/show_pathway?ssc04726/ssc:403111%09red
Cell cycle	KEGG PATHWAY	ssc04110	1	115	0.985507	1	ENSSSCG00000017032	ssc:397015|	397015|	PTTG1, PTTG|	http://www.genome.jp/kegg-bin/show_pathway?ssc04110/ssc:397015%09red
Glutamatergic synapse	KEGG PATHWAY	ssc04724	1	123	0.989185	1	ENSSSCG00000000807	ssc:100154364|	100154364|	SLC38A1|	http://www.genome.jp/kegg-bin/show_pathway?ssc04724/ssc:100154364%09red
Huntington's disease	KEGG PATHWAY	ssc05016	2	190	0.992686	1	ENSSSCG00000023522|ENSSSCG00000016520	ssc:100154530|ssc:100520468|	100154530|100520468|	|CREB3L2|	http://www.genome.jp/kegg-bin/show_pathway?ssc05016/ssc:100520468%09red/ssc:100154530%09red
RNA transport	KEGG PATHWAY	ssc03013	1	149	0.995827	1	ENSSSCG00000024498	ssc:100627643|	100627643|	|	http://www.genome.jp/kegg-bin/show_pathway?ssc03013/ssc:100627643%09red
Neuroactive ligand-receptor interaction	KEGG PATHWAY	ssc04080	3	268	0.996935	1	ENSSSCG00000023868|ENSSSCG00000009477|ENSSSCG00000006788	ssc:100625728|ssc:414911|ssc:606753|	100625728|414911|606753|	C3AR1|EDNRB, ETB|ADORA3|	http://www.genome.jp/kegg-bin/show_pathway?ssc04080/ssc:606753%09red/ssc:100625728%09red/ssc:414911%09red
Metabolic pathways	KEGG PATHWAY	ssc01100	11	1166	1	1	ENSSSCG00000005943|ENSSSCG00000021395|ENSSSCG00000022912|ENSSSCG00000005626|ENSSSCG00000028637|ENSSSCG00000014627|ENSSSCG00000007007|ENSSSCG00000026443|ENSSSCG00000012890|ENSSSCG00000026798|ENSSSCG00000008647	ssc:445537|ssc:100126281|ssc:100623678|ssc:100736908|ssc:397055|ssc:100518980|ssc:100519877|ssc:100624272|ssc:100521769|ssc:403111|ssc:100623872|	445537|100126281|100623678|100736908|397055|100518980|100519877|100624272|100521769|403111|100623872|	ST3GAL1, SIAT4A|CYP3A46, CYP3A88|NT5C3A|FPGS|CYP27B1|SMPD1|IDO1, IDO|PIP5K1A|TCIRG1|CYP2C42|CMPK2|	http://www.genome.jp/kegg-bin/show_pathway?ssc01100/ssc:100521769%09red/ssc:100624272%09red/ssc:100623872%09red/ssc:397055%09red/ssc:100623678%09red/ssc:100736908%09red/ssc:445537%09red/ssc:100518980%09red/ssc:100126281%09red/ssc:100519877%09red/ssc:403111%09red
Olfactory transduction	KEGG PATHWAY	ssc04740	2	810	1	1	ENSSSCG00000014745|ENSSSCG00000009123	ssc:100624701|ssc:397674|	100624701|397674|	|CAMK2D|	http://www.genome.jp/kegg-bin/show_pathway?ssc04740/ssc:397674%09red/ssc:100624701%09red
--------------------
#Term	Database	ID	Input number	Background number	P-Value	Corrected P-Value	Input	KO	Entrez_ID	KO_name	Hyperlink
--------------------
#Term	Database	ID	Input number	Background number	P-Value	Corrected P-Value	Input	KO	Entrez_ID	KO_name	Hyperlink
--------------------

## Sheet: GSWW DOWN
##Databases: KEGG PATHWAY
##Statistical test method: hypergeometric test / Fisher's exact test
##FDR correction method: Benjamini and Hochberg
#Term	Database	ID	Input number	Background number	P-Value	Corrected P-Value	Input	KO	Entrez_ID	KO_name	Hyperlink
Dorso-ventral axis formation	KEGG PATHWAY	ssc04320	2	23	0.013064	0.705002	ENSSSCG00000014959|ENSSSCG00000010081	ssc:100517358|ssc:100153927|	100517358|100153927|	PIWIL4|MAPK1, ERK2|	http://www.genome.jp/kegg-bin/show_pathway?ssc04320/ssc:100153927%09red/ssc:100517358%09red
Bladder cancer	KEGG PATHWAY	ssc05219	2	35	0.0274668	0.705002	ENSSSCG00000010081|ENSSSCG00000027291	ssc:100153927|ssc:396880|	100153927|396880|	MAPK1, ERK2|IL8, AMCF-I, CXCL8|	http://www.genome.jp/kegg-bin/show_pathway?ssc05219/ssc:100153927%09red/ssc:396880%09red
Starch and sucrose metabolism	KEGG PATHWAY	ssc00500	2	49	0.0493736	0.705002	ENSSSCG00000012000|ENSSSCG00000014838	ssc:100156209|ssc:100515088|	100156209|100515088|	GBE1|PGM2L1|	http://www.genome.jp/kegg-bin/show_pathway?ssc00500/ssc:100156209%09red/ssc:100515088%09red
NOD-like receptor signaling pathway	KEGG PATHWAY	ssc04621	2	50	0.0511191	0.705002	ENSSSCG00000010081|ENSSSCG00000027291	ssc:100153927|ssc:396880|	100153927|396880|	MAPK1, ERK2|IL8, AMCF-I, CXCL8|	http://www.genome.jp/kegg-bin/show_pathway?ssc04621/ssc:100153927%09red/ssc:396880%09red
Pertussis	KEGG PATHWAY	ssc05133	2	73	0.0965801	0.705002	ENSSSCG00000010081|ENSSSCG00000027291	ssc:100153927|ssc:396880|	100153927|396880|	MAPK1, ERK2|IL8, AMCF-I, CXCL8|	http://www.genome.jp/kegg-bin/show_pathway?ssc05133/ssc:100153927%09red/ssc:396880%09red
Salmonella infection	KEGG PATHWAY	ssc05132	2	81	0.114336	0.705002	ENSSSCG00000010081|ENSSSCG00000027291	ssc:100153927|ssc:396880|	100153927|396880|	MAPK1, ERK2|IL8, AMCF-I, CXCL8|	http://www.genome.jp/kegg-bin/show_pathway?ssc05132/ssc:100153927%09red/ssc:396880%09red
Sulfur metabolism	KEGG PATHWAY	ssc00920	1	17	0.11845	0.705002	ENSSSCG00000000376	ssc:100625272|	100625272|	SUOX|	http://www.genome.jp/kegg-bin/show_pathway?ssc00920/ssc:100625272%09red
Rheumatoid arthritis	KEGG PATHWAY	ssc05323	2	87	0.128155	0.705002	ENSSSCG00000027291|ENSSSCG00000026872	ssc:396880|ssc:100127162|	396880|100127162|	IL8, AMCF-I, CXCL8|APRIL|	http://www.genome.jp/kegg-bin/show_pathway?ssc05323/ssc:396880%09red/ssc:100127162%09red
Fatty acid elongation	KEGG PATHWAY	ssc00062	1	20	0.136788	0.705002	ENSSSCG00000004510	ssc:100312959|	100312959|	ACAA2|	http://www.genome.jp/kegg-bin/show_pathway?ssc00062/ssc:100312959%09red
Toll-like receptor signaling pathway	KEGG PATHWAY	ssc04620	2	101	0.161735	0.705002	ENSSSCG00000010081|ENSSSCG00000027291	ssc:100153927|ssc:396880|	100153927|396880|	MAPK1, ERK2|IL8, AMCF-I, CXCL8|	http://www.genome.jp/kegg-bin/show_pathway?ssc04620/ssc:100153927%09red/ssc:396880%09red
Propanoate metabolism	KEGG PATHWAY	ssc00640	1	26	0.172335	0.705002	ENSSSCG00000004216	ssc:100512509|	100512509|	ECHDC1|	http://www.genome.jp/kegg-bin/show_pathway?ssc00640/ssc:100512509%09red
Glycosylphosphatidylinositol(GPI)-anchor biosynthesis	KEGG PATHWAY	ssc00563	1	26	0.172335	0.705002	ENSSSCG00000012061	ssc:100154885|	100154885|	PIGP|	http://www.genome.jp/kegg-bin/show_pathway?ssc00563/ssc:100154885%09red
Thyroid cancer	KEGG PATHWAY	ssc05216	1	26	0.172335	0.705002	ENSSSCG00000010081	ssc:100153927|	100153927|	MAPK1, ERK2|	http://www.genome.jp/kegg-bin/show_pathway?ssc05216/ssc:100153927%09red
Chagas disease (American trypanosomiasis)	KEGG PATHWAY	ssc05142	2	108	0.17907	0.705002	ENSSSCG00000010081|ENSSSCG00000027291	ssc:100153927|ssc:396880|	100153927|396880|	MAPK1, ERK2|IL8, AMCF-I, CXCL8|	http://www.genome.jp/kegg-bin/show_pathway?ssc05142/ssc:100153927%09red/ssc:396880%09red
beta-Alanine metabolism	KEGG PATHWAY	ssc00410	1	28	0.183858	0.705002	ENSSSCG00000012166	ssc:100153052|	100153052|	SMS|	http://www.genome.jp/kegg-bin/show_pathway?ssc00410/ssc:100153052%09red
Axon guidance	KEGG PATHWAY	ssc04360	2	119	0.206829	0.705002	ENSSSCG00000010081|ENSSSCG00000026556	ssc:100153927|ssc:100624508|	100153927|100624508|	MAPK1, ERK2|SEMA3C|	http://www.genome.jp/kegg-bin/show_pathway?ssc04360/ssc:100153927%09red/ssc:100624508%09red
Prion diseases	KEGG PATHWAY	ssc05020	1	34	0.217478	0.705002	ENSSSCG00000010081	ssc:100153927|	100153927|	MAPK1, ERK2|	http://www.genome.jp/kegg-bin/show_pathway?ssc05020/ssc:100153927%09red
Hepatitis C	KEGG PATHWAY	ssc05160	2	127	0.227291	0.705002	ENSSSCG00000010081|ENSSSCG00000027291	ssc:100153927|ssc:396880|	100153927|396880|	MAPK1, ERK2|IL8, AMCF-I, CXCL8|	http://www.genome.jp/kegg-bin/show_pathway?ssc05160/ssc:100153927%09red/ssc:396880%09red
Pyruvate metabolism	KEGG PATHWAY	ssc00620	1	37	0.233768	0.705002	ENSSSCG00000026100	ssc:100621710|	100621710|	|	http://www.genome.jp/kegg-bin/show_pathway?ssc00620/ssc:100621710%09red
Cysteine and methionine metabolism	KEGG PATHWAY	ssc00270	1	37	0.233768	0.705002	ENSSSCG00000012166	ssc:100153052|	100153052|	SMS|	http://www.genome.jp/kegg-bin/show_pathway?ssc00270/ssc:100153052%09red
Primary immunodeficiency	KEGG PATHWAY	ssc05340	1	37	0.233768	0.705002	ENSSSCG00000009356	ssc:100155648|	100155648|	RFXAP|	http://www.genome.jp/kegg-bin/show_pathway?ssc05340/ssc:100155648%09red
Insulin signaling pathway	KEGG PATHWAY	ssc04910	2	133	0.242733	0.705002	ENSSSCG00000010081|ENSSSCG00000012411	ssc:100153927|ssc:100525092|	100153927|100525092|	MAPK1, ERK2| |	http://www.genome.jp/kegg-bin/show_pathway?ssc04910/ssc:100153927%09red/ssc:100525092%09red
FoxO signaling pathway	KEGG PATHWAY	ssc04068	2	133	0.242733	0.705002	ENSSSCG00000010081|ENSSSCG00000006206	ssc:100153927|ssc:100521447|	100153927|100521447|	MAPK1, ERK2|SGK3|	http://www.genome.jp/kegg-bin/show_pathway?ssc04068/ssc:100153927%09red/ssc:100521447%09red
Fatty acid degradation	KEGG PATHWAY	ssc00071	1	41	0.254965	0.705002	ENSSSCG00000004510	ssc:100312959|	100312959|	ACAA2|	http://www.genome.jp/kegg-bin/show_pathway?ssc00071/ssc:100312959%09red
Aldosterone-regulated sodium reabsorption	KEGG PATHWAY	ssc04960	1	41	0.254965	0.705002	ENSSSCG00000010081	ssc:100153927|	100153927|	MAPK1, ERK2|	http://www.genome.jp/kegg-bin/show_pathway?ssc04960/ssc:100153927%09red
Basal transcription factors	KEGG PATHWAY	ssc03022	1	42	0.260172	0.705002	ENSSSCG00000010597	ssc:100152210|	100152210|	TAF5|	http://www.genome.jp/kegg-bin/show_pathway?ssc03022/ssc:100152210%09red
Alcoholism	KEGG PATHWAY	ssc05034	2	143	0.268553	0.705002	ENSSSCG00000010081|ENSSSCG00000012410	ssc:100153927|ssc:100523762|	100153927|100523762|	MAPK1, ERK2| |	http://www.genome.jp/kegg-bin/show_pathway?ssc05034/ssc:100153927%09red/ssc:100523762%09red
Intestinal immune network for IgA production	KEGG PATHWAY	ssc04672	1	44	0.270479	0.705002	ENSSSCG00000026872	ssc:100127162|	100127162|	APRIL|	http://www.genome.jp/kegg-bin/show_pathway?ssc04672/ssc:100127162%09red
Fatty acid metabolism	KEGG PATHWAY	ssc01212	1	45	0.275579	0.705002	ENSSSCG00000004510	ssc:100312959|	100312959|	ACAA2|	http://www.genome.jp/kegg-bin/show_pathway?ssc01212/ssc:100312959%09red
Valine, leucine and isoleucine degradation	KEGG PATHWAY	ssc00280	1	46	0.280643	0.705002	ENSSSCG00000004510	ssc:100312959|	100312959|	ACAA2|	http://www.genome.jp/kegg-bin/show_pathway?ssc00280/ssc:100312959%09red
Hepatitis B	KEGG PATHWAY	ssc05161	2	151	0.289208	0.705002	ENSSSCG00000010081|ENSSSCG00000027291	ssc:100153927|ssc:396880|	100153927|396880|	MAPK1, ERK2|IL8, AMCF-I, CXCL8|	http://www.genome.jp/kegg-bin/show_pathway?ssc05161/ssc:100153927%09red/ssc:396880%09red
Type II diabetes mellitus	KEGG PATHWAY	ssc04930	1	48	0.290667	0.705002	ENSSSCG00000010081	ssc:100153927|	100153927|	MAPK1, ERK2|	http://www.genome.jp/kegg-bin/show_pathway?ssc04930/ssc:100153927%09red
Endometrial cancer	KEGG PATHWAY	ssc05213	1	49	0.295626	0.705002	ENSSSCG00000010081	ssc:100153927|	100153927|	MAPK1, ERK2|	http://www.genome.jp/kegg-bin/show_pathway?ssc05213/ssc:100153927%09red
Glutathione metabolism	KEGG PATHWAY	ssc00480	1	50	0.300551	0.705002	ENSSSCG00000012166	ssc:100153052|	100153052|	SMS|	http://www.genome.jp/kegg-bin/show_pathway?ssc00480/ssc:100153052%09red
Steroid hormone biosynthesis	KEGG PATHWAY	ssc00140	1	51	0.305442	0.705002	ENSSSCG00000001476	ssc:100154372|	100154372|	HSD17B8|	http://www.genome.jp/kegg-bin/show_pathway?ssc00140/ssc:100154372%09red
Metabolic pathways	KEGG PATHWAY	ssc01100	10	1166	0.306044	0.705002	ENSSSCG00000021062|ENSSSCG00000012166|ENSSSCG00000027073|ENSSSCG00000004510|ENSSSCG00000012061|ENSSSCG00000015332|ENSSSCG00000001476|ENSSSCG00000020848|ENSSSCG00000016893|ENSSSCG00000012000	ssc:100625799|ssc:100153052|ssc:100620687|ssc:100312959|ssc:100154885|ssc:100048952|ssc:100154372|ssc:100625451|ssc:100516161|ssc:100156209|	100625799|100153052|100620687|100312959|100154885|100048952|100154372|100625451|100516161|100156209|	DGKB|SMS| |ACAA2|PIGP|PON1|HSD17B8|CMBL|NDUFS4|GBE1|	http://www.genome.jp/kegg-bin/show_pathway?ssc01100/ssc:100625451%09red/ssc:100625799%09red/ssc:100154885%09red/ssc:100312959%09red/ssc:100156209%09red/ssc:100153052%09red/ssc:100154372%09red/ssc:100620687%09red/ssc:100048952%09red/ssc:100516161%09red
Non-small cell lung cancer	KEGG PATHWAY	ssc05223	1	52	0.310299	0.705002	ENSSSCG00000010081	ssc:100153927|	100153927|	MAPK1, ERK2|	http://www.genome.jp/kegg-bin/show_pathway?ssc05223/ssc:100153927%09red
Non-alcoholic fatty liver disease (NAFLD)	KEGG PATHWAY	ssc04932	2	160	0.312364	0.705002	ENSSSCG00000027291|ENSSSCG00000016893	ssc:396880|ssc:100516161|	396880|100516161|	IL8, AMCF-I, CXCL8|NDUFS4|	http://www.genome.jp/kegg-bin/show_pathway?ssc04932/ssc:396880%09red/ssc:100516161%09red
Acute myeloid leukemia	KEGG PATHWAY	ssc05221	1	54	0.319912	0.705002	ENSSSCG00000010081	ssc:100153927|	100153927|	MAPK1, ERK2|	http://www.genome.jp/kegg-bin/show_pathway?ssc05221/ssc:100153927%09red
Glycerolipid metabolism	KEGG PATHWAY	ssc00561	1	54	0.319912	0.705002	ENSSSCG00000021062	ssc:100625799|	100625799|	DGKB|	http://www.genome.jp/kegg-bin/show_pathway?ssc00561/ssc:100625799%09red
Malaria	KEGG PATHWAY	ssc05144	1	54	0.319912	0.705002	ENSSSCG00000027291	ssc:396880|	396880|	IL8, AMCF-I, CXCL8|	http://www.genome.jp/kegg-bin/show_pathway?ssc05144/ssc:396880%09red
Arginine and proline metabolism	KEGG PATHWAY	ssc00330	1	55	0.324668	0.705002	ENSSSCG00000012166	ssc:100153052|	100153052|	SMS|	http://www.genome.jp/kegg-bin/show_pathway?ssc00330/ssc:100153052%09red
Influenza A	KEGG PATHWAY	ssc05164	2	168	0.332816	0.705002	ENSSSCG00000010081|ENSSSCG00000027291	ssc:100153927|ssc:396880|	100153927|396880|	MAPK1, ERK2|IL8, AMCF-I, CXCL8|	http://www.genome.jp/kegg-bin/show_pathway?ssc05164/ssc:100153927%09red/ssc:396880%09red
VEGF signaling pathway	KEGG PATHWAY	ssc04370	1	58	0.338739	0.705002	ENSSSCG00000010081	ssc:100153927|	100153927|	MAPK1, ERK2|	http://www.genome.jp/kegg-bin/show_pathway?ssc04370/ssc:100153927%09red
Long-term depression	KEGG PATHWAY	ssc04730	1	59	0.343365	0.705002	ENSSSCG00000010081	ssc:100153927|	100153927|	MAPK1, ERK2|	http://www.genome.jp/kegg-bin/show_pathway?ssc04730/ssc:100153927%09red
Chemokine signaling pathway	KEGG PATHWAY	ssc04062	2	173	0.345513	0.705002	ENSSSCG00000010081|ENSSSCG00000027291	ssc:100153927|ssc:396880|	100153927|396880|	MAPK1, ERK2|IL8, AMCF-I, CXCL8|	http://www.genome.jp/kegg-bin/show_pathway?ssc04062/ssc:100153927%09red/ssc:396880%09red
mTOR signaling pathway	KEGG PATHWAY	ssc04150	1	60	0.347958	0.705002	ENSSSCG00000010081	ssc:100153927|	100153927|	MAPK1, ERK2|	http://www.genome.jp/kegg-bin/show_pathway?ssc04150/ssc:100153927%09red
Tuberculosis	KEGG PATHWAY	ssc05152	2	174	0.348043	0.705002	ENSSSCG00000010081|ENSSSCG00000009356	ssc:100153927|ssc:100155648|	100153927|100155648|	MAPK1, ERK2|RFXAP|	http://www.genome.jp/kegg-bin/show_pathway?ssc05152/ssc:100153927%09red/ssc:100155648%09red
Alzheimer's disease	KEGG PATHWAY	ssc05010	2	175	0.35057	0.705002	ENSSSCG00000010081|ENSSSCG00000016893	ssc:100153927|ssc:100516161|	100153927|100516161|	MAPK1, ERK2|NDUFS4|	http://www.genome.jp/kegg-bin/show_pathway?ssc05010/ssc:100153927%09red/ssc:100516161%09red
Glioma	KEGG PATHWAY	ssc05214	1	61	0.352519	0.705002	ENSSSCG00000010081	ssc:100153927|	100153927|	MAPK1, ERK2|	http://www.genome.jp/kegg-bin/show_pathway?ssc05214/ssc:100153927%09red
Pancreatic cancer	KEGG PATHWAY	ssc05212	1	63	0.361547	0.705002	ENSSSCG00000010081	ssc:100153927|	100153927|	MAPK1, ERK2|	http://www.genome.jp/kegg-bin/show_pathway?ssc05212/ssc:100153927%09red
Fc epsilon RI signaling pathway	KEGG PATHWAY	ssc04664	1	63	0.361547	0.705002	ENSSSCG00000010081	ssc:100153927|	100153927|	MAPK1, ERK2|	http://www.genome.jp/kegg-bin/show_pathway?ssc04664/ssc:100153927%09red
Leishmaniasis	KEGG PATHWAY	ssc05140	1	63	0.361547	0.705002	ENSSSCG00000010081	ssc:100153927|	100153927|	MAPK1, ERK2|	http://www.genome.jp/kegg-bin/show_pathway?ssc05140/ssc:100153927%09red
Viral myocarditis	KEGG PATHWAY	ssc05416	1	63	0.361547	0.705002	ENSSSCG00000009281	ssc:100623668|	100623668|	|	http://www.genome.jp/kegg-bin/show_pathway?ssc05416/ssc:100623668%09red
Renal cell carcinoma	KEGG PATHWAY	ssc05211	1	64	0.366014	0.705002	ENSSSCG00000010081	ssc:100153927|	100153927|	MAPK1, ERK2|	http://www.genome.jp/kegg-bin/show_pathway?ssc05211/ssc:100153927%09red
Legionellosis	KEGG PATHWAY	ssc05134	1	64	0.366014	0.705002	ENSSSCG00000027291	ssc:396880|	396880|	IL8, AMCF-I, CXCL8|	http://www.genome.jp/kegg-bin/show_pathway?ssc05134/ssc:396880%09red
Prolactin signaling pathway	KEGG PATHWAY	ssc04917	1	67	0.379229	0.705002	ENSSSCG00000010081	ssc:100153927|	100153927|	MAPK1, ERK2|	http://www.genome.jp/kegg-bin/show_pathway?ssc04917/ssc:100153927%09red
Arrhythmogenic right ventricular cardiomyopathy (ARVC)	KEGG PATHWAY	ssc05412	1	67	0.379229	0.705002	ENSSSCG00000009281	ssc:100623668|	100623668|	|	http://www.genome.jp/kegg-bin/show_pathway?ssc05412/ssc:100623668%09red
Antigen processing and presentation	KEGG PATHWAY	ssc04612	1	68	0.383573	0.705002	ENSSSCG00000009356	ssc:100155648|	100155648|	RFXAP|	http://www.genome.jp/kegg-bin/show_pathway?ssc04612/ssc:100155648%09red
RIG-I-like receptor signaling pathway	KEGG PATHWAY	ssc04622	1	68	0.383573	0.705002	ENSSSCG00000027291	ssc:396880|	396880|	IL8, AMCF-I, CXCL8|	http://www.genome.jp/kegg-bin/show_pathway?ssc04622/ssc:396880%09red
Colorectal cancer	KEGG PATHWAY	ssc05210	1	68	0.383573	0.705002	ENSSSCG00000010081	ssc:100153927|	100153927|	MAPK1, ERK2|	http://www.genome.jp/kegg-bin/show_pathway?ssc05210/ssc:100153927%09red
Long-term potentiation	KEGG PATHWAY	ssc04720	1	68	0.383573	0.705002	ENSSSCG00000010081	ssc:100153927|	100153927|	MAPK1, ERK2|	http://www.genome.jp/kegg-bin/show_pathway?ssc04720/ssc:100153927%09red
Viral carcinogenesis	KEGG PATHWAY	ssc05203	2	189	0.385571	0.705002	ENSSSCG00000010081|ENSSSCG00000012410	ssc:100153927|ssc:100523762|	100153927|100523762|	MAPK1, ERK2| |	http://www.genome.jp/kegg-bin/show_pathway?ssc05203/ssc:100153927%09red/ssc:100523762%09red
Melanoma	KEGG PATHWAY	ssc05218	1	69	0.387886	0.705002	ENSSSCG00000010081	ssc:100153927|	100153927|	MAPK1, ERK2|	http://www.genome.jp/kegg-bin/show_pathway?ssc05218/ssc:100153927%09red
Chronic myeloid leukemia	KEGG PATHWAY	ssc05220	1	69	0.387886	0.705002	ENSSSCG00000010081	ssc:100153927|	100153927|	MAPK1, ERK2|	http://www.genome.jp/kegg-bin/show_pathway?ssc05220/ssc:100153927%09red
Huntington's disease	KEGG PATHWAY	ssc05016	2	190	0.388041	0.705002	ENSSSCG00000002347|ENSSSCG00000016893	ssc:100156521|ssc:100516161|	100156521|100516161|	DNAL1|NDUFS4|	http://www.genome.jp/kegg-bin/show_pathway?ssc05016/ssc:100156521%09red/ssc:100516161%09red
Proteoglycans in cancer	KEGG PATHWAY	ssc05205	2	192	0.392968	0.705002	ENSSSCG00000010627|ENSSSCG00000010081	ssc:100157112|ssc:100153927|	100157112|100153927|	PDCD4|MAPK1, ERK2|	http://www.genome.jp/kegg-bin/show_pathway?ssc05205/ssc:100153927%09red/ssc:100157112%09red
Adherens junction	KEGG PATHWAY	ssc04520	1	71	0.396424	0.705002	ENSSSCG00000010081	ssc:100153927|	100153927|	MAPK1, ERK2|	http://www.genome.jp/kegg-bin/show_pathway?ssc04520/ssc:100153927%09red
B cell receptor signaling pathway	KEGG PATHWAY	ssc04662	1	72	0.400648	0.705002	ENSSSCG00000010081	ssc:100153927|	100153927|	MAPK1, ERK2|	http://www.genome.jp/kegg-bin/show_pathway?ssc04662/ssc:100153927%09red
Complement and coagulation cascades	KEGG PATHWAY	ssc04610	1	73	0.404843	0.705002	ENSSSCG00000025463	ssc:397388|	397388|	PROS1, PROS|	http://www.genome.jp/kegg-bin/show_pathway?ssc04610/ssc:397388%09red
Bacterial invasion of epithelial cells	KEGG PATHWAY	ssc05100	1	73	0.404843	0.705002	ENSSSCG00000030197	ssc:100627990|	100627990|	|	http://www.genome.jp/kegg-bin/show_pathway?ssc05100/ssc:100627990%09red
TGF-beta signaling pathway	KEGG PATHWAY	ssc04350	1	74	0.409009	0.705002	ENSSSCG00000010081	ssc:100153927|	100153927|	MAPK1, ERK2|	http://www.genome.jp/kegg-bin/show_pathway?ssc04350/ssc:100153927%09red
Hypertrophic cardiomyopathy (HCM)	KEGG PATHWAY	ssc05410	1	78	0.425384	0.705002	ENSSSCG00000009281	ssc:100623668|	100623668|	|	http://www.genome.jp/kegg-bin/show_pathway?ssc05410/ssc:100623668%09red
Phosphatidylinositol signaling system	KEGG PATHWAY	ssc04070	1	79	0.429407	0.705002	ENSSSCG00000021062	ssc:100625799|	100625799|	DGKB|	http://www.genome.jp/kegg-bin/show_pathway?ssc04070/ssc:100625799%09red
Fc gamma R-mediated phagocytosis	KEGG PATHWAY	ssc04666	1	81	0.437368	0.705002	ENSSSCG00000010081	ssc:100153927|	100153927|	MAPK1, ERK2|	http://www.genome.jp/kegg-bin/show_pathway?ssc04666/ssc:100153927%09red
Glycerophospholipid metabolism	KEGG PATHWAY	ssc00564	1	83	0.44522	0.705002	ENSSSCG00000021062	ssc:100625799|	100625799|	DGKB|	http://www.genome.jp/kegg-bin/show_pathway?ssc00564/ssc:100625799%09red
Dilated cardiomyopathy	KEGG PATHWAY	ssc05414	1	84	0.449105	0.705002	ENSSSCG00000009281	ssc:100623668|	100623668|	|	http://www.genome.jp/kegg-bin/show_pathway?ssc05414/ssc:100623668%09red
Progesterone-mediated oocyte maturation	KEGG PATHWAY	ssc04914	1	85	0.452962	0.705002	ENSSSCG00000010081	ssc:100153927|	100153927|	MAPK1, ERK2|	http://www.genome.jp/kegg-bin/show_pathway?ssc04914/ssc:100153927%09red
Prostate cancer	KEGG PATHWAY	ssc05215	1	85	0.452962	0.705002	ENSSSCG00000010081	ssc:100153927|	100153927|	MAPK1, ERK2|	http://www.genome.jp/kegg-bin/show_pathway?ssc05215/ssc:100153927%09red
ErbB signaling pathway	KEGG PATHWAY	ssc04012	1	85	0.452962	0.705002	ENSSSCG00000010081	ssc:100153927|	100153927|	MAPK1, ERK2|	http://www.genome.jp/kegg-bin/show_pathway?ssc04012/ssc:100153927%09red
GnRH signaling pathway	KEGG PATHWAY	ssc04912	1	86	0.456793	0.705002	ENSSSCG00000010081	ssc:100153927|	100153927|	MAPK1, ERK2|	http://www.genome.jp/kegg-bin/show_pathway?ssc04912/ssc:100153927%09red
Cytokine-cytokine receptor interaction	KEGG PATHWAY	ssc04060	2	223	0.46682	0.705002	ENSSSCG00000027291|ENSSSCG00000026872	ssc:396880|ssc:100127162|	396880|100127162|	IL8, AMCF-I, CXCL8|APRIL|	http://www.genome.jp/kegg-bin/show_pathway?ssc04060/ssc:396880%09red/ssc:100127162%09red
NF-kappa B signaling pathway	KEGG PATHWAY	ssc04064	1	90	0.471852	0.705002	ENSSSCG00000027291	ssc:396880|	396880|	IL8, AMCF-I, CXCL8|	http://www.genome.jp/kegg-bin/show_pathway?ssc04064/ssc:396880%09red
Gap junction	KEGG PATHWAY	ssc04540	1	90	0.471852	0.705002	ENSSSCG00000010081	ssc:100153927|	100153927|	MAPK1, ERK2|	http://www.genome.jp/kegg-bin/show_pathway?ssc04540/ssc:100153927%09red
Morphine addiction	KEGG PATHWAY	ssc05032	1	90	0.471852	0.705002	ENSSSCG00000001810	ssc:100514527|	100514527|	PDE8A|	http://www.genome.jp/kegg-bin/show_pathway?ssc05032/ssc:100514527%09red
Melanogenesis	KEGG PATHWAY	ssc04916	1	95	0.490093	0.71203	ENSSSCG00000010081	ssc:100153927|	100153927|	MAPK1, ERK2|	http://www.genome.jp/kegg-bin/show_pathway?ssc04916/ssc:100153927%09red
Retrograde endocannabinoid signaling	KEGG PATHWAY	ssc04723	1	95	0.490093	0.71203	ENSSSCG00000010081	ssc:100153927|	100153927|	MAPK1, ERK2|	http://www.genome.jp/kegg-bin/show_pathway?ssc04723/ssc:100153927%09red
Estrogen signaling pathway	KEGG PATHWAY	ssc04915	1	97	0.497213	0.71203	ENSSSCG00000010081	ssc:100153927|	100153927|	MAPK1, ERK2|	http://www.genome.jp/kegg-bin/show_pathway?ssc04915/ssc:100153927%09red
Circadian entrainment	KEGG PATHWAY	ssc04713	1	98	0.500736	0.71203	ENSSSCG00000010081	ssc:100153927|	100153927|	MAPK1, ERK2|	http://www.genome.jp/kegg-bin/show_pathway?ssc04713/ssc:100153927%09red
HIF-1 signaling pathway	KEGG PATHWAY	ssc04066	1	104	0.521364	0.71203	ENSSSCG00000010081	ssc:100153927|	100153927|	MAPK1, ERK2|	http://www.genome.jp/kegg-bin/show_pathway?ssc04066/ssc:100153927%09red
Amoebiasis	KEGG PATHWAY	ssc05146	1	107	0.531358	0.71203	ENSSSCG00000027291	ssc:396880|	396880|	IL8, AMCF-I, CXCL8|	http://www.genome.jp/kegg-bin/show_pathway?ssc05146/ssc:396880%09red
T cell receptor signaling pathway	KEGG PATHWAY	ssc04660	1	107	0.531358	0.71203	ENSSSCG00000010081	ssc:100153927|	100153927|	MAPK1, ERK2|	http://www.genome.jp/kegg-bin/show_pathway?ssc04660/ssc:100153927%09red
Oocyte meiosis	KEGG PATHWAY	ssc04114	1	107	0.531358	0.71203	ENSSSCG00000010081	ssc:100153927|	100153927|	MAPK1, ERK2|	http://www.genome.jp/kegg-bin/show_pathway?ssc04114/ssc:100153927%09red
Natural killer cell mediated cytotoxicity	KEGG PATHWAY	ssc04650	1	108	0.534643	0.71203	ENSSSCG00000010081	ssc:100153927|	100153927|	MAPK1, ERK2|	http://www.genome.jp/kegg-bin/show_pathway?ssc04650/ssc:100153927%09red
TNF signaling pathway	KEGG PATHWAY	ssc04668	1	109	0.537905	0.71203	ENSSSCG00000010081	ssc:100153927|	100153927|	MAPK1, ERK2|	http://www.genome.jp/kegg-bin/show_pathway?ssc04668/ssc:100153927%09red
Serotonergic synapse	KEGG PATHWAY	ssc04726	1	112	0.547556	0.71203	ENSSSCG00000010081	ssc:100153927|	100153927|	MAPK1, ERK2|	http://www.genome.jp/kegg-bin/show_pathway?ssc04726/ssc:100153927%09red
Cholinergic synapse	KEGG PATHWAY	ssc04725	1	113	0.550728	0.71203	ENSSSCG00000010081	ssc:100153927|	100153927|	MAPK1, ERK2|	http://www.genome.jp/kegg-bin/show_pathway?ssc04725/ssc:100153927%09red
Thyroid hormone signaling pathway	KEGG PATHWAY	ssc04919	1	113	0.550728	0.71203	ENSSSCG00000010081	ssc:100153927|	100153927|	MAPK1, ERK2|	http://www.genome.jp/kegg-bin/show_pathway?ssc04919/ssc:100153927%09red
Toxoplasmosis	KEGG PATHWAY	ssc05145	1	115	0.557006	0.71203	ENSSSCG00000010081	ssc:100153927|	100153927|	MAPK1, ERK2|	http://www.genome.jp/kegg-bin/show_pathway?ssc05145/ssc:100153927%09red
Vascular smooth muscle contraction	KEGG PATHWAY	ssc04270	1	117	0.563197	0.71203	ENSSSCG00000010081	ssc:100153927|	100153927|	MAPK1, ERK2|	http://www.genome.jp/kegg-bin/show_pathway?ssc04270/ssc:100153927%09red
Neurotrophin signaling pathway	KEGG PATHWAY	ssc04722	1	118	0.56626	0.71203	ENSSSCG00000010081	ssc:100153927|	100153927|	MAPK1, ERK2|	http://www.genome.jp/kegg-bin/show_pathway?ssc04722/ssc:100153927%09red
Glutamatergic synapse	KEGG PATHWAY	ssc04724	1	123	0.581259	0.713606	ENSSSCG00000010081	ssc:100153927|	100153927|	MAPK1, ERK2|	http://www.genome.jp/kegg-bin/show_pathway?ssc04724/ssc:100153927%09red
Spliceosome	KEGG PATHWAY	ssc03040	1	129	0.598578	0.713606	ENSSSCG00000023216	ssc:102158859|	102158859|	|	http://www.genome.jp/kegg-bin/show_pathway?ssc03040/ssc:102158859%09red
Signaling pathways regulating pluripotency of stem cells	KEGG PATHWAY	ssc04550	1	132	0.606969	0.713606	ENSSSCG00000010081	ssc:100153927|	100153927|	MAPK1, ERK2|	http://www.genome.jp/kegg-bin/show_pathway?ssc04550/ssc:100153927%09red
Platelet activation	KEGG PATHWAY	ssc04611	1	132	0.606969	0.713606	ENSSSCG00000010081	ssc:100153927|	100153927|	MAPK1, ERK2|	http://www.genome.jp/kegg-bin/show_pathway?ssc04611/ssc:100153927%09red
Measles	KEGG PATHWAY	ssc05162	1	133	0.609727	0.713606	ENSSSCG00000012123	ssc:100513057|	100513057|	RAB9A|	http://www.genome.jp/kegg-bin/show_pathway?ssc05162/ssc:100513057%09red
Osteoclast differentiation	KEGG PATHWAY	ssc04380	1	133	0.609727	0.713606	ENSSSCG00000010081	ssc:100153927|	100153927|	MAPK1, ERK2|	http://www.genome.jp/kegg-bin/show_pathway?ssc04380/ssc:100153927%09red
Oxidative phosphorylation	KEGG PATHWAY	ssc00190	1	134	0.612465	0.713606	ENSSSCG00000016893	ssc:100516161|	100516161|	NDUFS4|	http://www.genome.jp/kegg-bin/show_pathway?ssc00190/ssc:100516161%09red
Ubiquitin mediated proteolysis	KEGG PATHWAY	ssc04120	1	134	0.612465	0.713606	ENSSSCG00000012637	ssc:100739402|	100739402|	|	http://www.genome.jp/kegg-bin/show_pathway?ssc04120/ssc:100739402%09red
Adrenergic signaling in cardiomyocytes	KEGG PATHWAY	ssc04261	1	141	0.631109	0.727985	ENSSSCG00000010081	ssc:100153927|	100153927|	MAPK1, ERK2|	http://www.genome.jp/kegg-bin/show_pathway?ssc04261/ssc:100153927%09red
Ribosome	KEGG PATHWAY	ssc03010	1	143	0.63627	0.727985	ENSSSCG00000028634	ssc:100739849|	100739849|	|	http://www.genome.jp/kegg-bin/show_pathway?ssc03010/ssc:100739849%09red
Parkinson's disease	KEGG PATHWAY	ssc05012	1	151	0.656207	0.739605	ENSSSCG00000016893	ssc:100516161|	100516161|	NDUFS4|	http://www.genome.jp/kegg-bin/show_pathway?ssc05012/ssc:100516161%09red
Pathways in cancer	KEGG PATHWAY	ssc05200	2	319	0.658073	0.739605	ENSSSCG00000010081|ENSSSCG00000027291	ssc:100153927|ssc:396880|	100153927|396880|	MAPK1, ERK2|IL8, AMCF-I, CXCL8|	http://www.genome.jp/kegg-bin/show_pathway?ssc05200/ssc:100153927%09red/ssc:396880%09red
Transcriptional misregulation in cancer	KEGG PATHWAY	ssc05202	1	156	0.668112	0.743109	ENSSSCG00000027291	ssc:396880|	396880|	IL8, AMCF-I, CXCL8|	http://www.genome.jp/kegg-bin/show_pathway?ssc05202/ssc:396880%09red
PI3K-Akt signaling pathway	KEGG PATHWAY	ssc04151	2	328	0.672894	0.743109	ENSSSCG00000010081|ENSSSCG00000006206	ssc:100153927|ssc:100521447|	100153927|100521447|	MAPK1, ERK2|SGK3|	http://www.genome.jp/kegg-bin/show_pathway?ssc04151/ssc:100153927%09red/ssc:100521447%09red
Oxytocin signaling pathway	KEGG PATHWAY	ssc04921	1	161	0.679607	0.744053	ENSSSCG00000010081	ssc:100153927|	100153927|	MAPK1, ERK2|	http://www.genome.jp/kegg-bin/show_pathway?ssc04921/ssc:100153927%09red
cGMP-PKG signaling pathway	KEGG PATHWAY	ssc04022	1	167	0.69288	0.752101	ENSSSCG00000010081	ssc:100153927|	100153927|	MAPK1, ERK2|	http://www.genome.jp/kegg-bin/show_pathway?ssc04022/ssc:100153927%09red
Calcium signaling pathway	KEGG PATHWAY	ssc04020	1	182	0.72372	0.767993	ENSSSCG00000012411	ssc:100525092|	100525092|	|	http://www.genome.jp/kegg-bin/show_pathway?ssc04020/ssc:100525092%09red
Herpes simplex infection	KEGG PATHWAY	ssc05168	1	182	0.72372	0.767993	ENSSSCG00000010597	ssc:100152210|	100152210|	TAF5|	http://www.genome.jp/kegg-bin/show_pathway?ssc05168/ssc:100152210%09red
Purine metabolism	KEGG PATHWAY	ssc00230	1	183	0.725663	0.767993	ENSSSCG00000001810	ssc:100514527|	100514527|	PDE8A|	http://www.genome.jp/kegg-bin/show_pathway?ssc00230/ssc:100514527%09red
Focal adhesion	KEGG PATHWAY	ssc04510	1	194	0.746159	0.783066	ENSSSCG00000010081	ssc:100153927|	100153927|	MAPK1, ERK2|	http://www.genome.jp/kegg-bin/show_pathway?ssc04510/ssc:100153927%09red
Regulation of actin cytoskeleton	KEGG PATHWAY	ssc04810	1	198	0.753229	0.783066	ENSSSCG00000010081	ssc:100153927|	100153927|	MAPK1, ERK2|	http://www.genome.jp/kegg-bin/show_pathway?ssc04810/ssc:100153927%09red
cAMP signaling pathway	KEGG PATHWAY	ssc04024	1	201	0.758402	0.783066	ENSSSCG00000010081	ssc:100153927|	100153927|	MAPK1, ERK2|	http://www.genome.jp/kegg-bin/show_pathway?ssc04024/ssc:100153927%09red
Rap1 signaling pathway	KEGG PATHWAY	ssc04015	1	208	0.770058	0.788689	ENSSSCG00000010081	ssc:100153927|	100153927|	MAPK1, ERK2|	http://www.genome.jp/kegg-bin/show_pathway?ssc04015/ssc:100153927%09red
Ras signaling pathway	KEGG PATHWAY	ssc04014	1	223	0.793187	0.805878	ENSSSCG00000010081	ssc:100153927|	100153927|	MAPK1, ERK2|	http://www.genome.jp/kegg-bin/show_pathway?ssc04014/ssc:100153927%09red
MicroRNAs in cancer	KEGG PATHWAY	ssc05206	1	228	0.800371	0.806723	ENSSSCG00000010627	ssc:100157112|	100157112|	PDCD4|	http://www.genome.jp/kegg-bin/show_pathway?ssc05206/ssc:100157112%09red
MAPK signaling pathway	KEGG PATHWAY	ssc04010	1	249	0.827931	0.827931	ENSSSCG00000010081	ssc:100153927|	100153927|	MAPK1, ERK2|	http://www.genome.jp/kegg-bin/show_pathway?ssc04010/ssc:100153927%09red
--------------------
#Term	Database	ID	Input number	Background number	P-Value	Corrected P-Value	Input	KO	Entrez_ID	KO_name	Hyperlink
--------------------
#Term	Database	ID	Input number	Background number	P-Value	Corrected P-Value	Input	KO	Entrez_ID	KO_name	Hyperlink
--------------------

## Sheet: VR2332 UP
##Databases: KEGG PATHWAY
##Statistical test method: hypergeometric test / Fisher's exact test
##FDR correction method: Benjamini and Hochberg
#Term	Database	ID	Input number	Background number	P-Value	Corrected P-Value	Input	KO	Entrez_ID	KO_name	Hyperlink
Influenza A	KEGG PATHWAY	ssc05164	26	168	0.000197331	0.0336434	ENSSSCG00000000396|ENSSSCG00000002002|ENSSSCG00000015801|ENSSSCG00000009881|ENSSSCG00000001453|ENSSSCG00000009882|ENSSSCG00000021504|ENSSSCG00000008977|ENSSSCG00000030408|ENSSSCG00000020906|ENSSSCG00000009636|ENSSSCG00000005163|ENSSSCG00000003395|ENSSSCG00000028711|ENSSSCG00000029475|ENSSSCG00000000068|ENSSSCG00000008648|ENSSSCG00000012117|ENSSSCG00000006543|ENSSSCG00000016057|ENSSSCG00000017723|…	ssc:396923|ssc:780415|ssc:100037937|ssc:595128|ssc:100135040|ssc:397570|ssc:100310806|ssc:494019|ssc:396723|ssc:406191|ssc:100154839|ssc:445459|ssc:100518131|ssc:397319|ssc:100622285|ssc:100156226|ssc:396752|ssc:100037296|ssc:100523784|ssc:396655|ssc:397422|ssc:100037289|ssc:397128|ssc:100523731|ssc:100522198|ssc:100157336|	396923|780415|100037937|595128|100135040|397570|100310806|494019|396723|406191|100154839|445459|100518131|397319|100622285|100156226|396752|100037296|100523784|396655|397422|100037289|397128|100523731|100522198|100157336|	STAT2| |TLR3, TLR-3|OAS2|SLA-DRA, SLA-DR-alpha, SLA-DRA1|OAS1|IFN-ALPHAOMEGA|CXCL10|DDX58, RHIV-1, RIG-1, RIG-I, RLR-1|TNFSF10, TRAIL| |IFNB1, IFN-beta, IFNb|PIK3CD|CASP1| |EP300|RSAD2, CIG6, IRG6|TLR7|ADAR|STAT1|CCL2, MCP-1|IRF7|MX1, Mx, MxA| |NUP98|PML|	http://www.genome.jp/kegg-bin/show_pathway?ssc05164/ssc:100154839%09red/ssc:445459%09red/ssc:100622285%09red/ssc:100156226%09red/ssc:406191%09red/ssc:100135040%09red/ssc:595128%09red/ssc:100523784%09red/ssc:780415%09red/ssc:100522198%09red/ssc:396723%09red/ssc:100037296%09red/ssc:397319%09red/ssc:397128%09red/ssc:397570%09red/ssc:100037937%09red/ssc:100523731%09red/ssc:494019%09red/ssc:100157336%…
Herpes simplex infection	KEGG PATHWAY	ssc05168	27	182	0.000275765	0.0336434	ENSSSCG00000000396|ENSSSCG00000002002|ENSSSCG00000025593|ENSSSCG00000015801|ENSSSCG00000001341|ENSSSCG00000009881|ENSSSCG00000001453|ENSSSCG00000009882|ENSSSCG00000021504|ENSSSCG00000028278|ENSSSCG00000024161|ENSSSCG00000030408|ENSSSCG00000016263|ENSSSCG00000007655|ENSSSCG00000020893|ENSSSCG00000005163|ENSSSCG00000025181|ENSSSCG00000000068|ENSSSCG00000001509|ENSSSCG00000010453|ENSSSCG00000017723|…	ssc:396923|ssc:780415|ssc:100519722|ssc:100037937|ssc:100135031|ssc:595128|ssc:100135040|ssc:397570|ssc:100310806|ssc:100737040|ssc:396650|ssc:396723|ssc:100516940|ssc:100515475|ssc:733649|ssc:445459|ssc:100523731|ssc:100156226|ssc:100524813|ssc:100153038|ssc:397422|ssc:100037289|ssc:396655|ssc:100156182|ssc:396623|ssc:733650|ssc:100157336|	396923|780415|100519722|100037937|100135031|595128|100135040|397570|100310806|100737040|396650|396723|100516940|100515475|733649|445459|100523731|100156226|100524813|100153038|397422|100037289|396655|100156182|396623|733650|100157336|	STAT2| |TAP2|TLR3, TLR-3|SLA-2, SLA-B|OAS2|SLA-DRA, SLA-DR-alpha, SLA-DRA1|OAS1|IFN-ALPHAOMEGA|POLR2A|SLA-7|DDX58, RHIV-1, RIG-1, RIG-I, RLR-1|SP100| |TAP1|IFNB1, IFN-beta, IFNb| |EP300|DAXX|IFIT1|CCL2, MCP-1|IRF7|STAT1|TAB2|TLR2|TAP2|PML|	http://www.genome.jp/kegg-bin/show_pathway?ssc05168/ssc:100737040%09red/ssc:100153038%09red/ssc:100515475%09red/ssc:445459%09red/ssc:100156226%09red/ssc:100135040%09red/ssc:595128%09red/ssc:100524813%09red/ssc:780415%09red/ssc:100519722%09red/ssc:733649%09red/ssc:396723%09red/ssc:100523731%09red/ssc:396623%09red/ssc:397570%09red/ssc:100037937%09red/ssc:100156182%09red/ssc:100157336%09red/ssc:1003…
Measles	KEGG PATHWAY	ssc05162	20	133	0.0013969	0.0933353	ENSSSCG00000004154|ENSSSCG00000012117|ENSSSCG00000006543|ENSSSCG00000025181|ENSSSCG00000000396|ENSSSCG00000005163|ENSSSCG00000002002|ENSSSCG00000004110|ENSSSCG00000030408|ENSSSCG00000012853|ENSSSCG00000012077|ENSSSCG00000009881|ENSSSCG00000009882|ENSSSCG00000009002|ENSSSCG00000003395|ENSSSCG00000021504|ENSSSCG00000020906|ENSSSCG00000009636|ENSSSCG00000016057|ENSSSCG00000012397	ssc:100622156|ssc:100037296|ssc:100523784|ssc:100523731|ssc:396923|ssc:445459|ssc:780415|ssc:100156182|ssc:396723|ssc:100037289|ssc:397128|ssc:595128|ssc:397570|ssc:396623|ssc:100518131|ssc:100310806|ssc:406191|ssc:100154839|ssc:396655|ssc:397156|	100622156|100037296|100523784|100523731|396923|445459|780415|100156182|396723|100037289|397128|595128|397570|396623|100518131|100310806|406191|100154839|396655|397156|	TNFAIP3|TLR7|ADAR| |STAT2|IFNB1, IFN-beta, IFNb| |TAB2|DDX58, RHIV-1, RIG-1, RIG-I, RLR-1|IRF7|MX1, Mx, MxA|OAS2|OAS1|TLR2|PIK3CD|IFN-ALPHAOMEGA|TNFSF10, TRAIL| |STAT1|IL2RG|	http://www.genome.jp/kegg-bin/show_pathway?ssc05162/ssc:100518131%09red/ssc:780415%09red/ssc:100523731%09red/ssc:100154839%09red/ssc:397156%09red/ssc:100622156%09red/ssc:100156182%09red/ssc:445459%09red/ssc:396723%09red/ssc:100037289%09red/ssc:100037296%09red/ssc:100310806%09red/ssc:397128%09red/ssc:396923%09red/ssc:396623%09red/ssc:396655%09red/ssc:595128%09red/ssc:397570%09red/ssc:100523784%09r…
Cytosolic DNA-sensing pathway	KEGG PATHWAY	ssc04623	12	61	0.00179258	0.0933353	ENSSSCG00000006543|ENSSSCG00000005163|ENSSSCG00000012853|ENSSSCG00000017698|ENSSSCG00000028711|ENSSSCG00000011358|ENSSSCG00000021504|ENSSSCG00000008977|ENSSSCG00000014349|ENSSSCG00000007508|ENSSSCG00000030408|ENSSSCG00000021383	ssc:100523784|ssc:445459|ssc:100037289|ssc:396668|ssc:397319|ssc:100155669|ssc:100310806|ssc:494019|ssc:100217389|ssc:100144524|ssc:396723|ssc:100516408|	100523784|445459|100037289|396668|397319|100155669|100310806|494019|100217389|100144524|396723|100516408|	ADAR|IFNB1, IFN-beta, IFNb|IRF7|CCL4, MIP-1BETA, MIP1b, SCY4A|CASP1|TREX1|IFN-ALPHAOMEGA|CXCL10|TMEM173, STING|ZBP1, DAI|DDX58, RHIV-1, RIG-1, RIG-I, RLR-1|MB21D1|	http://www.genome.jp/kegg-bin/show_pathway?ssc04623/ssc:396723%09red/ssc:100037289%09red/ssc:396668%09red/ssc:445459%09red/ssc:100144524%09red/ssc:494019%09red/ssc:100155669%09red/ssc:100310806%09red/ssc:397319%09red/ssc:100516408%09red/ssc:100217389%09red/ssc:100523784%09red
Hepatitis C	KEGG PATHWAY	ssc05160	19	127	0.00191261	0.0933353	ENSSSCG00000030900|ENSSSCG00000003395|ENSSSCG00000025181|ENSSSCG00000000396|ENSSSCG00000005163|ENSSSCG00000010453|ENSSSCG00000002002|ENSSSCG00000015801|ENSSSCG00000012853|ENSSSCG00000030408|ENSSSCG00000009881|ENSSSCG00000009657|ENSSSCG00000008478|ENSSSCG00000009882|ENSSSCG00000021504|ENSSSCG00000009759|ENSSSCG00000028512|ENSSSCG00000026969|ENSSSCG00000016057	ssc:396801|ssc:100518131|ssc:100523731|ssc:396923|ssc:445459|ssc:100153038|ssc:780415|ssc:100037937|ssc:100037289|ssc:396723|ssc:595128|ssc:397090|ssc:100520187|ssc:397570|ssc:100310806|ssc:397018|ssc:396801|ssc:100518251|ssc:396655|	396801|100518131|100523731|396923|445459|100153038|780415|100037937|100037289|396723|595128|397090|100520187|397570|100310806|397018|396801|100518251|396655|	LDLR|PIK3CD| |STAT2|IFNB1, IFN-beta, IFNb|IFIT1| |TLR3, TLR-3|IRF7|DDX58, RHIV-1, RIG-1, RIG-I, RLR-1|OAS2|PPP2R2A| |OAS1|IFN-ALPHAOMEGA|SCARB1|LDLR|KRAS|STAT1|	http://www.genome.jp/kegg-bin/show_pathway?ssc05160/ssc:396801%09red/ssc:100518251%09red/ssc:445459%09red/ssc:397018%09red/ssc:100037289%09red/ssc:100153038%09red/ssc:100523731%09red/ssc:397090%09red/ssc:100037937%09red/ssc:396723%09red/ssc:100310806%09red/ssc:396923%09red/ssc:396655%09red/ssc:595128%09red/ssc:397570%09red/ssc:100520187%09red/ssc:100518131%09red/ssc:780415%09red
Endocytosis	KEGG PATHWAY	ssc04144	25	206	0.00535129	0.201771	ENSSSCG00000027209|ENSSSCG00000028762|ENSSSCG00000022080|ENSSSCG00000028108|ENSSSCG00000028887|ENSSSCG00000022486|ENSSSCG00000024161|ENSSSCG00000012397|ENSSSCG00000030900|ENSSSCG00000028512|ENSSSCG00000014441|ENSSSCG00000024344|ENSSSCG00000011237|ENSSSCG00000020666|ENSSSCG00000017666|ENSSSCG00000004952|ENSSSCG00000012324|ENSSSCG00000027812|ENSSSCG00000012160|ENSSSCG00000021886|ENSSSCG00000001341|…	ssc:100623422|ssc:100511491|ssc:396849|ssc:100626125|ssc:414900|ssc:100621690|ssc:396650|ssc:397156|ssc:396801|ssc:396801|ssc:100517086|ssc:414371|ssc:100512811|ssc:100738234|ssc:100271929|ssc:397260|ssc:100520058|ssc:100622196|ssc:100522530|ssc:100517086|ssc:100135031|ssc:100154193|ssc:100038019|ssc:100316852|ssc:100157336|	100623422|100511491|396849|100626125|414900|100621690|396650|397156|396801|396801|100517086|414371|100512811|100738234|100271929|397260|100520058|100622196|100522530|100517086|100135031|100154193|100038019|100316852|100157336|	ACAP1|VPS37C|RHOA|ASAP3|PLD2|CBLB|SLA-7|IL2RG|LDLR|LDLR|CSF1R|CCR5|PDCD6IP|EHD4|CLTC|SMAD3, MADH3|IQSEC2|IQSEC1|SH3KBP1|CSF1R|SLA-2, SLA-B|GBF1| |SH3GLB1|PML|	http://www.genome.jp/kegg-bin/show_pathway?ssc04144/ssc:100738234%09red/ssc:100520058%09red/ssc:414900%09red/ssc:100522530%09red/ssc:100316852%09red/ssc:100511491%09red/ssc:414371%09red/ssc:100038019%09red/ssc:397260%09red/ssc:396849%09red/ssc:100626125%09red/ssc:396801%09red/ssc:100517086%09red/ssc:100157336%09red/ssc:100512811%09red/ssc:100622196%09red/ssc:100154193%09red/ssc:100623422%09red/ss…
Toll-like receptor signaling pathway	KEGG PATHWAY	ssc04620	15	101	0.00578852	0.201771	ENSSSCG00000004110|ENSSSCG00000011877|ENSSSCG00000005163|ENSSSCG00000017700|ENSSSCG00000015801|ENSSSCG00000016573|ENSSSCG00000012853|ENSSSCG00000017698|ENSSSCG00000012117|ENSSSCG00000009002|ENSSSCG00000003395|ENSSSCG00000021504|ENSSSCG00000008977|ENSSSCG00000016057|ENSSSCG00000012118	ssc:100156182|ssc:397441|ssc:445459|ssc:494459|ssc:100037937|ssc:100515633|ssc:100037289|ssc:396668|ssc:100037296|ssc:396623|ssc:100518131|ssc:100310806|ssc:494019|ssc:396655|ssc:397384|	100156182|397441|445459|494459|100037937|100515633|100037289|396668|100037296|396623|100518131|100310806|494019|396655|397384|	TAB2|CD86|IFNB1, IFN-beta, IFNb|CCL3L1|TLR3, TLR-3|IRF5, IRF5_TV1|IRF7|CCL4, MIP-1BETA, MIP1b, SCY4A|TLR7|TLR2|PIK3CD|IFN-ALPHAOMEGA|CXCL10|STAT1|TLR8|	http://www.genome.jp/kegg-bin/show_pathway?ssc04620/ssc:100518131%09red/ssc:397384%09red/ssc:100037289%09red/ssc:100310806%09red/ssc:100156182%09red/ssc:100037937%09red/ssc:494019%09red/ssc:100037296%09red/ssc:396668%09red/ssc:100515633%09red/ssc:494459%09red/ssc:396623%09red/ssc:396655%09red/ssc:397441%09red/ssc:445459%09red
Phagosome	KEGG PATHWAY	ssc04145	19	147	0.00789473	0.240789	ENSSSCG00000008056|ENSSSCG00000001341|ENSSSCG00000025593|ENSSSCG00000013545|ENSSSCG00000009759|ENSSSCG00000006979|ENSSSCG00000000293|ENSSSCG00000016147|ENSSSCG00000001453|ENSSSCG00000016887|ENSSSCG00000009002|ENSSSCG00000002538|ENSSSCG00000000773|ENSSSCG00000000675|ENSSSCG00000020893|ENSSSCG00000024161|ENSSSCG00000006678|ENSSSCG00000025173|ENSSSCG00000012890	ssc:100518959|ssc:100135031|ssc:100519722|ssc:100736584|ssc:397018|ssc:100511665|ssc:100155091|ssc:100521692|ssc:100135040|ssc:397483|ssc:396623|ssc:100037291|ssc:100518253|ssc:445464|ssc:733649|ssc:396650|ssc:613130|ssc:733650|ssc:100521769|	100518959|100135031|100519722|100736584|397018|100511665|100155091|100521692|100135040|397483|396623|100037291|100518253|445464|733649|396650|613130|733650|100521769|	ATP6V0C|SLA-2, SLA-B|TAP2| |SCARB1|MSR1|ITGA5|PIKFYVE|SLA-DRA, SLA-DR-alpha, SLA-DRA1|ITGA2, VLA-2|TLR2|DYNC1H1|TUBA8|C1R|TAP1|SLA-7|FCGR1A|TAP2|TCIRG1|	http://www.genome.jp/kegg-bin/show_pathway?ssc04145/ssc:100521769%09red/ssc:100518253%09red/ssc:100511665%09red/ssc:100037291%09red/ssc:733649%09red/ssc:100135031%09red/ssc:733650%09red/ssc:445464%09red/ssc:100519722%09red/ssc:100736584%09red/ssc:100518959%09red/ssc:396623%09red/ssc:100155091%09red/ssc:100135040%09red/ssc:397018%09red/ssc:100521692%09red/ssc:396650%09red/ssc:397483%09red/ssc:6131…
Antigen processing and presentation	KEGG PATHWAY	ssc04612	11	68	0.00985622	0.257284	ENSSSCG00000004700|ENSSSCG00000025593|ENSSSCG00000001341|ENSSSCG00000002004|ENSSSCG00000001453|ENSSSCG00000002006|ENSSSCG00000001507|ENSSSCG00000020893|ENSSSCG00000024161|ENSSSCG00000025173|ENSSSCG00000006625	ssc:100156204|ssc:100519722|ssc:100135031|ssc:397522|ssc:100135040|ssc:397572|ssc:100155428|ssc:733649|ssc:396650|ssc:733650|ssc:100517711|	100156204|100519722|100135031|397522|100135040|397572|100155428|733649|396650|733650|100517711|	PDIA3, grp-58|TAP2|SLA-2, SLA-B|PSME2|SLA-DRA, SLA-DR-alpha, SLA-DRA1|PSME1|TAPBP|TAP1|SLA-7|TAP2|RFX5|	http://www.genome.jp/kegg-bin/show_pathway?ssc04612/ssc:100519722%09red/ssc:733649%09red/ssc:100135031%09red/ssc:733650%09red/ssc:100155428%09red/ssc:100135040%09red/ssc:100517711%09red/ssc:397522%09red/ssc:397572%09red/ssc:396650%09red/ssc:100156204%09red
Lysine degradation	KEGG PATHWAY	ssc00310	9	50	0.0105444	0.257284	ENSSSCG00000022734|ENSSSCG00000009395|ENSSSCG00000006508|ENSSSCG00000015820|ENSSSCG00000020663|ENSSSCG00000023324|ENSSSCG00000006324|ENSSSCG00000023928|ENSSSCG00000009806	ssc:100514805|ssc:100157885|ssc:100155920|ssc:100520868|ssc:100514805|ssc:100623006|ssc:100153809|ssc:664651|ssc:100156137|	100514805|100157885|100155920|100520868|100514805|100623006|100153809|664651|100156137|	KMT2C, MLL3|SETDB2, CAB39L|ASH1L|WHSC1L1|KMT2C, MLL3|KMT2A, MLL|ALDH9A1|SUV39H2|SETD1B|	http://www.genome.jp/kegg-bin/show_pathway?ssc00310/ssc:100623006%09red/ssc:100155920%09red/ssc:100520868%09red/ssc:100156137%09red/ssc:100153809%09red/ssc:100514805%09red/ssc:100157885%09red/ssc:664651%09red
ABC transporters	KEGG PATHWAY	ssc02010	8	43	0.0131728	0.292196	ENSSSCG00000025593|ENSSSCG00000005423|ENSSSCG00000015390|ENSSSCG00000020893|ENSSSCG00000017561|ENSSSCG00000002362|ENSSSCG00000025173|ENSSSCG00000027745	ssc:100519722|ssc:100519123|ssc:396910|ssc:733649|ssc:100513231|ssc:100152503|ssc:733650|ssc:100620416|	100519722|100519123|396910|733649|100513231|100152503|733650|100620416|	TAP2| |ABCB1, MDR1, P-gp|TAP1|ABCC3| |TAP2|ABCG1|	http://www.genome.jp/kegg-bin/show_pathway?ssc02010/ssc:100519722%09red/ssc:100519123%09red/ssc:100513231%09red/ssc:733649%09red/ssc:733650%09red/ssc:396910%09red/ssc:100152503%09red/ssc:100620416%09red
Tuberculosis	KEGG PATHWAY	ssc05152	20	174	0.0192503	0.352226	ENSSSCG00000008056|ENSSSCG00000005163|ENSSSCG00000022080|ENSSSCG00000004895|ENSSSCG00000015652|ENSSSCG00000009123|ENSSSCG00000006625|ENSSSCG00000028637|ENSSSCG00000001453|ENSSSCG00000000769|ENSSSCG00000009002|ENSSSCG00000023926|ENSSSCG00000024096|ENSSSCG00000021504|ENSSSCG00000000068|ENSSSCG00000010301|ENSSSCG00000012890|ENSSSCG00000006678|ENSSSCG00000016057|ENSSSCG00000026940	ssc:100518959|ssc:445459|ssc:396849|ssc:100738877|ssc:397106|ssc:397674|ssc:100517711|ssc:397055|ssc:100135040|ssc:594852|ssc:396623|ssc:100518835|ssc:100518835|ssc:100310806|ssc:100156226|ssc:396603|ssc:100521769|ssc:613130|ssc:396655|ssc:100154896|	100518959|445459|396849|100738877|397106|397674|100517711|397055|100135040|594852|396623|100518835|100518835|100310806|100156226|396603|100521769|613130|396655|100154896|	ATP6V0C|IFNB1, IFN-beta, IFNb|RHOA| |IL10, CSIF, IL-10|CAMK2D|RFX5|CYP27B1|SLA-DRA, SLA-DR-alpha, SLA-DRA1|BID|TLR2|RIPK2|RIPK2|IFN-ALPHAOMEGA|EP300|PPP3CB|TCIRG1|FCGR1A|STAT1|CASP10|	http://www.genome.jp/kegg-bin/show_pathway?ssc05152/ssc:100521769%09red/ssc:397055%09red/ssc:100518835%09red/ssc:100310806%09red/ssc:100154896%09red/ssc:445459%09red/ssc:613130%09red/ssc:396603%09red/ssc:397106%09red/ssc:100156226%09red/ssc:100738877%09red/ssc:396849%09red/ssc:100517711%09red/ssc:396623%09red/ssc:397674%09red/ssc:100135040%09red/ssc:396655%09red/ssc:100518959%09red/ssc:594852%09r…
Jak-STAT signaling pathway	KEGG PATHWAY	ssc04630	18	153	0.0210876	0.352226	ENSSSCG00000016832|ENSSSCG00000015652|ENSSSCG00000000396|ENSSSCG00000021815|ENSSSCG00000026324|ENSSSCG00000002002|ENSSSCG00000027855|ENSSSCG00000027628|ENSSSCG00000008478|ENSSSCG00000022486|ENSSSCG00000003395|ENSSSCG00000021504|ENSSSCG00000000068|ENSSSCG00000006161|ENSSSCG00000005965|ENSSSCG00000016057|ENSSSCG00000012397|ENSSSCG00000005163	ssc:100271930|ssc:397106|ssc:396923|ssc:733692|ssc:100627648|ssc:780415|ssc:100307052|ssc:399522|ssc:100520187|ssc:100621690|ssc:100518131|ssc:100310806|ssc:100156226|ssc:397253|ssc:448810|ssc:396655|ssc:397156|ssc:445459|	100271930|397106|396923|733692|100627648|780415|100307052|399522|100520187|100621690|100518131|100310806|100156226|397253|448810|396655|397156|445459|	IL7R, CD127|IL10, CSIF, IL-10|STAT2|IL15RA|CRLF2| |SOCS1|IL6R, IL-6Ralpha| |CBLB|PIK3CD|IFN-ALPHAOMEGA|EP300|IL7, IL-7|MYC|STAT1|IL2RG|IFNB1, IFN-beta, IFNb|	http://www.genome.jp/kegg-bin/show_pathway?ssc04630/ssc:100627648%09red/ssc:448810%09red/ssc:397156%09red/ssc:100310806%09red/ssc:397253%09red/ssc:100271930%09red/ssc:445459%09red/ssc:733692%09red/ssc:397106%09red/ssc:100307052%09red/ssc:100520187%09red/ssc:100156226%09red/ssc:396923%09red/ssc:100621690%09red/ssc:396655%09red/ssc:100518131%09red/ssc:399522%09red/ssc:780415%09red
Viral carcinogenesis	KEGG PATHWAY	ssc05203	21	189	0.0227456	0.352226	ENSSSCG00000003395|ENSSSCG00000011833|ENSSSCG00000026454|ENSSSCG00000002002|ENSSSCG00000022080|ENSSSCG00000024344|ENSSSCG00000021411|ENSSSCG00000003488|ENSSSCG00000017414|ENSSSCG00000010224|ENSSSCG00000006250|ENSSSCG00000025181|ENSSSCG00000016263|ENSSSCG00000026757|ENSSSCG00000016520|ENSSSCG00000000068|ENSSSCG00000024161|ENSSSCG00000001341|ENSSSCG00000026969|ENSSSCG00000001516|ENSSSCG00000012853	ssc:100518131|ssc:100157729|ssc:397278|ssc:780415|ssc:396849|ssc:414371|ssc:100157327|ssc:100511934|ssc:100524215|ssc:100038004|ssc:100152890|ssc:100523731|ssc:100516940|ssc:100157327|ssc:100520468|ssc:100156226|ssc:396650|ssc:100135031|ssc:100518251|ssc:397543|ssc:100037289|	100518131|100157729|397278|780415|396849|414371|100157327|100511934|100524215|100038004|100152890|100523731|100516940|100157327|100520468|100156226|396650|100135031|100518251|397543|100037289|	PIK3CD|DLG1|PMAIP1, TN3| |RHOA|CCR5|HIST1H2BD|UBR4|KAT2A|EGR2|LYN| |SP100|HIST1H2BD|CREB3L2|EP300|SLA-7|SLA-2, SLA-B|KRAS|BAK, Bak1|IRF7|	http://www.genome.jp/kegg-bin/show_pathway?ssc05203/ssc:100520468%09red/ssc:100518251%09red/ssc:100523731%09red/ssc:100038004%09red/ssc:100037289%09red/ssc:100152890%09red/ssc:100135031%09red/ssc:100157729%09red/ssc:414371%09red/ssc:100157327%09red/ssc:397543%09red/ssc:100156226%09red/ssc:100511934%09red/ssc:396849%09red/ssc:100516940%09red/ssc:397278%09red/ssc:396650%09red/ssc:100518131%09red/ss…
RIG-I-like receptor signaling pathway	KEGG PATHWAY	ssc04622	10	68	0.0230968	0.352226	ENSSSCG00000027982|ENSSSCG00000005163|ENSSSCG00000012853|ENSSSCG00000017416|ENSSSCG00000029475|ENSSSCG00000021504|ENSSSCG00000008977|ENSSSCG00000014349|ENSSSCG00000030408|ENSSSCG00000026940	ssc:100145895|ssc:445459|ssc:100037289|ssc:100524520|ssc:100622285|ssc:100310806|ssc:494019|ssc:100217389|ssc:396723|ssc:100154896|	100145895|445459|100037289|100524520|100622285|100310806|494019|100217389|396723|100154896|	ISG15|IFNB1, IFN-beta, IFNb|IRF7|DHX58, LGP2| |IFN-ALPHAOMEGA|CXCL10|TMEM173, STING|DDX58, RHIV-1, RIG-1, RIG-I, RLR-1|CASP10|	http://www.genome.jp/kegg-bin/show_pathway?ssc04622/ssc:100037289%09red/ssc:100310806%09red/ssc:100154896%09red/ssc:100622285%09red/ssc:396723%09red/ssc:494019%09red/ssc:100524520%09red/ssc:100145895%09red/ssc:100217389%09red/ssc:445459%09red
Colorectal cancer	KEGG PATHWAY	ssc05210	10	68	0.0230968	0.352226	ENSSSCG00000010638|ENSSSCG00000003395|ENSSSCG00000005738|ENSSSCG00000022080|ENSSSCG00000004895|ENSSSCG00000014207|ENSSSCG00000011226|ENSSSCG00000005965|ENSSSCG00000026969|ENSSSCG00000004952	ssc:100153922|ssc:100518131|ssc:100513970|ssc:396849|ssc:100738877|ssc:100517932|ssc:100038019|ssc:448810|ssc:100518251|ssc:397260|	100153922|100518131|100513970|396849|100738877|100517932|100038019|448810|100518251|397260|	TCF7L2|PIK3CD|RALGDS|RHOA| |APC, APC1| |MYC|KRAS|SMAD3, MADH3|	http://www.genome.jp/kegg-bin/show_pathway?ssc05210/ssc:448810%09red/ssc:100518251%09red/ssc:100513970%09red/ssc:100038019%09red/ssc:100153922%09red/ssc:397260%09red/ssc:100738877%09red/ssc:396849%09red/ssc:100518131%09red/ssc:100517932%09red
Transcriptional misregulation in cancer	KEGG PATHWAY	ssc05202	18	156	0.0246438	0.353711	ENSSSCG00000025551|ENSSSCG00000023593|ENSSSCG00000011877|ENSSSCG00000006678|ENSSSCG00000017428|ENSSSCG00000014441|ENSSSCG00000002282|ENSSSCG00000011226|ENSSSCG00000012262|ENSSSCG00000024152|ENSSSCG00000023324|ENSSSCG00000013307|ENSSSCG00000001880|ENSSSCG00000021886|ENSSSCG00000005965|ENSSSCG00000001912|ENSSSCG00000017202|ENSSSCG00000001561	ssc:100737965|ssc:100627910|ssc:397441|ssc:613130|ssc:397592|ssc:100517086|ssc:100517170|ssc:100038019|ssc:100154376|ssc:100157726|ssc:100623006|ssc:100512825|ssc:100621221|ssc:100517086|ssc:448810|ssc:100157336|ssc:396970|ssc:100156210|	100737965|100627910|397441|613130|397592|100517086|100517170|100038019|100154376|100157726|100623006|100512825|100621221|100517086|448810|100157336|396970|100156210|	|AFF1|CD86|FCGR1A|JUP|CSF1R|MAX| |KDM6A|ETV6|KMT2A, MLL|LMO2|SIN3A|CSF1R|MYC|PML|H3F3A|ETV7|	http://www.genome.jp/kegg-bin/show_pathway?ssc05202/ssc:448810%09red/ssc:100157726%09red/ssc:100512825%09red/ssc:613130%09red/ssc:100623006%09red/ssc:100517086%09red/ssc:100157336%09red/ssc:100737965%09red/ssc:100038019%09red/ssc:100154376%09red/ssc:397592%09red/ssc:100517170%09red/ssc:396970%09red/ssc:100156210%09red/ssc:397441%09red/ssc:100627910%09red/ssc:100621221%09red
NOD-like receptor signaling pathway	KEGG PATHWAY	ssc04621	8	50	0.0270743	0.367007	ENSSSCG00000004154|ENSSSCG00000029367|ENSSSCG00000017723|ENSSSCG00000004110|ENSSSCG00000028711|ENSSSCG00000023926|ENSSSCG00000024096|ENSSSCG00000012203	ssc:100622156|ssc:100627238|ssc:397422|ssc:100156182|ssc:397319|ssc:100518835|ssc:100518835|ssc:100517796|	100622156|100627238|397422|100156182|397319|100518835|100518835|100517796|	TNFAIP3|CARD6|CCL2, MCP-1|TAB2|CASP1|RIPK2|RIPK2|TAB3|	http://www.genome.jp/kegg-bin/show_pathway?ssc04621/ssc:100518835%09red/ssc:100622156%09red/ssc:100156182%09red/ssc:397422%09red/ssc:100627238%09red/ssc:397319%09red/ssc:100517796%09red
Lysosome	KEGG PATHWAY	ssc04142	14	115	0.0309078	0.396922	ENSSSCG00000017087|ENSSSCG00000010798|ENSSSCG00000004044|ENSSSCG00000021567|ENSSSCG00000025932|ENSSSCG00000008867|ENSSSCG00000017666|ENSSSCG00000023080|ENSSSCG00000008056|ENSSSCG00000014627|ENSSSCG00000030648|ENSSSCG00000008980|ENSSSCG00000012890|ENSSSCG00000003707	ssc:100515283|ssc:100524333|ssc:397214|ssc:100517533|ssc:100627432|ssc:100737564|ssc:100271929|ssc:100623352|ssc:100518959|ssc:100518980|ssc:100516188|ssc:414407|ssc:100521769|ssc:397591|	100515283|100524333|397214|100517533|100627432|100737564|100271929|100623352|100518959|100518980|100516188|414407|100521769|397591|	GM2A|GGA2|IGF2R, M6P/IGF2R|PPT1| |CTSO|CLTC|TPP1|ATP6V0C|SMPD1|LAPTM4A|SCARB2|TCIRG1|NPC1|	http://www.genome.jp/kegg-bin/show_pathway?ssc04142/ssc:397214%09red/ssc:100521769%09red/ssc:100517533%09red/ssc:100515283%09red/ssc:397591%09red/ssc:414407%09red/ssc:100623352%09red/ssc:100271929%09red/ssc:100627432%09red/ssc:100524333%09red/ssc:100518980%09red/ssc:100518959%09red/ssc:100516188%09red/ssc:100737564%09red
Hepatitis B	KEGG PATHWAY	ssc05161	17	151	0.0341121	0.409922	ENSSSCG00000030408|ENSSSCG00000003395|ENSSSCG00000000396|ENSSSCG00000021504|ENSSSCG00000004895|ENSSSCG00000015801|ENSSSCG00000012853|ENSSSCG00000010224|ENSSSCG00000005163|ENSSSCG00000009002|ENSSSCG00000009664|ENSSSCG00000016520|ENSSSCG00000000068|ENSSSCG00000005965|ENSSSCG00000026969|ENSSSCG00000016057|ENSSSCG00000026940	ssc:396723|ssc:100518131|ssc:396923|ssc:100310806|ssc:100738877|ssc:100037937|ssc:100037289|ssc:100038004|ssc:445459|ssc:396623|ssc:100157507|ssc:100520468|ssc:100156226|ssc:448810|ssc:100518251|ssc:396655|ssc:100154896|	396723|100518131|396923|100310806|100738877|100037937|100037289|100038004|445459|396623|100157507|100520468|100156226|448810|100518251|396655|100154896|	DDX58, RHIV-1, RIG-1, RIG-I, RLR-1|PIK3CD|STAT2|IFN-ALPHAOMEGA| |TLR3, TLR-3|IRF7|EGR2|IFNB1, IFN-beta, IFNb|TLR2|PTK2B|CREB3L2|EP300|MYC|KRAS|STAT1|CASP10|	http://www.genome.jp/kegg-bin/show_pathway?ssc05161/ssc:100520468%09red/ssc:448810%09red/ssc:445459%09red/ssc:100038004%09red/ssc:396623%09red/ssc:100037289%09red/ssc:100310806%09red/ssc:100154896%09red/ssc:100037937%09red/ssc:396723%09red/ssc:100156226%09red/ssc:100738877%09red/ssc:396923%09red/ssc:100157507%09red/ssc:396655%09red/ssc:100518131%09red/ssc:100518251%09red
Cytokine-cytokine receptor interaction	KEGG PATHWAY	ssc04060	23	223	0.0352801	0.409922	ENSSSCG00000021815|ENSSSCG00000021504|ENSSSCG00000008977|ENSSSCG00000012397|ENSSSCG00000016832|ENSSSCG00000014441|ENSSSCG00000026324|ENSSSCG00000015652|ENSSSCG00000020906|ENSSSCG00000015487|ENSSSCG00000006161|ENSSSCG00000016113|ENSSSCG00000005163|ENSSSCG00000026633|ENSSSCG00000021886|ENSSSCG00000009542|ENSSSCG00000017700|ENSSSCG00000017723|ENSSSCG00000017721|ENSSSCG00000024344|ENSSSCG00000027628|…	ssc:733692|ssc:100310806|ssc:494019|ssc:397156|ssc:100271930|ssc:100517086|ssc:100627648|ssc:397106|ssc:406191|ssc:100516458|ssc:397253|ssc:100127483|ssc:445459|ssc:574055|ssc:100517086|ssc:100038026|ssc:494459|ssc:397422|ssc:100302703|ssc:414371|ssc:399522|ssc:100038019|ssc:396668|	733692|100310806|494019|397156|100271930|100517086|100627648|397106|406191|100516458|397253|100127483|445459|574055|100517086|100038026|494459|397422|100302703|414371|399522|100038019|396668|	IL15RA|IFN-ALPHAOMEGA|CXCL10|IL2RG|IL7R, CD127|CSF1R|CRLF2|IL10, CSIF, IL-10|TNFSF10, TRAIL|TNFSF18|IL7, IL-7|BMPR2|IFNB1, IFN-beta, IFNb|TNFRSF8|CSF1R|TNFSF13B, BAFF|CCL3L1|CCL2, MCP-1|CCL8|CCR5|IL6R, IL-6Ralpha| |CCL4, MIP-1BETA, MIP1b, SCY4A|	http://www.genome.jp/kegg-bin/show_pathway?ssc04060/ssc:100627648%09red/ssc:574055%09red/ssc:100516458%09red/ssc:445459%09red/ssc:733692%09red/ssc:397106%09red/ssc:406191%09red/ssc:100271930%09red/ssc:100127483%09red/ssc:414371%09red/ssc:100038019%09red/ssc:396668%09red/ssc:399522%09red/ssc:100517086%09red/ssc:494019%09red/ssc:100310806%09red/ssc:397156%09red/ssc:100302703%09red/ssc:397422%09red/…
Notch signaling pathway	KEGG PATHWAY	ssc04330	7	44	0.0382989	0.416457	ENSSSCG00000011876|ENSSSCG00000026362|ENSSSCG00000017414|ENSSSCG00000000449|ENSSSCG00000009761|ENSSSCG00000000068|ENSSSCG00000014971	ssc:100520459|ssc:100499567|ssc:100524215|ssc:100521724|ssc:733643|ssc:100156226|ssc:100739729|	100520459|100499567|100524215|100521724|733643|100156226|100739729|	DTX3L|HES1|KAT2A| | |EP300|MAML2|	http://www.genome.jp/kegg-bin/show_pathway?ssc04330/ssc:733643%09red/ssc:100521724%09red/ssc:100156226%09red/ssc:100739729%09red/ssc:100520459%09red/ssc:100499567%09red/ssc:100524215%09red
Natural killer cell mediated cytotoxicity	KEGG PATHWAY	ssc04650	13	108	0.0392562	0.416457	ENSSSCG00000003395|ENSSSCG00000005163|ENSSSCG00000017006|ENSSSCG00000006851|ENSSSCG00000007797|ENSSSCG00000000769|ENSSSCG00000008478|ENSSSCG00000009664|ENSSSCG00000021504|ENSSSCG00000020906|ENSSSCG00000009636|ENSSSCG00000010301|ENSSSCG00000026969	ssc:100518131|ssc:445459|ssc:100511843|ssc:100737105|ssc:733681|ssc:594852|ssc:100520187|ssc:100157507|ssc:100310806|ssc:406191|ssc:100154839|ssc:396603|ssc:100518251|	100518131|445459|100511843|100737105|733681|594852|100520187|100157507|100310806|406191|100154839|396603|100518251|	PIK3CD|IFNB1, IFN-beta, IFNb|LCP2|VAV3|ITGAL|BID| |PTK2B|IFN-ALPHAOMEGA|TNFSF10, TRAIL| |PPP3CB|KRAS|	http://www.genome.jp/kegg-bin/show_pathway?ssc04650/ssc:100518131%09red/ssc:100518251%09red/ssc:100154839%09red/ssc:100520187%09red/ssc:445459%09red/ssc:733681%09red/ssc:396603%09red/ssc:100737105%09red/ssc:100310806%09red/ssc:100511843%09red/ssc:100157507%09red/ssc:594852%09red/ssc:406191%09red
Proteasome	KEGG PATHWAY	ssc03050	7	46	0.0458484	0.466125	ENSSSCG00000020769|ENSSSCG00000028872|ENSSSCG00000001951|ENSSSCG00000002004|ENSSSCG00000002006|ENSSSCG00000001468|ENSSSCG00000001463	ssc:100620420|ssc:100153464|ssc:100156790|ssc:397522|ssc:397572|ssc:654294|ssc:654294|	100620420|100153464|100156790|397522|397572|654294|654294|	PSMA2|PSMB8|PSMA6|PSME2|PSME1|PSMB9, LMP2|PSMB9, LMP2|	http://www.genome.jp/kegg-bin/show_pathway?ssc03050/ssc:100156790%09red/ssc:100153464%09red/ssc:654294%09red/ssc:397522%09red/ssc:397572%09red/ssc:100620420%09red
Primary immunodeficiency	KEGG PATHWAY	ssc05340	6	37	0.0496506	0.468816	ENSSSCG00000016832|ENSSSCG00000025593|ENSSSCG00000020893|ENSSSCG00000025173|ENSSSCG00000006625|ENSSSCG00000012397	ssc:100271930|ssc:100519722|ssc:733649|ssc:733650|ssc:100517711|ssc:397156|	100271930|100519722|733649|733650|100517711|397156|	IL7R, CD127|TAP2|TAP1|TAP2|RFX5|IL2RG|	http://www.genome.jp/kegg-bin/show_pathway?ssc05340/ssc:100519722%09red/ssc:397156%09red/ssc:733649%09red/ssc:100271930%09red/ssc:733650%09red/ssc:100517711%09red
Staphylococcus aureus infection	KEGG PATHWAY	ssc05150	7	47	0.0499558	0.468816	ENSSSCG00000015652|ENSSSCG00000001422|ENSSSCG00000007797|ENSSSCG00000001453|ENSSSCG00000023868|ENSSSCG00000000675|ENSSSCG00000006678	ssc:397106|ssc:448981|ssc:733681|ssc:100135040|ssc:100625728|ssc:445464|ssc:613130|	397106|448981|733681|100135040|100625728|445464|613130|	IL10, CSIF, IL-10|C2|ITGAL|SLA-DRA, SLA-DR-alpha, SLA-DRA1|C3AR1|C1R|FCGR1A|	http://www.genome.jp/kegg-bin/show_pathway?ssc05150/ssc:100625728%09red/ssc:448981%09red/ssc:733681%09red/ssc:397106%09red/ssc:445464%09red/ssc:613130%09red/ssc:100135040%09red
RNA degradation	KEGG PATHWAY	ssc03018	9	71	0.0614694	0.555501	ENSSSCG00000008399|ENSSSCG00000013124|ENSSSCG00000025233|ENSSSCG00000022880|ENSSSCG00000030404|ENSSSCG00000006063|ENSSSCG00000002799|ENSSSCG00000014009|ENSSSCG00000023976	ssc:100642182|ssc:100514819|ssc:100642182|ssc:100642182|ssc:100625961|ssc:100153958|ssc:100511993|ssc:100516183|ssc:100620800|	100642182|100514819|100642182|100642182|100625961|100153958|100511993|100516183|100620800|	PNPT1|PATL1|PNPT1|PNPT1|PAPD5|PABPC1|CNOT1|CNOT6|DCP1B|	http://www.genome.jp/kegg-bin/show_pathway?ssc03018/ssc:100625961%09red/ssc:100153958%09red/ssc:100511993%09red/ssc:100642182%09red/ssc:100516183%09red/ssc:100514819%09red/ssc:100620800%09red
Tryptophan metabolism	KEGG PATHWAY	ssc00380	6	41	0.0710786	0.611622	ENSSSCG00000025686|ENSSSCG00000030456|ENSSSCG00000015673|ENSSSCG00000003192|ENSSSCG00000006324|ENSSSCG00000007007	ssc:397148|ssc:100625479|ssc:100521160|ssc:100522257|ssc:100153809|ssc:100519877|	397148|100625479|100521160|100522257|100153809|100519877|	KMO| |KYNU|IL4I1|ALDH9A1|IDO1, IDO|	http://www.genome.jp/kegg-bin/show_pathway?ssc00380/ssc:100625479%09red/ssc:397148%09red/ssc:100153809%09red/ssc:100522257%09red/ssc:100519877%09red/ssc:100521160%09red
Hematopoietic cell lineage	KEGG PATHWAY	ssc04640	10	85	0.0726928	0.611622	ENSSSCG00000016832|ENSSSCG00000001849|ENSSSCG00000014441|ENSSSCG00000000293|ENSSSCG00000027628|ENSSSCG00000016887|ENSSSCG00000021886|ENSSSCG00000006678|ENSSSCG00000006161|ENSSSCG00000031023	ssc:100271930|ssc:397520|ssc:100517086|ssc:100155091|ssc:399522|ssc:397483|ssc:100517086|ssc:613130|ssc:397253|ssc:100519934|	100271930|397520|100517086|100155091|399522|397483|100517086|613130|397253|100519934|	IL7R, CD127|ANPEP, APN, PEPN|CSF1R|ITGA5|IL6R, IL-6Ralpha|ITGA2, VLA-2|CSF1R|FCGR1A|IL7, IL-7| |	http://www.genome.jp/kegg-bin/show_pathway?ssc04640/ssc:397253%09red/ssc:100271930%09red/ssc:100517086%09red/ssc:397483%09red/ssc:613130%09red/ssc:397520%09red/ssc:100519934%09red/ssc:100155091%09red/ssc:399522%09red
Osteoclast differentiation	KEGG PATHWAY	ssc04380	14	133	0.0763489	0.620971	ENSSSCG00000003395|ENSSSCG00000000396|ENSSSCG00000005163|ENSSSCG00000014441|ENSSSCG00000017006|ENSSSCG00000027855|ENSSSCG00000011226|ENSSSCG00000004110|ENSSSCG00000008820|ENSSSCG00000002002|ENSSSCG00000010301|ENSSSCG00000021886|ENSSSCG00000006678|ENSSSCG00000016057	ssc:100518131|ssc:396923|ssc:445459|ssc:100517086|ssc:100511843|ssc:100307052|ssc:100038019|ssc:100156182|ssc:404277|ssc:780415|ssc:396603|ssc:100517086|ssc:613130|ssc:396655|	100518131|396923|445459|100517086|100511843|100307052|100038019|100156182|404277|780415|396603|100517086|613130|396655|	PIK3CD|STAT2|IFNB1, IFN-beta, IFNb|CSF1R|LCP2|SOCS1| |TAB2|TEC| |PPP3CB|CSF1R|FCGR1A|STAT1|	http://www.genome.jp/kegg-bin/show_pathway?ssc04380/ssc:100518131%09red/ssc:780415%09red/ssc:404277%09red/ssc:100156182%09red/ssc:100517086%09red/ssc:396603%09red/ssc:100038019%09red/ssc:613130%09red/ssc:100307052%09red/ssc:396923%09red/ssc:396655%09red/ssc:445459%09red/ssc:100511843%09red
Dorso-ventral axis formation	KEGG PATHWAY	ssc04320	4	23	0.0848122	0.623384	ENSSSCG00000024152|ENSSSCG00000008478|ENSSSCG00000026969|ENSSSCG00000001561	ssc:100157726|ssc:100520187|ssc:100518251|ssc:100156210|	100157726|100520187|100518251|100156210|	ETV6| |KRAS|ETV7|	http://www.genome.jp/kegg-bin/show_pathway?ssc04320/ssc:100518251%09red/ssc:100156210%09red/ssc:100157726%09red/ssc:100520187%09red
Acute myeloid leukemia	KEGG PATHWAY	ssc05221	7	54	0.0850901	0.623384	ENSSSCG00000010638|ENSSSCG00000003395|ENSSSCG00000017428|ENSSSCG00000008478|ENSSSCG00000005965|ENSSSCG00000026969|ENSSSCG00000001912	ssc:100153922|ssc:100518131|ssc:397592|ssc:100520187|ssc:448810|ssc:100518251|ssc:100157336|	100153922|100518131|397592|100520187|448810|100518251|100157336|	TCF7L2|PIK3CD|JUP| |MYC|KRAS|PML|	http://www.genome.jp/kegg-bin/show_pathway?ssc05221/ssc:448810%09red/ssc:100518251%09red/ssc:100157336%09red/ssc:100153922%09red/ssc:397592%09red/ssc:100520187%09red/ssc:100518131%09red
Malaria	KEGG PATHWAY	ssc05144	7	54	0.0850901	0.623384	ENSSSCG00000000423|ENSSSCG00000017723|ENSSSCG00000015652|ENSSSCG00000023150|ENSSSCG00000006862|ENSSSCG00000009002|ENSSSCG00000007797	ssc:100627964|ssc:397422|ssc:397106|ssc:100514839|ssc:396925|ssc:396623|ssc:733681|	100627964|397422|397106|100514839|396925|396623|733681|	LRP1|CCL2, MCP-1|IL10, CSIF, IL-10| |VCAM1|TLR2|ITGAL|	http://www.genome.jp/kegg-bin/show_pathway?ssc05144/ssc:397422%09red/ssc:733681%09red/ssc:397106%09red/ssc:100627964%09red/ssc:396925%09red/ssc:396623%09red/ssc:100514839%09red
Chemokine signaling pathway	KEGG PATHWAY	ssc04062	17	173	0.086865	0.623384	ENSSSCG00000017700|ENSSSCG00000003395|ENSSSCG00000000396|ENSSSCG00000022080|ENSSSCG00000024344|ENSSSCG00000017723|ENSSSCG00000017721|ENSSSCG00000006250|ENSSSCG00000006851|ENSSSCG00000017698|ENSSSCG00000008478|ENSSSCG00000009664|ENSSSCG00000008977|ENSSSCG00000026969|ENSSSCG00000016057|ENSSSCG00000016656|ENSSSCG00000015324	ssc:494459|ssc:100518131|ssc:396923|ssc:396849|ssc:414371|ssc:397422|ssc:100302703|ssc:100152890|ssc:100737105|ssc:396668|ssc:100520187|ssc:100157507|ssc:494019|ssc:100518251|ssc:396655|ssc:100522109|ssc:100522202|	494459|100518131|396923|396849|414371|397422|100302703|100152890|100737105|396668|100520187|100157507|494019|100518251|396655|100522109|100522202|	CCL3L1|PIK3CD|STAT2|RHOA|CCR5|CCL2, MCP-1|CCL8|LYN|VAV3|CCL4, MIP-1BETA, MIP1b, SCY4A| |PTK2B|CXCL10|KRAS|STAT1|ELMO1|GNG11|	http://www.genome.jp/kegg-bin/show_pathway?ssc04062/ssc:100522109%09red/ssc:100518251%09red/ssc:100152890%09red/ssc:494459%09red/ssc:100302703%09red/ssc:397422%09red/ssc:494019%09red/ssc:414371%09red/ssc:100522202%09red/ssc:396668%09red/ssc:396849%09red/ssc:396923%09red/ssc:100157507%09red/ssc:396655%09red/ssc:100520187%09red/ssc:100518131%09red/ssc:100737105%09red
NF-kappa B signaling pathway	KEGG PATHWAY	ssc04064	10	90	0.0948382	0.661158	ENSSSCG00000004154|ENSSSCG00000030408|ENSSSCG00000012203|ENSSSCG00000017698|ENSSSCG00000004110|ENSSSCG00000004895|ENSSSCG00000029475|ENSSSCG00000006862|ENSSSCG00000009542|ENSSSCG00000006250	ssc:100622156|ssc:396723|ssc:100517796|ssc:396668|ssc:100156182|ssc:100738877|ssc:100622285|ssc:396925|ssc:100038026|ssc:100152890|	100622156|396723|100517796|396668|100156182|100738877|100622285|396925|100038026|100152890|	TNFAIP3|DDX58, RHIV-1, RIG-1, RIG-I, RLR-1|TAB3|CCL4, MIP-1BETA, MIP1b, SCY4A|TAB2| | |VCAM1|TNFSF13B, BAFF|LYN|	http://www.genome.jp/kegg-bin/show_pathway?ssc04064/ssc:100152890%09red/ssc:100622156%09red/ssc:100156182%09red/ssc:100622285%09red/ssc:396723%09red/ssc:100038026%09red/ssc:396668%09red/ssc:396925%09red/ssc:100517796%09red/ssc:100738877%09red
Pathways in cancer	KEGG PATHWAY	ssc05200	28	319	0.100112	0.678536	ENSSSCG00000022080|ENSSSCG00000016140|ENSSSCG00000000769|ENSSSCG00000022486|ENSSSCG00000024671|ENSSSCG00000004952|ENSSSCG00000017428|ENSSSCG00000014441|ENSSSCG00000008443|ENSSSCG00000004895|ENSSSCG00000003140|ENSSSCG00000010638|ENSSSCG00000002282|ENSSSCG00000026635|ENSSSCG00000000068|ENSSSCG00000021886|ENSSSCG00000005965|ENSSSCG00000009544|ENSSSCG00000003395|ENSSSCG00000010211|ENSSSCG00000014207|…	ssc:396849|ssc:100519058|ssc:594852|ssc:100621690|ssc:100512949|ssc:397260|ssc:397592|ssc:100517086|ssc:100037272|ssc:100738877|ssc:100302504|ssc:100153922|ssc:100517170|ssc:397404|ssc:100156226|ssc:100517086|ssc:448810|ssc:100515336|ssc:100518131|ssc:100155896|ssc:100517932|ssc:100038019|ssc:396655|ssc:397483|ssc:100520187|ssc:100513970|ssc:100518251|ssc:100157336|	396849|100519058|594852|100621690|100512949|397260|397592|100517086|100037272|100738877|100302504|100153922|100517170|397404|100156226|100517086|448810|100515336|100518131|100155896|100517932|100038019|396655|397483|100520187|100513970|100518251|100157336|	RHOA|FZD5|BID|CBLB|WNT9A|SMAD3, MADH3|JUP|CSF1R|EPAS1, EPAS, EPAS-1| |FGF21|TCF7L2|MAX|SLC2A1, GLUT1|EP300|CSF1R|MYC|COL4A1|PIK3CD|CCDC6|APC, APC1| |STAT1|ITGA2, VLA-2| |RALGDS|KRAS|PML|	http://www.genome.jp/kegg-bin/show_pathway?ssc05200/ssc:448810%09red/ssc:100155896%09red/ssc:100513970%09red/ssc:100156226%09red/ssc:397592%09red/ssc:100512949%09red/ssc:100517170%09red/ssc:100302504%09red/ssc:100037272%09red/ssc:594852%09red/ssc:100038019%09red/ssc:100519058%09red/ssc:397260%09red/ssc:100738877%09red/ssc:396849%09red/ssc:100153922%09red/ssc:100517932%09red/ssc:100518251%09red/ss…
Inositol phosphate metabolism	KEGG PATHWAY	ssc00562	7	57	0.103572	0.683014	ENSSSCG00000003395|ENSSSCG00000030474|ENSSSCG00000027340|ENSSSCG00000016147|ENSSSCG00000010092|ENSSSCG00000012035|ENSSSCG00000016050	ssc:100518131|ssc:100516802|ssc:100623115|ssc:100521692|ssc:100157143|ssc:100525664|ssc:100514878|	100518131|100516802|100623115|100521692|100157143|100525664|100514878|	PIK3CD|PIP4K2C|PI4K2B|PIKFYVE|PI4KA|SYNJ1|INPP1|	http://www.genome.jp/kegg-bin/show_pathway?ssc00562/ssc:100514878%09red/ssc:100518131%09red/ssc:100525664%09red/ssc:100516802%09red/ssc:100157143%09red/ssc:100623115%09red/ssc:100521692%09red
Thyroid cancer	KEGG PATHWAY	ssc05216	4	26	0.114647	0.736156	ENSSSCG00000010638|ENSSSCG00000005965|ENSSSCG00000026969|ENSSSCG00000010211	ssc:100153922|ssc:448810|ssc:100518251|ssc:100155896|	100153922|448810|100518251|100155896|	TCF7L2|MYC|KRAS|CCDC6|	http://www.genome.jp/kegg-bin/show_pathway?ssc05216/ssc:448810%09red/ssc:100518251%09red/ssc:100155896%09red/ssc:100153922%09red
T cell receptor signaling pathway	KEGG PATHWAY	ssc04660	11	107	0.119664	0.747311	ENSSSCG00000003395|ENSSSCG00000022080|ENSSSCG00000017006|ENSSSCG00000015652|ENSSSCG00000006851|ENSSSCG00000022486|ENSSSCG00000008478|ENSSSCG00000008820|ENSSSCG00000010301|ENSSSCG00000011833|ENSSSCG00000026969	ssc:100518131|ssc:396849|ssc:100511843|ssc:397106|ssc:100737105|ssc:100621690|ssc:100520187|ssc:404277|ssc:396603|ssc:100157729|ssc:100518251|	100518131|396849|100511843|397106|100737105|100621690|100520187|404277|396603|100157729|100518251|	PIK3CD|RHOA|LCP2|IL10, CSIF, IL-10|VAV3|CBLB| |TEC|PPP3CB|DLG1|KRAS|	http://www.genome.jp/kegg-bin/show_pathway?ssc04660/ssc:100518131%09red/ssc:100518251%09red/ssc:404277%09red/ssc:396603%09red/ssc:100157729%09red/ssc:397106%09red/ssc:100737105%09red/ssc:396849%09red/ssc:100511843%09red/ssc:100621690%09red/ssc:100520187%09red
B cell receptor signaling pathway	KEGG PATHWAY	ssc04662	8	72	0.126156	0.747311	ENSSSCG00000003395|ENSSSCG00000010509|ENSSSCG00000006851|ENSSSCG00000028367|ENSSSCG00000008478|ENSSSCG00000010301|ENSSSCG00000026969|ENSSSCG00000006250	ssc:100518131|ssc:100155165|ssc:100737105|ssc:100525936|ssc:100520187|ssc:396603|ssc:100518251|ssc:100152890|	100518131|100155165|100737105|100525936|100520187|396603|100518251|100152890|	PIK3CD|PIK3AP1|VAV3|DAPP1| |PPP3CB|KRAS|LYN|	http://www.genome.jp/kegg-bin/show_pathway?ssc04662/ssc:100518131%09red/ssc:100518251%09red/ssc:100152890%09red/ssc:396603%09red/ssc:100737105%09red/ssc:100525936%09red/ssc:100155165%09red/ssc:100520187%09red
Endometrial cancer	KEGG PATHWAY	ssc05213	6	49	0.127378	0.747311	ENSSSCG00000010638|ENSSSCG00000003395|ENSSSCG00000014207|ENSSSCG00000008478|ENSSSCG00000005965|ENSSSCG00000026969	ssc:100153922|ssc:100518131|ssc:100517932|ssc:100520187|ssc:448810|ssc:100518251|	100153922|100518131|100517932|100520187|448810|100518251|	TCF7L2|PIK3CD|APC, APC1| |MYC|KRAS|	http://www.genome.jp/kegg-bin/show_pathway?ssc05213/ssc:448810%09red/ssc:100518251%09red/ssc:100153922%09red/ssc:100520187%09red/ssc:100518131%09red/ssc:100517932%09red
Allograft rejection	KEGG PATHWAY	ssc05330	5	38	0.128636	0.747311	ENSSSCG00000001453|ENSSSCG00000024161|ENSSSCG00000015652|ENSSSCG00000011877|ENSSSCG00000001341	ssc:100135040|ssc:396650|ssc:397106|ssc:397441|ssc:100135031|	100135040|396650|397106|397441|100135031|	SLA-DRA, SLA-DR-alpha, SLA-DRA1|SLA-7|IL10, CSIF, IL-10|CD86|SLA-2, SLA-B|	http://www.genome.jp/kegg-bin/show_pathway?ssc05330/ssc:100135040%09red/ssc:100135031%09red/ssc:397441%09red/ssc:396650%09red/ssc:397106%09red
Inflammatory bowel disease (IBD)	KEGG PATHWAY	ssc05321	7	62	0.138743	0.765833	ENSSSCG00000017517|ENSSSCG00000015652|ENSSSCG00000001453|ENSSSCG00000009002|ENSSSCG00000004952|ENSSSCG00000016057|ENSSSCG00000012397	ssc:100518804|ssc:397106|ssc:100135040|ssc:396623|ssc:397260|ssc:396655|ssc:397156|	100518804|397106|100135040|396623|397260|396655|397156|	TBX21|IL10, CSIF, IL-10|SLA-DRA, SLA-DR-alpha, SLA-DRA1|TLR2|SMAD3, MADH3|STAT1|IL2RG|	http://www.genome.jp/kegg-bin/show_pathway?ssc05321/ssc:397156%09red/ssc:100518804%09red/ssc:397106%09red/ssc:397260%09red/ssc:396623%09red/ssc:100135040%09red/ssc:396655%09red
HTLV-I infection	KEGG PATHWAY	ssc05166	22	253	0.140672	0.765833	ENSSSCG00000021815|ENSSSCG00000016140|ENSSSCG00000001341|ENSSSCG00000001453|ENSSSCG00000024671|ENSSSCG00000024161|ENSSSCG00000012397|ENSSSCG00000010224|ENSSSCG00000004952|ENSSSCG00000007797|ENSSSCG00000011833|ENSSSCG00000026635|ENSSSCG00000000068|ENSSSCG00000005965|ENSSSCG00000003395|ENSSSCG00000014207|ENSSSCG00000017414|ENSSSCG00000011226|ENSSSCG00000007606|ENSSSCG00000006862|ENSSSCG00000010301|…	ssc:733692|ssc:100519058|ssc:100135031|ssc:100135040|ssc:100512949|ssc:396650|ssc:397156|ssc:100038004|ssc:397260|ssc:733681|ssc:100157729|ssc:397404|ssc:100156226|ssc:448810|ssc:100518131|ssc:100517932|ssc:100524215|ssc:100038019|ssc:100521781|ssc:396925|ssc:396603|ssc:100518251|	733692|100519058|100135031|100135040|100512949|396650|397156|100038004|397260|733681|100157729|397404|100156226|448810|100518131|100517932|100524215|100038019|100521781|396925|396603|100518251|	IL15RA|FZD5|SLA-2, SLA-B|SLA-DRA, SLA-DR-alpha, SLA-DRA1|WNT9A|SLA-7|IL2RG|EGR2|SMAD3, MADH3|ITGAL|DLG1|SLC2A1, GLUT1|EP300|MYC|PIK3CD|APC, APC1|KAT2A| |TRRAP|VCAM1|PPP3CB|KRAS|	http://www.genome.jp/kegg-bin/show_pathway?ssc05166/ssc:448810%09red/ssc:100512949%09red/ssc:100521781%09red/ssc:733692%09red/ssc:100156226%09red/ssc:100135040%09red/ssc:100519058%09red/ssc:396603%09red/ssc:100038019%09red/ssc:397260%09red/ssc:100524215%09red/ssc:100518251%09red/ssc:733681%09red/ssc:100157729%09red/ssc:396925%09red/ssc:100518131%09red/ssc:100038004%09red/ssc:397156%09red/ssc:1001…
Autoimmune thyroid disease	KEGG PATHWAY	ssc05320	6	51	0.144067	0.765833	ENSSSCG00000011877|ENSSSCG00000015652|ENSSSCG00000001341|ENSSSCG00000001453|ENSSSCG00000021504|ENSSSCG00000024161	ssc:397441|ssc:397106|ssc:100135031|ssc:100135040|ssc:100310806|ssc:396650|	397441|397106|100135031|100135040|100310806|396650|	CD86|IL10, CSIF, IL-10|SLA-2, SLA-B|SLA-DRA, SLA-DR-alpha, SLA-DRA1|IFN-ALPHAOMEGA|SLA-7|	http://www.genome.jp/kegg-bin/show_pathway?ssc05320/ssc:100135031%09red/ssc:397106%09red/ssc:100310806%09red/ssc:100135040%09red/ssc:397441%09red/ssc:396650%09red
Rheumatoid arthritis	KEGG PATHWAY	ssc05323	9	87	0.145538	0.765833	ENSSSCG00000017700|ENSSSCG00000011877|ENSSSCG00000008056|ENSSSCG00000017723|ENSSSCG00000001453|ENSSSCG00000009002|ENSSSCG00000007797|ENSSSCG00000009542|ENSSSCG00000012890	ssc:494459|ssc:397441|ssc:100518959|ssc:397422|ssc:100135040|ssc:396623|ssc:733681|ssc:100038026|ssc:100521769|	494459|397441|100518959|397422|100135040|396623|733681|100038026|100521769|	CCL3L1|CD86|ATP6V0C|CCL2, MCP-1|SLA-DRA, SLA-DR-alpha, SLA-DRA1|TLR2|ITGAL|TNFSF13B, BAFF|TCIRG1|	http://www.genome.jp/kegg-bin/show_pathway?ssc05323/ssc:100521769%09red/ssc:397422%09red/ssc:733681%09red/ssc:100038026%09red/ssc:494459%09red/ssc:396623%09red/ssc:100135040%09red/ssc:100518959%09red/ssc:397441%09red
Epstein-Barr virus infection	KEGG PATHWAY	ssc05169	17	189	0.147541	0.765833	ENSSSCG00000004154|ENSSSCG00000003395|ENSSSCG00000015652|ENSSSCG00000001341|ENSSSCG00000005711|ENSSSCG00000008742|ENSSSCG00000004895|ENSSSCG00000030408|ENSSSCG00000004110|ENSSSCG00000007797|ENSSSCG00000025181|ENSSSCG00000009761|ENSSSCG00000028278|ENSSSCG00000000068|ENSSSCG00000024161|ENSSSCG00000005965|ENSSSCG00000006250	ssc:100622156|ssc:100518131|ssc:397106|ssc:100135031|ssc:100155564|ssc:100511702|ssc:100738877|ssc:396723|ssc:100156182|ssc:733681|ssc:100523731|ssc:733643|ssc:100737040|ssc:100156226|ssc:396650|ssc:448810|ssc:100152890|	100622156|100518131|397106|100135031|100155564|100511702|100738877|396723|100156182|733681|100523731|733643|100737040|100156226|396650|448810|100152890|	TNFAIP3|PIK3CD|IL10, CSIF, IL-10|SLA-2, SLA-B|NUP214|CD38| |DDX58, RHIV-1, RIG-1, RIG-I, RLR-1|TAB2|ITGAL| | |POLR2A|EP300|SLA-7|MYC|LYN|	http://www.genome.jp/kegg-bin/show_pathway?ssc05169/ssc:448810%09red/ssc:100518131%09red/ssc:100152890%09red/ssc:396723%09red/ssc:100523731%09red/ssc:100155564%09red/ssc:100622156%09red/ssc:100156182%09red/ssc:733681%09red/ssc:100135031%09red/ssc:733643%09red/ssc:100511702%09red/ssc:100156226%09red/ssc:100737040%09red/ssc:100738877%09red/ssc:397106%09red/ssc:396650%09red
Hippo signaling pathway	KEGG PATHWAY	ssc04390	13	138	0.150656	0.765833	ENSSSCG00000016113|ENSSSCG00000010638|ENSSSCG00000016140|ENSSSCG00000002287|ENSSSCG00000014207|ENSSSCG00000011313|ENSSSCG00000011226|ENSSSCG00000012591|ENSSSCG00000009657|ENSSSCG00000024671|ENSSSCG00000011833|ENSSSCG00000005965|ENSSSCG00000004952	ssc:100127483|ssc:100153922|ssc:100519058|ssc:100152635|ssc:100517932|ssc:100738579|ssc:100038019|ssc:100158213|ssc:397090|ssc:100512949|ssc:100157729|ssc:448810|ssc:397260|	100127483|100153922|100519058|100152635|100517932|100738579|100038019|100158213|397090|100512949|100157729|448810|397260|	BMPR2|TCF7L2|FZD5|MPP5|APC, APC1|LIMD1| |AMOT|PPP2R2A|WNT9A|DLG1|MYC|SMAD3, MADH3|	http://www.genome.jp/kegg-bin/show_pathway?ssc04390/ssc:100127483%09red/ssc:448810%09red/ssc:100512949%09red/ssc:100152635%09red/ssc:100158213%09red/ssc:397090%09red/ssc:100157729%09red/ssc:100038019%09red/ssc:100153922%09red/ssc:397260%09red/ssc:100738579%09red/ssc:100519058%09red/ssc:100517932%09red
Ether lipid metabolism	KEGG PATHWAY	ssc00565	5	41	0.157999	0.786769	ENSSSCG00000002828|ENSSSCG00000028887|ENSSSCG00000024172|ENSSSCG00000003839|ENSSSCG00000003497	ssc:100517894|ssc:414900|ssc:100623755|ssc:100512419|ssc:100512662|	100517894|414900|100623755|100512419|100512662|	LPCAT2|PLD2|PAFAH2|PPAP2B|PLA2G2D|	http://www.genome.jp/kegg-bin/show_pathway?ssc00565/ssc:100512662%09red/ssc:100517894%09red/ssc:100623755%09red/ssc:100512419%09red/ssc:414900%09red
Systemic lupus erythematosus	KEGG PATHWAY	ssc05322	10	102	0.162323	0.787565	ENSSSCG00000011877|ENSSSCG00000001422|ENSSSCG00000015652|ENSSSCG00000001453|ENSSSCG00000026757|ENSSSCG00000000675|ENSSSCG00000021411|ENSSSCG00000006678|ENSSSCG00000017202|ENSSSCG00000014780	ssc:397441|ssc:448981|ssc:397106|ssc:100135040|ssc:100157327|ssc:445464|ssc:100157327|ssc:613130|ssc:396970|ssc:100302538|	397441|448981|397106|100135040|100157327|445464|100157327|613130|396970|100302538|	CD86|C2|IL10, CSIF, IL-10|SLA-DRA, SLA-DR-alpha, SLA-DRA1|HIST1H2BD|C1R|HIST1H2BD|FCGR1A|H3F3A|TRIM21|	http://www.genome.jp/kegg-bin/show_pathway?ssc05322/ssc:613130%09red/ssc:448981%09red/ssc:397106%09red/ssc:445464%09red/ssc:100302538%09red/ssc:100157327%09red/ssc:100135040%09red/ssc:396970%09red/ssc:397441%09red
Toxoplasmosis	KEGG PATHWAY	ssc05145	11	115	0.164614	0.787565	ENSSSCG00000030900|ENSSSCG00000003395|ENSSSCG00000015652|ENSSSCG00000028512|ENSSSCG00000024344|ENSSSCG00000004895|ENSSSCG00000027855|ENSSSCG00000004110|ENSSSCG00000001453|ENSSSCG00000009002|ENSSSCG00000016057	ssc:396801|ssc:100518131|ssc:397106|ssc:396801|ssc:414371|ssc:100738877|ssc:100307052|ssc:100156182|ssc:100135040|ssc:396623|ssc:396655|	396801|100518131|397106|396801|414371|100738877|100307052|100156182|100135040|396623|396655|	LDLR|PIK3CD|IL10, CSIF, IL-10|LDLR|CCR5| |SOCS1|TAB2|SLA-DRA, SLA-DR-alpha, SLA-DRA1|TLR2|STAT1|	http://www.genome.jp/kegg-bin/show_pathway?ssc05145/ssc:396801%09red/ssc:100518131%09red/ssc:100156182%09red/ssc:414371%09red/ssc:100307052%09red/ssc:397106%09red/ssc:100738877%09red/ssc:396623%09red/ssc:100135040%09red/ssc:396655%09red
Phosphatidylinositol signaling system	KEGG PATHWAY	ssc04070	8	79	0.176225	0.826904	ENSSSCG00000003395|ENSSSCG00000030474|ENSSSCG00000027340|ENSSSCG00000016147|ENSSSCG00000010092|ENSSSCG00000000555|ENSSSCG00000012035|ENSSSCG00000016050	ssc:100518131|ssc:100516802|ssc:100623115|ssc:100521692|ssc:100157143|ssc:100155015|ssc:100525664|ssc:100514878|	100518131|100516802|100623115|100521692|100157143|100155015|100525664|100514878|	PIK3CD|PIP4K2C|PI4K2B|PIKFYVE|PI4KA|ITPR3|SYNJ1|INPP1|	http://www.genome.jp/kegg-bin/show_pathway?ssc04070/ssc:100514878%09red/ssc:100518131%09red/ssc:100525664%09red/ssc:100516802%09red/ssc:100157143%09red/ssc:100623115%09red/ssc:100521692%09red/ssc:100155015%09red
Intestinal immune network for IgA production	KEGG PATHWAY	ssc04672	5	44	0.189797	0.867322	ENSSSCG00000009542|ENSSSCG00000001453|ENSSSCG00000011877|ENSSSCG00000015652|ENSSSCG00000021815	ssc:100038026|ssc:100135040|ssc:397441|ssc:397106|ssc:733692|	100038026|100135040|397441|397106|733692|	TNFSF13B, BAFF|SLA-DRA, SLA-DR-alpha, SLA-DRA1|CD86|IL10, CSIF, IL-10|IL15RA|	http://www.genome.jp/kegg-bin/show_pathway?ssc04672/ssc:100135040%09red/ssc:100038026%09red/ssc:397441%09red/ssc:733692%09red/ssc:397106%09red
Fc gamma R-mediated phagocytosis	KEGG PATHWAY	ssc04666	8	81	0.191948	0.867322	ENSSSCG00000003395|ENSSSCG00000028108|ENSSSCG00000003839|ENSSSCG00000023610|ENSSSCG00000006851|ENSSSCG00000028887|ENSSSCG00000006678|ENSSSCG00000006250	ssc:100518131|ssc:100626125|ssc:100512419|ssc:100517207|ssc:100737105|ssc:414900|ssc:613130|ssc:100152890|	100518131|100626125|100512419|100517207|100737105|414900|613130|100152890|	PIK3CD|ASAP3|PPAP2B|MARCKS|VAV3|PLD2|FCGR1A|LYN|	http://www.genome.jp/kegg-bin/show_pathway?ssc04666/ssc:100518131%09red/ssc:100512419%09red/ssc:100517207%09red/ssc:100152890%09red/ssc:414900%09red/ssc:100737105%09red/ssc:613130%09red/ssc:100626125%09red
Melanogenesis	KEGG PATHWAY	ssc04916	9	95	0.202095	0.895775	ENSSSCG00000010638|ENSSSCG00000009123|ENSSSCG00000001050|ENSSSCG00000016140|ENSSSCG00000009477|ENSSSCG00000016520|ENSSSCG00000000068|ENSSSCG00000024671|ENSSSCG00000026969	ssc:100153922|ssc:397674|ssc:396915|ssc:100519058|ssc:414911|ssc:100520468|ssc:100156226|ssc:100512949|ssc:100518251|	100153922|397674|396915|100519058|414911|100520468|100156226|100512949|100518251|	TCF7L2|CAMK2D|EDN1, EDN, ET-1, ET1, PPET1|FZD5|EDNRB, ETB|CREB3L2|EP300|WNT9A|KRAS|	http://www.genome.jp/kegg-bin/show_pathway?ssc04916/ssc:100520468%09red/ssc:100518251%09red/ssc:100512949%09red/ssc:414911%09red/ssc:396915%09red/ssc:100153922%09red/ssc:100156226%09red/ssc:397674%09red/ssc:100519058%09red
TNF signaling pathway	KEGG PATHWAY	ssc04668	10	109	0.210151	0.895775	ENSSSCG00000004154|ENSSSCG00000003395|ENSSSCG00000001050|ENSSSCG00000017723|ENSSSCG00000004110|ENSSSCG00000012203|ENSSSCG00000016520|ENSSSCG00000006862|ENSSSCG00000008977|ENSSSCG00000026940	ssc:100622156|ssc:100518131|ssc:396915|ssc:397422|ssc:100156182|ssc:100517796|ssc:100520468|ssc:396925|ssc:494019|ssc:100154896|	100622156|100518131|396915|397422|100156182|100517796|100520468|396925|494019|100154896|	TNFAIP3|PIK3CD|EDN1, EDN, ET-1, ET1, PPET1|CCL2, MCP-1|TAB2|TAB3|CREB3L2|VCAM1|CXCL10|CASP10|	http://www.genome.jp/kegg-bin/show_pathway?ssc04668/ssc:100520468%09red/ssc:100518131%09red/ssc:100622156%09red/ssc:100154896%09red/ssc:396915%09red/ssc:494019%09red/ssc:100156182%09red/ssc:396925%09red/ssc:100517796%09red/ssc:397422%09red
Fat digestion and absorption	KEGG PATHWAY	ssc04975	4	34	0.211572	0.895775	ENSSSCG00000009759|ENSSSCG00000005423|ENSSSCG00000003839|ENSSSCG00000003497	ssc:397018|ssc:100519123|ssc:100512419|ssc:100512662|	397018|100519123|100512419|100512662|	SCARB1| |PPAP2B|PLA2G2D|	http://www.genome.jp/kegg-bin/show_pathway?ssc04975/ssc:100512662%09red/ssc:100512419%09red/ssc:100519123%09red/ssc:397018%09red
PI3K-Akt signaling pathway	KEGG PATHWAY	ssc04151	26	328	0.223319	0.895775	ENSSSCG00000024960|ENSSSCG00000004895|ENSSSCG00000009657|ENSSSCG00000004896|ENSSSCG00000015324|ENSSSCG00000021504|ENSSSCG00000012397|ENSSSCG00000016832|ENSSSCG00000005965|ENSSSCG00000014441|ENSSSCG00000010509|ENSSSCG00000009002|ENSSSCG00000022101|ENSSSCG00000006161|ENSSSCG00000005163|ENSSSCG00000021886|ENSSSCG00000003140|ENSSSCG00000009544|ENSSSCG00000003395|ENSSSCG00000000293|ENSSSCG00000027628|…	ssc:100515267|ssc:100738877|ssc:397090|ssc:100154633|ssc:100522202|ssc:100310806|ssc:397156|ssc:100271930|ssc:448810|ssc:100517086|ssc:100155165|ssc:396623|ssc:100049662|ssc:397253|ssc:445459|ssc:100517086|ssc:100302504|ssc:100515336|ssc:100518131|ssc:100155091|ssc:399522|ssc:397483|ssc:100520187|ssc:100520468|ssc:100518251|ssc:100038023|	100515267|100738877|397090|100154633|100522202|100310806|397156|100271930|448810|100517086|100155165|396623|100049662|397253|445459|100517086|100302504|100515336|100518131|100155091|399522|397483|100520187|100520468|100518251|100038023|	PDGFC| |PPP2R2A|PHLPP1|GNG11|IFN-ALPHAOMEGA|IL2RG|IL7R, CD127|MYC|CSF1R|PIK3AP1|TLR2|BRCA1|IL7, IL-7|IFNB1, IFN-beta, IFNb|CSF1R|FGF21|COL4A1|PIK3CD|ITGA5|IL6R, IL-6Ralpha|ITGA2, VLA-2| |CREB3L2|KRAS|RPS6|	http://www.genome.jp/kegg-bin/show_pathway?ssc04151/ssc:448810%09red/ssc:397090%09red/ssc:445459%09red/ssc:100515267%09red/ssc:100522202%09red/ssc:100302504%09red/ssc:100517086%09red/ssc:100271930%09red/ssc:100154633%09red/ssc:100738877%09red/ssc:396623%09red/ssc:100155091%09red/ssc:100049662%09red/ssc:100520468%09red/ssc:100518251%09red/ssc:100515336%09red/ssc:100310806%09red/ssc:100520187%09red…
Graft-versus-host disease	KEGG PATHWAY	ssc05332	4	35	0.225024	0.895775	ENSSSCG00000001453|ENSSSCG00000024161|ENSSSCG00000011877|ENSSSCG00000001341	ssc:100135040|ssc:396650|ssc:397441|ssc:100135031|	100135040|396650|397441|100135031|	SLA-DRA, SLA-DR-alpha, SLA-DRA1|SLA-7|CD86|SLA-2, SLA-B|	http://www.genome.jp/kegg-bin/show_pathway?ssc05332/ssc:100135040%09red/ssc:100135031%09red/ssc:397441%09red/ssc:396650%09red
Prostate cancer	KEGG PATHWAY	ssc05215	8	85	0.22503	0.895775	ENSSSCG00000010638|ENSSSCG00000003395|ENSSSCG00000024960|ENSSSCG00000004895|ENSSSCG00000008478|ENSSSCG00000016520|ENSSSCG00000000068|ENSSSCG00000026969	ssc:100153922|ssc:100518131|ssc:100515267|ssc:100738877|ssc:100520187|ssc:100520468|ssc:100156226|ssc:100518251|	100153922|100518131|100515267|100738877|100520187|100520468|100156226|100518251|	TCF7L2|PIK3CD|PDGFC| | |CREB3L2|EP300|KRAS|	http://www.genome.jp/kegg-bin/show_pathway?ssc05215/ssc:100520468%09red/ssc:100518131%09red/ssc:100518251%09red/ssc:100515267%09red/ssc:100156226%09red/ssc:100738877%09red/ssc:100520187%09red/ssc:100153922%09red
Proteoglycans in cancer	KEGG PATHWAY	ssc05205	16	192	0.229694	0.895775	ENSSSCG00000003395|ENSSSCG00000009123|ENSSSCG00000022080|ENSSSCG00000016140|ENSSSCG00000009002|ENSSSCG00000000293|ENSSSCG00000022486|ENSSSCG00000016887|ENSSSCG00000008478|ENSSSCG00000016809|ENSSSCG00000024671|ENSSSCG00000000555|ENSSSCG00000005965|ENSSSCG00000026969|ENSSSCG00000009237|ENSSSCG00000005209	ssc:100518131|ssc:397674|ssc:396849|ssc:100519058|ssc:396623|ssc:100155091|ssc:100621690|ssc:397483|ssc:100520187|ssc:100524961|ssc:100512949|ssc:100155015|ssc:448810|ssc:100518251|ssc:100271932|ssc:100038023|	100518131|397674|396849|100519058|396623|100155091|100621690|397483|100520187|100524961|100512949|100155015|448810|100518251|100271932|100038023|	PIK3CD|CAMK2D|RHOA|FZD5|TLR2|ITGA5|CBLB|ITGA2, VLA-2| |DROSHA|WNT9A|ITPR3|MYC|KRAS|HPSE|RPS6|	http://www.genome.jp/kegg-bin/show_pathway?ssc05205/ssc:448810%09red/ssc:100518251%09red/ssc:100512949%09red/ssc:396623%09red/ssc:100038023%09red/ssc:100271932%09red/ssc:397674%09red/ssc:100519058%09red/ssc:100524961%09red/ssc:100518131%09red/ssc:100621690%09red/ssc:100155091%09red/ssc:396849%09red/ssc:100520187%09red/ssc:397483%09red/ssc:100155015%09red
Pertussis	KEGG PATHWAY	ssc05133	7	73	0.232652	0.895775	ENSSSCG00000013181|ENSSSCG00000001422|ENSSSCG00000022080|ENSSSCG00000015652|ENSSSCG00000000293|ENSSSCG00000028711|ENSSSCG00000000675	ssc:100144304|ssc:448981|ssc:396849|ssc:397106|ssc:100155091|ssc:397319|ssc:445464|	100144304|448981|396849|397106|100155091|397319|445464|	SERPING1, C1-INH|C2|RHOA|IL10, CSIF, IL-10|ITGA5|CASP1|C1R|	http://www.genome.jp/kegg-bin/show_pathway?ssc05133/ssc:100144304%09red/ssc:448981%09red/ssc:397106%09red/ssc:445464%09red/ssc:397319%09red/ssc:396849%09red/ssc:100155091%09red
Glycosaminoglycan biosynthesis - heparan sulfate / heparin	KEGG PATHWAY	ssc00534	3	24	0.23658	0.895775	ENSSSCG00000006009|ENSSSCG00000009680|ENSSSCG00000013281	ssc:100157655|ssc:100152703|ssc:100522362|	100157655|100152703|100522362|	EXT1|EXTL3|EXT2|	http://www.genome.jp/kegg-bin/show_pathway?ssc00534/ssc:100157655%09red/ssc:100522362%09red/ssc:100152703%09red
Thyroid hormone signaling pathway	KEGG PATHWAY	ssc04919	10	113	0.23981	0.895775	ENSSSCG00000003395|ENSSSCG00000029102|ENSSSCG00000017414|ENSSSCG00000026635|ENSSSCG00000000068|ENSSSCG00000001880|ENSSSCG00000005965|ENSSSCG00000026969|ENSSSCG00000016057|ENSSSCG00000012396	ssc:100518131|ssc:100736580|ssc:100524215|ssc:397404|ssc:100156226|ssc:100621221|ssc:448810|ssc:100518251|ssc:396655|ssc:100157450|	100518131|100736580|100524215|397404|100156226|100621221|448810|100518251|396655|100157450|	PIK3CD|MED24|KAT2A|SLC2A1, GLUT1|EP300|SIN3A|MYC|KRAS|STAT1|MED12|	http://www.genome.jp/kegg-bin/show_pathway?ssc04919/ssc:448810%09red/ssc:100518251%09red/ssc:100736580%09red/ssc:100156226%09red/ssc:397404%09red/ssc:100518131%09red/ssc:396655%09red/ssc:100157450%09red/ssc:100621221%09red/ssc:100524215%09red
Folate biosynthesis	KEGG PATHWAY	ssc00790	2	13	0.240332	0.895775	ENSSSCG00000006227|ENSSSCG00000001596	ssc:100154232|ssc:100154835|	100154232|100154835|	GGH|MOCS1|	http://www.genome.jp/kegg-bin/show_pathway?ssc00790/ssc:100154232%09red/ssc:100154835%09red
Pancreatic secretion	KEGG PATHWAY	ssc04972	8	87	0.2423	0.895775	ENSSSCG00000028069|ENSSSCG00000022080|ENSSSCG00000027344|ENSSSCG00000008742|ENSSSCG00000003497|ENSSSCG00000006932|ENSSSCG00000000555|ENSSSCG00000013848	ssc:733701|ssc:396849|ssc:396875|ssc:100511702|ssc:100512662|ssc:100154624|ssc:100155015|ssc:100511006|	733701|396849|396875|100511702|100512662|100154624|100155015|100511006|	ATP2B4, PMCA4|RHOA|ATP2A2, ATP2, SERCA2|CD38|PLA2G2D|CLCA4|ITPR3|RAB8A|	http://www.genome.jp/kegg-bin/show_pathway?ssc04972/ssc:100155015%09red/ssc:100512662%09red/ssc:733701%09red/ssc:100511702%09red/ssc:100511006%09red/ssc:396875%09red/ssc:100154624%09red/ssc:396849%09red
Nicotinate and nicotinamide metabolism	KEGG PATHWAY	ssc00760	3	25	0.253655	0.896973	ENSSSCG00000022912|ENSSSCG00000008742|ENSSSCG00000015435	ssc:100623678|ssc:100511702|ssc:595123|	100623678|100511702|595123|	NT5C3A|CD38|NAMPT, PBEF1|	http://www.genome.jp/kegg-bin/show_pathway?ssc00760/ssc:595123%09red/ssc:100623678%09red/ssc:100511702%09red
Pancreatic cancer	KEGG PATHWAY	ssc05212	6	63	0.261359	0.896973	ENSSSCG00000003395|ENSSSCG00000011226|ENSSSCG00000005738|ENSSSCG00000026969|ENSSSCG00000016057|ENSSSCG00000004952	ssc:100518131|ssc:100038019|ssc:100513970|ssc:100518251|ssc:396655|ssc:397260|	100518131|100038019|100513970|100518251|396655|397260|	PIK3CD| |RALGDS|KRAS|STAT1|SMAD3, MADH3|	http://www.genome.jp/kegg-bin/show_pathway?ssc05212/ssc:100518131%09red/ssc:100518251%09red/ssc:100513970%09red/ssc:100038019%09red/ssc:397260%09red/ssc:396655%09red
Fc epsilon RI signaling pathway	KEGG PATHWAY	ssc04664	6	63	0.261359	0.896973	ENSSSCG00000003395|ENSSSCG00000017006|ENSSSCG00000006851|ENSSSCG00000008478|ENSSSCG00000026969|ENSSSCG00000006250	ssc:100518131|ssc:100511843|ssc:100737105|ssc:100520187|ssc:100518251|ssc:100152890|	100518131|100511843|100737105|100520187|100518251|100152890|	PIK3CD|LCP2|VAV3| |KRAS|LYN|	http://www.genome.jp/kegg-bin/show_pathway?ssc04664/ssc:100518131%09red/ssc:100518251%09red/ssc:100152890%09red/ssc:100737105%09red/ssc:100511843%09red/ssc:100520187%09red
Leishmaniasis	KEGG PATHWAY	ssc05140	6	63	0.261359	0.896973	ENSSSCG00000015652|ENSSSCG00000004110|ENSSSCG00000001453|ENSSSCG00000009002|ENSSSCG00000006678|ENSSSCG00000016057	ssc:397106|ssc:100156182|ssc:100135040|ssc:396623|ssc:613130|ssc:396655|	397106|100156182|100135040|396623|613130|396655|	IL10, CSIF, IL-10|TAB2|SLA-DRA, SLA-DR-alpha, SLA-DRA1|TLR2|FCGR1A|STAT1|	http://www.genome.jp/kegg-bin/show_pathway?ssc05140/ssc:100156182%09red/ssc:397106%09red/ssc:613130%09red/ssc:396623%09red/ssc:100135040%09red/ssc:396655%09red
Viral myocarditis	KEGG PATHWAY	ssc05416	6	63	0.261359	0.896973	ENSSSCG00000011877|ENSSSCG00000001341|ENSSSCG00000001453|ENSSSCG00000000769|ENSSSCG00000007797|ENSSSCG00000024161	ssc:397441|ssc:100135031|ssc:100135040|ssc:594852|ssc:733681|ssc:396650|	397441|100135031|100135040|594852|733681|396650|	CD86|SLA-2, SLA-B|SLA-DRA, SLA-DR-alpha, SLA-DRA1|BID|ITGAL|SLA-7|	http://www.genome.jp/kegg-bin/show_pathway?ssc05416/ssc:396650%09red/ssc:733681%09red/ssc:100135031%09red/ssc:100135040%09red/ssc:397441%09red/ssc:594852%09red
Regulation of actin cytoskeleton	KEGG PATHWAY	ssc04810	16	198	0.264681	0.896973	ENSSSCG00000003395|ENSSSCG00000024960|ENSSSCG00000003107|ENSSSCG00000022080|ENSSSCG00000030474|ENSSSCG00000000295|ENSSSCG00000000293|ENSSSCG00000006851|ENSSSCG00000016147|ENSSSCG00000016887|ENSSSCG00000008478|ENSSSCG00000003140|ENSSSCG00000007797|ENSSSCG00000014387|ENSSSCG00000026969|ENSSSCG00000014207	ssc:100518131|ssc:100515267|ssc:100514580|ssc:396849|ssc:100516802|ssc:100152671|ssc:100155091|ssc:100737105|ssc:100521692|ssc:397483|ssc:100520187|ssc:100302504|ssc:733681|ssc:100511072|ssc:100518251|ssc:100517932|	100518131|100515267|100514580|396849|100516802|100152671|100155091|100737105|100521692|397483|100520187|100302504|733681|100511072|100518251|100517932|	PIK3CD|PDGFC| |RHOA|PIP4K2C|NCKAP1L|ITGA5|VAV3|PIKFYVE|ITGA2, VLA-2| |FGF21|ITGAL|DIAPH1|KRAS|APC, APC1|	http://www.genome.jp/kegg-bin/show_pathway?ssc04810/ssc:100518131%09red/ssc:100518251%09red/ssc:100514580%09red/ssc:100516802%09red/ssc:733681%09red/ssc:100152671%09red/ssc:100302504%09red/ssc:100737105%09red/ssc:396849%09red/ssc:100515267%09red/ssc:100155091%09red/ssc:100511072%09red/ssc:100521692%09red/ssc:100520187%09red/ssc:397483%09red/ssc:100517932%09red
Glycosphingolipid biosynthesis - lacto and neolacto series	KEGG PATHWAY	ssc00601	3	26	0.270895	0.897314	ENSSSCG00000010998|ENSSSCG00000024393|ENSSSCG00000003141	ssc:100511655|ssc:397599|ssc:397138|	100511655|397599|397138|	B4GALT1|B3GNT5|FUT1|	http://www.genome.jp/kegg-bin/show_pathway?ssc00601/ssc:397599%09red/ssc:100511655%09red/ssc:397138%09red
Renal cell carcinoma	KEGG PATHWAY	ssc05211	6	64	0.272136	0.897314	ENSSSCG00000003395|ENSSSCG00000008443|ENSSSCG00000008478|ENSSSCG00000026635|ENSSSCG00000000068|ENSSSCG00000026969	ssc:100518131|ssc:100037272|ssc:100520187|ssc:397404|ssc:100156226|ssc:100518251|	100518131|100037272|100520187|397404|100156226|100518251|	PIK3CD|EPAS1, EPAS, EPAS-1| |SLC2A1, GLUT1|EP300|KRAS|	http://www.genome.jp/kegg-bin/show_pathway?ssc05211/ssc:100518131%09red/ssc:100518251%09red/ssc:100037272%09red/ssc:100156226%09red/ssc:397404%09red/ssc:100520187%09red
Apoptosis	KEGG PATHWAY	ssc04210	8	91	0.278059	0.904619	ENSSSCG00000003395|ENSSSCG00000004895|ENSSSCG00000000769|ENSSSCG00000020906|ENSSSCG00000009636|ENSSSCG00000010301|ENSSSCG00000011363|ENSSSCG00000026940	ssc:100518131|ssc:100738877|ssc:594852|ssc:406191|ssc:100154839|ssc:396603|ssc:397493|ssc:100154896|	100518131|100738877|594852|406191|100154839|396603|397493|100154896|	PIK3CD| |BID|TNFSF10, TRAIL| |PPP3CB|PRKAR2A|CASP10|	http://www.genome.jp/kegg-bin/show_pathway?ssc04210/ssc:100518131%09red/ssc:100154839%09red/ssc:100154896%09red/ssc:406191%09red/ssc:396603%09red/ssc:100738877%09red/ssc:594852%09red/ssc:397493%09red
Glycosphingolipid biosynthesis - globo series	KEGG PATHWAY	ssc00603	2	15	0.287819	0.92405	ENSSSCG00000005943|ENSSSCG00000003141	ssc:445537|ssc:397138|	445537|397138|	ST3GAL1, SIAT4A|FUT1|	http://www.genome.jp/kegg-bin/show_pathway?ssc00603/ssc:397138%09red/ssc:445537%09red
Chagas disease (American trypanosomiasis)	KEGG PATHWAY	ssc05142	9	108	0.309034	0.979276	ENSSSCG00000017700|ENSSSCG00000003395|ENSSSCG00000005163|ENSSSCG00000017723|ENSSSCG00000009657|ENSSSCG00000015652|ENSSSCG00000011226|ENSSSCG00000009002|ENSSSCG00000004952	ssc:494459|ssc:100518131|ssc:445459|ssc:397422|ssc:397090|ssc:397106|ssc:100038019|ssc:396623|ssc:397260|	494459|100518131|445459|397422|397090|397106|100038019|396623|397260|	CCL3L1|PIK3CD|IFNB1, IFN-beta, IFNb|CCL2, MCP-1|PPP2R2A|IL10, CSIF, IL-10| |TLR2|SMAD3, MADH3|	http://www.genome.jp/kegg-bin/show_pathway?ssc05142/ssc:100518131%09red/ssc:397090%09red/ssc:445459%09red/ssc:397106%09red/ssc:100038019%09red/ssc:397260%09red/ssc:494459%09red/ssc:396623%09red/ssc:397422%09red
Amyotrophic lateral sclerosis (ALS)	KEGG PATHWAY	ssc05014	5	55	0.320654	0.986164	ENSSSCG00000004895|ENSSSCG00000028711|ENSSSCG00000000769|ENSSSCG00000001509|ENSSSCG00000010301	ssc:100738877|ssc:397319|ssc:594852|ssc:100524813|ssc:396603|	100738877|397319|594852|100524813|396603|	|CASP1|BID|DAXX|PPP3CB|	http://www.genome.jp/kegg-bin/show_pathway?ssc05014/ssc:396603%09red/ssc:397319%09red/ssc:594852%09red/ssc:100738877%09red/ssc:100524813%09red
Type I diabetes mellitus	KEGG PATHWAY	ssc04940	4	42	0.323696	0.986164	ENSSSCG00000001453|ENSSSCG00000024161|ENSSSCG00000011877|ENSSSCG00000001341	ssc:100135040|ssc:396650|ssc:397441|ssc:100135031|	100135040|396650|397441|100135031|	SLA-DRA, SLA-DR-alpha, SLA-DRA1|SLA-7|CD86|SLA-2, SLA-B|	http://www.genome.jp/kegg-bin/show_pathway?ssc04940/ssc:100135040%09red/ssc:100135031%09red/ssc:397441%09red/ssc:396650%09red
Bile secretion	KEGG PATHWAY	ssc04976	6	69	0.327374	0.986164	ENSSSCG00000030900|ENSSSCG00000028512|ENSSSCG00000015390|ENSSSCG00000017561|ENSSSCG00000009759|ENSSSCG00000026635	ssc:396801|ssc:396801|ssc:396910|ssc:100513231|ssc:397018|ssc:397404|	396801|396801|396910|100513231|397018|397404|	LDLR|LDLR|ABCB1, MDR1, P-gp|ABCC3|SCARB1|SLC2A1, GLUT1|	http://www.genome.jp/kegg-bin/show_pathway?ssc04976/ssc:396801%09red/ssc:397018%09red/ssc:397404%09red/ssc:100513231%09red/ssc:396910%09red
Chronic myeloid leukemia	KEGG PATHWAY	ssc05220	6	69	0.327374	0.986164	ENSSSCG00000003395|ENSSSCG00000011226|ENSSSCG00000008478|ENSSSCG00000022486|ENSSSCG00000005965|ENSSSCG00000026969	ssc:100518131|ssc:100038019|ssc:100520187|ssc:100621690|ssc:448810|ssc:100518251|	100518131|100038019|100520187|100621690|448810|100518251|	PIK3CD| | |CBLB|MYC|KRAS|	http://www.genome.jp/kegg-bin/show_pathway?ssc05220/ssc:448810%09red/ssc:100518251%09red/ssc:100621690%09red/ssc:100038019%09red/ssc:100520187%09red/ssc:100518131%09red
Glycosaminoglycan biosynthesis - keratan sulfate	KEGG PATHWAY	ssc00533	2	17	0.334951	0.996683	ENSSSCG00000010998|ENSSSCG00000005943	ssc:100511655|ssc:445537|	100511655|445537|	B4GALT1|ST3GAL1, SIAT4A|	http://www.genome.jp/kegg-bin/show_pathway?ssc00533/ssc:100511655%09red/ssc:445537%09red
2-Oxocarboxylic acid metabolism	KEGG PATHWAY	ssc01210	2	18	0.358187	1	ENSSSCG00000023807|ENSSSCG00000001852	ssc:100628006|ssc:397603|	100628006|397603|	ACO1|IDH2|	http://www.genome.jp/kegg-bin/show_pathway?ssc01210/ssc:100628006%09red/ssc:397603%09red
Phenylalanine, tyrosine and tryptophan biosynthesis	KEGG PATHWAY	ssc00400	1	6	0.363511	1	ENSSSCG00000003192	ssc:100522257|	100522257|	IL4I1|	http://www.genome.jp/kegg-bin/show_pathway?ssc00400/ssc:100522257%09red
Pyrimidine metabolism	KEGG PATHWAY	ssc00240	8	101	0.372234	1	ENSSSCG00000012146|ENSSSCG00000008399|ENSSSCG00000025233|ENSSSCG00000022912|ENSSSCG00000022880|ENSSSCG00000025298|ENSSSCG00000028278|ENSSSCG00000008647	ssc:100520595|ssc:100642182|ssc:100642182|ssc:100623678|ssc:100642182|ssc:100626323|ssc:100737040|ssc:100623872|	100520595|100642182|100642182|100623678|100642182|100626323|100737040|100623872|	CTPS2|PNPT1|PNPT1|NT5C3A|PNPT1| |POLR2A|CMPK2|	http://www.genome.jp/kegg-bin/show_pathway?ssc00240/ssc:100737040%09red/ssc:100623872%09red/ssc:100642182%09red/ssc:100626323%09red/ssc:100520595%09red/ssc:100623678%09red
Complement and coagulation cascades	KEGG PATHWAY	ssc04610	6	73	0.372543	1	ENSSSCG00000013181|ENSSSCG00000006289|ENSSSCG00000001422|ENSSSCG00000008997|ENSSSCG00000023868|ENSSSCG00000000675	ssc:100144304|ssc:397217|ssc:448981|ssc:100514354|ssc:100625728|ssc:445464|	100144304|397217|448981|100514354|100625728|445464|	SERPING1, C1-INH|F5|C2|FGB|C3AR1|C1R|	http://www.genome.jp/kegg-bin/show_pathway?ssc04610/ssc:397217%09red/ssc:100625728%09red/ssc:100144304%09red/ssc:448981%09red/ssc:445464%09red/ssc:100514354%09red
Bacterial invasion of epithelial cells	KEGG PATHWAY	ssc05100	6	73	0.372543	1	ENSSSCG00000003395|ENSSSCG00000022080|ENSSSCG00000017666|ENSSSCG00000000293|ENSSSCG00000022486|ENSSSCG00000016656	ssc:100518131|ssc:396849|ssc:100271929|ssc:100155091|ssc:100621690|ssc:100522109|	100518131|396849|100271929|100155091|100621690|100522109|	PIK3CD|RHOA|CLTC|ITGA5|CBLB|ELMO1|	http://www.genome.jp/kegg-bin/show_pathway?ssc05100/ssc:100522109%09red/ssc:100518131%09red/ssc:100271929%09red/ssc:100621690%09red/ssc:396849%09red/ssc:100155091%09red
TGF-beta signaling pathway	KEGG PATHWAY	ssc04350	6	74	0.383886	1	ENSSSCG00000016113|ENSSSCG00000022080|ENSSSCG00000011226|ENSSSCG00000000068|ENSSSCG00000005965|ENSSSCG00000004952	ssc:100127483|ssc:396849|ssc:100038019|ssc:100156226|ssc:448810|ssc:397260|	100127483|396849|100038019|100156226|448810|397260|	BMPR2|RHOA| |EP300|MYC|SMAD3, MADH3|	http://www.genome.jp/kegg-bin/show_pathway?ssc04350/ssc:100127483%09red/ssc:448810%09red/ssc:100038019%09red/ssc:100156226%09red/ssc:397260%09red/ssc:396849%09red
Platelet activation	KEGG PATHWAY	ssc04611	10	132	0.395369	1	ENSSSCG00000003395|ENSSSCG00000030156|ENSSSCG00000022080|ENSSSCG00000017006|ENSSSCG00000008997|ENSSSCG00000003107|ENSSSCG00000016887|ENSSSCG00000005533|ENSSSCG00000000555|ENSSSCG00000006250	ssc:100518131|ssc:100514179|ssc:396849|ssc:100511843|ssc:100514354|ssc:100514580|ssc:397483|ssc:397541|ssc:100155015|ssc:100152890|	100518131|100514179|396849|100511843|100514354|100514580|397483|397541|100155015|100152890|	PIK3CD|APBB1IP|RHOA|LCP2|FGB| |ITGA2, VLA-2|PTGS1, COX-1|ITPR3|LYN|	http://www.genome.jp/kegg-bin/show_pathway?ssc04611/ssc:100518131%09red/ssc:100155015%09red/ssc:100152890%09red/ssc:100514580%09red/ssc:397541%09red/ssc:396849%09red/ssc:100511843%09red/ssc:100514179%09red/ssc:397483%09red/ssc:100514354%09red
Neurotrophin signaling pathway	KEGG PATHWAY	ssc04722	9	118	0.398254	1	ENSSSCG00000003395|ENSSSCG00000009123|ENSSSCG00000022080|ENSSSCG00000004895|ENSSSCG00000009833|ENSSSCG00000008478|ENSSSCG00000023926|ENSSSCG00000024096|ENSSSCG00000026969	ssc:100518131|ssc:397674|ssc:396849|ssc:100738877|ssc:100154922|ssc:100520187|ssc:100518835|ssc:100518835|ssc:100518251|	100518131|397674|396849|100738877|100154922|100520187|100518835|100518835|100518251|	PIK3CD|CAMK2D|RHOA| |SH2B3| |RIPK2|RIPK2|KRAS|	http://www.genome.jp/kegg-bin/show_pathway?ssc04722/ssc:100518131%09red/ssc:100518251%09red/ssc:100518835%09red/ssc:100738877%09red/ssc:100154922%09red/ssc:397674%09red/ssc:396849%09red/ssc:100520187%09red
HIF-1 signaling pathway	KEGG PATHWAY	ssc04066	8	104	0.401124	1	ENSSSCG00000003395|ENSSSCG00000009123|ENSSSCG00000001050|ENSSSCG00000004895|ENSSSCG00000027628|ENSSSCG00000026635|ENSSSCG00000000068|ENSSSCG00000005209	ssc:100518131|ssc:397674|ssc:396915|ssc:100738877|ssc:399522|ssc:397404|ssc:100156226|ssc:100038023|	100518131|397674|396915|100738877|399522|397404|100156226|100038023|	PIK3CD|CAMK2D|EDN1, EDN, ET-1, ET1, PPET1| |IL6R, IL-6Ralpha|SLC2A1, GLUT1|EP300|RPS6|	http://www.genome.jp/kegg-bin/show_pathway?ssc04066/ssc:100518131%09red/ssc:100038023%09red/ssc:396915%09red/ssc:100156226%09red/ssc:397404%09red/ssc:100738877%09red/ssc:397674%09red/ssc:399522%09red
Axon guidance	KEGG PATHWAY	ssc04360	9	119	0.407286	1	ENSSSCG00000022080|ENSSSCG00000006495|ENSSSCG00000026412|ENSSSCG00000029815|ENSSSCG00000015645|ENSSSCG00000026795|ENSSSCG00000010301|ENSSSCG00000024362|ENSSSCG00000026969	ssc:396849|ssc:100157147|ssc:100620331|ssc:100623414|ssc:100518625|ssc:100518625|ssc:396603|ssc:100620243|ssc:100518251|	396849|100157147|100620331|100623414|100518625|100518625|396603|100620243|100518251|	RHOA|SEMA4A|PLXNA3|SRGAP1|SRGAP2|SRGAP2|PPP3CB| |KRAS|	http://www.genome.jp/kegg-bin/show_pathway?ssc04360/ssc:100620331%09red/ssc:100518251%09red/ssc:396603%09red/ssc:100623414%09red/ssc:100157147%09red/ssc:396849%09red/ssc:100620243%09red/ssc:100518625%09red
African trypanosomiasis	KEGG PATHWAY	ssc05143	3	34	0.409904	1	ENSSSCG00000007007|ENSSSCG00000006862|ENSSSCG00000015652	ssc:100519877|ssc:396925|ssc:397106|	100519877|396925|397106|	IDO1, IDO|VCAM1|IL10, CSIF, IL-10|	http://www.genome.jp/kegg-bin/show_pathway?ssc05143/ssc:396925%09red/ssc:100519877%09red/ssc:397106%09red
Steroid biosynthesis	KEGG PATHWAY	ssc00100	2	21	0.425862	1	ENSSSCG00000028637|ENSSSCG00000028517	ssc:397055|ssc:100520925|	397055|100520925|	CYP27B1|SC5D|	http://www.genome.jp/kegg-bin/show_pathway?ssc00100/ssc:100520925%09red/ssc:397055%09red
Histidine metabolism	KEGG PATHWAY	ssc00340	2	22	0.447593	1	ENSSSCG00000004870|ENSSSCG00000006324	ssc:100158127|ssc:100153809|	100158127|100153809|	CNDP2|ALDH9A1|	http://www.genome.jp/kegg-bin/show_pathway?ssc00340/ssc:100153809%09red/ssc:100158127%09red
Ovarian steroidogenesis	KEGG PATHWAY	ssc04913	4	51	0.452906	1	ENSSSCG00000030900|ENSSSCG00000030456|ENSSSCG00000028512|ENSSSCG00000009759	ssc:396801|ssc:100625479|ssc:396801|ssc:397018|	396801|100625479|396801|397018|	LDLR| |LDLR|SCARB1|	http://www.genome.jp/kegg-bin/show_pathway?ssc04913/ssc:396801%09red/ssc:100625479%09red/ssc:397018%09red
MicroRNAs in cancer	KEGG PATHWAY	ssc05206	16	228	0.458271	1	ENSSSCG00000016113|ENSSSCG00000022080|ENSSSCG00000000293|ENSSSCG00000004895|ENSSSCG00000015390|ENSSSCG00000014207|ENSSSCG00000027855|ENSSSCG00000030456|ENSSSCG00000023610|ENSSSCG00000015246|ENSSSCG00000008478|ENSSSCG00000022101|ENSSSCG00000000068|ENSSSCG00000005965|ENSSSCG00000026969|ENSSSCG00000001516	ssc:100127483|ssc:396849|ssc:100155091|ssc:100738877|ssc:396910|ssc:100517932|ssc:100307052|ssc:100625479|ssc:100517207|ssc:100517843|ssc:100520187|ssc:100049662|ssc:100156226|ssc:448810|ssc:100518251|ssc:397543|	100127483|396849|100155091|100738877|396910|100517932|100307052|100625479|100517207|100517843|100520187|100049662|100156226|448810|100518251|397543|	BMPR2|RHOA|ITGA5| |ABCB1, MDR1, P-gp|APC, APC1|SOCS1| |MARCKS|ST14| |BRCA1|EP300|MYC|KRAS|BAK, Bak1|	http://www.genome.jp/kegg-bin/show_pathway?ssc05206/ssc:100127483%09red/ssc:448810%09red/ssc:100625479%09red/ssc:100518251%09red/ssc:100155091%09red/ssc:100049662%09red/ssc:100307052%09red/ssc:396910%09red/ssc:397543%09red/ssc:100156226%09red/ssc:100517843%09red/ssc:396849%09red/ssc:100517207%09red/ssc:100520187%09red/ssc:100738877%09red/ssc:100517932%09red
Basal cell carcinoma	KEGG PATHWAY	ssc05217	4	52	0.466883	1	ENSSSCG00000016140|ENSSSCG00000010638|ENSSSCG00000014207|ENSSSCG00000024671	ssc:100519058|ssc:100153922|ssc:100517932|ssc:100512949|	100519058|100153922|100517932|100512949|	FZD5|TCF7L2|APC, APC1|WNT9A|	http://www.genome.jp/kegg-bin/show_pathway?ssc05217/ssc:100512949%09red/ssc:100519058%09red/ssc:100517932%09red/ssc:100153922%09red
Prolactin signaling pathway	KEGG PATHWAY	ssc04917	5	67	0.471	1	ENSSSCG00000008478|ENSSSCG00000003395|ENSSSCG00000027855|ENSSSCG00000026969|ENSSSCG00000016057	ssc:100520187|ssc:100518131|ssc:100307052|ssc:100518251|ssc:396655|	100520187|100518131|100307052|100518251|396655|	|PIK3CD|SOCS1|KRAS|STAT1|	http://www.genome.jp/kegg-bin/show_pathway?ssc04917/ssc:100518131%09red/ssc:396655%09red/ssc:100520187%09red/ssc:100307052%09red/ssc:100518251%09red
Sulfur relay system	KEGG PATHWAY	ssc04122	1	9	0.475575	1	ENSSSCG00000001596	ssc:100154835|	100154835|	MOCS1|	http://www.genome.jp/kegg-bin/show_pathway?ssc04122/ssc:100154835%09red
Long-term potentiation	KEGG PATHWAY	ssc04720	5	68	0.483202	1	ENSSSCG00000000068|ENSSSCG00000010301|ENSSSCG00000026969|ENSSSCG00000009123|ENSSSCG00000000555	ssc:100156226|ssc:396603|ssc:100518251|ssc:397674|ssc:100155015|	100156226|396603|100518251|397674|100155015|	EP300|PPP3CB|KRAS|CAMK2D|ITPR3|	http://www.genome.jp/kegg-bin/show_pathway?ssc04720/ssc:100155015%09red/ssc:100156226%09red/ssc:396603%09red/ssc:397674%09red/ssc:100518251%09red
Wnt signaling pathway	KEGG PATHWAY	ssc04310	9	128	0.488052	1	ENSSSCG00000010638|ENSSSCG00000009123|ENSSSCG00000022080|ENSSSCG00000016140|ENSSSCG00000014207|ENSSSCG00000024671|ENSSSCG00000000068|ENSSSCG00000010301|ENSSSCG00000005965	ssc:100153922|ssc:397674|ssc:396849|ssc:100519058|ssc:100517932|ssc:100512949|ssc:100156226|ssc:396603|ssc:448810|	100153922|397674|396849|100519058|100517932|100512949|100156226|396603|448810|	TCF7L2|CAMK2D|RHOA|FZD5|APC, APC1|WNT9A|EP300|PPP3CB|MYC|	http://www.genome.jp/kegg-bin/show_pathway?ssc04310/ssc:448810%09red/ssc:100512949%09red/ssc:396603%09red/ssc:100153922%09red/ssc:100156226%09red/ssc:396849%09red/ssc:397674%09red/ssc:100519058%09red/ssc:100517932%09red
Asthma	KEGG PATHWAY	ssc05310	2	24	0.489614	1	ENSSSCG00000001453|ENSSSCG00000015652	ssc:100135040|ssc:397106|	100135040|397106|	SLA-DRA, SLA-DR-alpha, SLA-DRA1|IL10, CSIF, IL-10|	http://www.genome.jp/kegg-bin/show_pathway?ssc05310/ssc:100135040%09red/ssc:397106%09red
ErbB signaling pathway	KEGG PATHWAY	ssc04012	6	85	0.506767	1	ENSSSCG00000003395|ENSSSCG00000009123|ENSSSCG00000008478|ENSSSCG00000022486|ENSSSCG00000005965|ENSSSCG00000026969	ssc:100518131|ssc:397674|ssc:100520187|ssc:100621690|ssc:448810|ssc:100518251|	100518131|397674|100520187|100621690|448810|100518251|	PIK3CD|CAMK2D| |CBLB|MYC|KRAS|	http://www.genome.jp/kegg-bin/show_pathway?ssc04012/ssc:448810%09red/ssc:100518251%09red/ssc:100621690%09red/ssc:397674%09red/ssc:100520187%09red/ssc:100518131%09red
GnRH signaling pathway	KEGG PATHWAY	ssc04912	6	86	0.51756	1	ENSSSCG00000009123|ENSSSCG00000028887|ENSSSCG00000008478|ENSSSCG00000009664|ENSSSCG00000000555|ENSSSCG00000026969	ssc:397674|ssc:414900|ssc:100520187|ssc:100157507|ssc:100155015|ssc:100518251|	397674|414900|100520187|100157507|100155015|100518251|	CAMK2D|PLD2| |PTK2B|ITPR3|KRAS|	http://www.genome.jp/kegg-bin/show_pathway?ssc04912/ssc:100155015%09red/ssc:100518251%09red/ssc:414900%09red/ssc:100157507%09red/ssc:397674%09red/ssc:100520187%09red
Adherens junction	KEGG PATHWAY	ssc04520	5	71	0.519179	1	ENSSSCG00000000068|ENSSSCG00000010638|ENSSSCG00000022080|ENSSSCG00000011226|ENSSSCG00000004952	ssc:100156226|ssc:100153922|ssc:396849|ssc:100038019|ssc:397260|	100156226|100153922|396849|100038019|397260|	EP300|TCF7L2|RHOA| |SMAD3, MADH3|	http://www.genome.jp/kegg-bin/show_pathway?ssc04520/ssc:100156226%09red/ssc:397260%09red/ssc:396849%09red/ssc:100153922%09red/ssc:100038019%09red
Signaling pathways regulating pluripotency of stem cells	KEGG PATHWAY	ssc04550	9	132	0.523128	1	ENSSSCG00000016113|ENSSSCG00000003395|ENSSSCG00000016140|ENSSSCG00000014207|ENSSSCG00000002752|ENSSSCG00000024671|ENSSSCG00000005965|ENSSSCG00000026969|ENSSSCG00000004952	ssc:100127483|ssc:100518131|ssc:100519058|ssc:100517932|ssc:100519194|ssc:100512949|ssc:448810|ssc:100518251|ssc:397260|	100127483|100518131|100519058|100517932|100519194|100512949|448810|100518251|397260|	BMPR2|PIK3CD|FZD5|APC, APC1|ZFHX3|WNT9A|MYC|KRAS|SMAD3, MADH3|	http://www.genome.jp/kegg-bin/show_pathway?ssc04550/ssc:100127483%09red/ssc:100519194%09red/ssc:100512949%09red/ssc:100518251%09red/ssc:397260%09red/ssc:100518131%09red/ssc:448810%09red/ssc:100519058%09red/ssc:100517932%09red
Rap1 signaling pathway	KEGG PATHWAY	ssc04015	14	208	0.525557	1	ENSSSCG00000021446|ENSSSCG00000003395|ENSSSCG00000024960|ENSSSCG00000002332|ENSSSCG00000030156|ENSSSCG00000014441|ENSSSCG00000017006|ENSSSCG00000003140|ENSSSCG00000016855|ENSSSCG00000007797|ENSSSCG00000021886|ENSSSCG00000005738|ENSSSCG00000026969|ENSSSCG00000022080	ssc:100511786|ssc:100518131|ssc:100515267|ssc:100157762|ssc:100514179|ssc:100517086|ssc:100511843|ssc:100302504|ssc:100520112|ssc:733681|ssc:100517086|ssc:100513970|ssc:100518251|ssc:396849|	100511786|100518131|100515267|100157762|100514179|100517086|100511843|100302504|100520112|733681|100517086|100513970|100518251|396849|	RAPGEF4|PIK3CD|PDGFC|SIPA1L1|APBB1IP|CSF1R|LCP2|FGF21|FYB|ITGAL|CSF1R|RALGDS|KRAS|RHOA|	http://www.genome.jp/kegg-bin/show_pathway?ssc04015/ssc:100518131%09red/ssc:100518251%09red/ssc:100517086%09red/ssc:733681%09red/ssc:100513970%09red/ssc:100515267%09red/ssc:100511786%09red/ssc:396849%09red/ssc:100511843%09red/ssc:100514179%09red/ssc:100157762%09red/ssc:100302504%09red/ssc:100520112%09red
Collecting duct acid secretion	KEGG PATHWAY	ssc04966	2	26	0.529564	1	ENSSSCG00000012890|ENSSSCG00000008056	ssc:100521769|ssc:100518959|	100521769|100518959|	TCIRG1|ATP6V0C|	http://www.genome.jp/kegg-bin/show_pathway?ssc04966/ssc:100521769%09red/ssc:100518959%09red
FoxO signaling pathway	KEGG PATHWAY	ssc04068	9	133	0.531774	1	ENSSSCG00000003395|ENSSSCG00000015652|ENSSSCG00000016832|ENSSSCG00000011226|ENSSSCG00000008478|ENSSSCG00000020906|ENSSSCG00000000068|ENSSSCG00000026969|ENSSSCG00000004952	ssc:100518131|ssc:397106|ssc:100271930|ssc:100038019|ssc:100520187|ssc:406191|ssc:100156226|ssc:100518251|ssc:397260|	100518131|397106|100271930|100038019|100520187|406191|100156226|100518251|397260|	PIK3CD|IL10, CSIF, IL-10|IL7R, CD127| | |TNFSF10, TRAIL|EP300|KRAS|SMAD3, MADH3|	http://www.genome.jp/kegg-bin/show_pathway?ssc04068/ssc:100518131%09red/ssc:100518251%09red/ssc:100271930%09red/ssc:406191%09red/ssc:397106%09red/ssc:100038019%09red/ssc:100156226%09red/ssc:397260%09red/ssc:100520187%09red
Small cell lung cancer	KEGG PATHWAY	ssc05222	6	88	0.538861	1	ENSSSCG00000003395|ENSSSCG00000004895|ENSSSCG00000002282|ENSSSCG00000016887|ENSSSCG00000005965|ENSSSCG00000009544	ssc:100518131|ssc:100738877|ssc:100517170|ssc:397483|ssc:448810|ssc:100515336|	100518131|100738877|100517170|397483|448810|100515336|	PIK3CD| |MAX|ITGA2, VLA-2|MYC|COL4A1|	http://www.genome.jp/kegg-bin/show_pathway?ssc05222/ssc:448810%09red/ssc:100518131%09red/ssc:100515336%09red/ssc:100738877%09red/ssc:100517170%09red/ssc:397483%09red
p53 signaling pathway	KEGG PATHWAY	ssc04115	5	73	0.542559	1	ENSSSCG00000029438|ENSSSCG00000000769|ENSSSCG00000011357|ENSSSCG00000014966|ENSSSCG00000026454	ssc:100620966|ssc:594852|ssc:100154430|ssc:100526065|ssc:397278|	100620966|594852|100154430|100526065|397278|	SESN2|BID| |SESN3|PMAIP1, TN3|	http://www.genome.jp/kegg-bin/show_pathway?ssc04115/ssc:100154430%09red/ssc:397278%09red/ssc:100620966%09red/ssc:594852%09red/ssc:100526065%09red
Leukocyte transendothelial migration	KEGG PATHWAY	ssc04670	8	119	0.542788	1	ENSSSCG00000021446|ENSSSCG00000003395|ENSSSCG00000022080|ENSSSCG00000006851|ENSSSCG00000003107|ENSSSCG00000006862|ENSSSCG00000009664|ENSSSCG00000007797	ssc:100511786|ssc:100518131|ssc:396849|ssc:100737105|ssc:100514580|ssc:396925|ssc:100157507|ssc:733681|	100511786|100518131|396849|100737105|100514580|396925|100157507|733681|	RAPGEF4|PIK3CD|RHOA|VAV3| |VCAM1|PTK2B|ITGAL|	http://www.genome.jp/kegg-bin/show_pathway?ssc04670/ssc:100518131%09red/ssc:100514580%09red/ssc:733681%09red/ssc:100737105%09red/ssc:396925%09red/ssc:100511786%09red/ssc:396849%09red/ssc:100157507%09red
cGMP-PKG signaling pathway	KEGG PATHWAY	ssc04022	11	167	0.55961	1	ENSSSCG00000003395|ENSSSCG00000028069|ENSSSCG00000022080|ENSSSCG00000027344|ENSSSCG00000009477|ENSSSCG00000010806|ENSSSCG00000006788|ENSSSCG00000028771|ENSSSCG00000016520|ENSSSCG00000000555|ENSSSCG00000010301	ssc:100518131|ssc:733701|ssc:396849|ssc:396875|ssc:414911|ssc:733670|ssc:606753|ssc:100037273|ssc:100520468|ssc:100155015|ssc:396603|	100518131|733701|396849|396875|414911|733670|606753|100037273|100520468|100155015|396603|	PIK3CD|ATP2B4, PMCA4|RHOA|ATP2A2, ATP2, SERCA2|EDNRB, ETB|RGS2|ADORA3|MEF2A|CREB3L2|ITPR3|PPP3CB|	http://www.genome.jp/kegg-bin/show_pathway?ssc04022/ssc:100520468%09red/ssc:100518131%09red/ssc:100037273%09red/ssc:733670%09red/ssc:414911%09red/ssc:733701%09red/ssc:396603%09red/ssc:396849%09red/ssc:396875%09red/ssc:606753%09red/ssc:100155015%09red
Gap junction	KEGG PATHWAY	ssc04540	6	90	0.559746	1	ENSSSCG00000024960|ENSSSCG00000013545|ENSSSCG00000008478|ENSSSCG00000000773|ENSSSCG00000000555|ENSSSCG00000026969	ssc:100515267|ssc:100736584|ssc:100520187|ssc:100518253|ssc:100155015|ssc:100518251|	100515267|100736584|100520187|100518253|100155015|100518251|	PDGFC| | |TUBA8|ITPR3|KRAS|	http://www.genome.jp/kegg-bin/show_pathway?ssc04540/ssc:100155015%09red/ssc:100518251%09red/ssc:100518253%09red/ssc:100515267%09red/ssc:100736584%09red/ssc:100520187%09red
Synaptic vesicle cycle	KEGG PATHWAY	ssc04721	4	59	0.560406	1	ENSSSCG00000017666|ENSSSCG00000012890|ENSSSCG00000005617|ENSSSCG00000008056	ssc:100271929|ssc:100521769|ssc:100517927|ssc:100518959|	100271929|100521769|100517927|100518959|	CLTC|TCIRG1|STXBP1|ATP6V0C|	http://www.genome.jp/kegg-bin/show_pathway?ssc04721/ssc:100521769%09red/ssc:100518959%09red/ssc:100271929%09red/ssc:100517927%09red
beta-Alanine metabolism	KEGG PATHWAY	ssc00410	2	28	0.56733	1	ENSSSCG00000004870|ENSSSCG00000006324	ssc:100158127|ssc:100153809|	100158127|100153809|	CNDP2|ALDH9A1|	http://www.genome.jp/kegg-bin/show_pathway?ssc00410/ssc:100153809%09red/ssc:100158127%09red
Sphingolipid metabolism	KEGG PATHWAY	ssc00600	3	45	0.584208	1	ENSSSCG00000003839|ENSSSCG00000014627|ENSSSCG00000026955	ssc:100512419|ssc:100518980|ssc:100155321|	100512419|100518980|100155321|	PPAP2B|SMPD1|ACER2|	http://www.genome.jp/kegg-bin/show_pathway?ssc00600/ssc:100518980%09red/ssc:100155321%09red/ssc:100512419%09red
Fatty acid metabolism	KEGG PATHWAY	ssc01212	3	45	0.584208	1	ENSSSCG00000012880|ENSSSCG00000022758|ENSSSCG00000021567	ssc:399527|ssc:100312978|ssc:100517533|	399527|100312978|100517533|	CPT1A, CPT1, L-CPTI|PECR|PPT1|	http://www.genome.jp/kegg-bin/show_pathway?ssc01212/ssc:399527%09red/ssc:100517533%09red/ssc:100312978%09red
Glioma	KEGG PATHWAY	ssc05214	4	61	0.585452	1	ENSSSCG00000003395|ENSSSCG00000008478|ENSSSCG00000026969|ENSSSCG00000009123	ssc:100518131|ssc:100520187|ssc:100518251|ssc:397674|	100518131|100520187|100518251|397674|	PIK3CD| |KRAS|CAMK2D|	http://www.genome.jp/kegg-bin/show_pathway?ssc05214/ssc:100518131%09red/ssc:100518251%09red/ssc:100520187%09red/ssc:397674%09red
Citrate cycle (TCA cycle)	KEGG PATHWAY	ssc00020	2	30	0.602854	1	ENSSSCG00000023807|ENSSSCG00000001852	ssc:100628006|ssc:397603|	100628006|397603|	ACO1|IDH2|	http://www.genome.jp/kegg-bin/show_pathway?ssc00020/ssc:100628006%09red/ssc:397603%09red
Glycosphingolipid biosynthesis - ganglio series	KEGG PATHWAY	ssc00604	1	14	0.620265	1	ENSSSCG00000005943	ssc:445537|	445537|	ST3GAL1, SIAT4A|	http://www.genome.jp/kegg-bin/show_pathway?ssc00604/ssc:445537%09red
Ras signaling pathway	KEGG PATHWAY	ssc04014	14	223	0.625135	1	ENSSSCG00000003395|ENSSSCG00000005738|ENSSSCG00000022080|ENSSSCG00000014441|ENSSSCG00000015519|ENSSSCG00000015563|ENSSSCG00000028887|ENSSSCG00000024960|ENSSSCG00000008478|ENSSSCG00000015324|ENSSSCG00000003140|ENSSSCG00000021886|ENSSSCG00000003497|ENSSSCG00000026969	ssc:100518131|ssc:100513970|ssc:396849|ssc:100517086|ssc:100522392|ssc:100515847|ssc:414900|ssc:100515267|ssc:100520187|ssc:100522202|ssc:100302504|ssc:100517086|ssc:100512662|ssc:100518251|	100518131|100513970|396849|100517086|100522392|100515847|414900|100515267|100520187|100522202|100302504|100517086|100512662|100518251|	PIK3CD|RALGDS|RHOA|CSF1R|RASAL2|RGL1|PLD2|PDGFC| |GNG11|FGF21|CSF1R|PLA2G2D|KRAS|	http://www.genome.jp/kegg-bin/show_pathway?ssc04014/ssc:100518131%09red/ssc:100518251%09red/ssc:100515847%09red/ssc:100512662%09red/ssc:100517086%09red/ssc:100513970%09red/ssc:100515267%09red/ssc:414900%09red/ssc:100522202%09red/ssc:396849%09red/ssc:100520187%09red/ssc:100302504%09red/ssc:100522392%09red
Cholinergic synapse	KEGG PATHWAY	ssc04725	7	113	0.628902	1	ENSSSCG00000003395|ENSSSCG00000009123|ENSSSCG00000004895|ENSSSCG00000015324|ENSSSCG00000016520|ENSSSCG00000000555|ENSSSCG00000026969	ssc:100518131|ssc:397674|ssc:100738877|ssc:100522202|ssc:100520468|ssc:100155015|ssc:100518251|	100518131|397674|100738877|100522202|100520468|100155015|100518251|	PIK3CD|CAMK2D| |GNG11|CREB3L2|ITPR3|KRAS|	http://www.genome.jp/kegg-bin/show_pathway?ssc04725/ssc:100520468%09red/ssc:100518251%09red/ssc:100522202%09red/ssc:100738877%09red/ssc:397674%09red/ssc:100518131%09red/ssc:100155015%09red
Linoleic acid metabolism	KEGG PATHWAY	ssc00591	2	32	0.636124	1	ENSSSCG00000026798|ENSSSCG00000003497	ssc:403111|ssc:100512662|	403111|100512662|	CYP2C42|PLA2G2D|	http://www.genome.jp/kegg-bin/show_pathway?ssc00591/ssc:100512662%09red/ssc:403111%09red
Cell adhesion molecules (CAMs)	KEGG PATHWAY	ssc04514	9	146	0.637988	1	ENSSSCG00000011877|ENSSSCG00000001453|ENSSSCG00000003592|ENSSSCG00000001341|ENSSSCG00000005211|ENSSSCG00000007797|ENSSSCG00000006862|ENSSSCG00000024161|ENSSSCG00000026305	ssc:397441|ssc:100135040|ssc:100516859|ssc:100135031|ssc:574058|ssc:733681|ssc:396925|ssc:396650|ssc:574057|	397441|100135040|100516859|100135031|574058|733681|396925|396650|574057|	CD86|SLA-DRA, SLA-DR-alpha, SLA-DRA1|SDC3|SLA-2, SLA-B|CD274, PDL1|ITGAL|VCAM1|SLA-7|PDCD1LG2, PDL2|	http://www.genome.jp/kegg-bin/show_pathway?ssc04514/ssc:574057%09red/ssc:100135031%09red/ssc:733681%09red/ssc:574058%09red/ssc:100516859%09red/ssc:396925%09red/ssc:100135040%09red/ssc:397441%09red/ssc:396650%09red
Metabolism of xenobiotics by cytochrome P450	KEGG PATHWAY	ssc00980	3	49	0.638911	1	ENSSSCG00000030456|ENSSSCG00000006325|ENSSSCG00000003491	ssc:100625479|ssc:733607|ssc:100511331|	100625479|733607|100511331|	|MGST3|AKR7A2|	http://www.genome.jp/kegg-bin/show_pathway?ssc00980/ssc:100625479%09red/ssc:100511331%09red/ssc:733607%09red
ECM-receptor interaction	KEGG PATHWAY	ssc04512	5	82	0.640359	1	ENSSSCG00000022204|ENSSSCG00000000293|ENSSSCG00000016887|ENSSSCG00000011942|ENSSSCG00000009544	ssc:100623869|ssc:100155091|ssc:397483|ssc:397042|ssc:100515336|	100623869|100155091|397483|397042|100515336|	AGRN|ITGA5|ITGA2, VLA-2|CD47, CD47/IAP|COL4A1|	http://www.genome.jp/kegg-bin/show_pathway?ssc04512/ssc:100623869%09red/ssc:100515336%09red/ssc:397042%09red/ssc:397483%09red/ssc:100155091%09red
Glycerophospholipid metabolism	KEGG PATHWAY	ssc00564	5	83	0.650387	1	ENSSSCG00000010631|ENSSSCG00000002828|ENSSSCG00000028887|ENSSSCG00000003839|ENSSSCG00000003497	ssc:397629|ssc:100517894|ssc:414900|ssc:100512419|ssc:100512662|	397629|100517894|414900|100512419|100512662|	GPAT, Gpam|LPCAT2|PLD2|PPAP2B|PLA2G2D|	http://www.genome.jp/kegg-bin/show_pathway?ssc00564/ssc:100512662%09red/ssc:100517894%09red/ssc:397629%09red/ssc:100512419%09red/ssc:414900%09red
Glutathione metabolism	KEGG PATHWAY	ssc00480	3	50	0.651769	1	ENSSSCG00000006325|ENSSSCG00000001852|ENSSSCG00000001849	ssc:733607|ssc:397603|ssc:397520|	733607|397603|397520|	MGST3|IDH2|ANPEP, APN, PEPN|	http://www.genome.jp/kegg-bin/show_pathway?ssc00480/ssc:397603%09red/ssc:397520%09red/ssc:733607%09red
Arrhythmogenic right ventricular cardiomyopathy (ARVC)	KEGG PATHWAY	ssc05412	4	67	0.655341	1	ENSSSCG00000010638|ENSSSCG00000000293|ENSSSCG00000016887|ENSSSCG00000017428	ssc:100153922|ssc:100155091|ssc:397483|ssc:397592|	100153922|100155091|397483|397592|	TCF7L2|ITGA5|ITGA2, VLA-2|JUP|	http://www.genome.jp/kegg-bin/show_pathway?ssc05412/ssc:397592%09red/ssc:100155091%09red/ssc:397483%09red/ssc:100153922%09red
RNA transport	KEGG PATHWAY	ssc03013	9	149	0.660542	1	ENSSSCG00000014794|ENSSSCG00000024498|ENSSSCG00000005711|ENSSSCG00000013223|ENSSSCG00000026034|ENSSSCG00000006063|ENSSSCG00000005667|ENSSSCG00000017514|ENSSSCG00000012727	ssc:100522198|ssc:100627643|ssc:100155564|ssc:100513973|ssc:100153581|ssc:100153958|ssc:100153500|ssc:100518449|ssc:100155078|	100522198|100627643|100155564|100513973|100153581|100153958|100153500|100518449|100155078|	NUP98| |NUP214|NUP160|NUP153|PABPC1|NUP188|KPNB1|FMR1|	http://www.genome.jp/kegg-bin/show_pathway?ssc03013/ssc:100155564%09red/ssc:100153958%09red/ssc:100522198%09red/ssc:100627643%09red/ssc:100153500%09red/ssc:100513973%09red/ssc:100518449%09red/ssc:100153581%09red/ssc:100155078%09red
Insulin signaling pathway	KEGG PATHWAY	ssc04910	8	133	0.661393	1	ENSSSCG00000003395|ENSSSCG00000027855|ENSSSCG00000012157|ENSSSCG00000008478|ENSSSCG00000022486|ENSSSCG00000011363|ENSSSCG00000026969|ENSSSCG00000005209	ssc:100518131|ssc:100307052|ssc:100519810|ssc:100520187|ssc:100621690|ssc:397493|ssc:100518251|ssc:100038023|	100518131|100307052|100519810|100520187|100621690|397493|100518251|100038023|	PIK3CD|SOCS1|PHKA2| |CBLB|PRKAR2A|KRAS|RPS6|	http://www.genome.jp/kegg-bin/show_pathway?ssc04910/ssc:100518131%09red/ssc:100518251%09red/ssc:100038023%09red/ssc:100307052%09red/ssc:100519810%09red/ssc:100621690%09red/ssc:100520187%09red/ssc:397493%09red
Fanconi anemia pathway	KEGG PATHWAY	ssc03460	3	51	0.664296	1	ENSSSCG00000023095|ENSSSCG00000026362|ENSSSCG00000022101	ssc:100622097|ssc:100499567|ssc:100049662|	100622097|100499567|100049662|	|HES1|BRCA1|	http://www.genome.jp/kegg-bin/show_pathway?ssc03460/ssc:100622097%09red/ssc:100049662%09red/ssc:100499567%09red
Primary bile acid biosynthesis	KEGG PATHWAY	ssc00120	1	16	0.666273	1	ENSSSCG00000010449	ssc:100157868|	100157868|	CH25H|	http://www.genome.jp/kegg-bin/show_pathway?ssc00120/ssc:100157868%09red
RNA polymerase	KEGG PATHWAY	ssc03020	2	34	0.667167	1	ENSSSCG00000025298|ENSSSCG00000028278	ssc:100626323|ssc:100737040|	100626323|100737040|	|POLR2A|	http://www.genome.jp/kegg-bin/show_pathway?ssc03020/ssc:100737040%09red/ssc:100626323%09red
Ubiquitin mediated proteolysis	KEGG PATHWAY	ssc04120	8	134	0.669131	1	ENSSSCG00000023379|ENSSSCG00000027855|ENSSSCG00000012328|ENSSSCG00000011393|ENSSSCG00000021766|ENSSSCG00000022101|ENSSSCG00000022486|ENSSSCG00000001912	ssc:100514753|ssc:100307052|ssc:100517442|ssc:100512631|ssc:100517903|ssc:100049662|ssc:100621690|ssc:100157336|	100514753|100307052|100517442|100512631|100517903|100049662|100621690|100157336|	UBE2L6|SOCS1|HUWE1|UBA7|HERC3|BRCA1|CBLB|PML|	http://www.genome.jp/kegg-bin/show_pathway?ssc04120/ssc:100514753%09red/ssc:100517903%09red/ssc:100621690%09red/ssc:100049662%09red/ssc:100157336%09red/ssc:100307052%09red/ssc:100517442%09red/ssc:100512631%09red
Non-small cell lung cancer	KEGG PATHWAY	ssc05223	3	52	0.676491	1	ENSSSCG00000003395|ENSSSCG00000008478|ENSSSCG00000026969	ssc:100518131|ssc:100520187|ssc:100518251|	100518131|100520187|100518251|	PIK3CD| |KRAS|	http://www.genome.jp/kegg-bin/show_pathway?ssc05223/ssc:100518131%09red/ssc:100518251%09red/ssc:100520187%09red
Melanoma	KEGG PATHWAY	ssc05218	4	69	0.676792	1	ENSSSCG00000003395|ENSSSCG00000024960|ENSSSCG00000026969|ENSSSCG00000003140	ssc:100518131|ssc:100515267|ssc:100518251|ssc:100302504|	100518131|100515267|100518251|100302504|	PIK3CD|PDGFC|KRAS|FGF21|	http://www.genome.jp/kegg-bin/show_pathway?ssc05218/ssc:100518131%09red/ssc:100518251%09red/ssc:100302504%09red/ssc:100515267%09red
Insulin secretion	KEGG PATHWAY	ssc04911	5	86	0.679388	1	ENSSSCG00000021446|ENSSSCG00000026635|ENSSSCG00000009123|ENSSSCG00000016520|ENSSSCG00000000555	ssc:100511786|ssc:397404|ssc:397674|ssc:100520468|ssc:100155015|	100511786|397404|397674|100520468|100155015|	RAPGEF4|SLC2A1, GLUT1|CAMK2D|CREB3L2|ITPR3|	http://www.genome.jp/kegg-bin/show_pathway?ssc04911/ssc:100520468%09red/ssc:100155015%09red/ssc:397404%09red/ssc:100511786%09red/ssc:397674%09red
Bladder cancer	KEGG PATHWAY	ssc05219	2	35	0.681868	1	ENSSSCG00000005965|ENSSSCG00000026969	ssc:448810|ssc:100518251|	448810|100518251|	MYC|KRAS|	http://www.genome.jp/kegg-bin/show_pathway?ssc05219/ssc:448810%09red/ssc:100518251%09red
Biosynthesis of unsaturated fatty acids	KEGG PATHWAY	ssc01040	1	17	0.687144	1	ENSSSCG00000022758	ssc:100312978|	100312978|	PECR|	http://www.genome.jp/kegg-bin/show_pathway?ssc01040/ssc:100312978%09red
SNARE interactions in vesicular transport	KEGG PATHWAY	ssc04130	2	36	0.696032	1	ENSSSCG00000005386|ENSSSCG00000004125	ssc:100157063|ssc:100152253|	100157063|100152253|	STX17|STX11|	http://www.genome.jp/kegg-bin/show_pathway?ssc04130/ssc:100157063%09red/ssc:100152253%09red
Alanine, aspartate and glutamate metabolism	KEGG PATHWAY	ssc00250	2	36	0.696032	1	ENSSSCG00000003192|ENSSSCG00000008339	ssc:100522257|ssc:397209|	100522257|397209|	IL4I1|GFPT1, GFAT1|	http://www.genome.jp/kegg-bin/show_pathway?ssc00250/ssc:397209%09red/ssc:100522257%09red
Glycerolipid metabolism	KEGG PATHWAY	ssc00561	3	54	0.699891	1	ENSSSCG00000010631|ENSSSCG00000003839|ENSSSCG00000006324	ssc:397629|ssc:100512419|ssc:100153809|	397629|100512419|100153809|	GPAT, Gpam|PPAP2B|ALDH9A1|	http://www.genome.jp/kegg-bin/show_pathway?ssc00561/ssc:100153809%09red/ssc:397629%09red/ssc:100512419%09red
One carbon pool by folate	KEGG PATHWAY	ssc00670	1	18	0.70671	1	ENSSSCG00000000839	ssc:100151976|	100151976|	ALDH1L2|	http://www.genome.jp/kegg-bin/show_pathway?ssc00670/ssc:100151976%09red
Thyroid hormone synthesis	KEGG PATHWAY	ssc04918	4	72	0.707191	1	ENSSSCG00000021274|ENSSSCG00000000555|ENSSSCG00000006733|ENSSSCG00000016520	ssc:100156166|ssc:100155015|ssc:100156166|ssc:100520468|	100156166|100155015|100156166|100520468|	TTF2|ITPR3|TTF2|CREB3L2|	http://www.genome.jp/kegg-bin/show_pathway?ssc04918/ssc:100520468%09red/ssc:100155015%09red/ssc:100156166%09red
Arginine and proline metabolism	KEGG PATHWAY	ssc00330	3	55	0.711098	1	ENSSSCG00000012173|ENSSSCG00000004870|ENSSSCG00000006324	ssc:397645|ssc:100158127|ssc:100153809|	397645|100158127|100153809|	SAT1, SAT|CNDP2|ALDH9A1|	http://www.genome.jp/kegg-bin/show_pathway?ssc00330/ssc:100153809%09red/ssc:100158127%09red/ssc:397645%09red
Phenylalanine metabolism	KEGG PATHWAY	ssc00360	1	19	0.725053	1	ENSSSCG00000003192	ssc:100522257|	100522257|	IL4I1|	http://www.genome.jp/kegg-bin/show_pathway?ssc00360/ssc:100522257%09red
Glycosaminoglycan degradation	KEGG PATHWAY	ssc00531	1	19	0.725053	1	ENSSSCG00000009237	ssc:100271932|	100271932|	HPSE|	http://www.genome.jp/kegg-bin/show_pathway?ssc00531/ssc:100271932%09red
Terpenoid backbone biosynthesis	KEGG PATHWAY	ssc00900	1	19	0.725053	1	ENSSSCG00000002281	ssc:100512293|	100512293|	FNTB|	http://www.genome.jp/kegg-bin/show_pathway?ssc00900/ssc:100512293%09red
Focal adhesion	KEGG PATHWAY	ssc04510	11	194	0.74097	1	ENSSSCG00000003395|ENSSSCG00000024960|ENSSSCG00000022080|ENSSSCG00000004895|ENSSSCG00000000293|ENSSSCG00000006851|ENSSSCG00000003107|ENSSSCG00000016887|ENSSSCG00000008478|ENSSSCG00000014387|ENSSSCG00000009544	ssc:100518131|ssc:100515267|ssc:396849|ssc:100738877|ssc:100155091|ssc:100737105|ssc:100514580|ssc:397483|ssc:100520187|ssc:100511072|ssc:100515336|	100518131|100515267|396849|100738877|100155091|100737105|100514580|397483|100520187|100511072|100515336|	PIK3CD|PDGFC|RHOA| |ITGA5|VAV3| |ITGA2, VLA-2| |DIAPH1|COL4A1|	http://www.genome.jp/kegg-bin/show_pathway?ssc04510/ssc:100518131%09red/ssc:100514580%09red/ssc:100155091%09red/ssc:100515336%09red/ssc:100515267%09red/ssc:100737105%09red/ssc:100738877%09red/ssc:396849%09red/ssc:100511072%09red/ssc:100520187%09red/ssc:397483%09red
Oxytocin signaling pathway	KEGG PATHWAY	ssc04921	9	161	0.742113	1	ENSSSCG00000003395|ENSSSCG00000009123|ENSSSCG00000022080|ENSSSCG00000008742|ENSSSCG00000010806|ENSSSCG00000000555|ENSSSCG00000010301|ENSSSCG00000023762|ENSSSCG00000026969	ssc:100518131|ssc:397674|ssc:396849|ssc:100511702|ssc:733670|ssc:100155015|ssc:396603|ssc:100622032|ssc:100518251|	100518131|397674|396849|100511702|733670|100155015|396603|100622032|100518251|	PIK3CD|CAMK2D|RHOA|CD38|RGS2|ITPR3|PPP3CB| |KRAS|	http://www.genome.jp/kegg-bin/show_pathway?ssc04921/ssc:100518131%09red/ssc:100518251%09red/ssc:733670%09red/ssc:396603%09red/ssc:100511702%09red/ssc:396849%09red/ssc:397674%09red/ssc:100622032%09red/ssc:100155015%09red
Renin-angiotensin system	KEGG PATHWAY	ssc04614	1	20	0.74225	1	ENSSSCG00000001849	ssc:397520|	397520|	ANPEP, APN, PEPN|	http://www.genome.jp/kegg-bin/show_pathway?ssc04614/ssc:397520%09red
Fatty acid elongation	KEGG PATHWAY	ssc00062	1	20	0.74225	1	ENSSSCG00000021567	ssc:100517533|	100517533|	PPT1|	http://www.genome.jp/kegg-bin/show_pathway?ssc00062/ssc:100517533%09red
VEGF signaling pathway	KEGG PATHWAY	ssc04370	3	58	0.742778	1	ENSSSCG00000010301|ENSSSCG00000003395|ENSSSCG00000026969	ssc:396603|ssc:100518131|ssc:100518251|	396603|100518131|100518251|	PPP3CB|PIK3CD|KRAS|	http://www.genome.jp/kegg-bin/show_pathway?ssc04370/ssc:100518131%09red/ssc:100518251%09red/ssc:396603%09red
Protein processing in endoplasmic reticulum	KEGG PATHWAY	ssc04141	9	162	0.74826	1	ENSSSCG00000014304|ENSSSCG00000004700|ENSSSCG00000004895|ENSSSCG00000015106|ENSSSCG00000001494|ENSSSCG00000025181|ENSSSCG00000024692|ENSSSCG00000001516|ENSSSCG00000010148	ssc:100511986|ssc:100156204|ssc:100738877|ssc:100516870|ssc:100522554|ssc:100523731|ssc:100154945|ssc:397543|ssc:100154974|	100511986|100156204|100738877|100516870|100522554|100523731|100154945|397543|100154974|	SEC24A|PDIA3, grp-58| |HYOU1|BAG2| |RRBP1|BAK, Bak1|ERO1LB|	http://www.genome.jp/kegg-bin/show_pathway?ssc04141/ssc:100516870%09red/ssc:100154945%09red/ssc:100522554%09red/ssc:100523731%09red/ssc:100511986%09red/ssc:100154974%09red/ssc:397543%09red/ssc:100738877%09red/ssc:100156204%09red
Long-term depression	KEGG PATHWAY	ssc04730	3	59	0.752704	1	ENSSSCG00000000555|ENSSSCG00000026969|ENSSSCG00000006250	ssc:100155015|ssc:100518251|ssc:100152890|	100155015|100518251|100152890|	ITPR3|KRAS|LYN|	http://www.genome.jp/kegg-bin/show_pathway?ssc04730/ssc:100155015%09red/ssc:100518251%09red/ssc:100152890%09red
Glycosaminoglycan biosynthesis - chondroitin sulfate / dermatan sulfate	KEGG PATHWAY	ssc00532	1	21	0.758372	1	ENSSSCG00000004825	ssc:100520288|	100520288|	CHSY1|	http://www.genome.jp/kegg-bin/show_pathway?ssc00532/ssc:100520288%09red
Fatty acid degradation	KEGG PATHWAY	ssc00071	2	41	0.759177	1	ENSSSCG00000012880|ENSSSCG00000006324	ssc:399527|ssc:100153809|	399527|100153809|	CPT1A, CPT1, L-CPTI|ALDH9A1|	http://www.genome.jp/kegg-bin/show_pathway?ssc00071/ssc:399527%09red/ssc:100153809%09red
Aldosterone-regulated sodium reabsorption	KEGG PATHWAY	ssc04960	2	41	0.759177	1	ENSSSCG00000003395|ENSSSCG00000026969	ssc:100518131|ssc:100518251|	100518131|100518251|	PIK3CD|KRAS|	http://www.genome.jp/kegg-bin/show_pathway?ssc04960/ssc:100518131%09red/ssc:100518251%09red
Chemical carcinogenesis	KEGG PATHWAY	ssc05204	3	60	0.762319	1	ENSSSCG00000030456|ENSSSCG00000006325|ENSSSCG00000026798	ssc:100625479|ssc:733607|ssc:403111|	100625479|733607|403111|	|MGST3|CYP2C42|	http://www.genome.jp/kegg-bin/show_pathway?ssc05204/ssc:100625479%09red/ssc:733607%09red/ssc:403111%09red
mTOR signaling pathway	KEGG PATHWAY	ssc04150	3	60	0.762319	1	ENSSSCG00000016853|ENSSSCG00000003395|ENSSSCG00000005209	ssc:100519575|ssc:100518131|ssc:100038023|	100519575|100518131|100038023|	RICTOR|PIK3CD|RPS6|	http://www.genome.jp/kegg-bin/show_pathway?ssc04150/ssc:100518131%09red/ssc:100038023%09red/ssc:100519575%09red
Calcium signaling pathway	KEGG PATHWAY	ssc04020	10	182	0.766999	1	ENSSSCG00000028069|ENSSSCG00000009123|ENSSSCG00000000555|ENSSSCG00000027344|ENSSSCG00000008742|ENSSSCG00000012157|ENSSSCG00000009477|ENSSSCG00000009664|ENSSSCG00000023912|ENSSSCG00000010301	ssc:733701|ssc:397674|ssc:100155015|ssc:396875|ssc:100511702|ssc:100519810|ssc:414911|ssc:100157507|ssc:100521440|ssc:396603|	733701|397674|100155015|396875|100511702|100519810|414911|100157507|100521440|396603|	ATP2B4, PMCA4|CAMK2D|ITPR3|ATP2A2, ATP2, SERCA2|CD38|PHKA2|EDNRB, ETB|PTK2B| |PPP3CB|	http://www.genome.jp/kegg-bin/show_pathway?ssc04020/ssc:100155015%09red/ssc:414911%09red/ssc:733701%09red/ssc:396603%09red/ssc:100511702%09red/ssc:100519810%09red/ssc:396875%09red/ssc:100157507%09red/ssc:100521440%09red/ssc:397674%09red
Estrogen signaling pathway	KEGG PATHWAY	ssc04915	5	97	0.77148	1	ENSSSCG00000000555|ENSSSCG00000003395|ENSSSCG00000008478|ENSSSCG00000026969|ENSSSCG00000016520	ssc:100155015|ssc:100518131|ssc:100520187|ssc:100518251|ssc:100520468|	100155015|100518131|100520187|100518251|100520468|	ITPR3|PIK3CD| |KRAS|CREB3L2|	http://www.genome.jp/kegg-bin/show_pathway?ssc04915/ssc:100520468%09red/ssc:100518251%09red/ssc:100520187%09red/ssc:100518131%09red/ssc:100155015%09red
alpha-Linolenic acid metabolism	KEGG PATHWAY	ssc00592	1	22	0.773486	1	ENSSSCG00000003497	ssc:100512662|	100512662|	PLA2G2D|	http://www.genome.jp/kegg-bin/show_pathway?ssc00592/ssc:100512662%09red
Ascorbate and aldarate metabolism	KEGG PATHWAY	ssc00053	1	22	0.773486	1	ENSSSCG00000006324	ssc:100153809|	100153809|	ALDH9A1|	http://www.genome.jp/kegg-bin/show_pathway?ssc00053/ssc:100153809%09red
Vitamin digestion and absorption	KEGG PATHWAY	ssc04977	1	22	0.773486	1	ENSSSCG00000009759	ssc:397018|	397018|	SCARB1|	http://www.genome.jp/kegg-bin/show_pathway?ssc04977/ssc:397018%09red
Arachidonic acid metabolism	KEGG PATHWAY	ssc00590	3	62	0.780636	1	ENSSSCG00000005533|ENSSSCG00000026798|ENSSSCG00000003497	ssc:397541|ssc:403111|ssc:100512662|	397541|403111|100512662|	PTGS1, COX-1|CYP2C42|PLA2G2D|	http://www.genome.jp/kegg-bin/show_pathway?ssc00590/ssc:100512662%09red/ssc:397541%09red/ssc:403111%09red
Vasopressin-regulated water reabsorption	KEGG PATHWAY	ssc04962	2	43	0.781072	1	ENSSSCG00000002538|ENSSSCG00000016520	ssc:100037291|ssc:100520468|	100037291|100520468|	DYNC1H1|CREB3L2|	http://www.genome.jp/kegg-bin/show_pathway?ssc04962/ssc:100520468%09red/ssc:100037291%09red
Salmonella infection	KEGG PATHWAY	ssc05132	4	81	0.785711	1	ENSSSCG00000028711|ENSSSCG00000002538|ENSSSCG00000017700|ENSSSCG00000017698	ssc:397319|ssc:100037291|ssc:494459|ssc:396668|	397319|100037291|494459|396668|	CASP1|DYNC1H1|CCL3L1|CCL4, MIP-1BETA, MIP1b, SCY4A|	http://www.genome.jp/kegg-bin/show_pathway?ssc05132/ssc:396668%09red/ssc:397319%09red/ssc:494459%09red/ssc:100037291%09red
Glyoxylate and dicarboxylate metabolism	KEGG PATHWAY	ssc00630	1	23	0.787655	1	ENSSSCG00000023807	ssc:100628006|	100628006|	ACO1|	http://www.genome.jp/kegg-bin/show_pathway?ssc00630/ssc:100628006%09red
Maturity onset diabetes of the young	KEGG PATHWAY	ssc04950	1	23	0.787655	1	ENSSSCG00000026362	ssc:100499567|	100499567|	HES1|	http://www.genome.jp/kegg-bin/show_pathway?ssc04950/ssc:100499567%09red
Amphetamine addiction	KEGG PATHWAY	ssc05031	3	65	0.805913	1	ENSSSCG00000010301|ENSSSCG00000009123|ENSSSCG00000016520	ssc:396603|ssc:397674|ssc:100520468|	396603|397674|100520468|	PPP3CB|CAMK2D|CREB3L2|	http://www.genome.jp/kegg-bin/show_pathway?ssc05031/ssc:100520468%09red/ssc:397674%09red/ssc:396603%09red
Dopaminergic synapse	KEGG PATHWAY	ssc04728	6	120	0.806534	1	ENSSSCG00000009123|ENSSSCG00000009657|ENSSSCG00000015324|ENSSSCG00000016520|ENSSSCG00000000555|ENSSSCG00000010301	ssc:397674|ssc:397090|ssc:100522202|ssc:100520468|ssc:100155015|ssc:396603|	397674|397090|100522202|100520468|100155015|396603|	CAMK2D|PPP2R2A|GNG11|CREB3L2|ITPR3|PPP3CB|	http://www.genome.jp/kegg-bin/show_pathway?ssc04728/ssc:100520468%09red/ssc:100155015%09red/ssc:397090%09red/ssc:396603%09red/ssc:100522202%09red/ssc:397674%09red
Valine, leucine and isoleucine degradation	KEGG PATHWAY	ssc00280	2	46	0.810635	1	ENSSSCG00000003192|ENSSSCG00000006324	ssc:100522257|ssc:100153809|	100522257|100153809|	IL4I1|ALDH9A1|	http://www.genome.jp/kegg-bin/show_pathway?ssc00280/ssc:100153809%09red/ssc:100522257%09red
Protein export	KEGG PATHWAY	ssc03060	1	25	0.813391	1	ENSSSCG00000016650	ssc:100521052|	100521052|	IMMP2L|	http://www.genome.jp/kegg-bin/show_pathway?ssc03060/ssc:100521052%09red
Hedgehog signaling pathway	KEGG PATHWAY	ssc04340	2	47	0.819667	1	ENSSSCG00000029539|ENSSSCG00000024671	ssc:100155623|ssc:100512949|	100155623|100512949|	RAB23|WNT9A|	http://www.genome.jp/kegg-bin/show_pathway?ssc04340/ssc:100155623%09red/ssc:100512949%09red
Adrenergic signaling in cardiomyocytes	KEGG PATHWAY	ssc04261	7	141	0.82451	1	ENSSSCG00000021446|ENSSSCG00000003395|ENSSSCG00000028069|ENSSSCG00000009123|ENSSSCG00000004895|ENSSSCG00000009657|ENSSSCG00000016520	ssc:100511786|ssc:100518131|ssc:733701|ssc:397674|ssc:100738877|ssc:397090|ssc:100520468|	100511786|100518131|733701|397674|100738877|397090|100520468|	RAPGEF4|PIK3CD|ATP2B4, PMCA4|CAMK2D| |PPP2R2A|CREB3L2|	http://www.genome.jp/kegg-bin/show_pathway?ssc04261/ssc:100520468%09red/ssc:100518131%09red/ssc:397090%09red/ssc:733701%09red/ssc:100511786%09red/ssc:397674%09red/ssc:100738877%09red
Type II diabetes mellitus	KEGG PATHWAY	ssc04930	2	48	0.828311	1	ENSSSCG00000003395|ENSSSCG00000027855	ssc:100518131|ssc:100307052|	100518131|100307052|	PIK3CD|SOCS1|	http://www.genome.jp/kegg-bin/show_pathway?ssc04930/ssc:100518131%09red/ssc:100307052%09red
Alcoholism	KEGG PATHWAY	ssc05034	7	143	0.834672	1	ENSSSCG00000008478|ENSSSCG00000026757|ENSSSCG00000016520|ENSSSCG00000021411|ENSSSCG00000026969|ENSSSCG00000017202|ENSSSCG00000015324	ssc:100520187|ssc:100157327|ssc:100520468|ssc:100157327|ssc:100518251|ssc:396970|ssc:100522202|	100520187|100157327|100520468|100157327|100518251|396970|100522202|	|HIST1H2BD|CREB3L2|HIST1H2BD|KRAS|H3F3A|GNG11|	http://www.genome.jp/kegg-bin/show_pathway?ssc05034/ssc:100520468%09red/ssc:100518251%09red/ssc:100157327%09red/ssc:100522202%09red/ssc:396970%09red/ssc:100520187%09red
Amoebiasis	KEGG PATHWAY	ssc05146	5	107	0.83632	1	ENSSSCG00000009002|ENSSSCG00000015652|ENSSSCG00000003395|ENSSSCG00000001011|ENSSSCG00000009544	ssc:396623|ssc:397106|ssc:100518131|ssc:100155145|ssc:100515336|	396623|397106|100518131|100155145|100515336|	TLR2|IL10, CSIF, IL-10|PIK3CD|SERPINB1|COL4A1|	http://www.genome.jp/kegg-bin/show_pathway?ssc05146/ssc:100518131%09red/ssc:100515336%09red/ssc:397106%09red/ssc:100155145%09red/ssc:396623%09red
N-Glycan biosynthesis	KEGG PATHWAY	ssc00510	2	49	0.83658	1	ENSSSCG00000010998|ENSSSCG00000000086	ssc:100511655|ssc:100625969|	100511655|100625969|	B4GALT1|MGAT3|	http://www.genome.jp/kegg-bin/show_pathway?ssc00510/ssc:100511655%09red/ssc:100625969%09red
Amino sugar and nucleotide sugar metabolism	KEGG PATHWAY	ssc00520	2	49	0.83658	1	ENSSSCG00000008316|ENSSSCG00000008339	ssc:100523729|ssc:397209|	100523729|397209|	NAGK|GFPT1, GFAT1|	http://www.genome.jp/kegg-bin/show_pathway?ssc00520/ssc:397209%09red/ssc:100523729%09red
Galactose metabolism	KEGG PATHWAY	ssc00052	1	28	0.846271	1	ENSSSCG00000010998	ssc:100511655|	100511655|	B4GALT1|	http://www.genome.jp/kegg-bin/show_pathway?ssc00052/ssc:100511655%09red
Mucin type O-Glycan biosynthesis	KEGG PATHWAY	ssc00512	1	28	0.846271	1	ENSSSCG00000005943	ssc:445537|	445537|	ST3GAL1, SIAT4A|	http://www.genome.jp/kegg-bin/show_pathway?ssc00512/ssc:445537%09red
Homologous recombination	KEGG PATHWAY	ssc03440	1	28	0.846271	1	ENSSSCG00000006127	ssc:100153233|	100153233|	NBN|	http://www.genome.jp/kegg-bin/show_pathway?ssc03440/ssc:100153233%09red
Steroid hormone biosynthesis	KEGG PATHWAY	ssc00140	2	51	0.852045	1	ENSSSCG00000030456|ENSSSCG00000026798	ssc:100625479|ssc:403111|	100625479|403111|	|CYP2C42|	http://www.genome.jp/kegg-bin/show_pathway?ssc00140/ssc:100625479%09red/ssc:403111%09red
Purine metabolism	KEGG PATHWAY	ssc00230	9	183	0.854297	1	ENSSSCG00000001810|ENSSSCG00000008399|ENSSSCG00000004165|ENSSSCG00000025233|ENSSSCG00000022912|ENSSSCG00000001064|ENSSSCG00000022880|ENSSSCG00000025298|ENSSSCG00000028278	ssc:100514527|ssc:100642182|ssc:100037969|ssc:100642182|ssc:100623678|ssc:100154573|ssc:100642182|ssc:100626323|ssc:100737040|	100514527|100642182|100037969|100642182|100623678|100154573|100642182|100626323|100737040|	PDE8A|PNPT1| |PNPT1|NT5C3A|GMPR|PNPT1| |POLR2A|	http://www.genome.jp/kegg-bin/show_pathway?ssc00230/ssc:100737040%09red/ssc:100623678%09red/ssc:100154573%09red/ssc:100037969%09red/ssc:100642182%09red/ssc:100514527%09red/ssc:100626323%09red
Tight junction	KEGG PATHWAY	ssc04530	6	129	0.854772	1	ENSSSCG00000004199|ENSSSCG00000006508|ENSSSCG00000022080|ENSSSCG00000002287|ENSSSCG00000009657|ENSSSCG00000026969	ssc:100524836|ssc:100155920|ssc:396849|ssc:100152635|ssc:397090|ssc:100518251|	100524836|100155920|396849|100152635|397090|100518251|	EPB41L2|ASH1L|RHOA|MPP5|PPP2R2A|KRAS|	http://www.genome.jp/kegg-bin/show_pathway?ssc04530/ssc:100518251%09red/ssc:100152635%09red/ssc:100155920%09red/ssc:396849%09red/ssc:397090%09red/ssc:100524836%09red
Fructose and mannose metabolism	KEGG PATHWAY	ssc00051	1	29	0.855889	1	ENSSSCG00000024219	ssc:100154112|	100154112|	C5H12orf5|	http://www.genome.jp/kegg-bin/show_pathway?ssc00051/ssc:100154112%09red
Serotonergic synapse	KEGG PATHWAY	ssc04726	5	112	0.862613	1	ENSSSCG00000005533|ENSSSCG00000000555|ENSSSCG00000026969|ENSSSCG00000015324|ENSSSCG00000026798	ssc:397541|ssc:100155015|ssc:100518251|ssc:100522202|ssc:403111|	397541|100155015|100518251|100522202|403111|	PTGS1, COX-1|ITPR3|KRAS|GNG11|CYP2C42|	http://www.genome.jp/kegg-bin/show_pathway?ssc04726/ssc:100155015%09red/ssc:100518251%09red/ssc:100522202%09red/ssc:397541%09red/ssc:403111%09red
Other types of O-glycan biosynthesis	KEGG PATHWAY	ssc00514	1	30	0.864906	1	ENSSSCG00000010998	ssc:100511655|	100511655|	B4GALT1|	http://www.genome.jp/kegg-bin/show_pathway?ssc00514/ssc:100511655%09red
Retinol metabolism	KEGG PATHWAY	ssc00830	2	54	0.872748	1	ENSSSCG00000029042|ENSSSCG00000026798	ssc:100519223|ssc:403111|	100519223|403111|	|CYP2C42|	http://www.genome.jp/kegg-bin/show_pathway?ssc00830/ssc:100519223%09red/ssc:403111%09red
Salivary secretion	KEGG PATHWAY	ssc04970	3	75	0.873066	1	ENSSSCG00000008742|ENSSSCG00000000555|ENSSSCG00000028069	ssc:100511702|ssc:100155015|ssc:733701|	100511702|100155015|733701|	CD38|ITPR3|ATP2B4, PMCA4|	http://www.genome.jp/kegg-bin/show_pathway?ssc04970/ssc:100155015%09red/ssc:733701%09red/ssc:100511702%09red
Base excision repair	KEGG PATHWAY	ssc03410	1	32	0.881284	1	ENSSSCG00000023033	ssc:100620838|	100620838|	PARP3|	http://www.genome.jp/kegg-bin/show_pathway?ssc03410/ssc:100620838%09red
Taste transduction	KEGG PATHWAY	ssc04742	1	33	0.888714	1	ENSSSCG00000000555	ssc:100155015|	100155015|	ITPR3|	http://www.genome.jp/kegg-bin/show_pathway?ssc04742/ssc:100155015%09red
Tyrosine metabolism	KEGG PATHWAY	ssc00350	1	33	0.888714	1	ENSSSCG00000003192	ssc:100522257|	100522257|	IL4I1|	http://www.genome.jp/kegg-bin/show_pathway?ssc00350/ssc:100522257%09red
AMPK signaling pathway	KEGG PATHWAY	ssc04152	5	118	0.889389	1	ENSSSCG00000012880|ENSSSCG00000003395|ENSSSCG00000009657|ENSSSCG00000013848|ENSSSCG00000016520	ssc:399527|ssc:100518131|ssc:397090|ssc:100511006|ssc:100520468|	399527|100518131|397090|100511006|100520468|	CPT1A, CPT1, L-CPTI|PIK3CD|PPP2R2A|RAB8A|CREB3L2|	http://www.genome.jp/kegg-bin/show_pathway?ssc04152/ssc:100520468%09red/ssc:100518131%09red/ssc:399527%09red/ssc:100511006%09red/ssc:397090%09red
Peroxisome	KEGG PATHWAY	ssc04146	3	80	0.898213	1	ENSSSCG00000002362|ENSSSCG00000001852|ENSSSCG00000022758	ssc:100152503|ssc:397603|ssc:100312978|	100152503|397603|100312978|	|IDH2|PECR|	http://www.genome.jp/kegg-bin/show_pathway?ssc04146/ssc:100152503%09red/ssc:100312978%09red/ssc:397603%09red
DNA replication	KEGG PATHWAY	ssc03030	1	35	0.902207	1	ENSSSCG00000024385	ssc:100625239|	100625239|	RNASEH2B|	http://www.genome.jp/kegg-bin/show_pathway?ssc03030/ssc:100625239%09red
Ribosome biogenesis in eukaryotes	KEGG PATHWAY	ssc03008	3	83	0.911055	1	ENSSSCG00000016809|ENSSSCG00000004329|ENSSSCG00000004328	ssc:100524961|ssc:100525725|ssc:100525725|	100524961|100525725|100525725|	DROSHA|MDN1|MDN1|	http://www.genome.jp/kegg-bin/show_pathway?ssc03008/ssc:100524961%09red/ssc:100525725%09red
cAMP signaling pathway	KEGG PATHWAY	ssc04024	9	201	0.913763	1	ENSSSCG00000021446|ENSSSCG00000003395|ENSSSCG00000028069|ENSSSCG00000009123|ENSSSCG00000022080|ENSSSCG00000006851|ENSSSCG00000028887|ENSSSCG00000016520|ENSSSCG00000000068	ssc:100511786|ssc:100518131|ssc:733701|ssc:397674|ssc:396849|ssc:100737105|ssc:414900|ssc:100520468|ssc:100156226|	100511786|100518131|733701|397674|396849|100737105|414900|100520468|100156226|	RAPGEF4|PIK3CD|ATP2B4, PMCA4|CAMK2D|RHOA|VAV3|PLD2|CREB3L2|EP300|	http://www.genome.jp/kegg-bin/show_pathway?ssc04024/ssc:100520468%09red/ssc:100518131%09red/ssc:733701%09red/ssc:414900%09red/ssc:100737105%09red/ssc:100156226%09red/ssc:100511786%09red/ssc:396849%09red/ssc:397674%09red
Cysteine and methionine metabolism	KEGG PATHWAY	ssc00270	1	37	0.914065	1	ENSSSCG00000003192	ssc:100522257|	100522257|	IL4I1|	http://www.genome.jp/kegg-bin/show_pathway?ssc00270/ssc:100522257%09red
Pyruvate metabolism	KEGG PATHWAY	ssc00620	1	37	0.914065	1	ENSSSCG00000006324	ssc:100153809|	100153809|	ALDH9A1|	http://www.genome.jp/kegg-bin/show_pathway?ssc00620/ssc:100153809%09red
Regulation of autophagy	KEGG PATHWAY	ssc04140	1	38	0.919444	1	ENSSSCG00000021504	ssc:100310806|	100310806|	IFN-ALPHAOMEGA|	http://www.genome.jp/kegg-bin/show_pathway?ssc04140/ssc:100310806%09red
Biosynthesis of amino acids	KEGG PATHWAY	ssc01230	2	63	0.919872	1	ENSSSCG00000023807|ENSSSCG00000001852	ssc:100628006|ssc:397603|	100628006|397603|	ACO1|IDH2|	http://www.genome.jp/kegg-bin/show_pathway?ssc01230/ssc:100628006%09red/ssc:397603%09red
Legionellosis	KEGG PATHWAY	ssc05134	2	64	0.923951	1	ENSSSCG00000028711|ENSSSCG00000009002	ssc:397319|ssc:396623|	397319|396623|	CASP1|TLR2|	http://www.genome.jp/kegg-bin/show_pathway?ssc05134/ssc:397319%09red/ssc:396623%09red
Inflammatory mediator regulation of TRP channels	KEGG PATHWAY	ssc04750	4	110	0.931225	1	ENSSSCG00000000555|ENSSSCG00000003395|ENSSSCG00000009123|ENSSSCG00000026798	ssc:100155015|ssc:100518131|ssc:397674|ssc:403111|	100155015|100518131|397674|403111|	ITPR3|PIK3CD|CAMK2D|CYP2C42|	http://www.genome.jp/kegg-bin/show_pathway?ssc04750/ssc:100518131%09red/ssc:100155015%09red/ssc:403111%09red/ssc:397674%09red
Huntington's disease	KEGG PATHWAY	ssc05016	8	190	0.932678	1	ENSSSCG00000017666|ENSSSCG00000010795|ENSSSCG00000023522|ENSSSCG00000016520|ENSSSCG00000028278|ENSSSCG00000000068|ENSSSCG00000001880|ENSSSCG00000008697	ssc:100271929|ssc:100312976|ssc:100154530|ssc:100520468|ssc:100737040|ssc:100156226|ssc:100621221|ssc:397014|	100271929|100312976|100154530|100520468|100737040|100156226|100621221|397014|	CLTC|NDUFAB1| |CREB3L2|POLR2A|EP300|SIN3A|HDH|	http://www.genome.jp/kegg-bin/show_pathway?ssc05016/ssc:100520468%09red/ssc:100737040%09red/ssc:100312976%09red/ssc:100156226%09red/ssc:100271929%09red/ssc:397014%09red/ssc:100154530%09red/ssc:100621221%09red
Morphine addiction	KEGG PATHWAY	ssc05032	3	90	0.935484	1	ENSSSCG00000001810|ENSSSCG00000004165|ENSSSCG00000015324	ssc:100514527|ssc:100037969|ssc:100522202|	100514527|100037969|100522202|	PDE8A| |GNG11|	http://www.genome.jp/kegg-bin/show_pathway?ssc05032/ssc:100522202%09red/ssc:100037969%09red/ssc:100514527%09red
MAPK signaling pathway	KEGG PATHWAY	ssc04010	11	249	0.937771	1	ENSSSCG00000015850|ENSSSCG00000002282|ENSSSCG00000011226|ENSSSCG00000004110|ENSSSCG00000008478|ENSSSCG00000010831|ENSSSCG00000003140|ENSSSCG00000010301|ENSSSCG00000005965|ENSSSCG00000026969|ENSSSCG00000001509	ssc:100514374|ssc:100517170|ssc:100038019|ssc:100156182|ssc:100520187|ssc:100517416|ssc:100302504|ssc:396603|ssc:448810|ssc:100518251|ssc:100524813|	100514374|100517170|100038019|100156182|100520187|100517416|100302504|396603|448810|100518251|100524813|	DUSP4|MAX| |TAB2| |DUSP10|FGF21|PPP3CB|MYC|KRAS|DAXX|	http://www.genome.jp/kegg-bin/show_pathway?ssc04010/ssc:448810%09red/ssc:100518251%09red/ssc:100517416%09red/ssc:100156182%09red/ssc:100514374%09red/ssc:396603%09red/ssc:100038019%09red/ssc:100517170%09red/ssc:100520187%09red/ssc:100302504%09red/ssc:100524813%09red
Mineral absorption	KEGG PATHWAY	ssc04978	1	42	0.937798	1	ENSSSCG00000024509	ssc:503660|	503660|	SLC30A1, ZnT-1|	http://www.genome.jp/kegg-bin/show_pathway?ssc04978/ssc:503660%09red
Endocrine and other factor-regulated calcium reabsorption	KEGG PATHWAY	ssc04961	1	42	0.937798	1	ENSSSCG00000017666	ssc:100271929|	100271929|	CLTC|	http://www.genome.jp/kegg-bin/show_pathway?ssc04961/ssc:100271929%09red
Carbohydrate digestion and absorption	KEGG PATHWAY	ssc04973	1	42	0.937798	1	ENSSSCG00000003395	ssc:100518131|	100518131|	PIK3CD|	http://www.genome.jp/kegg-bin/show_pathway?ssc04973/ssc:100518131%09red
Alzheimer's disease	KEGG PATHWAY	ssc05010	7	175	0.941983	1	ENSSSCG00000027344|ENSSSCG00000000423|ENSSSCG00000010795|ENSSSCG00000023150|ENSSSCG00000000769|ENSSSCG00000010301|ENSSSCG00000000555	ssc:396875|ssc:100627964|ssc:100312976|ssc:100514839|ssc:594852|ssc:396603|ssc:100155015|	396875|100627964|100312976|100514839|594852|396603|100155015|	ATP2A2, ATP2, SERCA2|LRP1|NDUFAB1| |BID|PPP3CB|ITPR3|	http://www.genome.jp/kegg-bin/show_pathway?ssc05010/ssc:100155015%09red/ssc:100312976%09red/ssc:396603%09red/ssc:100627964%09red/ssc:396875%09red/ssc:594852%09red/ssc:100514839%09red
Cell cycle	KEGG PATHWAY	ssc04110	4	115	0.94437	1	ENSSSCG00000000068|ENSSSCG00000020870|ENSSSCG00000005965|ENSSSCG00000004952	ssc:100156226|ssc:100192446|ssc:448810|ssc:397260|	100156226|100192446|448810|397260|	EP300|DBF4|MYC|SMAD3, MADH3|	http://www.genome.jp/kegg-bin/show_pathway?ssc04110/ssc:448810%09red/ssc:100156226%09red/ssc:397260%09red/ssc:100192446%09red
Adipocytokine signaling pathway	KEGG PATHWAY	ssc04920	2	70	0.944589	1	ENSSSCG00000012880|ENSSSCG00000026635	ssc:399527|ssc:397404|	399527|397404|	CPT1A, CPT1, L-CPTI|SLC2A1, GLUT1|	http://www.genome.jp/kegg-bin/show_pathway?ssc04920/ssc:399527%09red/ssc:397404%09red
Vascular smooth muscle contraction	KEGG PATHWAY	ssc04270	4	117	0.948953	1	ENSSSCG00000000555|ENSSSCG00000003497|ENSSSCG00000022080|ENSSSCG00000006461	ssc:100155015|ssc:100512662|ssc:396849|ssc:100157291|	100155015|100512662|396849|100157291|	ITPR3|PLA2G2D|RHOA|ARHGEF11|	http://www.genome.jp/kegg-bin/show_pathway?ssc04270/ssc:100155015%09red/ssc:100512662%09red/ssc:396849%09red/ssc:100157291%09red
Cocaine addiction	KEGG PATHWAY	ssc05030	1	46	0.951973	1	ENSSSCG00000016520	ssc:100520468|	100520468|	CREB3L2|	http://www.genome.jp/kegg-bin/show_pathway?ssc05030/ssc:100520468%09red
Gastric acid secretion	KEGG PATHWAY	ssc04971	2	74	0.955256	1	ENSSSCG00000000555|ENSSSCG00000009123	ssc:100155015|ssc:397674|	100155015|397674|	ITPR3|CAMK2D|	http://www.genome.jp/kegg-bin/show_pathway?ssc04971/ssc:100155015%09red/ssc:397674%09red
Circadian entrainment	KEGG PATHWAY	ssc04713	3	98	0.955741	1	ENSSSCG00000000555|ENSSSCG00000015324|ENSSSCG00000009123	ssc:100155015|ssc:100522202|ssc:397674|	100155015|100522202|397674|	ITPR3|GNG11|CAMK2D|	http://www.genome.jp/kegg-bin/show_pathway?ssc04713/ssc:100155015%09red/ssc:100522202%09red/ssc:397674%09red
Drug metabolism - cytochrome P450	KEGG PATHWAY	ssc00982	1	49	0.960442	1	ENSSSCG00000006325	ssc:733607|	733607|	MGST3|	http://www.genome.jp/kegg-bin/show_pathway?ssc00982/ssc:733607%09red
Glutamatergic synapse	KEGG PATHWAY	ssc04724	4	123	0.960699	1	ENSSSCG00000000555|ENSSSCG00000010301|ENSSSCG00000015324|ENSSSCG00000028887	ssc:100155015|ssc:396603|ssc:100522202|ssc:414900|	100155015|396603|100522202|414900|	ITPR3|PPP3CB|GNG11|PLD2|	http://www.genome.jp/kegg-bin/show_pathway?ssc04724/ssc:100155015%09red/ssc:100522202%09red/ssc:396603%09red/ssc:414900%09red
Hypertrophic cardiomyopathy (HCM)	KEGG PATHWAY	ssc05410	2	78	0.963941	1	ENSSSCG00000016887|ENSSSCG00000000293	ssc:397483|ssc:100155091|	397483|100155091|	ITGA2, VLA-2|ITGA5|	http://www.genome.jp/kegg-bin/show_pathway?ssc05410/ssc:100155091%09red/ssc:397483%09red
Protein digestion and absorption	KEGG PATHWAY	ssc04974	2	80	0.967651	1	ENSSSCG00000014899|ENSSSCG00000009544	ssc:100515678|ssc:100515336|	100515678|100515336|	PRCP|COL4A1|	http://www.genome.jp/kegg-bin/show_pathway?ssc04974/ssc:100515336%09red/ssc:100515678%09red
Oocyte meiosis	KEGG PATHWAY	ssc04114	3	107	0.971353	1	ENSSSCG00000010301|ENSSSCG00000009123|ENSSSCG00000000555	ssc:396603|ssc:397674|ssc:100155015|	396603|397674|100155015|	PPP3CB|CAMK2D|ITPR3|	http://www.genome.jp/kegg-bin/show_pathway?ssc04114/ssc:100155015%09red/ssc:397674%09red/ssc:396603%09red
Glycolysis / Gluconeogenesis	KEGG PATHWAY	ssc00010	1	54	0.971371	1	ENSSSCG00000006324	ssc:100153809|	100153809|	ALDH9A1|	http://www.genome.jp/kegg-bin/show_pathway?ssc00010/ssc:100153809%09red
mRNA surveillance pathway	KEGG PATHWAY	ssc03015	2	84	0.973999	1	ENSSSCG00000006063|ENSSSCG00000009657	ssc:100153958|ssc:397090|	100153958|397090|	PABPC1|PPP2R2A|	http://www.genome.jp/kegg-bin/show_pathway?ssc03015/ssc:397090%09red/ssc:100153958%09red
Dilated cardiomyopathy	KEGG PATHWAY	ssc05414	2	84	0.973999	1	ENSSSCG00000016887|ENSSSCG00000000293	ssc:397483|ssc:100155091|	397483|100155091|	ITGA2, VLA-2|ITGA5|	http://www.genome.jp/kegg-bin/show_pathway?ssc05414/ssc:100155091%09red/ssc:397483%09red
Progesterone-mediated oocyte maturation	KEGG PATHWAY	ssc04914	2	85	0.975388	1	ENSSSCG00000003395|ENSSSCG00000026969	ssc:100518131|ssc:100518251|	100518131|100518251|	PIK3CD|KRAS|	http://www.genome.jp/kegg-bin/show_pathway?ssc04914/ssc:100518131%09red/ssc:100518251%09red
Oxidative phosphorylation	KEGG PATHWAY	ssc00190	4	134	0.975982	1	ENSSSCG00000012890|ENSSSCG00000008056|ENSSSCG00000010261|ENSSSCG00000010795	ssc:100521769|ssc:100518959|ssc:100155201|ssc:100312976|	100521769|100518959|100155201|100312976|	TCIRG1|ATP6V0C|PPA1|NDUFAB1|	http://www.genome.jp/kegg-bin/show_pathway?ssc00190/ssc:100521769%09red/ssc:100518959%09red/ssc:100312976%09red/ssc:100155201%09red
Retrograde endocannabinoid signaling	KEGG PATHWAY	ssc04723	2	95	0.985855	1	ENSSSCG00000000555|ENSSSCG00000015324	ssc:100155015|ssc:100522202|	100155015|100522202|	ITPR3|GNG11|	http://www.genome.jp/kegg-bin/show_pathway?ssc04723/ssc:100155015%09red/ssc:100522202%09red
Aminoacyl-tRNA biosynthesis	KEGG PATHWAY	ssc00970	1	68	0.988428	1	ENSSSCG00000002516	ssc:100515390|	100515390|	WARS|	http://www.genome.jp/kegg-bin/show_pathway?ssc00970/ssc:100515390%09red
PPAR signaling pathway	KEGG PATHWAY	ssc03320	1	68	0.988428	1	ENSSSCG00000012880	ssc:399527|	399527|	CPT1A, CPT1, L-CPTI|	http://www.genome.jp/kegg-bin/show_pathway?ssc03320/ssc:399527%09red
Carbon metabolism	KEGG PATHWAY	ssc01200	2	99	0.988693	1	ENSSSCG00000023807|ENSSSCG00000001852	ssc:100628006|ssc:397603|	100628006|397603|	ACO1|IDH2|	http://www.genome.jp/kegg-bin/show_pathway?ssc01200/ssc:100628006%09red/ssc:397603%09red
Spliceosome	KEGG PATHWAY	ssc03040	3	129	0.990501	1	ENSSSCG00000017817|ENSSSCG00000027224|ENSSSCG00000008127	ssc:100526074|ssc:100511501|ssc:100739577|	100526074|100511501|100739577|	PRPF8|PCBP1|SNRNP200|	http://www.genome.jp/kegg-bin/show_pathway?ssc03040/ssc:100739577%09red/ssc:100526074%09red/ssc:100511501%09red
Non-alcoholic fatty liver disease (NAFLD)	KEGG PATHWAY	ssc04932	4	160	0.992912	1	ENSSSCG00000003395|ENSSSCG00000000769|ENSSSCG00000027628|ENSSSCG00000010795	ssc:100518131|ssc:594852|ssc:399522|ssc:100312976|	100518131|594852|399522|100312976|	PIK3CD|BID|IL6R, IL-6Ralpha|NDUFAB1|	http://www.genome.jp/kegg-bin/show_pathway?ssc04932/ssc:100518131%09red/ssc:100312976%09red/ssc:594852%09red/ssc:399522%09red
Ribosome	KEGG PATHWAY	ssc03010	3	143	0.995408	1	ENSSSCG00000008882|ENSSSCG00000008990|ENSSSCG00000005209	ssc:100620094|ssc:100513028|ssc:100038023|	100620094|100513028|100038023|	RPL15| |RPS6|	http://www.genome.jp/kegg-bin/show_pathway?ssc03010/ssc:100620094%09red/ssc:100038023%09red/ssc:100513028%09red
GABAergic synapse	KEGG PATHWAY	ssc04727	1	85	0.99615	1	ENSSSCG00000015324	ssc:100522202|	100522202|	GNG11|	http://www.genome.jp/kegg-bin/show_pathway?ssc04727/ssc:100522202%09red
Parkinson's disease	KEGG PATHWAY	ssc05012	3	151	0.99699	1	ENSSSCG00000023379|ENSSSCG00000011393|ENSSSCG00000010795	ssc:100514753|ssc:100512631|ssc:100312976|	100514753|100512631|100312976|	UBE2L6|UBA7|NDUFAB1|	http://www.genome.jp/kegg-bin/show_pathway?ssc05012/ssc:100512631%09red/ssc:100312976%09red/ssc:100514753%09red
Metabolic pathways	KEGG PATHWAY	ssc01100	51	1166	0.999459	1	ENSSSCG00000012173|ENSSSCG00000008056|ENSSSCG00000024172|ENSSSCG00000004825|ENSSSCG00000008742|ENSSSCG00000027340|ENSSSCG00000003497|ENSSSCG00000010998|ENSSSCG00000003192|ENSSSCG00000028278|ENSSSCG00000012035|ENSSSCG00000008647|ENSSSCG00000028517|ENSSSCG00000005943|ENSSSCG00000006009|ENSSSCG00000001852|ENSSSCG00000002828|ENSSSCG00000015673|ENSSSCG00000025298|ENSSSCG00000014627|ENSSSCG00000010631|…	ssc:397645|ssc:100518959|ssc:100623755|ssc:100520288|ssc:100511702|ssc:100623115|ssc:100512662|ssc:100511655|ssc:100522257|ssc:100737040|ssc:100525664|ssc:100623872|ssc:100520925|ssc:445537|ssc:100157655|ssc:397603|ssc:100517894|ssc:100521160|ssc:100626323|ssc:100518980|ssc:397629|ssc:100155321|ssc:403111|ssc:100520595|ssc:100519223|ssc:100512419|ssc:397055|ssc:100153809|ssc:100157143|ssc:595123|…	397645|100518959|100623755|100520288|100511702|100623115|100512662|100511655|100522257|100737040|100525664|100623872|100520925|445537|100157655|397603|100517894|100521160|100626323|100518980|397629|100155321|403111|100520595|100519223|100512419|397055|100153809|100157143|595123|100628006|414900|100625969|100514878|100152703|100158127|397520|100312978|100517533|100522362|100623678|397148|100312976…	SAT1, SAT|ATP6V0C|PAFAH2|CHSY1|CD38|PI4K2B|PLA2G2D|B4GALT1|IL4I1|POLR2A|SYNJ1|CMPK2|SC5D|ST3GAL1, SIAT4A|EXT1|IDH2|LPCAT2|KYNU| |SMPD1|GPAT, Gpam|ACER2|CYP2C42|CTPS2| |PPAP2B|CYP27B1|ALDH9A1|PI4KA|NAMPT, PBEF1|ACO1|PLD2|MGAT3|INPP1|EXTL3|CNDP2|ANPEP, APN, PEPN|PECR|PPT1|EXT2|NT5C3A|KMO|NDUFAB1|GFPT1, GFAT1|B3GNT5|MOCS1|PTGS1, COX-1|IDO1, IDO|FUT1|TCIRG1|HPSE|	http://www.genome.jp/kegg-bin/show_pathway?ssc01100/ssc:100157655%09red/ssc:100521769%09red/ssc:100312976%09red/ssc:100512662%09red/ssc:100157143%09red/ssc:100312978%09red/ssc:397138%09red/ssc:414900%09red/ssc:100737040%09red/ssc:100517533%09red/ssc:397599%09red/ssc:100511655%09red/ssc:100521160%09red/ssc:100623872%09red/ssc:100512419%09red/ssc:100520925%09red/ssc:397209%09red/ssc:100271932%09red…
Neuroactive ligand-receptor interaction	KEGG PATHWAY	ssc04080	4	268	0.999974	1	ENSSSCG00000023868|ENSSSCG00000009477|ENSSSCG00000011712|ENSSSCG00000006788	ssc:100625728|ssc:414911|ssc:100524220|ssc:606753|	100625728|414911|100524220|606753|	C3AR1|EDNRB, ETB|P2RY14|ADORA3|	http://www.genome.jp/kegg-bin/show_pathway?ssc04080/ssc:606753%09red/ssc:100625728%09red/ssc:100524220%09red/ssc:414911%09red
Olfactory transduction	KEGG PATHWAY	ssc04740	3	810	1	1	ENSSSCG00000014781|ENSSSCG00000009123|ENSSSCG00000006932	ssc:100518798|ssc:397674|ssc:100154624|	100518798|397674|100154624|	|CAMK2D|CLCA4|	http://www.genome.jp/kegg-bin/show_pathway?ssc04740/ssc:100154624%09red/ssc:100518798%09red/ssc:397674%09red
--------------------
#Term	Database	ID	Input number	Background number	P-Value	Corrected P-Value	Input	KO	Entrez_ID	KO_name	Hyperlink
--------------------
#Term	Database	ID	Input number	Background number	P-Value	Corrected P-Value	Input	KO	Entrez_ID	KO_name	Hyperlink
--------------------

## Sheet: VR2332 DOWN
##Databases: KEGG PATHWAY
##Statistical test method: hypergeometric test / Fisher's exact test
##FDR correction method: Benjamini and Hochberg
#Term	Database	ID	Input number	Background number	P-Value	Corrected P-Value	Input	KO	Entrez_ID	KO_name	Hyperlink
Ribosome	KEGG PATHWAY	ssc03010	42	143	1.18622e-26	2.39616e-24	ENSSSCG00000013002|ENSSSCG00000029785|ENSSSCG00000029830|ENSSSCG00000020817|ENSSSCG00000011856|ENSSSCG00000006249|ENSSSCG00000025192|ENSSSCG00000027573|ENSSSCG00000014569|ENSSSCG00000002529|ENSSSCG00000003367|ENSSSCG00000012842|ENSSSCG00000017239|ENSSSCG00000011952|ENSSSCG00000009303|ENSSSCG00000009146|ENSSSCG00000009019|ENSSSCG00000003042|ENSSSCG00000006899|ENSSSCG00000005003|ENSSSCG00000027353|…	ssc:396977|ssc:100622613|ssc:100154456|ssc:414397|ssc:100514796|ssc:414395|ssc:100627537|ssc:396993|ssc:100517228|ssc:100037996|ssc:397047|ssc:100513643|ssc:100516393|ssc:100521642|ssc:100736809|ssc:100517840|ssc:414390|ssc:100518254|ssc:100135671|ssc:414391|ssc:100736789|ssc:100625001|ssc:100037996|ssc:100524194|ssc:100151914|ssc:396980|ssc:414420|ssc:100155444|ssc:414422|ssc:100626973|ssc:39760…	396977|100622613|100154456|414397|100514796|414395|100627537|396993|100517228|100037996|397047|100513643|100516393|100521642|100736809|100517840|414390|100518254|100135671|414391|100736789|100625001|100037996|100524194|100151914|396980|414420|100155444|414422|100626973|397607|397650|100157118|100516385|100520127|733671|100512647|414398|100628232|396638|100514637|100623805|	FAU|RPS9|RPL8|RPS16|RPL35A|RPS20|RPL9|RPL29, RPL29/HIP|RPL27A|RPS21|HBP15/L22, Rpl22|RPLP2|RPL38|RPL24|RPL21|RPL34|RPS3A|RPS19|RPL5|RPS29| |RPL17|RPS21|MRPL28|MRPL2|RPS18|RPS28|RPS10|RPL11|RPL37|RPS15|RPS12|MRPL14|RPS25| |RPS3|RPL36|RPL23|RPL13|RPS23|RPS27A| |	http://www.genome.jp/kegg-bin/show_pathway?ssc03010/ssc:414398%09red/ssc:100514637%09red/ssc:414397%09red/ssc:100736809%09red/ssc:414395%09red/ssc:414390%09red/ssc:414391%09red/ssc:100628232%09red/ssc:100623805%09red/ssc:100524194%09red/ssc:100736789%09red/ssc:397650%09red/ssc:100517228%09red/ssc:100135671%09red/ssc:396977%09red/ssc:100154456%09red/ssc:397047%09red/ssc:100155444%09red/ssc:396980%…
Metabolic pathways	KEGG PATHWAY	ssc01100	70	1166	6.53812e-09	6.6035e-07	ENSSSCG00000003903|ENSSSCG00000029070|ENSSSCG00000015973|ENSSSCG00000000133|ENSSSCG00000026349|ENSSSCG00000004244|ENSSSCG00000007524|ENSSSCG00000006070|ENSSSCG00000024673|ENSSSCG00000025104|ENSSSCG00000010437|ENSSSCG00000008902|ENSSSCG00000008961|ENSSSCG00000024162|ENSSSCG00000007748|ENSSSCG00000005379|ENSSSCG00000005277|ENSSSCG00000005373|ENSSSCG00000021472|ENSSSCG00000027073|ENSSSCG00000014371|…	ssc:100524873|ssc:100514845|ssc:100513629|ssc:100153230|ssc:100739347|ssc:396919|ssc:100134963|ssc:100037989|ssc:100142626|ssc:100512624|ssc:100156262|ssc:100522503|ssc:100525706|ssc:100623875|ssc:100316854|ssc:100512452|ssc:100157004|ssc:100155883|ssc:100623333|ssc:100620687|ssc:100520950|ssc:100154885|ssc:100514845|ssc:100152836|ssc:100520115|ssc:100152301|ssc:100523751|ssc:100521367|ssc:100736…	100524873|100514845|100513629|100153230|100739347|396919|100134963|100037989|100142626|100512624|100156262|100522503|100525706|100623875|100316854|100512452|100157004|100155883|100623333|100620687|100520950|100154885|100514845|100152836|100520115|100152301|100523751|100521367|100736957|100525083|100525912|100516161|100516938|100153052|100625146|100513895|100516042|100739619|100048952|100514931|10…	| |ATP5G3|TSTD1|ALDH3B1|MAN1A1, MAN1A|ATP5E|COX6C|NME1|ATP5H|PAPSS2|PPAT|MTHFD2L|IMPA2|PSPH|GALNT12|GCNT1|NANS|POLR2E| |NDUFA2|PIGP| |AGPAT6, TSARG7|NDUFS6|PMVK|NDUFB5|SPR|POLD4|NDUFB3|DHFR|NDUFS4| |SMS|GAMT|NDUFB2|PDHB|NDUFB1|PON1|AHCYL2|ST3GAL2|GPT|SEPHS1, SEPHS1_tv1|NDUFA7|ATP5I|ACAA1|PAICS|IMPAD1, IMPA3, gPAPP|XYLB|SAT2, SSAT2|PNP, NP|SMPD2|ACAA2|AMACR|C1GALT1|PLCD1|FUK|TPI1, TIM| |DGKB|B4GAL…	http://www.genome.jp/kegg-bin/show_pathway?ssc01100/ssc:100525858%09red/ssc:396919%09red/ssc:100157004%09red/ssc:100312959%09red/ssc:100524873%09red/ssc:100736957%09red/ssc:100514845%09red/ssc:100156209%09red/ssc:100525912%09red/ssc:100739619%09red/ssc:397654%09red/ssc:100316854%09red/ssc:100516938%09red/ssc:100525767%09red/ssc:100521281%09red/ssc:100048952%09red/ssc:100513895%09red/ssc:100524618…
Oxidative phosphorylation	KEGG PATHWAY	ssc00190	17	134	8.76132e-07	5.89929e-05	ENSSSCG00000003903|ENSSSCG00000015973|ENSSSCG00000003261|ENSSSCG00000011764|ENSSSCG00000023903|ENSSSCG00000014371|ENSSSCG00000002449|ENSSSCG00000025104|ENSSSCG00000007524|ENSSSCG00000006070|ENSSSCG00000004480|ENSSSCG00000017114|ENSSSCG00000016893|ENSSSCG00000013596|ENSSSCG00000013436|ENSSSCG00000016100|ENSSSCG00000016495	ssc:100524873|ssc:100513629|ssc:100520312|ssc:100523751|ssc:396950|ssc:100520950|ssc:100739619|ssc:100512624|ssc:100134963|ssc:100037989|ssc:100038000|ssc:100520115|ssc:100516161|ssc:100517634|ssc:100524239|ssc:100525083|ssc:100513895|	100524873|100513629|100520312|100523751|396950|100520950|100739619|100512624|100134963|100037989|100038000|100520115|100516161|100517634|100524239|100525083|100513895|	|ATP5G3|NDUFA3|NDUFB5|ATP5I|NDUFA2|NDUFB1|ATP5H|ATP5E|COX6C|COX7A2|NDUFS6|NDUFS4|NDUFA7| |NDUFB3|NDUFB2|	http://www.genome.jp/kegg-bin/show_pathway?ssc00190/ssc:100038000%09red/ssc:100037989%09red/ssc:100525083%09red/ssc:100134963%09red/ssc:100517634%09red/ssc:100524873%09red/ssc:100513629%09red/ssc:100520312%09red/ssc:100523751%09red/ssc:396950%09red/ssc:100524239%09red/ssc:100520950%09red/ssc:100520115%09red/ssc:100513895%09red/ssc:100512624%09red/ssc:100516161%09red/ssc:100739619%09red
Parkinson's disease	KEGG PATHWAY	ssc05012	17	151	3.8566e-06	0.000194758	ENSSSCG00000003903|ENSSSCG00000015973|ENSSSCG00000010128|ENSSSCG00000003261|ENSSSCG00000011764|ENSSSCG00000014371|ENSSSCG00000002449|ENSSSCG00000025104|ENSSSCG00000007524|ENSSSCG00000006070|ENSSSCG00000004480|ENSSSCG00000017114|ENSSSCG00000016893|ENSSSCG00000013596|ENSSSCG00000013436|ENSSSCG00000016100|ENSSSCG00000016495	ssc:100524873|ssc:100513629|ssc:100156312|ssc:100520312|ssc:100523751|ssc:100520950|ssc:100739619|ssc:100512624|ssc:100134963|ssc:100037989|ssc:100038000|ssc:100520115|ssc:100516161|ssc:100517634|ssc:100524239|ssc:100525083|ssc:100513895|	100524873|100513629|100156312|100520312|100523751|100520950|100739619|100512624|100134963|100037989|100038000|100520115|100516161|100517634|100524239|100525083|100513895|	|ATP5G3|SEPT5|NDUFA3|NDUFB5|NDUFA2|NDUFB1|ATP5H|ATP5E|COX6C|COX7A2|NDUFS6|NDUFS4|NDUFA7| |NDUFB3|NDUFB2|	http://www.genome.jp/kegg-bin/show_pathway?ssc05012/ssc:100038000%09red/ssc:100037989%09red/ssc:100525083%09red/ssc:100134963%09red/ssc:100517634%09red/ssc:100524873%09red/ssc:100513629%09red/ssc:100520312%09red/ssc:100523751%09red/ssc:100524239%09red/ssc:100156312%09red/ssc:100520950%09red/ssc:100520115%09red/ssc:100513895%09red/ssc:100512624%09red/ssc:100516161%09red/ssc:100739619%09red
Huntington's disease	KEGG PATHWAY	ssc05016	19	190	5.19578e-06	0.00020991	ENSSSCG00000003903|ENSSSCG00000015973|ENSSSCG00000014058|ENSSSCG00000003261|ENSSSCG00000016100|ENSSSCG00000011764|ENSSSCG00000003112|ENSSSCG00000014371|ENSSSCG00000002449|ENSSSCG00000025104|ENSSSCG00000007524|ENSSSCG00000006070|ENSSSCG00000004480|ENSSSCG00000017114|ENSSSCG00000016893|ENSSSCG00000013596|ENSSSCG00000013436|ENSSSCG00000021472|ENSSSCG00000016495	ssc:100524873|ssc:100513629|ssc:100525860|ssc:100520312|ssc:100525083|ssc:100523751|ssc:100517403|ssc:100520950|ssc:100739619|ssc:100512624|ssc:100134963|ssc:100037989|ssc:100038000|ssc:100520115|ssc:100516161|ssc:100517634|ssc:100524239|ssc:100623333|ssc:100513895|	100524873|100513629|100525860|100520312|100525083|100523751|100517403|100520950|100739619|100512624|100134963|100037989|100038000|100520115|100516161|100517634|100524239|100623333|100513895|	|ATP5G3|CLTB|NDUFA3|NDUFB3|NDUFB5|BBC3|NDUFA2|NDUFB1|ATP5H|ATP5E|COX6C|COX7A2|NDUFS6|NDUFS4|NDUFA7| |POLR2E|NDUFB2|	http://www.genome.jp/kegg-bin/show_pathway?ssc05016/ssc:100038000%09red/ssc:100517403%09red/ssc:100037989%09red/ssc:100525083%09red/ssc:100525860%09red/ssc:100517634%09red/ssc:100524873%09red/ssc:100513629%09red/ssc:100520312%09red/ssc:100134963%09red/ssc:100523751%09red/ssc:100524239%09red/ssc:100520950%09red/ssc:100520115%09red/ssc:100513895%09red/ssc:100512624%09red/ssc:100516161%09red/ssc:100…
Alzheimer's disease	KEGG PATHWAY	ssc05010	17	175	2.26976e-05	0.000764151	ENSSSCG00000003903|ENSSSCG00000015973|ENSSSCG00000003261|ENSSSCG00000013033|ENSSSCG00000011764|ENSSSCG00000014371|ENSSSCG00000002449|ENSSSCG00000025104|ENSSSCG00000007524|ENSSSCG00000006070|ENSSSCG00000004480|ENSSSCG00000017114|ENSSSCG00000016893|ENSSSCG00000013596|ENSSSCG00000013436|ENSSSCG00000016100|ENSSSCG00000016495	ssc:100524873|ssc:100513629|ssc:100520312|ssc:100521065|ssc:100523751|ssc:100520950|ssc:100739619|ssc:100512624|ssc:100134963|ssc:100037989|ssc:100038000|ssc:100520115|ssc:100516161|ssc:100517634|ssc:100524239|ssc:100525083|ssc:100513895|	100524873|100513629|100520312|100521065|100523751|100520950|100739619|100512624|100134963|100037989|100038000|100520115|100516161|100517634|100524239|100525083|100513895|	|ATP5G3|NDUFA3|BAD|NDUFB5|NDUFA2|NDUFB1|ATP5H|ATP5E|COX6C|COX7A2|NDUFS6|NDUFS4|NDUFA7| |NDUFB3|NDUFB2|	http://www.genome.jp/kegg-bin/show_pathway?ssc05010/ssc:100038000%09red/ssc:100037989%09red/ssc:100525083%09red/ssc:100134963%09red/ssc:100739619%09red/ssc:100517634%09red/ssc:100524873%09red/ssc:100513629%09red/ssc:100520312%09red/ssc:100523751%09red/ssc:100524239%09red/ssc:100520950%09red/ssc:100520115%09red/ssc:100513895%09red/ssc:100512624%09red/ssc:100516161%09red/ssc:100521065%09red
Non-alcoholic fatty liver disease (NAFLD)	KEGG PATHWAY	ssc04932	14	160	0.000319536	0.0092209	ENSSSCG00000003903|ENSSSCG00000003261|ENSSSCG00000011764|ENSSSCG00000014371|ENSSSCG00000002449|ENSSSCG00000006070|ENSSSCG00000004480|ENSSSCG00000017114|ENSSSCG00000016893|ENSSSCG00000013596|ENSSSCG00000013436|ENSSSCG00000016100|ENSSSCG00000013564|ENSSSCG00000016495	ssc:100524873|ssc:100520312|ssc:100523751|ssc:100520950|ssc:100739619|ssc:100037989|ssc:100038000|ssc:100520115|ssc:100516161|ssc:100517634|ssc:100524239|ssc:100525083|ssc:396755|ssc:100513895|	100524873|100520312|100523751|100520950|100739619|100037989|100038000|100520115|100516161|100517634|100524239|100525083|396755|100513895|	|NDUFA3|NDUFB5|NDUFA2|NDUFB1|COX6C|COX7A2|NDUFS6|NDUFS4|NDUFA7| |NDUFB3|INSR|NDUFB2|	http://www.genome.jp/kegg-bin/show_pathway?ssc04932/ssc:100038000%09red/ssc:100037989%09red/ssc:100525083%09red/ssc:100517634%09red/ssc:100524873%09red/ssc:100739619%09red/ssc:100520312%09red/ssc:100523751%09red/ssc:100524239%09red/ssc:100520950%09red/ssc:100520115%09red/ssc:100513895%09red/ssc:396755%09red/ssc:100516161%09red
Mucin type O-Glycan biosynthesis	KEGG PATHWAY	ssc00512	5	28	0.0018919	0.0477704	ENSSSCG00000005379|ENSSSCG00000009705|ENSSSCG00000025089|ENSSSCG00000015341|ENSSSCG00000005277	ssc:100512452|ssc:100158205|ssc:100627772|ssc:100525767|ssc:100157004|	100512452|100158205|100627772|100525767|100157004|	GALNT12|GALNT7|ST3GAL2|C1GALT1|GCNT1|	http://www.genome.jp/kegg-bin/show_pathway?ssc00512/ssc:100157004%09red/ssc:100512452%09red/ssc:100525767%09red/ssc:100627772%09red/ssc:100158205%09red
Sulfur metabolism	KEGG PATHWAY	ssc00920	4	17	0.00228574	0.0513022	ENSSSCG00000027672|ENSSSCG00000010437|ENSSSCG00000006242|ENSSSCG00000000133	ssc:100625272|ssc:100156262|ssc:100156925|ssc:100153230|	100625272|100156262|100156925|100153230|	SUOX|PAPSS2|IMPAD1, IMPA3, gPAPP|TSTD1|	http://www.genome.jp/kegg-bin/show_pathway?ssc00920/ssc:100156262%09red/ssc:100153230%09red/ssc:100156925%09red/ssc:100625272%09red
SNARE interactions in vesicular transport	KEGG PATHWAY	ssc04130	5	36	0.00499461	0.100891	ENSSSCG00000013752|ENSSSCG00000015539|ENSSSCG00000007768|ENSSSCG00000022820|ENSSSCG00000007516	ssc:100627609|ssc:100510921|ssc:100523599|ssc:100620246|ssc:100144526|	100627609|100510921|100523599|100620246|100144526|	STX10|STX6|STX4|VAMP8|STX16|	http://www.genome.jp/kegg-bin/show_pathway?ssc04130/ssc:100523599%09red/ssc:100144526%09red/ssc:100510921%09red/ssc:100627609%09red/ssc:100620246%09red
Base excision repair	KEGG PATHWAY	ssc03410	4	32	0.0163017	0.299358	ENSSSCG00000024221|ENSSSCG00000008039|ENSSSCG00000001882|ENSSSCG00000012916	ssc:100153912|ssc:100516255|ssc:100155341|ssc:100736957|	100153912|100516255|100155341|100736957|	SMUG1|NTHL1|NEIL1|POLD4|	http://www.genome.jp/kegg-bin/show_pathway?ssc03410/ssc:100153912%09red/ssc:100155341%09red/ssc:100736957%09red/ssc:100516255%09red
Cysteine and methionine metabolism	KEGG PATHWAY	ssc00270	4	37	0.0252014	0.391592	ENSSSCG00000013756|ENSSSCG00000016568|ENSSSCG00000012166|ENSSSCG00000000133	ssc:100525858|ssc:100514931|ssc:100153052|ssc:100153230|	100525858|100514931|100153052|100153230|	MRI1|AHCYL2|SMS|TSTD1|	http://www.genome.jp/kegg-bin/show_pathway?ssc00270/ssc:100153052%09red/ssc:100525858%09red/ssc:100514931%09red/ssc:100153230%09red
Pyruvate metabolism	KEGG PATHWAY	ssc00620	4	37	0.0252014	0.391592	ENSSSCG00000008003|ENSSSCG00000025881|ENSSSCG00000026100|ENSSSCG00000008012	ssc:100525741|ssc:100516042|ssc:100621710|ssc:100525741|	100525741|100516042|100621710|100525741|	HAGHL|PDHB| |HAGHL|	http://www.genome.jp/kegg-bin/show_pathway?ssc00620/ssc:100621710%09red/ssc:100516042%09red/ssc:100525741%09red
Alcoholism	KEGG PATHWAY	ssc05034	8	143	0.0559238	0.664831	ENSSSCG00000028092|ENSSSCG00000001177|ENSSSCG00000028829|ENSSSCG00000021399|ENSSSCG00000022049|ENSSSCG00000009815|ENSSSCG00000006163|ENSSSCG00000029773	ssc:100524008|ssc:100158117|ssc:100154511|ssc:100624086|ssc:100158117|ssc:100157312|ssc:397408|ssc:100158117|	100524008|100158117|100154511|100624086|100158117|100157312|397408|100158117|	| |HIST1H3E| | |CAMKK2|PKIA| |	http://www.genome.jp/kegg-bin/show_pathway?ssc05034/ssc:100157312%09red/ssc:100524008%09red/ssc:100158117%09red/ssc:100154511%09red/ssc:100624086%09red/ssc:397408%09red
Folate biosynthesis	KEGG PATHWAY	ssc00790	2	13	0.0619345	0.664831	ENSSSCG00000008309|ENSSSCG00000014125	ssc:100521367|ssc:100525912|	100521367|100525912|	SPR|DHFR|	http://www.genome.jp/kegg-bin/show_pathway?ssc00790/ssc:100525912%09red/ssc:100521367%09red
Cardiac muscle contraction	KEGG PATHWAY	ssc04260	5	73	0.0624078	0.664831	ENSSSCG00000006070|ENSSSCG00000004480|ENSSSCG00000013436|ENSSSCG00000004570|ENSSSCG00000003903	ssc:100037989|ssc:100038000|ssc:100524239|ssc:100037999|ssc:100524873|	100037989|100038000|100524239|100037999|100524873|	COX6C|COX7A2| |TPM1| |	http://www.genome.jp/kegg-bin/show_pathway?ssc04260/ssc:100038000%09red/ssc:100524239%09red/ssc:100037999%09red/ssc:100524873%09red/ssc:100037989%09red
Complement and coagulation cascades	KEGG PATHWAY	ssc04610	5	73	0.0624078	0.664831	ENSSSCG00000015662|ENSSSCG00000030658|ENSSSCG00000024791|ENSSSCG00000003526|ENSSSCG00000013418	ssc:100520761|ssc:100525254|ssc:397347|ssc:100518846|ssc:396877|	100520761|100525254|397347|100518846|396877|	|SERPINF2|CD59|C1QB|CFD, DF|	http://www.genome.jp/kegg-bin/show_pathway?ssc04610/ssc:100525254%09red/ssc:397347%09red/ssc:100518846%09red/ssc:100520761%09red/ssc:396877%09red
Glycosphingolipid biosynthesis - ganglio series	KEGG PATHWAY	ssc00604	2	14	0.0695352	0.664831	ENSSSCG00000025089|ENSSSCG00000000433	ssc:100627772|ssc:100516440|	100627772|100516440|	ST3GAL2|B4GALNT1|	http://www.genome.jp/kegg-bin/show_pathway?ssc00604/ssc:100627772%09red/ssc:100516440%09red
Pyrimidine metabolism	KEGG PATHWAY	ssc00240	6	101	0.0733351	0.664831	ENSSSCG00000002135|ENSSSCG00000030388|ENSSSCG00000024673|ENSSSCG00000017591|ENSSSCG00000012916|ENSSSCG00000021472	ssc:100157138|ssc:100625277|ssc:100142626|ssc:733683|ssc:100736957|ssc:100623333|	100157138|100625277|100142626|733683|100736957|100623333|	PNP, NP| |NME1|NME2|POLD4|POLR2E|	http://www.genome.jp/kegg-bin/show_pathway?ssc00240/ssc:100736957%09red/ssc:100625277%09red/ssc:733683%09red/ssc:100142626%09red/ssc:100157138%09red/ssc:100623333%09red
Systemic lupus erythematosus	KEGG PATHWAY	ssc05322	6	102	0.075953	0.664831	ENSSSCG00000001177|ENSSSCG00000028829|ENSSSCG00000021399|ENSSSCG00000022049|ENSSSCG00000003526|ENSSSCG00000029773	ssc:100158117|ssc:100154511|ssc:100624086|ssc:100158117|ssc:100518846|ssc:100158117|	100158117|100154511|100624086|100158117|100518846|100158117|	|HIST1H3E| | |C1QB| |	http://www.genome.jp/kegg-bin/show_pathway?ssc05322/ssc:100158117%09red/ssc:100624086%09red/ssc:100518846%09red/ssc:100154511%09red
Arginine and proline metabolism	KEGG PATHWAY	ssc00330	4	55	0.0776516	0.664831	ENSSSCG00000023142|ENSSSCG00000012166|ENSSSCG00000010734|ENSSSCG00000017952	ssc:100625146|ssc:100153052|ssc:100156865|ssc:100170117|	100625146|100153052|100156865|100170117|	GAMT|SMS|OAT|SAT2, SSAT2|	http://www.genome.jp/kegg-bin/show_pathway?ssc00330/ssc:100153052%09red/ssc:100625146%09red/ssc:100156865%09red/ssc:100170117%09red
Purine metabolism	KEGG PATHWAY	ssc00230	9	183	0.08183	0.664831	ENSSSCG00000012916|ENSSSCG00000002135|ENSSSCG00000010437|ENSSSCG00000024673|ENSSSCG00000017591|ENSSSCG00000029451|ENSSSCG00000008902|ENSSSCG00000008901|ENSSSCG00000021472	ssc:100736957|ssc:100157138|ssc:100156262|ssc:100142626|ssc:733683|ssc:100521662|ssc:100522503|ssc:100521281|ssc:100623333|	100736957|100157138|100156262|100142626|733683|100521662|100522503|100521281|100623333|	POLD4|PNP, NP|PAPSS2|NME1|NME2| |PPAT|PAICS|POLR2E|	http://www.genome.jp/kegg-bin/show_pathway?ssc00230/ssc:100156262%09red/ssc:100736957%09red/ssc:100157138%09red/ssc:733683%09red/ssc:100522503%09red/ssc:100142626%09red/ssc:100521662%09red/ssc:100521281%09red/ssc:100623333%09red
Peroxisome	KEGG PATHWAY	ssc04146	5	80	0.0833932	0.664831	ENSSSCG00000013569|ENSSSCG00000011250|ENSSSCG00000013030|ENSSSCG00000006535|ENSSSCG00000016822	ssc:100511182|ssc:100515577|ssc:397273|ssc:100152301|ssc:100512020|	100511182|100515577|397273|100152301|100512020|	PEX11G|ACAA1|PRDX5|PMVK|AMACR|	http://www.genome.jp/kegg-bin/show_pathway?ssc04146/ssc:100512020%09red/ssc:100511182%09red/ssc:397273%09red/ssc:100515577%09red/ssc:100152301%09red
DNA replication	KEGG PATHWAY	ssc03030	3	35	0.0848449	0.664831	ENSSSCG00000012979|ENSSSCG00000011624|ENSSSCG00000012916	ssc:100517142|ssc:100519111|ssc:100736957|	100517142|100519111|100736957|	RNASEH2C|MCM2, MCM7|POLD4|	http://www.genome.jp/kegg-bin/show_pathway?ssc03030/ssc:100736957%09red/ssc:100517142%09red/ssc:100519111%09red
Inositol phosphate metabolism	KEGG PATHWAY	ssc00562	4	57	0.0854223	0.664831	ENSSSCG00000000685|ENSSSCG00000024162|ENSSSCG00000006242|ENSSSCG00000027550	ssc:100157582|ssc:100623875|ssc:100156925|ssc:100627099|	100157582|100623875|100156925|100627099|	TPI1, TIM|IMPA2|IMPAD1, IMPA3, gPAPP|PLCD1|	http://www.genome.jp/kegg-bin/show_pathway?ssc00562/ssc:100627099%09red/ssc:100623875%09red/ssc:100157582%09red/ssc:100156925%09red
Selenocompound metabolism	KEGG PATHWAY	ssc00450	2	16	0.0855723	0.664831	ENSSSCG00000010437|ENSSSCG00000026582	ssc:100156262|ssc:100626870|	100156262|100626870|	PAPSS2|SEPHS1, SEPHS1_tv1|	http://www.genome.jp/kegg-bin/show_pathway?ssc00450/ssc:100156262%09red/ssc:100626870%09red
One carbon pool by folate	KEGG PATHWAY	ssc00670	2	18	0.102587	0.7675	ENSSSCG00000008961|ENSSSCG00000014125	ssc:100525706|ssc:100525912|	100525706|100525912|	MTHFD2L|DHFR|	http://www.genome.jp/kegg-bin/show_pathway?ssc00670/ssc:100525912%09red/ssc:100525706%09red
Phenylalanine metabolism	KEGG PATHWAY	ssc00360	2	19	0.111412	0.803761	ENSSSCG00000010067|ENSSSCG00000026349	ssc:397412|ssc:100739347|	397412|100739347|	MIF|ALDH3B1|	http://www.genome.jp/kegg-bin/show_pathway?ssc00360/ssc:100739347%09red/ssc:397412%09red
Fatty acid elongation	KEGG PATHWAY	ssc00062	2	20	0.120427	0.838834	ENSSSCG00000016933|ENSSSCG00000004510	ssc:100524592|ssc:100312959|	100524592|100312959|	ELOVL7|ACAA2|	http://www.genome.jp/kegg-bin/show_pathway?ssc00062/ssc:100312959%09red/ssc:100524592%09red
Colorectal cancer	KEGG PATHWAY	ssc05210	4	68	0.13433	0.904489	ENSSSCG00000013033|ENSSSCG00000023329|ENSSSCG00000024222|ENSSSCG00000002383	ssc:100521065|ssc:100579172|ssc:100337665|ssc:100144486|	100521065|100579172|100337665|100144486|	BAD|APC2|MLH1|FOS, c-fos|	http://www.genome.jp/kegg-bin/show_pathway?ssc05210/ssc:100579172%09red/ssc:100144486%09red/ssc:100521065%09red/ssc:100337665%09red
RNA degradation	KEGG PATHWAY	ssc03018	4	71	0.149297	0.948298	ENSSSCG00000008354|ENSSSCG00000028322|ENSSSCG00000002719|ENSSSCG00000005925	ssc:100515656|ssc:100048932|ssc:100737302|ssc:100511875|	100515656|100048932|100737302|100511875|	C1D|BTG2|EXOSC6|EXOSC4|	http://www.genome.jp/kegg-bin/show_pathway?ssc03018/ssc:100048932%09red/ssc:100515656%09red/ssc:100511875%09red/ssc:100737302%09red
Glycosaminoglycan biosynthesis - heparan sulfate / heparin	KEGG PATHWAY	ssc00534	2	24	0.158043	0.948298	ENSSSCG00000030589|ENSSSCG00000022197	ssc:100625836|ssc:100156717|	100625836|100156717|	HS3ST3A1|HS6ST1|	http://www.genome.jp/kegg-bin/show_pathway?ssc00534/ssc:100156717%09red/ssc:100625836%09red
Mismatch repair	KEGG PATHWAY	ssc03430	2	24	0.158043	0.948298	ENSSSCG00000012916|ENSSSCG00000024222	ssc:100736957|ssc:100337665|	100736957|100337665|	POLD4|MLH1|	http://www.genome.jp/kegg-bin/show_pathway?ssc03430/ssc:100736957%09red/ssc:100337665%09red
Pertussis	KEGG PATHWAY	ssc05133	4	73	0.159614	0.948298	ENSSSCG00000002383|ENSSSCG00000015662|ENSSSCG00000003526|ENSSSCG00000008957	ssc:100144486|ssc:100520761|ssc:100518846|ssc:396900|	100144486|100520761|100518846|396900|	FOS, c-fos| |C1QB|AMCF-II|	http://www.genome.jp/kegg-bin/show_pathway?ssc05133/ssc:396900%09red/ssc:100518846%09red/ssc:100520761%09red/ssc:100144486%09red
Starch and sucrose metabolism	KEGG PATHWAY	ssc00500	3	49	0.169562	0.951434	ENSSSCG00000029384|ENSSSCG00000012000|ENSSSCG00000014838	ssc:100516938|ssc:100156209|ssc:100515088|	100516938|100156209|100515088|	|GBE1|PGM2L1|	http://www.genome.jp/kegg-bin/show_pathway?ssc00500/ssc:100156209%09red/ssc:100515088%09red/ssc:100516938%09red
Endometrial cancer	KEGG PATHWAY	ssc05213	3	49	0.169562	0.951434	ENSSSCG00000013033|ENSSSCG00000023329|ENSSSCG00000024222	ssc:100521065|ssc:100579172|ssc:100337665|	100521065|100579172|100337665|	BAD|APC2|MLH1|	http://www.genome.jp/kegg-bin/show_pathway?ssc05213/ssc:100579172%09red/ssc:100337665%09red/ssc:100521065%09red
Pentose and glucuronate interconversions	KEGG PATHWAY	ssc00040	2	26	0.17758	0.969489	ENSSSCG00000003158|ENSSSCG00000011254	ssc:397337|ssc:100628009|	397337|100628009|	SUS2DD, 2DD, DHDH|XYLB|	http://www.genome.jp/kegg-bin/show_pathway?ssc00040/ssc:100628009%09red/ssc:397337%09red
Fanconi anemia pathway	KEGG PATHWAY	ssc03460	3	51	0.183191	0.972852	ENSSSCG00000010924|ENSSSCG00000024222|ENSSSCG00000023878	ssc:100525658|ssc:100337665|ssc:100621643|	100525658|100337665|100621643|	UBE2T|MLH1|C6H19orf40|	http://www.genome.jp/kegg-bin/show_pathway?ssc03460/ssc:100525658%09red/ssc:100621643%09red/ssc:100337665%09red
Phosphatidylinositol signaling system	KEGG PATHWAY	ssc04070	4	79	0.192019	0.972852	ENSSSCG00000024162|ENSSSCG00000021062|ENSSSCG00000006242|ENSSSCG00000027550	ssc:100623875|ssc:100625799|ssc:100156925|ssc:100627099|	100623875|100625799|100156925|100627099|	IMPA2|DGKB|IMPAD1, IMPA3, gPAPP|PLCD1|	http://www.genome.jp/kegg-bin/show_pathway?ssc04070/ssc:100627099%09red/ssc:100625799%09red/ssc:100623875%09red/ssc:100156925%09red
beta-Alanine metabolism	KEGG PATHWAY	ssc00410	2	28	0.19746	0.972852	ENSSSCG00000012166|ENSSSCG00000026349	ssc:100153052|ssc:100739347|	100153052|100739347|	SMS|ALDH3B1|	http://www.genome.jp/kegg-bin/show_pathway?ssc00410/ssc:100153052%09red/ssc:100739347%09red
Homologous recombination	KEGG PATHWAY	ssc03440	2	28	0.19746	0.972852	ENSSSCG00000012916|ENSSSCG00000026989	ssc:100736957|ssc:100626849|	100736957|100626849|	POLD4|RAD51D|	http://www.genome.jp/kegg-bin/show_pathway?ssc03440/ssc:100736957%09red/ssc:100626849%09red
Glycolysis / Gluconeogenesis	KEGG PATHWAY	ssc00010	3	54	0.204144	0.974766	ENSSSCG00000000685|ENSSSCG00000025881|ENSSSCG00000026349	ssc:100157582|ssc:100516042|ssc:100739347|	100157582|100516042|100739347|	TPI1, TIM|PDHB|ALDH3B1|	http://www.genome.jp/kegg-bin/show_pathway?ssc00010/ssc:100739347%09red/ssc:100157582%09red/ssc:100516042%09red
Fructose and mannose metabolism	KEGG PATHWAY	ssc00051	2	29	0.2075	0.974766	ENSSSCG00000025425|ENSSSCG00000000685	ssc:100625448|ssc:100157582|	100625448|100157582|	FUK|TPI1, TIM|	http://www.genome.jp/kegg-bin/show_pathway?ssc00051/ssc:100625448%09red/ssc:100157582%09red
Other types of O-glycan biosynthesis	KEGG PATHWAY	ssc00514	2	30	0.217591	0.997172	ENSSSCG00000012088|ENSSSCG00000011519	ssc:100738385|ssc:100511227|	100738385|100511227|	POFUT2|GXYLT2|	http://www.genome.jp/kegg-bin/show_pathway?ssc00514/ssc:100511227%09red/ssc:100738385%09red
Rheumatoid arthritis	KEGG PATHWAY	ssc05323	4	87	0.238007	0.997172	ENSSSCG00000011171|ENSSSCG00000002383|ENSSSCG00000026872|ENSSSCG00000008957	ssc:396926|ssc:100144486|ssc:100127162|ssc:396900|	396926|100144486|100127162|396900|	CTSL, CTSL1, CTSL2|FOS, c-fos|APRIL|AMCF-II|	http://www.genome.jp/kegg-bin/show_pathway?ssc05323/ssc:396900%09red/ssc:396926%09red/ssc:100127162%09red/ssc:100144486%09red
Ubiquinone and other terpenoid-quinone biosynthesis	KEGG PATHWAY	ssc00130	1	9	0.242112	0.997172	ENSSSCG00000007764	ssc:100522924|	100522924|	VKORC1|	http://www.genome.jp/kegg-bin/show_pathway?ssc00130/ssc:100522924%09red
Sulfur relay system	KEGG PATHWAY	ssc04122	1	9	0.242112	0.997172	ENSSSCG00000000133	ssc:100153230|	100153230|	TSTD1|	http://www.genome.jp/kegg-bin/show_pathway?ssc04122/ssc:100153230%09red
Tyrosine metabolism	KEGG PATHWAY	ssc00350	2	33	0.248073	0.997172	ENSSSCG00000010067|ENSSSCG00000026349	ssc:397412|ssc:100739347|	397412|100739347|	MIF|ALDH3B1|	http://www.genome.jp/kegg-bin/show_pathway?ssc00350/ssc:100739347%09red/ssc:397412%09red
Biosynthesis of amino acids	KEGG PATHWAY	ssc01230	3	63	0.269662	0.997172	ENSSSCG00000000685|ENSSSCG00000005900|ENSSSCG00000007748	ssc:100157582|ssc:100524618|ssc:100316854|	100157582|100524618|100316854|	TPI1, TIM|GPT|PSPH|	http://www.genome.jp/kegg-bin/show_pathway?ssc01230/ssc:100157582%09red/ssc:100316854%09red/ssc:100524618%09red
Glycine, serine and threonine metabolism	KEGG PATHWAY	ssc00260	2	36	0.278679	0.997172	ENSSSCG00000023142|ENSSSCG00000007748	ssc:100625146|ssc:100316854|	100625146|100316854|	GAMT|PSPH|	http://www.genome.jp/kegg-bin/show_pathway?ssc00260/ssc:100625146%09red/ssc:100316854%09red
Alanine, aspartate and glutamate metabolism	KEGG PATHWAY	ssc00250	2	36	0.278679	0.997172	ENSSSCG00000008902|ENSSSCG00000005900	ssc:100522503|ssc:100524618|	100522503|100524618|	PPAT|GPT|	http://www.genome.jp/kegg-bin/show_pathway?ssc00250/ssc:100522503%09red/ssc:100524618%09red
Primary immunodeficiency	KEGG PATHWAY	ssc05340	2	37	0.288871	0.997172	ENSSSCG00000027971|ENSSSCG00000009356	ssc:100628226|ssc:100155648|	100628226|100155648|	RFXANK|RFXAP|	http://www.genome.jp/kegg-bin/show_pathway?ssc05340/ssc:100628226%09red/ssc:100155648%09red
Antigen processing and presentation	KEGG PATHWAY	ssc04612	3	68	0.307043	0.997172	ENSSSCG00000027971|ENSSSCG00000009356|ENSSSCG00000011171	ssc:100628226|ssc:100155648|ssc:396926|	100628226|100155648|396926|	RFXANK|RFXAP|CTSL, CTSL1, CTSL2|	http://www.genome.jp/kegg-bin/show_pathway?ssc04612/ssc:396926%09red/ssc:100628226%09red/ssc:100155648%09red
Carbon metabolism	KEGG PATHWAY	ssc01200	4	99	0.310844	0.997172	ENSSSCG00000000685|ENSSSCG00000025881|ENSSSCG00000005900|ENSSSCG00000007748	ssc:100157582|ssc:100516042|ssc:100524618|ssc:100316854|	100157582|100516042|100524618|100316854|	TPI1, TIM|PDHB|GPT|PSPH|	http://www.genome.jp/kegg-bin/show_pathway?ssc01200/ssc:100157582%09red/ssc:100516042%09red/ssc:100316854%09red/ssc:100524618%09red
Signaling pathways regulating pluripotency of stem cells	KEGG PATHWAY	ssc04550	5	132	0.320626	0.997172	ENSSSCG00000009357|ENSSSCG00000023329|ENSSSCG00000027450|ENSSSCG00000000759|ENSSSCG00000004977	ssc:100153584|ssc:100579172|ssc:100626978|ssc:100516268|ssc:100170132|	100153584|100579172|100626978|100516268|100170132|	SMAD9|APC2|ID3|WNT5B|NANOG|	http://www.genome.jp/kegg-bin/show_pathway?ssc04550/ssc:100153584%09red/ssc:100516268%09red/ssc:100626978%09red/ssc:100579172%09red/ssc:100170132%09red
Riboflavin metabolism	KEGG PATHWAY	ssc00740	1	13	0.321683	0.997172	ENSSSCG00000006697	ssc:100156584|	100156584|	ACP6|	http://www.genome.jp/kegg-bin/show_pathway?ssc00740/ssc:100156584%09red
Fatty acid degradation	KEGG PATHWAY	ssc00071	2	41	0.329399	0.997172	ENSSSCG00000011250|ENSSSCG00000004510	ssc:100515577|ssc:100312959|	100515577|100312959|	ACAA1|ACAA2|	http://www.genome.jp/kegg-bin/show_pathway?ssc00071/ssc:100312959%09red/ssc:100515577%09red
Ether lipid metabolism	KEGG PATHWAY	ssc00565	2	41	0.329399	0.997172	ENSSSCG00000029070|ENSSSCG00000022599	ssc:100514845|ssc:100514845|	100514845|100514845|	| |	http://www.genome.jp/kegg-bin/show_pathway?ssc00565/ssc:100514845%09red
HIF-1 signaling pathway	KEGG PATHWAY	ssc04066	4	104	0.341877	0.997172	ENSSSCG00000008061|ENSSSCG00000025881|ENSSSCG00000002995|ENSSSCG00000013564	ssc:100519651|ssc:100516042|ssc:100523673|ssc:396755|	100519651|100516042|100523673|396755|	TCEB2|PDHB|EGLN2|INSR|	http://www.genome.jp/kegg-bin/show_pathway?ssc04066/ssc:396755%09red/ssc:100516042%09red/ssc:100519651%09red/ssc:100523673%09red
Bacterial invasion of epithelial cells	KEGG PATHWAY	ssc05100	3	73	0.344598	0.997172	ENSSSCG00000016174|ENSSSCG00000014058|ENSSSCG00000008986	ssc:397620|ssc:100525860|ssc:100523501|	397620|100525860|100523501|	FN1|CLTB|SEPT11|	http://www.genome.jp/kegg-bin/show_pathway?ssc05100/ssc:397620%09red/ssc:100523501%09red/ssc:100525860%09red
Glycosphingolipid biosynthesis - globo series	KEGG PATHWAY	ssc00603	1	15	0.358283	0.997172	ENSSSCG00000025089	ssc:100627772|	100627772|	ST3GAL2|	http://www.genome.jp/kegg-bin/show_pathway?ssc00603/ssc:100627772%09red
Intestinal immune network for IgA production	KEGG PATHWAY	ssc04672	2	44	0.359379	0.997172	ENSSSCG00000016009|ENSSSCG00000026872	ssc:100521477|ssc:100127162|	100521477|100127162|	ITGA4|APRIL|	http://www.genome.jp/kegg-bin/show_pathway?ssc04672/ssc:100127162%09red/ssc:100521477%09red
Endocytosis	KEGG PATHWAY	ssc04144	7	206	0.364664	0.997172	ENSSSCG00000014058|ENSSSCG00000027209|ENSSSCG00000022162|ENSSSCG00000016593|ENSSSCG00000016183|ENSSSCG00000029362|ENSSSCG00000009956	ssc:100525860|ssc:100623422|ssc:100625740|ssc:100270722|ssc:100124654|ssc:100622139|ssc:100156449|	100525860|100623422|100625740|100270722|100124654|100622139|100156449|	CLTB|ACAP1| |ARF5|CXCR2, IL8RB| |ADRBK2|	http://www.genome.jp/kegg-bin/show_pathway?ssc04144/ssc:100270722%09red/ssc:100623422%09red/ssc:100124654%09red/ssc:100525860%09red/ssc:100622139%09red/ssc:100156449%09red/ssc:100625740%09red
Fatty acid metabolism	KEGG PATHWAY	ssc01212	2	45	0.369266	0.997172	ENSSSCG00000011250|ENSSSCG00000004510	ssc:100515577|ssc:100312959|	100515577|100312959|	ACAA1|ACAA2|	http://www.genome.jp/kegg-bin/show_pathway?ssc01212/ssc:100312959%09red/ssc:100515577%09red
Primary bile acid biosynthesis	KEGG PATHWAY	ssc00120	1	16	0.375837	0.997172	ENSSSCG00000016822	ssc:100512020|	100512020|	AMACR|	http://www.genome.jp/kegg-bin/show_pathway?ssc00120/ssc:100512020%09red
Valine, leucine and isoleucine degradation	KEGG PATHWAY	ssc00280	2	46	0.379091	0.997172	ENSSSCG00000011250|ENSSSCG00000004510	ssc:100515577|ssc:100312959|	100515577|100312959|	ACAA1|ACAA2|	http://www.genome.jp/kegg-bin/show_pathway?ssc00280/ssc:100312959%09red/ssc:100515577%09red
Staphylococcus aureus infection	KEGG PATHWAY	ssc05150	2	47	0.388852	0.997172	ENSSSCG00000013418|ENSSSCG00000003526	ssc:396877|ssc:100518846|	396877|100518846|	CFD, DF|C1QB|	http://www.genome.jp/kegg-bin/show_pathway?ssc05150/ssc:100518846%09red/ssc:396877%09red
Biosynthesis of unsaturated fatty acids	KEGG PATHWAY	ssc01040	1	17	0.392911	0.997172	ENSSSCG00000011250	ssc:100515577|	100515577|	ACAA1|	http://www.genome.jp/kegg-bin/show_pathway?ssc01040/ssc:100515577%09red
Glycosaminoglycan biosynthesis - keratan sulfate	KEGG PATHWAY	ssc00533	1	17	0.392911	0.997172	ENSSSCG00000025089	ssc:100627772|	100627772|	ST3GAL2|	http://www.genome.jp/kegg-bin/show_pathway?ssc00533/ssc:100627772%09red
Metabolism of xenobiotics by cytochrome P450	KEGG PATHWAY	ssc00980	2	49	0.408163	0.997172	ENSSSCG00000026349|ENSSSCG00000003158	ssc:100739347|ssc:397337|	100739347|397337|	ALDH3B1|SUS2DD, 2DD, DHDH|	http://www.genome.jp/kegg-bin/show_pathway?ssc00980/ssc:100739347%09red/ssc:397337%09red
Amino sugar and nucleotide sugar metabolism	KEGG PATHWAY	ssc00520	2	49	0.408163	0.997172	ENSSSCG00000025425|ENSSSCG00000005373	ssc:100625448|ssc:100155883|	100625448|100155883|	FUK|NANS|	http://www.genome.jp/kegg-bin/show_pathway?ssc00520/ssc:100625448%09red/ssc:100155883%09red
2-Oxocarboxylic acid metabolism	KEGG PATHWAY	ssc01210	1	18	0.409519	0.997172	ENSSSCG00000005900	ssc:100524618|	100524618|	GPT|	http://www.genome.jp/kegg-bin/show_pathway?ssc01210/ssc:100524618%09red
Cell cycle	KEGG PATHWAY	ssc04110	4	115	0.410152	0.997172	ENSSSCG00000011624|ENSSSCG00000007268|ENSSSCG00000025719|ENSSSCG00000013643	ssc:100519111|ssc:100153846|ssc:100620851|ssc:100525560|	100519111|100153846|100620851|100525560|	MCM2, MCM7|E2F1| |CDKN2D|	http://www.genome.jp/kegg-bin/show_pathway?ssc04110/ssc:100620851%09red/ssc:100153846%09red/ssc:100519111%09red/ssc:100525560%09red
Glycerophospholipid metabolism	KEGG PATHWAY	ssc00564	3	83	0.418842	0.997172	ENSSSCG00000007019|ENSSSCG00000021062|ENSSSCG00000018055	ssc:100152836|ssc:100625799|ssc:397654|	100152836|100625799|397654|	AGPAT6, TSARG7|DGKB|PEMT|	http://www.genome.jp/kegg-bin/show_pathway?ssc00564/ssc:100625799%09red/ssc:397654%09red/ssc:100152836%09red
HTLV-I infection	KEGG PATHWAY	ssc05166	8	253	0.421707	0.997172	ENSSSCG00000007268|ENSSSCG00000025719|ENSSSCG00000012967|ENSSSCG00000002383|ENSSSCG00000023329|ENSSSCG00000012916|ENSSSCG00000023609|ENSSSCG00000000759	ssc:100153846|ssc:100620851|ssc:100525205|ssc:100144486|ssc:100579172|ssc:100736957|ssc:100157451|ssc:100516268|	100153846|100620851|100525205|100144486|100579172|100736957|100157451|100516268|	E2F1| |FOSL1|FOS, c-fos|APC2|POLD4|TP53INP1|WNT5B|	http://www.genome.jp/kegg-bin/show_pathway?ssc05166/ssc:100736957%09red/ssc:100579172%09red/ssc:100620851%09red/ssc:100525205%09red/ssc:100153846%09red/ssc:100516268%09red/ssc:100144486%09red/ssc:100157451%09red
Terpenoid backbone biosynthesis	KEGG PATHWAY	ssc00900	1	19	0.425673	0.997172	ENSSSCG00000006535	ssc:100152301|	100152301|	PMVK|	http://www.genome.jp/kegg-bin/show_pathway?ssc00900/ssc:100152301%09red
Non-small cell lung cancer	KEGG PATHWAY	ssc05223	2	52	0.436557	0.997172	ENSSSCG00000013033|ENSSSCG00000007268	ssc:100521065|ssc:100153846|	100521065|100153846|	BAD|E2F1|	http://www.genome.jp/kegg-bin/show_pathway?ssc05223/ssc:100153846%09red/ssc:100521065%09red
Basal cell carcinoma	KEGG PATHWAY	ssc05217	2	52	0.436557	0.997172	ENSSSCG00000023329|ENSSSCG00000000759	ssc:100579172|ssc:100516268|	100579172|100516268|	APC2|WNT5B|	http://www.genome.jp/kegg-bin/show_pathway?ssc05217/ssc:100516268%09red/ssc:100579172%09red
Glycerolipid metabolism	KEGG PATHWAY	ssc00561	2	54	0.45507	0.997172	ENSSSCG00000007019|ENSSSCG00000021062	ssc:100152836|ssc:100625799|	100152836|100625799|	AGPAT6, TSARG7|DGKB|	http://www.genome.jp/kegg-bin/show_pathway?ssc00561/ssc:100625799%09red/ssc:100152836%09red
Morphine addiction	KEGG PATHWAY	ssc05032	3	90	0.469148	0.997172	ENSSSCG00000029451|ENSSSCG00000009956|ENSSSCG00000028092	ssc:100521662|ssc:100156449|ssc:100524008|	100521662|100156449|100524008|	|ADRBK2| |	http://www.genome.jp/kegg-bin/show_pathway?ssc05032/ssc:100156449%09red/ssc:100524008%09red/ssc:100521662%09red
alpha-Linolenic acid metabolism	KEGG PATHWAY	ssc00592	1	22	0.471537	0.997172	ENSSSCG00000011250	ssc:100515577|	100515577|	ACAA1|	http://www.genome.jp/kegg-bin/show_pathway?ssc00592/ssc:100515577%09red
Histidine metabolism	KEGG PATHWAY	ssc00340	1	22	0.471537	0.997172	ENSSSCG00000026349	ssc:100739347|	100739347|	ALDH3B1|	http://www.genome.jp/kegg-bin/show_pathway?ssc00340/ssc:100739347%09red
Wnt signaling pathway	KEGG PATHWAY	ssc04310	4	128	0.488695	0.997172	ENSSSCG00000023329|ENSSSCG00000000759|ENSSSCG00000012967|ENSSSCG00000024793	ssc:100579172|ssc:100516268|ssc:100525205|ssc:100627921|	100579172|100516268|100525205|100627921|	APC2|WNT5B|FOSL1|PORCN|	http://www.genome.jp/kegg-bin/show_pathway?ssc04310/ssc:100525205%09red/ssc:100516268%09red/ssc:100627921%09red/ssc:100579172%09red
Nicotinate and nicotinamide metabolism	KEGG PATHWAY	ssc00760	1	25	0.513742	0.997172	ENSSSCG00000002135	ssc:100157138|	100157138|	PNP, NP|	http://www.genome.jp/kegg-bin/show_pathway?ssc00760/ssc:100157138%09red
Insulin signaling pathway	KEGG PATHWAY	ssc04910	4	133	0.517779	0.997172	ENSSSCG00000013033|ENSSSCG00000002021|ENSSSCG00000013564|ENSSSCG00000012411	ssc:100521065|ssc:100156465|ssc:396755|ssc:100525092|	100521065|100156465|396755|100525092|	BAD|PPP1R3E|INSR| |	http://www.genome.jp/kegg-bin/show_pathway?ssc04910/ssc:100156465%09red/ssc:396755%09red/ssc:100525092%09red/ssc:100521065%09red
Ubiquitin mediated proteolysis	KEGG PATHWAY	ssc04120	4	134	0.523504	0.997172	ENSSSCG00000008061|ENSSSCG00000025719|ENSSSCG00000001657|ENSSSCG00000012637	ssc:100519651|ssc:100620851|ssc:100141398|ssc:100739402|	100519651|100620851|100141398|100739402|	TCEB2| |CUL7| |	http://www.genome.jp/kegg-bin/show_pathway?ssc04120/ssc:100620851%09red/ssc:100141398%09red/ssc:100739402%09red/ssc:100519651%09red
Glycosylphosphatidylinositol(GPI)-anchor biosynthesis	KEGG PATHWAY	ssc00563	1	26	0.527049	0.997172	ENSSSCG00000012061	ssc:100154885|	100154885|	PIGP|	http://www.genome.jp/kegg-bin/show_pathway?ssc00563/ssc:100154885%09red
Pancreatic cancer	KEGG PATHWAY	ssc05212	2	63	0.533788	0.997172	ENSSSCG00000013033|ENSSSCG00000007268	ssc:100521065|ssc:100153846|	100521065|100153846|	BAD|E2F1|	http://www.genome.jp/kegg-bin/show_pathway?ssc05212/ssc:100153846%09red/ssc:100521065%09red
Leishmaniasis	KEGG PATHWAY	ssc05140	2	63	0.533788	0.997172	ENSSSCG00000002383|ENSSSCG00000016009	ssc:100144486|ssc:100521477|	100144486|100521477|	FOS, c-fos|ITGA4|	http://www.genome.jp/kegg-bin/show_pathway?ssc05140/ssc:100144486%09red/ssc:100521477%09red
Chemokine signaling pathway	KEGG PATHWAY	ssc04062	5	173	0.538392	0.997172	ENSSSCG00000028092|ENSSSCG00000008957|ENSSSCG00000013023|ENSSSCG00000009956|ENSSSCG00000016183	ssc:100524008|ssc:396900|ssc:100626093|ssc:100156449|ssc:100124654|	100524008|396900|100626093|100156449|100124654|	|AMCF-II|RASGRP2|ADRBK2|CXCR2, IL8RB|	http://www.genome.jp/kegg-bin/show_pathway?ssc04062/ssc:396900%09red/ssc:100626093%09red/ssc:100156449%09red/ssc:100124654%09red/ssc:100524008%09red
Renal cell carcinoma	KEGG PATHWAY	ssc05211	2	64	0.542042	0.997172	ENSSSCG00000008061|ENSSSCG00000002995	ssc:100519651|ssc:100523673|	100519651|100523673|	TCEB2|EGLN2|	http://www.genome.jp/kegg-bin/show_pathway?ssc05211/ssc:100519651%09red/ssc:100523673%09red
Pathways in cancer	KEGG PATHWAY	ssc05200	9	319	0.542539	0.997172	ENSSSCG00000016174|ENSSSCG00000007268|ENSSSCG00000013033|ENSSSCG00000008061|ENSSSCG00000024222|ENSSSCG00000002995|ENSSSCG00000002383|ENSSSCG00000023329|ENSSSCG00000000759	ssc:397620|ssc:100153846|ssc:100521065|ssc:100519651|ssc:100337665|ssc:100523673|ssc:100144486|ssc:100579172|ssc:100516268|	397620|100153846|100521065|100519651|100337665|100523673|100144486|100579172|100516268|	FN1|E2F1|BAD|TCEB2|MLH1|EGLN2|FOS, c-fos|APC2|WNT5B|	http://www.genome.jp/kegg-bin/show_pathway?ssc05200/ssc:397620%09red/ssc:100519651%09red/ssc:100579172%09red/ssc:100153846%09red/ssc:100523673%09red/ssc:100516268%09red/ssc:100144486%09red/ssc:100521065%09red/ssc:100337665%09red
Tuberculosis	KEGG PATHWAY	ssc05152	5	174	0.543377	0.997172	ENSSSCG00000013033|ENSSSCG00000027971|ENSSSCG00000009356|ENSSSCG00000017300|ENSSSCG00000029691	ssc:100521065|ssc:100628226|ssc:100155648|ssc:100516106|ssc:100621483|	100521065|100628226|100155648|100516106|100621483|	BAD|RFXANK|RFXAP|MRC2|CORO1A|	http://www.genome.jp/kegg-bin/show_pathway?ssc05152/ssc:100155648%09red/ssc:100628226%09red/ssc:100621483%09red/ssc:100516106%09red/ssc:100521065%09red
Hippo signaling pathway	KEGG PATHWAY	ssc04390	4	138	0.546067	0.997172	ENSSSCG00000023329|ENSSSCG00000008952|ENSSSCG00000000759|ENSSSCG00000003112	ssc:100579172|ssc:100525351|ssc:100516268|ssc:100517403|	100579172|100525351|100516268|100517403|	APC2|RASSF6|WNT5B|BBC3|	http://www.genome.jp/kegg-bin/show_pathway?ssc04390/ssc:100525351%09red/ssc:100516268%09red/ssc:100579172%09red/ssc:100517403%09red
Arrhythmogenic right ventricular cardiomyopathy (ARVC)	KEGG PATHWAY	ssc05412	2	67	0.566189	0.997172	ENSSSCG00000004241|ENSSSCG00000016009	ssc:100518636|ssc:100521477|	100518636|100521477|	GJA1, CX43|ITGA4|	http://www.genome.jp/kegg-bin/show_pathway?ssc05412/ssc:100518636%09red/ssc:100521477%09red
PPAR signaling pathway	KEGG PATHWAY	ssc03320	2	68	0.574032	0.997172	ENSSSCG00000011250|ENSSSCG00000014257	ssc:100515577|ssc:100517271|	100515577|100517271|	ACAA1|SLC27A6|	http://www.genome.jp/kegg-bin/show_pathway?ssc03320/ssc:100515577%09red/ssc:100517271%09red
Citrate cycle (TCA cycle)	KEGG PATHWAY	ssc00020	1	30	0.576739	0.997172	ENSSSCG00000025881	ssc:100516042|	100516042|	PDHB|	http://www.genome.jp/kegg-bin/show_pathway?ssc00020/ssc:100516042%09red
Melanoma	KEGG PATHWAY	ssc05218	2	69	0.58177	0.997172	ENSSSCG00000013033|ENSSSCG00000007268	ssc:100521065|ssc:100153846|	100521065|100153846|	BAD|E2F1|	http://www.genome.jp/kegg-bin/show_pathway?ssc05218/ssc:100153846%09red/ssc:100521065%09red
Chronic myeloid leukemia	KEGG PATHWAY	ssc05220	2	69	0.58177	0.997172	ENSSSCG00000013033|ENSSSCG00000007268	ssc:100521065|ssc:100153846|	100521065|100153846|	BAD|E2F1|	http://www.genome.jp/kegg-bin/show_pathway?ssc05220/ssc:100153846%09red/ssc:100521065%09red
Drug metabolism - other enzymes	KEGG PATHWAY	ssc00983	1	31	0.588324	0.997172	ENSSSCG00000030388	ssc:100625277|	100625277|	|	http://www.genome.jp/kegg-bin/show_pathway?ssc00983/ssc:100625277%09red
p53 signaling pathway	KEGG PATHWAY	ssc04115	2	73	0.611685	0.997172	ENSSSCG00000008586|ENSSSCG00000003112	ssc:100521786|ssc:100517403|	100521786|100517403|	TP53I3|BBC3|	http://www.genome.jp/kegg-bin/show_pathway?ssc04115/ssc:100521786%09red/ssc:100517403%09red
TGF-beta signaling pathway	KEGG PATHWAY	ssc04350	2	74	0.618903	0.997172	ENSSSCG00000027450|ENSSSCG00000009357	ssc:100626978|ssc:100153584|	100626978|100153584|	ID3|SMAD9|	http://www.genome.jp/kegg-bin/show_pathway?ssc04350/ssc:100153584%09red/ssc:100626978%09red
RNA polymerase	KEGG PATHWAY	ssc03020	1	34	0.621215	0.997172	ENSSSCG00000021472	ssc:100623333|	100623333|	POLR2E|	http://www.genome.jp/kegg-bin/show_pathway?ssc03020/ssc:100623333%09red
Prion diseases	KEGG PATHWAY	ssc05020	1	34	0.621215	0.997172	ENSSSCG00000003526	ssc:100518846|	100518846|	C1QB|	http://www.genome.jp/kegg-bin/show_pathway?ssc05020/ssc:100518846%09red
Lysosome	KEGG PATHWAY	ssc04142	3	115	0.629562	0.997172	ENSSSCG00000014058|ENSSSCG00000007033|ENSSSCG00000011171	ssc:100525860|ssc:100525135|ssc:396926|	100525860|100525135|396926|	CLTB|AP3M2|CTSL, CTSL1, CTSL2|	http://www.genome.jp/kegg-bin/show_pathway?ssc04142/ssc:100525135%09red/ssc:396926%09red/ssc:100525860%09red
Bladder cancer	KEGG PATHWAY	ssc05219	1	35	0.631585	0.997172	ENSSSCG00000007268	ssc:100153846|	100153846|	E2F1|	http://www.genome.jp/kegg-bin/show_pathway?ssc05219/ssc:100153846%09red
Neurotrophin signaling pathway	KEGG PATHWAY	ssc04722	3	118	0.646402	0.997172	ENSSSCG00000013033|ENSSSCG00000013494|ENSSSCG00000003160	ssc:100521065|ssc:100521543|ssc:100511085|	100521065|100521543|100511085|	BAD|MATK|NTF4|	http://www.genome.jp/kegg-bin/show_pathway?ssc04722/ssc:100521543%09red/ssc:100521065%09red/ssc:100511085%09red
Hypertrophic cardiomyopathy (HCM)	KEGG PATHWAY	ssc05410	2	78	0.646743	0.997172	ENSSSCG00000016009|ENSSSCG00000004570	ssc:100521477|ssc:100037999|	100521477|100037999|	ITGA4|TPM1|	http://www.genome.jp/kegg-bin/show_pathway?ssc05410/ssc:100037999%09red/ssc:100521477%09red
Regulation of autophagy	KEGG PATHWAY	ssc04140	1	38	0.661024	0.997172	ENSSSCG00000014819	ssc:100511396|	100511396|	ATG16L2|	http://www.genome.jp/kegg-bin/show_pathway?ssc04140/ssc:100511396%09red
Salmonella infection	KEGG PATHWAY	ssc05132	2	81	0.666548	0.997172	ENSSSCG00000002383|ENSSSCG00000001659	ssc:100144486|ssc:100157157|	100144486|100157157|	FOS, c-fos|KLC4|	http://www.genome.jp/kegg-bin/show_pathway?ssc05132/ssc:100157157%09red/ssc:100144486%09red
Protein processing in endoplasmic reticulum	KEGG PATHWAY	ssc04141	4	162	0.668484	0.997172	ENSSSCG00000013510|ENSSSCG00000004244|ENSSSCG00000010024|ENSSSCG00000026539	ssc:100524481|ssc:396919|ssc:100157569|ssc:100626868|	100524481|396919|100157569|100626868|	UBXN6|MAN1A1, MAN1A|RNF185| |	http://www.genome.jp/kegg-bin/show_pathway?ssc04141/ssc:100524481%09red/ssc:100157569%09red/ssc:100626868%09red/ssc:396919%09red
ECM-receptor interaction	KEGG PATHWAY	ssc04512	2	82	0.672948	0.997172	ENSSSCG00000016174|ENSSSCG00000016009	ssc:397620|ssc:100521477|	397620|100521477|	FN1|ITGA4|	http://www.genome.jp/kegg-bin/show_pathway?ssc04512/ssc:397620%09red/ssc:100521477%09red
Dilated cardiomyopathy	KEGG PATHWAY	ssc05414	2	84	0.685447	0.997172	ENSSSCG00000016009|ENSSSCG00000004570	ssc:100521477|ssc:100037999|	100521477|100037999|	ITGA4|TPM1|	http://www.genome.jp/kegg-bin/show_pathway?ssc05414/ssc:100037999%09red/ssc:100521477%09red
Aldosterone-regulated sodium reabsorption	KEGG PATHWAY	ssc04960	1	41	0.688114	0.997172	ENSSSCG00000013564	ssc:396755|	396755|	INSR|	http://www.genome.jp/kegg-bin/show_pathway?ssc04960/ssc:396755%09red
Prostate cancer	KEGG PATHWAY	ssc05215	2	85	0.691549	0.997172	ENSSSCG00000013033|ENSSSCG00000007268	ssc:100521065|ssc:100153846|	100521065|100153846|	BAD|E2F1|	http://www.genome.jp/kegg-bin/show_pathway?ssc05215/ssc:100153846%09red/ssc:100521065%09red
Hematopoietic cell lineage	KEGG PATHWAY	ssc04640	2	85	0.691549	0.997172	ENSSSCG00000016009|ENSSSCG00000024791	ssc:100521477|ssc:397347|	100521477|397347|	ITGA4|CD59|	http://www.genome.jp/kegg-bin/show_pathway?ssc04640/ssc:397347%09red/ssc:100521477%09red
Mineral absorption	KEGG PATHWAY	ssc04978	1	42	0.696655	0.997172	ENSSSCG00000021581	ssc:397147|	397147|	CLC-2, CLCN2|	http://www.genome.jp/kegg-bin/show_pathway?ssc04978/ssc:397147%09red
Endocrine and other factor-regulated calcium reabsorption	KEGG PATHWAY	ssc04961	1	42	0.696655	0.997172	ENSSSCG00000014058	ssc:100525860|	100525860|	CLTB|	http://www.genome.jp/kegg-bin/show_pathway?ssc04961/ssc:100525860%09red
Carbohydrate digestion and absorption	KEGG PATHWAY	ssc04973	1	42	0.696655	0.997172	ENSSSCG00000015105	ssc:100516688|	100516688|	SLC37A4|	http://www.genome.jp/kegg-bin/show_pathway?ssc04973/ssc:100516688%09red
ABC transporters	KEGG PATHWAY	ssc02010	1	43	0.704962	0.997172	ENSSSCG00000015113	ssc:100518504|	100518504|	ABCG4|	http://www.genome.jp/kegg-bin/show_pathway?ssc02010/ssc:100518504%09red
Vasopressin-regulated water reabsorption	KEGG PATHWAY	ssc04962	1	43	0.704962	0.997172	ENSSSCG00000007768	ssc:100523599|	100523599|	STX4|	http://www.genome.jp/kegg-bin/show_pathway?ssc04962/ssc:100523599%09red
Small cell lung cancer	KEGG PATHWAY	ssc05222	2	88	0.709269	0.997172	ENSSSCG00000016174|ENSSSCG00000007268	ssc:397620|ssc:100153846|	397620|100153846|	FN1|E2F1|	http://www.genome.jp/kegg-bin/show_pathway?ssc05222/ssc:397620%09red/ssc:100153846%09red
Nucleotide excision repair	KEGG PATHWAY	ssc03420	1	44	0.713043	0.997172	ENSSSCG00000012916	ssc:100736957|	100736957|	POLD4|	http://www.genome.jp/kegg-bin/show_pathway?ssc03420/ssc:100736957%09red
Sphingolipid metabolism	KEGG PATHWAY	ssc00600	1	45	0.720902	0.997172	ENSSSCG00000004408	ssc:100152155|	100152155|	SMPD2|	http://www.genome.jp/kegg-bin/show_pathway?ssc00600/ssc:100152155%09red
Osteoclast differentiation	KEGG PATHWAY	ssc04380	3	133	0.722365	0.997172	ENSSSCG00000002383|ENSSSCG00000012967|ENSSSCG00000027396	ssc:100144486|ssc:100525205|ssc:100623777|	100144486|100525205|100623777|	FOS, c-fos|FOSL1| |	http://www.genome.jp/kegg-bin/show_pathway?ssc04380/ssc:100525205%09red/ssc:100623777%09red/ssc:100144486%09red
Apoptosis	KEGG PATHWAY	ssc04210	2	91	0.72613	0.997172	ENSSSCG00000013033|ENSSSCG00000009140	ssc:100521065|ssc:100517293|	100521065|100517293|	BAD|CASP6|	http://www.genome.jp/kegg-bin/show_pathway?ssc04210/ssc:100517293%09red/ssc:100521065%09red
Hedgehog signaling pathway	KEGG PATHWAY	ssc04340	1	47	0.735981	0.997172	ENSSSCG00000000759	ssc:100516268|	100516268|	WNT5B|	http://www.genome.jp/kegg-bin/show_pathway?ssc04340/ssc:100516268%09red
Type II diabetes mellitus	KEGG PATHWAY	ssc04930	1	48	0.743213	0.997172	ENSSSCG00000013564	ssc:396755|	396755|	INSR|	http://www.genome.jp/kegg-bin/show_pathway?ssc04930/ssc:396755%09red
N-Glycan biosynthesis	KEGG PATHWAY	ssc00510	1	49	0.750247	0.997172	ENSSSCG00000004244	ssc:396919|	396919|	MAN1A1, MAN1A|	http://www.genome.jp/kegg-bin/show_pathway?ssc00510/ssc:396919%09red
Drug metabolism - cytochrome P450	KEGG PATHWAY	ssc00982	1	49	0.750247	0.997172	ENSSSCG00000026349	ssc:100739347|	100739347|	ALDH3B1|	http://www.genome.jp/kegg-bin/show_pathway?ssc00982/ssc:100739347%09red
Glutathione metabolism	KEGG PATHWAY	ssc00480	1	50	0.757089	0.997172	ENSSSCG00000012166	ssc:100153052|	100153052|	SMS|	http://www.genome.jp/kegg-bin/show_pathway?ssc00480/ssc:100153052%09red
Circadian entrainment	KEGG PATHWAY	ssc04713	2	98	0.762272	0.997172	ENSSSCG00000002383|ENSSSCG00000028092	ssc:100144486|ssc:100524008|	100144486|100524008|	FOS, c-fos| |	http://www.genome.jp/kegg-bin/show_pathway?ssc04713/ssc:100524008%09red/ssc:100144486%09red
Ovarian steroidogenesis	KEGG PATHWAY	ssc04913	1	51	0.763743	0.997172	ENSSSCG00000013564	ssc:396755|	396755|	INSR|	http://www.genome.jp/kegg-bin/show_pathway?ssc04913/ssc:396755%09red
Viral carcinogenesis	KEGG PATHWAY	ssc05203	4	189	0.776679	0.997172	ENSSSCG00000013033|ENSSSCG00000029773|ENSSSCG00000022049|ENSSSCG00000001177	ssc:100521065|ssc:100158117|ssc:100158117|ssc:100158117|	100521065|100158117|100158117|100158117|	BAD| | | |	http://www.genome.jp/kegg-bin/show_pathway?ssc05203/ssc:100158117%09red/ssc:100521065%09red
Phagosome	KEGG PATHWAY	ssc04145	3	147	0.781205	0.997172	ENSSSCG00000029691|ENSSSCG00000017300|ENSSSCG00000011171	ssc:100621483|ssc:100516106|ssc:396926|	100621483|100516106|396926|	CORO1A|MRC2|CTSL, CTSL1, CTSL2|	http://www.genome.jp/kegg-bin/show_pathway?ssc04145/ssc:396926%09red/ssc:100621483%09red/ssc:100516106%09red
Acute myeloid leukemia	KEGG PATHWAY	ssc05221	1	54	0.782635	0.997172	ENSSSCG00000013033	ssc:100521065|	100521065|	BAD|	http://www.genome.jp/kegg-bin/show_pathway?ssc05221/ssc:100521065%09red
Proteoglycans in cancer	KEGG PATHWAY	ssc05205	4	192	0.786777	0.997172	ENSSSCG00000016174|ENSSSCG00000000759|ENSSSCG00000011171|ENSSSCG00000004977	ssc:397620|ssc:100516268|ssc:396926|ssc:100170132|	397620|100516268|396926|100170132|	FN1|WNT5B|CTSL, CTSL1, CTSL2|NANOG|	http://www.genome.jp/kegg-bin/show_pathway?ssc05205/ssc:396926%09red/ssc:397620%09red/ssc:100516268%09red/ssc:100170132%09red
Amyotrophic lateral sclerosis (ALS)	KEGG PATHWAY	ssc05014	1	55	0.78859	0.997172	ENSSSCG00000013033	ssc:100521065|	100521065|	BAD|	http://www.genome.jp/kegg-bin/show_pathway?ssc05014/ssc:100521065%09red
Hepatitis B	KEGG PATHWAY	ssc05161	3	151	0.796003	0.997172	ENSSSCG00000013033|ENSSSCG00000007268|ENSSSCG00000002383	ssc:100521065|ssc:100153846|ssc:100144486|	100521065|100153846|100144486|	BAD|E2F1|FOS, c-fos|	http://www.genome.jp/kegg-bin/show_pathway?ssc05161/ssc:100153846%09red/ssc:100144486%09red/ssc:100521065%09red
Amoebiasis	KEGG PATHWAY	ssc05146	2	107	0.802606	0.997172	ENSSSCG00000016174|ENSSSCG00000004890	ssc:397620|ssc:100519286|	397620|100519286|	FN1|SERPINB2|	http://www.genome.jp/kegg-bin/show_pathway?ssc05146/ssc:397620%09red/ssc:100519286%09red
VEGF signaling pathway	KEGG PATHWAY	ssc04370	1	58	0.805498	0.997172	ENSSSCG00000013033	ssc:100521065|	100521065|	BAD|	http://www.genome.jp/kegg-bin/show_pathway?ssc04370/ssc:100521065%09red
Chagas disease (American trypanosomiasis)	KEGG PATHWAY	ssc05142	2	108	0.806691	0.997172	ENSSSCG00000002383|ENSSSCG00000003526	ssc:100144486|ssc:100518846|	100144486|100518846|	FOS, c-fos|C1QB|	http://www.genome.jp/kegg-bin/show_pathway?ssc05142/ssc:100518846%09red/ssc:100144486%09red
Synaptic vesicle cycle	KEGG PATHWAY	ssc04721	1	59	0.810828	0.997172	ENSSSCG00000014058	ssc:100525860|	100525860|	CLTB|	http://www.genome.jp/kegg-bin/show_pathway?ssc04721/ssc:100525860%09red
Chemical carcinogenesis	KEGG PATHWAY	ssc05204	1	60	0.816012	0.997172	ENSSSCG00000026349	ssc:100739347|	100739347|	ALDH3B1|	http://www.genome.jp/kegg-bin/show_pathway?ssc05204/ssc:100739347%09red
Cytosolic DNA-sensing pathway	KEGG PATHWAY	ssc04623	1	61	0.821055	0.997172	ENSSSCG00000021472	ssc:100623333|	100623333|	POLR2E|	http://www.genome.jp/kegg-bin/show_pathway?ssc04623/ssc:100623333%09red
Glioma	KEGG PATHWAY	ssc05214	1	61	0.821055	0.997172	ENSSSCG00000007268	ssc:100153846|	100153846|	E2F1|	http://www.genome.jp/kegg-bin/show_pathway?ssc05214/ssc:100153846%09red
Cholinergic synapse	KEGG PATHWAY	ssc04725	2	113	0.826008	0.997172	ENSSSCG00000002383|ENSSSCG00000028092	ssc:100144486|ssc:100524008|	100144486|100524008|	FOS, c-fos| |	http://www.genome.jp/kegg-bin/show_pathway?ssc04725/ssc:100524008%09red/ssc:100144486%09red
Thyroid hormone signaling pathway	KEGG PATHWAY	ssc04919	2	113	0.826008	0.997172	ENSSSCG00000013033|ENSSSCG00000027550	ssc:100521065|ssc:100627099|	100521065|100627099|	BAD|PLCD1|	http://www.genome.jp/kegg-bin/show_pathway?ssc04919/ssc:100627099%09red/ssc:100521065%09red
MAPK signaling pathway	KEGG PATHWAY	ssc04010	5	249	0.827044	0.997172	ENSSSCG00000003160|ENSSSCG00000008128|ENSSSCG00000002383|ENSSSCG00000012062|ENSSSCG00000013023	ssc:100511085|ssc:100622812|ssc:100144486|ssc:100513542|ssc:100626093|	100511085|100622812|100144486|100513542|100626093|	NTF4|DUSP2|FOS, c-fos|PPP5C|RASGRP2|	http://www.genome.jp/kegg-bin/show_pathway?ssc04010/ssc:100626093%09red/ssc:100513542%09red/ssc:100622812%09red/ssc:100144486%09red/ssc:100511085%09red
Legionellosis	KEGG PATHWAY	ssc05134	1	64	0.835369	0.997172	ENSSSCG00000016095	ssc:100141471|	100141471|	CLK1|	http://www.genome.jp/kegg-bin/show_pathway?ssc05134/ssc:100141471%09red
Amphetamine addiction	KEGG PATHWAY	ssc05031	1	65	0.839882	0.997172	ENSSSCG00000002383	ssc:100144486|	100144486|	FOS, c-fos|	http://www.genome.jp/kegg-bin/show_pathway?ssc05031/ssc:100144486%09red
AMPK signaling pathway	KEGG PATHWAY	ssc04152	2	118	0.843571	0.997172	ENSSSCG00000013564|ENSSSCG00000009815	ssc:396755|ssc:100157312|	396755|100157312|	INSR|CAMKK2|	http://www.genome.jp/kegg-bin/show_pathway?ssc04152/ssc:100157312%09red/ssc:396755%09red
Prolactin signaling pathway	KEGG PATHWAY	ssc04917	1	67	0.84854	0.997172	ENSSSCG00000002383	ssc:100144486|	100144486|	FOS, c-fos|	http://www.genome.jp/kegg-bin/show_pathway?ssc04917/ssc:100144486%09red
Dopaminergic synapse	KEGG PATHWAY	ssc04728	2	120	0.850135	0.997172	ENSSSCG00000002383|ENSSSCG00000028092	ssc:100144486|ssc:100524008|	100144486|100524008|	FOS, c-fos| |	http://www.genome.jp/kegg-bin/show_pathway?ssc04728/ssc:100524008%09red/ssc:100144486%09red
Aminoacyl-tRNA biosynthesis	KEGG PATHWAY	ssc00970	1	68	0.852692	0.997172	ENSSSCG00000009907	ssc:100153423|	100153423|	GATC|	http://www.genome.jp/kegg-bin/show_pathway?ssc00970/ssc:100153423%09red
RIG-I-like receptor signaling pathway	KEGG PATHWAY	ssc04622	1	68	0.852692	0.997172	ENSSSCG00000015114	ssc:100518678|	100518678|	NLRX1|	http://www.genome.jp/kegg-bin/show_pathway?ssc04622/ssc:100518678%09red
Glutamatergic synapse	KEGG PATHWAY	ssc04724	2	123	0.859511	0.997172	ENSSSCG00000009956|ENSSSCG00000028092	ssc:100156449|ssc:100524008|	100156449|100524008|	ADRBK2| |	http://www.genome.jp/kegg-bin/show_pathway?ssc04724/ssc:100156449%09red/ssc:100524008%09red
Adipocytokine signaling pathway	KEGG PATHWAY	ssc04920	1	70	0.860659	0.997172	ENSSSCG00000009815	ssc:100157312|	100157312|	CAMKK2|	http://www.genome.jp/kegg-bin/show_pathway?ssc04920/ssc:100157312%09red
Adherens junction	KEGG PATHWAY	ssc04520	1	71	0.864479	0.997172	ENSSSCG00000013564	ssc:396755|	396755|	INSR|	http://www.genome.jp/kegg-bin/show_pathway?ssc04520/ssc:396755%09red
B cell receptor signaling pathway	KEGG PATHWAY	ssc04662	1	72	0.868195	0.997172	ENSSSCG00000002383	ssc:100144486|	100144486|	FOS, c-fos|	http://www.genome.jp/kegg-bin/show_pathway?ssc04662/ssc:100144486%09red
Ras signaling pathway	KEGG PATHWAY	ssc04014	4	223	0.870967	0.997172	ENSSSCG00000013033|ENSSSCG00000028092|ENSSSCG00000013564|ENSSSCG00000013023	ssc:100521065|ssc:100524008|ssc:396755|ssc:100626093|	100521065|100524008|396755|100626093|	BAD| |INSR|RASGRP2|	http://www.genome.jp/kegg-bin/show_pathway?ssc04014/ssc:100626093%09red/ssc:396755%09red/ssc:100524008%09red/ssc:100521065%09red
Spliceosome	KEGG PATHWAY	ssc03040	2	129	0.876672	0.997172	ENSSSCG00000000288|ENSSSCG00000023216	ssc:768103|ssc:102158859|	768103|102158859|	HNRNPA1, HNRPA1, ROA1| |	http://www.genome.jp/kegg-bin/show_pathway?ssc03040/ssc:102158859%09red/ssc:768103%09red
Calcium signaling pathway	KEGG PATHWAY	ssc04020	3	182	0.884461	0.997172	ENSSSCG00000029451|ENSSSCG00000027550|ENSSSCG00000012411	ssc:100521662|ssc:100627099|ssc:100525092|	100521662|100627099|100525092|	|PLCD1| |	http://www.genome.jp/kegg-bin/show_pathway?ssc04020/ssc:100627099%09red/ssc:100525092%09red/ssc:100521662%09red
Herpes simplex infection	KEGG PATHWAY	ssc05168	3	182	0.884461	0.997172	ENSSSCG00000022774|ENSSSCG00000006954|ENSSSCG00000002383	ssc:100624752|ssc:100737048|ssc:100144486|	100624752|100737048|100144486|	GLTSCR2|EEF1D|FOS, c-fos|	http://www.genome.jp/kegg-bin/show_pathway?ssc05168/ssc:100737048%09red/ssc:100624752%09red/ssc:100144486%09red
Platelet activation	KEGG PATHWAY	ssc04611	2	132	0.884508	0.997172	ENSSSCG00000022820|ENSSSCG00000013023	ssc:100620246|ssc:100626093|	100620246|100626093|	VAMP8|RASGRP2|	http://www.genome.jp/kegg-bin/show_pathway?ssc04611/ssc:100626093%09red/ssc:100620246%09red
FoxO signaling pathway	KEGG PATHWAY	ssc04068	2	133	0.887016	0.997172	ENSSSCG00000013643|ENSSSCG00000013564	ssc:100525560|ssc:396755|	100525560|396755|	CDKN2D|INSR|	http://www.genome.jp/kegg-bin/show_pathway?ssc04068/ssc:396755%09red/ssc:100525560%09red
Protein digestion and absorption	KEGG PATHWAY	ssc04974	1	80	0.894484	0.997172	ENSSSCG00000029323	ssc:397168|	397168|	KCNE3|	http://www.genome.jp/kegg-bin/show_pathway?ssc04974/ssc:397168%09red
mRNA surveillance pathway	KEGG PATHWAY	ssc03015	1	84	0.905594	0.997172	ENSSSCG00000022828	ssc:100526149|	100526149|	PNN|	http://www.genome.jp/kegg-bin/show_pathway?ssc03015/ssc:100526149%09red
Progesterone-mediated oocyte maturation	KEGG PATHWAY	ssc04914	1	85	0.908184	0.997172	ENSSSCG00000025719	ssc:100620851|	100620851|	|	http://www.genome.jp/kegg-bin/show_pathway?ssc04914/ssc:100620851%09red
ErbB signaling pathway	KEGG PATHWAY	ssc04012	1	85	0.908184	0.997172	ENSSSCG00000013033	ssc:100521065|	100521065|	BAD|	http://www.genome.jp/kegg-bin/show_pathway?ssc04012/ssc:100521065%09red
GABAergic synapse	KEGG PATHWAY	ssc04727	1	85	0.908184	0.997172	ENSSSCG00000028092	ssc:100524008|	100524008|	|	http://www.genome.jp/kegg-bin/show_pathway?ssc04727/ssc:100524008%09red
Focal adhesion	KEGG PATHWAY	ssc04510	3	194	0.908272	0.997172	ENSSSCG00000013033|ENSSSCG00000016174|ENSSSCG00000016009	ssc:100521065|ssc:397620|ssc:100521477|	100521065|397620|100521477|	BAD|FN1|ITGA4|	http://www.genome.jp/kegg-bin/show_pathway?ssc04510/ssc:397620%09red/ssc:100521065%09red/ssc:100521477%09red
Regulation of actin cytoskeleton	KEGG PATHWAY	ssc04810	3	198	0.915163	0.997172	ENSSSCG00000016174|ENSSSCG00000016009|ENSSSCG00000023329	ssc:397620|ssc:100521477|ssc:100579172|	397620|100521477|100579172|	FN1|ITGA4|APC2|	http://www.genome.jp/kegg-bin/show_pathway?ssc04810/ssc:397620%09red/ssc:100579172%09red/ssc:100521477%09red
Gap junction	KEGG PATHWAY	ssc04540	1	90	0.920108	0.997172	ENSSSCG00000004241	ssc:100518636|	100518636|	GJA1, CX43|	http://www.genome.jp/kegg-bin/show_pathway?ssc04540/ssc:100518636%09red
RNA transport	KEGG PATHWAY	ssc03013	2	149	0.920847	0.997172	ENSSSCG00000022828|ENSSSCG00000003612	ssc:100526149|ssc:100521499|	100526149|100521499|	PNN|EIF3I|	http://www.genome.jp/kegg-bin/show_pathway?ssc03013/ssc:100526149%09red/ssc:100521499%09red
Rap1 signaling pathway	KEGG PATHWAY	ssc04015	3	208	0.930376	0.997172	ENSSSCG00000014039|ENSSSCG00000013564|ENSSSCG00000013023	ssc:100524790|ssc:396755|ssc:100626093|	100524790|396755|100626093|	RGS14|INSR|RASGRP2|	http://www.genome.jp/kegg-bin/show_pathway?ssc04015/ssc:100626093%09red/ssc:100524790%09red/ssc:396755%09red
Melanogenesis	KEGG PATHWAY	ssc04916	1	95	0.930485	0.997172	ENSSSCG00000000759	ssc:100516268|	100516268|	WNT5B|	http://www.genome.jp/kegg-bin/show_pathway?ssc04916/ssc:100516268%09red
Retrograde endocannabinoid signaling	KEGG PATHWAY	ssc04723	1	95	0.930485	0.997172	ENSSSCG00000028092	ssc:100524008|	100524008|	|	http://www.genome.jp/kegg-bin/show_pathway?ssc04723/ssc:100524008%09red
Estrogen signaling pathway	KEGG PATHWAY	ssc04915	1	97	0.934249	0.997172	ENSSSCG00000002383	ssc:100144486|	100144486|	FOS, c-fos|	http://www.genome.jp/kegg-bin/show_pathway?ssc04915/ssc:100144486%09red
Oxytocin signaling pathway	KEGG PATHWAY	ssc04921	2	161	0.939697	0.997172	ENSSSCG00000002383|ENSSSCG00000009815	ssc:100144486|ssc:100157312|	100144486|100157312|	FOS, c-fos|CAMKK2|	http://www.genome.jp/kegg-bin/show_pathway?ssc04921/ssc:100157312%09red/ssc:100144486%09red
Toll-like receptor signaling pathway	KEGG PATHWAY	ssc04620	1	101	0.941177	0.997172	ENSSSCG00000002383	ssc:100144486|	100144486|	FOS, c-fos|	http://www.genome.jp/kegg-bin/show_pathway?ssc04620/ssc:100144486%09red
cGMP-PKG signaling pathway	KEGG PATHWAY	ssc04022	2	167	0.947442	0.997172	ENSSSCG00000013033|ENSSSCG00000013564	ssc:100521065|ssc:396755|	100521065|396755|	BAD|INSR|	http://www.genome.jp/kegg-bin/show_pathway?ssc04022/ssc:396755%09red/ssc:100521065%09red
Cytokine-cytokine receptor interaction	KEGG PATHWAY	ssc04060	3	223	0.948545	0.997172	ENSSSCG00000015488|ENSSSCG00000026872|ENSSSCG00000016183	ssc:574053|ssc:100127162|ssc:100124654|	574053|100127162|100124654|	TNFSF4, OX40L, TNFRSF4|APRIL|CXCR2, IL8RB|	http://www.genome.jp/kegg-bin/show_pathway?ssc04060/ssc:100127162%09red/ssc:100124654%09red/ssc:574053%09red
Influenza A	KEGG PATHWAY	ssc05164	2	168	0.948637	0.997172	ENSSSCG00000015570|ENSSSCG00000015114	ssc:100302027|ssc:100518678|	100302027|100518678|	IVNS1ABP|NLRX1|	http://www.genome.jp/kegg-bin/show_pathway?ssc05164/ssc:100302027%09red/ssc:100518678%09red
T cell receptor signaling pathway	KEGG PATHWAY	ssc04660	1	107	0.950226	0.997172	ENSSSCG00000002383	ssc:100144486|	100144486|	FOS, c-fos|	http://www.genome.jp/kegg-bin/show_pathway?ssc04660/ssc:100144486%09red
Oocyte meiosis	KEGG PATHWAY	ssc04114	1	107	0.950226	0.997172	ENSSSCG00000025719	ssc:100620851|	100620851|	|	http://www.genome.jp/kegg-bin/show_pathway?ssc04114/ssc:100620851%09red
PI3K-Akt signaling pathway	KEGG PATHWAY	ssc04151	5	328	0.951744	0.997172	ENSSSCG00000013033|ENSSSCG00000016174|ENSSSCG00000016009|ENSSSCG00000013564|ENSSSCG00000028092	ssc:100521065|ssc:397620|ssc:100521477|ssc:396755|ssc:100524008|	100521065|397620|100521477|396755|100524008|	BAD|FN1|ITGA4|INSR| |	http://www.genome.jp/kegg-bin/show_pathway?ssc04151/ssc:397620%09red/ssc:396755%09red/ssc:100524008%09red/ssc:100521065%09red/ssc:100521477%09red
TNF signaling pathway	KEGG PATHWAY	ssc04668	1	109	0.952922	0.997172	ENSSSCG00000002383	ssc:100144486|	100144486|	FOS, c-fos|	http://www.genome.jp/kegg-bin/show_pathway?ssc04668/ssc:100144486%09red
MicroRNAs in cancer	KEGG PATHWAY	ssc05206	3	228	0.953548	0.997172	ENSSSCG00000023329|ENSSSCG00000007268|ENSSSCG00000004570	ssc:100579172|ssc:100153846|ssc:100037999|	100579172|100153846|100037999|	APC2|E2F1|TPM1|	http://www.genome.jp/kegg-bin/show_pathway?ssc05206/ssc:100037999%09red/ssc:100153846%09red/ssc:100579172%09red
Serotonergic synapse	KEGG PATHWAY	ssc04726	1	112	0.956696	0.997172	ENSSSCG00000028092	ssc:100524008|	100524008|	|	http://www.genome.jp/kegg-bin/show_pathway?ssc04726/ssc:100524008%09red
Toxoplasmosis	KEGG PATHWAY	ssc05145	1	115	0.960167	0.997172	ENSSSCG00000013033	ssc:100521065|	100521065|	BAD|	http://www.genome.jp/kegg-bin/show_pathway?ssc05145/ssc:100521065%09red
Vascular smooth muscle contraction	KEGG PATHWAY	ssc04270	1	117	0.962325	0.997172	ENSSSCG00000023212	ssc:397610|	397610|	PPP1R14A, CPI17|	http://www.genome.jp/kegg-bin/show_pathway?ssc04270/ssc:397610%09red
Leukocyte transendothelial migration	KEGG PATHWAY	ssc04670	1	119	0.964367	0.997172	ENSSSCG00000016009	ssc:100521477|	100521477|	ITGA4|	http://www.genome.jp/kegg-bin/show_pathway?ssc04670/ssc:100521477%09red
Hepatitis C	KEGG PATHWAY	ssc05160	1	127	0.971487	0.997172	ENSSSCG00000013033	ssc:100521065|	100521065|	BAD|	http://www.genome.jp/kegg-bin/show_pathway?ssc05160/ssc:100521065%09red
Tight junction	KEGG PATHWAY	ssc04530	1	129	0.973033	0.997172	ENSSSCG00000006564	ssc:100154707|	100154707|	RAB13|	http://www.genome.jp/kegg-bin/show_pathway?ssc04530/ssc:100154707%09red
Measles	KEGG PATHWAY	ssc05162	1	133	0.975878	0.997172	ENSSSCG00000003112	ssc:100517403|	100517403|	BBC3|	http://www.genome.jp/kegg-bin/show_pathway?ssc05162/ssc:100517403%09red
cAMP signaling pathway	KEGG PATHWAY	ssc04024	2	201	0.976259	0.997172	ENSSSCG00000013033|ENSSSCG00000002383	ssc:100521065|ssc:100144486|	100521065|100144486|	BAD|FOS, c-fos|	http://www.genome.jp/kegg-bin/show_pathway?ssc04024/ssc:100144486%09red/ssc:100521065%09red
Adrenergic signaling in cardiomyocytes	KEGG PATHWAY	ssc04261	1	141	0.9807	0.997172	ENSSSCG00000004570	ssc:100037999|	100037999|	TPM1|	http://www.genome.jp/kegg-bin/show_pathway?ssc04261/ssc:100037999%09red
Cell adhesion molecules (CAMs)	KEGG PATHWAY	ssc04514	1	146	0.983212	0.997172	ENSSSCG00000016009	ssc:100521477|	100521477|	ITGA4|	http://www.genome.jp/kegg-bin/show_pathway?ssc04514/ssc:100521477%09red
Transcriptional misregulation in cancer	KEGG PATHWAY	ssc05202	1	156	0.987299	0.997172	ENSSSCG00000028829	ssc:100154511|	100154511|	HIST1H3E|	http://www.genome.jp/kegg-bin/show_pathway?ssc05202/ssc:100154511%09red
Epstein-Barr virus infection	KEGG PATHWAY	ssc05169	1	189	0.994946	0.999446	ENSSSCG00000021472	ssc:100623333|	100623333|	POLR2E|	http://www.genome.jp/kegg-bin/show_pathway?ssc05169/ssc:100623333%09red
Neuroactive ligand-receptor interaction	KEGG PATHWAY	ssc04080	1	268	0.999446	0.999446	ENSSSCG00000027849	ssc:100621002|	100621002|	CNR2|	http://www.genome.jp/kegg-bin/show_pathway?ssc04080/ssc:100621002%09red
--------------------
#Term	Database	ID	Input number	Background number	P-Value	Corrected P-Value	Input	KO	Entrez_ID	KO_name	Hyperlink
--------------------
#Term	Database	ID	Input number	Background number	P-Value	Corrected P-Value	Input	KO	Entrez_ID	KO_name	Hyperlink
--------------------
