# Supplementary material for: The long non-coding RNA LNC_000397 negatively regulates PRRSV replication through induction of interferon-stimulated genes
Source: Virol J. 2022 Mar 5;19:40. doi: 10.1186/s12985-022-01761-x (PMC8897765; doi:10.1186/s12985-022-01761-x)
Supplement: Supplementary file 6 — Additional file 6: Table S5 Lists KEGG pathway enrichment of mRNAs co-localized with differently expressed lncRNAs in GSWW and VR2332 infected groups. [file 12985_2022_1761_MOESM6_ESM.xlsx]

## Sheet: GSWW Up
##Databases: KEGG PATHWAY
##Statistical test method: hypergeometric test / Fisher's exact test
##FDR correction method: Benjamini and Hochberg
#Term	Database	ID	Input number	Background number	P-Value	Corrected P-Value	Input	KO	Entrez_ID	KO_name	Hyperlink
Inflammatory bowel disease (IBD)	KEGG PATHWAY	ssc05321	5	62	0.00158472	0.201559	ENSSSCG00000023016|ENSSSCG00000016058|ENSSSCG00000030957|ENSSSCG00000016057|ENSSSCG00000021437	ssc:397261|ssc:396655|ssc:751869|ssc:396655|ssc:397261|	397261|396655|751869|396655|397261|	STAT4|STAT1|NFKB1|STAT1|STAT4|	http://www.genome.jp/kegg-bin/show_pathway?ssc05321/ssc:396655%09red/ssc:751869%09red/ssc:397261%09red
Ribosome	KEGG PATHWAY	ssc03010	7	143	0.00303096	0.201559	ENSSSCG00000011272|ENSSSCG00000016344|ENSSSCG00000015503|ENSSSCG00000001696|ENSSSCG00000024107|ENSSSCG00000024693|ENSSSCG00000005209	ssc:100037994|ssc:102158964|ssc:100739774|ssc:100157118|ssc:100037994|ssc:100512482|ssc:100038023|	100037994|102158964|100739774|100157118|100037994|100512482|100038023|	RPL14| |MRPS14|MRPL14|RPL14|MRPL17|RPS6|	http://www.genome.jp/kegg-bin/show_pathway?ssc03010/ssc:102158964%09red/ssc:100512482%09red/ssc:100037994%09red/ssc:100739774%09red/ssc:100038023%09red/ssc:100157118%09red
Pancreatic cancer	KEGG PATHWAY	ssc05212	4	63	0.0102568	0.341038	ENSSSCG00000016058|ENSSSCG00000030957|ENSSSCG00000029741|ENSSSCG00000016057	ssc:396655|ssc:751869|ssc:100622254|ssc:396655|	396655|751869|100622254|396655|	STAT1|NFKB1|RALA|STAT1|	http://www.genome.jp/kegg-bin/show_pathway?ssc05212/ssc:100622254%09red/ssc:396655%09red/ssc:751869%09red
Leishmaniasis	KEGG PATHWAY	ssc05140	4	63	0.0102568	0.341038	ENSSSCG00000016058|ENSSSCG00000017755|ENSSSCG00000030957|ENSSSCG00000016057	ssc:396655|ssc:396859|ssc:751869|ssc:396655|	396655|396859|751869|396655|	STAT1|NOS2, INOS, NOS2a|NFKB1|STAT1|	http://www.genome.jp/kegg-bin/show_pathway?ssc05140/ssc:396655%09red/ssc:751869%09red/ssc:396859%09red
Hepatitis B	KEGG PATHWAY	ssc05161	6	151	0.0149542	0.379483	ENSSSCG00000023016|ENSSSCG00000010224|ENSSSCG00000016058|ENSSSCG00000021437|ENSSSCG00000030957|ENSSSCG00000016057	ssc:397261|ssc:100038004|ssc:396655|ssc:397261|ssc:751869|ssc:396655|	397261|100038004|396655|397261|751869|396655|	STAT4|EGR2|STAT1|STAT4|NFKB1|STAT1|	http://www.genome.jp/kegg-bin/show_pathway?ssc05161/ssc:396655%09red/ssc:751869%09red/ssc:100038004%09red/ssc:397261%09red
Thyroid hormone signaling pathway	KEGG PATHWAY	ssc04919	5	113	0.0171195	0.379483	ENSSSCG00000025418|ENSSSCG00000011714|ENSSSCG00000016058|ENSSSCG00000023787|ENSSSCG00000016057	ssc:100524586|ssc:100524586|ssc:396655|ssc:100524586|ssc:396655|	100524586|100524586|396655|100524586|396655|	MED12L|MED12L|STAT1|MED12L|STAT1|	http://www.genome.jp/kegg-bin/show_pathway?ssc04919/ssc:396655%09red/ssc:100524586%09red
Platelet activation	KEGG PATHWAY	ssc04611	5	132	0.030219	0.516104	ENSSSCG00000017872|ENSSSCG00000005285|ENSSSCG00000017908|ENSSSCG00000015580|ENSSSCG00000025095	ssc:100739675|ssc:654405|ssc:100515052|ssc:100520687|ssc:397190|	100739675|654405|100515052|100520687|397190|	|GNAQ|GP1BA, GPIBA|PLA2G4A|PPP1R12A, MYPT1|	http://www.genome.jp/kegg-bin/show_pathway?ssc04611/ssc:397190%09red/ssc:100520687%09red/ssc:100739675%09red/ssc:100515052%09red/ssc:654405%09red
Measles	KEGG PATHWAY	ssc05162	5	133	0.0310438	0.516104	ENSSSCG00000006380|ENSSSCG00000016058|ENSSSCG00000025181|ENSSSCG00000030957|ENSSSCG00000016057	ssc:100511325|ssc:396655|ssc:100523731|ssc:751869|ssc:396655|	100511325|396655|100523731|751869|396655|	SLAMF1|STAT1| |NFKB1|STAT1|	http://www.genome.jp/kegg-bin/show_pathway?ssc05162/ssc:100523731%09red/ssc:396655%09red/ssc:100511325%09red/ssc:751869%09red
HIF-1 signaling pathway	KEGG PATHWAY	ssc04066	4	104	0.0482521	0.672167	ENSSSCG00000017755|ENSSSCG00000017904|ENSSSCG00000030957|ENSSSCG00000005209	ssc:396859|ssc:692156|ssc:751869|ssc:100038023|	396859|692156|751869|100038023|	NOS2, INOS, NOS2a|ENO3|NFKB1|RPS6|	http://www.genome.jp/kegg-bin/show_pathway?ssc04066/ssc:100038023%09red/ssc:692156%09red/ssc:751869%09red/ssc:396859%09red
Jak-STAT signaling pathway	KEGG PATHWAY	ssc04630	5	153	0.0505389	0.672167	ENSSSCG00000023016|ENSSSCG00000016058|ENSSSCG00000016057|ENSSSCG00000021437|ENSSSCG00000026816	ssc:397261|ssc:396655|ssc:396655|ssc:397261|ssc:100620540|	397261|396655|396655|397261|100620540|	STAT4|STAT1|STAT1|STAT4| |	http://www.genome.jp/kegg-bin/show_pathway?ssc04630/ssc:396655%09red/ssc:100620540%09red/ssc:397261%09red
Prolactin signaling pathway	KEGG PATHWAY	ssc04917	3	67	0.0588745	0.691339	ENSSSCG00000016058|ENSSSCG00000030957|ENSSSCG00000016057	ssc:396655|ssc:751869|ssc:396655|	396655|751869|396655|	STAT1|NFKB1|STAT1|	http://www.genome.jp/kegg-bin/show_pathway?ssc04917/ssc:396655%09red/ssc:751869%09red
Toxoplasmosis	KEGG PATHWAY	ssc05145	4	115	0.064375	0.691339	ENSSSCG00000016058|ENSSSCG00000017755|ENSSSCG00000030957|ENSSSCG00000016057	ssc:396655|ssc:396859|ssc:751869|ssc:396655|	396655|396859|751869|396655|	STAT1|NOS2, INOS, NOS2a|NFKB1|STAT1|	http://www.genome.jp/kegg-bin/show_pathway?ssc05145/ssc:396655%09red/ssc:751869%09red/ssc:396859%09red
Vascular smooth muscle contraction	KEGG PATHWAY	ssc04270	4	117	0.0675745	0.691339	ENSSSCG00000025095|ENSSSCG00000005285|ENSSSCG00000015580|ENSSSCG00000008444	ssc:397190|ssc:654405|ssc:100520687|ssc:100524932|	397190|654405|100520687|100524932|	PPP1R12A, MYPT1|GNAQ|PLA2G4A|PRKCE|	http://www.genome.jp/kegg-bin/show_pathway?ssc04270/ssc:100524932%09red/ssc:654405%09red/ssc:100520687%09red/ssc:397190%09red
Tuberculosis	KEGG PATHWAY	ssc05152	5	174	0.0772697	0.707121	ENSSSCG00000016058|ENSSSCG00000017755|ENSSSCG00000030957|ENSSSCG00000017753|ENSSSCG00000016057	ssc:396655|ssc:396859|ssc:751869|ssc:100511282|ssc:396655|	396655|396859|751869|100511282|396655|	STAT1|NOS2, INOS, NOS2a|NFKB1|KSR1|STAT1|	http://www.genome.jp/kegg-bin/show_pathway?ssc05152/ssc:396655%09red/ssc:100511282%09red/ssc:751869%09red/ssc:396859%09red
Hepatitis C	KEGG PATHWAY	ssc05160	4	127	0.0847716	0.707121	ENSSSCG00000016058|ENSSSCG00000025181|ENSSSCG00000030957|ENSSSCG00000016057	ssc:396655|ssc:100523731|ssc:751869|ssc:396655|	396655|100523731|751869|396655|	STAT1| |NFKB1|STAT1|	http://www.genome.jp/kegg-bin/show_pathway?ssc05160/ssc:100523731%09red/ssc:396655%09red/ssc:751869%09red
Herpes simplex infection	KEGG PATHWAY	ssc05168	5	182	0.08912	0.707121	ENSSSCG00000016058|ENSSSCG00000025181|ENSSSCG00000030957|ENSSSCG00000016057|ENSSSCG00000026816	ssc:396655|ssc:100523731|ssc:751869|ssc:396655|ssc:100620540|	396655|100523731|751869|396655|100620540|	STAT1| |NFKB1|STAT1| |	http://www.genome.jp/kegg-bin/show_pathway?ssc05168/ssc:100523731%09red/ssc:396655%09red/ssc:100620540%09red/ssc:751869%09red
Salmonella infection	KEGG PATHWAY	ssc05132	3	81	0.0903839	0.707121	ENSSSCG00000017905|ENSSSCG00000017755|ENSSSCG00000030957	ssc:100512494|ssc:396859|ssc:751869|	100512494|396859|751869|	PFN1|NOS2, INOS, NOS2a|NFKB1|	http://www.genome.jp/kegg-bin/show_pathway?ssc05132/ssc:100512494%09red/ssc:751869%09red/ssc:396859%09red
Taurine and hypotaurine metabolism	KEGG PATHWAY	ssc00430	1	8	0.108133	0.798986	ENSSSCG00000010223	ssc:100153304|	100153304|	ADO|	http://www.genome.jp/kegg-bin/show_pathway?ssc00430/ssc:100153304%09red
Cocaine addiction	KEGG PATHWAY	ssc05030	2	46	0.123028	0.829421	ENSSSCG00000017730|ENSSSCG00000030957	ssc:100113467|ssc:751869|	100113467|751869|	CDK5R1|NFKB1|	http://www.genome.jp/kegg-bin/show_pathway?ssc05030/ssc:100113467%09red/ssc:751869%09red
Toll-like receptor signaling pathway	KEGG PATHWAY	ssc04620	3	101	0.144696	0.829421	ENSSSCG00000016058|ENSSSCG00000030957|ENSSSCG00000016057	ssc:396655|ssc:751869|ssc:396655|	396655|751869|396655|	STAT1|NFKB1|STAT1|	http://www.genome.jp/kegg-bin/show_pathway?ssc04620/ssc:396655%09red/ssc:751869%09red
Amoebiasis	KEGG PATHWAY	ssc05146	3	107	0.162699	0.829421	ENSSSCG00000005285|ENSSSCG00000017755|ENSSSCG00000030957	ssc:654405|ssc:396859|ssc:751869|	654405|396859|751869|	GNAQ|NOS2, INOS, NOS2a|NFKB1|	http://www.genome.jp/kegg-bin/show_pathway?ssc05146/ssc:654405%09red/ssc:751869%09red/ssc:396859%09red
Ras signaling pathway	KEGG PATHWAY	ssc04014	5	223	0.162986	0.829421	ENSSSCG00000015580|ENSSSCG00000026816|ENSSSCG00000030957|ENSSSCG00000029741|ENSSSCG00000017753	ssc:100520687|ssc:100620540|ssc:751869|ssc:100622254|ssc:100511282|	100520687|100620540|751869|100622254|100511282|	PLA2G4A| |NFKB1|RALA|KSR1|	http://www.genome.jp/kegg-bin/show_pathway?ssc04014/ssc:100622254%09red/ssc:100520687%09red/ssc:100511282%09red/ssc:751869%09red/ssc:100620540%09red
Chagas disease (American trypanosomiasis)	KEGG PATHWAY	ssc05142	3	108	0.165763	0.829421	ENSSSCG00000005285|ENSSSCG00000017755|ENSSSCG00000030957	ssc:654405|ssc:396859|ssc:751869|	654405|396859|751869|	GNAQ|NOS2, INOS, NOS2a|NFKB1|	http://www.genome.jp/kegg-bin/show_pathway?ssc05142/ssc:654405%09red/ssc:751869%09red/ssc:396859%09red
Inflammatory mediator regulation of TRP channels	KEGG PATHWAY	ssc04750	3	110	0.171941	0.829421	ENSSSCG00000005285|ENSSSCG00000015580|ENSSSCG00000008444	ssc:654405|ssc:100520687|ssc:100524932|	654405|100520687|100524932|	GNAQ|PLA2G4A|PRKCE|	http://www.genome.jp/kegg-bin/show_pathway?ssc04750/ssc:100524932%09red/ssc:654405%09red/ssc:100520687%09red
Influenza A	KEGG PATHWAY	ssc05164	4	168	0.173695	0.829421	ENSSSCG00000016058|ENSSSCG00000025181|ENSSSCG00000030957|ENSSSCG00000016057	ssc:396655|ssc:100523731|ssc:751869|ssc:396655|	396655|100523731|751869|396655|	STAT1| |NFKB1|STAT1|	http://www.genome.jp/kegg-bin/show_pathway?ssc05164/ssc:100523731%09red/ssc:396655%09red/ssc:751869%09red
Long-term depression	KEGG PATHWAY	ssc04730	2	59	0.180038	0.829421	ENSSSCG00000005285|ENSSSCG00000015580	ssc:654405|ssc:100520687|	654405|100520687|	GNAQ|PLA2G4A|	http://www.genome.jp/kegg-bin/show_pathway?ssc04730/ssc:654405%09red/ssc:100520687%09red
mTOR signaling pathway	KEGG PATHWAY	ssc04150	2	60	0.184582	0.829421	ENSSSCG00000003558|ENSSSCG00000005209	ssc:100523972|ssc:100038023|	100523972|100038023|	RPS6KA1|RPS6|	http://www.genome.jp/kegg-bin/show_pathway?ssc04150/ssc:100038023%09red/ssc:100523972%09red
Chemokine signaling pathway	KEGG PATHWAY	ssc04062	4	173	0.186206	0.829421	ENSSSCG00000016058|ENSSSCG00000030957|ENSSSCG00000016057|ENSSSCG00000008694	ssc:396655|ssc:751869|ssc:396655|ssc:100519668|	396655|751869|396655|100519668|	STAT1|NFKB1|STAT1|GRK4|	http://www.genome.jp/kegg-bin/show_pathway?ssc04062/ssc:396655%09red/ssc:100519668%09red/ssc:751869%09red
Selenocompound metabolism	KEGG PATHWAY	ssc00450	1	16	0.194425	0.829421	ENSSSCG00000000843	ssc:396681|	396681|	TXNRD1, TRXR1|	http://www.genome.jp/kegg-bin/show_pathway?ssc00450/ssc:396681%09red
Neurotrophin signaling pathway	KEGG PATHWAY	ssc04722	3	118	0.19727	0.829421	ENSSSCG00000003558|ENSSSCG00000030957|ENSSSCG00000026816	ssc:100523972|ssc:751869|ssc:100620540|	100523972|751869|100620540|	RPS6KA1|NFKB1| |	http://www.genome.jp/kegg-bin/show_pathway?ssc04722/ssc:100620540%09red/ssc:751869%09red/ssc:100523972%09red
Other glycan degradation	KEGG PATHWAY	ssc00511	1	17	0.204609	0.829421	ENSSSCG00000009166	ssc:100524511|	100524511|	|	http://www.genome.jp/kegg-bin/show_pathway?ssc00511/ssc:100524511%09red
MAPK signaling pathway	KEGG PATHWAY	ssc04010	5	249	0.219247	0.829421	ENSSSCG00000007151|ENSSSCG00000003558|ENSSSCG00000030957|ENSSSCG00000015580|ENSSSCG00000006074	ssc:100329127|ssc:100523972|ssc:751869|ssc:100520687|ssc:100524741|	100329127|100523972|751869|100520687|100524741|	CDC25B|RPS6KA1|NFKB1|PLA2G4A|STK3|	http://www.genome.jp/kegg-bin/show_pathway?ssc04010/ssc:100520687%09red/ssc:751869%09red/ssc:100524741%09red/ssc:100523972%09red/ssc:100329127%09red
Long-term potentiation	KEGG PATHWAY	ssc04720	2	68	0.221429	0.829421	ENSSSCG00000003558|ENSSSCG00000005285	ssc:100523972|ssc:654405|	100523972|654405|	RPS6KA1|GNAQ|	http://www.genome.jp/kegg-bin/show_pathway?ssc04720/ssc:654405%09red/ssc:100523972%09red
Terpenoid backbone biosynthesis	KEGG PATHWAY	ssc00900	1	19	0.224594	0.829421	ENSSSCG00000025057	ssc:100524683|	100524683|	DHDDS|	http://www.genome.jp/kegg-bin/show_pathway?ssc00900/ssc:100524683%09red
Glycosaminoglycan degradation	KEGG PATHWAY	ssc00531	1	19	0.224594	0.829421	ENSSSCG00000012731	ssc:100512880|	100512880|	IDS|	http://www.genome.jp/kegg-bin/show_pathway?ssc00531/ssc:100512880%09red
Chronic myeloid leukemia	KEGG PATHWAY	ssc05220	2	69	0.226082	0.829421	ENSSSCG00000030957|ENSSSCG00000026816	ssc:751869|ssc:100620540|	751869|100620540|	NFKB1| |	http://www.genome.jp/kegg-bin/show_pathway?ssc05220/ssc:100620540%09red/ssc:751869%09red
Adipocytokine signaling pathway	KEGG PATHWAY	ssc04920	2	70	0.230741	0.829421	ENSSSCG00000030957|ENSSSCG00000026816	ssc:751869|ssc:100620540|	751869|100620540|	NFKB1| |	http://www.genome.jp/kegg-bin/show_pathway?ssc04920/ssc:100620540%09red/ssc:751869%09red
Pertussis	KEGG PATHWAY	ssc05133	2	73	0.244753	0.841127	ENSSSCG00000017755|ENSSSCG00000030957	ssc:396859|ssc:751869|	396859|751869|	NOS2, INOS, NOS2a|NFKB1|	http://www.genome.jp/kegg-bin/show_pathway?ssc05133/ssc:751869%09red/ssc:396859%09red
Osteoclast differentiation	KEGG PATHWAY	ssc04380	3	133	0.24684	0.841127	ENSSSCG00000016058|ENSSSCG00000030957|ENSSSCG00000016057	ssc:396655|ssc:751869|ssc:396655|	396655|751869|396655|	STAT1|NFKB1|STAT1|	http://www.genome.jp/kegg-bin/show_pathway?ssc04380/ssc:396655%09red/ssc:751869%09red
alpha-Linolenic acid metabolism	KEGG PATHWAY	ssc00592	1	22	0.253637	0.841127	ENSSSCG00000015580	ssc:100520687|	100520687|	PLA2G4A|	http://www.genome.jp/kegg-bin/show_pathway?ssc00592/ssc:100520687%09red
Pentose phosphate pathway	KEGG PATHWAY	ssc00030	1	23	0.263075	0.841127	ENSSSCG00000013878	ssc:100517636|	100517636|	PGLS|	http://www.genome.jp/kegg-bin/show_pathway?ssc00030/ssc:100517636%09red
Rap1 signaling pathway	KEGG PATHWAY	ssc04015	4	208	0.280301	0.841127	ENSSSCG00000008495|ENSSSCG00000017905|ENSSSCG00000005285|ENSSSCG00000029741	ssc:100523181|ssc:100512494|ssc:654405|ssc:100622254|	100523181|100512494|654405|100622254|	PRKD3|PFN1|GNAQ|RALA|	http://www.genome.jp/kegg-bin/show_pathway?ssc04015/ssc:100622254%09red/ssc:100512494%09red/ssc:654405%09red/ssc:100523181%09red
ECM-receptor interaction	KEGG PATHWAY	ssc04512	2	82	0.286894	0.841127	ENSSSCG00000022204|ENSSSCG00000017908	ssc:100623869|ssc:100515052|	100623869|100515052|	AGRN|GP1BA, GPIBA|	http://www.genome.jp/kegg-bin/show_pathway?ssc04512/ssc:100623869%09red/ssc:100515052%09red
Cell adhesion molecules (CAMs)	KEGG PATHWAY	ssc04514	3	146	0.291177	0.841127	ENSSSCG00000005210|ENSSSCG00000005211|ENSSSCG00000023028	ssc:574057|ssc:574058|ssc:100621244|	574057|574058|100621244|	PDCD1LG2, PDL2|CD274, PDL1|JAM2|	http://www.genome.jp/kegg-bin/show_pathway?ssc04514/ssc:574057%09red/ssc:574058%09red/ssc:100621244%09red
Progesterone-mediated oocyte maturation	KEGG PATHWAY	ssc04914	2	85	0.300909	0.841127	ENSSSCG00000007151|ENSSSCG00000003558	ssc:100329127|ssc:100523972|	100329127|100523972|	CDC25B|RPS6KA1|	http://www.genome.jp/kegg-bin/show_pathway?ssc04914/ssc:100523972%09red/ssc:100329127%09red
GnRH signaling pathway	KEGG PATHWAY	ssc04912	2	86	0.30557	0.841127	ENSSSCG00000005285|ENSSSCG00000015580	ssc:654405|ssc:100520687|	654405|100520687|	GNAQ|PLA2G4A|	http://www.genome.jp/kegg-bin/show_pathway?ssc04912/ssc:654405%09red/ssc:100520687%09red
Parkinson's disease	KEGG PATHWAY	ssc05012	3	151	0.308401	0.841127	ENSSSCG00000003334|ENSSSCG00000011393|ENSSSCG00000022586	ssc:100523610|ssc:100512631|ssc:100621056|	100523610|100512631|100621056|	UBE2J2|UBA7| |	http://www.genome.jp/kegg-bin/show_pathway?ssc05012/ssc:100512631%09red/ssc:100523610%09red/ssc:100621056%09red
Small cell lung cancer	KEGG PATHWAY	ssc05222	2	88	0.314876	0.841127	ENSSSCG00000017755|ENSSSCG00000030957	ssc:396859|ssc:751869|	396859|751869|	NOS2, INOS, NOS2a|NFKB1|	http://www.genome.jp/kegg-bin/show_pathway?ssc05222/ssc:751869%09red/ssc:396859%09red
Other types of O-glycan biosynthesis	KEGG PATHWAY	ssc00514	1	30	0.325892	0.841127	ENSSSCG00000013883	ssc:100517457|	100517457|	GLT25D1|	http://www.genome.jp/kegg-bin/show_pathway?ssc00514/ssc:100517457%09red
Linoleic acid metabolism	KEGG PATHWAY	ssc00591	1	32	0.342839	0.841127	ENSSSCG00000015580	ssc:100520687|	100520687|	PLA2G4A|	http://www.genome.jp/kegg-bin/show_pathway?ssc00591/ssc:100520687%09red
Oxytocin signaling pathway	KEGG PATHWAY	ssc04921	3	161	0.342918	0.841127	ENSSSCG00000025095|ENSSSCG00000005285|ENSSSCG00000015580	ssc:397190|ssc:654405|ssc:100520687|	397190|654405|100520687|	PPP1R12A, MYPT1|GNAQ|PLA2G4A|	http://www.genome.jp/kegg-bin/show_pathway?ssc04921/ssc:654405%09red/ssc:100520687%09red/ssc:397190%09red
Protein processing in endoplasmic reticulum	KEGG PATHWAY	ssc04141	3	162	0.346366	0.841127	ENSSSCG00000017094|ENSSSCG00000025181|ENSSSCG00000003334	ssc:100170772|ssc:100523731|ssc:100523610|	100170772|100523731|100523610|	MARCH6| |UBE2J2|	http://www.genome.jp/kegg-bin/show_pathway?ssc04141/ssc:100523731%09red/ssc:100523610%09red/ssc:100170772%09red
African trypanosomiasis	KEGG PATHWAY	ssc05143	1	34	0.359361	0.841127	ENSSSCG00000005285	ssc:654405|	654405|	GNAQ|	http://www.genome.jp/kegg-bin/show_pathway?ssc05143/ssc:654405%09red
cGMP-PKG signaling pathway	KEGG PATHWAY	ssc04022	3	167	0.363579	0.841127	ENSSSCG00000025095|ENSSSCG00000005285|ENSSSCG00000008444	ssc:397190|ssc:654405|ssc:100524932|	397190|654405|100524932|	PPP1R12A, MYPT1|GNAQ|PRKCE|	http://www.genome.jp/kegg-bin/show_pathway?ssc04022/ssc:100524932%09red/ssc:654405%09red/ssc:397190%09red
Carbon metabolism	KEGG PATHWAY	ssc01200	2	99	0.365445	0.841127	ENSSSCG00000017904|ENSSSCG00000013878	ssc:692156|ssc:100517636|	692156|100517636|	ENO3|PGLS|	http://www.genome.jp/kegg-bin/show_pathway?ssc01200/ssc:100517636%09red/ssc:692156%09red
Pyrimidine metabolism	KEGG PATHWAY	ssc00240	2	101	0.374496	0.841127	ENSSSCG00000000843|ENSSSCG00000025783	ssc:396681|ssc:100623360|	396681|100623360|	TXNRD1, TRXR1|ENTPD3|	http://www.genome.jp/kegg-bin/show_pathway?ssc00240/ssc:396681%09red/ssc:100623360%09red
Pathways in cancer	KEGG PATHWAY	ssc05200	5	319	0.389549	0.841127	ENSSSCG00000016058|ENSSSCG00000017755|ENSSSCG00000030957|ENSSSCG00000029741|ENSSSCG00000016057	ssc:396655|ssc:396859|ssc:751869|ssc:100622254|ssc:396655|	396655|396859|751869|100622254|396655|	STAT1|NOS2, INOS, NOS2a|NFKB1|RALA|STAT1|	http://www.genome.jp/kegg-bin/show_pathway?ssc05200/ssc:100622254%09red/ssc:396655%09red/ssc:751869%09red/ssc:396859%09red
Alzheimer's disease	KEGG PATHWAY	ssc05010	3	175	0.390957	0.841127	ENSSSCG00000005285|ENSSSCG00000017730|ENSSSCG00000022586	ssc:654405|ssc:100113467|ssc:100621056|	654405|100113467|100621056|	GNAQ|CDK5R1| |	http://www.genome.jp/kegg-bin/show_pathway?ssc05010/ssc:654405%09red/ssc:100621056%09red/ssc:100113467%09red
Natural killer cell mediated cytotoxicity	KEGG PATHWAY	ssc04650	2	108	0.405739	0.841127	ENSSSCG00000026816|ENSSSCG00000006379	ssc:100620540|ssc:100511130|	100620540|100511130|	|CD48|	http://www.genome.jp/kegg-bin/show_pathway?ssc04650/ssc:100620540%09red/ssc:100511130%09red
Ether lipid metabolism	KEGG PATHWAY	ssc00565	1	41	0.413995	0.841127	ENSSSCG00000015580	ssc:100520687|	100520687|	PLA2G4A|	http://www.genome.jp/kegg-bin/show_pathway?ssc00565/ssc:100520687%09red
Calcium signaling pathway	KEGG PATHWAY	ssc04020	3	182	0.41467	0.841127	ENSSSCG00000017872|ENSSSCG00000005285|ENSSSCG00000017755	ssc:100739675|ssc:654405|ssc:396859|	100739675|654405|396859|	|GNAQ|NOS2, INOS, NOS2a|	http://www.genome.jp/kegg-bin/show_pathway?ssc04020/ssc:654405%09red/ssc:100739675%09red/ssc:396859%09red
Endocrine and other factor-regulated calcium reabsorption	KEGG PATHWAY	ssc04961	1	42	0.421412	0.841127	ENSSSCG00000005285	ssc:654405|	654405|	GNAQ|	http://www.genome.jp/kegg-bin/show_pathway?ssc04961/ssc:654405%09red
Serotonergic synapse	KEGG PATHWAY	ssc04726	2	112	0.423255	0.841127	ENSSSCG00000005285|ENSSSCG00000015580	ssc:654405|ssc:100520687|	654405|100520687|	GNAQ|PLA2G4A|	http://www.genome.jp/kegg-bin/show_pathway?ssc04726/ssc:654405%09red/ssc:100520687%09red
Lysosome	KEGG PATHWAY	ssc04142	2	115	0.436216	0.841127	ENSSSCG00000009166|ENSSSCG00000012731	ssc:100524511|ssc:100512880|	100524511|100512880|	|IDS|	http://www.genome.jp/kegg-bin/show_pathway?ssc04142/ssc:100524511%09red/ssc:100512880%09red
Viral carcinogenesis	KEGG PATHWAY	ssc05203	3	189	0.438085	0.841127	ENSSSCG00000025181|ENSSSCG00000030957|ENSSSCG00000010224	ssc:100523731|ssc:751869|ssc:100038004|	100523731|751869|100038004|	|NFKB1|EGR2|	http://www.genome.jp/kegg-bin/show_pathway?ssc05203/ssc:100523731%09red/ssc:751869%09red/ssc:100038004%09red
Epstein-Barr virus infection	KEGG PATHWAY	ssc05169	3	189	0.438085	0.841127	ENSSSCG00000025181|ENSSSCG00000030957|ENSSSCG00000025783	ssc:100523731|ssc:751869|ssc:100623360|	100523731|751869|100623360|	|NFKB1|ENTPD3|	http://www.genome.jp/kegg-bin/show_pathway?ssc05169/ssc:100523731%09red/ssc:751869%09red/ssc:100623360%09red
Huntington's disease	KEGG PATHWAY	ssc05016	3	190	0.441402	0.841127	ENSSSCG00000005285|ENSSSCG00000008697|ENSSSCG00000022586	ssc:654405|ssc:397014|ssc:100621056|	654405|397014|100621056|	GNAQ|HDH| |	http://www.genome.jp/kegg-bin/show_pathway?ssc05016/ssc:654405%09red/ssc:397014%09red/ssc:100621056%09red
Proteoglycans in cancer	KEGG PATHWAY	ssc05205	3	192	0.448013	0.841127	ENSSSCG00000025095|ENSSSCG00000005209|ENSSSCG00000026816	ssc:397190|ssc:100038023|ssc:100620540|	397190|100038023|100620540|	PPP1R12A, MYPT1|RPS6| |	http://www.genome.jp/kegg-bin/show_pathway?ssc05205/ssc:100038023%09red/ssc:100620540%09red/ssc:397190%09red
Leukocyte transendothelial migration	KEGG PATHWAY	ssc04670	2	119	0.453249	0.841127	ENSSSCG00000026816|ENSSSCG00000023028	ssc:100620540|ssc:100621244|	100620540|100621244|	|JAM2|	http://www.genome.jp/kegg-bin/show_pathway?ssc04670/ssc:100620540%09red/ssc:100621244%09red
Type II diabetes mellitus	KEGG PATHWAY	ssc04930	1	48	0.463985	0.841127	ENSSSCG00000008444	ssc:100524932|	100524932|	PRKCE|	http://www.genome.jp/kegg-bin/show_pathway?ssc04930/ssc:100524932%09red
Glutamatergic synapse	KEGG PATHWAY	ssc04724	2	123	0.469986	0.841127	ENSSSCG00000005285|ENSSSCG00000015580	ssc:654405|ssc:100520687|	654405|100520687|	GNAQ|PLA2G4A|	http://www.genome.jp/kegg-bin/show_pathway?ssc04724/ssc:654405%09red/ssc:100520687%09red
NOD-like receptor signaling pathway	KEGG PATHWAY	ssc04621	1	50	0.477471	0.841127	ENSSSCG00000030957	ssc:751869|	751869|	NFKB1|	http://www.genome.jp/kegg-bin/show_pathway?ssc04621/ssc:751869%09red
Lysine degradation	KEGG PATHWAY	ssc00310	1	50	0.477471	0.841127	ENSSSCG00000013883	ssc:100517457|	100517457|	GLT25D1|	http://www.genome.jp/kegg-bin/show_pathway?ssc00310/ssc:100517457%09red
Ovarian steroidogenesis	KEGG PATHWAY	ssc04913	1	51	0.484086	0.841127	ENSSSCG00000015580	ssc:100520687|	100520687|	PLA2G4A|	http://www.genome.jp/kegg-bin/show_pathway?ssc04913/ssc:100520687%09red
Tight junction	KEGG PATHWAY	ssc04530	2	129	0.494508	0.841127	ENSSSCG00000008444|ENSSSCG00000023028	ssc:100524932|ssc:100621244|	100524932|100621244|	PRKCE|JAM2|	http://www.genome.jp/kegg-bin/show_pathway?ssc04530/ssc:100524932%09red/ssc:100621244%09red
Spliceosome	KEGG PATHWAY	ssc03040	2	129	0.494508	0.841127	ENSSSCG00000025674|ENSSSCG00000027224	ssc:100737104|ssc:100511501|	100737104|100511501|	SNRNP27|PCBP1|	http://www.genome.jp/kegg-bin/show_pathway?ssc03040/ssc:100737104%09red/ssc:100511501%09red
Acute myeloid leukemia	KEGG PATHWAY	ssc05221	1	54	0.503436	0.841127	ENSSSCG00000030957	ssc:751869|	751869|	NFKB1|	http://www.genome.jp/kegg-bin/show_pathway?ssc05221/ssc:751869%09red
Glycolysis / Gluconeogenesis	KEGG PATHWAY	ssc00010	1	54	0.503436	0.841127	ENSSSCG00000017904	ssc:692156|	692156|	ENO3|	http://www.genome.jp/kegg-bin/show_pathway?ssc00010/ssc:692156%09red
Arginine and proline metabolism	KEGG PATHWAY	ssc00330	1	55	0.509723	0.841127	ENSSSCG00000017755	ssc:396859|	396859|	NOS2, INOS, NOS2a|	http://www.genome.jp/kegg-bin/show_pathway?ssc00330/ssc:396859%09red
Ubiquitin mediated proteolysis	KEGG PATHWAY	ssc04120	2	134	0.514387	0.841127	ENSSSCG00000003334|ENSSSCG00000011393	ssc:100523610|ssc:100512631|	100523610|100512631|	UBE2J2|UBA7|	http://www.genome.jp/kegg-bin/show_pathway?ssc04120/ssc:100512631%09red/ssc:100523610%09red
VEGF signaling pathway	KEGG PATHWAY	ssc04370	1	58	0.528115	0.841127	ENSSSCG00000015580	ssc:100520687|	100520687|	PLA2G4A|	http://www.genome.jp/kegg-bin/show_pathway?ssc04370/ssc:100520687%09red
Synaptic vesicle cycle	KEGG PATHWAY	ssc04721	1	59	0.534091	0.841127	ENSSSCG00000027848	ssc:100621404|	100621404|	UNC13B|	http://www.genome.jp/kegg-bin/show_pathway?ssc04721/ssc:100621404%09red
Cytosolic DNA-sensing pathway	KEGG PATHWAY	ssc04623	1	61	0.545818	0.841127	ENSSSCG00000030957	ssc:751869|	751869|	NFKB1|	http://www.genome.jp/kegg-bin/show_pathway?ssc04623/ssc:751869%09red
Arachidonic acid metabolism	KEGG PATHWAY	ssc00590	1	62	0.551571	0.841127	ENSSSCG00000015580	ssc:100520687|	100520687|	PLA2G4A|	http://www.genome.jp/kegg-bin/show_pathway?ssc00590/ssc:100520687%09red
Biosynthesis of amino acids	KEGG PATHWAY	ssc01230	1	63	0.557251	0.841127	ENSSSCG00000017904	ssc:692156|	692156|	ENO3|	http://www.genome.jp/kegg-bin/show_pathway?ssc01230/ssc:692156%09red
Fc epsilon RI signaling pathway	KEGG PATHWAY	ssc04664	1	63	0.557251	0.841127	ENSSSCG00000015580	ssc:100520687|	100520687|	PLA2G4A|	http://www.genome.jp/kegg-bin/show_pathway?ssc04664/ssc:100520687%09red
MicroRNAs in cancer	KEGG PATHWAY	ssc05206	3	228	0.560614	0.841127	ENSSSCG00000007151|ENSSSCG00000030957|ENSSSCG00000008444	ssc:100329127|ssc:751869|ssc:100524932|	100329127|751869|100524932|	CDC25B|NFKB1|PRKCE|	http://www.genome.jp/kegg-bin/show_pathway?ssc05206/ssc:100524932%09red/ssc:751869%09red/ssc:100329127%09red
Renal cell carcinoma	KEGG PATHWAY	ssc05211	1	64	0.56286	0.841127	ENSSSCG00000026816	ssc:100620540|	100620540|	|	http://www.genome.jp/kegg-bin/show_pathway?ssc05211/ssc:100620540%09red
Legionellosis	KEGG PATHWAY	ssc05134	1	64	0.56286	0.841127	ENSSSCG00000030957	ssc:751869|	751869|	NFKB1|	http://www.genome.jp/kegg-bin/show_pathway?ssc05134/ssc:751869%09red
RIG-I-like receptor signaling pathway	KEGG PATHWAY	ssc04622	1	68	0.584595	0.841616	ENSSSCG00000030957	ssc:751869|	751869|	NFKB1|	http://www.genome.jp/kegg-bin/show_pathway?ssc04622/ssc:751869%09red
RNA degradation	KEGG PATHWAY	ssc03018	1	71	0.600186	0.841616	ENSSSCG00000017904	ssc:692156|	692156|	ENO3|	http://www.genome.jp/kegg-bin/show_pathway?ssc03018/ssc:692156%09red
Thyroid hormone synthesis	KEGG PATHWAY	ssc04918	1	72	0.605252	0.841616	ENSSSCG00000005285	ssc:654405|	654405|	GNAQ|	http://www.genome.jp/kegg-bin/show_pathway?ssc04918/ssc:654405%09red
B cell receptor signaling pathway	KEGG PATHWAY	ssc04662	1	72	0.605252	0.841616	ENSSSCG00000030957	ssc:751869|	751869|	NFKB1|	http://www.genome.jp/kegg-bin/show_pathway?ssc04662/ssc:751869%09red
Gastric acid secretion	KEGG PATHWAY	ssc04971	1	74	0.615194	0.841616	ENSSSCG00000005285	ssc:654405|	654405|	GNAQ|	http://www.genome.jp/kegg-bin/show_pathway?ssc04971/ssc:654405%09red
Salivary secretion	KEGG PATHWAY	ssc04970	1	75	0.620071	0.841616	ENSSSCG00000005285	ssc:654405|	654405|	GNAQ|	http://www.genome.jp/kegg-bin/show_pathway?ssc04970/ssc:654405%09red
Peroxisome	KEGG PATHWAY	ssc04146	1	80	0.643546	0.841616	ENSSSCG00000017755	ssc:396859|	396859|	NOS2, INOS, NOS2a|	http://www.genome.jp/kegg-bin/show_pathway?ssc04146/ssc:396859%09red
Fc gamma R-mediated phagocytosis	KEGG PATHWAY	ssc04666	1	81	0.648065	0.841616	ENSSSCG00000008444	ssc:100524932|	100524932|	PRKCE|	http://www.genome.jp/kegg-bin/show_pathway?ssc04666/ssc:100524932%09red
Glycerophospholipid metabolism	KEGG PATHWAY	ssc00564	1	83	0.656932	0.841616	ENSSSCG00000015580	ssc:100520687|	100520687|	PLA2G4A|	http://www.genome.jp/kegg-bin/show_pathway?ssc00564/ssc:100520687%09red
Prostate cancer	KEGG PATHWAY	ssc05215	1	85	0.665576	0.841616	ENSSSCG00000030957	ssc:751869|	751869|	NFKB1|	http://www.genome.jp/kegg-bin/show_pathway?ssc05215/ssc:751869%09red
Hematopoietic cell lineage	KEGG PATHWAY	ssc04640	1	85	0.665576	0.841616	ENSSSCG00000017908	ssc:100515052|	100515052|	GP1BA, GPIBA|	http://www.genome.jp/kegg-bin/show_pathway?ssc04640/ssc:100515052%09red
Neuroactive ligand-receptor interaction	KEGG PATHWAY	ssc04080	3	268	0.668076	0.841616	ENSSSCG00000017872|ENSSSCG00000011716|ENSSSCG00000017909	ssc:100739675|ssc:100524766|ssc:100515236|	100739675|100524766|100515236|	|P2RY13|CHRNE|	http://www.genome.jp/kegg-bin/show_pathway?ssc04080/ssc:100515236%09red/ssc:100739675%09red/ssc:100524766%09red
Insulin secretion	KEGG PATHWAY	ssc04911	1	86	0.669816	0.841616	ENSSSCG00000005285	ssc:654405|	654405|	GNAQ|	http://www.genome.jp/kegg-bin/show_pathway?ssc04911/ssc:654405%09red
Pancreatic secretion	KEGG PATHWAY	ssc04972	1	87	0.674003	0.841616	ENSSSCG00000005285	ssc:654405|	654405|	GNAQ|	http://www.genome.jp/kegg-bin/show_pathway?ssc04972/ssc:654405%09red
Purine metabolism	KEGG PATHWAY	ssc00230	2	183	0.680715	0.841616	ENSSSCG00000003808|ENSSSCG00000025783	ssc:733667|ssc:100623360|	733667|100623360|	AK3L1, AK3|ENTPD3|	http://www.genome.jp/kegg-bin/show_pathway?ssc00230/ssc:100623360%09red/ssc:733667%09red
Gap junction	KEGG PATHWAY	ssc04540	1	90	0.686248	0.841616	ENSSSCG00000005285	ssc:654405|	654405|	GNAQ|	http://www.genome.jp/kegg-bin/show_pathway?ssc04540/ssc:654405%09red
Morphine addiction	KEGG PATHWAY	ssc05032	1	90	0.686248	0.841616	ENSSSCG00000008694	ssc:100519668|	100519668|	GRK4|	http://www.genome.jp/kegg-bin/show_pathway?ssc05032/ssc:100519668%09red
NF-kappa B signaling pathway	KEGG PATHWAY	ssc04064	1	90	0.686248	0.841616	ENSSSCG00000030957	ssc:751869|	751869|	NFKB1|	http://www.genome.jp/kegg-bin/show_pathway?ssc04064/ssc:751869%09red
Apoptosis	KEGG PATHWAY	ssc04210	1	91	0.690227	0.841616	ENSSSCG00000030957	ssc:751869|	751869|	NFKB1|	http://www.genome.jp/kegg-bin/show_pathway?ssc04210/ssc:751869%09red
Melanogenesis	KEGG PATHWAY	ssc04916	1	95	0.705647	0.841616	ENSSSCG00000005285	ssc:654405|	654405|	GNAQ|	http://www.genome.jp/kegg-bin/show_pathway?ssc04916/ssc:654405%09red
Retrograde endocannabinoid signaling	KEGG PATHWAY	ssc04723	1	95	0.705647	0.841616	ENSSSCG00000005285	ssc:654405|	654405|	GNAQ|	http://www.genome.jp/kegg-bin/show_pathway?ssc04723/ssc:654405%09red
Olfactory transduction	KEGG PATHWAY	ssc04740	9	810	0.71073	0.841616	ENSSSCG00000014608|ENSSSCG00000023061|ENSSSCG00000028131|ENSSSCG00000014612|ENSSSCG00000022928|ENSSSCG00000014614|ENSSSCG00000024421|ENSSSCG00000020877|ENSSSCG00000014617	ssc:100525352|ssc:100511945|ssc:100738899|ssc:100738602|ssc:100738602|ssc:100738640|ssc:100738816|ssc:100738816|ssc:100738942|	100525352|100511945|100738899|100738602|100738602|100738640|100738816|100738816|100738942|	| | | | | | | | |	http://www.genome.jp/kegg-bin/show_pathway?ssc04740/ssc:100511945%09red/ssc:100525352%09red/ssc:100738602%09red/ssc:100738899%09red/ssc:100738816%09red/ssc:100738942%09red/ssc:100738640%09red
Estrogen signaling pathway	KEGG PATHWAY	ssc04915	1	97	0.713067	0.841616	ENSSSCG00000005285	ssc:654405|	654405|	GNAQ|	http://www.genome.jp/kegg-bin/show_pathway?ssc04915/ssc:654405%09red
Circadian entrainment	KEGG PATHWAY	ssc04713	1	98	0.716707	0.841616	ENSSSCG00000005285	ssc:654405|	654405|	GNAQ|	http://www.genome.jp/kegg-bin/show_pathway?ssc04713/ssc:654405%09red
Regulation of actin cytoskeleton	KEGG PATHWAY	ssc04810	2	198	0.721385	0.841616	ENSSSCG00000025095|ENSSSCG00000017905	ssc:397190|ssc:100512494|	397190|100512494|	PPP1R12A, MYPT1|PFN1|	http://www.genome.jp/kegg-bin/show_pathway?ssc04810/ssc:100512494%09red/ssc:397190%09red
cAMP signaling pathway	KEGG PATHWAY	ssc04024	2	201	0.728977	0.842481	ENSSSCG00000025095|ENSSSCG00000030957	ssc:397190|ssc:751869|	397190|751869|	PPP1R12A, MYPT1|NFKB1|	http://www.genome.jp/kegg-bin/show_pathway?ssc04024/ssc:751869%09red/ssc:397190%09red
Endocytosis	KEGG PATHWAY	ssc04144	2	206	0.74124	0.842481	ENSSSCG00000017167|ENSSSCG00000008694	ssc:100240721|ssc:100519668|	100240721|100519668|	CYTH2|GRK4|	http://www.genome.jp/kegg-bin/show_pathway?ssc04144/ssc:100519668%09red/ssc:100240721%09red
T cell receptor signaling pathway	KEGG PATHWAY	ssc04660	1	107	0.747465	0.842481	ENSSSCG00000030957	ssc:751869|	751869|	NFKB1|	http://www.genome.jp/kegg-bin/show_pathway?ssc04660/ssc:751869%09red
Oocyte meiosis	KEGG PATHWAY	ssc04114	1	107	0.747465	0.842481	ENSSSCG00000003558	ssc:100523972|	100523972|	RPS6KA1|	http://www.genome.jp/kegg-bin/show_pathway?ssc04114/ssc:100523972%09red
TNF signaling pathway	KEGG PATHWAY	ssc04668	1	109	0.753834	0.84252	ENSSSCG00000030957	ssc:751869|	751869|	NFKB1|	http://www.genome.jp/kegg-bin/show_pathway?ssc04668/ssc:751869%09red
Cholinergic synapse	KEGG PATHWAY	ssc04725	1	113	0.766097	0.84856	ENSSSCG00000005285	ssc:654405|	654405|	GNAQ|	http://www.genome.jp/kegg-bin/show_pathway?ssc04725/ssc:654405%09red
Cell cycle	KEGG PATHWAY	ssc04110	1	115	0.771998	0.84856	ENSSSCG00000007151	ssc:100329127|	100329127|	CDC25B|	http://www.genome.jp/kegg-bin/show_pathway?ssc04110/ssc:100329127%09red
Dopaminergic synapse	KEGG PATHWAY	ssc04728	1	120	0.78611	0.856988	ENSSSCG00000005285	ssc:654405|	654405|	GNAQ|	http://www.genome.jp/kegg-bin/show_pathway?ssc04728/ssc:654405%09red
Wnt signaling pathway	KEGG PATHWAY	ssc04310	1	128	0.8069	0.869149	ENSSSCG00000015504	ssc:100519266|	100519266|	CACYBP|	http://www.genome.jp/kegg-bin/show_pathway?ssc04310/ssc:100519266%09red
Insulin signaling pathway	KEGG PATHWAY	ssc04910	1	133	0.818858	0.869149	ENSSSCG00000005209	ssc:100038023|	100038023|	RPS6|	http://www.genome.jp/kegg-bin/show_pathway?ssc04910/ssc:100038023%09red
Oxidative phosphorylation	KEGG PATHWAY	ssc00190	1	134	0.821159	0.869149	ENSSSCG00000022586	ssc:100621056|	100621056|	|	http://www.genome.jp/kegg-bin/show_pathway?ssc00190/ssc:100621056%09red
Hippo signaling pathway	KEGG PATHWAY	ssc04390	1	138	0.830078	0.869149	ENSSSCG00000006074	ssc:100524741|	100524741|	STK3|	http://www.genome.jp/kegg-bin/show_pathway?ssc04390/ssc:100524741%09red
HTLV-I infection	KEGG PATHWAY	ssc05166	2	253	0.83493	0.869149	ENSSSCG00000030957|ENSSSCG00000010224	ssc:751869|ssc:100038004|	751869|100038004|	NFKB1|EGR2|	http://www.genome.jp/kegg-bin/show_pathway?ssc05166/ssc:751869%09red/ssc:100038004%09red
Adrenergic signaling in cardiomyocytes	KEGG PATHWAY	ssc04261	1	141	0.836474	0.869149	ENSSSCG00000005285	ssc:654405|	654405|	GNAQ|	http://www.genome.jp/kegg-bin/show_pathway?ssc04261/ssc:654405%09red
Transcriptional misregulation in cancer	KEGG PATHWAY	ssc05202	1	156	0.865032	0.891854	ENSSSCG00000030957	ssc:751869|	751869|	NFKB1|	http://www.genome.jp/kegg-bin/show_pathway?ssc05202/ssc:751869%09red
Non-alcoholic fatty liver disease (NAFLD)	KEGG PATHWAY	ssc04932	1	160	0.871769	0.891886	ENSSSCG00000030957	ssc:751869|	751869|	NFKB1|	http://www.genome.jp/kegg-bin/show_pathway?ssc04932/ssc:751869%09red
Focal adhesion	KEGG PATHWAY	ssc04510	1	194	0.917049	0.929751	ENSSSCG00000025095	ssc:397190|	397190|	PPP1R12A, MYPT1|	http://www.genome.jp/kegg-bin/show_pathway?ssc04510/ssc:397190%09red
PI3K-Akt signaling pathway	KEGG PATHWAY	ssc04151	2	328	0.922761	0.929751	ENSSSCG00000030957|ENSSSCG00000005209	ssc:751869|ssc:100038023|	751869|100038023|	NFKB1|RPS6|	http://www.genome.jp/kegg-bin/show_pathway?ssc04151/ssc:100038023%09red/ssc:751869%09red
Metabolic pathways	KEGG PATHWAY	ssc01100	8	1166	0.982874	0.982874	ENSSSCG00000003808|ENSSSCG00000015580|ENSSSCG00000010223|ENSSSCG00000017755|ENSSSCG00000017904|ENSSSCG00000012731|ENSSSCG00000013878|ENSSSCG00000022586	ssc:733667|ssc:100520687|ssc:100153304|ssc:396859|ssc:692156|ssc:100512880|ssc:100517636|ssc:100621056|	733667|100520687|100153304|396859|692156|100512880|100517636|100621056|	AK3L1, AK3|PLA2G4A|ADO|NOS2, INOS, NOS2a|ENO3|IDS|PGLS| |	http://www.genome.jp/kegg-bin/show_pathway?ssc01100/ssc:692156%09red/ssc:100520687%09red/ssc:100512880%09red/ssc:100517636%09red/ssc:733667%09red/ssc:100621056%09red/ssc:396859%09red/ssc:100153304%09red

## Sheet: GSWW Down
##Databases: KEGG PATHWAY
##Statistical test method: hypergeometric test / Fisher's exact test
##FDR correction method: Benjamini and Hochberg
#Term	Database	ID	Input number	Background number	P-Value	Corrected P-Value	Input	KO	Entrez_ID	KO_name	Hyperlink
Intestinal immune network for IgA production	KEGG PATHWAY	ssc04672	7	44	2.3917e-06	0.000303746	ENSSSCG00000001453|ENSSSCG00000001456|ENSSSCG00000016871|ENSSSCG00000001455|ENSSSCG00000009542|ENSSSCG00000001459|ENSSSCG00000001457	ssc:100135040|ssc:100153387|ssc:554303|ssc:100153386|ssc:100038026|ssc:100135049|ssc:100037921|	100135040|100153387|554303|100153386|100038026|100135049|100037921|	SLA-DRA, SLA-DR-alpha, SLA-DRA1|SLA-DQA1, SLA-DQA|CCL28, MEC|SLA-DRB1, DRB1, LA-DRB-d, SLA-DRB|TNFSF13B, BAFF|SLA-DOB|SLA-DQB1, SLA-DQB, SLADQB|	http://www.genome.jp/kegg-bin/show_pathway?ssc04672/ssc:100153387%09red/ssc:100153386%09red/ssc:100038026%09red/ssc:554303%09red/ssc:100037921%09red/ssc:100135049%09red/ssc:100135040%09red
Asthma	KEGG PATHWAY	ssc05310	5	24	2.2124e-05	0.00140487	ENSSSCG00000001453|ENSSSCG00000001459|ENSSSCG00000001456|ENSSSCG00000001457|ENSSSCG00000001455	ssc:100135040|ssc:100135049|ssc:100153387|ssc:100037921|ssc:100153386|	100135040|100135049|100153387|100037921|100153386|	SLA-DRA, SLA-DR-alpha, SLA-DRA1|SLA-DOB|SLA-DQA1, SLA-DQA|SLA-DQB1, SLA-DQB, SLADQB|SLA-DRB1, DRB1, LA-DRB-d, SLA-DRB|	http://www.genome.jp/kegg-bin/show_pathway?ssc05310/ssc:100135040%09red/ssc:100135049%09red/ssc:100153387%09red/ssc:100153386%09red/ssc:100037921%09red
Graft-versus-host disease	KEGG PATHWAY	ssc05332	5	35	0.000110105	0.00397338	ENSSSCG00000001453|ENSSSCG00000001459|ENSSSCG00000001456|ENSSSCG00000001457|ENSSSCG00000001455	ssc:100135040|ssc:100135049|ssc:100153387|ssc:100037921|ssc:100153386|	100135040|100135049|100153387|100037921|100153386|	SLA-DRA, SLA-DR-alpha, SLA-DRA1|SLA-DOB|SLA-DQA1, SLA-DQA|SLA-DQB1, SLA-DQB, SLADQB|SLA-DRB1, DRB1, LA-DRB-d, SLA-DRB|	http://www.genome.jp/kegg-bin/show_pathway?ssc05332/ssc:100135040%09red/ssc:100135049%09red/ssc:100153387%09red/ssc:100153386%09red/ssc:100037921%09red
Rheumatoid arthritis	KEGG PATHWAY	ssc05323	7	87	0.000136594	0.00397338	ENSSSCG00000008056|ENSSSCG00000001453|ENSSSCG00000001456|ENSSSCG00000001457|ENSSSCG00000001455|ENSSSCG00000009542|ENSSSCG00000001459	ssc:100518959|ssc:100135040|ssc:100153387|ssc:100037921|ssc:100153386|ssc:100038026|ssc:100135049|	100518959|100135040|100153387|100037921|100153386|100038026|100135049|	ATP6V0C|SLA-DRA, SLA-DR-alpha, SLA-DRA1|SLA-DQA1, SLA-DQA|SLA-DQB1, SLA-DQB, SLADQB|SLA-DRB1, DRB1, LA-DRB-d, SLA-DRB|TNFSF13B, BAFF|SLA-DOB|	http://www.genome.jp/kegg-bin/show_pathway?ssc05323/ssc:100153387%09red/ssc:100153386%09red/ssc:100038026%09red/ssc:100037921%09red/ssc:100135049%09red/ssc:100135040%09red/ssc:100518959%09red
Allograft rejection	KEGG PATHWAY	ssc05330	5	38	0.000156432	0.00397338	ENSSSCG00000001453|ENSSSCG00000001459|ENSSSCG00000001456|ENSSSCG00000001457|ENSSSCG00000001455	ssc:100135040|ssc:100135049|ssc:100153387|ssc:100037921|ssc:100153386|	100135040|100135049|100153387|100037921|100153386|	SLA-DRA, SLA-DR-alpha, SLA-DRA1|SLA-DOB|SLA-DQA1, SLA-DQA|SLA-DQB1, SLA-DQB, SLADQB|SLA-DRB1, DRB1, LA-DRB-d, SLA-DRB|	http://www.genome.jp/kegg-bin/show_pathway?ssc05330/ssc:100135040%09red/ssc:100135049%09red/ssc:100153387%09red/ssc:100153386%09red/ssc:100037921%09red
Type I diabetes mellitus	KEGG PATHWAY	ssc04940	5	42	0.000239761	0.00470809	ENSSSCG00000001453|ENSSSCG00000001459|ENSSSCG00000001456|ENSSSCG00000001457|ENSSSCG00000001455	ssc:100135040|ssc:100135049|ssc:100153387|ssc:100037921|ssc:100153386|	100135040|100135049|100153387|100037921|100153386|	SLA-DRA, SLA-DR-alpha, SLA-DRA1|SLA-DOB|SLA-DQA1, SLA-DQA|SLA-DQB1, SLA-DQB, SLADQB|SLA-DRB1, DRB1, LA-DRB-d, SLA-DRB|	http://www.genome.jp/kegg-bin/show_pathway?ssc04940/ssc:100135040%09red/ssc:100135049%09red/ssc:100153387%09red/ssc:100153386%09red/ssc:100037921%09red
Antigen processing and presentation	KEGG PATHWAY	ssc04612	6	68	0.000259501	0.00470809	ENSSSCG00000001459|ENSSSCG00000001453|ENSSSCG00000001456|ENSSSCG00000001457|ENSSSCG00000001455|ENSSSCG00000011106	ssc:100135049|ssc:100135040|ssc:100153387|ssc:100037921|ssc:100153386|ssc:397449|	100135049|100135040|100153387|100037921|100153386|397449|	SLA-DOB|SLA-DRA, SLA-DR-alpha, SLA-DRA1|SLA-DQA1, SLA-DQA|SLA-DQB1, SLA-DQB, SLADQB|SLA-DRB1, DRB1, LA-DRB-d, SLA-DRB|CREB1|	http://www.genome.jp/kegg-bin/show_pathway?ssc04612/ssc:100153387%09red/ssc:100153386%09red/ssc:100037921%09red/ssc:100135049%09red/ssc:397449%09red/ssc:100135040%09red
Staphylococcus aureus infection	KEGG PATHWAY	ssc05150	5	47	0.000386954	0.00614289	ENSSSCG00000001453|ENSSSCG00000001459|ENSSSCG00000001456|ENSSSCG00000001457|ENSSSCG00000001455	ssc:100135040|ssc:100135049|ssc:100153387|ssc:100037921|ssc:100153386|	100135040|100135049|100153387|100037921|100153386|	SLA-DRA, SLA-DR-alpha, SLA-DRA1|SLA-DOB|SLA-DQA1, SLA-DQA|SLA-DQB1, SLA-DQB, SLADQB|SLA-DRB1, DRB1, LA-DRB-d, SLA-DRB|	http://www.genome.jp/kegg-bin/show_pathway?ssc05150/ssc:100135040%09red/ssc:100135049%09red/ssc:100153387%09red/ssc:100153386%09red/ssc:100037921%09red
Autoimmune thyroid disease	KEGG PATHWAY	ssc05320	5	51	0.000547059	0.00771961	ENSSSCG00000001453|ENSSSCG00000001459|ENSSSCG00000001456|ENSSSCG00000001457|ENSSSCG00000001455	ssc:100135040|ssc:100135049|ssc:100153387|ssc:100037921|ssc:100153386|	100135040|100135049|100153387|100037921|100153386|	SLA-DRA, SLA-DR-alpha, SLA-DRA1|SLA-DOB|SLA-DQA1, SLA-DQA|SLA-DQB1, SLA-DQB, SLADQB|SLA-DRB1, DRB1, LA-DRB-d, SLA-DRB|	http://www.genome.jp/kegg-bin/show_pathway?ssc05320/ssc:100135040%09red/ssc:100135049%09red/ssc:100153387%09red/ssc:100153386%09red/ssc:100037921%09red
Toxoplasmosis	KEGG PATHWAY	ssc05145	7	115	0.000673562	0.00855423	ENSSSCG00000008060|ENSSSCG00000001453|ENSSSCG00000001456|ENSSSCG00000001457|ENSSSCG00000007030|ENSSSCG00000001455|ENSSSCG00000001459	ssc:100192445|ssc:100135040|ssc:100153387|ssc:100037921|ssc:100101471|ssc:100153386|ssc:100135049|	100192445|100135040|100153387|100037921|100101471|100153386|100135049|	PDPK1|SLA-DRA, SLA-DR-alpha, SLA-DRA1|SLA-DQA1, SLA-DQA|SLA-DQB1, SLA-DQB, SLADQB|IKBKB|SLA-DRB1, DRB1, LA-DRB-d, SLA-DRB|SLA-DOB|	http://www.genome.jp/kegg-bin/show_pathway?ssc05145/ssc:100153387%09red/ssc:100153386%09red/ssc:100037921%09red/ssc:100135049%09red/ssc:100101471%09red/ssc:100135040%09red/ssc:100192445%09red
Inflammatory bowel disease (IBD)	KEGG PATHWAY	ssc05321	5	62	0.0012433	0.0120564	ENSSSCG00000001453|ENSSSCG00000001459|ENSSSCG00000001456|ENSSSCG00000001457|ENSSSCG00000001455	ssc:100135040|ssc:100135049|ssc:100153387|ssc:100037921|ssc:100153386|	100135040|100135049|100153387|100037921|100153386|	SLA-DRA, SLA-DR-alpha, SLA-DRA1|SLA-DOB|SLA-DQA1, SLA-DQA|SLA-DQB1, SLA-DQB, SLADQB|SLA-DRB1, DRB1, LA-DRB-d, SLA-DRB|	http://www.genome.jp/kegg-bin/show_pathway?ssc05321/ssc:100135040%09red/ssc:100135049%09red/ssc:100153387%09red/ssc:100153386%09red/ssc:100037921%09red
HTLV-I infection	KEGG PATHWAY	ssc05166	10	253	0.00132296	0.0120564	ENSSSCG00000001459|ENSSSCG00000003876|ENSSSCG00000001455|ENSSSCG00000001453|ENSSSCG00000007026|ENSSSCG00000001456|ENSSSCG00000001457|ENSSSCG00000007030|ENSSSCG00000007031|ENSSSCG00000011106	ssc:100135049|ssc:100515210|ssc:100153386|ssc:100135040|ssc:397651|ssc:100153387|ssc:100037921|ssc:100101471|ssc:100526021|ssc:397449|	100135049|100515210|100153386|100135040|397651|100153387|100037921|100101471|100526021|397449|	SLA-DOB| |SLA-DRB1, DRB1, LA-DRB-d, SLA-DRB|SLA-DRA, SLA-DR-alpha, SLA-DRA1|VDAC1P5, VDAC3, VDAC5P|SLA-DQA1, SLA-DQA|SLA-DQB1, SLA-DQB, SLADQB|IKBKB|POLB|CREB1|	http://www.genome.jp/kegg-bin/show_pathway?ssc05166/ssc:397449%09red/ssc:100153387%09red/ssc:100153386%09red/ssc:100101471%09red/ssc:100037921%09red/ssc:100135049%09red/ssc:100515210%09red/ssc:397651%09red/ssc:100526021%09red/ssc:100135040%09red
Leishmaniasis	KEGG PATHWAY	ssc05140	5	63	0.00132905	0.0120564	ENSSSCG00000001453|ENSSSCG00000001459|ENSSSCG00000001456|ENSSSCG00000001457|ENSSSCG00000001455	ssc:100135040|ssc:100135049|ssc:100153387|ssc:100037921|ssc:100153386|	100135040|100135049|100153387|100037921|100153386|	SLA-DRA, SLA-DR-alpha, SLA-DRA1|SLA-DOB|SLA-DQA1, SLA-DQA|SLA-DQB1, SLA-DQB, SLADQB|SLA-DRB1, DRB1, LA-DRB-d, SLA-DRB|	http://www.genome.jp/kegg-bin/show_pathway?ssc05140/ssc:100135040%09red/ssc:100135049%09red/ssc:100153387%09red/ssc:100153386%09red/ssc:100037921%09red
Viral myocarditis	KEGG PATHWAY	ssc05416	5	63	0.00132905	0.0120564	ENSSSCG00000001453|ENSSSCG00000001459|ENSSSCG00000001456|ENSSSCG00000001457|ENSSSCG00000001455	ssc:100135040|ssc:100135049|ssc:100153387|ssc:100037921|ssc:100153386|	100135040|100135049|100153387|100037921|100153386|	SLA-DRA, SLA-DR-alpha, SLA-DRA1|SLA-DOB|SLA-DQA1, SLA-DQA|SLA-DQB1, SLA-DQB, SLADQB|SLA-DRB1, DRB1, LA-DRB-d, SLA-DRB|	http://www.genome.jp/kegg-bin/show_pathway?ssc05416/ssc:100135040%09red/ssc:100135049%09red/ssc:100153387%09red/ssc:100153386%09red/ssc:100037921%09red
Cell adhesion molecules (CAMs)	KEGG PATHWAY	ssc04514	7	146	0.00249439	0.0205351	ENSSSCG00000013024|ENSSSCG00000023162|ENSSSCG00000001453|ENSSSCG00000001456|ENSSSCG00000001457|ENSSSCG00000001455|ENSSSCG00000001459	ssc:100524236|ssc:100187727|ssc:100135040|ssc:100153387|ssc:100037921|ssc:100153386|ssc:100135049|	100524236|100187727|100135040|100153387|100037921|100153386|100135049|	NRXN2|CDH15, CDH3, Cadherin-3|SLA-DRA, SLA-DR-alpha, SLA-DRA1|SLA-DQA1, SLA-DQA|SLA-DQB1, SLA-DQB, SLADQB|SLA-DRB1, DRB1, LA-DRB-d, SLA-DRB|SLA-DOB|	http://www.genome.jp/kegg-bin/show_pathway?ssc04514/ssc:100153387%09red/ssc:100153386%09red/ssc:100037921%09red/ssc:100135049%09red/ssc:100187727%09red/ssc:100135040%09red/ssc:100524236%09red
Phagosome	KEGG PATHWAY	ssc04145	7	147	0.0025871	0.0205351	ENSSSCG00000008056|ENSSSCG00000026022|ENSSSCG00000001453|ENSSSCG00000001456|ENSSSCG00000001457|ENSSSCG00000001455|ENSSSCG00000001459	ssc:100518959|ssc:100153507|ssc:100135040|ssc:100153387|ssc:100037921|ssc:100153386|ssc:100135049|	100518959|100153507|100135040|100153387|100037921|100153386|100135049|	ATP6V0C|TUBB2B|SLA-DRA, SLA-DR-alpha, SLA-DRA1|SLA-DQA1, SLA-DQA|SLA-DQB1, SLA-DQB, SLADQB|SLA-DRB1, DRB1, LA-DRB-d, SLA-DRB|SLA-DOB|	http://www.genome.jp/kegg-bin/show_pathway?ssc04145/ssc:100153387%09red/ssc:100153386%09red/ssc:100153507%09red/ssc:100037921%09red/ssc:100135049%09red/ssc:100135040%09red/ssc:100518959%09red
Tuberculosis	KEGG PATHWAY	ssc05152	7	174	0.00624775	0.0466744	ENSSSCG00000001459|ENSSSCG00000001453|ENSSSCG00000008056|ENSSSCG00000001456|ENSSSCG00000001457|ENSSSCG00000001455|ENSSSCG00000011106	ssc:100135049|ssc:100135040|ssc:100518959|ssc:100153387|ssc:100037921|ssc:100153386|ssc:397449|	100135049|100135040|100518959|100153387|100037921|100153386|397449|	SLA-DOB|SLA-DRA, SLA-DR-alpha, SLA-DRA1|ATP6V0C|SLA-DQA1, SLA-DQA|SLA-DQB1, SLA-DQB, SLADQB|SLA-DRB1, DRB1, LA-DRB-d, SLA-DRB|CREB1|	http://www.genome.jp/kegg-bin/show_pathway?ssc05152/ssc:100153387%09red/ssc:100153386%09red/ssc:100037921%09red/ssc:100135049%09red/ssc:397449%09red/ssc:100135040%09red/ssc:100518959%09red
Systemic lupus erythematosus	KEGG PATHWAY	ssc05322	5	102	0.00931595	0.0657292	ENSSSCG00000001453|ENSSSCG00000001459|ENSSSCG00000001456|ENSSSCG00000001457|ENSSSCG00000001455	ssc:100135040|ssc:100135049|ssc:100153387|ssc:100037921|ssc:100153386|	100135040|100135049|100153387|100037921|100153386|	SLA-DRA, SLA-DR-alpha, SLA-DRA1|SLA-DOB|SLA-DQA1, SLA-DQA|SLA-DQB1, SLA-DQB, SLADQB|SLA-DRB1, DRB1, LA-DRB-d, SLA-DRB|	http://www.genome.jp/kegg-bin/show_pathway?ssc05322/ssc:100135040%09red/ssc:100135049%09red/ssc:100153387%09red/ssc:100153386%09red/ssc:100037921%09red
Influenza A	KEGG PATHWAY	ssc05164	6	168	0.0185009	0.123664	ENSSSCG00000001453|ENSSSCG00000001456|ENSSSCG00000001457|ENSSSCG00000007030|ENSSSCG00000001455|ENSSSCG00000001459	ssc:100135040|ssc:100153387|ssc:100037921|ssc:100101471|ssc:100153386|ssc:100135049|	100135040|100153387|100037921|100101471|100153386|100135049|	SLA-DRA, SLA-DR-alpha, SLA-DRA1|SLA-DQA1, SLA-DQA|SLA-DQB1, SLA-DQB, SLADQB|IKBKB|SLA-DRB1, DRB1, LA-DRB-d, SLA-DRB|SLA-DOB|	http://www.genome.jp/kegg-bin/show_pathway?ssc05164/ssc:100153387%09red/ssc:100153386%09red/ssc:100037921%09red/ssc:100135049%09red/ssc:100101471%09red/ssc:100135040%09red
Herpes simplex infection	KEGG PATHWAY	ssc05168	6	182	0.0258653	0.164245	ENSSSCG00000001453|ENSSSCG00000001456|ENSSSCG00000001457|ENSSSCG00000007030|ENSSSCG00000001455|ENSSSCG00000001459	ssc:100135040|ssc:100153387|ssc:100037921|ssc:100101471|ssc:100153386|ssc:100135049|	100135040|100153387|100037921|100101471|100153386|100135049|	SLA-DRA, SLA-DR-alpha, SLA-DRA1|SLA-DQA1, SLA-DQA|SLA-DQB1, SLA-DQB, SLADQB|IKBKB|SLA-DRB1, DRB1, LA-DRB-d, SLA-DRB|SLA-DOB|	http://www.genome.jp/kegg-bin/show_pathway?ssc05168/ssc:100153387%09red/ssc:100153386%09red/ssc:100037921%09red/ssc:100135049%09red/ssc:100101471%09red/ssc:100135040%09red
mTOR signaling pathway	KEGG PATHWAY	ssc04150	3	60	0.0397058	0.240126	ENSSSCG00000008060|ENSSSCG00000018045|ENSSSCG00000007030	ssc:100192445|ssc:100525780|ssc:100101471|	100192445|100525780|100101471|	PDPK1|ULK2|IKBKB|	http://www.genome.jp/kegg-bin/show_pathway?ssc04150/ssc:100525780%09red/ssc:100192445%09red/ssc:100101471%09red
Prostate cancer	KEGG PATHWAY	ssc05215	3	85	0.0886745	0.511894	ENSSSCG00000008060|ENSSSCG00000011106|ENSSSCG00000007030	ssc:100192445|ssc:397449|ssc:100101471|	100192445|397449|100101471|	PDPK1|CREB1|IKBKB|	http://www.genome.jp/kegg-bin/show_pathway?ssc05215/ssc:397449%09red/ssc:100192445%09red/ssc:100101471%09red
Vasopressin-regulated water reabsorption	KEGG PATHWAY	ssc04962	2	43	0.100916	0.557232	ENSSSCG00000024342|ENSSSCG00000011106	ssc:100126277|ssc:397449|	100126277|397449|	AQP4|CREB1|	http://www.genome.jp/kegg-bin/show_pathway?ssc04962/ssc:397449%09red/ssc:100126277%09red
Starch and sucrose metabolism	KEGG PATHWAY	ssc00500	2	49	0.124188	0.626126	ENSSSCG00000030150|ENSSSCG00000013022	ssc:100627727|ssc:733659|	100627727|733659|	UGDH|PYGM|	http://www.genome.jp/kegg-bin/show_pathway?ssc00500/ssc:733659%09red/ssc:100627727%09red
Amino sugar and nucleotide sugar metabolism	KEGG PATHWAY	ssc00520	2	49	0.124188	0.626126	ENSSSCG00000008057|ENSSSCG00000030150	ssc:100518775|ssc:100627727|	100518775|100627727|	AMDHD2|UGDH|	http://www.genome.jp/kegg-bin/show_pathway?ssc00520/ssc:100518775%09red/ssc:100627727%09red
NOD-like receptor signaling pathway	KEGG PATHWAY	ssc04621	2	50	0.128183	0.626126	ENSSSCG00000009441|ENSSSCG00000007030	ssc:100736854|ssc:100101471|	100736854|100101471|	SUGT1|IKBKB|	http://www.genome.jp/kegg-bin/show_pathway?ssc04621/ssc:100736854%09red/ssc:100101471%09red
Chagas disease (American trypanosomiasis)	KEGG PATHWAY	ssc05142	3	108	0.147837	0.69538	ENSSSCG00000022163|ENSSSCG00000007030|ENSSSCG00000015842	ssc:100736677|ssc:100101471|ssc:397656|	100736677|100101471|397656|	GNAL|IKBKB|PPP2CA|	http://www.genome.jp/kegg-bin/show_pathway?ssc05142/ssc:397656%09red/ssc:100101471%09red/ssc:100736677%09red
Non-homologous end-joining	KEGG PATHWAY	ssc03450	1	13	0.155015	0.703105	ENSSSCG00000009540	ssc:100155891|	100155891|	LIG4|	http://www.genome.jp/kegg-bin/show_pathway?ssc03450/ssc:100155891%09red
Lysosome	KEGG PATHWAY	ssc04142	3	115	0.167875	0.735178	ENSSSCG00000008056|ENSSSCG00000004486|ENSSSCG00000007033	ssc:100518959|ssc:100516051|ssc:100525135|	100518959|100516051|100525135|	ATP6V0C|SLC17A5|AP3M2|	http://www.genome.jp/kegg-bin/show_pathway?ssc04142/ssc:100525135%09red/ssc:100516051%09red/ssc:100518959%09red
AMPK signaling pathway	KEGG PATHWAY	ssc04152	3	118	0.176695	0.748009	ENSSSCG00000008060|ENSSSCG00000011106|ENSSSCG00000015842	ssc:100192445|ssc:397449|ssc:397656|	100192445|397449|397656|	PDPK1|CREB1|PPP2CA|	http://www.genome.jp/kegg-bin/show_pathway?ssc04152/ssc:397656%09red/ssc:397449%09red/ssc:100192445%09red
Dopaminergic synapse	KEGG PATHWAY	ssc04728	3	120	0.182645	0.748256	ENSSSCG00000022163|ENSSSCG00000011106|ENSSSCG00000015842	ssc:100736677|ssc:397449|ssc:397656|	100736677|397449|397656|	GNAL|CREB1|PPP2CA|	http://www.genome.jp/kegg-bin/show_pathway?ssc04728/ssc:397656%09red/ssc:397449%09red/ssc:100736677%09red
Hepatitis C	KEGG PATHWAY	ssc05160	3	127	0.20387	0.807327	ENSSSCG00000008060|ENSSSCG00000007030|ENSSSCG00000015842	ssc:100192445|ssc:100101471|ssc:397656|	100192445|100101471|397656|	PDPK1|IKBKB|PPP2CA|	http://www.genome.jp/kegg-bin/show_pathway?ssc05160/ssc:397656%09red/ssc:100192445%09red/ssc:100101471%09red
Phenylalanine metabolism	KEGG PATHWAY	ssc00360	1	19	0.213887	0.807327	ENSSSCG00000018044	ssc:100526075|	100526075|	ALDH3A1|	http://www.genome.jp/kegg-bin/show_pathway?ssc00360/ssc:100526075%09red
Thyroid hormone synthesis	KEGG PATHWAY	ssc04918	2	72	0.221601	0.807327	ENSSSCG00000015844|ENSSSCG00000011106	ssc:396625|ssc:397449|	396625|397449|	GSR|CREB1|	http://www.genome.jp/kegg-bin/show_pathway?ssc04918/ssc:396625%09red/ssc:397449%09red
Insulin signaling pathway	KEGG PATHWAY	ssc04910	3	133	0.222492	0.807327	ENSSSCG00000008060|ENSSSCG00000013022|ENSSSCG00000007030	ssc:100192445|ssc:733659|ssc:100101471|	100192445|733659|100101471|	PDPK1|PYGM|IKBKB|	http://www.genome.jp/kegg-bin/show_pathway?ssc04910/ssc:733659%09red/ssc:100192445%09red/ssc:100101471%09red
Glycosaminoglycan biosynthesis - chondroitin sulfate / dermatan sulfate	KEGG PATHWAY	ssc00532	1	21	0.232588	0.808028	ENSSSCG00000000837	ssc:100157186|	100157186|	CHST11|	http://www.genome.jp/kegg-bin/show_pathway?ssc00532/ssc:100157186%09red
Histidine metabolism	KEGG PATHWAY	ssc00340	1	22	0.241772	0.808028	ENSSSCG00000018044	ssc:100526075|	100526075|	ALDH3A1|	http://www.genome.jp/kegg-bin/show_pathway?ssc00340/ssc:100526075%09red
Ascorbate and aldarate metabolism	KEGG PATHWAY	ssc00053	1	22	0.241772	0.808028	ENSSSCG00000030150	ssc:100627727|	100627727|	UGDH|	http://www.genome.jp/kegg-bin/show_pathway?ssc00053/ssc:100627727%09red
Mismatch repair	KEGG PATHWAY	ssc03430	1	24	0.259812	0.827027	ENSSSCG00000008790	ssc:100511271|	100511271|	RFC1|	http://www.genome.jp/kegg-bin/show_pathway?ssc03430/ssc:100511271%09red
Pentose and glucuronate interconversions	KEGG PATHWAY	ssc00040	1	26	0.277424	0.827027	ENSSSCG00000030150	ssc:100627727|	100627727|	UGDH|	http://www.genome.jp/kegg-bin/show_pathway?ssc00040/ssc:100627727%09red
Collecting duct acid secretion	KEGG PATHWAY	ssc04966	1	26	0.277424	0.827027	ENSSSCG00000008056	ssc:100518959|	100518959|	ATP6V0C|	http://www.genome.jp/kegg-bin/show_pathway?ssc04966/ssc:100518959%09red
Circadian rhythm	KEGG PATHWAY	ssc04710	1	26	0.277424	0.827027	ENSSSCG00000011106	ssc:397449|	397449|	CREB1|	http://www.genome.jp/kegg-bin/show_pathway?ssc04710/ssc:397449%09red
Hepatitis B	KEGG PATHWAY	ssc05161	3	151	0.280017	0.827027	ENSSSCG00000011106|ENSSSCG00000007026|ENSSSCG00000007030	ssc:397449|ssc:397651|ssc:100101471|	397449|397651|100101471|	CREB1|VDAC1P5, VDAC3, VDAC5P|IKBKB|	http://www.genome.jp/kegg-bin/show_pathway?ssc05161/ssc:397449%09red/ssc:397651%09red/ssc:100101471%09red
beta-Alanine metabolism	KEGG PATHWAY	ssc00410	1	28	0.294619	0.850127	ENSSSCG00000018044	ssc:100526075|	100526075|	ALDH3A1|	http://www.genome.jp/kegg-bin/show_pathway?ssc00410/ssc:100526075%09red
NF-kappa B signaling pathway	KEGG PATHWAY	ssc04064	2	90	0.301226	0.850127	ENSSSCG00000009542|ENSSSCG00000007030	ssc:100038026|ssc:100101471|	100038026|100101471|	TNFSF13B, BAFF|IKBKB|	http://www.genome.jp/kegg-bin/show_pathway?ssc04064/ssc:100038026%09red/ssc:100101471%09red
Base excision repair	KEGG PATHWAY	ssc03410	1	32	0.327795	0.853917	ENSSSCG00000007031	ssc:100526021|	100526021|	POLB|	http://www.genome.jp/kegg-bin/show_pathway?ssc03410/ssc:100526021%09red
Tyrosine metabolism	KEGG PATHWAY	ssc00350	1	33	0.335843	0.853917	ENSSSCG00000018044	ssc:100526075|	100526075|	ALDH3A1|	http://www.genome.jp/kegg-bin/show_pathway?ssc00350/ssc:100526075%09red
DNA replication	KEGG PATHWAY	ssc03030	1	35	0.351653	0.853917	ENSSSCG00000008790	ssc:100511271|	100511271|	RFC1|	http://www.genome.jp/kegg-bin/show_pathway?ssc03030/ssc:100511271%09red
Chemokine signaling pathway	KEGG PATHWAY	ssc04062	3	173	0.351768	0.853917	ENSSSCG00000016871|ENSSSCG00000007030|ENSSSCG00000013023	ssc:554303|ssc:100101471|ssc:100626093|	554303|100101471|100626093|	CCL28, MEC|IKBKB|RASGRP2|	http://www.genome.jp/kegg-bin/show_pathway?ssc04062/ssc:100626093%09red/ssc:554303%09red/ssc:100101471%09red
Regulation of autophagy	KEGG PATHWAY	ssc04140	1	38	0.374666	0.853917	ENSSSCG00000018045	ssc:100525780|	100525780|	ULK2|	http://www.genome.jp/kegg-bin/show_pathway?ssc04140/ssc:100525780%09red
T cell receptor signaling pathway	KEGG PATHWAY	ssc04660	2	107	0.37519	0.853917	ENSSSCG00000008060|ENSSSCG00000007030	ssc:100192445|ssc:100101471|	100192445|100101471|	PDPK1|IKBKB|	http://www.genome.jp/kegg-bin/show_pathway?ssc04660/ssc:100192445%09red/ssc:100101471%09red
TNF signaling pathway	KEGG PATHWAY	ssc04668	2	109	0.383701	0.853917	ENSSSCG00000011106|ENSSSCG00000007030	ssc:397449|ssc:100101471|	397449|100101471|	CREB1|IKBKB|	http://www.genome.jp/kegg-bin/show_pathway?ssc04668/ssc:397449%09red/ssc:100101471%09red
Aldosterone-regulated sodium reabsorption	KEGG PATHWAY	ssc04960	1	41	0.396866	0.853917	ENSSSCG00000008060	ssc:100192445|	100192445|	PDPK1|	http://www.genome.jp/kegg-bin/show_pathway?ssc04960/ssc:100192445%09red
Viral carcinogenesis	KEGG PATHWAY	ssc05203	3	189	0.403552	0.853917	ENSSSCG00000011106|ENSSSCG00000007026|ENSSSCG00000007031	ssc:397449|ssc:397651|ssc:100526021|	397449|397651|100526021|	CREB1|VDAC1P5, VDAC3, VDAC5P|POLB|	http://www.genome.jp/kegg-bin/show_pathway?ssc05203/ssc:397449%09red/ssc:397651%09red/ssc:100526021%09red
Nucleotide excision repair	KEGG PATHWAY	ssc03420	1	44	0.41828	0.853917	ENSSSCG00000008790	ssc:100511271|	100511271|	RFC1|	http://www.genome.jp/kegg-bin/show_pathway?ssc03420/ssc:100511271%09red
Neurotrophin signaling pathway	KEGG PATHWAY	ssc04722	2	118	0.421352	0.853917	ENSSSCG00000008060|ENSSSCG00000007030	ssc:100192445|ssc:100101471|	100192445|100101471|	PDPK1|IKBKB|	http://www.genome.jp/kegg-bin/show_pathway?ssc04722/ssc:100192445%09red/ssc:100101471%09red
Cocaine addiction	KEGG PATHWAY	ssc05030	1	46	0.432133	0.853917	ENSSSCG00000011106	ssc:397449|	397449|	CREB1|	http://www.genome.jp/kegg-bin/show_pathway?ssc05030/ssc:397449%09red
Type II diabetes mellitus	KEGG PATHWAY	ssc04930	1	48	0.445658	0.853917	ENSSSCG00000007030	ssc:100101471|	100101471|	IKBKB|	http://www.genome.jp/kegg-bin/show_pathway?ssc04930/ssc:100101471%09red
Metabolism of xenobiotics by cytochrome P450	KEGG PATHWAY	ssc00980	1	49	0.4523	0.853917	ENSSSCG00000018044	ssc:100526075|	100526075|	ALDH3A1|	http://www.genome.jp/kegg-bin/show_pathway?ssc00980/ssc:100526075%09red
Endometrial cancer	KEGG PATHWAY	ssc05213	1	49	0.4523	0.853917	ENSSSCG00000008060	ssc:100192445|	100192445|	PDPK1|	http://www.genome.jp/kegg-bin/show_pathway?ssc05213/ssc:100192445%09red
Drug metabolism - cytochrome P450	KEGG PATHWAY	ssc00982	1	49	0.4523	0.853917	ENSSSCG00000018044	ssc:100526075|	100526075|	ALDH3A1|	http://www.genome.jp/kegg-bin/show_pathway?ssc00982/ssc:100526075%09red
Glutathione metabolism	KEGG PATHWAY	ssc00480	1	50	0.458862	0.853917	ENSSSCG00000015844	ssc:396625|	396625|	GSR|	http://www.genome.jp/kegg-bin/show_pathway?ssc00480/ssc:396625%09red
Non-small cell lung cancer	KEGG PATHWAY	ssc05223	1	52	0.471752	0.853917	ENSSSCG00000008060	ssc:100192445|	100192445|	PDPK1|	http://www.genome.jp/kegg-bin/show_pathway?ssc05223/ssc:100192445%09red
Osteoclast differentiation	KEGG PATHWAY	ssc04380	2	133	0.481341	0.853917	ENSSSCG00000011106|ENSSSCG00000007030	ssc:397449|ssc:100101471|	397449|100101471|	CREB1|IKBKB|	http://www.genome.jp/kegg-bin/show_pathway?ssc04380/ssc:397449%09red/ssc:100101471%09red
FoxO signaling pathway	KEGG PATHWAY	ssc04068	2	133	0.481341	0.853917	ENSSSCG00000008060|ENSSSCG00000007030	ssc:100192445|ssc:100101471|	100192445|100101471|	PDPK1|IKBKB|	http://www.genome.jp/kegg-bin/show_pathway?ssc04068/ssc:100192445%09red/ssc:100101471%09red
Acute myeloid leukemia	KEGG PATHWAY	ssc05221	1	54	0.484337	0.853917	ENSSSCG00000007030	ssc:100101471|	100101471|	IKBKB|	http://www.genome.jp/kegg-bin/show_pathway?ssc05221/ssc:100101471%09red
Glycolysis / Gluconeogenesis	KEGG PATHWAY	ssc00010	1	54	0.484337	0.853917	ENSSSCG00000018044	ssc:100526075|	100526075|	ALDH3A1|	http://www.genome.jp/kegg-bin/show_pathway?ssc00010/ssc:100526075%09red
Inositol phosphate metabolism	KEGG PATHWAY	ssc00562	1	57	0.502655	0.853917	ENSSSCG00000024162	ssc:100623875|	100623875|	IMPA2|	http://www.genome.jp/kegg-bin/show_pathway?ssc00562/ssc:100623875%09red
Adrenergic signaling in cardiomyocytes	KEGG PATHWAY	ssc04261	2	141	0.511742	0.853917	ENSSSCG00000011106|ENSSSCG00000015842	ssc:397449|ssc:397656|	397449|397656|	CREB1|PPP2CA|	http://www.genome.jp/kegg-bin/show_pathway?ssc04261/ssc:397656%09red/ssc:397449%09red
Long-term depression	KEGG PATHWAY	ssc04730	1	59	0.514506	0.853917	ENSSSCG00000015842	ssc:397656|	397656|	PPP2CA|	http://www.genome.jp/kegg-bin/show_pathway?ssc04730/ssc:397656%09red
Synaptic vesicle cycle	KEGG PATHWAY	ssc04721	1	59	0.514506	0.853917	ENSSSCG00000008056	ssc:100518959|	100518959|	ATP6V0C|	http://www.genome.jp/kegg-bin/show_pathway?ssc04721/ssc:100518959%09red
Ribosome	KEGG PATHWAY	ssc03010	2	143	0.519158	0.853917	ENSSSCG00000009539|ENSSSCG00000025192	ssc:100135671|ssc:100627537|	100135671|100627537|	RPL5|RPL9|	http://www.genome.jp/kegg-bin/show_pathway?ssc03010/ssc:100135671%09red/ssc:100627537%09red
Chemical carcinogenesis	KEGG PATHWAY	ssc05204	1	60	0.520326	0.853917	ENSSSCG00000018044	ssc:100526075|	100526075|	ALDH3A1|	http://www.genome.jp/kegg-bin/show_pathway?ssc05204/ssc:100526075%09red
Cytosolic DNA-sensing pathway	KEGG PATHWAY	ssc04623	1	61	0.526075	0.853917	ENSSSCG00000007030	ssc:100101471|	100101471|	IKBKB|	http://www.genome.jp/kegg-bin/show_pathway?ssc04623/ssc:100101471%09red
Pancreatic cancer	KEGG PATHWAY	ssc05212	1	63	0.53737	0.853917	ENSSSCG00000007030	ssc:100101471|	100101471|	IKBKB|	http://www.genome.jp/kegg-bin/show_pathway?ssc05212/ssc:100101471%09red
Fc epsilon RI signaling pathway	KEGG PATHWAY	ssc04664	1	63	0.53737	0.853917	ENSSSCG00000008060	ssc:100192445|	100192445|	PDPK1|	http://www.genome.jp/kegg-bin/show_pathway?ssc04664/ssc:100192445%09red
Parkinson's disease	KEGG PATHWAY	ssc05012	2	151	0.548064	0.853917	ENSSSCG00000022163|ENSSSCG00000007026	ssc:100736677|ssc:397651|	100736677|397651|	GNAL|VDAC1P5, VDAC3, VDAC5P|	http://www.genome.jp/kegg-bin/show_pathway?ssc05012/ssc:397651%09red/ssc:100736677%09red
Amphetamine addiction	KEGG PATHWAY	ssc05031	1	65	0.548396	0.853917	ENSSSCG00000011106	ssc:397449|	397449|	CREB1|	http://www.genome.jp/kegg-bin/show_pathway?ssc05031/ssc:397449%09red
PI3K-Akt signaling pathway	KEGG PATHWAY	ssc04151	4	328	0.56302	0.853917	ENSSSCG00000008060|ENSSSCG00000011106|ENSSSCG00000007030|ENSSSCG00000015842	ssc:100192445|ssc:397449|ssc:100101471|ssc:397656|	100192445|397449|100101471|397656|	PDPK1|CREB1|IKBKB|PPP2CA|	http://www.genome.jp/kegg-bin/show_pathway?ssc04151/ssc:397656%09red/ssc:397449%09red/ssc:100192445%09red/ssc:100101471%09red
RIG-I-like receptor signaling pathway	KEGG PATHWAY	ssc04622	1	68	0.564447	0.853917	ENSSSCG00000007030	ssc:100101471|	100101471|	IKBKB|	http://www.genome.jp/kegg-bin/show_pathway?ssc04622/ssc:100101471%09red
PPAR signaling pathway	KEGG PATHWAY	ssc03320	1	68	0.564447	0.853917	ENSSSCG00000008060	ssc:100192445|	100192445|	PDPK1|	http://www.genome.jp/kegg-bin/show_pathway?ssc03320/ssc:100192445%09red
Transcriptional misregulation in cancer	KEGG PATHWAY	ssc05202	2	156	0.565504	0.853917	ENSSSCG00000003876|ENSSSCG00000013019	ssc:100515210|ssc:100523533|	100515210|100523533|	|MEN1|	http://www.genome.jp/kegg-bin/show_pathway?ssc05202/ssc:100515210%09red/ssc:100523533%09red
Bile secretion	KEGG PATHWAY	ssc04976	1	69	0.56967	0.853917	ENSSSCG00000024342	ssc:100126277|	100126277|	AQP4|	http://www.genome.jp/kegg-bin/show_pathway?ssc04976/ssc:100126277%09red
Chronic myeloid leukemia	KEGG PATHWAY	ssc05220	1	69	0.56967	0.853917	ENSSSCG00000007030	ssc:100101471|	100101471|	IKBKB|	http://www.genome.jp/kegg-bin/show_pathway?ssc05220/ssc:100101471%09red
Adipocytokine signaling pathway	KEGG PATHWAY	ssc04920	1	70	0.57483	0.853917	ENSSSCG00000007030	ssc:100101471|	100101471|	IKBKB|	http://www.genome.jp/kegg-bin/show_pathway?ssc04920/ssc:100101471%09red
MAPK signaling pathway	KEGG PATHWAY	ssc04010	3	249	0.582263	0.853917	ENSSSCG00000013020|ENSSSCG00000007030|ENSSSCG00000013023	ssc:100523716|ssc:100101471|ssc:100626093|	100523716|100101471|100626093|	MAP4K2|IKBKB|RASGRP2|	http://www.genome.jp/kegg-bin/show_pathway?ssc04010/ssc:100626093%09red/ssc:100523716%09red/ssc:100101471%09red
B cell receptor signaling pathway	KEGG PATHWAY	ssc04662	1	72	0.584967	0.853917	ENSSSCG00000007030	ssc:100101471|	100101471|	IKBKB|	http://www.genome.jp/kegg-bin/show_pathway?ssc04662/ssc:100101471%09red
TGF-beta signaling pathway	KEGG PATHWAY	ssc04350	1	74	0.594862	0.858495	ENSSSCG00000015842	ssc:397656|	397656|	PPP2CA|	http://www.genome.jp/kegg-bin/show_pathway?ssc04350/ssc:397656%09red
cGMP-PKG signaling pathway	KEGG PATHWAY	ssc04022	2	167	0.602153	0.859253	ENSSSCG00000011106|ENSSSCG00000007026	ssc:397449|ssc:397651|	397449|397651|	CREB1|VDAC1P5, VDAC3, VDAC5P|	http://www.genome.jp/kegg-bin/show_pathway?ssc04022/ssc:397449%09red/ssc:397651%09red
Phosphatidylinositol signaling system	KEGG PATHWAY	ssc04070	1	79	0.618585	0.872893	ENSSSCG00000024162	ssc:100623875|	100623875|	IMPA2|	http://www.genome.jp/kegg-bin/show_pathway?ssc04070/ssc:100623875%09red
mRNA surveillance pathway	KEGG PATHWAY	ssc03015	1	84	0.640924	0.87871	ENSSSCG00000015842	ssc:397656|	397656|	PPP2CA|	http://www.genome.jp/kegg-bin/show_pathway?ssc03015/ssc:397656%09red
Calcium signaling pathway	KEGG PATHWAY	ssc04020	2	182	0.648307	0.87871	ENSSSCG00000022163|ENSSSCG00000007026	ssc:100736677|ssc:397651|	100736677|397651|	GNAL|VDAC1P5, VDAC3, VDAC5P|	http://www.genome.jp/kegg-bin/show_pathway?ssc04020/ssc:397651%09red/ssc:100736677%09red
Insulin secretion	KEGG PATHWAY	ssc04911	1	86	0.64949	0.87871	ENSSSCG00000011106	ssc:397449|	397449|	CREB1|	http://www.genome.jp/kegg-bin/show_pathway?ssc04911/ssc:397449%09red
Small cell lung cancer	KEGG PATHWAY	ssc05222	1	88	0.657852	0.87871	ENSSSCG00000007030	ssc:100101471|	100101471|	IKBKB|	http://www.genome.jp/kegg-bin/show_pathway?ssc05222/ssc:100101471%09red
Gap junction	KEGG PATHWAY	ssc04540	1	90	0.666015	0.87871	ENSSSCG00000026022	ssc:100153507|	100153507|	TUBB2B|	http://www.genome.jp/kegg-bin/show_pathway?ssc04540/ssc:100153507%09red
Apoptosis	KEGG PATHWAY	ssc04210	1	91	0.670024	0.87871	ENSSSCG00000007030	ssc:100101471|	100101471|	IKBKB|	http://www.genome.jp/kegg-bin/show_pathway?ssc04210/ssc:100101471%09red
Huntington's disease	KEGG PATHWAY	ssc05016	2	190	0.671141	0.87871	ENSSSCG00000011106|ENSSSCG00000007026	ssc:397449|ssc:397651|	397449|397651|	CREB1|VDAC1P5, VDAC3, VDAC5P|	http://www.genome.jp/kegg-bin/show_pathway?ssc05016/ssc:397449%09red/ssc:397651%09red
Melanogenesis	KEGG PATHWAY	ssc04916	1	95	0.685585	0.884903	ENSSSCG00000011106	ssc:397449|	397449|	CREB1|	http://www.genome.jp/kegg-bin/show_pathway?ssc04916/ssc:397449%09red
Estrogen signaling pathway	KEGG PATHWAY	ssc04915	1	97	0.693089	0.884903	ENSSSCG00000011106	ssc:397449|	397449|	CREB1|	http://www.genome.jp/kegg-bin/show_pathway?ssc04915/ssc:397449%09red
Circadian entrainment	KEGG PATHWAY	ssc04713	1	98	0.696774	0.884903	ENSSSCG00000011106	ssc:397449|	397449|	CREB1|	http://www.genome.jp/kegg-bin/show_pathway?ssc04713/ssc:397449%09red
Toll-like receptor signaling pathway	KEGG PATHWAY	ssc04620	1	101	0.707566	0.885568	ENSSSCG00000007030	ssc:100101471|	100101471|	IKBKB|	http://www.genome.jp/kegg-bin/show_pathway?ssc04620/ssc:100101471%09red
Amoebiasis	KEGG PATHWAY	ssc05146	1	107	0.728015	0.885568	ENSSSCG00000022163	ssc:100736677|	100736677|	GNAL|	http://www.genome.jp/kegg-bin/show_pathway?ssc05146/ssc:100736677%09red
Oocyte meiosis	KEGG PATHWAY	ssc04114	1	107	0.728015	0.885568	ENSSSCG00000015842	ssc:397656|	397656|	PPP2CA|	http://www.genome.jp/kegg-bin/show_pathway?ssc04114/ssc:397656%09red
Cholinergic synapse	KEGG PATHWAY	ssc04725	1	113	0.74704	0.885568	ENSSSCG00000011106	ssc:397449|	397449|	CREB1|	http://www.genome.jp/kegg-bin/show_pathway?ssc04725/ssc:397449%09red
Thyroid hormone signaling pathway	KEGG PATHWAY	ssc04919	1	113	0.74704	0.885568	ENSSSCG00000008060	ssc:100192445|	100192445|	PDPK1|	http://www.genome.jp/kegg-bin/show_pathway?ssc04919/ssc:100192445%09red
Cytokine-cytokine receptor interaction	KEGG PATHWAY	ssc04060	2	223	0.75287	0.885568	ENSSSCG00000009542|ENSSSCG00000016871	ssc:100038026|ssc:554303|	100038026|554303|	TNFSF13B, BAFF|CCL28, MEC|	http://www.genome.jp/kegg-bin/show_pathway?ssc04060/ssc:100038026%09red/ssc:554303%09red
Ras signaling pathway	KEGG PATHWAY	ssc04014	2	223	0.75287	0.885568	ENSSSCG00000007030|ENSSSCG00000013023	ssc:100101471|ssc:100626093|	100101471|100626093|	IKBKB|RASGRP2|	http://www.genome.jp/kegg-bin/show_pathway?ssc04014/ssc:100626093%09red/ssc:100101471%09red
Cell cycle	KEGG PATHWAY	ssc04110	1	115	0.753082	0.885568	ENSSSCG00000003876	ssc:100515210|	100515210|	|	http://www.genome.jp/kegg-bin/show_pathway?ssc04110/ssc:100515210%09red
Axon guidance	KEGG PATHWAY	ssc04360	1	119	0.764738	0.891025	ENSSSCG00000008054	ssc:100622906|	100622906|	NTN3|	http://www.genome.jp/kegg-bin/show_pathway?ssc04360/ssc:100622906%09red
Wnt signaling pathway	KEGG PATHWAY	ssc04310	1	128	0.788998	0.895427	ENSSSCG00000007029	ssc:100623371|	100623371|	DKK4|	http://www.genome.jp/kegg-bin/show_pathway?ssc04310/ssc:100623371%09red
Tight junction	KEGG PATHWAY	ssc04530	1	129	0.791534	0.895427	ENSSSCG00000015842	ssc:397656|	397656|	PPP2CA|	http://www.genome.jp/kegg-bin/show_pathway?ssc04530/ssc:397656%09red
Spliceosome	KEGG PATHWAY	ssc03040	1	129	0.791534	0.895427	ENSSSCG00000011684	ssc:100517309|	100517309|	U2SURP|	http://www.genome.jp/kegg-bin/show_pathway?ssc03040/ssc:100517309%09red
Platelet activation	KEGG PATHWAY	ssc04611	1	132	0.798964	0.895427	ENSSSCG00000013023	ssc:100626093|	100626093|	RASGRP2|	http://www.genome.jp/kegg-bin/show_pathway?ssc04611/ssc:100626093%09red
Oxidative phosphorylation	KEGG PATHWAY	ssc00190	1	134	0.803769	0.895427	ENSSSCG00000008056	ssc:100518959|	100518959|	ATP6V0C|	http://www.genome.jp/kegg-bin/show_pathway?ssc00190/ssc:100518959%09red
Hippo signaling pathway	KEGG PATHWAY	ssc04390	1	138	0.81304	0.897879	ENSSSCG00000015842	ssc:397656|	397656|	PPP2CA|	http://www.genome.jp/kegg-bin/show_pathway?ssc04390/ssc:397656%09red
Alcoholism	KEGG PATHWAY	ssc05034	1	143	0.824017	0.902156	ENSSSCG00000011106	ssc:397449|	397449|	CREB1|	http://www.genome.jp/kegg-bin/show_pathway?ssc05034/ssc:397449%09red
Non-alcoholic fatty liver disease (NAFLD)	KEGG PATHWAY	ssc04932	1	160	0.856754	0.92998	ENSSSCG00000007030	ssc:100101471|	100101471|	IKBKB|	http://www.genome.jp/kegg-bin/show_pathway?ssc04932/ssc:100101471%09red
Epstein-Barr virus infection	KEGG PATHWAY	ssc05169	1	189	0.899203	0.949871	ENSSSCG00000007030	ssc:100101471|	100101471|	IKBKB|	http://www.genome.jp/kegg-bin/show_pathway?ssc05169/ssc:100101471%09red
Proteoglycans in cancer	KEGG PATHWAY	ssc05205	1	192	0.902804	0.949871	ENSSSCG00000008060	ssc:100192445|	100192445|	PDPK1|	http://www.genome.jp/kegg-bin/show_pathway?ssc05205/ssc:100192445%09red
Focal adhesion	KEGG PATHWAY	ssc04510	1	194	0.905134	0.949871	ENSSSCG00000008060	ssc:100192445|	100192445|	PDPK1|	http://www.genome.jp/kegg-bin/show_pathway?ssc04510/ssc:100192445%09red
cAMP signaling pathway	KEGG PATHWAY	ssc04024	1	201	0.912857	0.949871	ENSSSCG00000011106	ssc:397449|	397449|	CREB1|	http://www.genome.jp/kegg-bin/show_pathway?ssc04024/ssc:397449%09red
Endocytosis	KEGG PATHWAY	ssc04144	1	206	0.917987	0.949871	ENSSSCG00000013017	ssc:100516416|	100516416|	EHD1|	http://www.genome.jp/kegg-bin/show_pathway?ssc04144/ssc:100516416%09red
Rap1 signaling pathway	KEGG PATHWAY	ssc04015	1	208	0.919954	0.949871	ENSSSCG00000013023	ssc:100626093|	100626093|	RASGRP2|	http://www.genome.jp/kegg-bin/show_pathway?ssc04015/ssc:100626093%09red
MicroRNAs in cancer	KEGG PATHWAY	ssc05206	1	228	0.937212	0.959887	ENSSSCG00000007030	ssc:100101471|	100101471|	IKBKB|	http://www.genome.jp/kegg-bin/show_pathway?ssc05206/ssc:100101471%09red
Pathways in cancer	KEGG PATHWAY	ssc05200	1	319	0.979258	0.994927	ENSSSCG00000007030	ssc:100101471|	100101471|	IKBKB|	http://www.genome.jp/kegg-bin/show_pathway?ssc05200/ssc:100101471%09red
Metabolic pathways	KEGG PATHWAY	ssc01100	6	1166	0.995494	0.999951	ENSSSCG00000029385|ENSSSCG00000030150|ENSSSCG00000013022|ENSSSCG00000018044|ENSSSCG00000008056|ENSSSCG00000024162	ssc:100627627|ssc:100627727|ssc:733659|ssc:100526075|ssc:100518959|ssc:100623875|	100627627|100627727|733659|100526075|100518959|100623875|	LIAS|UGDH|PYGM|ALDH3A1|ATP6V0C|IMPA2|	http://www.genome.jp/kegg-bin/show_pathway?ssc01100/ssc:100623875%09red/ssc:733659%09red/ssc:100526075%09red/ssc:100627627%09red/ssc:100518959%09red/ssc:100627727%09red
Olfactory transduction	KEGG PATHWAY	ssc04740	1	810	0.999951	0.999951	ENSSSCG00000022163	ssc:100736677|	100736677|	GNAL|	http://www.genome.jp/kegg-bin/show_pathway?ssc04740/ssc:100736677%09red
--------------------
#Term	Database	ID	Input number	Background number	P-Value	Corrected P-Value	Input	KO	Entrez_ID	KO_name	Hyperlink
--------------------
#Term	Database	ID	Input number	Background number	P-Value	Corrected P-Value	Input	KO	Entrez_ID	KO_name	Hyperlink
--------------------

## Sheet: VR2332 Up
##Databases: KEGG PATHWAY
##Statistical test method: hypergeometric test / Fisher's exact test
##FDR correction method: Benjamini and Hochberg
#Term	Database	ID	Input number	Background number	P-Value	Corrected P-Value	Input	KO	Entrez_ID	KO_name	Hyperlink
Thyroid hormone signaling pathway	KEGG PATHWAY	ssc04919	11	113	0.00120663	0.22202	ENSSSCG00000011714|ENSSSCG00000003395|ENSSSCG00000016192|ENSSSCG00000007833|ENSSSCG00000007356|ENSSSCG00000016058|ENSSSCG00000023787|ENSSSCG00000009465|ENSSSCG00000009464|ENSSSCG00000025418|ENSSSCG00000016057	ssc:100524586|ssc:100518131|ssc:397119|ssc:100522792|ssc:100152497|ssc:396655|ssc:100524586|ssc:100523015|ssc:100523202|ssc:100524586|ssc:396655|	100524586|100518131|397119|100522792|100152497|396655|100524586|100523015|100523202|100524586|396655|	MED12L|PIK3CD|PLCD4| |PLCG1|STAT1|MED12L|TBC1D4| |MED12L|STAT1|	http://www.genome.jp/kegg-bin/show_pathway?ssc04919/ssc:100518131%09red/ssc:100522792%09red/ssc:100523015%09red/ssc:100523202%09red/ssc:100524586%09red/ssc:396655%09red/ssc:100152497%09red/ssc:397119%09red
Fc gamma R-mediated phagocytosis	KEGG PATHWAY	ssc04666	7	81	0.0159272	0.741713	ENSSSCG00000003395|ENSSSCG00000003839|ENSSSCG00000003577|ENSSSCG00000028759|ENSSSCG00000007356|ENSSSCG00000008444|ENSSSCG00000007833	ssc:100518131|ssc:100512419|ssc:100512789|ssc:100153066|ssc:100152497|ssc:100524932|ssc:100522792|	100518131|100512419|100512789|100153066|100152497|100524932|100522792|	PIK3CD|PPAP2B|WASF2|ASAP1|PLCG1|PRKCE| |	http://www.genome.jp/kegg-bin/show_pathway?ssc04666/ssc:100518131%09red/ssc:100522792%09red/ssc:100512419%09red/ssc:100524932%09red/ssc:100512789%09red/ssc:100153066%09red/ssc:100152497%09red
Type II diabetes mellitus	KEGG PATHWAY	ssc04930	5	48	0.0203646	0.741713	ENSSSCG00000010380|ENSSSCG00000027855|ENSSSCG00000003395|ENSSSCG00000025729|ENSSSCG00000008444	ssc:396610|ssc:100307052|ssc:100518131|ssc:100512686|ssc:100524932|	396610|100307052|100518131|100512686|100524932|	MAPK8, JNK, JNK1|SOCS1|PIK3CD|IRS1|PRKCE|	http://www.genome.jp/kegg-bin/show_pathway?ssc04930/ssc:100524932%09red/ssc:100518131%09red/ssc:396610%09red/ssc:100307052%09red/ssc:100512686%09red
Glycosaminoglycan biosynthesis - keratan sulfate	KEGG PATHWAY	ssc00533	3	17	0.0204996	0.741713	ENSSSCG00000029461|ENSSSCG00000002283|ENSSSCG00000026793	ssc:396619|ssc:396933|ssc:100736821|	396619|396933|100736821|	ST3GAL3, ST3GAL-III|FUT8|B4GALT2|	http://www.genome.jp/kegg-bin/show_pathway?ssc00533/ssc:396619%09red/ssc:100736821%09red/ssc:396933%09red
Prolactin signaling pathway	KEGG PATHWAY	ssc04917	6	67	0.0214692	0.741713	ENSSSCG00000010380|ENSSSCG00000003395|ENSSSCG00000014277|ENSSSCG00000027855|ENSSSCG00000016058|ENSSSCG00000016057	ssc:396610|ssc:100518131|ssc:396611|ssc:100307052|ssc:396655|ssc:396655|	396610|100518131|396611|100307052|396655|396655|	MAPK8, JNK, JNK1|PIK3CD|IRF1, IRF-1|SOCS1|STAT1|STAT1|	http://www.genome.jp/kegg-bin/show_pathway?ssc04917/ssc:100518131%09red/ssc:396655%09red/ssc:396610%09red/ssc:100307052%09red/ssc:396611%09red
Adipocytokine signaling pathway	KEGG PATHWAY	ssc04920	6	70	0.0256141	0.741713	ENSSSCG00000010380|ENSSSCG00000003837|ENSSSCG00000000185|ENSSSCG00000026816|ENSSSCG00000025729|ENSSSCG00000009840	ssc:396610|ssc:397504|ssc:414426|ssc:100620540|ssc:100512686|ssc:100156537|	396610|397504|414426|100620540|100512686|100156537|	MAPK8, JNK, JNK1|PRKAA2, AMPKA2|PRKAG1| |IRS1|PRKAB1|	http://www.genome.jp/kegg-bin/show_pathway?ssc04920/ssc:100620540%09red/ssc:100156537%09red/ssc:396610%09red/ssc:397504%09red/ssc:100512686%09red/ssc:414426%09red
Toxoplasmosis	KEGG PATHWAY	ssc05145	8	115	0.0307675	0.741713	ENSSSCG00000010380|ENSSSCG00000003395|ENSSSCG00000027855|ENSSSCG00000024344|ENSSSCG00000017755|ENSSSCG00000004110|ENSSSCG00000016058|ENSSSCG00000016057	ssc:396610|ssc:100518131|ssc:100307052|ssc:414371|ssc:396859|ssc:100156182|ssc:396655|ssc:396655|	396610|100518131|100307052|414371|396859|100156182|396655|396655|	MAPK8, JNK, JNK1|PIK3CD|SOCS1|CCR5|NOS2, INOS, NOS2a|TAB2|STAT1|STAT1|	http://www.genome.jp/kegg-bin/show_pathway?ssc05145/ssc:100518131%09red/ssc:100156182%09red/ssc:414371%09red/ssc:100307052%09red/ssc:396610%09red/ssc:396859%09red/ssc:396655%09red
Melanogenesis	KEGG PATHWAY	ssc04916	7	95	0.0326463	0.741713	ENSSSCG00000000183|ENSSSCG00000000182|ENSSSCG00000001050|ENSSSCG00000005285|ENSSSCG00000027952|ENSSSCG00000007833|ENSSSCG00000030680	ssc:100525462|ssc:100126276|ssc:396915|ssc:654405|ssc:100155970|ssc:100522792|ssc:100170126|	100525462|100126276|396915|654405|100155970|100522792|100170126|	WNT1|WNT10B|EDN1, EDN, ET-1, ET1, PPET1|GNAQ|ADCY5| |LEF1|	http://www.genome.jp/kegg-bin/show_pathway?ssc04916/ssc:100525462%09red/ssc:100522792%09red/ssc:100170126%09red/ssc:396915%09red/ssc:100155970%09red/ssc:654405%09red/ssc:100126276%09red
mTOR signaling pathway	KEGG PATHWAY	ssc04150	5	60	0.0440206	0.741713	ENSSSCG00000003395|ENSSSCG00000025729|ENSSSCG00000007833|ENSSSCG00000005209|ENSSSCG00000003837	ssc:100518131|ssc:100512686|ssc:100522792|ssc:100038023|ssc:397504|	100518131|100512686|100522792|100038023|397504|	PIK3CD|IRS1| |RPS6|PRKAA2, AMPKA2|	http://www.genome.jp/kegg-bin/show_pathway?ssc04150/ssc:100518131%09red/ssc:100038023%09red/ssc:100522792%09red/ssc:397504%09red/ssc:100512686%09red
Inflammatory bowel disease (IBD)	KEGG PATHWAY	ssc05321	5	62	0.0490871	0.741713	ENSSSCG00000023016|ENSSSCG00000016058|ENSSSCG00000014278|ENSSSCG00000016057|ENSSSCG00000021437	ssc:397261|ssc:396655|ssc:397409|ssc:396655|ssc:397261|	397261|396655|397409|396655|397261|	STAT4|STAT1|IL-5, IL5|STAT1|STAT4|	http://www.genome.jp/kegg-bin/show_pathway?ssc05321/ssc:396655%09red/ssc:397261%09red/ssc:397409%09red
Pancreatic cancer	KEGG PATHWAY	ssc05212	5	63	0.0517438	0.741713	ENSSSCG00000010380|ENSSSCG00000003395|ENSSSCG00000016058|ENSSSCG00000029741|ENSSSCG00000016057	ssc:396610|ssc:100518131|ssc:396655|ssc:100622254|ssc:396655|	396610|100518131|396655|100622254|396655|	MAPK8, JNK, JNK1|PIK3CD|STAT1|RALA|STAT1|	http://www.genome.jp/kegg-bin/show_pathway?ssc05212/ssc:100622254%09red/ssc:396655%09red/ssc:100518131%09red/ssc:396610%09red
Circadian rhythm	KEGG PATHWAY	ssc04710	3	26	0.0540362	0.741713	ENSSSCG00000009840|ENSSSCG00000000185|ENSSSCG00000003837	ssc:100156537|ssc:414426|ssc:397504|	100156537|414426|397504|	PRKAB1|PRKAG1|PRKAA2, AMPKA2|	http://www.genome.jp/kegg-bin/show_pathway?ssc04710/ssc:414426%09red/ssc:397504%09red/ssc:100156537%09red
Thyroid cancer	KEGG PATHWAY	ssc05216	3	26	0.0540362	0.741713	ENSSSCG00000015576|ENSSSCG00000010211|ENSSSCG00000030680	ssc:100520507|ssc:100155896|ssc:100170126|	100520507|100155896|100170126|	TPR|CCDC6|LEF1|	http://www.genome.jp/kegg-bin/show_pathway?ssc05216/ssc:100520507%09red/ssc:100155896%09red/ssc:100170126%09red
Insulin signaling pathway	KEGG PATHWAY	ssc04910	8	133	0.0601404	0.741713	ENSSSCG00000010380|ENSSSCG00000003395|ENSSSCG00000003837|ENSSSCG00000000185|ENSSSCG00000027855|ENSSSCG00000025729|ENSSSCG00000009840|ENSSSCG00000005209	ssc:396610|ssc:100518131|ssc:397504|ssc:414426|ssc:100307052|ssc:100512686|ssc:100156537|ssc:100038023|	396610|100518131|397504|414426|100307052|100512686|100156537|100038023|	MAPK8, JNK, JNK1|PIK3CD|PRKAA2, AMPKA2|PRKAG1|SOCS1|IRS1|PRKAB1|RPS6|	http://www.genome.jp/kegg-bin/show_pathway?ssc04910/ssc:100518131%09red/ssc:100156537%09red/ssc:396610%09red/ssc:100038023%09red/ssc:397504%09red/ssc:100307052%09red/ssc:100512686%09red/ssc:414426%09red
Inflammatory mediator regulation of TRP channels	KEGG PATHWAY	ssc04750	7	110	0.0604658	0.741713	ENSSSCG00000010380|ENSSSCG00000003395|ENSSSCG00000007356|ENSSSCG00000005285|ENSSSCG00000027952|ENSSSCG00000008444|ENSSSCG00000007833	ssc:396610|ssc:100518131|ssc:100152497|ssc:654405|ssc:100155970|ssc:100524932|ssc:100522792|	396610|100518131|100152497|654405|100155970|100524932|100522792|	MAPK8, JNK, JNK1|PIK3CD|PLCG1|GNAQ|ADCY5|PRKCE| |	http://www.genome.jp/kegg-bin/show_pathway?ssc04750/ssc:100518131%09red/ssc:100522792%09red/ssc:100524932%09red/ssc:396610%09red/ssc:100155970%09red/ssc:654405%09red/ssc:100152497%09red
Other types of O-glycan biosynthesis	KEGG PATHWAY	ssc00514	3	30	0.0740411	0.776428	ENSSSCG00000029461|ENSSSCG00000026793|ENSSSCG00000002397	ssc:396619|ssc:100736821|ssc:100155173|	396619|100736821|100155173|	ST3GAL3, ST3GAL-III|B4GALT2|POMT2|	http://www.genome.jp/kegg-bin/show_pathway?ssc00514/ssc:396619%09red/ssc:100736821%09red/ssc:100155173%09red
Pathways in cancer	KEGG PATHWAY	ssc05200	15	319	0.0756573	0.776428	ENSSSCG00000000183|ENSSSCG00000000182|ENSSSCG00000015576|ENSSSCG00000010211|ENSSSCG00000010380|ENSSSCG00000015815|ENSSSCG00000017755|ENSSSCG00000029741|ENSSSCG00000016057|ENSSSCG00000007356|ENSSSCG00000016058|ENSSSCG00000003395|ENSSSCG00000009544|ENSSSCG00000007833|ENSSSCG00000030680	ssc:100525462|ssc:100126276|ssc:100520507|ssc:100155896|ssc:396610|ssc:100153248|ssc:396859|ssc:100622254|ssc:396655|ssc:100152497|ssc:396655|ssc:100518131|ssc:100515336|ssc:100522792|ssc:100170126|	100525462|100126276|100520507|100155896|396610|100153248|396859|100622254|396655|100152497|396655|100518131|100515336|100522792|100170126|	WNT1|WNT10B|TPR|CCDC6|MAPK8, JNK, JNK1|FGFR1|NOS2, INOS, NOS2a|RALA|STAT1|PLCG1|STAT1|PIK3CD|COL4A1| |LEF1|	http://www.genome.jp/kegg-bin/show_pathway?ssc05200/ssc:100520507%09red/ssc:100518131%09red/ssc:100522792%09red/ssc:100155896%09red/ssc:100170126%09red/ssc:100525462%09red/ssc:396610%09red/ssc:100515336%09red/ssc:100153248%09red/ssc:396859%09red/ssc:100622254%09red/ssc:396655%09red/ssc:100152497%09red/ssc:100126276%09red
RNA degradation	KEGG PATHWAY	ssc03018	5	71	0.075955	0.776428	ENSSSCG00000016193|ENSSSCG00000006063|ENSSSCG00000008399|ENSSSCG00000022880|ENSSSCG00000025233	ssc:100153939|ssc:100153958|ssc:100642182|ssc:100642182|ssc:100642182|	100153939|100153958|100642182|100642182|100642182|	RQCD1|PABPC1|PNPT1|PNPT1|PNPT1|	http://www.genome.jp/kegg-bin/show_pathway?ssc03018/ssc:100642182%09red/ssc:100153939%09red/ssc:100153958%09red
Ribosome	KEGG PATHWAY	ssc03010	8	143	0.0821971	0.793656	ENSSSCG00000022428|ENSSSCG00000006008|ENSSSCG00000003746|ENSSSCG00000006899|ENSSSCG00000028020|ENSSSCG00000005104|ENSSSCG00000024693|ENSSSCG00000005209	ssc:641351|ssc:100624157|ssc:641351|ssc:100135671|ssc:100624945|ssc:414415|ssc:100512482|ssc:100038023|	641351|100624157|641351|100135671|100624945|414415|100512482|100038023|	RPSA, LAMR1|RPS2E|RPSA, LAMR1|RPL5|MRPS9|MRPS11|MRPL17|RPS6|	http://www.genome.jp/kegg-bin/show_pathway?ssc03010/ssc:641351%09red/ssc:100512482%09red/ssc:100624157%09red/ssc:100038023%09red/ssc:100135671%09red/ssc:414415%09red/ssc:100624945%09red
Hepatitis B	KEGG PATHWAY	ssc05161	8	151	0.102866	0.793656	ENSSSCG00000023016|ENSSSCG00000010380|ENSSSCG00000003395|ENSSSCG00000007833|ENSSSCG00000006062|ENSSSCG00000016058|ENSSSCG00000021437|ENSSSCG00000016057	ssc:397261|ssc:396610|ssc:100518131|ssc:100522792|ssc:780440|ssc:396655|ssc:397261|ssc:396655|	397261|396610|100518131|100522792|780440|396655|397261|396655|	STAT4|MAPK8, JNK, JNK1|PIK3CD| |YWHAZ|STAT1|STAT4|STAT1|	http://www.genome.jp/kegg-bin/show_pathway?ssc05161/ssc:100518131%09red/ssc:100522792%09red/ssc:396610%09red/ssc:780440%09red/ssc:397261%09red/ssc:396655%09red
Phosphatidylinositol signaling system	KEGG PATHWAY	ssc04070	5	79	0.10529	0.793656	ENSSSCG00000003395|ENSSSCG00000017615|ENSSSCG00000016192|ENSSSCG00000007833|ENSSSCG00000007356	ssc:100518131|ssc:100312967|ssc:397119|ssc:100522792|ssc:100152497|	100518131|100312967|397119|100522792|100152497|	PIK3CD|DGKE|PLCD4| |PLCG1|	http://www.genome.jp/kegg-bin/show_pathway?ssc04070/ssc:100518131%09red/ssc:100312967%09red/ssc:100522792%09red/ssc:100152497%09red/ssc:397119%09red
Hepatitis C	KEGG PATHWAY	ssc05160	7	127	0.105529	0.793656	ENSSSCG00000010380|ENSSSCG00000003395|ENSSSCG00000014277|ENSSSCG00000014298|ENSSSCG00000016058|ENSSSCG00000025181|ENSSSCG00000016057	ssc:396610|ssc:100518131|ssc:396611|ssc:397656|ssc:396655|ssc:100523731|ssc:396655|	396610|100518131|396611|397656|396655|100523731|396655|	MAPK8, JNK, JNK1|PIK3CD|IRF1, IRF-1|PPP2CA|STAT1| |STAT1|	http://www.genome.jp/kegg-bin/show_pathway?ssc05160/ssc:100518131%09red/ssc:100523731%09red/ssc:396611%09red/ssc:397656%09red/ssc:396655%09red/ssc:396610%09red
Jak-STAT signaling pathway	KEGG PATHWAY	ssc04630	8	153	0.108448	0.793656	ENSSSCG00000023016|ENSSSCG00000003395|ENSSSCG00000027855|ENSSSCG00000014278|ENSSSCG00000026816|ENSSSCG00000016058|ENSSSCG00000021437|ENSSSCG00000016057	ssc:397261|ssc:100518131|ssc:100307052|ssc:397409|ssc:100620540|ssc:396655|ssc:397261|ssc:396655|	397261|100518131|100307052|397409|100620540|396655|397261|396655|	STAT4|PIK3CD|SOCS1|IL-5, IL5| |STAT1|STAT4|STAT1|	http://www.genome.jp/kegg-bin/show_pathway?ssc04630/ssc:100518131%09red/ssc:100620540%09red/ssc:100307052%09red/ssc:397261%09red/ssc:396655%09red/ssc:397409%09red
HIF-1 signaling pathway	KEGG PATHWAY	ssc04066	6	104	0.110257	0.793656	ENSSSCG00000003395|ENSSSCG00000001050|ENSSSCG00000017755|ENSSSCG00000007356|ENSSSCG00000007833|ENSSSCG00000005209	ssc:100518131|ssc:396915|ssc:396859|ssc:100152497|ssc:100522792|ssc:100038023|	100518131|396915|396859|100152497|100522792|100038023|	PIK3CD|EDN1, EDN, ET-1, ET1, PPET1|NOS2, INOS, NOS2a|PLCG1| |RPS6|	http://www.genome.jp/kegg-bin/show_pathway?ssc04066/ssc:100518131%09red/ssc:100522792%09red/ssc:100038023%09red/ssc:396915%09red/ssc:396859%09red/ssc:100152497%09red
Long-term depression	KEGG PATHWAY	ssc04730	4	59	0.117786	0.793656	ENSSSCG00000005285|ENSSSCG00000006215|ENSSSCG00000007833|ENSSSCG00000014298	ssc:654405|ssc:100127468|ssc:100522792|ssc:397656|	654405|100127468|100522792|397656|	GNAQ|CRH| |PPP2CA|	http://www.genome.jp/kegg-bin/show_pathway?ssc04730/ssc:654405%09red/ssc:100522792%09red/ssc:100127468%09red/ssc:397656%09red
Amoebiasis	KEGG PATHWAY	ssc05146	6	107	0.121098	0.793656	ENSSSCG00000003395|ENSSSCG00000005285|ENSSSCG00000017755|ENSSSCG00000016856|ENSSSCG00000009544|ENSSSCG00000007833	ssc:100518131|ssc:654405|ssc:396859|ssc:100037951|ssc:100515336|ssc:100522792|	100518131|654405|396859|100037951|100515336|100522792|	PIK3CD|GNAQ|NOS2, INOS, NOS2a| |COL4A1| |	http://www.genome.jp/kegg-bin/show_pathway?ssc05146/ssc:100518131%09red/ssc:100522792%09red/ssc:100515336%09red/ssc:396859%09red/ssc:654405%09red/ssc:100037951%09red
Osteoclast differentiation	KEGG PATHWAY	ssc04380	7	133	0.12482	0.793656	ENSSSCG00000010380|ENSSSCG00000003395|ENSSSCG00000027855|ENSSSCG00000004110|ENSSSCG00000016058|ENSSSCG00000021795|ENSSSCG00000016057	ssc:396610|ssc:100518131|ssc:100307052|ssc:100156182|ssc:396655|ssc:102161654|ssc:396655|	396610|100518131|100307052|100156182|396655|102161654|396655|	MAPK8, JNK, JNK1|PIK3CD|SOCS1|TAB2|STAT1| |STAT1|	http://www.genome.jp/kegg-bin/show_pathway?ssc04380/ssc:100518131%09red/ssc:102161654%09red/ssc:100156182%09red/ssc:100307052%09red/ssc:396610%09red/ssc:396655%09red
FoxO signaling pathway	KEGG PATHWAY	ssc04068	7	133	0.12482	0.793656	ENSSSCG00000010380|ENSSSCG00000003395|ENSSSCG00000003837|ENSSSCG00000000185|ENSSSCG00000025729|ENSSSCG00000009840|ENSSSCG00000014220	ssc:396610|ssc:100518131|ssc:397504|ssc:414426|ssc:100512686|ssc:100156537|ssc:100462745|	396610|100518131|397504|414426|100512686|100156537|100462745|	MAPK8, JNK, JNK1|PIK3CD|PRKAA2, AMPKA2|PRKAG1|IRS1|PRKAB1|ATG12|	http://www.genome.jp/kegg-bin/show_pathway?ssc04068/ssc:100518131%09red/ssc:100462745%09red/ssc:100156537%09red/ssc:396610%09red/ssc:397504%09red/ssc:100512686%09red/ssc:414426%09red
Ubiquitin mediated proteolysis	KEGG PATHWAY	ssc04120	7	134	0.128199	0.793656	ENSSSCG00000015853|ENSSSCG00000006137|ENSSSCG00000027855|ENSSSCG00000003334|ENSSSCG00000011393|ENSSSCG00000004032|ENSSSCG00000005103	ssc:100516114|ssc:100157283|ssc:100307052|ssc:100523610|ssc:100512631|ssc:733673|ssc:100521834|	100516114|100157283|100307052|100523610|100512631|733673|100521834|	|WWP1|SOCS1|UBE2J2|UBA7|PARK2, pdr-1|DET1|	http://www.genome.jp/kegg-bin/show_pathway?ssc04120/ssc:733673%09red/ssc:100157283%09red/ssc:100523610%09red/ssc:100307052%09red/ssc:100521834%09red/ssc:100512631%09red/ssc:100516114%09red
Oxytocin signaling pathway	KEGG PATHWAY	ssc04921	8	161	0.132384	0.793656	ENSSSCG00000003395|ENSSSCG00000003837|ENSSSCG00000000185|ENSSSCG00000027952|ENSSSCG00000005285|ENSSSCG00000025095|ENSSSCG00000009840|ENSSSCG00000007833	ssc:100518131|ssc:397504|ssc:414426|ssc:100155970|ssc:654405|ssc:397190|ssc:100156537|ssc:100522792|	100518131|397504|414426|100155970|654405|397190|100156537|100522792|	PIK3CD|PRKAA2, AMPKA2|PRKAG1|ADCY5|GNAQ|PPP1R12A, MYPT1|PRKAB1| |	http://www.genome.jp/kegg-bin/show_pathway?ssc04921/ssc:100518131%09red/ssc:100522792%09red/ssc:100156537%09red/ssc:397504%09red/ssc:397190%09red/ssc:100155970%09red/ssc:654405%09red/ssc:414426%09red
Fc epsilon RI signaling pathway	KEGG PATHWAY	ssc04664	4	63	0.13864	0.793656	ENSSSCG00000010380|ENSSSCG00000007356|ENSSSCG00000003395|ENSSSCG00000014278	ssc:396610|ssc:100152497|ssc:100518131|ssc:397409|	396610|100152497|100518131|397409|	MAPK8, JNK, JNK1|PLCG1|PIK3CD|IL-5, IL5|	http://www.genome.jp/kegg-bin/show_pathway?ssc04664/ssc:100518131%09red/ssc:396610%09red/ssc:100152497%09red/ssc:397409%09red
Leishmaniasis	KEGG PATHWAY	ssc05140	4	63	0.13864	0.793656	ENSSSCG00000004110|ENSSSCG00000016058|ENSSSCG00000017755|ENSSSCG00000016057	ssc:100156182|ssc:396655|ssc:396859|ssc:396655|	100156182|396655|396859|396655|	TAB2|STAT1|NOS2, INOS, NOS2a|STAT1|	http://www.genome.jp/kegg-bin/show_pathway?ssc05140/ssc:100156182%09red/ssc:396655%09red/ssc:396859%09red
Aldosterone-regulated sodium reabsorption	KEGG PATHWAY	ssc04960	3	41	0.142363	0.793656	ENSSSCG00000003395|ENSSSCG00000025729|ENSSSCG00000007833	ssc:100518131|ssc:100512686|ssc:100522792|	100518131|100512686|100522792|	PIK3CD|IRS1| |	http://www.genome.jp/kegg-bin/show_pathway?ssc04960/ssc:100518131%09red/ssc:100522792%09red/ssc:100512686%09red
Proteoglycans in cancer	KEGG PATHWAY	ssc05205	9	192	0.146654	0.793656	ENSSSCG00000000183|ENSSSCG00000000182|ENSSSCG00000003395|ENSSSCG00000025095|ENSSSCG00000015815|ENSSSCG00000026816|ENSSSCG00000007356|ENSSSCG00000007833|ENSSSCG00000005209	ssc:100525462|ssc:100126276|ssc:100518131|ssc:397190|ssc:100153248|ssc:100620540|ssc:100152497|ssc:100522792|ssc:100038023|	100525462|100126276|100518131|397190|100153248|100620540|100152497|100522792|100038023|	WNT1|WNT10B|PIK3CD|PPP1R12A, MYPT1|FGFR1| |PLCG1| |RPS6|	http://www.genome.jp/kegg-bin/show_pathway?ssc05205/ssc:100518131%09red/ssc:100525462%09red/ssc:100522792%09red/ssc:100038023%09red/ssc:397190%09red/ssc:100620540%09red/ssc:100153248%09red/ssc:100152497%09red/ssc:100126276%09red
Gap junction	KEGG PATHWAY	ssc04540	5	90	0.153246	0.805636	ENSSSCG00000008730|ENSSSCG00000027952|ENSSSCG00000005285|ENSSSCG00000007833|ENSSSCG00000000193	ssc:100144487|ssc:100155970|ssc:654405|ssc:100522792|ssc:100135051|	100144487|100155970|654405|100522792|100135051|	DRD1|ADCY5|GNAQ| | |	http://www.genome.jp/kegg-bin/show_pathway?ssc04540/ssc:654405%09red/ssc:100522792%09red/ssc:100155970%09red/ssc:100135051%09red/ssc:100144487%09red
AMPK signaling pathway	KEGG PATHWAY	ssc04152	6	118	0.165012	0.821617	ENSSSCG00000003395|ENSSSCG00000003837|ENSSSCG00000000185|ENSSSCG00000014298|ENSSSCG00000025729|ENSSSCG00000009840	ssc:100518131|ssc:397504|ssc:414426|ssc:397656|ssc:100512686|ssc:100156537|	100518131|397504|414426|397656|100512686|100156537|	PIK3CD|PRKAA2, AMPKA2|PRKAG1|PPP2CA|IRS1|PRKAB1|	http://www.genome.jp/kegg-bin/show_pathway?ssc04152/ssc:100518131%09red/ssc:100156537%09red/ssc:397504%09red/ssc:100512686%09red/ssc:397656%09red/ssc:414426%09red
Sphingolipid metabolism	KEGG PATHWAY	ssc00600	3	45	0.171017	0.821617	ENSSSCG00000002512|ENSSSCG00000028558|ENSSSCG00000003839	ssc:100739329|ssc:100626032|ssc:100512419|	100739329|100626032|100512419|	|SGPP1|PPAP2B|	http://www.genome.jp/kegg-bin/show_pathway?ssc00600/ssc:100626032%09red/ssc:100512419%09red/ssc:100739329%09red
Dopaminergic synapse	KEGG PATHWAY	ssc04728	6	120	0.173644	0.821617	ENSSSCG00000010380|ENSSSCG00000005285|ENSSSCG00000014298|ENSSSCG00000027952|ENSSSCG00000008730|ENSSSCG00000007833	ssc:396610|ssc:654405|ssc:397656|ssc:100155970|ssc:100144487|ssc:100522792|	396610|654405|397656|100155970|100144487|100522792|	MAPK8, JNK, JNK1|GNAQ|PPP2CA|ADCY5|DRD1| |	http://www.genome.jp/kegg-bin/show_pathway?ssc04728/ssc:100522792%09red/ssc:396610%09red/ssc:397656%09red/ssc:100155970%09red/ssc:100144487%09red/ssc:654405%09red
Cocaine addiction	KEGG PATHWAY	ssc05030	3	46	0.178423	0.821617	ENSSSCG00000008730|ENSSSCG00000027952|ENSSSCG00000017730	ssc:100144487|ssc:100155970|ssc:100113467|	100144487|100155970|100113467|	DRD1|ADCY5|CDK5R1|	http://www.genome.jp/kegg-bin/show_pathway?ssc05030/ssc:100113467%09red/ssc:100155970%09red/ssc:100144487%09red
Hedgehog signaling pathway	KEGG PATHWAY	ssc04340	3	47	0.185915	0.821617	ENSSSCG00000000183|ENSSSCG00000000182|ENSSSCG00000000188	ssc:100525462|ssc:100126276|ssc:100505406|	100525462|100126276|100505406|	WNT1|WNT10B|DHH|	http://www.genome.jp/kegg-bin/show_pathway?ssc04340/ssc:100525462%09red/ssc:100126276%09red/ssc:100505406%09red
Parkinson's disease	KEGG PATHWAY	ssc05012	7	151	0.192173	0.821617	ENSSSCG00000027952|ENSSSCG00000013229|ENSSSCG00000003334|ENSSSCG00000011393|ENSSSCG00000004032|ENSSSCG00000008730|ENSSSCG00000022586	ssc:100155970|ssc:100510948|ssc:100523610|ssc:100512631|ssc:733673|ssc:100144487|ssc:100621056|	100155970|100510948|100523610|100512631|733673|100144487|100621056|	ADCY5|NDUFS3|UBE2J2|UBA7|PARK2, pdr-1|DRD1| |	http://www.genome.jp/kegg-bin/show_pathway?ssc05012/ssc:733673%09red/ssc:100621056%09red/ssc:100523610%09red/ssc:100510948%09red/ssc:100155970%09red/ssc:100144487%09red/ssc:100512631%09red
Rap1 signaling pathway	KEGG PATHWAY	ssc04015	9	208	0.199595	0.821617	ENSSSCG00000003395|ENSSSCG00000027952|ENSSSCG00000005285|ENSSSCG00000029741|ENSSSCG00000026682|ENSSSCG00000008495|ENSSSCG00000007356|ENSSSCG00000015815|ENSSSCG00000007833	ssc:100518131|ssc:100155970|ssc:654405|ssc:100622254|ssc:100520112|ssc:100523181|ssc:100152497|ssc:100153248|ssc:100522792|	100518131|100155970|654405|100622254|100520112|100523181|100152497|100153248|100522792|	PIK3CD|ADCY5|GNAQ|RALA|FYB|PRKD3|PLCG1|FGFR1| |	http://www.genome.jp/kegg-bin/show_pathway?ssc04015/ssc:100518131%09red/ssc:100522792%09red/ssc:100153248%09red/ssc:100523181%09red/ssc:100155970%09red/ssc:100622254%09red/ssc:654405%09red/ssc:100152497%09red/ssc:100520112%09red
Glycosphingolipid biosynthesis - lacto and neolacto series	KEGG PATHWAY	ssc00601	2	26	0.202129	0.821617	ENSSSCG00000029461|ENSSSCG00000026793	ssc:396619|ssc:100736821|	396619|100736821|	ST3GAL3, ST3GAL-III|B4GALT2|	http://www.genome.jp/kegg-bin/show_pathway?ssc00601/ssc:396619%09red/ssc:100736821%09red
Toll-like receptor signaling pathway	KEGG PATHWAY	ssc04620	5	101	0.208543	0.821617	ENSSSCG00000004110|ENSSSCG00000010380|ENSSSCG00000003395|ENSSSCG00000016058|ENSSSCG00000016057	ssc:100156182|ssc:396610|ssc:100518131|ssc:396655|ssc:396655|	100156182|396610|100518131|396655|396655|	TAB2|MAPK8, JNK, JNK1|PIK3CD|STAT1|STAT1|	http://www.genome.jp/kegg-bin/show_pathway?ssc04620/ssc:100518131%09red/ssc:396655%09red/ssc:100156182%09red/ssc:396610%09red
NOD-like receptor signaling pathway	KEGG PATHWAY	ssc04621	3	50	0.208853	0.821617	ENSSSCG00000001867|ENSSSCG00000004110|ENSSSCG00000010380	ssc:100152628|ssc:100156182|ssc:396610|	100152628|100156182|396610|	PSTPIP1|TAB2|MAPK8, JNK, JNK1|	http://www.genome.jp/kegg-bin/show_pathway?ssc04621/ssc:100156182%09red/ssc:396610%09red/ssc:100152628%09red
Phototransduction	KEGG PATHWAY	ssc04744	2	27	0.213099	0.821617	ENSSSCG00000028770|ENSSSCG00000014438	ssc:100516153|ssc:100515715|	100516153|100515715|	RCVRN|PDE6A|	http://www.genome.jp/kegg-bin/show_pathway?ssc04744/ssc:100516153%09red/ssc:100515715%09red
Homologous recombination	KEGG PATHWAY	ssc03440	2	28	0.224123	0.821617	ENSSSCG00000006127|ENSSSCG00000014280	ssc:100153233|ssc:100522666|	100153233|100522666|	NBN|RAD50|	http://www.genome.jp/kegg-bin/show_pathway?ssc03440/ssc:100153233%09red/ssc:100522666%09red
Non-small cell lung cancer	KEGG PATHWAY	ssc05223	3	52	0.224476	0.821617	ENSSSCG00000007356|ENSSSCG00000003395|ENSSSCG00000007833	ssc:100152497|ssc:100518131|ssc:100522792|	100152497|100518131|100522792|	PLCG1|PIK3CD| |	http://www.genome.jp/kegg-bin/show_pathway?ssc05223/ssc:100518131%09red/ssc:100522792%09red/ssc:100152497%09red
Basal cell carcinoma	KEGG PATHWAY	ssc05217	3	52	0.224476	0.821617	ENSSSCG00000000183|ENSSSCG00000000182|ENSSSCG00000030680	ssc:100525462|ssc:100126276|ssc:100170126|	100525462|100126276|100170126|	WNT1|WNT10B|LEF1|	http://www.genome.jp/kegg-bin/show_pathway?ssc05217/ssc:100525462%09red/ssc:100126276%09red/ssc:100170126%09red
Platelet activation	KEGG PATHWAY	ssc04611	6	132	0.228959	0.821617	ENSSSCG00000017872|ENSSSCG00000003395|ENSSSCG00000025095|ENSSSCG00000005285|ENSSSCG00000004727|ENSSSCG00000027952	ssc:100739675|ssc:100518131|ssc:397190|ssc:654405|ssc:100512755|ssc:100155970|	100739675|100518131|397190|654405|100512755|100155970|	|PIK3CD|PPP1R12A, MYPT1|GNAQ|SNAP23|ADCY5|	http://www.genome.jp/kegg-bin/show_pathway?ssc04611/ssc:100518131%09red/ssc:397190%09red/ssc:100512755%09red/ssc:100739675%09red/ssc:100155970%09red/ssc:654405%09red
Non-alcoholic fatty liver disease (NAFLD)	KEGG PATHWAY	ssc04932	7	160	0.230369	0.821617	ENSSSCG00000010380|ENSSSCG00000003395|ENSSSCG00000003837|ENSSSCG00000000185|ENSSSCG00000013229|ENSSSCG00000025729|ENSSSCG00000009840	ssc:396610|ssc:100518131|ssc:397504|ssc:414426|ssc:100510948|ssc:100512686|ssc:100156537|	396610|100518131|397504|414426|100510948|100512686|100156537|	MAPK8, JNK, JNK1|PIK3CD|PRKAA2, AMPKA2|PRKAG1|NDUFS3|IRS1|PRKAB1|	http://www.genome.jp/kegg-bin/show_pathway?ssc04932/ssc:100518131%09red/ssc:100156537%09red/ssc:396610%09red/ssc:397504%09red/ssc:100510948%09red/ssc:100512686%09red/ssc:414426%09red
Taurine and hypotaurine metabolism	KEGG PATHWAY	ssc00430	1	8	0.238045	0.821617	ENSSSCG00000014219	ssc:100312964|	100312964|	CDO1|	http://www.genome.jp/kegg-bin/show_pathway?ssc00430/ssc:100312964%09red
Protein processing in endoplasmic reticulum	KEGG PATHWAY	ssc04141	7	162	0.239189	0.821617	ENSSSCG00000010380|ENSSSCG00000030567|ENSSSCG00000003334|ENSSSCG00000025181|ENSSSCG00000004032|ENSSSCG00000008414|ENSSSCG00000024692	ssc:396610|ssc:100625983|ssc:100523610|ssc:100523731|ssc:733673|ssc:100517335|ssc:100154945|	396610|100625983|100523610|100523731|733673|100517335|100154945|	MAPK8, JNK, JNK1|SSR3|UBE2J2| |PARK2, pdr-1|ERLEC1|RRBP1|	http://www.genome.jp/kegg-bin/show_pathway?ssc04141/ssc:733673%09red/ssc:100154945%09red/ssc:100517335%09red/ssc:396610%09red/ssc:100523610%09red/ssc:100523731%09red/ssc:100625983%09red
Chagas disease (American trypanosomiasis)	KEGG PATHWAY	ssc05142	5	108	0.246648	0.821617	ENSSSCG00000010380|ENSSSCG00000005285|ENSSSCG00000017755|ENSSSCG00000003395|ENSSSCG00000014298	ssc:396610|ssc:654405|ssc:396859|ssc:100518131|ssc:397656|	396610|654405|396859|100518131|397656|	MAPK8, JNK, JNK1|GNAQ|NOS2, INOS, NOS2a|PIK3CD|PPP2CA|	http://www.genome.jp/kegg-bin/show_pathway?ssc05142/ssc:100518131%09red/ssc:654405%09red/ssc:396859%09red/ssc:396610%09red/ssc:397656%09red
Hippo signaling pathway	KEGG PATHWAY	ssc04390	6	138	0.258502	0.821617	ENSSSCG00000000183|ENSSSCG00000000182|ENSSSCG00000014298|ENSSSCG00000006062|ENSSSCG00000006074|ENSSSCG00000030680	ssc:100525462|ssc:100126276|ssc:397656|ssc:780440|ssc:100524741|ssc:100170126|	100525462|100126276|397656|780440|100524741|100170126|	WNT1|WNT10B|PPP2CA|YWHAZ|STK3|LEF1|	http://www.genome.jp/kegg-bin/show_pathway?ssc04390/ssc:100525462%09red/ssc:100524741%09red/ssc:100170126%09red/ssc:780440%09red/ssc:397656%09red/ssc:100126276%09red
Inositol phosphate metabolism	KEGG PATHWAY	ssc00562	3	57	0.264399	0.821617	ENSSSCG00000007356|ENSSSCG00000003395|ENSSSCG00000016192	ssc:100152497|ssc:100518131|ssc:397119|	100152497|100518131|397119|	PLCG1|PIK3CD|PLCD4|	http://www.genome.jp/kegg-bin/show_pathway?ssc00562/ssc:100518131%09red/ssc:100152497%09red/ssc:397119%09red
VEGF signaling pathway	KEGG PATHWAY	ssc04370	3	58	0.272493	0.821617	ENSSSCG00000007356|ENSSSCG00000003395|ENSSSCG00000007833	ssc:100152497|ssc:100518131|ssc:100522792|	100152497|100518131|100522792|	PLCG1|PIK3CD| |	http://www.genome.jp/kegg-bin/show_pathway?ssc04370/ssc:100518131%09red/ssc:100522792%09red/ssc:100152497%09red
Progesterone-mediated oocyte maturation	KEGG PATHWAY	ssc04914	4	85	0.273089	0.821617	ENSSSCG00000010380|ENSSSCG00000027952|ENSSSCG00000003395|ENSSSCG00000007151	ssc:396610|ssc:100155970|ssc:100518131|ssc:100329127|	396610|100155970|100518131|100329127|	MAPK8, JNK, JNK1|ADCY5|PIK3CD|CDC25B|	http://www.genome.jp/kegg-bin/show_pathway?ssc04914/ssc:100518131%09red/ssc:396610%09red/ssc:100155970%09red/ssc:100329127%09red
ErbB signaling pathway	KEGG PATHWAY	ssc04012	4	85	0.273089	0.821617	ENSSSCG00000010380|ENSSSCG00000007356|ENSSSCG00000003395|ENSSSCG00000007833	ssc:396610|ssc:100152497|ssc:100518131|ssc:100522792|	396610|100152497|100518131|100522792|	MAPK8, JNK, JNK1|PLCG1|PIK3CD| |	http://www.genome.jp/kegg-bin/show_pathway?ssc04012/ssc:100518131%09red/ssc:396610%09red/ssc:100522792%09red/ssc:100152497%09red
Insulin secretion	KEGG PATHWAY	ssc04911	4	86	0.279724	0.821617	ENSSSCG00000006045|ENSSSCG00000005285|ENSSSCG00000007833|ENSSSCG00000027952	ssc:100624568|ssc:654405|ssc:100522792|ssc:100155970|	100624568|654405|100522792|100155970|	|GNAQ| |ADCY5|	http://www.genome.jp/kegg-bin/show_pathway?ssc04911/ssc:654405%09red/ssc:100522792%09red/ssc:100624568%09red/ssc:100155970%09red
Chemokine signaling pathway	KEGG PATHWAY	ssc04062	7	173	0.289438	0.821617	ENSSSCG00000003395|ENSSSCG00000024344|ENSSSCG00000024311|ENSSSCG00000027952|ENSSSCG00000016058|ENSSSCG00000016057|ENSSSCG00000016656	ssc:100518131|ssc:414371|ssc:414372|ssc:100155970|ssc:396655|ssc:396655|ssc:100522109|	100518131|414371|414372|100155970|396655|396655|100522109|	PIK3CD|CCR5|CCR2|ADCY5|STAT1|STAT1|ELMO1|	http://www.genome.jp/kegg-bin/show_pathway?ssc04062/ssc:100522109%09red/ssc:100518131%09red/ssc:414371%09red/ssc:414372%09red/ssc:100155970%09red/ssc:396655%09red
African trypanosomiasis	KEGG PATHWAY	ssc05143	2	34	0.290733	0.821617	ENSSSCG00000005285|ENSSSCG00000007833	ssc:654405|ssc:100522792|	654405|100522792|	GNAQ| |	http://www.genome.jp/kegg-bin/show_pathway?ssc05143/ssc:654405%09red/ssc:100522792%09red
Glioma	KEGG PATHWAY	ssc05214	3	61	0.296912	0.821617	ENSSSCG00000007356|ENSSSCG00000003395|ENSSSCG00000007833	ssc:100152497|ssc:100518131|ssc:100522792|	100152497|100518131|100522792|	PLCG1|PIK3CD| |	http://www.genome.jp/kegg-bin/show_pathway?ssc05214/ssc:100518131%09red/ssc:100522792%09red/ssc:100152497%09red
Vascular smooth muscle contraction	KEGG PATHWAY	ssc04270	5	117	0.297934	0.821617	ENSSSCG00000025095|ENSSSCG00000005285|ENSSSCG00000007833|ENSSSCG00000008444|ENSSSCG00000027952	ssc:397190|ssc:654405|ssc:100522792|ssc:100524932|ssc:100155970|	397190|654405|100522792|100524932|100155970|	PPP1R12A, MYPT1|GNAQ| |PRKCE|ADCY5|	http://www.genome.jp/kegg-bin/show_pathway?ssc04270/ssc:100524932%09red/ssc:654405%09red/ssc:100522792%09red/ssc:397190%09red/ssc:100155970%09red
Neurotrophin signaling pathway	KEGG PATHWAY	ssc04722	5	118	0.303747	0.821617	ENSSSCG00000010380|ENSSSCG00000007356|ENSSSCG00000003395|ENSSSCG00000025729|ENSSSCG00000026816	ssc:396610|ssc:100152497|ssc:100518131|ssc:100512686|ssc:100620540|	396610|100152497|100518131|100512686|100620540|	MAPK8, JNK, JNK1|PLCG1|PIK3CD|IRS1| |	http://www.genome.jp/kegg-bin/show_pathway?ssc04722/ssc:100518131%09red/ssc:396610%09red/ssc:100620540%09red/ssc:100152497%09red/ssc:100512686%09red
Leukocyte transendothelial migration	KEGG PATHWAY	ssc04670	5	119	0.309576	0.821617	ENSSSCG00000007356|ENSSSCG00000003395|ENSSSCG00000026816|ENSSSCG00000007833|ENSSSCG00000023028	ssc:100152497|ssc:100518131|ssc:100620540|ssc:100522792|ssc:100621244|	100152497|100518131|100620540|100522792|100621244|	PLCG1|PIK3CD| | |JAM2|	http://www.genome.jp/kegg-bin/show_pathway?ssc04670/ssc:100518131%09red/ssc:100522792%09red/ssc:100152497%09red/ssc:100620540%09red/ssc:100621244%09red
Amphetamine addiction	KEGG PATHWAY	ssc05031	3	65	0.329637	0.821617	ENSSSCG00000008730|ENSSSCG00000027952|ENSSSCG00000007833	ssc:100144487|ssc:100155970|ssc:100522792|	100144487|100155970|100522792|	DRD1|ADCY5| |	http://www.genome.jp/kegg-bin/show_pathway?ssc05031/ssc:100522792%09red/ssc:100155970%09red/ssc:100144487%09red
Calcium signaling pathway	KEGG PATHWAY	ssc04020	7	182	0.332189	0.821617	ENSSSCG00000017872|ENSSSCG00000016192|ENSSSCG00000005285|ENSSSCG00000017755|ENSSSCG00000007356|ENSSSCG00000008730|ENSSSCG00000007833	ssc:100739675|ssc:397119|ssc:654405|ssc:396859|ssc:100152497|ssc:100144487|ssc:100522792|	100739675|397119|654405|396859|100152497|100144487|100522792|	|PLCD4|GNAQ|NOS2, INOS, NOS2a|PLCG1|DRD1| |	http://www.genome.jp/kegg-bin/show_pathway?ssc04020/ssc:100522792%09red/ssc:396859%09red/ssc:100739675%09red/ssc:100144487%09red/ssc:654405%09red/ssc:100152497%09red/ssc:397119%09red
Herpes simplex infection	KEGG PATHWAY	ssc05168	7	182	0.332189	0.821617	ENSSSCG00000010380|ENSSSCG00000030731|ENSSSCG00000026816|ENSSSCG00000004110|ENSSSCG00000016058|ENSSSCG00000025181|ENSSSCG00000016057	ssc:396610|ssc:100135031|ssc:100620540|ssc:100156182|ssc:396655|ssc:100523731|ssc:396655|	396610|100135031|100620540|100156182|396655|100523731|396655|	MAPK8, JNK, JNK1|SLA-2, SLA-B| |TAB2|STAT1| |STAT1|	http://www.genome.jp/kegg-bin/show_pathway?ssc05168/ssc:100620540%09red/ssc:100156182%09red/ssc:100135031%09red/ssc:100523731%09red/ssc:396655%09red/ssc:396610%09red
Regulation of autophagy	KEGG PATHWAY	ssc04140	2	38	0.334841	0.821617	ENSSSCG00000003837|ENSSSCG00000014220	ssc:397504|ssc:100462745|	397504|100462745|	PRKAA2, AMPKA2|ATG12|	http://www.genome.jp/kegg-bin/show_pathway?ssc04140/ssc:100462745%09red/ssc:397504%09red
Allograft rejection	KEGG PATHWAY	ssc05330	2	38	0.334841	0.821617	ENSSSCG00000014278|ENSSSCG00000030731	ssc:397409|ssc:100135031|	397409|100135031|	IL-5, IL5|SLA-2, SLA-B|	http://www.genome.jp/kegg-bin/show_pathway?ssc05330/ssc:100135031%09red/ssc:397409%09red
Purine metabolism	KEGG PATHWAY	ssc00230	7	183	0.337001	0.821617	ENSSSCG00000003808|ENSSSCG00000025233|ENSSSCG00000022880|ENSSSCG00000029007|ENSSSCG00000027952|ENSSSCG00000008399|ENSSSCG00000014438	ssc:733667|ssc:100642182|ssc:100642182|ssc:100525046|ssc:100155970|ssc:100642182|ssc:100515715|	733667|100642182|100642182|100525046|100155970|100642182|100515715|	AK3L1, AK3|PNPT1|PNPT1| |ADCY5|PNPT1|PDE6A|	http://www.genome.jp/kegg-bin/show_pathway?ssc00230/ssc:100642182%09red/ssc:100525046%09red/ssc:100515715%09red/ssc:100155970%09red/ssc:733667%09red
Retrograde endocannabinoid signaling	KEGG PATHWAY	ssc04723	4	95	0.340279	0.821617	ENSSSCG00000010380|ENSSSCG00000027952|ENSSSCG00000005285|ENSSSCG00000007833	ssc:396610|ssc:100155970|ssc:654405|ssc:100522792|	396610|100155970|654405|100522792|	MAPK8, JNK, JNK1|ADCY5|GNAQ| |	http://www.genome.jp/kegg-bin/show_pathway?ssc04723/ssc:396610%09red/ssc:654405%09red/ssc:100522792%09red/ssc:100155970%09red
Non-homologous end-joining	KEGG PATHWAY	ssc03450	1	13	0.344889	0.821617	ENSSSCG00000014280	ssc:100522666|	100522666|	RAD50|	http://www.genome.jp/kegg-bin/show_pathway?ssc03450/ssc:100522666%09red
RIG-I-like receptor signaling pathway	KEGG PATHWAY	ssc04622	3	68	0.354168	0.821617	ENSSSCG00000010380|ENSSSCG00000029475|ENSSSCG00000014220	ssc:396610|ssc:100622285|ssc:100462745|	396610|100622285|100462745|	MAPK8, JNK, JNK1| |ATG12|	http://www.genome.jp/kegg-bin/show_pathway?ssc04622/ssc:396610%09red/ssc:100462745%09red/ssc:100622285%09red
Colorectal cancer	KEGG PATHWAY	ssc05210	3	68	0.354168	0.821617	ENSSSCG00000010380|ENSSSCG00000003395|ENSSSCG00000030680	ssc:396610|ssc:100518131|ssc:100170126|	396610|100518131|100170126|	MAPK8, JNK, JNK1|PIK3CD|LEF1|	http://www.genome.jp/kegg-bin/show_pathway?ssc05210/ssc:100518131%09red/ssc:396610%09red/ssc:100170126%09red
Wnt signaling pathway	KEGG PATHWAY	ssc04310	5	128	0.362553	0.821617	ENSSSCG00000000183|ENSSSCG00000000182|ENSSSCG00000010380|ENSSSCG00000007833|ENSSSCG00000030680	ssc:100525462|ssc:100126276|ssc:396610|ssc:100522792|ssc:100170126|	100525462|100126276|396610|100522792|100170126|	WNT1|WNT10B|MAPK8, JNK, JNK1| |LEF1|	http://www.genome.jp/kegg-bin/show_pathway?ssc04310/ssc:396610%09red/ssc:100525462%09red/ssc:100522792%09red/ssc:100126276%09red/ssc:100170126%09red
Epstein-Barr virus infection	KEGG PATHWAY	ssc05169	7	189	0.366042	0.821617	ENSSSCG00000010380|ENSSSCG00000006062|ENSSSCG00000003395|ENSSSCG00000030731|ENSSSCG00000004110|ENSSSCG00000007356|ENSSSCG00000025181	ssc:396610|ssc:780440|ssc:100518131|ssc:100135031|ssc:100156182|ssc:100152497|ssc:100523731|	396610|780440|100518131|100135031|100156182|100152497|100523731|	MAPK8, JNK, JNK1|YWHAZ|PIK3CD|SLA-2, SLA-B|TAB2|PLCG1| |	http://www.genome.jp/kegg-bin/show_pathway?ssc05169/ssc:100518131%09red/ssc:100523731%09red/ssc:100156182%09red/ssc:780440%09red/ssc:100135031%09red/ssc:396610%09red/ssc:100152497%09red
Ether lipid metabolism	KEGG PATHWAY	ssc00565	2	41	0.367393	0.821617	ENSSSCG00000003839|ENSSSCG00000024027	ssc:100512419|ssc:100523683|	100512419|100523683|	PPAP2B|PAFAH1B2|	http://www.genome.jp/kegg-bin/show_pathway?ssc00565/ssc:100523683%09red/ssc:100512419%09red
Endocrine and other factor-regulated calcium reabsorption	KEGG PATHWAY	ssc04961	2	42	0.378109	0.821617	ENSSSCG00000005285|ENSSSCG00000007833	ssc:654405|ssc:100522792|	654405|100522792|	GNAQ| |	http://www.genome.jp/kegg-bin/show_pathway?ssc04961/ssc:654405%09red/ssc:100522792%09red
Carbohydrate digestion and absorption	KEGG PATHWAY	ssc04973	2	42	0.378109	0.821617	ENSSSCG00000003395|ENSSSCG00000021417	ssc:100518131|ssc:100522672|	100518131|100522672|	PIK3CD| |	http://www.genome.jp/kegg-bin/show_pathway?ssc04973/ssc:100518131%09red/ssc:100522672%09red
Adherens junction	KEGG PATHWAY	ssc04520	3	71	0.378582	0.821617	ENSSSCG00000015815|ENSSSCG00000003577|ENSSSCG00000030680	ssc:100153248|ssc:100512789|ssc:100170126|	100153248|100512789|100170126|	FGFR1|WASF2|LEF1|	http://www.genome.jp/kegg-bin/show_pathway?ssc04520/ssc:100512789%09red/ssc:100153248%09red/ssc:100170126%09red
Pyrimidine metabolism	KEGG PATHWAY	ssc00240	4	101	0.380943	0.821617	ENSSSCG00000008399|ENSSSCG00000000843|ENSSSCG00000022880|ENSSSCG00000025233	ssc:100642182|ssc:396681|ssc:100642182|ssc:100642182|	100642182|396681|100642182|100642182|	PNPT1|TXNRD1, TRXR1|PNPT1|PNPT1|	http://www.genome.jp/kegg-bin/show_pathway?ssc00240/ssc:100642182%09red/ssc:396681%09red
Ras signaling pathway	KEGG PATHWAY	ssc04014	8	223	0.381871	0.821617	ENSSSCG00000010380|ENSSSCG00000003395|ENSSSCG00000015815|ENSSSCG00000029741|ENSSSCG00000017753|ENSSSCG00000007356|ENSSSCG00000026816|ENSSSCG00000007833	ssc:396610|ssc:100518131|ssc:100153248|ssc:100622254|ssc:100511282|ssc:100152497|ssc:100620540|ssc:100522792|	396610|100518131|100153248|100622254|100511282|100152497|100620540|100522792|	MAPK8, JNK, JNK1|PIK3CD|FGFR1|RALA|KSR1|PLCG1| | |	http://www.genome.jp/kegg-bin/show_pathway?ssc04014/ssc:100518131%09red/ssc:100522792%09red/ssc:396610%09red/ssc:100620540%09red/ssc:100153248%09red/ssc:100622254%09red/ssc:100511282%09red/ssc:100152497%09red
Thyroid hormone synthesis	KEGG PATHWAY	ssc04918	3	72	0.38668	0.821617	ENSSSCG00000027952|ENSSSCG00000005285|ENSSSCG00000007833	ssc:100155970|ssc:654405|ssc:100522792|	100155970|654405|100522792|	ADCY5|GNAQ| |	http://www.genome.jp/kegg-bin/show_pathway?ssc04918/ssc:654405%09red/ssc:100522792%09red/ssc:100155970%09red
Measles	KEGG PATHWAY	ssc05162	5	133	0.392131	0.821617	ENSSSCG00000004110|ENSSSCG00000003395|ENSSSCG00000016058|ENSSSCG00000025181|ENSSSCG00000016057	ssc:100156182|ssc:100518131|ssc:396655|ssc:100523731|ssc:396655|	100156182|100518131|396655|100523731|396655|	TAB2|PIK3CD|STAT1| |STAT1|	http://www.genome.jp/kegg-bin/show_pathway?ssc05162/ssc:100518131%09red/ssc:396655%09red/ssc:100523731%09red/ssc:100156182%09red
Bacterial invasion of epithelial cells	KEGG PATHWAY	ssc05100	3	73	0.394752	0.821617	ENSSSCG00000003395|ENSSSCG00000003577|ENSSSCG00000016656	ssc:100518131|ssc:100512789|ssc:100522109|	100518131|100512789|100522109|	PIK3CD|WASF2|ELMO1|	http://www.genome.jp/kegg-bin/show_pathway?ssc05100/ssc:100522109%09red/ssc:100518131%09red/ssc:100512789%09red
Pertussis	KEGG PATHWAY	ssc05133	3	73	0.394752	0.821617	ENSSSCG00000010380|ENSSSCG00000017755|ENSSSCG00000014277	ssc:396610|ssc:396859|ssc:396611|	396610|396859|396611|	MAPK8, JNK, JNK1|NOS2, INOS, NOS2a|IRF1, IRF-1|	http://www.genome.jp/kegg-bin/show_pathway?ssc05133/ssc:396610%09red/ssc:396611%09red/ssc:396859%09red
Selenocompound metabolism	KEGG PATHWAY	ssc00450	1	16	0.401672	0.821617	ENSSSCG00000000843	ssc:396681|	396681|	TXNRD1, TRXR1|	http://www.genome.jp/kegg-bin/show_pathway?ssc00450/ssc:396681%09red
Gastric acid secretion	KEGG PATHWAY	ssc04971	3	74	0.402796	0.821617	ENSSSCG00000027952|ENSSSCG00000005285|ENSSSCG00000007833	ssc:100155970|ssc:654405|ssc:100522792|	100155970|654405|100522792|	ADCY5|GNAQ| |	http://www.genome.jp/kegg-bin/show_pathway?ssc04971/ssc:654405%09red/ssc:100522792%09red/ssc:100155970%09red
cGMP-PKG signaling pathway	KEGG PATHWAY	ssc04022	6	167	0.410252	0.821617	ENSSSCG00000003395|ENSSSCG00000027952|ENSSSCG00000005285|ENSSSCG00000025095|ENSSSCG00000025729|ENSSSCG00000008444	ssc:100518131|ssc:100155970|ssc:654405|ssc:397190|ssc:100512686|ssc:100524932|	100518131|100155970|654405|397190|100512686|100524932|	PIK3CD|ADCY5|GNAQ|PPP1R12A, MYPT1|IRS1|PRKCE|	http://www.genome.jp/kegg-bin/show_pathway?ssc04022/ssc:100518131%09red/ssc:100524932%09red/ssc:397190%09red/ssc:100512686%09red/ssc:100155970%09red/ssc:654405%09red
Salivary secretion	KEGG PATHWAY	ssc04970	3	75	0.410808	0.821617	ENSSSCG00000027952|ENSSSCG00000005285|ENSSSCG00000007833	ssc:100155970|ssc:654405|ssc:100522792|	100155970|654405|100522792|	ADCY5|GNAQ| |	http://www.genome.jp/kegg-bin/show_pathway?ssc04970/ssc:654405%09red/ssc:100522792%09red/ssc:100155970%09red
Influenza A	KEGG PATHWAY	ssc05164	6	168	0.415557	0.822178	ENSSSCG00000010380|ENSSSCG00000003395|ENSSSCG00000025181|ENSSSCG00000016058|ENSSSCG00000029475|ENSSSCG00000016057	ssc:396610|ssc:100518131|ssc:100523731|ssc:396655|ssc:100622285|ssc:396655|	396610|100518131|100523731|396655|100622285|396655|	MAPK8, JNK, JNK1|PIK3CD| |STAT1| |STAT1|	http://www.genome.jp/kegg-bin/show_pathway?ssc05164/ssc:100518131%09red/ssc:396655%09red/ssc:100622285%09red/ssc:100523731%09red/ssc:396610%09red
Natural killer cell mediated cytotoxicity	KEGG PATHWAY	ssc04650	4	108	0.427999	0.833087	ENSSSCG00000007356|ENSSSCG00000003395|ENSSSCG00000007833|ENSSSCG00000026816	ssc:100152497|ssc:100518131|ssc:100522792|ssc:100620540|	100152497|100518131|100522792|100620540|	PLCG1|PIK3CD| | |	http://www.genome.jp/kegg-bin/show_pathway?ssc04650/ssc:100518131%09red/ssc:100522792%09red/ssc:100152497%09red/ssc:100620540%09red
Hypertrophic cardiomyopathy (HCM)	KEGG PATHWAY	ssc05410	3	78	0.434636	0.833087	ENSSSCG00000009840|ENSSSCG00000000185|ENSSSCG00000003837	ssc:100156537|ssc:414426|ssc:397504|	100156537|414426|397504|	PRKAB1|PRKAG1|PRKAA2, AMPKA2|	http://www.genome.jp/kegg-bin/show_pathway?ssc05410/ssc:414426%09red/ssc:397504%09red/ssc:100156537%09red
TNF signaling pathway	KEGG PATHWAY	ssc04668	4	109	0.434654	0.833087	ENSSSCG00000004110|ENSSSCG00000010380|ENSSSCG00000003395|ENSSSCG00000001050	ssc:100156182|ssc:396610|ssc:100518131|ssc:396915|	100156182|396610|100518131|396915|	TAB2|MAPK8, JNK, JNK1|PIK3CD|EDN1, EDN, ET-1, ET1, PPET1|	http://www.genome.jp/kegg-bin/show_pathway?ssc04668/ssc:100518131%09red/ssc:100156182%09red/ssc:396915%09red/ssc:396610%09red
N-Glycan biosynthesis	KEGG PATHWAY	ssc00510	2	49	0.45072	0.839919	ENSSSCG00000002283|ENSSSCG00000026793	ssc:396933|ssc:100736821|	396933|100736821|	FUT8|B4GALT2|	http://www.genome.jp/kegg-bin/show_pathway?ssc00510/ssc:100736821%09red/ssc:396933%09red
Endometrial cancer	KEGG PATHWAY	ssc05213	2	49	0.45072	0.839919	ENSSSCG00000003395|ENSSSCG00000030680	ssc:100518131|ssc:100170126|	100518131|100170126|	PIK3CD|LEF1|	http://www.genome.jp/kegg-bin/show_pathway?ssc05213/ssc:100518131%09red/ssc:100170126%09red
Salmonella infection	KEGG PATHWAY	ssc05132	3	81	0.458096	0.839919	ENSSSCG00000010380|ENSSSCG00000017755|ENSSSCG00000003577	ssc:396610|ssc:396859|ssc:100512789|	396610|396859|100512789|	MAPK8, JNK, JNK1|NOS2, INOS, NOS2a|WASF2|	http://www.genome.jp/kegg-bin/show_pathway?ssc05132/ssc:396610%09red/ssc:100512789%09red/ssc:396859%09red
Lysine degradation	KEGG PATHWAY	ssc00310	2	50	0.460704	0.839919	ENSSSCG00000000191|ENSSSCG00000015820	ssc:100513150|ssc:100520868|	100513150|100520868|	KMT2D|WHSC1L1|	http://www.genome.jp/kegg-bin/show_pathway?ssc00310/ssc:100520868%09red/ssc:100513150%09red
Cholinergic synapse	KEGG PATHWAY	ssc04725	4	113	0.461042	0.839919	ENSSSCG00000003395|ENSSSCG00000005285|ENSSSCG00000007833|ENSSSCG00000027952	ssc:100518131|ssc:654405|ssc:100522792|ssc:100155970|	100518131|654405|100522792|100155970|	PIK3CD|GNAQ| |ADCY5|	http://www.genome.jp/kegg-bin/show_pathway?ssc04725/ssc:100518131%09red/ssc:654405%09red/ssc:100522792%09red/ssc:100155970%09red
Fanconi anemia pathway	KEGG PATHWAY	ssc03460	2	51	0.47058	0.840648	ENSSSCG00000022149|ENSSSCG00000003403	ssc:100518832|ssc:100522376|	100518832|100522376|	RMI2|APITD1|	http://www.genome.jp/kegg-bin/show_pathway?ssc03460/ssc:100518832%09red/ssc:100522376%09red
Autoimmune thyroid disease	KEGG PATHWAY	ssc05320	2	51	0.47058	0.840648	ENSSSCG00000014278|ENSSSCG00000030731	ssc:397409|ssc:100135031|	397409|100135031|	IL-5, IL5|SLA-2, SLA-B|	http://www.genome.jp/kegg-bin/show_pathway?ssc05320/ssc:100135031%09red/ssc:397409%09red
Prostate cancer	KEGG PATHWAY	ssc05215	3	85	0.488709	0.85815	ENSSSCG00000003395|ENSSSCG00000015815|ENSSSCG00000030680	ssc:100518131|ssc:100153248|ssc:100170126|	100518131|100153248|100170126|	PIK3CD|FGFR1|LEF1|	http://www.genome.jp/kegg-bin/show_pathway?ssc05215/ssc:100518131%09red/ssc:100153248%09red/ssc:100170126%09red
GnRH signaling pathway	KEGG PATHWAY	ssc04912	3	86	0.496231	0.85815	ENSSSCG00000010380|ENSSSCG00000027952|ENSSSCG00000005285	ssc:396610|ssc:100155970|ssc:654405|	396610|100155970|654405|	MAPK8, JNK, JNK1|ADCY5|GNAQ|	http://www.genome.jp/kegg-bin/show_pathway?ssc04912/ssc:396610%09red/ssc:654405%09red/ssc:100155970%09red
Acute myeloid leukemia	KEGG PATHWAY	ssc05221	2	54	0.499545	0.85815	ENSSSCG00000003395|ENSSSCG00000030680	ssc:100518131|ssc:100170126|	100518131|100170126|	PIK3CD|LEF1|	http://www.genome.jp/kegg-bin/show_pathway?ssc05221/ssc:100518131%09red/ssc:100170126%09red
Glycerolipid metabolism	KEGG PATHWAY	ssc00561	2	54	0.499545	0.85815	ENSSSCG00000017615|ENSSSCG00000003839	ssc:100312967|ssc:100512419|	100312967|100512419|	DGKE|PPAP2B|	http://www.genome.jp/kegg-bin/show_pathway?ssc00561/ssc:100312967%09red/ssc:100512419%09red
Pancreatic secretion	KEGG PATHWAY	ssc04972	3	87	0.503696	0.85815	ENSSSCG00000027952|ENSSSCG00000005285|ENSSSCG00000007833	ssc:100155970|ssc:654405|ssc:100522792|	100155970|654405|100522792|	ADCY5|GNAQ| |	http://www.genome.jp/kegg-bin/show_pathway?ssc04972/ssc:654405%09red/ssc:100522792%09red/ssc:100155970%09red
Small cell lung cancer	KEGG PATHWAY	ssc05222	3	88	0.511105	0.862758	ENSSSCG00000003395|ENSSSCG00000017755|ENSSSCG00000009544	ssc:100518131|ssc:396859|ssc:100515336|	100518131|396859|100515336|	PIK3CD|NOS2, INOS, NOS2a|COL4A1|	http://www.genome.jp/kegg-bin/show_pathway?ssc05222/ssc:100518131%09red/ssc:100515336%09red/ssc:396859%09red
Pentose phosphate pathway	KEGG PATHWAY	ssc00030	1	23	0.515779	0.862758	ENSSSCG00000003402	ssc:397546|	397546|	PGD|	http://www.genome.jp/kegg-bin/show_pathway?ssc00030/ssc:397546%09red
Morphine addiction	KEGG PATHWAY	ssc05032	3	90	0.525744	0.863334	ENSSSCG00000008730|ENSSSCG00000027952|ENSSSCG00000007833	ssc:100144487|ssc:100155970|ssc:100522792|	100144487|100155970|100522792|	DRD1|ADCY5| |	http://www.genome.jp/kegg-bin/show_pathway?ssc05032/ssc:100522792%09red/ssc:100155970%09red/ssc:100144487%09red
NF-kappa B signaling pathway	KEGG PATHWAY	ssc04064	3	90	0.525744	0.863334	ENSSSCG00000004110|ENSSSCG00000007356|ENSSSCG00000029475	ssc:100156182|ssc:100152497|ssc:100622285|	100156182|100152497|100622285|	TAB2|PLCG1| |	http://www.genome.jp/kegg-bin/show_pathway?ssc04064/ssc:100156182%09red/ssc:100622285%09red/ssc:100152497%09red
Asthma	KEGG PATHWAY	ssc05310	1	24	0.5302	0.863334	ENSSSCG00000014278	ssc:397409|	397409|	IL-5, IL5|	http://www.genome.jp/kegg-bin/show_pathway?ssc05310/ssc:397409%09red
MicroRNAs in cancer	KEGG PATHWAY	ssc05206	7	228	0.551977	0.890911	ENSSSCG00000007151|ENSSSCG00000027855|ENSSSCG00000005101|ENSSSCG00000007356|ENSSSCG00000025729|ENSSSCG00000008444|ENSSSCG00000007833	ssc:100329127|ssc:100307052|ssc:100359361|ssc:100152497|ssc:100512686|ssc:100524932|ssc:100522792|	100329127|100307052|100359361|100152497|100512686|100524932|100522792|	CDC25B|SOCS1| |PLCG1|IRS1|PRKCE| |	http://www.genome.jp/kegg-bin/show_pathway?ssc05206/ssc:100522792%09red/ssc:100329127%09red/ssc:100524932%09red/ssc:100359361%09red/ssc:100307052%09red/ssc:100512686%09red/ssc:100152497%09red
Tight junction	KEGG PATHWAY	ssc04530	4	129	0.561436	0.898298	ENSSSCG00000007833|ENSSSCG00000014298|ENSSSCG00000008444|ENSSSCG00000023028	ssc:100522792|ssc:397656|ssc:100524932|ssc:100621244|	100522792|397656|100524932|100621244|	|PPP2CA|PRKCE|JAM2|	http://www.genome.jp/kegg-bin/show_pathway?ssc04530/ssc:100524932%09red/ssc:397656%09red/ssc:100522792%09red/ssc:100621244%09red
Estrogen signaling pathway	KEGG PATHWAY	ssc04915	3	97	0.574992	0.902236	ENSSSCG00000027952|ENSSSCG00000005285|ENSSSCG00000003395	ssc:100155970|ssc:654405|ssc:100518131|	100155970|654405|100518131|	ADCY5|GNAQ|PIK3CD|	http://www.genome.jp/kegg-bin/show_pathway?ssc04915/ssc:100518131%09red/ssc:654405%09red/ssc:100155970%09red
Signaling pathways regulating pluripotency of stem cells	KEGG PATHWAY	ssc04550	4	132	0.579114	0.902236	ENSSSCG00000000183|ENSSSCG00000000182|ENSSSCG00000003395|ENSSSCG00000015815	ssc:100525462|ssc:100126276|ssc:100518131|ssc:100153248|	100525462|100126276|100518131|100153248|	WNT1|WNT10B|PIK3CD|FGFR1|	http://www.genome.jp/kegg-bin/show_pathway?ssc04550/ssc:100518131%09red/ssc:100525462%09red/ssc:100126276%09red/ssc:100153248%09red
Circadian entrainment	KEGG PATHWAY	ssc04713	3	98	0.581762	0.902236	ENSSSCG00000027952|ENSSSCG00000005285|ENSSSCG00000007833	ssc:100155970|ssc:654405|ssc:100522792|	100155970|654405|100522792|	ADCY5|GNAQ| |	http://www.genome.jp/kegg-bin/show_pathway?ssc04713/ssc:654405%09red/ssc:100522792%09red/ssc:100155970%09red
Galactose metabolism	KEGG PATHWAY	ssc00052	1	28	0.583719	0.902236	ENSSSCG00000026793	ssc:100736821|	100736821|	B4GALT2|	http://www.genome.jp/kegg-bin/show_pathway?ssc00052/ssc:100736821%09red
Renal cell carcinoma	KEGG PATHWAY	ssc05211	2	64	0.588415	0.902236	ENSSSCG00000003395|ENSSSCG00000026816	ssc:100518131|ssc:100620540|	100518131|100620540|	PIK3CD| |	http://www.genome.jp/kegg-bin/show_pathway?ssc05211/ssc:100518131%09red/ssc:100620540%09red
Endocytosis	KEGG PATHWAY	ssc04144	6	206	0.606199	0.90744	ENSSSCG00000030731|ENSSSCG00000024344|ENSSSCG00000006137|ENSSSCG00000028759|ENSSSCG00000016857|ENSSSCG00000017787	ssc:100135031|ssc:414371|ssc:100157283|ssc:100153066|ssc:100519746|ssc:100520151|	100135031|414371|100157283|100153066|100519746|100520151|	SLA-2, SLA-B|CCR5|WWP1|ASAP1|DAB2|GIT1|	http://www.genome.jp/kegg-bin/show_pathway?ssc04144/ssc:100157283%09red/ssc:100135031%09red/ssc:414371%09red/ssc:100153066%09red/ssc:100520151%09red/ssc:100519746%09red
Tuberculosis	KEGG PATHWAY	ssc05152	5	174	0.618718	0.90744	ENSSSCG00000010380|ENSSSCG00000016058|ENSSSCG00000017755|ENSSSCG00000017753|ENSSSCG00000016057	ssc:396610|ssc:396655|ssc:396859|ssc:100511282|ssc:396655|	396610|396655|396859|100511282|396655|	MAPK8, JNK, JNK1|STAT1|NOS2, INOS, NOS2a|KSR1|STAT1|	http://www.genome.jp/kegg-bin/show_pathway?ssc05152/ssc:396610%09red/ssc:396655%09red/ssc:100511282%09red/ssc:396859%09red
Long-term potentiation	KEGG PATHWAY	ssc04720	2	68	0.62053	0.90744	ENSSSCG00000005285|ENSSSCG00000007833	ssc:654405|ssc:100522792|	654405|100522792|	GNAQ| |	http://www.genome.jp/kegg-bin/show_pathway?ssc04720/ssc:654405%09red/ssc:100522792%09red
Melanoma	KEGG PATHWAY	ssc05218	2	69	0.628251	0.90744	ENSSSCG00000003395|ENSSSCG00000015815	ssc:100518131|ssc:100153248|	100518131|100153248|	PIK3CD|FGFR1|	http://www.genome.jp/kegg-bin/show_pathway?ssc05218/ssc:100518131%09red/ssc:100153248%09red
Chronic myeloid leukemia	KEGG PATHWAY	ssc05220	2	69	0.628251	0.90744	ENSSSCG00000003395|ENSSSCG00000026816	ssc:100518131|ssc:100620540|	100518131|100620540|	PIK3CD| |	http://www.genome.jp/kegg-bin/show_pathway?ssc05220/ssc:100518131%09red/ssc:100620540%09red
Adrenergic signaling in cardiomyocytes	KEGG PATHWAY	ssc04261	4	141	0.629606	0.90744	ENSSSCG00000027952|ENSSSCG00000005285|ENSSSCG00000003395|ENSSSCG00000014298	ssc:100155970|ssc:654405|ssc:100518131|ssc:397656|	100155970|654405|100518131|397656|	ADCY5|GNAQ|PIK3CD|PPP2CA|	http://www.genome.jp/kegg-bin/show_pathway?ssc04261/ssc:100518131%09red/ssc:654405%09red/ssc:100155970%09red/ssc:397656%09red
T cell receptor signaling pathway	KEGG PATHWAY	ssc04660	3	107	0.639537	0.90744	ENSSSCG00000007356|ENSSSCG00000003395|ENSSSCG00000014278	ssc:100152497|ssc:100518131|ssc:397409|	100152497|100518131|397409|	PLCG1|PIK3CD|IL-5, IL5|	http://www.genome.jp/kegg-bin/show_pathway?ssc04660/ssc:100518131%09red/ssc:100152497%09red/ssc:397409%09red
Oocyte meiosis	KEGG PATHWAY	ssc04114	3	107	0.639537	0.90744	ENSSSCG00000006062|ENSSSCG00000027952|ENSSSCG00000014298	ssc:780440|ssc:100155970|ssc:397656|	780440|100155970|397656|	YWHAZ|ADCY5|PPP2CA|	http://www.genome.jp/kegg-bin/show_pathway?ssc04114/ssc:397656%09red/ssc:780440%09red/ssc:100155970%09red
MAPK signaling pathway	KEGG PATHWAY	ssc04010	7	249	0.641976	0.90744	ENSSSCG00000010380|ENSSSCG00000003573|ENSSSCG00000015815|ENSSSCG00000004110|ENSSSCG00000007151|ENSSSCG00000006074|ENSSSCG00000007833	ssc:396610|ssc:100512235|ssc:100153248|ssc:100156182|ssc:100329127|ssc:100524741|ssc:100522792|	396610|100512235|100153248|100156182|100329127|100524741|100522792|	MAPK8, JNK, JNK1|MAP3K6|FGFR1|TAB2|CDC25B|STK3| |	http://www.genome.jp/kegg-bin/show_pathway?ssc04010/ssc:100522792%09red/ssc:100524741%09red/ssc:100329127%09red/ssc:100156182%09red/ssc:396610%09red/ssc:100153248%09red/ssc:100512235%09red
Tyrosine metabolism	KEGG PATHWAY	ssc00350	1	33	0.642138	0.90744	ENSSSCG00000002396	ssc:100626791|	100626791|	GSTZ1|	http://www.genome.jp/kegg-bin/show_pathway?ssc00350/ssc:100626791%09red
Fat digestion and absorption	KEGG PATHWAY	ssc04975	1	34	0.6528	0.90744	ENSSSCG00000003839	ssc:100512419|	100512419|	PPAP2B|	http://www.genome.jp/kegg-bin/show_pathway?ssc04975/ssc:100512419%09red
Prion diseases	KEGG PATHWAY	ssc05020	1	34	0.6528	0.90744	ENSSSCG00000016856	ssc:100037951|	100037951|	|	http://www.genome.jp/kegg-bin/show_pathway?ssc05020/ssc:100037951%09red
Cell adhesion molecules (CAMs)	KEGG PATHWAY	ssc04514	4	146	0.655921	0.90744	ENSSSCG00000005210|ENSSSCG00000005211|ENSSSCG00000030731|ENSSSCG00000023028	ssc:574057|ssc:574058|ssc:100135031|ssc:100621244|	574057|574058|100135031|100621244|	PDCD1LG2, PDL2|CD274, PDL1|SLA-2, SLA-B|JAM2|	http://www.genome.jp/kegg-bin/show_pathway?ssc04514/ssc:100135031%09red/ssc:574057%09red/ssc:574058%09red/ssc:100621244%09red
Graft-versus-host disease	KEGG PATHWAY	ssc05332	1	35	0.663144	0.91024	ENSSSCG00000030731	ssc:100135031|	100135031|	SLA-2, SLA-B|	http://www.genome.jp/kegg-bin/show_pathway?ssc05332/ssc:100135031%09red
Serotonergic synapse	KEGG PATHWAY	ssc04726	3	112	0.669118	0.91024	ENSSSCG00000027952|ENSSSCG00000005285|ENSSSCG00000007833	ssc:100155970|ssc:654405|ssc:100522792|	100155970|654405|100522792|	ADCY5|GNAQ| |	http://www.genome.jp/kegg-bin/show_pathway?ssc04726/ssc:654405%09red/ssc:100522792%09red/ssc:100155970%09red
SNARE interactions in vesicular transport	KEGG PATHWAY	ssc04130	1	36	0.673181	0.91024	ENSSSCG00000004727	ssc:100512755|	100512755|	SNAP23|	http://www.genome.jp/kegg-bin/show_pathway?ssc04130/ssc:100512755%09red
Cysteine and methionine metabolism	KEGG PATHWAY	ssc00270	1	37	0.68292	0.91024	ENSSSCG00000014219	ssc:100312964|	100312964|	CDO1|	http://www.genome.jp/kegg-bin/show_pathway?ssc00270/ssc:100312964%09red
Viral carcinogenesis	KEGG PATHWAY	ssc05203	5	189	0.688116	0.91024	ENSSSCG00000006062|ENSSSCG00000003395|ENSSSCG00000025181|ENSSSCG00000030731|ENSSSCG00000024344	ssc:780440|ssc:100518131|ssc:100523731|ssc:100135031|ssc:414371|	780440|100518131|100523731|100135031|414371|	YWHAZ|PIK3CD| |SLA-2, SLA-B|CCR5|	http://www.genome.jp/kegg-bin/show_pathway?ssc05203/ssc:100518131%09red/ssc:100523731%09red/ssc:780440%09red/ssc:100135031%09red/ssc:414371%09red
Peroxisome	KEGG PATHWAY	ssc04146	2	80	0.705216	0.91024	ENSSSCG00000003405|ENSSSCG00000017755	ssc:100522811|ssc:396859|	100522811|396859|	PEX14|NOS2, INOS, NOS2a|	http://www.genome.jp/kegg-bin/show_pathway?ssc04146/ssc:100522811%09red/ssc:396859%09red
Focal adhesion	KEGG PATHWAY	ssc04510	5	194	0.709241	0.91024	ENSSSCG00000010380|ENSSSCG00000025095|ENSSSCG00000003395|ENSSSCG00000009544|ENSSSCG00000007833	ssc:396610|ssc:397190|ssc:100518131|ssc:100515336|ssc:100522792|	396610|397190|100518131|100515336|100522792|	MAPK8, JNK, JNK1|PPP1R12A, MYPT1|PIK3CD|COL4A1| |	http://www.genome.jp/kegg-bin/show_pathway?ssc04510/ssc:100518131%09red/ssc:396610%09red/ssc:100515336%09red/ssc:397190%09red/ssc:100522792%09red
ECM-receptor interaction	KEGG PATHWAY	ssc04512	2	82	0.71769	0.91024	ENSSSCG00000022204|ENSSSCG00000009544	ssc:100623869|ssc:100515336|	100623869|100515336|	AGRN|COL4A1|	http://www.genome.jp/kegg-bin/show_pathway?ssc04512/ssc:100623869%09red/ssc:100515336%09red
Glycerophospholipid metabolism	KEGG PATHWAY	ssc00564	2	83	0.723759	0.91024	ENSSSCG00000017615|ENSSSCG00000003839	ssc:100312967|ssc:100512419|	100312967|100512419|	DGKE|PPAP2B|	http://www.genome.jp/kegg-bin/show_pathway?ssc00564/ssc:100312967%09red/ssc:100512419%09red
Regulation of actin cytoskeleton	KEGG PATHWAY	ssc04810	5	198	0.725404	0.91024	ENSSSCG00000025095|ENSSSCG00000003395|ENSSSCG00000003577|ENSSSCG00000015815|ENSSSCG00000017787	ssc:397190|ssc:100518131|ssc:100512789|ssc:100153248|ssc:100520151|	397190|100518131|100512789|100153248|100520151|	PPP1R12A, MYPT1|PIK3CD|WASF2|FGFR1|GIT1|	http://www.genome.jp/kegg-bin/show_pathway?ssc04810/ssc:100518131%09red/ssc:100520151%09red/ssc:397190%09red/ssc:100153248%09red/ssc:100512789%09red
Mineral absorption	KEGG PATHWAY	ssc04978	1	42	0.727433	0.91024	ENSSSCG00000016195	ssc:397035|	397035|	FTL|	http://www.genome.jp/kegg-bin/show_pathway?ssc04978/ssc:397035%09red
Type I diabetes mellitus	KEGG PATHWAY	ssc04940	1	42	0.727433	0.91024	ENSSSCG00000030731	ssc:100135031|	100135031|	SLA-2, SLA-B|	http://www.genome.jp/kegg-bin/show_pathway?ssc04940/ssc:100135031%09red
Glutamatergic synapse	KEGG PATHWAY	ssc04724	3	123	0.727829	0.91024	ENSSSCG00000027952|ENSSSCG00000005285|ENSSSCG00000007833	ssc:100155970|ssc:654405|ssc:100522792|	100155970|654405|100522792|	ADCY5|GNAQ| |	http://www.genome.jp/kegg-bin/show_pathway?ssc04724/ssc:654405%09red/ssc:100522792%09red/ssc:100155970%09red
mRNA surveillance pathway	KEGG PATHWAY	ssc03015	2	84	0.729718	0.91024	ENSSSCG00000006063|ENSSSCG00000014298	ssc:100153958|ssc:397656|	100153958|397656|	PABPC1|PPP2CA|	http://www.genome.jp/kegg-bin/show_pathway?ssc03015/ssc:397656%09red/ssc:100153958%09red
GABAergic synapse	KEGG PATHWAY	ssc04727	2	85	0.735567	0.91024	ENSSSCG00000027952|ENSSSCG00000007833	ssc:100155970|ssc:100522792|	100155970|100522792|	ADCY5| |	http://www.genome.jp/kegg-bin/show_pathway?ssc04727/ssc:100522792%09red/ssc:100155970%09red
cAMP signaling pathway	KEGG PATHWAY	ssc04024	5	201	0.737096	0.91024	ENSSSCG00000008730|ENSSSCG00000025095|ENSSSCG00000003395|ENSSSCG00000010380|ENSSSCG00000027952	ssc:100144487|ssc:397190|ssc:100518131|ssc:396610|ssc:100155970|	100144487|397190|100518131|396610|100155970|	DRD1|PPP1R12A, MYPT1|PIK3CD|MAPK8, JNK, JNK1|ADCY5|	http://www.genome.jp/kegg-bin/show_pathway?ssc04024/ssc:100518131%09red/ssc:396610%09red/ssc:397190%09red/ssc:100155970%09red/ssc:100144487%09red
Intestinal immune network for IgA production	KEGG PATHWAY	ssc04672	1	44	0.743439	0.911952	ENSSSCG00000014278	ssc:397409|	397409|	IL-5, IL5|	http://www.genome.jp/kegg-bin/show_pathway?ssc04672/ssc:397409%09red
Proteasome	KEGG PATHWAY	ssc03050	1	46	0.758506	0.924272	ENSSSCG00000008412	ssc:100517820|	100517820|	PSME4|	http://www.genome.jp/kegg-bin/show_pathway?ssc03050/ssc:100517820%09red
Apoptosis	KEGG PATHWAY	ssc04210	2	91	0.768434	0.927125	ENSSSCG00000003395|ENSSSCG00000003404	ssc:100518131|ssc:100523126|	100518131|100523126|	PIK3CD|DFFA|	http://www.genome.jp/kegg-bin/show_pathway?ssc04210/ssc:100518131%09red/ssc:100523126%09red
Starch and sucrose metabolism	KEGG PATHWAY	ssc00500	1	49	0.779466	0.927125	ENSSSCG00000021417	ssc:100522672|	100522672|	|	http://www.genome.jp/kegg-bin/show_pathway?ssc00500/ssc:100522672%09red
Alzheimer's disease	KEGG PATHWAY	ssc05010	4	175	0.78308	0.927125	ENSSSCG00000005285|ENSSSCG00000017730|ENSSSCG00000022586|ENSSSCG00000013229	ssc:654405|ssc:100113467|ssc:100621056|ssc:100510948|	654405|100113467|100621056|100510948|	GNAQ|CDK5R1| |NDUFS3|	http://www.genome.jp/kegg-bin/show_pathway?ssc05010/ssc:654405%09red/ssc:100510948%09red/ssc:100621056%09red/ssc:100113467%09red
PI3K-Akt signaling pathway	KEGG PATHWAY	ssc04151	8	328	0.785436	0.927125	ENSSSCG00000003395|ENSSSCG00000003837|ENSSSCG00000015815|ENSSSCG00000014298|ENSSSCG00000006062|ENSSSCG00000025729|ENSSSCG00000009544|ENSSSCG00000005209	ssc:100518131|ssc:397504|ssc:100153248|ssc:397656|ssc:780440|ssc:100512686|ssc:100515336|ssc:100038023|	100518131|397504|100153248|397656|780440|100512686|100515336|100038023|	PIK3CD|PRKAA2, AMPKA2|FGFR1|PPP2CA|YWHAZ|IRS1|COL4A1|RPS6|	http://www.genome.jp/kegg-bin/show_pathway?ssc04151/ssc:100518131%09red/ssc:100038023%09red/ssc:100515336%09red/ssc:397504%09red/ssc:100512686%09red/ssc:397656%09red/ssc:100153248%09red/ssc:780440%09red
Glutathione metabolism	KEGG PATHWAY	ssc00480	1	50	0.786041	0.927125	ENSSSCG00000003402	ssc:397546|	397546|	PGD|	http://www.genome.jp/kegg-bin/show_pathway?ssc00480/ssc:397546%09red
Ovarian steroidogenesis	KEGG PATHWAY	ssc04913	1	51	0.79242	0.928696	ENSSSCG00000027952	ssc:100155970|	100155970|	ADCY5|	http://www.genome.jp/kegg-bin/show_pathway?ssc04913/ssc:100155970%09red
Alcoholism	KEGG PATHWAY	ssc05034	3	143	0.813249	0.94441	ENSSSCG00000008730|ENSSSCG00000027952|ENSSSCG00000006215	ssc:100144487|ssc:100155970|ssc:100127468|	100144487|100155970|100127468|	DRD1|ADCY5|CRH|	http://www.genome.jp/kegg-bin/show_pathway?ssc05034/ssc:100127468%09red/ssc:100155970%09red/ssc:100144487%09red
Arginine and proline metabolism	KEGG PATHWAY	ssc00330	1	55	0.816093	0.94441	ENSSSCG00000017755	ssc:396859|	396859|	NOS2, INOS, NOS2a|	http://www.genome.jp/kegg-bin/show_pathway?ssc00330/ssc:396859%09red
Viral myocarditis	KEGG PATHWAY	ssc05416	1	63	0.855657	0.976137	ENSSSCG00000030731	ssc:100135031|	100135031|	SLA-2, SLA-B|	http://www.genome.jp/kegg-bin/show_pathway?ssc05416/ssc:100135031%09red
Cell cycle	KEGG PATHWAY	ssc04110	2	115	0.866702	0.976137	ENSSSCG00000006062|ENSSSCG00000007151	ssc:780440|ssc:100329127|	780440|100329127|	YWHAZ|CDC25B|	http://www.genome.jp/kegg-bin/show_pathway?ssc04110/ssc:780440%09red/ssc:100329127%09red
Arrhythmogenic right ventricular cardiomyopathy (ARVC)	KEGG PATHWAY	ssc05412	1	67	0.872126	0.976137	ENSSSCG00000030680	ssc:100170126|	100170126|	LEF1|	http://www.genome.jp/kegg-bin/show_pathway?ssc05412/ssc:100170126%09red
Aminoacyl-tRNA biosynthesis	KEGG PATHWAY	ssc00970	1	68	0.875941	0.976137	ENSSSCG00000002516	ssc:100515390|	100515390|	WARS|	http://www.genome.jp/kegg-bin/show_pathway?ssc00970/ssc:100515390%09red
Antigen processing and presentation	KEGG PATHWAY	ssc04612	1	68	0.875941	0.976137	ENSSSCG00000030731	ssc:100135031|	100135031|	SLA-2, SLA-B|	http://www.genome.jp/kegg-bin/show_pathway?ssc04612/ssc:100135031%09red
Bile secretion	KEGG PATHWAY	ssc04976	1	69	0.879643	0.976137	ENSSSCG00000027952	ssc:100155970|	100155970|	ADCY5|	http://www.genome.jp/kegg-bin/show_pathway?ssc04976/ssc:100155970%09red
HTLV-I infection	KEGG PATHWAY	ssc05166	5	253	0.885258	0.976137	ENSSSCG00000000183|ENSSSCG00000000182|ENSSSCG00000003395|ENSSSCG00000030731|ENSSSCG00000027952	ssc:100525462|ssc:100126276|ssc:100518131|ssc:100135031|ssc:100155970|	100525462|100126276|100518131|100135031|100155970|	WNT1|WNT10B|PIK3CD|SLA-2, SLA-B|ADCY5|	http://www.genome.jp/kegg-bin/show_pathway?ssc05166/ssc:100518131%09red/ssc:100525462%09red/ssc:100135031%09red/ssc:100126276%09red/ssc:100155970%09red
B cell receptor signaling pathway	KEGG PATHWAY	ssc04662	1	72	0.890099	0.976137	ENSSSCG00000003395	ssc:100518131|	100518131|	PIK3CD|	http://www.genome.jp/kegg-bin/show_pathway?ssc04662/ssc:100518131%09red
Complement and coagulation cascades	KEGG PATHWAY	ssc04610	1	73	0.893379	0.976137	ENSSSCG00000016856	ssc:100037951|	100037951|	|	http://www.genome.jp/kegg-bin/show_pathway?ssc04610/ssc:100037951%09red
TGF-beta signaling pathway	KEGG PATHWAY	ssc04350	1	74	0.896561	0.976137	ENSSSCG00000014298	ssc:397656|	397656|	PPP2CA|	http://www.genome.jp/kegg-bin/show_pathway?ssc04350/ssc:397656%09red
Protein digestion and absorption	KEGG PATHWAY	ssc04974	1	80	0.913757	0.982046	ENSSSCG00000009544	ssc:100515336|	100515336|	COL4A1|	http://www.genome.jp/kegg-bin/show_pathway?ssc04974/ssc:100515336%09red
Oxidative phosphorylation	KEGG PATHWAY	ssc00190	2	134	0.915565	0.982046	ENSSSCG00000022586|ENSSSCG00000013229	ssc:100621056|ssc:100510948|	100621056|100510948|	|NDUFS3|	http://www.genome.jp/kegg-bin/show_pathway?ssc00190/ssc:100621056%09red/ssc:100510948%09red
Dilated cardiomyopathy	KEGG PATHWAY	ssc05414	1	84	0.923604	0.982046	ENSSSCG00000027952	ssc:100155970|	100155970|	ADCY5|	http://www.genome.jp/kegg-bin/show_pathway?ssc05414/ssc:100155970%09red
Hematopoietic cell lineage	KEGG PATHWAY	ssc04640	1	85	0.925885	0.982046	ENSSSCG00000014278	ssc:397409|	397409|	IL-5, IL5|	http://www.genome.jp/kegg-bin/show_pathway?ssc04640/ssc:397409%09red
Huntington's disease	KEGG PATHWAY	ssc05016	3	190	0.929213	0.982046	ENSSSCG00000005285|ENSSSCG00000022586|ENSSSCG00000013229	ssc:654405|ssc:100621056|ssc:100510948|	654405|100621056|100510948|	GNAQ| |NDUFS3|	http://www.genome.jp/kegg-bin/show_pathway?ssc05016/ssc:654405%09red/ssc:100510948%09red/ssc:100621056%09red
Phagosome	KEGG PATHWAY	ssc04145	2	147	0.9387	0.982046	ENSSSCG00000030731|ENSSSCG00000000193	ssc:100135031|ssc:100135051|	100135031|100135051|	SLA-2, SLA-B| |	http://www.genome.jp/kegg-bin/show_pathway?ssc04145/ssc:100135031%09red/ssc:100135051%09red
RNA transport	KEGG PATHWAY	ssc03013	2	149	0.941676	0.982046	ENSSSCG00000006063|ENSSSCG00000015576	ssc:100153958|ssc:100520507|	100153958|100520507|	PABPC1|TPR|	http://www.genome.jp/kegg-bin/show_pathway?ssc03013/ssc:100520507%09red/ssc:100153958%09red
Transcriptional misregulation in cancer	KEGG PATHWAY	ssc05202	2	156	0.951044	0.982046	ENSSSCG00000002283|ENSSSCG00000005101	ssc:396933|ssc:100359361|	396933|100359361|	FUT8| |	http://www.genome.jp/kegg-bin/show_pathway?ssc05202/ssc:100359361%09red/ssc:396933%09red
Carbon metabolism	KEGG PATHWAY	ssc01200	1	99	0.951522	0.982046	ENSSSCG00000003402	ssc:397546|	397546|	PGD|	http://www.genome.jp/kegg-bin/show_pathway?ssc01200/ssc:397546%09red
Systemic lupus erythematosus	KEGG PATHWAY	ssc05322	1	102	0.955739	0.982046	ENSSSCG00000016856	ssc:100037951|	100037951|	|	http://www.genome.jp/kegg-bin/show_pathway?ssc05322/ssc:100037951%09red
Neuroactive ligand-receptor interaction	KEGG PATHWAY	ssc04080	4	268	0.962988	0.982046	ENSSSCG00000008730|ENSSSCG00000017872|ENSSSCG00000011716|ENSSSCG00000017998	ssc:100144487|ssc:100739675|ssc:100524766|ssc:100515966|	100144487|100739675|100524766|100515966|	DRD1| |P2RY13|GLP2R|	http://www.genome.jp/kegg-bin/show_pathway?ssc04080/ssc:100515966%09red/ssc:100739675%09red/ssc:100524766%09red/ssc:100144487%09red
Cytokine-cytokine receptor interaction	KEGG PATHWAY	ssc04060	3	223	0.966035	0.982046	ENSSSCG00000024311|ENSSSCG00000014278|ENSSSCG00000024344	ssc:414372|ssc:397409|ssc:414371|	414372|397409|414371|	CCR2|IL-5, IL5|CCR5|	http://www.genome.jp/kegg-bin/show_pathway?ssc04060/ssc:414371%09red/ssc:414372%09red/ssc:397409%09red
Axon guidance	KEGG PATHWAY	ssc04360	1	119	0.973577	0.984276	ENSSSCG00000024746	ssc:100525283|	100525283|	SEMA4C|	http://www.genome.jp/kegg-bin/show_pathway?ssc04360/ssc:100525283%09red
Metabolic pathways	KEGG PATHWAY	ssc01100	19	1166	0.999276	0.999378	ENSSSCG00000003808|ENSSSCG00000013229|ENSSSCG00000016192|ENSSSCG00000014219|ENSSSCG00000022586|ENSSSCG00000002283|ENSSSCG00000003402|ENSSSCG00000029007|ENSSSCG00000007356|ENSSSCG00000021417|ENSSSCG00000029461|ENSSSCG00000024027|ENSSSCG00000002396|ENSSSCG00000017755|ENSSSCG00000002512|ENSSSCG00000017615|ENSSSCG00000014841|ENSSSCG00000003839|ENSSSCG00000026793	ssc:733667|ssc:100510948|ssc:397119|ssc:100312964|ssc:100621056|ssc:396933|ssc:397546|ssc:100525046|ssc:100152497|ssc:100522672|ssc:396619|ssc:100523683|ssc:100626791|ssc:396859|ssc:100739329|ssc:100312967|ssc:100739011|ssc:100512419|ssc:100736821|	733667|100510948|397119|100312964|100621056|396933|397546|100525046|100152497|100522672|396619|100523683|100626791|396859|100739329|100312967|100739011|100512419|100736821|	AK3L1, AK3|NDUFS3|PLCD4|CDO1| |FUT8|PGD| |PLCG1| |ST3GAL3, ST3GAL-III|PAFAH1B2|GSTZ1|NOS2, INOS, NOS2a| |DGKE| |PPAP2B|B4GALT2|	http://www.genome.jp/kegg-bin/show_pathway?ssc01100/ssc:100739011%09red/ssc:100312967%09red/ssc:100312964%09red/ssc:100736821%09red/ssc:100522672%09red/ssc:733667%09red/ssc:100621056%09red/ssc:396619%09red/ssc:100510948%09red/ssc:100523683%09red/ssc:397546%09red/ssc:396933%09red/ssc:396859%09red/ssc:100525046%09red/ssc:100152497%09red/ssc:100626791%09red/ssc:397119%09red/ssc:100739329%09red/ssc:1…
Olfactory transduction	KEGG PATHWAY	ssc04740	11	810	0.999378	0.999378	ENSSSCG00000014608|ENSSSCG00000023061|ENSSSCG00000028131|ENSSSCG00000014612|ENSSSCG00000016455|ENSSSCG00000015578|ENSSSCG00000022928|ENSSSCG00000014614|ENSSSCG00000014617|ENSSSCG00000024421|ENSSSCG00000020877	ssc:100525352|ssc:100511945|ssc:100738899|ssc:100738602|ssc:100519633|ssc:100518570|ssc:100738602|ssc:100738640|ssc:100738942|ssc:100738816|ssc:100738816|	100525352|100511945|100738899|100738602|100519633|100518570|100738602|100738640|100738942|100738816|100738816|	| | | | |PDC| | | | | |	http://www.genome.jp/kegg-bin/show_pathway?ssc04740/ssc:100511945%09red/ssc:100525352%09red/ssc:100519633%09red/ssc:100738602%09red/ssc:100738899%09red/ssc:100738816%09red/ssc:100738942%09red/ssc:100518570%09red/ssc:100738640%09red
--------------------
#Term	Database	ID	Input number	Background number	P-Value	Corrected P-Value	Input	KO	Entrez_ID	KO_name	Hyperlink
--------------------
#Term	Database	ID	Input number	Background number	P-Value	Corrected P-Value	Input	KO	Entrez_ID	KO_name	Hyperlink
--------------------

## Sheet: VR2332 Down
##Databases: KEGG PATHWAY
##Statistical test method: hypergeometric test / Fisher's exact test
##FDR correction method: Benjamini and Hochberg
#Term	Database	ID	Input number	Background number	P-Value	Corrected P-Value	Input	KO	Entrez_ID	KO_name	Hyperlink
Inflammatory bowel disease (IBD)	KEGG PATHWAY	ssc05321	6	62	0.00024388	0.0373136	ENSSSCG00000023016|ENSSSCG00000004156|ENSSSCG00000017044|ENSSSCG00000016058|ENSSSCG00000021437|ENSSSCG00000016057	ssc:397261|ssc:100152238|ssc:397076|ssc:396655|ssc:397261|ssc:396655|	397261|100152238|397076|396655|397261|396655|	STAT4|IFNGR1|IL12B|STAT1|STAT4|STAT1|	http://www.genome.jp/kegg-bin/show_pathway?ssc05321/ssc:396655%09red/ssc:397261%09red/ssc:100152238%09red/ssc:397076%09red
Riboflavin metabolism	KEGG PATHWAY	ssc00740	3	13	0.00104763	0.0801438	ENSSSCG00000011627|ENSSSCG00000005276|ENSSSCG00000008659	ssc:100302507|ssc:100520822|ssc:100737301|	100302507|100520822|100737301|	ACPP|RFK|ACP1, LMW-PTP, LMW-PTPase|	http://www.genome.jp/kegg-bin/show_pathway?ssc00740/ssc:100520822%09red/ssc:100737301%09red/ssc:100302507%09red
Jak-STAT signaling pathway	KEGG PATHWAY	ssc04630	7	153	0.00481135	0.245379	ENSSSCG00000023016|ENSSSCG00000004156|ENSSSCG00000017044|ENSSSCG00000016058|ENSSSCG00000021437|ENSSSCG00000007973|ENSSSCG00000016057	ssc:397261|ssc:100152238|ssc:397076|ssc:396655|ssc:397261|ssc:100521616|ssc:396655|	397261|100152238|397076|396655|397261|100521616|396655|	STAT4|IFNGR1|IL12B|STAT1|STAT4|IL9R|STAT1|	http://www.genome.jp/kegg-bin/show_pathway?ssc04630/ssc:396655%09red/ssc:397261%09red/ssc:100152238%09red/ssc:100521616%09red/ssc:397076%09red
Hepatitis C	KEGG PATHWAY	ssc05160	6	127	0.00763865	0.292178	ENSSSCG00000009134|ENSSSCG00000030344|ENSSSCG00000007143|ENSSSCG00000016058|ENSSSCG00000016057|ENSSSCG00000015842	ssc:397083|ssc:100294682|ssc:100037290|ssc:396655|ssc:396655|ssc:397656|	397083|100294682|100037290|396655|396655|397656|	EGF|CLDN19|MAVS, VISA|STAT1|STAT1|PPP2CA|	http://www.genome.jp/kegg-bin/show_pathway?ssc05160/ssc:100037290%09red/ssc:396655%09red/ssc:100294682%09red/ssc:397083%09red/ssc:397656%09red
Leishmaniasis	KEGG PATHWAY	ssc05140	4	63	0.0109715	0.294251	ENSSSCG00000016058|ENSSSCG00000004156|ENSSSCG00000017044|ENSSSCG00000016057	ssc:396655|ssc:100152238|ssc:397076|ssc:396655|	396655|100152238|397076|396655|	STAT1|IFNGR1|IL12B|STAT1|	http://www.genome.jp/kegg-bin/show_pathway?ssc05140/ssc:396655%09red/ssc:100152238%09red/ssc:397076%09red
Herpes simplex infection	KEGG PATHWAY	ssc05168	7	182	0.0115393	0.294251	ENSSSCG00000004156|ENSSSCG00000017044|ENSSSCG00000007143|ENSSSCG00000016058|ENSSSCG00000030888|ENSSSCG00000006954|ENSSSCG00000016057	ssc:100152238|ssc:397076|ssc:100037290|ssc:396655|ssc:595129|ssc:100737048|ssc:396655|	100152238|397076|100037290|396655|595129|100737048|396655|	IFNGR1|IL12B|MAVS, VISA|STAT1|FADD, TNFRSF6|EEF1D|STAT1|	http://www.genome.jp/kegg-bin/show_pathway?ssc05168/ssc:397076%09red/ssc:100737048%09red/ssc:100152238%09red/ssc:100037290%09red/ssc:595129%09red/ssc:396655%09red
Chagas disease (American trypanosomiasis)	KEGG PATHWAY	ssc05142	5	108	0.015611	0.312413	ENSSSCG00000030888|ENSSSCG00000004156|ENSSSCG00000015842|ENSSSCG00000017044|ENSSSCG00000013746	ssc:595129|ssc:100152238|ssc:397656|ssc:397076|ssc:100381266|	595129|100152238|397656|397076|100381266|	FADD, TNFRSF6|IFNGR1|PPP2CA|IL12B|CALR, CRP55, Calregulin, ERp60, HACBP|	http://www.genome.jp/kegg-bin/show_pathway?ssc05142/ssc:595129%09red/ssc:397076%09red/ssc:100381266%09red/ssc:100152238%09red/ssc:397656%09red
Hepatitis B	KEGG PATHWAY	ssc05161	6	151	0.0163353	0.312413	ENSSSCG00000023016|ENSSSCG00000007143|ENSSSCG00000016058|ENSSSCG00000021437|ENSSSCG00000030888|ENSSSCG00000016057	ssc:397261|ssc:100037290|ssc:396655|ssc:397261|ssc:595129|ssc:396655|	397261|100037290|396655|397261|595129|396655|	STAT4|MAVS, VISA|STAT1|STAT4|FADD, TNFRSF6|STAT1|	http://www.genome.jp/kegg-bin/show_pathway?ssc05161/ssc:100037290%09red/ssc:396655%09red/ssc:397261%09red/ssc:595129%09red
Influenza A	KEGG PATHWAY	ssc05164	6	168	0.0255748	0.434771	ENSSSCG00000004156|ENSSSCG00000017044|ENSSSCG00000007143|ENSSSCG00000016058|ENSSSCG00000007119|ENSSSCG00000016057	ssc:100152238|ssc:397076|ssc:100037290|ssc:396655|ssc:100514739|ssc:396655|	100152238|397076|100037290|396655|100514739|396655|	IFNGR1|IL12B|MAVS, VISA|STAT1|NXT1|STAT1|	http://www.genome.jp/kegg-bin/show_pathway?ssc05164/ssc:100037290%09red/ssc:396655%09red/ssc:100152238%09red/ssc:100514739%09red/ssc:397076%09red
Measles	KEGG PATHWAY	ssc05162	5	133	0.0333918	0.510894	ENSSSCG00000007143|ENSSSCG00000016058|ENSSSCG00000004156|ENSSSCG00000017044|ENSSSCG00000016057	ssc:100037290|ssc:396655|ssc:100152238|ssc:397076|ssc:396655|	100037290|396655|100152238|397076|396655|	MAVS, VISA|STAT1|IFNGR1|IL12B|STAT1|	http://www.genome.jp/kegg-bin/show_pathway?ssc05162/ssc:100037290%09red/ssc:396655%09red/ssc:100152238%09red/ssc:397076%09red
Toll-like receptor signaling pathway	KEGG PATHWAY	ssc04620	4	101	0.047041	0.652085	ENSSSCG00000030888|ENSSSCG00000016058|ENSSSCG00000016057|ENSSSCG00000017044	ssc:595129|ssc:396655|ssc:396655|ssc:397076|	595129|396655|396655|397076|	FADD, TNFRSF6|STAT1|STAT1|IL12B|	http://www.genome.jp/kegg-bin/show_pathway?ssc04620/ssc:595129%09red/ssc:396655%09red/ssc:397076%09red
Pancreatic cancer	KEGG PATHWAY	ssc05212	3	63	0.0535485	0.652085	ENSSSCG00000009134|ENSSSCG00000016058|ENSSSCG00000016057	ssc:397083|ssc:396655|ssc:396655|	397083|396655|396655|	EGF|STAT1|STAT1|	http://www.genome.jp/kegg-bin/show_pathway?ssc05212/ssc:396655%09red/ssc:397083%09red
Transcriptional misregulation in cancer	KEGG PATHWAY	ssc05202	5	156	0.057791	0.652085	ENSSSCG00000013019|ENSSSCG00000003876|ENSSSCG00000025182|ENSSSCG00000026547|ENSSSCG00000008645	ssc:100523533|ssc:100515210|ssc:100626141|ssc:100626235|ssc:654298|	100523533|100515210|100626141|100626235|654298|	MEN1| |ELK4|SLC45A3|ID2|	http://www.genome.jp/kegg-bin/show_pathway?ssc05202/ssc:654298%09red/ssc:100515210%09red/ssc:100523533%09red/ssc:100626141%09red/ssc:100626235%09red
RIG-I-like receptor signaling pathway	KEGG PATHWAY	ssc04622	3	68	0.0638752	0.652085	ENSSSCG00000007143|ENSSSCG00000017044|ENSSSCG00000030888	ssc:100037290|ssc:397076|ssc:595129|	100037290|397076|595129|	MAVS, VISA|IL12B|FADD, TNFRSF6|	http://www.genome.jp/kegg-bin/show_pathway?ssc04622/ssc:100037290%09red/ssc:397076%09red/ssc:595129%09red
Protein processing in endoplasmic reticulum	KEGG PATHWAY	ssc04141	5	162	0.0654761	0.652085	ENSSSCG00000003288|ENSSSCG00000011612|ENSSSCG00000013746|ENSSSCG00000013747|ENSSSCG00000004700	ssc:100518376|ssc:397606|ssc:100381266|ssc:100524483|ssc:100156204|	100518376|397606|100381266|100524483|100156204|	HSPBP1|RPN1|CALR, CRP55, Calregulin, ERp60, HACBP|RAD23A|PDIA3, grp-58|	http://www.genome.jp/kegg-bin/show_pathway?ssc04141/ssc:100524483%09red/ssc:397606%09red/ssc:100381266%09red/ssc:100518376%09red/ssc:100156204%09red
Toxoplasmosis	KEGG PATHWAY	ssc05145	4	115	0.0681919	0.652085	ENSSSCG00000016058|ENSSSCG00000004156|ENSSSCG00000017044|ENSSSCG00000016057	ssc:396655|ssc:100152238|ssc:397076|ssc:396655|	396655|100152238|397076|396655|	STAT1|IFNGR1|IL12B|STAT1|	http://www.genome.jp/kegg-bin/show_pathway?ssc05145/ssc:396655%09red/ssc:100152238%09red/ssc:397076%09red
African trypanosomiasis	KEGG PATHWAY	ssc05143	2	34	0.0783152	0.701008	ENSSSCG00000007978|ENSSSCG00000017044	ssc:100737768|ssc:397076|	100737768|397076|	|IL12B|	http://www.genome.jp/kegg-bin/show_pathway?ssc05143/ssc:100737768%09red/ssc:397076%09red
Tuberculosis	KEGG PATHWAY	ssc05152	5	174	0.0824716	0.701008	ENSSSCG00000030888|ENSSSCG00000016058|ENSSSCG00000004156|ENSSSCG00000017044|ENSSSCG00000016057	ssc:595129|ssc:396655|ssc:100152238|ssc:397076|ssc:396655|	595129|396655|100152238|397076|396655|	FADD, TNFRSF6|STAT1|IFNGR1|IL12B|STAT1|	http://www.genome.jp/kegg-bin/show_pathway?ssc05152/ssc:595129%09red/ssc:396655%09red/ssc:100152238%09red/ssc:397076%09red
Spliceosome	KEGG PATHWAY	ssc03040	4	129	0.0934534	0.751603	ENSSSCG00000003964|ENSSSCG00000011134|ENSSSCG00000000058|ENSSSCG00000029341	ssc:100523448|ssc:100515920|ssc:100155420|ssc:100622596|	100523448|100515920|100155420|100622596|	PPIH|RBM17|NHP2L1|ISY1|	http://www.genome.jp/kegg-bin/show_pathway?ssc03040/ssc:100155420%09red/ssc:100515920%09red/ssc:100622596%09red/ssc:100523448%09red
Ribosome biogenesis in eukaryotes	KEGG PATHWAY	ssc03008	3	83	0.0997291	0.751603	ENSSSCG00000007119|ENSSSCG00000000058|ENSSSCG00000020907	ssc:100514739|ssc:100155420|ssc:100516629|	100514739|100155420|100516629|	NXT1|NHP2L1|GAR1|	http://www.genome.jp/kegg-bin/show_pathway?ssc03008/ssc:100155420%09red/ssc:100516629%09red/ssc:100514739%09red
Ether lipid metabolism	KEGG PATHWAY	ssc00565	2	41	0.105969	0.751603	ENSSSCG00000003302|ENSSSCG00000009139	ssc:100514582|ssc:100517106|	100514582|100517106|	TMEM86B|PLA2G12A|	http://www.genome.jp/kegg-bin/show_pathway?ssc00565/ssc:100514582%09red/ssc:100517106%09red
Synthesis and degradation of ketone bodies	KEGG PATHWAY	ssc00072	1	8	0.110194	0.751603	ENSSSCG00000016872	ssc:100524223|	100524223|	HMGCS1|	http://www.genome.jp/kegg-bin/show_pathway?ssc00072/ssc:100524223%09red
MAPK signaling pathway	KEGG PATHWAY	ssc04010	6	249	0.112986	0.751603	ENSSSCG00000009134|ENSSSCG00000013020|ENSSSCG00000013023|ENSSSCG00000007151|ENSSSCG00000025182|ENSSSCG00000013754	ssc:397083|ssc:100523716|ssc:100626093|ssc:100329127|ssc:100626141|ssc:100525387|	397083|100523716|100626093|100329127|100626141|100525387|	EGF|MAP4K2|RASGRP2|CDC25B|ELK4|CACNA1A|	http://www.genome.jp/kegg-bin/show_pathway?ssc04010/ssc:100523716%09red/ssc:100329127%09red/ssc:397083%09red/ssc:100626093%09red/ssc:100525387%09red/ssc:100626141%09red
Nucleotide excision repair	KEGG PATHWAY	ssc03420	2	44	0.118516	0.755538	ENSSSCG00000013747|ENSSSCG00000008790	ssc:100524483|ssc:100511271|	100524483|100511271|	RAD23A|RFC1|	http://www.genome.jp/kegg-bin/show_pathway?ssc03420/ssc:100524483%09red/ssc:100511271%09red
Cell adhesion molecules (CAMs)	KEGG PATHWAY	ssc04514	4	146	0.129168	0.790506	ENSSSCG00000013024|ENSSSCG00000006352|ENSSSCG00000023162|ENSSSCG00000030344	ssc:100524236|ssc:100153273|ssc:100187727|ssc:100294682|	100524236|100153273|100187727|100294682|	NRXN2|MPZ|CDH15, CDH3, Cadherin-3|CLDN19|	http://www.genome.jp/kegg-bin/show_pathway?ssc04514/ssc:100153273%09red/ssc:100524236%09red/ssc:100187727%09red/ssc:100294682%09red
Starch and sucrose metabolism	KEGG PATHWAY	ssc00500	2	49	0.140174	0.819419	ENSSSCG00000030150|ENSSSCG00000013022	ssc:100627727|ssc:733659|	100627727|733659|	UGDH|PYGM|	http://www.genome.jp/kegg-bin/show_pathway?ssc00500/ssc:733659%09red/ssc:100627727%09red
Glutathione metabolism	KEGG PATHWAY	ssc00480	2	50	0.144603	0.819419	ENSSSCG00000015844|ENSSSCG00000005911	ssc:396625|ssc:100517090|	396625|100517090|	GSR|OPLAH|	http://www.genome.jp/kegg-bin/show_pathway?ssc00480/ssc:396625%09red/ssc:100517090%09red
HIF-1 signaling pathway	KEGG PATHWAY	ssc04066	3	104	0.160091	0.858163	ENSSSCG00000009134|ENSSSCG00000004156|ENSSSCG00000011133	ssc:397083|ssc:100152238|ssc:100516289|	397083|100152238|100516289|	EGF|IFNGR1| |	http://www.genome.jp/kegg-bin/show_pathway?ssc04066/ssc:100516289%09red/ssc:397083%09red/ssc:100152238%09red
Cytokine-cytokine receptor interaction	KEGG PATHWAY	ssc04060	5	223	0.172434	0.858163	ENSSSCG00000007973|ENSSSCG00000009134|ENSSSCG00000004156|ENSSSCG00000016871|ENSSSCG00000017044	ssc:100521616|ssc:397083|ssc:100152238|ssc:554303|ssc:397076|	100521616|397083|100152238|554303|397076|	IL9R|EGF|IFNGR1|CCL28, MEC|IL12B|	http://www.genome.jp/kegg-bin/show_pathway?ssc04060/ssc:397076%09red/ssc:100152238%09red/ssc:554303%09red/ssc:100521616%09red/ssc:397083%09red
Long-term depression	KEGG PATHWAY	ssc04730	2	59	0.185597	0.858163	ENSSSCG00000013754|ENSSSCG00000015842	ssc:100525387|ssc:397656|	100525387|397656|	CACNA1A|PPP2CA|	http://www.genome.jp/kegg-bin/show_pathway?ssc04730/ssc:397656%09red/ssc:100525387%09red
mTOR signaling pathway	KEGG PATHWAY	ssc04150	2	60	0.190253	0.858163	ENSSSCG00000018045|ENSSSCG00000017139	ssc:100525780|ssc:100512677|	100525780|100512677|	ULK2| |	http://www.genome.jp/kegg-bin/show_pathway?ssc04150/ssc:100525780%09red/ssc:100512677%09red
Cytosolic DNA-sensing pathway	KEGG PATHWAY	ssc04623	2	61	0.194924	0.858163	ENSSSCG00000007143|ENSSSCG00000007970	ssc:100037290|ssc:100521261|	100037290|100521261|	MAVS, VISA|POLR3K|	http://www.genome.jp/kegg-bin/show_pathway?ssc04623/ssc:100521261%09red/ssc:100037290%09red
Chemokine signaling pathway	KEGG PATHWAY	ssc04062	4	173	0.195263	0.858163	ENSSSCG00000016058|ENSSSCG00000013023|ENSSSCG00000016871|ENSSSCG00000016057	ssc:396655|ssc:100626093|ssc:554303|ssc:396655|	396655|100626093|554303|396655|	STAT1|RASGRP2|CCL28, MEC|STAT1|	http://www.genome.jp/kegg-bin/show_pathway?ssc04062/ssc:396655%09red/ssc:554303%09red/ssc:100626093%09red
AMPK signaling pathway	KEGG PATHWAY	ssc04152	3	118	0.205126	0.858163	ENSSSCG00000011133|ENSSSCG00000015842|ENSSSCG00000017139	ssc:100516289|ssc:397656|ssc:100512677|	100516289|397656|100512677|	|PPP2CA| |	http://www.genome.jp/kegg-bin/show_pathway?ssc04152/ssc:100516289%09red/ssc:397656%09red/ssc:100512677%09red
Prolactin signaling pathway	KEGG PATHWAY	ssc04917	2	67	0.223217	0.858163	ENSSSCG00000016058|ENSSSCG00000016057	ssc:396655|ssc:396655|	396655|396655|	STAT1|STAT1|	http://www.genome.jp/kegg-bin/show_pathway?ssc04917/ssc:396655%09red
Antigen processing and presentation	KEGG PATHWAY	ssc04612	2	68	0.227966	0.858163	ENSSSCG00000004700|ENSSSCG00000013746	ssc:100156204|ssc:100381266|	100156204|100381266|	PDIA3, grp-58|CALR, CRP55, Calregulin, ERp60, HACBP|	http://www.genome.jp/kegg-bin/show_pathway?ssc04612/ssc:100381266%09red/ssc:100156204%09red
Phenylalanine metabolism	KEGG PATHWAY	ssc00360	1	19	0.22857	0.858163	ENSSSCG00000018044	ssc:100526075|	100526075|	ALDH3A1|	http://www.genome.jp/kegg-bin/show_pathway?ssc00360/ssc:100526075%09red
Terpenoid backbone biosynthesis	KEGG PATHWAY	ssc00900	1	19	0.22857	0.858163	ENSSSCG00000016872	ssc:100524223|	100524223|	HMGCS1|	http://www.genome.jp/kegg-bin/show_pathway?ssc00900/ssc:100524223%09red
Glycosaminoglycan biosynthesis - chondroitin sulfate / dermatan sulfate	KEGG PATHWAY	ssc00532	1	21	0.248341	0.858163	ENSSSCG00000011625	ssc:100519444|	100519444|	CHST13|	http://www.genome.jp/kegg-bin/show_pathway?ssc00532/ssc:100519444%09red
Osteoclast differentiation	KEGG PATHWAY	ssc04380	3	133	0.256071	0.858163	ENSSSCG00000016058|ENSSSCG00000004156|ENSSSCG00000016057	ssc:396655|ssc:100152238|ssc:396655|	396655|100152238|396655|	STAT1|IFNGR1|STAT1|	http://www.genome.jp/kegg-bin/show_pathway?ssc04380/ssc:396655%09red/ssc:100152238%09red
TGF-beta signaling pathway	KEGG PATHWAY	ssc04350	2	74	0.256575	0.858163	ENSSSCG00000008645|ENSSSCG00000015842	ssc:654298|ssc:397656|	654298|397656|	ID2|PPP2CA|	http://www.genome.jp/kegg-bin/show_pathway?ssc04350/ssc:397656%09red/ssc:654298%09red
Histidine metabolism	KEGG PATHWAY	ssc00340	1	22	0.258036	0.858163	ENSSSCG00000018044	ssc:100526075|	100526075|	ALDH3A1|	http://www.genome.jp/kegg-bin/show_pathway?ssc00340/ssc:100526075%09red
alpha-Linolenic acid metabolism	KEGG PATHWAY	ssc00592	1	22	0.258036	0.858163	ENSSSCG00000009139	ssc:100517106|	100517106|	PLA2G12A|	http://www.genome.jp/kegg-bin/show_pathway?ssc00592/ssc:100517106%09red
Ascorbate and aldarate metabolism	KEGG PATHWAY	ssc00053	1	22	0.258036	0.858163	ENSSSCG00000030150	ssc:100627727|	100627727|	UGDH|	http://www.genome.jp/kegg-bin/show_pathway?ssc00053/ssc:100627727%09red
Maturity onset diabetes of the young	KEGG PATHWAY	ssc04950	1	23	0.267607	0.858163	ENSSSCG00000026362	ssc:100499567|	100499567|	HES1|	http://www.genome.jp/kegg-bin/show_pathway?ssc04950/ssc:100499567%09red
Butanoate metabolism	KEGG PATHWAY	ssc00650	1	23	0.267607	0.858163	ENSSSCG00000016872	ssc:100524223|	100524223|	HMGCS1|	http://www.genome.jp/kegg-bin/show_pathway?ssc00650/ssc:100524223%09red
Hippo signaling pathway	KEGG PATHWAY	ssc04390	3	138	0.273445	0.858163	ENSSSCG00000008952|ENSSSCG00000008645|ENSSSCG00000015842	ssc:100525351|ssc:654298|ssc:397656|	100525351|654298|397656|	RASSF6|ID2|PPP2CA|	http://www.genome.jp/kegg-bin/show_pathway?ssc04390/ssc:100525351%09red/ssc:397656%09red/ssc:654298%09red
Mismatch repair	KEGG PATHWAY	ssc03430	1	24	0.277054	0.858163	ENSSSCG00000008790	ssc:100511271|	100511271|	RFC1|	http://www.genome.jp/kegg-bin/show_pathway?ssc03430/ssc:100511271%09red
Ribosome	KEGG PATHWAY	ssc03010	3	143	0.290939	0.858163	ENSSSCG00000006008|ENSSSCG00000011856|ENSSSCG00000025192	ssc:100624157|ssc:100514796|ssc:100627537|	100624157|100514796|100627537|	RPS2E|RPL35A|RPL9|	http://www.genome.jp/kegg-bin/show_pathway?ssc03010/ssc:100627537%09red/ssc:100624157%09red/ssc:100514796%09red
Pentose and glucuronate interconversions	KEGG PATHWAY	ssc00040	1	26	0.295587	0.858163	ENSSSCG00000030150	ssc:100627727|	100627727|	UGDH|	http://www.genome.jp/kegg-bin/show_pathway?ssc00040/ssc:100627727%09red
Glycosylphosphatidylinositol(GPI)-anchor biosynthesis	KEGG PATHWAY	ssc00563	1	26	0.295587	0.858163	ENSSSCG00000005927	ssc:100525695|	100525695|	GPAA1|	http://www.genome.jp/kegg-bin/show_pathway?ssc00563/ssc:100525695%09red
Glycerophospholipid metabolism	KEGG PATHWAY	ssc00564	2	83	0.299542	0.858163	ENSSSCG00000012182|ENSSSCG00000009139	ssc:100152643|ssc:100517106|	100152643|100517106|	PCYT1B|PLA2G12A|	http://www.genome.jp/kegg-bin/show_pathway?ssc00564/ssc:100517106%09red/ssc:100152643%09red
mRNA surveillance pathway	KEGG PATHWAY	ssc03015	2	84	0.3043	0.858163	ENSSSCG00000007119|ENSSSCG00000015842	ssc:100514739|ssc:397656|	100514739|397656|	NXT1|PPP2CA|	http://www.genome.jp/kegg-bin/show_pathway?ssc03015/ssc:397656%09red/ssc:100514739%09red
Mucin type O-Glycan biosynthesis	KEGG PATHWAY	ssc00512	1	28	0.313645	0.858163	ENSSSCG00000005277	ssc:100157004|	100157004|	GCNT1|	http://www.genome.jp/kegg-bin/show_pathway?ssc00512/ssc:100157004%09red
beta-Alanine metabolism	KEGG PATHWAY	ssc00410	1	28	0.313645	0.858163	ENSSSCG00000018044	ssc:100526075|	100526075|	ALDH3A1|	http://www.genome.jp/kegg-bin/show_pathway?ssc00410/ssc:100526075%09red
Fructose and mannose metabolism	KEGG PATHWAY	ssc00051	1	29	0.322501	0.858163	ENSSSCG00000011133	ssc:100516289|	100516289|	|	http://www.genome.jp/kegg-bin/show_pathway?ssc00051/ssc:100516289%09red
Citrate cycle (TCA cycle)	KEGG PATHWAY	ssc00020	1	30	0.331243	0.858163	ENSSSCG00000030318	ssc:100524676|	100524676|	SDHC, CYBL|	http://www.genome.jp/kegg-bin/show_pathway?ssc00020/ssc:100524676%09red
Linoleic acid metabolism	KEGG PATHWAY	ssc00591	1	32	0.34839	0.858163	ENSSSCG00000009139	ssc:100517106|	100517106|	PLA2G12A|	http://www.genome.jp/kegg-bin/show_pathway?ssc00591/ssc:100517106%09red
Base excision repair	KEGG PATHWAY	ssc03410	1	32	0.34839	0.858163	ENSSSCG00000007982	ssc:100525334|	100525334|	MPG|	http://www.genome.jp/kegg-bin/show_pathway?ssc03410/ssc:100525334%09red
Nicotine addiction	KEGG PATHWAY	ssc05033	1	33	0.356799	0.858163	ENSSSCG00000013754	ssc:100525387|	100525387|	CACNA1A|	http://www.genome.jp/kegg-bin/show_pathway?ssc05033/ssc:100525387%09red
Taste transduction	KEGG PATHWAY	ssc04742	1	33	0.356799	0.858163	ENSSSCG00000013754	ssc:100525387|	100525387|	CACNA1A|	http://www.genome.jp/kegg-bin/show_pathway?ssc04742/ssc:100525387%09red
Tyrosine metabolism	KEGG PATHWAY	ssc00350	1	33	0.356799	0.858163	ENSSSCG00000018044	ssc:100526075|	100526075|	ALDH3A1|	http://www.genome.jp/kegg-bin/show_pathway?ssc00350/ssc:100526075%09red
RNA polymerase	KEGG PATHWAY	ssc03020	1	34	0.3651	0.858163	ENSSSCG00000007970	ssc:100521261|	100521261|	POLR3K|	http://www.genome.jp/kegg-bin/show_pathway?ssc03020/ssc:100521261%09red
Fat digestion and absorption	KEGG PATHWAY	ssc04975	1	34	0.3651	0.858163	ENSSSCG00000009139	ssc:100517106|	100517106|	PLA2G12A|	http://www.genome.jp/kegg-bin/show_pathway?ssc04975/ssc:100517106%09red
DNA replication	KEGG PATHWAY	ssc03030	1	35	0.373294	0.858163	ENSSSCG00000008790	ssc:100511271|	100511271|	RFC1|	http://www.genome.jp/kegg-bin/show_pathway?ssc03030/ssc:100511271%09red
Bladder cancer	KEGG PATHWAY	ssc05219	1	35	0.373294	0.858163	ENSSSCG00000009134	ssc:397083|	397083|	EGF|	http://www.genome.jp/kegg-bin/show_pathway?ssc05219/ssc:397083%09red
SNARE interactions in vesicular transport	KEGG PATHWAY	ssc04130	1	36	0.381382	0.858163	ENSSSCG00000013752	ssc:100627609|	100627609|	STX10|	http://www.genome.jp/kegg-bin/show_pathway?ssc04130/ssc:100627609%09red
Regulation of autophagy	KEGG PATHWAY	ssc04140	1	38	0.397248	0.858163	ENSSSCG00000018045	ssc:100525780|	100525780|	ULK2|	http://www.genome.jp/kegg-bin/show_pathway?ssc04140/ssc:100525780%09red
Allograft rejection	KEGG PATHWAY	ssc05330	1	38	0.397248	0.858163	ENSSSCG00000017044	ssc:397076|	397076|	IL12B|	http://www.genome.jp/kegg-bin/show_pathway?ssc05330/ssc:397076%09red
Oocyte meiosis	KEGG PATHWAY	ssc04114	2	107	0.410981	0.858163	ENSSSCG00000004077|ENSSSCG00000015842	ssc:100514379|ssc:397656|	100514379|397656|	FBXO5|PPP2CA|	http://www.genome.jp/kegg-bin/show_pathway?ssc04114/ssc:397656%09red/ssc:100514379%09red
Type I diabetes mellitus	KEGG PATHWAY	ssc04940	1	42	0.427774	0.858163	ENSSSCG00000017044	ssc:397076|	397076|	IL12B|	http://www.genome.jp/kegg-bin/show_pathway?ssc04940/ssc:397076%09red
Thyroid hormone signaling pathway	KEGG PATHWAY	ssc04919	2	113	0.437554	0.858163	ENSSSCG00000016058|ENSSSCG00000016057	ssc:396655|ssc:396655|	396655|396655|	STAT1|STAT1|	http://www.genome.jp/kegg-bin/show_pathway?ssc04919/ssc:396655%09red
Notch signaling pathway	KEGG PATHWAY	ssc04330	1	44	0.442454	0.858163	ENSSSCG00000026362	ssc:100499567|	100499567|	HES1|	http://www.genome.jp/kegg-bin/show_pathway?ssc04330/ssc:100499567%09red
Intestinal immune network for IgA production	KEGG PATHWAY	ssc04672	1	44	0.442454	0.858163	ENSSSCG00000016871	ssc:554303|	554303|	CCL28, MEC|	http://www.genome.jp/kegg-bin/show_pathway?ssc04672/ssc:554303%09red
Cell cycle	KEGG PATHWAY	ssc04110	2	115	0.446267	0.858163	ENSSSCG00000003876|ENSSSCG00000007151	ssc:100515210|ssc:100329127|	100515210|100329127|	|CDC25B|	http://www.genome.jp/kegg-bin/show_pathway?ssc04110/ssc:100515210%09red/ssc:100329127%09red
Valine, leucine and isoleucine degradation	KEGG PATHWAY	ssc00280	1	46	0.456758	0.858163	ENSSSCG00000016872	ssc:100524223|	100524223|	HMGCS1|	http://www.genome.jp/kegg-bin/show_pathway?ssc00280/ssc:100524223%09red
Leukocyte transendothelial migration	KEGG PATHWAY	ssc04670	2	119	0.463464	0.858163	ENSSSCG00000008794|ENSSSCG00000030344	ssc:100513215|ssc:100294682|	100513215|100294682|	RHOH|CLDN19|	http://www.genome.jp/kegg-bin/show_pathway?ssc04670/ssc:100294682%09red/ssc:100513215%09red
Staphylococcus aureus infection	KEGG PATHWAY	ssc05150	1	47	0.463773	0.858163	ENSSSCG00000009138	ssc:100516921|	100516921|	CFI|	http://www.genome.jp/kegg-bin/show_pathway?ssc05150/ssc:100516921%09red
Dopaminergic synapse	KEGG PATHWAY	ssc04728	2	120	0.467714	0.858163	ENSSSCG00000013754|ENSSSCG00000015842	ssc:100525387|ssc:397656|	100525387|397656|	CACNA1A|PPP2CA|	http://www.genome.jp/kegg-bin/show_pathway?ssc04728/ssc:397656%09red/ssc:100525387%09red
Type II diabetes mellitus	KEGG PATHWAY	ssc04930	1	48	0.470697	0.858163	ENSSSCG00000013754	ssc:100525387|	100525387|	CACNA1A|	http://www.genome.jp/kegg-bin/show_pathway?ssc04930/ssc:100525387%09red
Metabolism of xenobiotics by cytochrome P450	KEGG PATHWAY	ssc00980	1	49	0.477532	0.858163	ENSSSCG00000018044	ssc:100526075|	100526075|	ALDH3A1|	http://www.genome.jp/kegg-bin/show_pathway?ssc00980/ssc:100526075%09red
N-Glycan biosynthesis	KEGG PATHWAY	ssc00510	1	49	0.477532	0.858163	ENSSSCG00000011612	ssc:397606|	397606|	RPN1|	http://www.genome.jp/kegg-bin/show_pathway?ssc00510/ssc:397606%09red
Amino sugar and nucleotide sugar metabolism	KEGG PATHWAY	ssc00520	1	49	0.477532	0.858163	ENSSSCG00000030150	ssc:100627727|	100627727|	UGDH|	http://www.genome.jp/kegg-bin/show_pathway?ssc00520/ssc:100627727%09red
Drug metabolism - cytochrome P450	KEGG PATHWAY	ssc00982	1	49	0.477532	0.858163	ENSSSCG00000018044	ssc:100526075|	100526075|	ALDH3A1|	http://www.genome.jp/kegg-bin/show_pathway?ssc00982/ssc:100526075%09red
Endometrial cancer	KEGG PATHWAY	ssc05213	1	49	0.477532	0.858163	ENSSSCG00000009134	ssc:397083|	397083|	EGF|	http://www.genome.jp/kegg-bin/show_pathway?ssc05213/ssc:397083%09red
Fanconi anemia pathway	KEGG PATHWAY	ssc03460	1	51	0.49094	0.858163	ENSSSCG00000026362	ssc:100499567|	100499567|	HES1|	http://www.genome.jp/kegg-bin/show_pathway?ssc03460/ssc:100499567%09red
Non-small cell lung cancer	KEGG PATHWAY	ssc05223	1	52	0.497514	0.858163	ENSSSCG00000009134	ssc:397083|	397083|	EGF|	http://www.genome.jp/kegg-bin/show_pathway?ssc05223/ssc:397083%09red
Tight junction	KEGG PATHWAY	ssc04530	2	129	0.505044	0.858163	ENSSSCG00000030344|ENSSSCG00000015842	ssc:100294682|ssc:397656|	100294682|397656|	CLDN19|PPP2CA|	http://www.genome.jp/kegg-bin/show_pathway?ssc04530/ssc:397656%09red/ssc:100294682%09red
Endocytosis	KEGG PATHWAY	ssc04144	3	206	0.50658	0.858163	ENSSSCG00000009134|ENSSSCG00000017140|ENSSSCG00000013017	ssc:397083|ssc:100512857|ssc:100516416|	397083|100512857|100516416|	EGF|CHMP6|EHD1|	http://www.genome.jp/kegg-bin/show_pathway?ssc04144/ssc:397083%09red/ssc:100512857%09red/ssc:100516416%09red
Glycolysis / Gluconeogenesis	KEGG PATHWAY	ssc00010	1	54	0.510411	0.858163	ENSSSCG00000018044	ssc:100526075|	100526075|	ALDH3A1|	http://www.genome.jp/kegg-bin/show_pathway?ssc00010/ssc:100526075%09red
Malaria	KEGG PATHWAY	ssc05144	1	54	0.510411	0.858163	ENSSSCG00000007978	ssc:100737768|	100737768|	|	http://www.genome.jp/kegg-bin/show_pathway?ssc05144/ssc:100737768%09red
Insulin signaling pathway	KEGG PATHWAY	ssc04910	2	133	0.521084	0.866585	ENSSSCG00000013022|ENSSSCG00000017139	ssc:733659|ssc:100512677|	733659|100512677|	PYGM| |	http://www.genome.jp/kegg-bin/show_pathway?ssc04910/ssc:100512677%09red/ssc:733659%09red
Synaptic vesicle cycle	KEGG PATHWAY	ssc04721	1	59	0.541226	0.873132	ENSSSCG00000013754	ssc:100525387|	100525387|	CACNA1A|	http://www.genome.jp/kegg-bin/show_pathway?ssc04721/ssc:100525387%09red
Chemical carcinogenesis	KEGG PATHWAY	ssc05204	1	60	0.547154	0.873132	ENSSSCG00000018044	ssc:100526075|	100526075|	ALDH3A1|	http://www.genome.jp/kegg-bin/show_pathway?ssc05204/ssc:100526075%09red
Adrenergic signaling in cardiomyocytes	KEGG PATHWAY	ssc04261	2	141	0.552106	0.873132	ENSSSCG00000015842|ENSSSCG00000023267	ssc:397656|ssc:100736963|	397656|100736963|	PPP2CA|SCN1B|	http://www.genome.jp/kegg-bin/show_pathway?ssc04261/ssc:397656%09red/ssc:100736963%09red
Glioma	KEGG PATHWAY	ssc05214	1	61	0.553004	0.873132	ENSSSCG00000009134	ssc:397083|	397083|	EGF|	http://www.genome.jp/kegg-bin/show_pathway?ssc05214/ssc:397083%09red
Arachidonic acid metabolism	KEGG PATHWAY	ssc00590	1	62	0.55878	0.873132	ENSSSCG00000009139	ssc:100517106|	100517106|	PLA2G12A|	http://www.genome.jp/kegg-bin/show_pathway?ssc00590/ssc:100517106%09red
Ras signaling pathway	KEGG PATHWAY	ssc04014	3	223	0.559261	0.873132	ENSSSCG00000009134|ENSSSCG00000009139|ENSSSCG00000013023	ssc:397083|ssc:100517106|ssc:100626093|	397083|100517106|100626093|	EGF|PLA2G12A|RASGRP2|	http://www.genome.jp/kegg-bin/show_pathway?ssc04014/ssc:397083%09red/ssc:100517106%09red/ssc:100626093%09red
Legionellosis	KEGG PATHWAY	ssc05134	1	64	0.570109	0.878374	ENSSSCG00000017044	ssc:397076|	397076|	IL12B|	http://www.genome.jp/kegg-bin/show_pathway?ssc05134/ssc:397076%09red
MicroRNAs in cancer	KEGG PATHWAY	ssc05206	3	228	0.574101	0.878374	ENSSSCG00000007151|ENSSSCG00000026547|ENSSSCG00000017139	ssc:100329127|ssc:100626235|ssc:100512677|	100329127|100626235|100512677|	CDC25B|SLC45A3| |	http://www.genome.jp/kegg-bin/show_pathway?ssc05206/ssc:100512677%09red/ssc:100626235%09red/ssc:100329127%09red
Aminoacyl-tRNA biosynthesis	KEGG PATHWAY	ssc00970	1	68	0.591904	0.883118	ENSSSCG00000013745	ssc:100524304|	100524304|	FARSA|	http://www.genome.jp/kegg-bin/show_pathway?ssc00970/ssc:100524304%09red
Melanoma	KEGG PATHWAY	ssc05218	1	69	0.597178	0.883118	ENSSSCG00000009134	ssc:397083|	397083|	EGF|	http://www.genome.jp/kegg-bin/show_pathway?ssc05218/ssc:397083%09red
Pathways in cancer	KEGG PATHWAY	ssc05200	4	319	0.600498	0.883118	ENSSSCG00000009134|ENSSSCG00000016058|ENSSSCG00000016057|ENSSSCG00000030888	ssc:397083|ssc:396655|ssc:396655|ssc:595129|	397083|396655|396655|595129|	EGF|STAT1|STAT1|FADD, TNFRSF6|	http://www.genome.jp/kegg-bin/show_pathway?ssc05200/ssc:595129%09red/ssc:396655%09red/ssc:397083%09red
Adherens junction	KEGG PATHWAY	ssc04520	1	71	0.607524	0.883118	ENSSSCG00000017142	ssc:100513228|	100513228|	BAIAP2|	http://www.genome.jp/kegg-bin/show_pathway?ssc04520/ssc:100513228%09red
Thyroid hormone synthesis	KEGG PATHWAY	ssc04918	1	72	0.612598	0.883118	ENSSSCG00000015844	ssc:396625|	396625|	GSR|	http://www.genome.jp/kegg-bin/show_pathway?ssc04918/ssc:396625%09red
Complement and coagulation cascades	KEGG PATHWAY	ssc04610	1	73	0.617605	0.883118	ENSSSCG00000009138	ssc:100516921|	100516921|	CFI|	http://www.genome.jp/kegg-bin/show_pathway?ssc04610/ssc:100516921%09red
Pertussis	KEGG PATHWAY	ssc05133	1	73	0.617605	0.883118	ENSSSCG00000017044	ssc:397076|	397076|	IL12B|	http://www.genome.jp/kegg-bin/show_pathway?ssc05133/ssc:397076%09red
HTLV-I infection	KEGG PATHWAY	ssc05166	3	253	0.64348	0.895245	ENSSSCG00000003876|ENSSSCG00000025182|ENSSSCG00000013746	ssc:100515210|ssc:100626141|ssc:100381266|	100515210|100626141|100381266|	|ELK4|CALR, CRP55, Calregulin, ERp60, HACBP|	http://www.genome.jp/kegg-bin/show_pathway?ssc05166/ssc:100515210%09red/ssc:100626141%09red/ssc:100381266%09red
Salmonella infection	KEGG PATHWAY	ssc05132	1	81	0.655414	0.895245	ENSSSCG00000004156	ssc:100152238|	100152238|	IFNGR1|	http://www.genome.jp/kegg-bin/show_pathway?ssc05132/ssc:100152238%09red
Alzheimer's disease	KEGG PATHWAY	ssc05010	2	175	0.66778	0.895245	ENSSSCG00000030318|ENSSSCG00000030888	ssc:100524676|ssc:595129|	100524676|595129|	SDHC, CYBL|FADD, TNFRSF6|	http://www.genome.jp/kegg-bin/show_pathway?ssc05010/ssc:595129%09red/ssc:100524676%09red
Progesterone-mediated oocyte maturation	KEGG PATHWAY	ssc04914	1	85	0.672897	0.895245	ENSSSCG00000007151	ssc:100329127|	100329127|	CDC25B|	http://www.genome.jp/kegg-bin/show_pathway?ssc04914/ssc:100329127%09red
Prostate cancer	KEGG PATHWAY	ssc05215	1	85	0.672897	0.895245	ENSSSCG00000009134	ssc:397083|	397083|	EGF|	http://www.genome.jp/kegg-bin/show_pathway?ssc05215/ssc:397083%09red
GABAergic synapse	KEGG PATHWAY	ssc04727	1	85	0.672897	0.895245	ENSSSCG00000013754	ssc:100525387|	100525387|	CACNA1A|	http://www.genome.jp/kegg-bin/show_pathway?ssc04727/ssc:100525387%09red
Hematopoietic cell lineage	KEGG PATHWAY	ssc04640	1	85	0.672897	0.895245	ENSSSCG00000007973	ssc:100521616|	100521616|	IL9R|	http://www.genome.jp/kegg-bin/show_pathway?ssc04640/ssc:100521616%09red
ErbB signaling pathway	KEGG PATHWAY	ssc04012	1	85	0.672897	0.895245	ENSSSCG00000009134	ssc:397083|	397083|	EGF|	http://www.genome.jp/kegg-bin/show_pathway?ssc04012/ssc:397083%09red
Pancreatic secretion	KEGG PATHWAY	ssc04972	1	87	0.681303	0.896756	ENSSSCG00000009139	ssc:100517106|	100517106|	PLA2G12A|	http://www.genome.jp/kegg-bin/show_pathway?ssc04972/ssc:100517106%09red
Gap junction	KEGG PATHWAY	ssc04540	1	90	0.693512	0.896756	ENSSSCG00000009134	ssc:397083|	397083|	EGF|	http://www.genome.jp/kegg-bin/show_pathway?ssc04540/ssc:397083%09red
Morphine addiction	KEGG PATHWAY	ssc05032	1	90	0.693512	0.896756	ENSSSCG00000013754	ssc:100525387|	100525387|	CACNA1A|	http://www.genome.jp/kegg-bin/show_pathway?ssc05032/ssc:100525387%09red
Apoptosis	KEGG PATHWAY	ssc04210	1	91	0.697477	0.896756	ENSSSCG00000030888	ssc:595129|	595129|	FADD, TNFRSF6|	http://www.genome.jp/kegg-bin/show_pathway?ssc04210/ssc:595129%09red
Retrograde endocannabinoid signaling	KEGG PATHWAY	ssc04723	1	95	0.712832	0.90196	ENSSSCG00000013754	ssc:100525387|	100525387|	CACNA1A|	http://www.genome.jp/kegg-bin/show_pathway?ssc04723/ssc:100525387%09red
Carbon metabolism	KEGG PATHWAY	ssc01200	1	99	0.72741	0.90196	ENSSSCG00000030318	ssc:100524676|	100524676|	SDHC, CYBL|	http://www.genome.jp/kegg-bin/show_pathway?ssc01200/ssc:100524676%09red
Regulation of actin cytoskeleton	KEGG PATHWAY	ssc04810	2	198	0.731519	0.90196	ENSSSCG00000017142|ENSSSCG00000009134	ssc:100513228|ssc:397083|	100513228|397083|	BAIAP2|EGF|	http://www.genome.jp/kegg-bin/show_pathway?ssc04810/ssc:100513228%09red/ssc:397083%09red
Pyrimidine metabolism	KEGG PATHWAY	ssc00240	1	101	0.73442	0.90196	ENSSSCG00000007970	ssc:100521261|	100521261|	POLR3K|	http://www.genome.jp/kegg-bin/show_pathway?ssc00240/ssc:100521261%09red
Amoebiasis	KEGG PATHWAY	ssc05146	1	107	0.754391	0.90196	ENSSSCG00000017044	ssc:397076|	397076|	IL12B|	http://www.genome.jp/kegg-bin/show_pathway?ssc05146/ssc:397076%09red
Rap1 signaling pathway	KEGG PATHWAY	ssc04015	2	208	0.755834	0.90196	ENSSSCG00000009134|ENSSSCG00000013023	ssc:397083|ssc:100626093|	397083|100626093|	EGF|RASGRP2|	http://www.genome.jp/kegg-bin/show_pathway?ssc04015/ssc:397083%09red/ssc:100626093%09red
Metabolic pathways	KEGG PATHWAY	ssc01100	13	1166	0.756313	0.90196	ENSSSCG00000029385|ENSSSCG00000011612|ENSSSCG00000005276|ENSSSCG00000005277|ENSSSCG00000013022|ENSSSCG00000012182|ENSSSCG00000009139|ENSSSCG00000030150|ENSSSCG00000030318|ENSSSCG00000018044|ENSSSCG00000005927|ENSSSCG00000016872|ENSSSCG00000007970	ssc:100627627|ssc:397606|ssc:100520822|ssc:100157004|ssc:733659|ssc:100152643|ssc:100517106|ssc:100627727|ssc:100524676|ssc:100526075|ssc:100525695|ssc:100524223|ssc:100521261|	100627627|397606|100520822|100157004|733659|100152643|100517106|100627727|100524676|100526075|100525695|100524223|100521261|	LIAS|RPN1|RFK|GCNT1|PYGM|PCYT1B|PLA2G12A|UGDH|SDHC, CYBL|ALDH3A1|GPAA1|HMGCS1|POLR3K|	http://www.genome.jp/kegg-bin/show_pathway?ssc01100/ssc:397606%09red/ssc:100524676%09red/ssc:733659%09red/ssc:100157004%09red/ssc:100525695%09red/ssc:100517106%09red/ssc:100526075%09red/ssc:100152643%09red/ssc:100521261%09red/ssc:100627627%09red/ssc:100520822%09red/ssc:100627727%09red/ssc:100524223%09red
Natural killer cell mediated cytotoxicity	KEGG PATHWAY	ssc04650	1	108	0.75757	0.90196	ENSSSCG00000004156	ssc:100152238|	100152238|	IFNGR1|	http://www.genome.jp/kegg-bin/show_pathway?ssc04650/ssc:100152238%09red
TNF signaling pathway	KEGG PATHWAY	ssc04668	1	109	0.760709	0.90196	ENSSSCG00000030888	ssc:595129|	595129|	FADD, TNFRSF6|	http://www.genome.jp/kegg-bin/show_pathway?ssc04668/ssc:595129%09red
Serotonergic synapse	KEGG PATHWAY	ssc04726	1	112	0.769884	0.90196	ENSSSCG00000013754	ssc:100525387|	100525387|	CACNA1A|	http://www.genome.jp/kegg-bin/show_pathway?ssc04726/ssc:100525387%09red
Cholinergic synapse	KEGG PATHWAY	ssc04725	1	113	0.772864	0.90196	ENSSSCG00000013754	ssc:100525387|	100525387|	CACNA1A|	http://www.genome.jp/kegg-bin/show_pathway?ssc04725/ssc:100525387%09red
Lysosome	KEGG PATHWAY	ssc04142	1	115	0.778709	0.90196	ENSSSCG00000004486	ssc:100516051|	100516051|	SLC17A5|	http://www.genome.jp/kegg-bin/show_pathway?ssc04142/ssc:100516051%09red
Vascular smooth muscle contraction	KEGG PATHWAY	ssc04270	1	117	0.784403	0.90196	ENSSSCG00000009139	ssc:100517106|	100517106|	PLA2G12A|	http://www.genome.jp/kegg-bin/show_pathway?ssc04270/ssc:100517106%09red
Neurotrophin signaling pathway	KEGG PATHWAY	ssc04722	1	118	0.787196	0.90196	ENSSSCG00000008644	ssc:100514284|	100514284|	KIDINS220|	http://www.genome.jp/kegg-bin/show_pathway?ssc04722/ssc:100514284%09red
Axon guidance	KEGG PATHWAY	ssc04360	1	119	0.789952	0.90196	ENSSSCG00000014224	ssc:100522008|	100522008|	SEMA6A|	http://www.genome.jp/kegg-bin/show_pathway?ssc04360/ssc:100522008%09red
Glutamatergic synapse	KEGG PATHWAY	ssc04724	1	123	0.800626	0.902466	ENSSSCG00000013754	ssc:100525387|	100525387|	CACNA1A|	http://www.genome.jp/kegg-bin/show_pathway?ssc04724/ssc:100525387%09red
PI3K-Akt signaling pathway	KEGG PATHWAY	ssc04151	3	328	0.802192	0.902466	ENSSSCG00000009134|ENSSSCG00000015842|ENSSSCG00000017139	ssc:397083|ssc:397656|ssc:100512677|	397083|397656|100512677|	EGF|PPP2CA| |	http://www.genome.jp/kegg-bin/show_pathway?ssc04151/ssc:397656%09red/ssc:100512677%09red/ssc:397083%09red
Signaling pathways regulating pluripotency of stem cells	KEGG PATHWAY	ssc04550	1	132	0.822707	0.904091	ENSSSCG00000008645	ssc:654298|	654298|	ID2|	http://www.genome.jp/kegg-bin/show_pathway?ssc04550/ssc:654298%09red
Platelet activation	KEGG PATHWAY	ssc04611	1	132	0.822707	0.904091	ENSSSCG00000013023	ssc:100626093|	100626093|	RASGRP2|	http://www.genome.jp/kegg-bin/show_pathway?ssc04611/ssc:100626093%09red
FoxO signaling pathway	KEGG PATHWAY	ssc04068	1	133	0.825005	0.904091	ENSSSCG00000009134	ssc:397083|	397083|	EGF|	http://www.genome.jp/kegg-bin/show_pathway?ssc04068/ssc:397083%09red
Oxidative phosphorylation	KEGG PATHWAY	ssc00190	1	134	0.827273	0.904091	ENSSSCG00000030318	ssc:100524676|	100524676|	SDHC, CYBL|	http://www.genome.jp/kegg-bin/show_pathway?ssc00190/ssc:100524676%09red
Phagosome	KEGG PATHWAY	ssc04145	1	147	0.854224	0.919234	ENSSSCG00000013746	ssc:100381266|	100381266|	CALR, CRP55, Calregulin, ERp60, HACBP|	http://www.genome.jp/kegg-bin/show_pathway?ssc04145/ssc:100381266%09red
RNA transport	KEGG PATHWAY	ssc03013	1	149	0.857981	0.919234	ENSSSCG00000007119	ssc:100514739|	100514739|	NXT1|	http://www.genome.jp/kegg-bin/show_pathway?ssc03013/ssc:100514739%09red
Parkinson's disease	KEGG PATHWAY	ssc05012	1	151	0.861641	0.919234	ENSSSCG00000030318	ssc:100524676|	100524676|	SDHC, CYBL|	http://www.genome.jp/kegg-bin/show_pathway?ssc05012/ssc:100524676%09red
Neuroactive ligand-receptor interaction	KEGG PATHWAY	ssc04080	2	268	0.865161	0.919234	ENSSSCG00000016277|ENSSSCG00000024428	ssc:100520336|ssc:100513414|	100520336|100513414|	NMUR1|CHRNA9|	http://www.genome.jp/kegg-bin/show_pathway?ssc04080/ssc:100520336%09red/ssc:100513414%09red
Non-alcoholic fatty liver disease (NAFLD)	KEGG PATHWAY	ssc04932	1	160	0.876982	0.925367	ENSSSCG00000030318	ssc:100524676|	100524676|	SDHC, CYBL|	http://www.genome.jp/kegg-bin/show_pathway?ssc04932/ssc:100524676%09red
Calcium signaling pathway	KEGG PATHWAY	ssc04020	1	182	0.907716	0.933319	ENSSSCG00000013754	ssc:100525387|	100525387|	CACNA1A|	http://www.genome.jp/kegg-bin/show_pathway?ssc04020/ssc:100525387%09red
Purine metabolism	KEGG PATHWAY	ssc00230	1	183	0.908915	0.933319	ENSSSCG00000007970	ssc:100521261|	100521261|	POLR3K|	http://www.genome.jp/kegg-bin/show_pathway?ssc00230/ssc:100521261%09red
Epstein-Barr virus infection	KEGG PATHWAY	ssc05169	1	189	0.915788	0.933319	ENSSSCG00000007970	ssc:100521261|	100521261|	POLR3K|	http://www.genome.jp/kegg-bin/show_pathway?ssc05169/ssc:100521261%09red
Huntington's disease	KEGG PATHWAY	ssc05016	1	190	0.916882	0.933319	ENSSSCG00000030318	ssc:100524676|	100524676|	SDHC, CYBL|	http://www.genome.jp/kegg-bin/show_pathway?ssc05016/ssc:100524676%09red
Proteoglycans in cancer	KEGG PATHWAY	ssc05205	1	192	0.919028	0.933319	ENSSSCG00000017044	ssc:397076|	397076|	IL12B|	http://www.genome.jp/kegg-bin/show_pathway?ssc05205/ssc:397076%09red
Focal adhesion	KEGG PATHWAY	ssc04510	1	194	0.921118	0.933319	ENSSSCG00000009134	ssc:397083|	397083|	EGF|	http://www.genome.jp/kegg-bin/show_pathway?ssc04510/ssc:397083%09red
cAMP signaling pathway	KEGG PATHWAY	ssc04024	1	201	0.928021	0.934126	ENSSSCG00000021374	ssc:100623939|	100623939|	|	http://www.genome.jp/kegg-bin/show_pathway?ssc04024/ssc:100623939%09red
Olfactory transduction	KEGG PATHWAY	ssc04740	2	810	0.999735	0.999735	ENSSSCG00000020949|ENSSSCG00000028874	ssc:100736731|ssc:100736731|	100736731|100736731|	| |	http://www.genome.jp/kegg-bin/show_pathway?ssc04740/ssc:100736731%09red
--------------------
#Term	Database	ID	Input number	Background number	P-Value	Corrected P-Value	Input	KO	Entrez_ID	KO_name	Hyperlink
--------------------
#Term	Database	ID	Input number	Background number	P-Value	Corrected P-Value	Input	KO	Entrez_ID	KO_name	Hyperlink
--------------------
