# Supplementary material for: The long non-coding RNA LNC_000397 negatively regulates PRRSV replication through induction of interferon-stimulated genes
Source: Virol J. 2022 Mar 5;19:40. doi: 10.1186/s12985-022-01761-x (PMC8897765; doi:10.1186/s12985-022-01761-x)
Supplement: Supplementary file 7 — Additional file 7: Table S6 Lists KEGG pathway enrichment of mRNAs co-expressed with differently expressed lncRNAs in GSWW and VR2332 infected groups. [file 12985_2022_1761_MOESM7_ESM.xlsx]

## Sheet: GSWW Up
##Databases: KEGG PATHWAY
##Statistical test method: hypergeometric test / Fisher's exact test
##FDR correction method: Benjamini and Hochberg
#Term	Database	ID	Input number	Background number	P-Value	Corrected P-Value	Input	KO	Entrez_ID	KO_name	Hyperlink
Influenza A	KEGG PATHWAY	ssc05164	24	168	4.03922e-05	0.00557117	ENSSSCG00000000396|ENSSSCG00000015801|ENSSSCG00000001912|ENSSSCG00000008648|ENSSSCG00000000068|ENSSSCG00000008977|ENSSSCG00000028355|ENSSSCG00000008090|ENSSSCG00000030408|ENSSSCG00000020906|ENSSSCG00000009637|ENSSSCG00000008208|ENSSSCG00000003395|ENSSSCG00000028711|ENSSSCG00000029475|ENSSSCG00000011251|ENSSSCG00000001404|ENSSSCG00000012981|ENSSSCG00000006543|ENSSSCG00000007585|ENSSSCG00000001952|…	ssc:396923|ssc:100037937|ssc:100157336|ssc:396752|ssc:100156226|ssc:494019|ssc:397653|ssc:397094|ssc:396723|ssc:406191|ssc:100624226|ssc:100513348|ssc:100518131|ssc:397319|ssc:100622285|ssc:396646|ssc:397086|ssc:100135665|ssc:100523784|ssc:414396|ssc:406188|ssc:100523731|ssc:595128|ssc:396655|	396923|100037937|100157336|396752|100156226|494019|397653|397094|396723|406191|100624226|100513348|100518131|397319|100622285|396646|397086|100135665|100523784|414396|406188|100523731|595128|396655|	STAT2|TLR3, TLR-3|PML|RSAD2, CIG6, IRG6|EP300|CXCL10|ACTB|IL1A, IL-1alpha|DDX58, RHIV-1, RIG-1, RIG-I, RLR-1|TNFSF10, TRAIL| |EIF2AK3|PIK3CD|CASP1| |MYD88|TNF, TNFa|RELA|ADAR|ACTB|NFKBIA, ECI-6/IKBA, IKBA| |OAS2|STAT1|	http://www.genome.jp/kegg-bin/show_pathway?ssc05164/ssc:414396%09red/ssc:100037937%09red/ssc:397094%09red/ssc:100156226%09red/ssc:406191%09red/ssc:397653%09red/ssc:397086%09red/ssc:595128%09red/ssc:100523784%09red/ssc:396723%09red/ssc:100513348%09red/ssc:397319%09red/ssc:396646%09red/ssc:100622285%09red/ssc:100523731%09red/ssc:494019%09red/ssc:100157336%09red/ssc:100135665%09red/ssc:396923%09red/…
Herpes simplex infection	KEGG PATHWAY	ssc05168	25	182	5.01907e-05	0.00557117	ENSSSCG00000000396|ENSSSCG00000015801|ENSSSCG00000001341|ENSSSCG00000009881|ENSSSCG00000000068|ENSSSCG00000028278|ENSSSCG00000001414|ENSSSCG00000030408|ENSSSCG00000016263|ENSSSCG00000002525|ENSSSCG00000024694|ENSSSCG00000017626|ENSSSCG00000020893|ENSSSCG00000008208|ENSSSCG00000025181|ENSSSCG00000011251|ENSSSCG00000001404|ENSSSCG00000001509|ENSSSCG00000012981|ENSSSCG00000010453|ENSSSCG00000001912|…	ssc:396923|ssc:100037937|ssc:100135031|ssc:595128|ssc:100156226|ssc:100737040|ssc:397211|ssc:396723|ssc:100516940|ssc:100156979|ssc:100626452|ssc:654327|ssc:733649|ssc:100513348|ssc:100523731|ssc:396646|ssc:397086|ssc:100524813|ssc:100135665|ssc:100153038|ssc:100157336|ssc:100156182|ssc:406188|ssc:733650|ssc:396655|	396923|100037937|100135031|595128|100156226|100737040|397211|396723|100516940|100156979|100626452|654327|733649|100513348|100523731|396646|397086|100524813|100135665|100153038|100157336|100156182|406188|733650|396655|	STAT2|TLR3, TLR-3|SLA-2, SLA-B|OAS2|EP300|POLR2A|CSNK2B, CK2N, CKII_beta|DDX58, RHIV-1, RIG-1, RIG-I, RLR-1|SP100|TRAF3, TRAF3_TV1|TAF4|SRSF1, SFRS1|TAP1|EIF2AK3| |MYD88|TNF, TNFa|DAXX|RELA|IFIT1|PML|TAB2|NFKBIA, ECI-6/IKBA, IKBA|TAP2|STAT1|	http://www.genome.jp/kegg-bin/show_pathway?ssc05168/ssc:100737040%09red/ssc:100153038%09red/ssc:100037937%09red/ssc:100626452%09red/ssc:100156226%09red/ssc:595128%09red/ssc:100524813%09red/ssc:733649%09red/ssc:396723%09red/ssc:100513348%09red/ssc:100523731%09red/ssc:396646%09red/ssc:100156182%09red/ssc:100157336%09red/ssc:100156979%09red/ssc:397086%09red/ssc:654327%09red/ssc:100135665%09red/ssc:3…
Hepatitis C	KEGG PATHWAY	ssc05160	18	127	0.0003872	0.0286528	ENSSSCG00000030900|ENSSSCG00000008208|ENSSSCG00000003395|ENSSSCG00000025181|ENSSSCG00000000396|ENSSSCG00000002525|ENSSSCG00000010453|ENSSSCG00000015801|ENSSSCG00000030408|ENSSSCG00000009881|ENSSSCG00000001952|ENSSSCG00000009657|ENSSSCG00000008478|ENSSSCG00000012981|ENSSSCG00000001404|ENSSSCG00000017403|ENSSSCG00000028512|ENSSSCG00000016057	ssc:396801|ssc:100513348|ssc:100518131|ssc:100523731|ssc:396923|ssc:100156979|ssc:100153038|ssc:100037937|ssc:396723|ssc:595128|ssc:406188|ssc:397090|ssc:100520187|ssc:100135665|ssc:397086|ssc:733648|ssc:396801|ssc:396655|	396801|100513348|100518131|100523731|396923|100156979|100153038|100037937|396723|595128|406188|397090|100520187|100135665|397086|733648|396801|396655|	LDLR|EIF2AK3|PIK3CD| |STAT2|TRAF3, TRAF3_TV1|IFIT1|TLR3, TLR-3|DDX58, RHIV-1, RIG-1, RIG-I, RLR-1|OAS2|NFKBIA, ECI-6/IKBA, IKBA|PPP2R2A| |RELA|TNF, TNFa|STAT3|LDLR|STAT1|	http://www.genome.jp/kegg-bin/show_pathway?ssc05160/ssc:396801%09red/ssc:100518131%09red/ssc:733648%09red/ssc:100153038%09red/ssc:100523731%09red/ssc:100520187%09red/ssc:100156979%09red/ssc:396723%09red/ssc:397086%09red/ssc:100513348%09red/ssc:397090%09red/ssc:100135665%09red/ssc:396923%09red/ssc:396655%09red/ssc:595128%09red/ssc:406188%09red/ssc:100037937%09red
Measles	KEGG PATHWAY	ssc05162	18	133	0.000632776	0.0351191	ENSSSCG00000008208|ENSSSCG00000008090|ENSSSCG00000006543|ENSSSCG00000000396|ENSSSCG00000012981|ENSSSCG00000004110|ENSSSCG00000020906|ENSSSCG00000003395|ENSSSCG00000030408|ENSSSCG00000009881|ENSSSCG00000001952|ENSSSCG00000029724|ENSSSCG00000025181|ENSSSCG00000017403|ENSSSCG00000011251|ENSSSCG00000009637|ENSSSCG00000001414|ENSSSCG00000016057	ssc:100513348|ssc:397094|ssc:100523784|ssc:396923|ssc:100135665|ssc:100156182|ssc:406191|ssc:100518131|ssc:396723|ssc:595128|ssc:406188|ssc:397605|ssc:100523731|ssc:733648|ssc:396646|ssc:100624226|ssc:397211|ssc:396655|	100513348|397094|100523784|396923|100135665|100156182|406191|100518131|396723|595128|406188|397605|100523731|733648|396646|100624226|397211|396655|	EIF2AK3|IL1A, IL-1alpha|ADAR|STAT2|RELA|TAB2|TNFSF10, TRAIL|PIK3CD|DDX58, RHIV-1, RIG-1, RIG-I, RLR-1|OAS2|NFKBIA, ECI-6/IKBA, IKBA|GNB2L1| |STAT3|MYD88| |CSNK2B, CK2N, CKII_beta|STAT1|	http://www.genome.jp/kegg-bin/show_pathway?ssc05162/ssc:100518131%09red/ssc:397605%09red/ssc:100523731%09red/ssc:733648%09red/ssc:397211%09red/ssc:100156182%09red/ssc:406188%09red/ssc:406191%09red/ssc:396723%09red/ssc:397094%09red/ssc:100513348%09red/ssc:100135665%09red/ssc:396646%09red/ssc:100624226%09red/ssc:396655%09red/ssc:595128%09red/ssc:100523784%09red/ssc:396923%09red
Cytosolic DNA-sensing pathway	KEGG PATHWAY	ssc04623	10	61	0.00291459	0.129408	ENSSSCG00000012981|ENSSSCG00000006543|ENSSSCG00000028711|ENSSSCG00000017698|ENSSSCG00000001952|ENSSSCG00000008977|ENSSSCG00000014349|ENSSSCG00000007508|ENSSSCG00000030408|ENSSSCG00000021383	ssc:100135665|ssc:100523784|ssc:397319|ssc:396668|ssc:406188|ssc:494019|ssc:100217389|ssc:100144524|ssc:396723|ssc:100516408|	100135665|100523784|397319|396668|406188|494019|100217389|100144524|396723|100516408|	RELA|ADAR|CASP1|CCL4, MIP-1BETA, MIP1b, SCY4A|NFKBIA, ECI-6/IKBA, IKBA|CXCL10|TMEM173, STING|ZBP1, DAI|DDX58, RHIV-1, RIG-1, RIG-I, RLR-1|MB21D1|	http://www.genome.jp/kegg-bin/show_pathway?ssc04623/ssc:396723%09red/ssc:100135665%09red/ssc:100523784%09red/ssc:100144524%09red/ssc:494019%09red/ssc:100516408%09red/ssc:396668%09red/ssc:397319%09red/ssc:100217389%09red/ssc:406188%09red
Acute myeloid leukemia	KEGG PATHWAY	ssc05221	9	54	0.00421636	0.14274	ENSSSCG00000010638|ENSSSCG00000012981|ENSSSCG00000003395|ENSSSCG00000008478|ENSSSCG00000012051|ENSSSCG00000017403|ENSSSCG00000003413|ENSSSCG00000005965|ENSSSCG00000001912	ssc:100153922|ssc:100135665|ssc:100518131|ssc:100520187|ssc:100512633|ssc:733648|ssc:100127359|ssc:448810|ssc:100157336|	100153922|100135665|100518131|100520187|100512633|733648|100127359|448810|100157336|	TCF7L2|RELA|PIK3CD| |RUNX1|STAT3|MTOR, FRAP1|MYC|PML|	http://www.genome.jp/kegg-bin/show_pathway?ssc05221/ssc:448810%09red/ssc:100518131%09red/ssc:733648%09red/ssc:100157336%09red/ssc:100135665%09red/ssc:100127359%09red/ssc:100512633%09red/ssc:100520187%09red/ssc:100153922%09red
Toll-like receptor signaling pathway	KEGG PATHWAY	ssc04620	13	101	0.00500009	0.14274	ENSSSCG00000012981|ENSSSCG00000003395|ENSSSCG00000002525|ENSSSCG00000015801|ENSSSCG00000016573|ENSSSCG00000017698|ENSSSCG00000004110|ENSSSCG00000001952|ENSSSCG00000001404|ENSSSCG00000011251|ENSSSCG00000008977|ENSSSCG00000016057|ENSSSCG00000012118	ssc:100135665|ssc:100518131|ssc:100156979|ssc:100037937|ssc:100515633|ssc:396668|ssc:100156182|ssc:406188|ssc:397086|ssc:396646|ssc:494019|ssc:396655|ssc:397384|	100135665|100518131|100156979|100037937|100515633|396668|100156182|406188|397086|396646|494019|396655|397384|	RELA|PIK3CD|TRAF3, TRAF3_TV1|TLR3, TLR-3|IRF5, IRF5_TV1|CCL4, MIP-1BETA, MIP1b, SCY4A|TAB2|NFKBIA, ECI-6/IKBA, IKBA|TNF, TNFa|MYD88|CXCL10|STAT1|TLR8|	http://www.genome.jp/kegg-bin/show_pathway?ssc04620/ssc:100518131%09red/ssc:397384%09red/ssc:100135665%09red/ssc:100156182%09red/ssc:397086%09red/ssc:100037937%09red/ssc:494019%09red/ssc:396668%09red/ssc:100515633%09red/ssc:396646%09red/ssc:396655%09red/ssc:406188%09red/ssc:100156979%09red
Apoptosis	KEGG PATHWAY	ssc04210	12	91	0.00577706	0.14274	ENSSSCG00000008090|ENSSSCG00000003395|ENSSSCG00000012981|ENSSSCG00000020906|ENSSSCG00000001952|ENSSSCG00000000769|ENSSSCG00000009637|ENSSSCG00000011251|ENSSSCG00000010301|ENSSSCG00000001404|ENSSSCG00000011363|ENSSSCG00000026940	ssc:397094|ssc:100518131|ssc:100135665|ssc:406191|ssc:406188|ssc:594852|ssc:100624226|ssc:396646|ssc:396603|ssc:397086|ssc:397493|ssc:100154896|	397094|100518131|100135665|406191|406188|594852|100624226|396646|396603|397086|397493|100154896|	IL1A, IL-1alpha|PIK3CD|RELA|TNFSF10, TRAIL|NFKBIA, ECI-6/IKBA, IKBA|BID| |MYD88|PPP3CB|TNF, TNFa|PRKAR2A|CASP10|	http://www.genome.jp/kegg-bin/show_pathway?ssc04210/ssc:100518131%09red/ssc:100154896%09red/ssc:594852%09red/ssc:406191%09red/ssc:396603%09red/ssc:397094%09red/ssc:100135665%09red/ssc:396646%09red/ssc:397086%09red/ssc:406188%09red/ssc:397493%09red/ssc:100624226%09red
RIG-I-like receptor signaling pathway	KEGG PATHWAY	ssc04622	10	68	0.00578677	0.14274	ENSSSCG00000012981|ENSSSCG00000002525|ENSSSCG00000017416|ENSSSCG00000001952|ENSSSCG00000029475|ENSSSCG00000008977|ENSSSCG00000014349|ENSSSCG00000001404|ENSSSCG00000030408|ENSSSCG00000026940	ssc:100135665|ssc:100156979|ssc:100524520|ssc:406188|ssc:100622285|ssc:494019|ssc:100217389|ssc:397086|ssc:396723|ssc:100154896|	100135665|100156979|100524520|406188|100622285|494019|100217389|397086|396723|100154896|	RELA|TRAF3, TRAF3_TV1|DHX58, LGP2|NFKBIA, ECI-6/IKBA, IKBA| |CXCL10|TMEM173, STING|TNF, TNFa|DDX58, RHIV-1, RIG-1, RIG-I, RLR-1|CASP10|	http://www.genome.jp/kegg-bin/show_pathway?ssc04622/ssc:100154896%09red/ssc:397086%09red/ssc:100622285%09red/ssc:396723%09red/ssc:494019%09red/ssc:100524520%09red/ssc:100135665%09red/ssc:100217389%09red/ssc:406188%09red/ssc:100156979%09red
Lysine degradation	KEGG PATHWAY	ssc00310	8	50	0.00842064	0.186938	ENSSSCG00000011332|ENSSSCG00000015820|ENSSSCG00000029082|ENSSSCG00000020663|ENSSSCG00000007782|ENSSSCG00000009806|ENSSSCG00000000191|ENSSSCG00000013457	ssc:100623101|ssc:100520868|ssc:100628131|ssc:100514805|ssc:100511747|ssc:100156137|ssc:100513150|ssc:100738665|	100623101|100520868|100628131|100514805|100511747|100156137|100513150|100738665|	SETD2|WHSC1L1|KMT2E, MLL5|KMT2C, MLL3|SETD1A|SETD1B|KMT2D|DOT1L|	http://www.genome.jp/kegg-bin/show_pathway?ssc00310/ssc:100511747%09red/ssc:100156137%09red/ssc:100520868%09red/ssc:100513150%09red/ssc:100738665%09red/ssc:100623101%09red/ssc:100514805%09red/ssc:100628131%09red
NF-kappa B signaling pathway	KEGG PATHWAY	ssc04064	11	90	0.0130417	0.263205	ENSSSCG00000030408|ENSSSCG00000012981|ENSSSCG00000002525|ENSSSCG00000017698|ENSSSCG00000004110|ENSSSCG00000001952|ENSSSCG00000029475|ENSSSCG00000011251|ENSSSCG00000001404|ENSSSCG00000001414|ENSSSCG00000006250	ssc:396723|ssc:100135665|ssc:100156979|ssc:396668|ssc:100156182|ssc:406188|ssc:100622285|ssc:396646|ssc:397086|ssc:397211|ssc:100152890|	396723|100135665|100156979|396668|100156182|406188|100622285|396646|397086|397211|100152890|	DDX58, RHIV-1, RIG-1, RIG-I, RLR-1|RELA|TRAF3, TRAF3_TV1|CCL4, MIP-1BETA, MIP1b, SCY4A|TAB2|NFKBIA, ECI-6/IKBA, IKBA| |MYD88|TNF, TNFa|CSNK2B, CK2N, CKII_beta|LYN|	http://www.genome.jp/kegg-bin/show_pathway?ssc04064/ssc:100152890%09red/ssc:397211%09red/ssc:100135665%09red/ssc:100156182%09red/ssc:100156979%09red/ssc:396723%09red/ssc:397086%09red/ssc:396668%09red/ssc:396646%09red/ssc:406188%09red/ssc:100622285%09red
Hepatitis B	KEGG PATHWAY	ssc05161	15	151	0.0212905	0.393875	ENSSSCG00000012981|ENSSSCG00000003395|ENSSSCG00000000396|ENSSSCG00000001952|ENSSSCG00000015801|ENSSSCG00000010224|ENSSSCG00000030408|ENSSSCG00000011251|ENSSSCG00000007026|ENSSSCG00000017403|ENSSSCG00000000068|ENSSSCG00000001404|ENSSSCG00000005965|ENSSSCG00000016057|ENSSSCG00000026940	ssc:100135665|ssc:100518131|ssc:396923|ssc:406188|ssc:100037937|ssc:100038004|ssc:396723|ssc:396646|ssc:397651|ssc:733648|ssc:100156226|ssc:397086|ssc:448810|ssc:396655|ssc:100154896|	100135665|100518131|396923|406188|100037937|100038004|396723|396646|397651|733648|100156226|397086|448810|396655|100154896|	RELA|PIK3CD|STAT2|NFKBIA, ECI-6/IKBA, IKBA|TLR3, TLR-3|EGR2|DDX58, RHIV-1, RIG-1, RIG-I, RLR-1|MYD88|VDAC1P5, VDAC3, VDAC5P|STAT3|EP300|TNF, TNFa|MYC|STAT1|CASP10|	http://www.genome.jp/kegg-bin/show_pathway?ssc05161/ssc:448810%09red/ssc:100518131%09red/ssc:100038004%09red/ssc:733648%09red/ssc:100135665%09red/ssc:100154896%09red/ssc:100037937%09red/ssc:396723%09red/ssc:397086%09red/ssc:100156226%09red/ssc:396923%09red/ssc:397651%09red/ssc:396655%09red/ssc:406188%09red/ssc:396646%09red
Thyroid hormone signaling pathway	KEGG PATHWAY	ssc04919	12	113	0.0244529	0.403554	ENSSSCG00000003395|ENSSSCG00000028355|ENSSSCG00000017414|ENSSSCG00000007585|ENSSSCG00000006740|ENSSSCG00000003413|ENSSSCG00000017505|ENSSSCG00000000068|ENSSSCG00000001880|ENSSSCG00000005965|ENSSSCG00000016057|ENSSSCG00000012396	ssc:100518131|ssc:397653|ssc:100524215|ssc:414396|ssc:397481|ssc:100127359|ssc:100513621|ssc:100156226|ssc:100621221|ssc:448810|ssc:396655|ssc:100157450|	100518131|397653|100524215|414396|397481|100127359|100513621|100156226|100621221|448810|396655|100157450|	PIK3CD|ACTB|KAT2A|ACTB|ATP1A1|MTOR, FRAP1|MED1|EP300|SIN3A|MYC|STAT1|MED12|	http://www.genome.jp/kegg-bin/show_pathway?ssc04919/ssc:448810%09red/ssc:100518131%09red/ssc:100513621%09red/ssc:414396%09red/ssc:100156226%09red/ssc:397653%09red/ssc:100127359%09red/ssc:396655%09red/ssc:100157450%09red/ssc:100621221%09red/ssc:100524215%09red/ssc:397481%09red
Leishmaniasis	KEGG PATHWAY	ssc05140	8	63	0.0264272	0.403554	ENSSSCG00000008090|ENSSSCG00000012981|ENSSSCG00000004110|ENSSSCG00000001952|ENSSSCG00000011251|ENSSSCG00000001404|ENSSSCG00000006678|ENSSSCG00000016057	ssc:397094|ssc:100135665|ssc:100156182|ssc:406188|ssc:396646|ssc:397086|ssc:613130|ssc:396655|	397094|100135665|100156182|406188|396646|397086|613130|396655|	IL1A, IL-1alpha|RELA|TAB2|NFKBIA, ECI-6/IKBA, IKBA|MYD88|TNF, TNFa|FCGR1A|STAT1|	http://www.genome.jp/kegg-bin/show_pathway?ssc05140/ssc:613130%09red/ssc:100156182%09red/ssc:397086%09red/ssc:397094%09red/ssc:100135665%09red/ssc:396646%09red/ssc:396655%09red/ssc:406188%09red
Toxoplasmosis	KEGG PATHWAY	ssc05145	12	115	0.0272671	0.403554	ENSSSCG00000030900|ENSSSCG00000012981|ENSSSCG00000003395|ENSSSCG00000028512|ENSSSCG00000017403|ENSSSCG00000015618|ENSSSCG00000015085|ENSSSCG00000004110|ENSSSCG00000001952|ENSSSCG00000011251|ENSSSCG00000001404|ENSSSCG00000016057	ssc:396801|ssc:100135665|ssc:100518131|ssc:396801|ssc:733648|ssc:100513489|ssc:100525654|ssc:100156182|ssc:406188|ssc:396646|ssc:397086|ssc:396655|	396801|100135665|100518131|396801|733648|100513489|100525654|100156182|406188|396646|397086|396655|	LDLR|RELA|PIK3CD|LDLR|STAT3|LAMB3|IL10RA|TAB2|NFKBIA, ECI-6/IKBA, IKBA|MYD88|TNF, TNFa|STAT1|	http://www.genome.jp/kegg-bin/show_pathway?ssc05145/ssc:396801%09red/ssc:100518131%09red/ssc:733648%09red/ssc:100156182%09red/ssc:100525654%09red/ssc:397086%09red/ssc:100135665%09red/ssc:396646%09red/ssc:396655%09red/ssc:406188%09red/ssc:100513489%09red
Epstein-Barr virus infection	KEGG PATHWAY	ssc05169	17	189	0.0325505	0.451639	ENSSSCG00000008208|ENSSSCG00000012981|ENSSSCG00000003395|ENSSSCG00000030408|ENSSSCG00000002525|ENSSSCG00000005711|ENSSSCG00000017403|ENSSSCG00000001341|ENSSSCG00000006250|ENSSSCG00000004110|ENSSSCG00000001952|ENSSSCG00000025181|ENSSSCG00000028278|ENSSSCG00000000068|ENSSSCG00000001414|ENSSSCG00000005965|ENSSSCG00000015085	ssc:100513348|ssc:100135665|ssc:100518131|ssc:396723|ssc:100156979|ssc:100155564|ssc:733648|ssc:100135031|ssc:100152890|ssc:100156182|ssc:406188|ssc:100523731|ssc:100737040|ssc:100156226|ssc:397211|ssc:448810|ssc:100525654|	100513348|100135665|100518131|396723|100156979|100155564|733648|100135031|100152890|100156182|406188|100523731|100737040|100156226|397211|448810|100525654|	EIF2AK3|RELA|PIK3CD|DDX58, RHIV-1, RIG-1, RIG-I, RLR-1|TRAF3, TRAF3_TV1|NUP214|STAT3|SLA-2, SLA-B|LYN|TAB2|NFKBIA, ECI-6/IKBA, IKBA| |POLR2A|EP300|CSNK2B, CK2N, CKII_beta|MYC|IL10RA|	http://www.genome.jp/kegg-bin/show_pathway?ssc05169/ssc:448810%09red/ssc:100518131%09red/ssc:100152890%09red/ssc:100523731%09red/ssc:100155564%09red/ssc:397211%09red/ssc:100135665%09red/ssc:100156182%09red/ssc:100525654%09red/ssc:100156979%09red/ssc:396723%09red/ssc:100135031%09red/ssc:100513348%09red/ssc:100156226%09red/ssc:100737040%09red/ssc:733648%09red/ssc:406188%09red
Salmonella infection	KEGG PATHWAY	ssc05132	9	81	0.0379633	0.495756	ENSSSCG00000008090|ENSSSCG00000012981|ENSSSCG00000017698|ENSSSCG00000028711|ENSSSCG00000009821|ENSSSCG00000002538|ENSSSCG00000011251|ENSSSCG00000007585|ENSSSCG00000028355	ssc:397094|ssc:100135665|ssc:396668|ssc:397319|ssc:100154518|ssc:100037291|ssc:396646|ssc:414396|ssc:397653|	397094|100135665|396668|397319|100154518|100037291|396646|414396|397653|	IL1A, IL-1alpha|RELA|CCL4, MIP-1BETA, MIP1b, SCY4A|CASP1|ARPC3|DYNC1H1|MYD88|ACTB|ACTB|	http://www.genome.jp/kegg-bin/show_pathway?ssc05132/ssc:100135665%09red/ssc:414396%09red/ssc:100037291%09red/ssc:397094%09red/ssc:396668%09red/ssc:397319%09red/ssc:397653%09red/ssc:396646%09red/ssc:100154518%09red
Chronic myeloid leukemia	KEGG PATHWAY	ssc05220	8	69	0.0402684	0.496643	ENSSSCG00000012981|ENSSSCG00000003395|ENSSSCG00000012051|ENSSSCG00000015115|ENSSSCG00000001952|ENSSSCG00000008478|ENSSSCG00000022486|ENSSSCG00000005965	ssc:100135665|ssc:100518131|ssc:100512633|ssc:100518854|ssc:406188|ssc:100520187|ssc:100621690|ssc:448810|	100135665|100518131|100512633|100518854|406188|100520187|100621690|448810|	RELA|PIK3CD|RUNX1|CBL|NFKBIA, ECI-6/IKBA, IKBA| |CBLB|MYC|	http://www.genome.jp/kegg-bin/show_pathway?ssc05220/ssc:448810%09red/ssc:100518131%09red/ssc:100520187%09red/ssc:100135665%09red/ssc:100518854%09red/ssc:100621690%09red/ssc:100512633%09red/ssc:406188%09red
Jak-STAT signaling pathway	KEGG PATHWAY	ssc04630	14	153	0.0439734	0.513795	ENSSSCG00000016832|ENSSSCG00000008478|ENSSSCG00000000396|ENSSSCG00000027628|ENSSSCG00000017403|ENSSSCG00000003395|ENSSSCG00000015115|ENSSSCG00000015085|ENSSSCG00000022486|ENSSSCG00000006689|ENSSSCG00000000068|ENSSSCG00000008357|ENSSSCG00000005965|ENSSSCG00000016057	ssc:100271930|ssc:100520187|ssc:396923|ssc:399522|ssc:733648|ssc:100518131|ssc:100518854|ssc:100525654|ssc:100621690|ssc:100511878|ssc:100156226|ssc:100518067|ssc:448810|ssc:396655|	100271930|100520187|396923|399522|733648|100518131|100518854|100525654|100621690|100511878|100156226|100518067|448810|396655|	IL7R, CD127| |STAT2|IL6R, IL-6Ralpha|STAT3|PIK3CD|CBL|IL10RA|CBLB|PIAS3|EP300|SPRED2|MYC|STAT1|	http://www.genome.jp/kegg-bin/show_pathway?ssc04630/ssc:448810%09red/ssc:100518131%09red/ssc:733648%09red/ssc:100271930%09red/ssc:100518067%09red/ssc:100520187%09red/ssc:100156226%09red/ssc:100518854%09red/ssc:396923%09red/ssc:100621690%09red/ssc:396655%09red/ssc:100511878%09red/ssc:100525654%09red/ssc:399522%09red
Bacterial invasion of epithelial cells	KEGG PATHWAY	ssc05100	8	73	0.0517744	0.543075	ENSSSCG00000003395|ENSSSCG00000014058|ENSSSCG00000007585|ENSSSCG00000009821|ENSSSCG00000022486|ENSSSCG00000015115|ENSSSCG00000028355|ENSSSCG00000016656	ssc:100518131|ssc:100525860|ssc:414396|ssc:100154518|ssc:100621690|ssc:100518854|ssc:397653|ssc:100522109|	100518131|100525860|414396|100154518|100621690|100518854|397653|100522109|	PIK3CD|CLTB|ACTB|ARPC3|CBLB|CBL|ACTB|ELMO1|	http://www.genome.jp/kegg-bin/show_pathway?ssc05100/ssc:100522109%09red/ssc:100518131%09red/ssc:100525860%09red/ssc:414396%09red/ssc:100621690%09red/ssc:100518854%09red/ssc:397653%09red/ssc:100154518%09red
Ribosome	KEGG PATHWAY	ssc03010	13	143	0.052926	0.543075	ENSSSCG00000025883|ENSSSCG00000001543|ENSSSCG00000004945|ENSSSCG00000011856|ENSSSCG00000002529|ENSSSCG00000029642|ENSSSCG00000021007|ENSSSCG00000006081|ENSSSCG00000011266|ENSSSCG00000009019|ENSSSCG00000024260|ENSSSCG00000022357|ENSSSCG00000010328	ssc:100626973|ssc:100037993|ssc:100038029|ssc:100514796|ssc:100037996|ssc:100625001|ssc:100625069|ssc:100156811|ssc:641351|ssc:414390|ssc:414422|ssc:100514637|ssc:100155012|	100626973|100037993|100038029|100514796|100037996|100625001|100625069|100156811|641351|414390|414422|100514637|100155012|	RPL37|RPL10A| |RPL35A|RPS21|RPL17|MRPL19|RPL30|RPSA, LAMR1|RPS3A|RPL11|RPS27A|RPS24|	http://www.genome.jp/kegg-bin/show_pathway?ssc03010/ssc:100514637%09red/ssc:100038029%09red/ssc:100155012%09red/ssc:100625001%09red/ssc:100625069%09red/ssc:414390%09red/ssc:100037993%09red/ssc:641351%09red/ssc:414422%09red/ssc:100037996%09red/ssc:100514796%09red/ssc:100156811%09red/ssc:100626973%09red
Spliceosome	KEGG PATHWAY	ssc03040	12	129	0.0538183	0.543075	ENSSSCG00000017155|ENSSSCG00000017817|ENSSSCG00000027224|ENSSSCG00000027323|ENSSSCG00000029341|ENSSSCG00000006756|ENSSSCG00000021615|ENSSSCG00000017626|ENSSSCG00000010002|ENSSSCG00000014416|ENSSSCG00000013602|ENSSSCG00000008127	ssc:100101926|ssc:100526074|ssc:100511501|ssc:100156513|ssc:100622596|ssc:100154006|ssc:100625186|ssc:654327|ssc:100154850|ssc:100621703|ssc:100514153|ssc:100739577|	100101926|100526074|100511501|100156513|100622596|100154006|100625186|654327|100154850|100621703|100514153|100739577|	EIF4A3, DDX48, eIF4A-III|PRPF8|PCBP1|NCBP2|ISY1|BCAS2|SRSF10|SRSF1, SFRS1|SF3A1|TCERG1|HNRNPM|SNRNP200|	http://www.genome.jp/kegg-bin/show_pathway?ssc03040/ssc:100622596%09red/ssc:100514153%09red/ssc:100156513%09red/ssc:100621703%09red/ssc:100154850%09red/ssc:100526074%09red/ssc:654327%09red/ssc:100511501%09red/ssc:100739577%09red/ssc:100154006%09red/ssc:100101926%09red/ssc:100625186%09red
Viral carcinogenesis	KEGG PATHWAY	ssc05203	16	189	0.0566246	0.546551	ENSSSCG00000008388|ENSSSCG00000003395|ENSSSCG00000001341|ENSSSCG00000002525|ENSSSCG00000003488|ENSSSCG00000017403|ENSSSCG00000016263|ENSSSCG00000017414|ENSSSCG00000006250|ENSSSCG00000001952|ENSSSCG00000025181|ENSSSCG00000007026|ENSSSCG00000012981|ENSSSCG00000000068|ENSSSCG00000010224|ENSSSCG00000001516	ssc:100525104|ssc:100518131|ssc:100135031|ssc:100156979|ssc:100511934|ssc:733648|ssc:100516940|ssc:100524215|ssc:100152890|ssc:406188|ssc:100523731|ssc:397651|ssc:100135665|ssc:100156226|ssc:100038004|ssc:397543|	100525104|100518131|100135031|100156979|100511934|733648|100516940|100524215|100152890|406188|100523731|397651|100135665|100156226|100038004|397543|	REL|PIK3CD|SLA-2, SLA-B|TRAF3, TRAF3_TV1|UBR4|STAT3|SP100|KAT2A|LYN|NFKBIA, ECI-6/IKBA, IKBA| |VDAC1P5, VDAC3, VDAC5P|RELA|EP300|EGR2|BAK, Bak1|	http://www.genome.jp/kegg-bin/show_pathway?ssc05203/ssc:100518131%09red/ssc:100525104%09red/ssc:100523731%09red/ssc:100038004%09red/ssc:733648%09red/ssc:100135665%09red/ssc:100152890%09red/ssc:100156979%09red/ssc:100135031%09red/ssc:100516940%09red/ssc:397543%09red/ssc:100156226%09red/ssc:100511934%09red/ssc:397651%09red/ssc:406188%09red/ssc:100524215%09red
Pathways in cancer	KEGG PATHWAY	ssc05200	24	319	0.0678776	0.627868	ENSSSCG00000000769|ENSSSCG00000022486|ENSSSCG00000002525|ENSSSCG00000017403|ENSSSCG00000015115|ENSSSCG00000003413|ENSSSCG00000003140|ENSSSCG00000015618|ENSSSCG00000010638|ENSSSCG00000015815|ENSSSCG00000002282|ENSSSCG00000000068|ENSSSCG00000005965|ENSSSCG00000009545|ENSSSCG00000012981|ENSSSCG00000003395|ENSSSCG00000010211|ENSSSCG00000012051|ENSSSCG00000023368|ENSSSCG00000001912|ENSSSCG00000001952|…	ssc:594852|ssc:100621690|ssc:100156979|ssc:733648|ssc:100518854|ssc:100127359|ssc:100302504|ssc:100513489|ssc:100153922|ssc:100153248|ssc:100517170|ssc:100156226|ssc:448810|ssc:100153454|ssc:100135665|ssc:100518131|ssc:100155896|ssc:100512633|ssc:100517317|ssc:100157336|ssc:406188|ssc:100520187|ssc:100513970|ssc:396655|	594852|100621690|100156979|733648|100518854|100127359|100302504|100513489|100153922|100153248|100517170|100156226|448810|100153454|100135665|100518131|100155896|100512633|100517317|100157336|406188|100520187|100513970|396655|	BID|CBLB|TRAF3, TRAF3_TV1|STAT3|CBL|MTOR, FRAP1|FGF21|LAMB3|TCF7L2|FGFR1|MAX|EP300|MYC|COL4A2|RELA|PIK3CD|CCDC6|RUNX1| |PML|NFKBIA, ECI-6/IKBA, IKBA| |RALGDS|STAT1|	http://www.genome.jp/kegg-bin/show_pathway?ssc05200/ssc:448810%09red/ssc:100155896%09red/ssc:100153248%09red/ssc:100513970%09red/ssc:100156226%09red/ssc:100127359%09red/ssc:100517170%09red/ssc:100153454%09red/ssc:100302504%09red/ssc:100517317%09red/ssc:733648%09red/ssc:100520187%09red/ssc:100513489%09red/ssc:100512633%09red/ssc:100153922%09red/ssc:100156979%09red/ssc:100157336%09red/ssc:100135665…
T cell receptor signaling pathway	KEGG PATHWAY	ssc04660	10	107	0.0722368	0.641462	ENSSSCG00000012981|ENSSSCG00000003395|ENSSSCG00000017006|ENSSSCG00000011843|ENSSSCG00000015115|ENSSSCG00000001952|ENSSSCG00000008478|ENSSSCG00000022486|ENSSSCG00000001404|ENSSSCG00000010301	ssc:100135665|ssc:100518131|ssc:100511843|ssc:100511837|ssc:100518854|ssc:406188|ssc:100520187|ssc:100621690|ssc:397086|ssc:396603|	100135665|100518131|100511843|100511837|100518854|406188|100520187|100621690|397086|396603|	RELA|PIK3CD|LCP2|PAK2|CBL|NFKBIA, ECI-6/IKBA, IKBA| |CBLB|TNF, TNFa|PPP3CB|	http://www.genome.jp/kegg-bin/show_pathway?ssc04660/ssc:100511837%09red/ssc:100518131%09red/ssc:397086%09red/ssc:396603%09red/ssc:100520187%09red/ssc:100135665%09red/ssc:100518854%09red/ssc:100511843%09red/ssc:100621690%09red/ssc:406188%09red
Natural killer cell mediated cytotoxicity	KEGG PATHWAY	ssc04650	10	108	0.0755402	0.643111	ENSSSCG00000003395|ENSSSCG00000017006|ENSSSCG00000022004|ENSSSCG00000020906|ENSSSCG00000001404|ENSSSCG00000000769|ENSSSCG00000008478|ENSSSCG00000009637|ENSSSCG00000010301|ENSSSCG00000006374	ssc:100518131|ssc:100511843|ssc:100626548|ssc:406191|ssc:397086|ssc:594852|ssc:100520187|ssc:100624226|ssc:396603|ssc:100153635|	100518131|100511843|100626548|406191|397086|594852|100520187|100624226|396603|100153635|	PIK3CD|LCP2|SH3BP2|TNFSF10, TRAIL|TNF, TNFa|BID| | |PPP3CB|CD244|	http://www.genome.jp/kegg-bin/show_pathway?ssc04650/ssc:100518131%09red/ssc:100626548%09red/ssc:397086%09red/ssc:406191%09red/ssc:396603%09red/ssc:100520187%09red/ssc:100511843%09red/ssc:100153635%09red/ssc:594852%09red/ssc:100624226%09red
Antigen processing and presentation	KEGG PATHWAY	ssc04612	7	68	0.0842461	0.643111	ENSSSCG00000001341|ENSSSCG00000002006|ENSSSCG00000001507|ENSSSCG00000020893|ENSSSCG00000001404|ENSSSCG00000025173|ENSSSCG00000006625	ssc:100135031|ssc:397572|ssc:100155428|ssc:733649|ssc:397086|ssc:733650|ssc:100517711|	100135031|397572|100155428|733649|397086|733650|100517711|	SLA-2, SLA-B|PSME1|TAPBP|TAP1|TNF, TNFa|TAP2|RFX5|	http://www.genome.jp/kegg-bin/show_pathway?ssc04612/ssc:733649%09red/ssc:397086%09red/ssc:100135031%09red/ssc:733650%09red/ssc:100155428%09red/ssc:100517711%09red/ssc:397572%09red
Transcriptional misregulation in cancer	KEGG PATHWAY	ssc05202	13	156	0.0870553	0.643111	ENSSSCG00000008388|ENSSSCG00000006678|ENSSSCG00000012981|ENSSSCG00000012051|ENSSSCG00000002282|ENSSSCG00000024152|ENSSSCG00000013307|ENSSSCG00000001880|ENSSSCG00000005965|ENSSSCG00000013457|ENSSSCG00000001912|ENSSSCG00000017202|ENSSSCG00000001561	ssc:100525104|ssc:613130|ssc:100135665|ssc:100512633|ssc:100517170|ssc:100157726|ssc:100512825|ssc:100621221|ssc:448810|ssc:100738665|ssc:100157336|ssc:396970|ssc:100156210|	100525104|613130|100135665|100512633|100517170|100157726|100512825|100621221|448810|100738665|100157336|396970|100156210|	REL|FCGR1A|RELA|RUNX1|MAX|ETV6|LMO2|SIN3A|MYC|DOT1L|PML|H3F3A|ETV7|	http://www.genome.jp/kegg-bin/show_pathway?ssc05202/ssc:448810%09red/ssc:100738665%09red/ssc:100157726%09red/ssc:100512825%09red/ssc:613130%09red/ssc:100157336%09red/ssc:100525104%09red/ssc:100135665%09red/ssc:100517170%09red/ssc:396970%09red/ssc:100156210%09red/ssc:100512633%09red/ssc:100621221%09red
Tuberculosis	KEGG PATHWAY	ssc05152	14	174	0.0953695	0.643111	ENSSSCG00000008090|ENSSSCG00000009123|ENSSSCG00000012981|ENSSSCG00000006625|ENSSSCG00000017401|ENSSSCG00000015085|ENSSSCG00000011251|ENSSSCG00000000769|ENSSSCG00000001404|ENSSSCG00000000068|ENSSSCG00000010301|ENSSSCG00000006678|ENSSSCG00000016057|ENSSSCG00000026940	ssc:397094|ssc:397674|ssc:100135665|ssc:100517711|ssc:100523018|ssc:100525654|ssc:396646|ssc:594852|ssc:397086|ssc:100156226|ssc:396603|ssc:613130|ssc:396655|ssc:100154896|	397094|397674|100135665|100517711|100523018|100525654|396646|594852|397086|100156226|396603|613130|396655|100154896|	IL1A, IL-1alpha|CAMK2D|RELA|RFX5|ATP6V0A1|IL10RA|MYD88|BID|TNF, TNFa|EP300|PPP3CB|FCGR1A|STAT1|CASP10|	http://www.genome.jp/kegg-bin/show_pathway?ssc05152/ssc:100135665%09red/ssc:100154896%09red/ssc:397086%09red/ssc:613130%09red/ssc:396603%09red/ssc:397094%09red/ssc:100523018%09red/ssc:100156226%09red/ssc:100525654%09red/ssc:396646%09red/ssc:397674%09red/ssc:396655%09red/ssc:594852%09red/ssc:100517711%09red
Prostate cancer	KEGG PATHWAY	ssc05215	8	85	0.0979917	0.643111	ENSSSCG00000010638|ENSSSCG00000012981|ENSSSCG00000003395|ENSSSCG00000008478|ENSSSCG00000015815|ENSSSCG00000001952|ENSSSCG00000003413|ENSSSCG00000000068	ssc:100153922|ssc:100135665|ssc:100518131|ssc:100520187|ssc:100153248|ssc:406188|ssc:100127359|ssc:100156226|	100153922|100135665|100518131|100520187|100153248|406188|100127359|100156226|	TCF7L2|RELA|PIK3CD| |FGFR1|NFKBIA, ECI-6/IKBA, IKBA|MTOR, FRAP1|EP300|	http://www.genome.jp/kegg-bin/show_pathway?ssc05215/ssc:100518131%09red/ssc:100153248%09red/ssc:100135665%09red/ssc:406188%09red/ssc:100156226%09red/ssc:100127359%09red/ssc:100520187%09red/ssc:100153922%09red
ErbB signaling pathway	KEGG PATHWAY	ssc04012	8	85	0.0979917	0.643111	ENSSSCG00000003413|ENSSSCG00000003395|ENSSSCG00000009123|ENSSSCG00000011843|ENSSSCG00000015115|ENSSSCG00000008478|ENSSSCG00000022486|ENSSSCG00000005965	ssc:100127359|ssc:100518131|ssc:397674|ssc:100511837|ssc:100518854|ssc:100520187|ssc:100621690|ssc:448810|	100127359|100518131|397674|100511837|100518854|100520187|100621690|448810|	MTOR, FRAP1|PIK3CD|CAMK2D|PAK2|CBL| |CBLB|MYC|	http://www.genome.jp/kegg-bin/show_pathway?ssc04012/ssc:448810%09red/ssc:100511837%09red/ssc:100621690%09red/ssc:100518854%09red/ssc:100127359%09red/ssc:397674%09red/ssc:100520187%09red/ssc:100518131%09red
Adherens junction	KEGG PATHWAY	ssc04520	7	71	0.0988555	0.643111	ENSSSCG00000010638|ENSSSCG00000013174|ENSSSCG00000007585|ENSSSCG00000015815|ENSSSCG00000000068|ENSSSCG00000001414|ENSSSCG00000028355	ssc:100153922|ssc:100519699|ssc:414396|ssc:100153248|ssc:100156226|ssc:397211|ssc:397653|	100153922|100519699|414396|100153248|100156226|397211|397653|	TCF7L2|CTNND1|ACTB|FGFR1|EP300|CSNK2B, CK2N, CKII_beta|ACTB|	http://www.genome.jp/kegg-bin/show_pathway?ssc04520/ssc:397211%09red/ssc:414396%09red/ssc:100156226%09red/ssc:100519699%09red/ssc:397653%09red/ssc:100153248%09red/ssc:100153922%09red
Notch signaling pathway	KEGG PATHWAY	ssc04330	5	44	0.100144	0.643111	ENSSSCG00000000068|ENSSSCG00000014019|ENSSSCG00000000449|ENSSSCG00000017414|ENSSSCG00000011876	ssc:100156226|ssc:100520231|ssc:100521724|ssc:100524215|ssc:100520459|	100156226|100520231|100521724|100524215|100520459|	EP300|MAML1| |KAT2A|DTX3L|	http://www.genome.jp/kegg-bin/show_pathway?ssc04330/ssc:100520231%09red/ssc:100156226%09red/ssc:100521724%09red/ssc:100520459%09red/ssc:100524215%09red
Sulfur relay system	KEGG PATHWAY	ssc04122	2	9	0.103691	0.643111	ENSSSCG00000007307|ENSSSCG00000001596	ssc:100156145|ssc:100154835|	100156145|100154835|	|MOCS1|	http://www.genome.jp/kegg-bin/show_pathway?ssc04122/ssc:100154835%09red/ssc:100156145%09red
B cell receptor signaling pathway	KEGG PATHWAY	ssc04662	7	72	0.104015	0.643111	ENSSSCG00000012981|ENSSSCG00000003395|ENSSSCG00000010509|ENSSSCG00000001952|ENSSSCG00000008478|ENSSSCG00000010301|ENSSSCG00000006250	ssc:100135665|ssc:100518131|ssc:100155165|ssc:406188|ssc:100520187|ssc:396603|ssc:100152890|	100135665|100518131|100155165|406188|100520187|396603|100152890|	RELA|PIK3CD|PIK3AP1|NFKBIA, ECI-6/IKBA, IKBA| |PPP3CB|LYN|	http://www.genome.jp/kegg-bin/show_pathway?ssc04662/ssc:100518131%09red/ssc:100152890%09red/ssc:100520187%09red/ssc:396603%09red/ssc:100135665%09red/ssc:100155165%09red/ssc:406188%09red
Linoleic acid metabolism	KEGG PATHWAY	ssc00591	4	32	0.10656	0.643111	ENSSSCG00000023320|ENSSSCG00000010491|ENSSSCG00000021395|ENSSSCG00000026798	ssc:100144468|ssc:403111|ssc:100126281|ssc:403111|	100144468|403111|100126281|403111|	CYP3A22|CYP2C42|CYP3A46, CYP3A88|CYP2C42|	http://www.genome.jp/kegg-bin/show_pathway?ssc00591/ssc:100126281%09red/ssc:403111%09red/ssc:100144468%09red
Synaptic vesicle cycle	KEGG PATHWAY	ssc04721	6	59	0.109593	0.643111	ENSSSCG00000017401|ENSSSCG00000014058|ENSSSCG00000005617|ENSSSCG00000003120|ENSSSCG00000003199|ENSSSCG00000006054	ssc:100523018|ssc:100525860|ssc:100517927|ssc:100515953|ssc:100520250|ssc:100154942|	100523018|100525860|100517927|100515953|100520250|100154942|	ATP6V0A1|CLTB|STXBP1|NAPA|AP2A1|ATP6V1C1|	http://www.genome.jp/kegg-bin/show_pathway?ssc04721/ssc:100154942%09red/ssc:100517927%09red/ssc:100525860%09red/ssc:100523018%09red/ssc:100515953%09red/ssc:100520250%09red
Small cell lung cancer	KEGG PATHWAY	ssc05222	8	88	0.112309	0.643111	ENSSSCG00000012981|ENSSSCG00000003395|ENSSSCG00000002525|ENSSSCG00000002282|ENSSSCG00000015618|ENSSSCG00000001952|ENSSSCG00000005965|ENSSSCG00000009545	ssc:100135665|ssc:100518131|ssc:100156979|ssc:100517170|ssc:100513489|ssc:406188|ssc:448810|ssc:100153454|	100135665|100518131|100156979|100517170|100513489|406188|448810|100153454|	RELA|PIK3CD|TRAF3, TRAF3_TV1|MAX|LAMB3|NFKBIA, ECI-6/IKBA, IKBA|MYC|COL4A2|	http://www.genome.jp/kegg-bin/show_pathway?ssc05222/ssc:448810%09red/ssc:100518131%09red/ssc:100156979%09red/ssc:100135665%09red/ssc:100517170%09red/ssc:100153454%09red/ssc:406188%09red/ssc:100513489%09red
Osteoclast differentiation	KEGG PATHWAY	ssc04380	11	133	0.112979	0.643111	ENSSSCG00000008090|ENSSSCG00000003395|ENSSSCG00000000396|ENSSSCG00000012981|ENSSSCG00000017006|ENSSSCG00000004110|ENSSSCG00000001952|ENSSSCG00000001404|ENSSSCG00000010301|ENSSSCG00000006678|ENSSSCG00000016057	ssc:397094|ssc:100518131|ssc:396923|ssc:100135665|ssc:100511843|ssc:100156182|ssc:406188|ssc:397086|ssc:396603|ssc:613130|ssc:396655|	397094|100518131|396923|100135665|100511843|100156182|406188|397086|396603|613130|396655|	IL1A, IL-1alpha|PIK3CD|STAT2|RELA|LCP2|TAB2|NFKBIA, ECI-6/IKBA, IKBA|TNF, TNFa|PPP3CB|FCGR1A|STAT1|	http://www.genome.jp/kegg-bin/show_pathway?ssc04380/ssc:100518131%09red/ssc:613130%09red/ssc:100156182%09red/ssc:397086%09red/ssc:396603%09red/ssc:397094%09red/ssc:100135665%09red/ssc:100511843%09red/ssc:396655%09red/ssc:406188%09red/ssc:396923%09red
Ubiquitin mediated proteolysis	KEGG PATHWAY	ssc04120	11	134	0.117014	0.649429	ENSSSCG00000025638|ENSSSCG00000027057|ENSSSCG00000023379|ENSSSCG00000015509|ENSSSCG00000003111|ENSSSCG00000012328|ENSSSCG00000015115|ENSSSCG00000022486|ENSSSCG00000022101|ENSSSCG00000006689|ENSSSCG00000001912	ssc:100523993|ssc:100514334|ssc:100514753|ssc:100520856|ssc:100515263|ssc:100517442|ssc:100518854|ssc:100621690|ssc:100049662|ssc:100511878|ssc:100157336|	100523993|100514334|100514753|100520856|100515263|100517442|100518854|100621690|100049662|100511878|100157336|	|SYVN1|UBE2L6|RFWD2|SAE1|HUWE1|CBL|CBLB|BRCA1|PIAS3|PML|	http://www.genome.jp/kegg-bin/show_pathway?ssc04120/ssc:100514753%09red/ssc:100515263%09red/ssc:100049662%09red/ssc:100520856%09red/ssc:100157336%09red/ssc:100517442%09red/ssc:100518854%09red/ssc:100523993%09red/ssc:100621690%09red/ssc:100511878%09red/ssc:100514334%09red
Dorso-ventral axis formation	KEGG PATHWAY	ssc04320	3	23	0.141713	0.742777	ENSSSCG00000024152|ENSSSCG00000008478|ENSSSCG00000001561	ssc:100157726|ssc:100520187|ssc:100156210|	100157726|100520187|100156210|	ETV6| |ETV7|	http://www.genome.jp/kegg-bin/show_pathway?ssc04320/ssc:100156210%09red/ssc:100157726%09red/ssc:100520187%09red
Legionellosis	KEGG PATHWAY	ssc05134	6	64	0.14184	0.742777	ENSSSCG00000012981|ENSSSCG00000001952|ENSSSCG00000004169|ENSSSCG00000028711|ENSSSCG00000011251|ENSSSCG00000001404	ssc:100135665|ssc:406188|ssc:100158211|ssc:397319|ssc:396646|ssc:397086|	100135665|406188|100158211|397319|396646|397086|	RELA|NFKBIA, ECI-6/IKBA, IKBA|HBS1L|CASP1|MYD88|TNF, TNFa|	http://www.genome.jp/kegg-bin/show_pathway?ssc05134/ssc:100158211%09red/ssc:397086%09red/ssc:100135665%09red/ssc:397319%09red/ssc:396646%09red/ssc:406188%09red
NOD-like receptor signaling pathway	KEGG PATHWAY	ssc04621	5	50	0.143871	0.742777	ENSSSCG00000004110|ENSSSCG00000028711|ENSSSCG00000001404|ENSSSCG00000012981|ENSSSCG00000001952	ssc:100156182|ssc:397319|ssc:397086|ssc:100135665|ssc:406188|	100156182|397319|397086|100135665|406188|	TAB2|CASP1|TNF, TNFa|RELA|NFKBIA, ECI-6/IKBA, IKBA|	http://www.genome.jp/kegg-bin/show_pathway?ssc04621/ssc:100156182%09red/ssc:397086%09red/ssc:397319%09red/ssc:406188%09red/ssc:100135665%09red
Chemokine signaling pathway	KEGG PATHWAY	ssc04062	13	173	0.148649	0.746281	ENSSSCG00000012981|ENSSSCG00000003395|ENSSSCG00000000396|ENSSSCG00000017403|ENSSSCG00000017721|ENSSSCG00000017698|ENSSSCG00000001952|ENSSSCG00000008478|ENSSSCG00000007669|ENSSSCG00000008977|ENSSSCG00000006250|ENSSSCG00000016057|ENSSSCG00000016656	ssc:100135665|ssc:100518131|ssc:396923|ssc:733648|ssc:100302703|ssc:396668|ssc:406188|ssc:100520187|ssc:100516546|ssc:494019|ssc:100152890|ssc:396655|ssc:100522109|	100135665|100518131|396923|733648|100302703|396668|406188|100520187|100516546|494019|100152890|396655|100522109|	RELA|PIK3CD|STAT2|STAT3|CCL8|CCL4, MIP-1BETA, MIP1b, SCY4A|NFKBIA, ECI-6/IKBA, IKBA| |GNB2|CXCL10|LYN|STAT1|ELMO1|	http://www.genome.jp/kegg-bin/show_pathway?ssc04062/ssc:100522109%09red/ssc:100518131%09red/ssc:100152890%09red/ssc:733648%09red/ssc:100135665%09red/ssc:100302703%09red/ssc:100520187%09red/ssc:494019%09red/ssc:396668%09red/ssc:100516546%09red/ssc:396923%09red/ssc:396655%09red/ssc:406188%09red
Primary immunodeficiency	KEGG PATHWAY	ssc05340	4	37	0.151273	0.746281	ENSSSCG00000025173|ENSSSCG00000016832|ENSSSCG00000020893|ENSSSCG00000006625	ssc:733650|ssc:100271930|ssc:733649|ssc:100517711|	733650|100271930|733649|100517711|	TAP2|IL7R, CD127|TAP1|RFX5|	http://www.genome.jp/kegg-bin/show_pathway?ssc05340/ssc:100271930%09red/ssc:733650%09red/ssc:100517711%09red/ssc:733649%09red
Thyroid cancer	KEGG PATHWAY	ssc05216	3	26	0.178848	0.846355	ENSSSCG00000010638|ENSSSCG00000005965|ENSSSCG00000010211	ssc:100153922|ssc:448810|ssc:100155896|	100153922|448810|100155896|	TCF7L2|MYC|CCDC6|	http://www.genome.jp/kegg-bin/show_pathway?ssc05216/ssc:448810%09red/ssc:100155896%09red/ssc:100153922%09red
Hematopoietic cell lineage	KEGG PATHWAY	ssc04640	7	85	0.183289	0.846355	ENSSSCG00000008090|ENSSSCG00000016832|ENSSSCG00000001849|ENSSSCG00000010505|ENSSSCG00000027628|ENSSSCG00000001404|ENSSSCG00000006678	ssc:397094|ssc:100271930|ssc:397520|ssc:100518694|ssc:399522|ssc:397086|ssc:613130|	397094|100271930|397520|100518694|399522|397086|613130|	IL1A, IL-1alpha|IL7R, CD127|ANPEP, APN, PEPN|DNTT|IL6R, IL-6Ralpha|TNF, TNFa|FCGR1A|	http://www.genome.jp/kegg-bin/show_pathway?ssc04640/ssc:100271930%09red/ssc:100518694%09red/ssc:397094%09red/ssc:613130%09red/ssc:397520%09red/ssc:397086%09red/ssc:399522%09red
Amyotrophic lateral sclerosis (ALS)	KEGG PATHWAY	ssc05014	5	55	0.185506	0.846355	ENSSSCG00000028711|ENSSSCG00000000769|ENSSSCG00000001404|ENSSSCG00000001509|ENSSSCG00000010301	ssc:397319|ssc:594852|ssc:397086|ssc:100524813|ssc:396603|	397319|594852|397086|100524813|396603|	CASP1|BID|TNF, TNFa|DAXX|PPP3CB|	http://www.genome.jp/kegg-bin/show_pathway?ssc05014/ssc:397086%09red/ssc:396603%09red/ssc:397319%09red/ssc:594852%09red/ssc:100524813%09red
RNA transport	KEGG PATHWAY	ssc03013	11	149	0.186808	0.846355	ENSSSCG00000017212|ENSSSCG00000007705|ENSSSCG00000017155|ENSSSCG00000005711|ENSSSCG00000027323|ENSSSCG00000011491|ENSSSCG00000012727|ENSSSCG00000017514|ENSSSCG00000005667|ENSSSCG00000017430|ENSSSCG00000017054	ssc:397044|ssc:100512219|ssc:100101926|ssc:100155564|ssc:100156513|ssc:100519334|ssc:100155078|ssc:100518449|ssc:100153500|ssc:100736981|ssc:100523290|	397044|100512219|100101926|100155564|100156513|100519334|100155078|100518449|100153500|100736981|100523290|	SUMO2, PSMT3, SMT3H2, Smt3A|POM121C|EIF4A3, DDX48, eIF4A-III|NUP214|NCBP2|THOC7|FMR1|KPNB1|NUP188| |CYFIP2|	http://www.genome.jp/kegg-bin/show_pathway?ssc03013/ssc:100155564%09red/ssc:100156513%09red/ssc:397044%09red/ssc:100153500%09red/ssc:100512219%09red/ssc:100518449%09red/ssc:100736981%09red/ssc:100523290%09red/ssc:100519334%09red/ssc:100101926%09red/ssc:100155078%09red
Endocrine and other factor-regulated calcium reabsorption	KEGG PATHWAY	ssc04961	4	42	0.201769	0.884807	ENSSSCG00000003199|ENSSSCG00000006740|ENSSSCG00000014058|ENSSSCG00000006125	ssc:100520250|ssc:397481|ssc:100525860|ssc:100153645|	100520250|397481|100525860|100153645|	AP2A1|ATP1A1|CLTB|CALB1|	http://www.genome.jp/kegg-bin/show_pathway?ssc04961/ssc:397481%09red/ssc:100525860%09red/ssc:100520250%09red/ssc:100153645%09red
Inositol phosphate metabolism	KEGG PATHWAY	ssc00562	5	57	0.203266	0.884807	ENSSSCG00000005629|ENSSSCG00000003395|ENSSSCG00000016050|ENSSSCG00000010092|ENSSSCG00000027340	ssc:100523714|ssc:100518131|ssc:100514878|ssc:100157143|ssc:100623115|	100523714|100518131|100514878|100157143|100623115|	PIP5KL1|PIK3CD|INPP1|PI4KA|PI4K2B|	http://www.genome.jp/kegg-bin/show_pathway?ssc00562/ssc:100518131%09red/ssc:100514878%09red/ssc:100157143%09red/ssc:100523714%09red/ssc:100623115%09red
Proteoglycans in cancer	KEGG PATHWAY	ssc05205	13	192	0.238425	0.999375	ENSSSCG00000003395|ENSSSCG00000008478|ENSSSCG00000028355|ENSSSCG00000009123|ENSSSCG00000017403|ENSSSCG00000015815|ENSSSCG00000015115|ENSSSCG00000003413|ENSSSCG00000022486|ENSSSCG00000000555|ENSSSCG00000001404|ENSSSCG00000005965|ENSSSCG00000007585	ssc:100518131|ssc:100520187|ssc:397653|ssc:397674|ssc:733648|ssc:100153248|ssc:100518854|ssc:100127359|ssc:100621690|ssc:100155015|ssc:397086|ssc:448810|ssc:414396|	100518131|100520187|397653|397674|733648|100153248|100518854|100127359|100621690|100155015|397086|448810|414396|	PIK3CD| |ACTB|CAMK2D|STAT3|FGFR1|CBL|MTOR, FRAP1|CBLB|ITPR3|TNF, TNFa|MYC|ACTB|	http://www.genome.jp/kegg-bin/show_pathway?ssc05205/ssc:448810%09red/ssc:100518131%09red/ssc:100153248%09red/ssc:733648%09red/ssc:414396%09red/ssc:100621690%09red/ssc:397086%09red/ssc:100518854%09red/ssc:397653%09red/ssc:100127359%09red/ssc:397674%09red/ssc:100520187%09red/ssc:100155015%09red
TNF signaling pathway	KEGG PATHWAY	ssc04668	8	109	0.239668	0.999375	ENSSSCG00000012981|ENSSSCG00000003395|ENSSSCG00000002525|ENSSSCG00000004110|ENSSSCG00000001952|ENSSSCG00000001404|ENSSSCG00000008977|ENSSSCG00000026940	ssc:100135665|ssc:100518131|ssc:100156979|ssc:100156182|ssc:406188|ssc:397086|ssc:494019|ssc:100154896|	100135665|100518131|100156979|100156182|406188|397086|494019|100154896|	RELA|PIK3CD|TRAF3, TRAF3_TV1|TAB2|NFKBIA, ECI-6/IKBA, IKBA|TNF, TNFa|CXCL10|CASP10|	http://www.genome.jp/kegg-bin/show_pathway?ssc04668/ssc:100518131%09red/ssc:100135665%09red/ssc:100154896%09red/ssc:397086%09red/ssc:100156979%09red/ssc:494019%09red/ssc:100156182%09red/ssc:406188%09red
Inflammatory bowel disease (IBD)	KEGG PATHWAY	ssc05321	5	62	0.24988	0.999375	ENSSSCG00000017403|ENSSSCG00000008090|ENSSSCG00000012981|ENSSSCG00000016057|ENSSSCG00000001404	ssc:733648|ssc:397094|ssc:100135665|ssc:396655|ssc:397086|	733648|397094|100135665|396655|397086|	STAT3|IL1A, IL-1alpha|RELA|STAT1|TNF, TNFa|	http://www.genome.jp/kegg-bin/show_pathway?ssc05321/ssc:396655%09red/ssc:397086%09red/ssc:397094%09red/ssc:733648%09red/ssc:100135665%09red
Pancreatic cancer	KEGG PATHWAY	ssc05212	5	63	0.259517	0.999375	ENSSSCG00000012981|ENSSSCG00000003395|ENSSSCG00000005738|ENSSSCG00000016057|ENSSSCG00000017403	ssc:100135665|ssc:100518131|ssc:100513970|ssc:396655|ssc:733648|	100135665|100518131|100513970|396655|733648|	RELA|PIK3CD|RALGDS|STAT1|STAT3|	http://www.genome.jp/kegg-bin/show_pathway?ssc05212/ssc:100518131%09red/ssc:396655%09red/ssc:100513970%09red/ssc:733648%09red/ssc:100135665%09red
Fc epsilon RI signaling pathway	KEGG PATHWAY	ssc04664	5	63	0.259517	0.999375	ENSSSCG00000017006|ENSSSCG00000001404|ENSSSCG00000003395|ENSSSCG00000008478|ENSSSCG00000006250	ssc:100511843|ssc:397086|ssc:100518131|ssc:100520187|ssc:100152890|	100511843|397086|100518131|100520187|100152890|	LCP2|TNF, TNFa|PIK3CD| |LYN|	http://www.genome.jp/kegg-bin/show_pathway?ssc04664/ssc:100518131%09red/ssc:100520187%09red/ssc:100152890%09red/ssc:397086%09red/ssc:100511843%09red
Type II diabetes mellitus	KEGG PATHWAY	ssc04930	4	48	0.267679	0.999375	ENSSSCG00000023503|ENSSSCG00000003395|ENSSSCG00000003413|ENSSSCG00000001404	ssc:100622955|ssc:100518131|ssc:100127359|ssc:397086|	100622955|100518131|100127359|397086|	PRKCD|PIK3CD|MTOR, FRAP1|TNF, TNFa|	http://www.genome.jp/kegg-bin/show_pathway?ssc04930/ssc:100518131%09red/ssc:100622955%09red/ssc:397086%09red/ssc:100127359%09red
Endometrial cancer	KEGG PATHWAY	ssc05213	4	49	0.279043	0.999375	ENSSSCG00000010638|ENSSSCG00000003395|ENSSSCG00000005965|ENSSSCG00000008478	ssc:100153922|ssc:100518131|ssc:448810|ssc:100520187|	100153922|100518131|448810|100520187|	TCF7L2|PIK3CD|MYC| |	http://www.genome.jp/kegg-bin/show_pathway?ssc05213/ssc:448810%09red/ssc:100518131%09red/ssc:100520187%09red/ssc:100153922%09red
Platelet activation	KEGG PATHWAY	ssc04611	9	132	0.283811	0.999375	ENSSSCG00000003395|ENSSSCG00000028355|ENSSSCG00000030156|ENSSSCG00000017006|ENSSSCG00000005317|ENSSSCG00000003107|ENSSSCG00000007585|ENSSSCG00000000555|ENSSSCG00000006250	ssc:100518131|ssc:397653|ssc:100514179|ssc:100511843|ssc:100157220|ssc:100514580|ssc:414396|ssc:100155015|ssc:100152890|	100518131|397653|100514179|100511843|100157220|100514580|414396|100155015|100152890|	PIK3CD|ACTB|APBB1IP|LCP2|TLN1, talin-1| |ACTB|ITPR3|LYN|	http://www.genome.jp/kegg-bin/show_pathway?ssc04611/ssc:100518131%09red/ssc:100514179%09red/ssc:100152890%09red/ssc:100514580%09red/ssc:414396%09red/ssc:397653%09red/ssc:100511843%09red/ssc:100157220%09red/ssc:100155015%09red
FoxO signaling pathway	KEGG PATHWAY	ssc04068	9	133	0.290702	0.999375	ENSSSCG00000010235|ENSSSCG00000016832|ENSSSCG00000017403|ENSSSCG00000020906|ENSSSCG00000023368|ENSSSCG00000003395|ENSSSCG00000008478|ENSSSCG00000016925|ENSSSCG00000000068	ssc:751859|ssc:100271930|ssc:733648|ssc:406191|ssc:100517317|ssc:100518131|ssc:100520187|ssc:397251|ssc:100156226|	751859|100271930|733648|406191|100517317|100518131|100520187|397251|100156226|	SIRT1|IL7R, CD127|STAT3|TNFSF10, TRAIL| |PIK3CD| |PLK2|EP300|	http://www.genome.jp/kegg-bin/show_pathway?ssc04068/ssc:100518131%09red/ssc:733648%09red/ssc:100271930%09red/ssc:751859%09red/ssc:100156226%09red/ssc:406191%09red/ssc:100520187%09red/ssc:397251%09red/ssc:100517317%09red
Prolactin signaling pathway	KEGG PATHWAY	ssc04917	5	67	0.29884	0.999375	ENSSSCG00000012981|ENSSSCG00000003395|ENSSSCG00000008478|ENSSSCG00000016057|ENSSSCG00000017403	ssc:100135665|ssc:100518131|ssc:100520187|ssc:396655|ssc:733648|	100135665|100518131|100520187|396655|733648|	RELA|PIK3CD| |STAT1|STAT3|	http://www.genome.jp/kegg-bin/show_pathway?ssc04917/ssc:100518131%09red/ssc:396655%09red/ssc:100520187%09red/ssc:733648%09red/ssc:100135665%09red
Graft-versus-host disease	KEGG PATHWAY	ssc05332	3	35	0.301031	0.999375	ENSSSCG00000008090|ENSSSCG00000001341|ENSSSCG00000001404	ssc:397094|ssc:100135031|ssc:397086|	397094|100135031|397086|	IL1A, IL-1alpha|SLA-2, SLA-B|TNF, TNFa|	http://www.genome.jp/kegg-bin/show_pathway?ssc05332/ssc:100135031%09red/ssc:397086%09red/ssc:397094%09red
Steroid hormone biosynthesis	KEGG PATHWAY	ssc00140	4	51	0.301978	0.999375	ENSSSCG00000023320|ENSSSCG00000010491|ENSSSCG00000021395|ENSSSCG00000026798	ssc:100144468|ssc:403111|ssc:100126281|ssc:403111|	100144468|403111|100126281|403111|	CYP3A22|CYP2C42|CYP3A46, CYP3A88|CYP2C42|	http://www.genome.jp/kegg-bin/show_pathway?ssc00140/ssc:100126281%09red/ssc:403111%09red/ssc:100144468%09red
mRNA surveillance pathway	KEGG PATHWAY	ssc03015	6	84	0.302947	0.999375	ENSSSCG00000017155|ENSSSCG00000027323|ENSSSCG00000004169|ENSSSCG00000011433|ENSSSCG00000009657|ENSSSCG00000013083	ssc:100101926|ssc:100156513|ssc:100158211|ssc:100522703|ssc:397090|ssc:100519008|	100101926|100156513|100158211|100522703|397090|100519008|	EIF4A3, DDX48, eIF4A-III|NCBP2|HBS1L|WDR82, WDR82P1|PPP2R2A|CPSF7|	http://www.genome.jp/kegg-bin/show_pathway?ssc03015/ssc:100519008%09red/ssc:100158211%09red/ssc:100156513%09red/ssc:397090%09red/ssc:100522703%09red/ssc:100101926%09red
Pyrimidine metabolism	KEGG PATHWAY	ssc00240	7	101	0.304728	0.999375	ENSSSCG00000008399|ENSSSCG00000025233|ENSSSCG00000022912|ENSSSCG00000025298|ENSSSCG00000003973|ENSSSCG00000028278|ENSSSCG00000005478	ssc:100642182|ssc:100642182|ssc:100623678|ssc:100626323|ssc:100525292|ssc:100737040|ssc:100517450|	100642182|100642182|100623678|100626323|100525292|100737040|100517450|	PNPT1|PNPT1|NT5C3A| |CTPS1|POLR2A|POLE3|	http://www.genome.jp/kegg-bin/show_pathway?ssc00240/ssc:100737040%09red/ssc:100623678%09red/ssc:100642182%09red/ssc:100525292%09red/ssc:100517450%09red/ssc:100626323%09red
Endocytosis	KEGG PATHWAY	ssc04144	13	206	0.315255	0.999375	ENSSSCG00000005629|ENSSSCG00000030900|ENSSSCG00000012160|ENSSSCG00000028762|ENSSSCG00000028512|ENSSSCG00000020666|ENSSSCG00000010579|ENSSSCG00000015115|ENSSSCG00000022486|ENSSSCG00000003199|ENSSSCG00000014058|ENSSSCG00000001341|ENSSSCG00000001912	ssc:100523714|ssc:396801|ssc:100522530|ssc:100511491|ssc:396801|ssc:100738234|ssc:100154193|ssc:100518854|ssc:100621690|ssc:100520250|ssc:100525860|ssc:100135031|ssc:100157336|	100523714|396801|100522530|100511491|396801|100738234|100154193|100518854|100621690|100520250|100525860|100135031|100157336|	PIP5KL1|LDLR|SH3KBP1|VPS37C|LDLR|EHD4|GBF1|CBL|CBLB|AP2A1|CLTB|SLA-2, SLA-B|PML|	http://www.genome.jp/kegg-bin/show_pathway?ssc04144/ssc:396801%09red/ssc:100154193%09red/ssc:100523714%09red/ssc:100522530%09red/ssc:100511491%09red/ssc:100525860%09red/ssc:100621690%09red/ssc:100738234%09red/ssc:100157336%09red/ssc:100518854%09red/ssc:100135031%09red/ssc:100520250%09red
Glycosaminoglycan biosynthesis - chondroitin sulfate / dermatan sulfate	KEGG PATHWAY	ssc00532	2	21	0.325138	0.999375	ENSSSCG00000007872|ENSSSCG00000023662	ssc:100514160|ssc:100151968|	100514160|100151968|	XYLT1|CHST3|	http://www.genome.jp/kegg-bin/show_pathway?ssc00532/ssc:100151968%09red/ssc:100514160%09red
Adipocytokine signaling pathway	KEGG PATHWAY	ssc04920	5	70	0.328922	0.999375	ENSSSCG00000017403|ENSSSCG00000001952|ENSSSCG00000003413|ENSSSCG00000012981|ENSSSCG00000001404	ssc:733648|ssc:406188|ssc:100127359|ssc:100135665|ssc:397086|	733648|406188|100127359|100135665|397086|	STAT3|NFKBIA, ECI-6/IKBA, IKBA|MTOR, FRAP1|RELA|TNF, TNFa|	http://www.genome.jp/kegg-bin/show_pathway?ssc04920/ssc:397086%09red/ssc:406188%09red/ssc:733648%09red/ssc:100127359%09red/ssc:100135665%09red
HIF-1 signaling pathway	KEGG PATHWAY	ssc04066	7	104	0.329258	0.999375	ENSSSCG00000012981|ENSSSCG00000003395|ENSSSCG00000009123|ENSSSCG00000017403|ENSSSCG00000027628|ENSSSCG00000003413|ENSSSCG00000000068	ssc:100135665|ssc:100518131|ssc:397674|ssc:733648|ssc:399522|ssc:100127359|ssc:100156226|	100135665|100518131|397674|733648|399522|100127359|100156226|	RELA|PIK3CD|CAMK2D|STAT3|IL6R, IL-6Ralpha|MTOR, FRAP1|EP300|	http://www.genome.jp/kegg-bin/show_pathway?ssc04066/ssc:100518131%09red/ssc:733648%09red/ssc:100135665%09red/ssc:100156226%09red/ssc:100127359%09red/ssc:397674%09red/ssc:399522%09red
Retinol metabolism	KEGG PATHWAY	ssc00830	4	54	0.336725	0.999375	ENSSSCG00000023320|ENSSSCG00000010491|ENSSSCG00000021395|ENSSSCG00000026798	ssc:100144468|ssc:403111|ssc:100126281|ssc:403111|	100144468|403111|100126281|403111|	CYP3A22|CYP2C42|CYP3A46, CYP3A88|CYP2C42|	http://www.genome.jp/kegg-bin/show_pathway?ssc00830/ssc:100126281%09red/ssc:403111%09red/ssc:100144468%09red
RNA degradation	KEGG PATHWAY	ssc03018	5	71	0.33902	0.999375	ENSSSCG00000016193|ENSSSCG00000030404|ENSSSCG00000008399|ENSSSCG00000013124|ENSSSCG00000025233	ssc:100153939|ssc:100625961|ssc:100642182|ssc:100514819|ssc:100642182|	100153939|100625961|100642182|100514819|100642182|	RQCD1|PAPD5|PNPT1|PATL1|PNPT1|	http://www.genome.jp/kegg-bin/show_pathway?ssc03018/ssc:100642182%09red/ssc:100153939%09red/ssc:100625961%09red/ssc:100514819%09red
Non-alcoholic fatty liver disease (NAFLD)	KEGG PATHWAY	ssc04932	10	160	0.357038	0.999375	ENSSSCG00000008208|ENSSSCG00000008090|ENSSSCG00000003395|ENSSSCG00000012981|ENSSSCG00000027628|ENSSSCG00000010795|ENSSSCG00000014145|ENSSSCG00000000769|ENSSSCG00000018094|ENSSSCG00000001404	ssc:100513348|ssc:397094|ssc:100518131|ssc:100135665|ssc:399522|ssc:100312976|ssc:100037990|ssc:594852|ssc:808513|ssc:397086|	100513348|397094|100518131|100135665|399522|100312976|100037990|594852|808513|397086|	EIF2AK3|IL1A, IL-1alpha|PIK3CD|RELA|IL6R, IL-6Ralpha|NDUFAB1|COX7C, COX7C1|BID|CYTB|TNF, TNFa|	http://www.genome.jp/kegg-bin/show_pathway?ssc04932/ssc:100518131%09red/ssc:808513%09red/ssc:100312976%09red/ssc:397086%09red/ssc:397094%09red/ssc:100513348%09red/ssc:100135665%09red/ssc:100037990%09red/ssc:594852%09red/ssc:399522%09red
MAPK signaling pathway	KEGG PATHWAY	ssc04010	15	249	0.35764	0.999375	ENSSSCG00000023063|ENSSSCG00000008090|ENSSSCG00000008881|ENSSSCG00000012981|ENSSSCG00000023368|ENSSSCG00000015815|ENSSSCG00000011843|ENSSSCG00000002282|ENSSSCG00000004110|ENSSSCG00000008478|ENSSSCG00000003140|ENSSSCG00000001404|ENSSSCG00000010301|ENSSSCG00000005965|ENSSSCG00000001509	ssc:100620494|ssc:397094|ssc:100517409|ssc:100135665|ssc:100517317|ssc:100153248|ssc:100511837|ssc:100517170|ssc:100156182|ssc:100520187|ssc:100302504|ssc:397086|ssc:396603|ssc:448810|ssc:100524813|	100620494|397094|100517409|100135665|100517317|100153248|100511837|100517170|100156182|100520187|100302504|397086|396603|448810|100524813|	|IL1A, IL-1alpha|RAPGEF2|RELA| |FGFR1|PAK2|MAX|TAB2| |FGF21|TNF, TNFa|PPP3CB|MYC|DAXX|	http://www.genome.jp/kegg-bin/show_pathway?ssc04010/ssc:448810%09red/ssc:100511837%09red/ssc:397086%09red/ssc:100156182%09red/ssc:100620494%09red/ssc:396603%09red/ssc:397094%09red/ssc:100135665%09red/ssc:100153248%09red/ssc:100517409%09red/ssc:100517170%09red/ssc:100520187%09red/ssc:100302504%09red/ssc:100524813%09red/ssc:100517317%09red
Pertussis	KEGG PATHWAY	ssc05133	5	73	0.359278	0.999375	ENSSSCG00000011251|ENSSSCG00000028711|ENSSSCG00000001404|ENSSSCG00000012981|ENSSSCG00000008090	ssc:396646|ssc:397319|ssc:397086|ssc:100135665|ssc:397094|	396646|397319|397086|100135665|397094|	MYD88|CASP1|TNF, TNFa|RELA|IL1A, IL-1alpha|	http://www.genome.jp/kegg-bin/show_pathway?ssc05133/ssc:100135665%09red/ssc:397319%09red/ssc:397086%09red/ssc:397094%09red/ssc:396646%09red
Glyoxylate and dicarboxylate metabolism	KEGG PATHWAY	ssc00630	2	23	0.362519	0.999375	ENSSSCG00000023807|ENSSSCG00000004846	ssc:100628006|ssc:100037986|	100628006|100037986|	ACO1|MCEE|	http://www.genome.jp/kegg-bin/show_pathway?ssc00630/ssc:100037986%09red/ssc:100628006%09red
Phagosome	KEGG PATHWAY	ssc04145	9	147	0.390477	0.999375	ENSSSCG00000001341|ENSSSCG00000017401|ENSSSCG00000007585|ENSSSCG00000002538|ENSSSCG00000020893|ENSSSCG00000006678|ENSSSCG00000025173|ENSSSCG00000028355|ENSSSCG00000006054	ssc:100135031|ssc:100523018|ssc:414396|ssc:100037291|ssc:733649|ssc:613130|ssc:733650|ssc:397653|ssc:100154942|	100135031|100523018|414396|100037291|733649|613130|733650|397653|100154942|	SLA-2, SLA-B|ATP6V0A1|ACTB|DYNC1H1|TAP1|FCGR1A|TAP2|ACTB|ATP6V1C1|	http://www.genome.jp/kegg-bin/show_pathway?ssc04145/ssc:100154942%09red/ssc:733649%09red/ssc:414396%09red/ssc:100037291%09red/ssc:100135031%09red/ssc:733650%09red/ssc:100523018%09red/ssc:613130%09red/ssc:397653%09red
Type I diabetes mellitus	KEGG PATHWAY	ssc04940	3	42	0.398895	0.999375	ENSSSCG00000008090|ENSSSCG00000001341|ENSSSCG00000001404	ssc:397094|ssc:100135031|ssc:397086|	397094|100135031|397086|	IL1A, IL-1alpha|SLA-2, SLA-B|TNF, TNFa|	http://www.genome.jp/kegg-bin/show_pathway?ssc04940/ssc:100135031%09red/ssc:397086%09red/ssc:397094%09red
Chemical carcinogenesis	KEGG PATHWAY	ssc05204	4	60	0.406353	0.999375	ENSSSCG00000023320|ENSSSCG00000010491|ENSSSCG00000021395|ENSSSCG00000026798	ssc:100144468|ssc:403111|ssc:100126281|ssc:403111|	100144468|403111|100126281|403111|	CYP3A22|CYP2C42|CYP3A46, CYP3A88|CYP2C42|	http://www.genome.jp/kegg-bin/show_pathway?ssc05204/ssc:100126281%09red/ssc:403111%09red/ssc:100144468%09red
ABC transporters	KEGG PATHWAY	ssc02010	3	43	0.412648	0.999375	ENSSSCG00000025173|ENSSSCG00000002362|ENSSSCG00000020893	ssc:733650|ssc:100152503|ssc:733649|	733650|100152503|733649|	TAP2| |TAP1|	http://www.genome.jp/kegg-bin/show_pathway?ssc02010/ssc:100152503%09red/ssc:733650%09red/ssc:733649%09red
Collecting duct acid secretion	KEGG PATHWAY	ssc04966	2	26	0.417006	0.999375	ENSSSCG00000017401|ENSSSCG00000006054	ssc:100523018|ssc:100154942|	100523018|100154942|	ATP6V0A1|ATP6V1C1|	http://www.genome.jp/kegg-bin/show_pathway?ssc04966/ssc:100523018%09red/ssc:100154942%09red
Glioma	KEGG PATHWAY	ssc05214	4	61	0.417859	0.999375	ENSSSCG00000003395|ENSSSCG00000003413|ENSSSCG00000008478|ENSSSCG00000009123	ssc:100518131|ssc:100127359|ssc:100520187|ssc:397674|	100518131|100127359|100520187|397674|	PIK3CD|MTOR, FRAP1| |CAMK2D|	http://www.genome.jp/kegg-bin/show_pathway?ssc05214/ssc:100518131%09red/ssc:397674%09red/ssc:100520187%09red/ssc:100127359%09red
Phosphatidylinositol signaling system	KEGG PATHWAY	ssc04070	5	79	0.420041	0.999375	ENSSSCG00000027340|ENSSSCG00000000555|ENSSSCG00000003395|ENSSSCG00000016050|ENSSSCG00000010092	ssc:100623115|ssc:100155015|ssc:100518131|ssc:100514878|ssc:100157143|	100623115|100155015|100518131|100514878|100157143|	PI4K2B|ITPR3|PIK3CD|INPP1|PI4KA|	http://www.genome.jp/kegg-bin/show_pathway?ssc04070/ssc:100518131%09red/ssc:100514878%09red/ssc:100157143%09red/ssc:100623115%09red/ssc:100155015%09red
Lysosome	KEGG PATHWAY	ssc04142	7	115	0.420772	0.999375	ENSSSCG00000017087|ENSSSCG00000014058|ENSSSCG00000012142|ENSSSCG00000025932|ENSSSCG00000017401|ENSSSCG00000023080|ENSSSCG00000003707	ssc:100515283|ssc:100525860|ssc:100517795|ssc:100627432|ssc:100523018|ssc:100623352|ssc:397591|	100515283|100525860|100517795|100627432|100523018|100623352|397591|	GM2A|CLTB|AP1S2| |ATP6V0A1|TPP1|NPC1|	http://www.genome.jp/kegg-bin/show_pathway?ssc04142/ssc:100627432%09red/ssc:100525860%09red/ssc:100515283%09red/ssc:100523018%09red/ssc:397591%09red/ssc:100623352%09red/ssc:100517795%09red
Estrogen signaling pathway	KEGG PATHWAY	ssc04915	6	97	0.420795	0.999375	ENSSSCG00000003395|ENSSSCG00000001549|ENSSSCG00000027558|ENSSSCG00000008478|ENSSSCG00000000555|ENSSSCG00000023503	ssc:100518131|ssc:100155423|ssc:100511175|ssc:100520187|ssc:100155015|ssc:100622955|	100518131|100155423|100511175|100520187|100155015|100622955|	PIK3CD|FKBP5|GABBR2| |ITPR3|PRKCD|	http://www.genome.jp/kegg-bin/show_pathway?ssc04915/ssc:100518131%09red/ssc:100155015%09red/ssc:100511175%09red/ssc:100622955%09red/ssc:100155423%09red/ssc:100520187%09red
Rap1 signaling pathway	KEGG PATHWAY	ssc04015	12	208	0.434946	0.999375	ENSSSCG00000003395|ENSSSCG00000002332|ENSSSCG00000030156|ENSSSCG00000017006|ENSSSCG00000013174|ENSSSCG00000008881|ENSSSCG00000007585|ENSSSCG00000003140|ENSSSCG00000005317|ENSSSCG00000015815|ENSSSCG00000005738|ENSSSCG00000028355	ssc:100518131|ssc:100157762|ssc:100514179|ssc:100511843|ssc:100519699|ssc:100517409|ssc:414396|ssc:100302504|ssc:100157220|ssc:100153248|ssc:100513970|ssc:397653|	100518131|100157762|100514179|100511843|100519699|100517409|414396|100302504|100157220|100153248|100513970|397653|	PIK3CD|SIPA1L1|APBB1IP|LCP2|CTNND1|RAPGEF2|ACTB|FGF21|TLN1, talin-1|FGFR1|RALGDS|ACTB|	http://www.genome.jp/kegg-bin/show_pathway?ssc04015/ssc:100518131%09red/ssc:100514179%09red/ssc:414396%09red/ssc:100517409%09red/ssc:100513970%09red/ssc:100519699%09red/ssc:397653%09red/ssc:100511843%09red/ssc:100153248%09red/ssc:100157220%09red/ssc:100157762%09red/ssc:100302504%09red
Huntington's disease	KEGG PATHWAY	ssc05016	11	190	0.437003	0.999375	ENSSSCG00000014058|ENSSSCG00000003199|ENSSSCG00000010795|ENSSSCG00000014145|ENSSSCG00000018094|ENSSSCG00000007026|ENSSSCG00000028278|ENSSSCG00000000068|ENSSSCG00000001880|ENSSSCG00000008697|ENSSSCG00000024694	ssc:100525860|ssc:100520250|ssc:100312976|ssc:100037990|ssc:808513|ssc:397651|ssc:100737040|ssc:100156226|ssc:100621221|ssc:397014|ssc:100626452|	100525860|100520250|100312976|100037990|808513|397651|100737040|100156226|100621221|397014|100626452|	CLTB|AP2A1|NDUFAB1|COX7C, COX7C1|CYTB|VDAC1P5, VDAC3, VDAC5P|POLR2A|EP300|SIN3A|HDH|TAF4|	http://www.genome.jp/kegg-bin/show_pathway?ssc05016/ssc:100737040%09red/ssc:808513%09red/ssc:100312976%09red/ssc:100525860%09red/ssc:100626452%09red/ssc:100156226%09red/ssc:100037990%09red/ssc:397014%09red/ssc:397651%09red/ssc:100520250%09red/ssc:100621221%09red
Fc gamma R-mediated phagocytosis	KEGG PATHWAY	ssc04666	5	81	0.440119	0.999375	ENSSSCG00000009821|ENSSSCG00000023503|ENSSSCG00000006678|ENSSSCG00000003395|ENSSSCG00000006250	ssc:100154518|ssc:100622955|ssc:613130|ssc:100518131|ssc:100152890|	100154518|100622955|613130|100518131|100152890|	ARPC3|PRKCD|FCGR1A|PIK3CD|LYN|	http://www.genome.jp/kegg-bin/show_pathway?ssc04666/ssc:100518131%09red/ssc:100152890%09red/ssc:100622955%09red/ssc:613130%09red/ssc:100154518%09red
Biosynthesis of amino acids	KEGG PATHWAY	ssc01230	4	63	0.440704	0.999375	ENSSSCG00000012440|ENSSSCG00000023807|ENSSSCG00000010855|ENSSSCG00000008207	ssc:407608|ssc:100628006|ssc:100524702|ssc:100038014|	407608|100628006|100524702|100038014|	PGK1|ACO1|PYCR2|RPIA|	http://www.genome.jp/kegg-bin/show_pathway?ssc01230/ssc:407608%09red/ssc:100038014%09red/ssc:100524702%09red/ssc:100628006%09red
Viral myocarditis	KEGG PATHWAY	ssc05416	4	63	0.440704	0.999375	ENSSSCG00000000769|ENSSSCG00000001341|ENSSSCG00000028355|ENSSSCG00000007585	ssc:594852|ssc:100135031|ssc:397653|ssc:414396|	594852|100135031|397653|414396|	BID|SLA-2, SLA-B|ACTB|ACTB|	http://www.genome.jp/kegg-bin/show_pathway?ssc05416/ssc:414396%09red/ssc:397653%09red/ssc:594852%09red/ssc:100135031%09red
Neurotrophin signaling pathway	KEGG PATHWAY	ssc04722	7	118	0.445699	0.999375	ENSSSCG00000012981|ENSSSCG00000003395|ENSSSCG00000009123|ENSSSCG00000009833|ENSSSCG00000001952|ENSSSCG00000008478|ENSSSCG00000023503	ssc:100135665|ssc:100518131|ssc:397674|ssc:100154922|ssc:406188|ssc:100520187|ssc:100622955|	100135665|100518131|397674|100154922|406188|100520187|100622955|	RELA|PIK3CD|CAMK2D|SH2B3|NFKBIA, ECI-6/IKBA, IKBA| |PRKCD|	http://www.genome.jp/kegg-bin/show_pathway?ssc04722/ssc:100518131%09red/ssc:406188%09red/ssc:100135665%09red/ssc:100154922%09red/ssc:397674%09red/ssc:100622955%09red/ssc:100520187%09red
Renal cell carcinoma	KEGG PATHWAY	ssc05211	4	64	0.452029	0.999375	ENSSSCG00000000068|ENSSSCG00000003395|ENSSSCG00000011843|ENSSSCG00000008478	ssc:100156226|ssc:100518131|ssc:100511837|ssc:100520187|	100156226|100518131|100511837|100520187|	EP300|PIK3CD|PAK2| |	http://www.genome.jp/kegg-bin/show_pathway?ssc05211/ssc:100511837%09red/ssc:100156226%09red/ssc:100520187%09red/ssc:100518131%09red
Valine, leucine and isoleucine degradation	KEGG PATHWAY	ssc00280	3	46	0.453253	0.999375	ENSSSCG00000025942|ENSSSCG00000015443|ENSSSCG00000004846	ssc:100624482|ssc:397129|ssc:100037986|	100624482|397129|100037986|	MCCC1|DLD, DLDH|MCEE|	http://www.genome.jp/kegg-bin/show_pathway?ssc00280/ssc:397129%09red/ssc:100624482%09red/ssc:100037986%09red
Alzheimer's disease	KEGG PATHWAY	ssc05010	10	175	0.459597	0.999375	ENSSSCG00000008208|ENSSSCG00000000555|ENSSSCG00000027344|ENSSSCG00000010795|ENSSSCG00000023150|ENSSSCG00000000769|ENSSSCG00000001404|ENSSSCG00000018094|ENSSSCG00000010301|ENSSSCG00000014145	ssc:100513348|ssc:100155015|ssc:396875|ssc:100312976|ssc:100514839|ssc:594852|ssc:397086|ssc:808513|ssc:396603|ssc:100037990|	100513348|100155015|396875|100312976|100514839|594852|397086|808513|396603|100037990|	EIF2AK3|ITPR3|ATP2A2, ATP2, SERCA2|NDUFAB1| |BID|TNF, TNFa|CYTB|PPP3CB|COX7C, COX7C1|	http://www.genome.jp/kegg-bin/show_pathway?ssc05010/ssc:100155015%09red/ssc:808513%09red/ssc:100312976%09red/ssc:396603%09red/ssc:397086%09red/ssc:100513348%09red/ssc:100037990%09red/ssc:396875%09red/ssc:594852%09red/ssc:100514839%09red
Systemic lupus erythematosus	KEGG PATHWAY	ssc05322	6	102	0.465872	0.999375	ENSSSCG00000009178|ENSSSCG00000014780|ENSSSCG00000001404|ENSSSCG00000006678|ENSSSCG00000015938|ENSSSCG00000017202	ssc:100141311|ssc:100302538|ssc:397086|ssc:613130|ssc:100152189|ssc:396970|	100141311|100302538|397086|613130|100152189|396970|	H2AFZ, H2A.Z, H2A.Z-1|TRIM21|TNF, TNFa|FCGR1A|SSB|H3F3A|	http://www.genome.jp/kegg-bin/show_pathway?ssc05322/ssc:100152189%09red/ssc:100141311%09red/ssc:397086%09red/ssc:613130%09red/ssc:100302538%09red/ssc:396970%09red
Citrate cycle (TCA cycle)	KEGG PATHWAY	ssc00020	2	30	0.485755	0.999375	ENSSSCG00000023807|ENSSSCG00000015443	ssc:100628006|ssc:397129|	100628006|397129|	ACO1|DLD, DLDH|	http://www.genome.jp/kegg-bin/show_pathway?ssc00020/ssc:397129%09red/ssc:100628006%09red
Colorectal cancer	KEGG PATHWAY	ssc05210	4	68	0.496501	0.999375	ENSSSCG00000010638|ENSSSCG00000005738|ENSSSCG00000003395|ENSSSCG00000005965	ssc:100153922|ssc:100513970|ssc:100518131|ssc:448810|	100153922|100513970|100518131|448810|	TCF7L2|RALGDS|PIK3CD|MYC|	http://www.genome.jp/kegg-bin/show_pathway?ssc05210/ssc:448810%09red/ssc:100518131%09red/ssc:100513970%09red/ssc:100153922%09red
Long-term potentiation	KEGG PATHWAY	ssc04720	4	68	0.496501	0.999375	ENSSSCG00000000068|ENSSSCG00000010301|ENSSSCG00000009123|ENSSSCG00000000555	ssc:100156226|ssc:396603|ssc:397674|ssc:100155015|	100156226|396603|397674|100155015|	EP300|PPP3CB|CAMK2D|ITPR3|	http://www.genome.jp/kegg-bin/show_pathway?ssc04720/ssc:100155015%09red/ssc:100156226%09red/ssc:396603%09red/ssc:397674%09red
Non-homologous end-joining	KEGG PATHWAY	ssc03450	1	13	0.516196	0.999375	ENSSSCG00000010505	ssc:100518694|	100518694|	DNTT|	http://www.genome.jp/kegg-bin/show_pathway?ssc03450/ssc:100518694%09red
Folate biosynthesis	KEGG PATHWAY	ssc00790	1	13	0.516196	0.999375	ENSSSCG00000001596	ssc:100154835|	100154835|	MOCS1|	http://www.genome.jp/kegg-bin/show_pathway?ssc00790/ssc:100154835%09red
Base excision repair	KEGG PATHWAY	ssc03410	2	32	0.518187	0.999375	ENSSSCG00000005478|ENSSSCG00000024221	ssc:100517450|ssc:100153912|	100517450|100153912|	POLE3|SMUG1|	http://www.genome.jp/kegg-bin/show_pathway?ssc03410/ssc:100153912%09red/ssc:100517450%09red
Chagas disease (American trypanosomiasis)	KEGG PATHWAY	ssc05142	6	108	0.518629	0.999375	ENSSSCG00000012981|ENSSSCG00000003395|ENSSSCG00000001952|ENSSSCG00000009657|ENSSSCG00000011251|ENSSSCG00000001404	ssc:100135665|ssc:100518131|ssc:406188|ssc:397090|ssc:396646|ssc:397086|	100135665|100518131|406188|397090|396646|397086|	RELA|PIK3CD|NFKBIA, ECI-6/IKBA, IKBA|PPP2R2A|MYD88|TNF, TNFa|	http://www.genome.jp/kegg-bin/show_pathway?ssc05142/ssc:100518131%09red/ssc:397090%09red/ssc:397086%09red/ssc:100135665%09red/ssc:396646%09red/ssc:406188%09red
Ras signaling pathway	KEGG PATHWAY	ssc04014	12	223	0.527003	0.999375	ENSSSCG00000008388|ENSSSCG00000003395|ENSSSCG00000007669|ENSSSCG00000015519|ENSSSCG00000015563|ENSSSCG00000015815|ENSSSCG00000011843|ENSSSCG00000023368|ENSSSCG00000008478|ENSSSCG00000012981|ENSSSCG00000003140|ENSSSCG00000005738	ssc:100525104|ssc:100518131|ssc:100516546|ssc:100522392|ssc:100515847|ssc:100153248|ssc:100511837|ssc:100517317|ssc:100520187|ssc:100135665|ssc:100302504|ssc:100513970|	100525104|100518131|100516546|100522392|100515847|100153248|100511837|100517317|100520187|100135665|100302504|100513970|	REL|PIK3CD|GNB2|RASAL2|RGL1|FGFR1|PAK2| | |RELA|FGF21|RALGDS|	http://www.genome.jp/kegg-bin/show_pathway?ssc04014/ssc:100511837%09red/ssc:100518131%09red/ssc:100513970%09red/ssc:100515847%09red/ssc:100525104%09red/ssc:100135665%09red/ssc:100516546%09red/ssc:100153248%09red/ssc:100520187%09red/ssc:100302504%09red/ssc:100522392%09red/ssc:100517317%09red
Non-small cell lung cancer	KEGG PATHWAY	ssc05223	3	52	0.530574	0.999375	ENSSSCG00000003395|ENSSSCG00000008478|ENSSSCG00000023368	ssc:100518131|ssc:100520187|ssc:100517317|	100518131|100520187|100517317|	PIK3CD| | |	http://www.genome.jp/kegg-bin/show_pathway?ssc05223/ssc:100518131%09red/ssc:100520187%09red/ssc:100517317%09red
Inflammatory mediator regulation of TRP channels	KEGG PATHWAY	ssc04750	6	110	0.535767	0.999375	ENSSSCG00000003395|ENSSSCG00000009123|ENSSSCG00000010491|ENSSSCG00000000555|ENSSSCG00000023503|ENSSSCG00000026798	ssc:100518131|ssc:397674|ssc:403111|ssc:100155015|ssc:100622955|ssc:403111|	100518131|397674|403111|100155015|100622955|403111|	PIK3CD|CAMK2D|CYP2C42|ITPR3|PRKCD|CYP2C42|	http://www.genome.jp/kegg-bin/show_pathway?ssc04750/ssc:100518131%09red/ssc:100155015%09red/ssc:100622955%09red/ssc:403111%09red/ssc:397674%09red
African trypanosomiasis	KEGG PATHWAY	ssc05143	2	34	0.549225	0.999375	ENSSSCG00000011251|ENSSSCG00000001404	ssc:396646|ssc:397086|	396646|397086|	MYD88|TNF, TNFa|	http://www.genome.jp/kegg-bin/show_pathway?ssc05143/ssc:397086%09red/ssc:396646%09red
RNA polymerase	KEGG PATHWAY	ssc03020	2	34	0.549225	0.999375	ENSSSCG00000025298|ENSSSCG00000028278	ssc:100626323|ssc:100737040|	100626323|100737040|	|POLR2A|	http://www.genome.jp/kegg-bin/show_pathway?ssc03020/ssc:100737040%09red/ssc:100626323%09red
p53 signaling pathway	KEGG PATHWAY	ssc04115	4	73	0.549781	0.999375	ENSSSCG00000000769|ENSSSCG00000011357|ENSSSCG00000015509|ENSSSCG00000029438	ssc:594852|ssc:100154430|ssc:100520856|ssc:100620966|	594852|100154430|100520856|100620966|	BID| |RFWD2|SESN2|	http://www.genome.jp/kegg-bin/show_pathway?ssc04115/ssc:100154430%09red/ssc:100620966%09red/ssc:100520856%09red/ssc:594852%09red
Malaria	KEGG PATHWAY	ssc05144	3	54	0.554957	0.999375	ENSSSCG00000011251|ENSSSCG00000001404|ENSSSCG00000023150	ssc:396646|ssc:397086|ssc:100514839|	396646|397086|100514839|	MYD88|TNF, TNFa| |	http://www.genome.jp/kegg-bin/show_pathway?ssc05144/ssc:397086%09red/ssc:100514839%09red/ssc:396646%09red
Gastric acid secretion	KEGG PATHWAY	ssc04971	4	74	0.560079	0.999375	ENSSSCG00000000555|ENSSSCG00000006740|ENSSSCG00000009123|ENSSSCG00000012066	ssc:100155015|ssc:397481|ssc:397674|ssc:100152071|	100155015|397481|397674|100152071|	ITPR3|ATP1A1|CAMK2D|KCNJ15|	http://www.genome.jp/kegg-bin/show_pathway?ssc04971/ssc:100155015%09red/ssc:397674%09red/ssc:100152071%09red/ssc:397481%09red
TGF-beta signaling pathway	KEGG PATHWAY	ssc04350	4	74	0.560079	0.999375	ENSSSCG00000000068|ENSSSCG00000001404|ENSSSCG00000005965|ENSSSCG00000021865	ssc:100156226|ssc:397086|ssc:448810|ssc:397093|	100156226|397086|448810|397093|	EP300|TNF, TNFa|MYC|INHBA|	http://www.genome.jp/kegg-bin/show_pathway?ssc04350/ssc:448810%09red/ssc:100156226%09red/ssc:397093%09red/ssc:397086%09red
Insulin signaling pathway	KEGG PATHWAY	ssc04910	7	133	0.56579	0.999375	ENSSSCG00000003395|ENSSSCG00000008478|ENSSSCG00000008439|ENSSSCG00000015115|ENSSSCG00000003413|ENSSSCG00000022486|ENSSSCG00000011363	ssc:100518131|ssc:100520187|ssc:100523840|ssc:100518854|ssc:100127359|ssc:100621690|ssc:397493|	100518131|100520187|100523840|100518854|100127359|100621690|397493|	PIK3CD| |RHOQ|CBL|MTOR, FRAP1|CBLB|PRKAR2A|	http://www.genome.jp/kegg-bin/show_pathway?ssc04910/ssc:100518131%09red/ssc:100523840%09red/ssc:100621690%09red/ssc:100518854%09red/ssc:100127359%09red/ssc:100520187%09red/ssc:397493%09red
HTLV-I infection	KEGG PATHWAY	ssc05166	13	253	0.589166	0.999375	ENSSSCG00000012981|ENSSSCG00000003395|ENSSSCG00000001341|ENSSSCG00000005317|ENSSSCG00000017414|ENSSSCG00000010224|ENSSSCG00000001952|ENSSSCG00000005478|ENSSSCG00000007026|ENSSSCG00000001404|ENSSSCG00000000068|ENSSSCG00000010301|ENSSSCG00000005965	ssc:100135665|ssc:100518131|ssc:100135031|ssc:100157220|ssc:100524215|ssc:100038004|ssc:406188|ssc:100517450|ssc:397651|ssc:397086|ssc:100156226|ssc:396603|ssc:448810|	100135665|100518131|100135031|100157220|100524215|100038004|406188|100517450|397651|397086|100156226|396603|448810|	RELA|PIK3CD|SLA-2, SLA-B|TLN1, talin-1|KAT2A|EGR2|NFKBIA, ECI-6/IKBA, IKBA|POLE3|VDAC1P5, VDAC3, VDAC5P|TNF, TNFa|EP300|PPP3CB|MYC|	http://www.genome.jp/kegg-bin/show_pathway?ssc05166/ssc:448810%09red/ssc:100518131%09red/ssc:100038004%09red/ssc:100135665%09red/ssc:397086%09red/ssc:396603%09red/ssc:100156226%09red/ssc:100517450%09red/ssc:100157220%09red/ssc:100135031%09red/ssc:397651%09red/ssc:406188%09red/ssc:100524215%09red
AMPK signaling pathway	KEGG PATHWAY	ssc04152	6	118	0.60147	0.999375	ENSSSCG00000010235|ENSSSCG00000003395|ENSSSCG00000008774|ENSSSCG00000009657|ENSSSCG00000003413|ENSSSCG00000007839	ssc:751859|ssc:100518131|ssc:100524447|ssc:397090|ssc:100127359|ssc:100523723|	751859|100518131|100524447|397090|100127359|100523723|	SIRT1|PIK3CD| |PPP2R2A|MTOR, FRAP1|EEF2K|	http://www.genome.jp/kegg-bin/show_pathway?ssc04152/ssc:100518131%09red/ssc:100524447%09red/ssc:100523723%09red/ssc:751859%09red/ssc:100127359%09red/ssc:397090%09red
Glycosaminoglycan biosynthesis - keratan sulfate	KEGG PATHWAY	ssc00533	1	17	0.606866	0.999375	ENSSSCG00000010998	ssc:100511655|	100511655|	B4GALT1|	http://www.genome.jp/kegg-bin/show_pathway?ssc00533/ssc:100511655%09red
Allograft rejection	KEGG PATHWAY	ssc05330	2	38	0.606979	0.999375	ENSSSCG00000001404|ENSSSCG00000001341	ssc:397086|ssc:100135031|	397086|100135031|	TNF, TNFa|SLA-2, SLA-B|	http://www.genome.jp/kegg-bin/show_pathway?ssc05330/ssc:100135031%09red/ssc:397086%09red
Carbon metabolism	KEGG PATHWAY	ssc01200	5	99	0.608878	0.999375	ENSSSCG00000012440|ENSSSCG00000023807|ENSSSCG00000015443|ENSSSCG00000004846|ENSSSCG00000008207	ssc:407608|ssc:100628006|ssc:397129|ssc:100037986|ssc:100038014|	407608|100628006|397129|100037986|100038014|	PGK1|ACO1|DLD, DLDH|MCEE|RPIA|	http://www.genome.jp/kegg-bin/show_pathway?ssc01200/ssc:397129%09red/ssc:407608%09red/ssc:100037986%09red/ssc:100038014%09red/ssc:100628006%09red
Leukocyte transendothelial migration	KEGG PATHWAY	ssc04670	6	119	0.609324	0.999375	ENSSSCG00000003395|ENSSSCG00000013174|ENSSSCG00000003107|ENSSSCG00000007585|ENSSSCG00000015122|ENSSSCG00000028355	ssc:100518131|ssc:100519699|ssc:100514580|ssc:414396|ssc:100271931|ssc:397653|	100518131|100519699|100514580|414396|100271931|397653|	PIK3CD|CTNND1| |ACTB|THY1, CD90|ACTB|	http://www.genome.jp/kegg-bin/show_pathway?ssc04670/ssc:100518131%09red/ssc:100271931%09red/ssc:100514580%09red/ssc:414396%09red/ssc:100519699%09red/ssc:397653%09red
Regulation of actin cytoskeleton	KEGG PATHWAY	ssc04810	10	198	0.609379	0.999375	ENSSSCG00000003395|ENSSSCG00000017054|ENSSSCG00000015815|ENSSSCG00000011843|ENSSSCG00000003107|ENSSSCG00000007585|ENSSSCG00000009821|ENSSSCG00000008478|ENSSSCG00000003140|ENSSSCG00000028355	ssc:100518131|ssc:100523290|ssc:100153248|ssc:100511837|ssc:100514580|ssc:414396|ssc:100154518|ssc:100520187|ssc:100302504|ssc:397653|	100518131|100523290|100153248|100511837|100514580|414396|100154518|100520187|100302504|397653|	PIK3CD|CYFIP2|FGFR1|PAK2| |ACTB|ARPC3| |FGF21|ACTB|	http://www.genome.jp/kegg-bin/show_pathway?ssc04810/ssc:100511837%09red/ssc:100518131%09red/ssc:100153248%09red/ssc:414396%09red/ssc:100514580%09red/ssc:397653%09red/ssc:100523290%09red/ssc:100520187%09red/ssc:100302504%09red/ssc:100154518%09red
mTOR signaling pathway	KEGG PATHWAY	ssc04150	3	60	0.623346	0.999375	ENSSSCG00000001404|ENSSSCG00000003395|ENSSSCG00000003413	ssc:397086|ssc:100518131|ssc:100127359|	397086|100518131|100127359|	TNF, TNFa|PIK3CD|MTOR, FRAP1|	http://www.genome.jp/kegg-bin/show_pathway?ssc04150/ssc:100518131%09red/ssc:397086%09red/ssc:100127359%09red
2-Oxocarboxylic acid metabolism	KEGG PATHWAY	ssc01210	1	18	0.626745	0.999375	ENSSSCG00000023807	ssc:100628006|	100628006|	ACO1|	http://www.genome.jp/kegg-bin/show_pathway?ssc01210/ssc:100628006%09red
One carbon pool by folate	KEGG PATHWAY	ssc00670	1	18	0.626745	0.999375	ENSSSCG00000000839	ssc:100151976|	100151976|	ALDH1L2|	http://www.genome.jp/kegg-bin/show_pathway?ssc00670/ssc:100151976%09red
Aldosterone-regulated sodium reabsorption	KEGG PATHWAY	ssc04960	2	41	0.646482	0.999375	ENSSSCG00000003395|ENSSSCG00000006740	ssc:100518131|ssc:397481|	100518131|397481|	PIK3CD|ATP1A1|	http://www.genome.jp/kegg-bin/show_pathway?ssc04960/ssc:100518131%09red/ssc:397481%09red
Mineral absorption	KEGG PATHWAY	ssc04978	2	42	0.658931	0.999375	ENSSSCG00000026759|ENSSSCG00000006740	ssc:445512|ssc:397481|	445512|397481|	HMOX1, HSP32|ATP1A1|	http://www.genome.jp/kegg-bin/show_pathway?ssc04978/ssc:445512%09red/ssc:397481%09red
Carbohydrate digestion and absorption	KEGG PATHWAY	ssc04973	2	42	0.658931	0.999375	ENSSSCG00000003395|ENSSSCG00000006740	ssc:100518131|ssc:397481|	100518131|397481|	PIK3CD|ATP1A1|	http://www.genome.jp/kegg-bin/show_pathway?ssc04973/ssc:100518131%09red/ssc:397481%09red
Basal transcription factors	KEGG PATHWAY	ssc03022	2	42	0.658931	0.999375	ENSSSCG00000022421|ENSSSCG00000024694	ssc:100626869|ssc:100626452|	100626869|100626452|	GTF2F2|TAF4|	http://www.genome.jp/kegg-bin/show_pathway?ssc03022/ssc:100626452%09red/ssc:100626869%09red
Renin-angiotensin system	KEGG PATHWAY	ssc04614	1	20	0.663539	0.999375	ENSSSCG00000001849	ssc:397520|	397520|	ANPEP, APN, PEPN|	http://www.genome.jp/kegg-bin/show_pathway?ssc04614/ssc:397520%09red
Amoebiasis	KEGG PATHWAY	ssc05146	5	107	0.673703	0.999375	ENSSSCG00000001404|ENSSSCG00000003395|ENSSSCG00000015618|ENSSSCG00000009545|ENSSSCG00000012981	ssc:397086|ssc:100518131|ssc:100513489|ssc:100153454|ssc:100135665|	397086|100518131|100513489|100153454|100135665|	TNF, TNFa|PIK3CD|LAMB3|COL4A2|RELA|	http://www.genome.jp/kegg-bin/show_pathway?ssc05146/ssc:100518131%09red/ssc:100135665%09red/ssc:100153454%09red/ssc:397086%09red/ssc:100513489%09red
Amphetamine addiction	KEGG PATHWAY	ssc05031	3	65	0.674573	0.999375	ENSSSCG00000010235|ENSSSCG00000009123|ENSSSCG00000010301	ssc:751859|ssc:397674|ssc:396603|	751859|397674|396603|	SIRT1|CAMK2D|PPP3CB|	http://www.genome.jp/kegg-bin/show_pathway?ssc05031/ssc:397674%09red/ssc:751859%09red/ssc:396603%09red
Wnt signaling pathway	KEGG PATHWAY	ssc04310	6	128	0.675961	0.999375	ENSSSCG00000010638|ENSSSCG00000009123|ENSSSCG00000000068|ENSSSCG00000010301|ENSSSCG00000001414|ENSSSCG00000005965	ssc:100153922|ssc:397674|ssc:100156226|ssc:396603|ssc:397211|ssc:448810|	100153922|397674|100156226|396603|397211|448810|	TCF7L2|CAMK2D|EP300|PPP3CB|CSNK2B, CK2N, CKII_beta|MYC|	http://www.genome.jp/kegg-bin/show_pathway?ssc04310/ssc:448810%09red/ssc:397211%09red/ssc:396603%09red/ssc:100156226%09red/ssc:397674%09red/ssc:100153922%09red
Rheumatoid arthritis	KEGG PATHWAY	ssc05323	4	87	0.68121	0.999375	ENSSSCG00000008090|ENSSSCG00000006054|ENSSSCG00000017401|ENSSSCG00000001404	ssc:397094|ssc:100154942|ssc:100523018|ssc:397086|	397094|100154942|100523018|397086|	IL1A, IL-1alpha|ATP6V1C1|ATP6V0A1|TNF, TNFa|	http://www.genome.jp/kegg-bin/show_pathway?ssc05323/ssc:100523018%09red/ssc:100154942%09red/ssc:397086%09red/ssc:397094%09red
Arrhythmogenic right ventricular cardiomyopathy (ARVC)	KEGG PATHWAY	ssc05412	3	67	0.693569	0.999375	ENSSSCG00000010638|ENSSSCG00000028355|ENSSSCG00000007585	ssc:100153922|ssc:397653|ssc:414396|	100153922|397653|414396|	TCF7L2|ACTB|ACTB|	http://www.genome.jp/kegg-bin/show_pathway?ssc05412/ssc:414396%09red/ssc:397653%09red/ssc:100153922%09red
Proximal tubule bicarbonate reclamation	KEGG PATHWAY	ssc04964	1	22	0.69671	0.999375	ENSSSCG00000006740	ssc:397481|	397481|	ATP1A1|	http://www.genome.jp/kegg-bin/show_pathway?ssc04964/ssc:397481%09red
Focal adhesion	KEGG PATHWAY	ssc04510	9	194	0.702628	0.999375	ENSSSCG00000003395|ENSSSCG00000028355|ENSSSCG00000015618|ENSSSCG00000005317|ENSSSCG00000011843|ENSSSCG00000003107|ENSSSCG00000007585|ENSSSCG00000008478|ENSSSCG00000009545	ssc:100518131|ssc:397653|ssc:100513489|ssc:100157220|ssc:100511837|ssc:100514580|ssc:414396|ssc:100520187|ssc:100153454|	100518131|397653|100513489|100157220|100511837|100514580|414396|100520187|100153454|	PIK3CD|ACTB|LAMB3|TLN1, talin-1|PAK2| |ACTB| |COL4A2|	http://www.genome.jp/kegg-bin/show_pathway?ssc04510/ssc:100511837%09red/ssc:100518131%09red/ssc:414396%09red/ssc:100514580%09red/ssc:397653%09red/ssc:100157220%09red/ssc:100153454%09red/ssc:100520187%09red/ssc:100513489%09red
Signaling pathways regulating pluripotency of stem cells	KEGG PATHWAY	ssc04550	6	132	0.703106	0.999375	ENSSSCG00000003395|ENSSSCG00000017403|ENSSSCG00000015815|ENSSSCG00000001061|ENSSSCG00000021865|ENSSSCG00000005965	ssc:100518131|ssc:733648|ssc:100153248|ssc:100524569|ssc:397093|ssc:448810|	100518131|733648|100153248|100524569|397093|448810|	PIK3CD|STAT3|FGFR1|JARID2|INHBA|MYC|	http://www.genome.jp/kegg-bin/show_pathway?ssc04550/ssc:448810%09red/ssc:100518131%09red/ssc:733648%09red/ssc:100524569%09red/ssc:397093%09red/ssc:100153248%09red
Melanoma	KEGG PATHWAY	ssc05218	3	69	0.711714	0.999375	ENSSSCG00000003395|ENSSSCG00000015815|ENSSSCG00000003140	ssc:100518131|ssc:100153248|ssc:100302504|	100518131|100153248|100302504|	PIK3CD|FGFR1|FGF21|	http://www.genome.jp/kegg-bin/show_pathway?ssc05218/ssc:100518131%09red/ssc:100302504%09red/ssc:100153248%09red
Bile secretion	KEGG PATHWAY	ssc04976	3	69	0.711714	0.999375	ENSSSCG00000030900|ENSSSCG00000006740|ENSSSCG00000028512	ssc:396801|ssc:397481|ssc:396801|	396801|397481|396801|	LDLR|ATP1A1|LDLR|	http://www.genome.jp/kegg-bin/show_pathway?ssc04976/ssc:396801%09red/ssc:397481%09red
Pentose phosphate pathway	KEGG PATHWAY	ssc00030	1	23	0.712049	0.999375	ENSSSCG00000008207	ssc:100038014|	100038014|	RPIA|	http://www.genome.jp/kegg-bin/show_pathway?ssc00030/ssc:100038014%09red
Staphylococcus aureus infection	KEGG PATHWAY	ssc05150	2	47	0.715949	0.999375	ENSSSCG00000006678|ENSSSCG00000010893	ssc:613130|ssc:397525|	613130|397525|	FCGR1A|CFH, HF1|	http://www.genome.jp/kegg-bin/show_pathway?ssc05150/ssc:397525%09red/ssc:613130%09red
Glycosaminoglycan biosynthesis - heparan sulfate / heparin	KEGG PATHWAY	ssc00534	1	24	0.726612	0.999375	ENSSSCG00000007872	ssc:100514160|	100514160|	XYLT1|	http://www.genome.jp/kegg-bin/show_pathway?ssc00534/ssc:100514160%09red
Asthma	KEGG PATHWAY	ssc05310	1	24	0.726612	0.999375	ENSSSCG00000001404	ssc:397086|	397086|	TNF, TNFa|	http://www.genome.jp/kegg-bin/show_pathway?ssc05310/ssc:397086%09red
Thyroid hormone synthesis	KEGG PATHWAY	ssc04918	3	72	0.737362	0.999375	ENSSSCG00000000555|ENSSSCG00000006740|ENSSSCG00000006733	ssc:100155015|ssc:397481|ssc:100156166|	100155015|397481|100156166|	ITPR3|ATP1A1|TTF2|	http://www.genome.jp/kegg-bin/show_pathway?ssc04918/ssc:100155015%09red/ssc:100156166%09red/ssc:397481%09red
Nicotinate and nicotinamide metabolism	KEGG PATHWAY	ssc00760	1	25	0.74044	0.999375	ENSSSCG00000022912	ssc:100623678|	100623678|	NT5C3A|	http://www.genome.jp/kegg-bin/show_pathway?ssc00760/ssc:100623678%09red
Hippo signaling pathway	KEGG PATHWAY	ssc04390	6	138	0.74086	0.999375	ENSSSCG00000010638|ENSSSCG00000007585|ENSSSCG00000012591|ENSSSCG00000009657|ENSSSCG00000005965|ENSSSCG00000028355	ssc:100153922|ssc:414396|ssc:100158213|ssc:397090|ssc:448810|ssc:397653|	100153922|414396|100158213|397090|448810|397653|	TCF7L2|ACTB|AMOT|PPP2R2A|MYC|ACTB|	http://www.genome.jp/kegg-bin/show_pathway?ssc04390/ssc:448810%09red/ssc:100158213%09red/ssc:414396%09red/ssc:397090%09red/ssc:397653%09red/ssc:100153922%09red
Cardiac muscle contraction	KEGG PATHWAY	ssc04260	3	73	0.745499	0.999375	ENSSSCG00000018094|ENSSSCG00000006740|ENSSSCG00000014145	ssc:808513|ssc:397481|ssc:100037990|	808513|397481|100037990|	CYTB|ATP1A1|COX7C, COX7C1|	http://www.genome.jp/kegg-bin/show_pathway?ssc04260/ssc:808513%09red/ssc:100037990%09red/ssc:397481%09red
Glutathione metabolism	KEGG PATHWAY	ssc00480	2	50	0.746161	0.999375	ENSSSCG00000001849|ENSSSCG00000030525	ssc:397520|ssc:100624445|	397520|100624445|	ANPEP, APN, PEPN| |	http://www.genome.jp/kegg-bin/show_pathway?ssc00480/ssc:100624445%09red/ssc:397520%09red
Oxytocin signaling pathway	KEGG PATHWAY	ssc04921	7	161	0.750415	0.999375	ENSSSCG00000003395|ENSSSCG00000009123|ENSSSCG00000007839|ENSSSCG00000007585|ENSSSCG00000010301|ENSSSCG00000000555|ENSSSCG00000028355	ssc:100518131|ssc:397674|ssc:100523723|ssc:414396|ssc:396603|ssc:100155015|ssc:397653|	100518131|397674|100523723|414396|396603|100155015|397653|	PIK3CD|CAMK2D|EEF2K|ACTB|PPP3CB|ITPR3|ACTB|	http://www.genome.jp/kegg-bin/show_pathway?ssc04921/ssc:100518131%09red/ssc:100155015%09red/ssc:414396%09red/ssc:100523723%09red/ssc:396603%09red/ssc:397653%09red/ssc:397674%09red
PI3K-Akt signaling pathway	KEGG PATHWAY	ssc04151	15	328	0.753125	0.999375	ENSSSCG00000012981|ENSSSCG00000016832|ENSSSCG00000008478|ENSSSCG00000003140|ENSSSCG00000015618|ENSSSCG00000009657|ENSSSCG00000015815|ENSSSCG00000010509|ENSSSCG00000003395|ENSSSCG00000027628|ENSSSCG00000003413|ENSSSCG00000022101|ENSSSCG00000007669|ENSSSCG00000005965|ENSSSCG00000009545	ssc:100135665|ssc:100271930|ssc:100520187|ssc:100302504|ssc:100513489|ssc:397090|ssc:100153248|ssc:100155165|ssc:100518131|ssc:399522|ssc:100127359|ssc:100049662|ssc:100516546|ssc:448810|ssc:100153454|	100135665|100271930|100520187|100302504|100513489|397090|100153248|100155165|100518131|399522|100127359|100049662|100516546|448810|100153454|	RELA|IL7R, CD127| |FGF21|LAMB3|PPP2R2A|FGFR1|PIK3AP1|PIK3CD|IL6R, IL-6Ralpha|MTOR, FRAP1|BRCA1|GNB2|MYC|COL4A2|	http://www.genome.jp/kegg-bin/show_pathway?ssc04151/ssc:448810%09red/ssc:100518131%09red/ssc:100153248%09red/ssc:100271930%09red/ssc:100049662%09red/ssc:399522%09red/ssc:100135665%09red/ssc:100516546%09red/ssc:100513489%09red/ssc:100127359%09red/ssc:397090%09red/ssc:100155165%09red/ssc:100153454%09red/ssc:100520187%09red/ssc:100302504%09red
Propanoate metabolism	KEGG PATHWAY	ssc00640	1	26	0.753569	0.999375	ENSSSCG00000004846	ssc:100037986|	100037986|	MCEE|	http://www.genome.jp/kegg-bin/show_pathway?ssc00640/ssc:100037986%09red
Glycosphingolipid biosynthesis - lacto and neolacto series	KEGG PATHWAY	ssc00601	1	26	0.753569	0.999375	ENSSSCG00000010998	ssc:100511655|	100511655|	B4GALT1|	http://www.genome.jp/kegg-bin/show_pathway?ssc00601/ssc:100511655%09red
Circadian rhythm	KEGG PATHWAY	ssc04710	1	26	0.753569	0.999375	ENSSSCG00000009472	ssc:100152980|	100152980|	FBXL3|	http://www.genome.jp/kegg-bin/show_pathway?ssc04710/ssc:100152980%09red
Ovarian steroidogenesis	KEGG PATHWAY	ssc04913	2	51	0.7556	0.999375	ENSSSCG00000030900|ENSSSCG00000028512	ssc:396801|ssc:396801|	396801|396801|	LDLR|LDLR|	http://www.genome.jp/kegg-bin/show_pathway?ssc04913/ssc:396801%09red
Salivary secretion	KEGG PATHWAY	ssc04970	3	75	0.761168	0.999375	ENSSSCG00000000555|ENSSSCG00000006740|ENSSSCG00000007139	ssc:100155015|ssc:397481|ssc:552898|	100155015|397481|552898|	ITPR3|ATP1A1|ADRA1D|	http://www.genome.jp/kegg-bin/show_pathway?ssc04970/ssc:100155015%09red/ssc:552898%09red/ssc:397481%09red
Dopaminergic synapse	KEGG PATHWAY	ssc04728	5	120	0.762894	0.999375	ENSSSCG00000010301|ENSSSCG00000009657|ENSSSCG00000009123|ENSSSCG00000007669|ENSSSCG00000000555	ssc:396603|ssc:397090|ssc:397674|ssc:100516546|ssc:100155015|	396603|397090|397674|100516546|100155015|	PPP3CB|PPP2R2A|CAMK2D|GNB2|ITPR3|	http://www.genome.jp/kegg-bin/show_pathway?ssc04728/ssc:100155015%09red/ssc:100516546%09red/ssc:397090%09red/ssc:396603%09red/ssc:397674%09red
Galactose metabolism	KEGG PATHWAY	ssc00052	1	28	0.77787	0.999375	ENSSSCG00000010998	ssc:100511655|	100511655|	B4GALT1|	http://www.genome.jp/kegg-bin/show_pathway?ssc00052/ssc:100511655%09red
Mucin type O-Glycan biosynthesis	KEGG PATHWAY	ssc00512	1	28	0.77787	0.999375	ENSSSCG00000007465	ssc:100522653|	100522653|	B4GALT5|	http://www.genome.jp/kegg-bin/show_pathway?ssc00512/ssc:100522653%09red
cGMP-PKG signaling pathway	KEGG PATHWAY	ssc04022	7	167	0.781594	0.999375	ENSSSCG00000003395|ENSSSCG00000027344|ENSSSCG00000006740|ENSSSCG00000007139|ENSSSCG00000000555|ENSSSCG00000010301|ENSSSCG00000007026	ssc:100518131|ssc:396875|ssc:397481|ssc:552898|ssc:100155015|ssc:396603|ssc:397651|	100518131|396875|397481|552898|100155015|396603|397651|	PIK3CD|ATP2A2, ATP2, SERCA2|ATP1A1|ADRA1D|ITPR3|PPP3CB|VDAC1P5, VDAC3, VDAC5P|	http://www.genome.jp/kegg-bin/show_pathway?ssc04022/ssc:100518131%09red/ssc:100155015%09red/ssc:396603%09red/ssc:552898%09red/ssc:396875%09red/ssc:397651%09red/ssc:397481%09red
Glycolysis / Gluconeogenesis	KEGG PATHWAY	ssc00010	2	54	0.782116	0.999375	ENSSSCG00000012440|ENSSSCG00000015443	ssc:407608|ssc:397129|	407608|397129|	PGK1|DLD, DLDH|	http://www.genome.jp/kegg-bin/show_pathway?ssc00010/ssc:397129%09red/ssc:407608%09red
Hypertrophic cardiomyopathy (HCM)	KEGG PATHWAY	ssc05410	3	78	0.783194	0.999375	ENSSSCG00000001404|ENSSSCG00000028355|ENSSSCG00000007585	ssc:397086|ssc:397653|ssc:414396|	397086|397653|414396|	TNF, TNFa|ACTB|ACTB|	http://www.genome.jp/kegg-bin/show_pathway?ssc05410/ssc:414396%09red/ssc:397653%09red/ssc:397086%09red
Fructose and mannose metabolism	KEGG PATHWAY	ssc00051	1	29	0.789107	0.999375	ENSSSCG00000024219	ssc:100154112|	100154112|	C5H12orf5|	http://www.genome.jp/kegg-bin/show_pathway?ssc00051/ssc:100154112%09red
Protein digestion and absorption	KEGG PATHWAY	ssc04974	3	80	0.796925	0.999375	ENSSSCG00000025038|ENSSSCG00000006740|ENSSSCG00000009545	ssc:100151780|ssc:397481|ssc:100153454|	100151780|397481|100153454|	KCNJ13|ATP1A1|COL4A2|	http://www.genome.jp/kegg-bin/show_pathway?ssc04974/ssc:100153454%09red/ssc:100151780%09red/ssc:397481%09red
Other types of O-glycan biosynthesis	KEGG PATHWAY	ssc00514	1	30	0.799776	0.999375	ENSSSCG00000010998	ssc:100511655|	100511655|	B4GALT1|	http://www.genome.jp/kegg-bin/show_pathway?ssc00514/ssc:100511655%09red
ECM-receptor interaction	KEGG PATHWAY	ssc04512	3	82	0.809921	0.999375	ENSSSCG00000022204|ENSSSCG00000009545|ENSSSCG00000015618	ssc:100623869|ssc:100153454|ssc:100513489|	100623869|100153454|100513489|	AGRN|COL4A2|LAMB3|	http://www.genome.jp/kegg-bin/show_pathway?ssc04512/ssc:100623869%09red/ssc:100153454%09red/ssc:100513489%09red
Parkinson's disease	KEGG PATHWAY	ssc05012	6	151	0.810517	0.999375	ENSSSCG00000023379|ENSSSCG00000010795|ENSSSCG00000014145|ENSSSCG00000007026|ENSSSCG00000018094|ENSSSCG00000008267	ssc:100514753|ssc:100312976|ssc:100037990|ssc:397651|ssc:808513|ssc:100512831|	100514753|100312976|100037990|397651|808513|100512831|	UBE2L6|NDUFAB1|COX7C, COX7C1|VDAC1P5, VDAC3, VDAC5P|CYTB| |	http://www.genome.jp/kegg-bin/show_pathway?ssc05012/ssc:808513%09red/ssc:100312976%09red/ssc:100514753%09red/ssc:100037990%09red/ssc:100512831%09red/ssc:397651%09red
Tight junction	KEGG PATHWAY	ssc04530	5	129	0.812972	0.999375	ENSSSCG00000009657|ENSSSCG00000001414|ENSSSCG00000023503|ENSSSCG00000028355|ENSSSCG00000007585	ssc:397090|ssc:397211|ssc:100622955|ssc:397653|ssc:414396|	397090|397211|100622955|397653|414396|	PPP2R2A|CSNK2B, CK2N, CKII_beta|PRKCD|ACTB|ACTB|	http://www.genome.jp/kegg-bin/show_pathway?ssc04530/ssc:414396%09red/ssc:397090%09red/ssc:100622955%09red/ssc:397653%09red/ssc:397211%09red
VEGF signaling pathway	KEGG PATHWAY	ssc04370	2	58	0.813519	0.999375	ENSSSCG00000010301|ENSSSCG00000003395	ssc:396603|ssc:100518131|	396603|100518131|	PPP3CB|PIK3CD|	http://www.genome.jp/kegg-bin/show_pathway?ssc04370/ssc:100518131%09red/ssc:396603%09red
Long-term depression	KEGG PATHWAY	ssc04730	2	59	0.82071	0.999375	ENSSSCG00000000555|ENSSSCG00000006250	ssc:100155015|ssc:100152890|	100155015|100152890|	ITPR3|LYN|	http://www.genome.jp/kegg-bin/show_pathway?ssc04730/ssc:100155015%09red/ssc:100152890%09red
Dilated cardiomyopathy	KEGG PATHWAY	ssc05414	3	84	0.822207	0.999375	ENSSSCG00000001404|ENSSSCG00000028355|ENSSSCG00000007585	ssc:397086|ssc:397653|ssc:414396|	397086|397653|414396|	TNF, TNFa|ACTB|ACTB|	http://www.genome.jp/kegg-bin/show_pathway?ssc05414/ssc:414396%09red/ssc:397653%09red/ssc:397086%09red
Taste transduction	KEGG PATHWAY	ssc04742	1	33	0.828654	0.999375	ENSSSCG00000000555	ssc:100155015|	100155015|	ITPR3|	http://www.genome.jp/kegg-bin/show_pathway?ssc04742/ssc:100155015%09red
Insulin secretion	KEGG PATHWAY	ssc04911	3	86	0.833809	0.999375	ENSSSCG00000000555|ENSSSCG00000006740|ENSSSCG00000009123	ssc:100155015|ssc:397481|ssc:397674|	100155015|397481|397674|	ITPR3|ATP1A1|CAMK2D|	http://www.genome.jp/kegg-bin/show_pathway?ssc04911/ssc:100155015%09red/ssc:397674%09red/ssc:397481%09red
GnRH signaling pathway	KEGG PATHWAY	ssc04912	3	86	0.833809	0.999375	ENSSSCG00000000555|ENSSSCG00000008478|ENSSSCG00000009123	ssc:100155015|ssc:100520187|ssc:397674|	100155015|100520187|397674|	ITPR3| |CAMK2D|	http://www.genome.jp/kegg-bin/show_pathway?ssc04912/ssc:100155015%09red/ssc:397674%09red/ssc:100520187%09red
Cytokine-cytokine receptor interaction	KEGG PATHWAY	ssc04060	9	223	0.83407	0.999375	ENSSSCG00000008090|ENSSSCG00000016832|ENSSSCG00000017721|ENSSSCG00000020906|ENSSSCG00000027628|ENSSSCG00000017698|ENSSSCG00000008977|ENSSSCG00000001404|ENSSSCG00000015085	ssc:397094|ssc:100271930|ssc:100302703|ssc:406191|ssc:399522|ssc:396668|ssc:494019|ssc:397086|ssc:100525654|	397094|100271930|100302703|406191|399522|396668|494019|397086|100525654|	IL1A, IL-1alpha|IL7R, CD127|CCL8|TNFSF10, TRAIL|IL6R, IL-6Ralpha|CCL4, MIP-1BETA, MIP1b, SCY4A|CXCL10|TNF, TNFa|IL10RA|	http://www.genome.jp/kegg-bin/show_pathway?ssc04060/ssc:100302703%09red/ssc:100271930%09red/ssc:406191%09red/ssc:397086%09red/ssc:397094%09red/ssc:396668%09red/ssc:494019%09red/ssc:100525654%09red/ssc:399522%09red
cAMP signaling pathway	KEGG PATHWAY	ssc04024	8	201	0.834127	0.999375	ENSSSCG00000012981|ENSSSCG00000003395|ENSSSCG00000009123|ENSSSCG00000013641|ENSSSCG00000027558|ENSSSCG00000001952|ENSSSCG00000006740|ENSSSCG00000000068	ssc:100135665|ssc:100518131|ssc:397674|ssc:396825|ssc:100511175|ssc:406188|ssc:397481|ssc:100156226|	100135665|100518131|397674|396825|100511175|406188|397481|100156226|	RELA|PIK3CD|CAMK2D|PDE4A|GABBR2|NFKBIA, ECI-6/IKBA, IKBA|ATP1A1|EP300|	http://www.genome.jp/kegg-bin/show_pathway?ssc04024/ssc:100518131%09red/ssc:100135665%09red/ssc:100156226%09red/ssc:100511175%09red/ssc:397674%09red/ssc:406188%09red/ssc:396825%09red/ssc:397481%09red
Oxidative phosphorylation	KEGG PATHWAY	ssc00190	5	134	0.836918	0.999375	ENSSSCG00000018094|ENSSSCG00000017401|ENSSSCG00000014145|ENSSSCG00000010795|ENSSSCG00000006054	ssc:808513|ssc:100523018|ssc:100037990|ssc:100312976|ssc:100154942|	808513|100523018|100037990|100312976|100154942|	CYTB|ATP6V0A1|COX7C, COX7C1|NDUFAB1|ATP6V1C1|	http://www.genome.jp/kegg-bin/show_pathway?ssc00190/ssc:100523018%09red/ssc:808513%09red/ssc:100312976%09red/ssc:100154942%09red/ssc:100037990%09red
Prion diseases	KEGG PATHWAY	ssc05020	1	34	0.837324	0.999375	ENSSSCG00000008090	ssc:397094|	397094|	IL1A, IL-1alpha|	http://www.genome.jp/kegg-bin/show_pathway?ssc05020/ssc:397094%09red
Porphyrin and chlorophyll metabolism	KEGG PATHWAY	ssc00860	1	34	0.837324	0.999375	ENSSSCG00000026759	ssc:445512|	445512|	HMOX1, HSP32|	http://www.genome.jp/kegg-bin/show_pathway?ssc00860/ssc:445512%09red
Pancreatic secretion	KEGG PATHWAY	ssc04972	3	87	0.839362	0.999375	ENSSSCG00000000555|ENSSSCG00000027344|ENSSSCG00000006740	ssc:100155015|ssc:396875|ssc:397481|	100155015|396875|397481|	ITPR3|ATP2A2, ATP2, SERCA2|ATP1A1|	http://www.genome.jp/kegg-bin/show_pathway?ssc04972/ssc:100155015%09red/ssc:396875%09red/ssc:397481%09red
Arachidonic acid metabolism	KEGG PATHWAY	ssc00590	2	62	0.840813	0.999375	ENSSSCG00000010491|ENSSSCG00000026798	ssc:403111|ssc:403111|	403111|403111|	CYP2C42|CYP2C42|	http://www.genome.jp/kegg-bin/show_pathway?ssc00590/ssc:403111%09red
Serotonergic synapse	KEGG PATHWAY	ssc04726	4	112	0.843638	0.999375	ENSSSCG00000000555|ENSSSCG00000007669|ENSSSCG00000026798|ENSSSCG00000010491	ssc:100155015|ssc:100516546|ssc:403111|ssc:403111|	100155015|100516546|403111|403111|	ITPR3|GNB2|CYP2C42|CYP2C42|	http://www.genome.jp/kegg-bin/show_pathway?ssc04726/ssc:100155015%09red/ssc:100516546%09red/ssc:403111%09red
Bladder cancer	KEGG PATHWAY	ssc05219	1	35	0.845555	0.999375	ENSSSCG00000005965	ssc:448810|	448810|	MYC|	http://www.genome.jp/kegg-bin/show_pathway?ssc05219/ssc:448810%09red
DNA replication	KEGG PATHWAY	ssc03030	1	35	0.845555	0.999375	ENSSSCG00000005478	ssc:100517450|	100517450|	POLE3|	http://www.genome.jp/kegg-bin/show_pathway?ssc03030/ssc:100517450%09red
Calcium signaling pathway	KEGG PATHWAY	ssc04020	7	182	0.846687	0.999375	ENSSSCG00000009123|ENSSSCG00000027344|ENSSSCG00000007026|ENSSSCG00000023912|ENSSSCG00000007139|ENSSSCG00000010301|ENSSSCG00000000555	ssc:397674|ssc:396875|ssc:397651|ssc:100521440|ssc:552898|ssc:396603|ssc:100155015|	397674|396875|397651|100521440|552898|396603|100155015|	CAMK2D|ATP2A2, ATP2, SERCA2|VDAC1P5, VDAC3, VDAC5P| |ADRA1D|PPP3CB|ITPR3|	http://www.genome.jp/kegg-bin/show_pathway?ssc04020/ssc:100155015%09red/ssc:100521440%09red/ssc:396603%09red/ssc:552898%09red/ssc:396875%09red/ssc:397651%09red/ssc:397674%09red
Cholinergic synapse	KEGG PATHWAY	ssc04725	4	113	0.848354	0.999375	ENSSSCG00000000555|ENSSSCG00000003395|ENSSSCG00000009123|ENSSSCG00000007669	ssc:100155015|ssc:100518131|ssc:397674|ssc:100516546|	100155015|100518131|397674|100516546|	ITPR3|PIK3CD|CAMK2D|GNB2|	http://www.genome.jp/kegg-bin/show_pathway?ssc04725/ssc:100518131%09red/ssc:100155015%09red/ssc:100516546%09red/ssc:397674%09red
Purine metabolism	KEGG PATHWAY	ssc00230	7	183	0.850407	0.999375	ENSSSCG00000013641|ENSSSCG00000008399|ENSSSCG00000025233|ENSSSCG00000022912|ENSSSCG00000025298|ENSSSCG00000028278|ENSSSCG00000005478	ssc:396825|ssc:100642182|ssc:100642182|ssc:100623678|ssc:100626323|ssc:100737040|ssc:100517450|	396825|100642182|100642182|100623678|100626323|100737040|100517450|	PDE4A|PNPT1|PNPT1|NT5C3A| |POLR2A|POLE3|	http://www.genome.jp/kegg-bin/show_pathway?ssc00230/ssc:100737040%09red/ssc:100623678%09red/ssc:100642182%09red/ssc:100517450%09red/ssc:100626323%09red/ssc:396825%09red
Glycine, serine and threonine metabolism	KEGG PATHWAY	ssc00260	1	36	0.853371	0.999375	ENSSSCG00000015443	ssc:397129|	397129|	DLD, DLDH|	http://www.genome.jp/kegg-bin/show_pathway?ssc00260/ssc:397129%09red
SNARE interactions in vesicular transport	KEGG PATHWAY	ssc04130	1	36	0.853371	0.999375	ENSSSCG00000005386	ssc:100157063|	100157063|	STX17|	http://www.genome.jp/kegg-bin/show_pathway?ssc04130/ssc:100157063%09red
Morphine addiction	KEGG PATHWAY	ssc05032	3	90	0.855066	0.999375	ENSSSCG00000013641|ENSSSCG00000007669|ENSSSCG00000027558	ssc:396825|ssc:100516546|ssc:100511175|	396825|100516546|100511175|	PDE4A|GNB2|GABBR2|	http://www.genome.jp/kegg-bin/show_pathway?ssc05032/ssc:100516546%09red/ssc:396825%09red/ssc:100511175%09red
Pyruvate metabolism	KEGG PATHWAY	ssc00620	1	37	0.860791	0.999375	ENSSSCG00000015443	ssc:397129|	397129|	DLD, DLDH|	http://www.genome.jp/kegg-bin/show_pathway?ssc00620/ssc:397129%09red
Vascular smooth muscle contraction	KEGG PATHWAY	ssc04270	4	117	0.866031	0.999375	ENSSSCG00000000555|ENSSSCG00000023503|ENSSSCG00000007139|ENSSSCG00000006461	ssc:100155015|ssc:100622955|ssc:552898|ssc:100157291|	100155015|100622955|552898|100157291|	ITPR3|PRKCD|ADRA1D|ARHGEF11|	http://www.genome.jp/kegg-bin/show_pathway?ssc04270/ssc:100155015%09red/ssc:100157291%09red/ssc:100622955%09red/ssc:552898%09red
Adrenergic signaling in cardiomyocytes	KEGG PATHWAY	ssc04261	5	141	0.866162	0.999375	ENSSSCG00000009657|ENSSSCG00000003395|ENSSSCG00000006740|ENSSSCG00000009123|ENSSSCG00000007139	ssc:397090|ssc:100518131|ssc:397481|ssc:397674|ssc:552898|	397090|100518131|397481|397674|552898|	PPP2R2A|PIK3CD|ATP1A1|CAMK2D|ADRA1D|	http://www.genome.jp/kegg-bin/show_pathway?ssc04261/ssc:100518131%09red/ssc:397674%09red/ssc:397090%09red/ssc:552898%09red/ssc:397481%09red
Axon guidance	KEGG PATHWAY	ssc04360	4	119	0.874186	0.999375	ENSSSCG00000010301|ENSSSCG00000011843|ENSSSCG00000006495|ENSSSCG00000026412	ssc:396603|ssc:100511837|ssc:100157147|ssc:100620331|	396603|100511837|100157147|100620331|	PPP3CB|PAK2|SEMA4A|PLXNA3|	http://www.genome.jp/kegg-bin/show_pathway?ssc04360/ssc:100620331%09red/ssc:100511837%09red/ssc:396603%09red/ssc:100157147%09red
Melanogenesis	KEGG PATHWAY	ssc04916	3	95	0.878265	0.999375	ENSSSCG00000000068|ENSSSCG00000010638|ENSSSCG00000009123	ssc:100156226|ssc:100153922|ssc:397674|	100156226|100153922|397674|	EP300|TCF7L2|CAMK2D|	http://www.genome.jp/kegg-bin/show_pathway?ssc04916/ssc:100156226%09red/ssc:100153922%09red/ssc:397674%09red
Cell adhesion molecules (CAMs)	KEGG PATHWAY	ssc04514	5	146	0.884236	0.999375	ENSSSCG00000003592|ENSSSCG00000005211|ENSSSCG00000001341|ENSSSCG00000026305|ENSSSCG00000014136	ssc:100516859|ssc:574058|ssc:100135031|ssc:574057|ssc:397328|	100516859|574058|100135031|574057|397328|	SDC3|CD274, PDL1|SLA-2, SLA-B|PDCD1LG2, PDL2|VCAN, CSPG2|	http://www.genome.jp/kegg-bin/show_pathway?ssc04514/ssc:397328%09red/ssc:574057%09red/ssc:574058%09red/ssc:100135031%09red/ssc:100516859%09red
Circadian entrainment	KEGG PATHWAY	ssc04713	3	98	0.890545	0.999375	ENSSSCG00000000555|ENSSSCG00000009123|ENSSSCG00000007669	ssc:100155015|ssc:397674|ssc:100516546|	100155015|397674|100516546|	ITPR3|CAMK2D|GNB2|	http://www.genome.jp/kegg-bin/show_pathway?ssc04713/ssc:100155015%09red/ssc:397674%09red/ssc:100516546%09red
Vasopressin-regulated water reabsorption	KEGG PATHWAY	ssc04962	1	43	0.898063	0.999375	ENSSSCG00000002538	ssc:100037291|	100037291|	DYNC1H1|	http://www.genome.jp/kegg-bin/show_pathway?ssc04962/ssc:100037291%09red
Nucleotide excision repair	KEGG PATHWAY	ssc03420	1	44	0.903223	0.999375	ENSSSCG00000005478	ssc:100517450|	100517450|	POLE3|	http://www.genome.jp/kegg-bin/show_pathway?ssc03420/ssc:100517450%09red
Sphingolipid metabolism	KEGG PATHWAY	ssc00600	1	45	0.908122	0.999375	ENSSSCG00000026955	ssc:100155321|	100155321|	ACER2|	http://www.genome.jp/kegg-bin/show_pathway?ssc00600/ssc:100155321%09red
Cocaine addiction	KEGG PATHWAY	ssc05030	1	46	0.912773	0.999375	ENSSSCG00000012981	ssc:100135665|	100135665|	RELA|	http://www.genome.jp/kegg-bin/show_pathway?ssc05030/ssc:100135665%09red
Proteasome	KEGG PATHWAY	ssc03050	1	46	0.912773	0.999375	ENSSSCG00000002006	ssc:397572|	397572|	PSME1|	http://www.genome.jp/kegg-bin/show_pathway?ssc03050/ssc:397572%09red
MicroRNAs in cancer	KEGG PATHWAY	ssc05206	8	228	0.913852	0.999375	ENSSSCG00000010235|ENSSSCG00000017403|ENSSSCG00000008478|ENSSSCG00000022101|ENSSSCG00000000068|ENSSSCG00000005965|ENSSSCG00000001516|ENSSSCG00000003413	ssc:751859|ssc:733648|ssc:100520187|ssc:100049662|ssc:100156226|ssc:448810|ssc:397543|ssc:100127359|	751859|733648|100520187|100049662|100156226|448810|397543|100127359|	SIRT1|STAT3| |BRCA1|EP300|MYC|BAK, Bak1|MTOR, FRAP1|	http://www.genome.jp/kegg-bin/show_pathway?ssc05206/ssc:448810%09red/ssc:733648%09red/ssc:751859%09red/ssc:397543%09red/ssc:100156226%09red/ssc:100127359%09red/ssc:100520187%09red/ssc:100049662%09red
Oocyte meiosis	KEGG PATHWAY	ssc04114	3	107	0.92099	0.999375	ENSSSCG00000010301|ENSSSCG00000009123|ENSSSCG00000000555	ssc:396603|ssc:397674|ssc:100155015|	396603|397674|100155015|	PPP3CB|CAMK2D|ITPR3|	http://www.genome.jp/kegg-bin/show_pathway?ssc04114/ssc:100155015%09red/ssc:397674%09red/ssc:396603%09red
Starch and sucrose metabolism	KEGG PATHWAY	ssc00500	1	49	0.925362	0.999375	ENSSSCG00000012000	ssc:100156209|	100156209|	GBE1|	http://www.genome.jp/kegg-bin/show_pathway?ssc00500/ssc:100156209%09red
N-Glycan biosynthesis	KEGG PATHWAY	ssc00510	1	49	0.925362	0.999375	ENSSSCG00000010998	ssc:100511655|	100511655|	B4GALT1|	http://www.genome.jp/kegg-bin/show_pathway?ssc00510/ssc:100511655%09red
Amino sugar and nucleotide sugar metabolism	KEGG PATHWAY	ssc00520	1	49	0.925362	0.999375	ENSSSCG00000008808	ssc:100516092|	100516092|	GNPDA2|	http://www.genome.jp/kegg-bin/show_pathway?ssc00520/ssc:100516092%09red
Fanconi anemia pathway	KEGG PATHWAY	ssc03460	1	51	0.932729	0.999375	ENSSSCG00000022101	ssc:100049662|	100049662|	BRCA1|	http://www.genome.jp/kegg-bin/show_pathway?ssc03460/ssc:100049662%09red
Autoimmune thyroid disease	KEGG PATHWAY	ssc05320	1	51	0.932729	0.999375	ENSSSCG00000001341	ssc:100135031|	100135031|	SLA-2, SLA-B|	http://www.genome.jp/kegg-bin/show_pathway?ssc05320/ssc:100135031%09red
Ribosome biogenesis in eukaryotes	KEGG PATHWAY	ssc03008	2	83	0.932994	0.999375	ENSSSCG00000001414|ENSSSCG00000004328	ssc:397211|ssc:100525725|	397211|100525725|	CSNK2B, CK2N, CKII_beta|MDN1|	http://www.genome.jp/kegg-bin/show_pathway?ssc03008/ssc:100525725%09red/ssc:397211%09red
Basal cell carcinoma	KEGG PATHWAY	ssc05217	1	52	0.936135	0.999375	ENSSSCG00000010638	ssc:100153922|	100153922|	TCF7L2|	http://www.genome.jp/kegg-bin/show_pathway?ssc05217/ssc:100153922%09red
GABAergic synapse	KEGG PATHWAY	ssc04727	2	85	0.938448	0.999375	ENSSSCG00000007669|ENSSSCG00000027558	ssc:100516546|ssc:100511175|	100516546|100511175|	GNB2|GABBR2|	http://www.genome.jp/kegg-bin/show_pathway?ssc04727/ssc:100516546%09red/ssc:100511175%09red
Alcoholism	KEGG PATHWAY	ssc05034	4	143	0.943042	0.999375	ENSSSCG00000009178|ENSSSCG00000008478|ENSSSCG00000007669|ENSSSCG00000017202	ssc:100141311|ssc:100520187|ssc:100516546|ssc:396970|	100141311|100520187|100516546|396970|	H2AFZ, H2A.Z, H2A.Z-1| |GNB2|H3F3A|	http://www.genome.jp/kegg-bin/show_pathway?ssc05034/ssc:100520187%09red/ssc:396970%09red/ssc:100141311%09red/ssc:100516546%09red
Arginine and proline metabolism	KEGG PATHWAY	ssc00330	1	55	0.945354	0.999375	ENSSSCG00000010855	ssc:100524702|	100524702|	PYCR2|	http://www.genome.jp/kegg-bin/show_pathway?ssc00330/ssc:100524702%09red
Gap junction	KEGG PATHWAY	ssc04540	2	90	0.950298	0.999839	ENSSSCG00000000555|ENSSSCG00000008478	ssc:100155015|ssc:100520187|	100155015|100520187|	ITPR3| |	http://www.genome.jp/kegg-bin/show_pathway?ssc04540/ssc:100155015%09red/ssc:100520187%09red
Glutamatergic synapse	KEGG PATHWAY	ssc04724	3	123	0.956722	1	ENSSSCG00000010301|ENSSSCG00000007669|ENSSSCG00000000555	ssc:396603|ssc:100516546|ssc:100155015|	396603|100516546|100155015|	PPP3CB|GNB2|ITPR3|	http://www.genome.jp/kegg-bin/show_pathway?ssc04724/ssc:100155015%09red/ssc:100516546%09red/ssc:396603%09red
Retrograde endocannabinoid signaling	KEGG PATHWAY	ssc04723	2	95	0.95995	1	ENSSSCG00000000555|ENSSSCG00000007669	ssc:100155015|ssc:100516546|	100155015|100516546|	ITPR3|GNB2|	http://www.genome.jp/kegg-bin/show_pathway?ssc04723/ssc:100155015%09red/ssc:100516546%09red
Protein processing in endoplasmic reticulum	KEGG PATHWAY	ssc04141	4	162	0.970868	1	ENSSSCG00000008208|ENSSSCG00000027057|ENSSSCG00000025181|ENSSSCG00000001516	ssc:100513348|ssc:100514334|ssc:100523731|ssc:397543|	100513348|100514334|100523731|397543|	EIF2AK3|SYVN1| |BAK, Bak1|	http://www.genome.jp/kegg-bin/show_pathway?ssc04141/ssc:397543%09red/ssc:100523731%09red/ssc:100513348%09red/ssc:100514334%09red
Aminoacyl-tRNA biosynthesis	KEGG PATHWAY	ssc00970	1	68	0.972199	1	ENSSSCG00000002516	ssc:100515390|	100515390|	WARS|	http://www.genome.jp/kegg-bin/show_pathway?ssc00970/ssc:100515390%09red
Complement and coagulation cascades	KEGG PATHWAY	ssc04610	1	73	0.978564	1	ENSSSCG00000010893	ssc:397525|	397525|	CFH, HF1|	http://www.genome.jp/kegg-bin/show_pathway?ssc04610/ssc:397525%09red
Cell cycle	KEGG PATHWAY	ssc04110	2	115	0.983412	1	ENSSSCG00000000068|ENSSSCG00000005965	ssc:100156226|ssc:448810|	100156226|448810|	EP300|MYC|	http://www.genome.jp/kegg-bin/show_pathway?ssc04110/ssc:448810%09red/ssc:100156226%09red
Peroxisome	KEGG PATHWAY	ssc04146	1	80	0.985106	1	ENSSSCG00000002362	ssc:100152503|	100152503|	|	http://www.genome.jp/kegg-bin/show_pathway?ssc04146/ssc:100152503%09red
Progesterone-mediated oocyte maturation	KEGG PATHWAY	ssc04914	1	85	0.988518	1	ENSSSCG00000003395	ssc:100518131|	100518131|	PIK3CD|	http://www.genome.jp/kegg-bin/show_pathway?ssc04914/ssc:100518131%09red
Metabolic pathways	KEGG PATHWAY	ssc01100	33	1166	0.99998	1	ENSSSCG00000025942|ENSSSCG00000027340|ENSSSCG00000010998|ENSSSCG00000010855|ENSSSCG00000028278|ENSSSCG00000008808|ENSSSCG00000006054|ENSSSCG00000005629|ENSSSCG00000007307|ENSSSCG00000017401|ENSSSCG00000014145|ENSSSCG00000007872|ENSSSCG00000025298|ENSSSCG00000015443|ENSSSCG00000005478|ENSSSCG00000026955|ENSSSCG00000026798|ENSSSCG00000021395|ENSSSCG00000010491|ENSSSCG00000008207|ENSSSCG00000003973|…	ssc:100624482|ssc:100623115|ssc:100511655|ssc:100524702|ssc:100737040|ssc:100516092|ssc:100154942|ssc:100523714|ssc:100156145|ssc:100523018|ssc:100037990|ssc:100514160|ssc:100626323|ssc:397129|ssc:100517450|ssc:100155321|ssc:403111|ssc:100126281|ssc:403111|ssc:100038014|ssc:100525292|ssc:100157143|ssc:100156209|ssc:100628006|ssc:100037986|ssc:397520|ssc:407608|ssc:100623678|ssc:100312976|ssc:1001…	100624482|100623115|100511655|100524702|100737040|100516092|100154942|100523714|100156145|100523018|100037990|100514160|100626323|397129|100517450|100155321|403111|100126281|403111|100038014|100525292|100157143|100156209|100628006|100037986|397520|407608|100623678|100312976|100144468|100154835|808513|100514878|	MCCC1|PI4K2B|B4GALT1|PYCR2|POLR2A|GNPDA2|ATP6V1C1|PIP5KL1| |ATP6V0A1|COX7C, COX7C1|XYLT1| |DLD, DLDH|POLE3|ACER2|CYP2C42|CYP3A46, CYP3A88|CYP2C42|RPIA|CTPS1|PI4KA|GBE1|ACO1|MCEE|ANPEP, APN, PEPN|PGK1|NT5C3A|NDUFAB1|CYP3A22|MOCS1|CYTB|INPP1|	http://www.genome.jp/kegg-bin/show_pathway?ssc01100/ssc:100737040%09red/ssc:100312976%09red/ssc:100154835%09red/ssc:100157143%09red/ssc:100156209%09red/ssc:100517450%09red/ssc:100144468%09red/ssc:100511655%09red/ssc:808513%09red/ssc:100038014%09red/ssc:100037986%09red/ssc:100628006%09red/ssc:397129%09red/ssc:100624482%09red/ssc:100126281%09red/ssc:100623115%09red/ssc:407608%09red/ssc:100154942%09…
Neuroactive ligand-receptor interaction	KEGG PATHWAY	ssc04080	2	268	0.999988	1	ENSSSCG00000007139|ENSSSCG00000027558	ssc:552898|ssc:100511175|	552898|100511175|	ADRA1D|GABBR2|	http://www.genome.jp/kegg-bin/show_pathway?ssc04080/ssc:552898%09red/ssc:100511175%09red
Olfactory transduction	KEGG PATHWAY	ssc04740	5	810	1	1	ENSSSCG00000014781|ENSSSCG00000005420|ENSSSCG00000021160|ENSSSCG00000009123|ENSSSCG00000014742	ssc:100518798|ssc:100739528|ssc:100153881|ssc:397674|ssc:100521811|	100518798|100739528|100153881|397674|100521811|	| | |CAMK2D| |	http://www.genome.jp/kegg-bin/show_pathway?ssc04740/ssc:100153881%09red/ssc:100739528%09red/ssc:100521811%09red/ssc:100518798%09red/ssc:397674%09red
--------------------
#Term	Database	ID	Input number	Background number	P-Value	Corrected P-Value	Input	KO	Entrez_ID	KO_name	Hyperlink
--------------------
#Term	Database	ID	Input number	Background number	P-Value	Corrected P-Value	Input	KO	Entrez_ID	KO_name	Hyperlink
--------------------

## Sheet: GSWW Down
##Databases: KEGG PATHWAY
##Statistical test method: hypergeometric test / Fisher's exact test
##FDR correction method: Benjamini and Hochberg
#Term	Database	ID	Input number	Background number	P-Value	Corrected P-Value	Input	KO	Entrez_ID	KO_name	Hyperlink
Long-term depression	KEGG PATHWAY	ssc04730	4	59	0.0274867	0.872961	ENSSSCG00000000857|ENSSSCG00000012275|ENSSSCG00000007058|ENSSSCG00000022633	ssc:397491|ssc:397601|ssc:100516581|ssc:397601|	397491|397601|100516581|397601|	IGF1, IGF-I, Npt2B|ARAF, ARAF1|PLCB4|ARAF, ARAF1|	http://www.genome.jp/kegg-bin/show_pathway?ssc04730/ssc:397491%09red/ssc:397601%09red/ssc:100516581%09red
Glioma	KEGG PATHWAY	ssc05214	4	61	0.0303831	0.872961	ENSSSCG00000000857|ENSSSCG00000012275|ENSSSCG00000010872|ENSSSCG00000022633	ssc:397491|ssc:397601|ssc:100513811|ssc:397601|	397491|397601|100513811|397601|	IGF1, IGF-I, Npt2B|ARAF, ARAF1|AKT3|ARAF, ARAF1|	http://www.genome.jp/kegg-bin/show_pathway?ssc05214/ssc:397491%09red/ssc:397601%09red/ssc:100513811%09red
Viral myocarditis	KEGG PATHWAY	ssc05416	4	63	0.0334529	0.872961	ENSSSCG00000028801|ENSSSCG00000001341|ENSSSCG00000016634|ENSSSCG00000026049	ssc:100621559|ssc:100135031|ssc:404693|ssc:100626234|	100621559|100135031|404693|100626234|	|SLA-2, SLA-B|CAV1| |	http://www.genome.jp/kegg-bin/show_pathway?ssc05416/ssc:404693%09red/ssc:100626234%09red/ssc:100135031%09red/ssc:100621559%09red
Colorectal cancer	KEGG PATHWAY	ssc05210	4	68	0.0418914	0.872961	ENSSSCG00000012275|ENSSSCG00000010872|ENSSSCG00000022633|ENSSSCG00000026049	ssc:397601|ssc:100513811|ssc:397601|ssc:100626234|	397601|100513811|397601|100626234|	ARAF, ARAF1|AKT3|ARAF, ARAF1| |	http://www.genome.jp/kegg-bin/show_pathway?ssc05210/ssc:100626234%09red/ssc:397601%09red/ssc:100513811%09red
Melanoma	KEGG PATHWAY	ssc05218	4	69	0.0437105	0.872961	ENSSSCG00000000857|ENSSSCG00000012275|ENSSSCG00000010872|ENSSSCG00000022633	ssc:397491|ssc:397601|ssc:100513811|ssc:397601|	397491|397601|100513811|397601|	IGF1, IGF-I, Npt2B|ARAF, ARAF1|AKT3|ARAF, ARAF1|	http://www.genome.jp/kegg-bin/show_pathway?ssc05218/ssc:397491%09red/ssc:397601%09red/ssc:100513811%09red
Sulfur metabolism	KEGG PATHWAY	ssc00920	2	17	0.0458117	0.872961	ENSSSCG00000027672|ENSSSCG00000026049	ssc:100625272|ssc:100626234|	100625272|100626234|	SUOX| |	http://www.genome.jp/kegg-bin/show_pathway?ssc00920/ssc:100625272%09red/ssc:100626234%09red
Adherens junction	KEGG PATHWAY	ssc04520	4	71	0.0474798	0.872961	ENSSSCG00000014087|ENSSSCG00000017756|ENSSSCG00000006368|ENSSSCG00000022003	ssc:100157656|ssc:100620270|ssc:100154054|ssc:100521277|	100157656|100620270|100154054|100521277|	IQGAP1| |PVRL4|PTPRF|	http://www.genome.jp/kegg-bin/show_pathway?ssc04520/ssc:100157656%09red/ssc:100620270%09red/ssc:100521277%09red/ssc:100154054%09red
Serotonergic synapse	KEGG PATHWAY	ssc04726	5	112	0.0621638	0.872961	ENSSSCG00000003825|ENSSSCG00000012275|ENSSSCG00000007058|ENSSSCG00000005462|ENSSSCG00000022633	ssc:100524940|ssc:397601|ssc:100516581|ssc:100515992|ssc:397601|	100524940|397601|100516581|100515992|397601|	|ARAF, ARAF1|PLCB4|GNG10|ARAF, ARAF1|	http://www.genome.jp/kegg-bin/show_pathway?ssc04726/ssc:100515992%09red/ssc:100524940%09red/ssc:397601%09red/ssc:100516581%09red
Endometrial cancer	KEGG PATHWAY	ssc05213	3	49	0.0682856	0.872961	ENSSSCG00000012275|ENSSSCG00000010872|ENSSSCG00000022633	ssc:397601|ssc:100513811|ssc:397601|	397601|100513811|397601|	ARAF, ARAF1|AKT3|ARAF, ARAF1|	http://www.genome.jp/kegg-bin/show_pathway?ssc05213/ssc:397601%09red/ssc:100513811%09red
Proteoglycans in cancer	KEGG PATHWAY	ssc05205	7	192	0.0714413	0.872961	ENSSSCG00000014087|ENSSSCG00000012275|ENSSSCG00000010872|ENSSSCG00000016634|ENSSSCG00000000857|ENSSSCG00000000361|ENSSSCG00000022633	ssc:100157656|ssc:397601|ssc:100513811|ssc:404693|ssc:397491|ssc:100155929|ssc:397601|	100157656|397601|100513811|404693|397491|100155929|397601|	IQGAP1|ARAF, ARAF1|AKT3|CAV1|IGF1, IGF-I, Npt2B|CD63|ARAF, ARAF1|	http://www.genome.jp/kegg-bin/show_pathway?ssc05205/ssc:100155929%09red/ssc:404693%09red/ssc:100157656%09red/ssc:397601%09red/ssc:100513811%09red/ssc:397491%09red
Non-small cell lung cancer	KEGG PATHWAY	ssc05223	3	52	0.0779726	0.872961	ENSSSCG00000012275|ENSSSCG00000010872|ENSSSCG00000022633	ssc:397601|ssc:100513811|ssc:397601|	397601|100513811|397601|	ARAF, ARAF1|AKT3|ARAF, ARAF1|	http://www.genome.jp/kegg-bin/show_pathway?ssc05223/ssc:397601%09red/ssc:100513811%09red
Progesterone-mediated oocyte maturation	KEGG PATHWAY	ssc04914	4	85	0.0786821	0.872961	ENSSSCG00000000857|ENSSSCG00000012275|ENSSSCG00000010872|ENSSSCG00000022633	ssc:397491|ssc:397601|ssc:100513811|ssc:397601|	397491|397601|100513811|397601|	IGF1, IGF-I, Npt2B|ARAF, ARAF1|AKT3|ARAF, ARAF1|	http://www.genome.jp/kegg-bin/show_pathway?ssc04914/ssc:397491%09red/ssc:397601%09red/ssc:100513811%09red
Prostate cancer	KEGG PATHWAY	ssc05215	4	85	0.0786821	0.872961	ENSSSCG00000000857|ENSSSCG00000012275|ENSSSCG00000010872|ENSSSCG00000022633	ssc:397491|ssc:397601|ssc:100513811|ssc:397601|	397491|397601|100513811|397601|	IGF1, IGF-I, Npt2B|ARAF, ARAF1|AKT3|ARAF, ARAF1|	http://www.genome.jp/kegg-bin/show_pathway?ssc05215/ssc:397491%09red/ssc:397601%09red/ssc:100513811%09red
Asthma	KEGG PATHWAY	ssc05310	2	24	0.0802004	0.872961	ENSSSCG00000006413|ENSSSCG00000028801	ssc:100152827|ssc:100621559|	100152827|100621559|	FCER1A| |	http://www.genome.jp/kegg-bin/show_pathway?ssc05310/ssc:100152827%09red/ssc:100621559%09red
Acute myeloid leukemia	KEGG PATHWAY	ssc05221	3	54	0.0847452	0.872961	ENSSSCG00000012275|ENSSSCG00000010872|ENSSSCG00000022633	ssc:397601|ssc:100513811|ssc:397601|	397601|100513811|397601|	ARAF, ARAF1|AKT3|ARAF, ARAF1|	http://www.genome.jp/kegg-bin/show_pathway?ssc05221/ssc:397601%09red/ssc:100513811%09red
Arginine and proline metabolism	KEGG PATHWAY	ssc00330	3	55	0.0882225	0.872961	ENSSSCG00000002294|ENSSSCG00000010855|ENSSSCG00000000401	ssc:100155893|ssc:100524702|ssc:100738224|	100155893|100524702|100738224|	ARG2|PYCR2|GLS2|	http://www.genome.jp/kegg-bin/show_pathway?ssc00330/ssc:100738224%09red/ssc:100524702%09red/ssc:100155893%09red
Hepatitis C	KEGG PATHWAY	ssc05160	5	127	0.0927789	0.872961	ENSSSCG00000012275|ENSSSCG00000010872|ENSSSCG00000030408|ENSSSCG00000022633|ENSSSCG00000010453	ssc:397601|ssc:100513811|ssc:396723|ssc:397601|ssc:100153038|	397601|100513811|396723|397601|100153038|	ARAF, ARAF1|AKT3|DDX58, RHIV-1, RIG-1, RIG-I, RLR-1|ARAF, ARAF1|IFIT1|	http://www.genome.jp/kegg-bin/show_pathway?ssc05160/ssc:100153038%09red/ssc:396723%09red/ssc:397601%09red/ssc:100513811%09red
Insulin signaling pathway	KEGG PATHWAY	ssc04910	5	133	0.106842	0.872961	ENSSSCG00000003018|ENSSSCG00000012275|ENSSSCG00000010872|ENSSSCG00000022003|ENSSSCG00000022633	ssc:397583|ssc:397601|ssc:100513811|ssc:100521277|ssc:397601|	397583|397601|100513811|100521277|397601|	LIPE, HSL|ARAF, ARAF1|AKT3|PTPRF|ARAF, ARAF1|	http://www.genome.jp/kegg-bin/show_pathway?ssc04910/ssc:397583%09red/ssc:397601%09red/ssc:100513811%09red/ssc:100521277%09red
FoxO signaling pathway	KEGG PATHWAY	ssc04068	5	133	0.106842	0.872961	ENSSSCG00000017756|ENSSSCG00000000857|ENSSSCG00000012275|ENSSSCG00000010872|ENSSSCG00000022633	ssc:100620270|ssc:397491|ssc:397601|ssc:100513811|ssc:397601|	100620270|397491|397601|100513811|397601|	|IGF1, IGF-I, Npt2B|ARAF, ARAF1|AKT3|ARAF, ARAF1|	http://www.genome.jp/kegg-bin/show_pathway?ssc04068/ssc:397491%09red/ssc:100620270%09red/ssc:397601%09red/ssc:100513811%09red
Pancreatic cancer	KEGG PATHWAY	ssc05212	3	63	0.118071	0.872961	ENSSSCG00000012275|ENSSSCG00000010872|ENSSSCG00000022633	ssc:397601|ssc:100513811|ssc:397601|	397601|100513811|397601|	ARAF, ARAF1|AKT3|ARAF, ARAF1|	http://www.genome.jp/kegg-bin/show_pathway?ssc05212/ssc:397601%09red/ssc:100513811%09red
Biosynthesis of amino acids	KEGG PATHWAY	ssc01230	3	63	0.118071	0.872961	ENSSSCG00000023782|ENSSSCG00000002294|ENSSSCG00000010855	ssc:733641|ssc:100155893|ssc:100524702|	733641|100155893|100524702|	IDH3B|ARG2|PYCR2|	http://www.genome.jp/kegg-bin/show_pathway?ssc01230/ssc:100524702%09red/ssc:100155893%09red/ssc:733641%09red
Fc epsilon RI signaling pathway	KEGG PATHWAY	ssc04664	3	63	0.118071	0.872961	ENSSSCG00000006413|ENSSSCG00000012495|ENSSSCG00000010872	ssc:100152827|ssc:100627308|ssc:100513811|	100152827|100627308|100513811|	FCER1A|BTK|AKT3|	http://www.genome.jp/kegg-bin/show_pathway?ssc04664/ssc:100627308%09red/ssc:100513811%09red/ssc:100152827%09red
Renal cell carcinoma	KEGG PATHWAY	ssc05211	3	64	0.122037	0.872961	ENSSSCG00000012275|ENSSSCG00000010872|ENSSSCG00000022633	ssc:397601|ssc:100513811|ssc:397601|	397601|100513811|397601|	ARAF, ARAF1|AKT3|ARAF, ARAF1|	http://www.genome.jp/kegg-bin/show_pathway?ssc05211/ssc:397601%09red/ssc:100513811%09red
Linoleic acid metabolism	KEGG PATHWAY	ssc00591	2	32	0.126174	0.872961	ENSSSCG00000023320|ENSSSCG00000003825	ssc:100144468|ssc:100524940|	100144468|100524940|	CYP3A22| |	http://www.genome.jp/kegg-bin/show_pathway?ssc00591/ssc:100524940%09red/ssc:100144468%09red
RIG-I-like receptor signaling pathway	KEGG PATHWAY	ssc04622	3	68	0.138372	0.872961	ENSSSCG00000005136|ENSSSCG00000030408|ENSSSCG00000017416	ssc:100125969|ssc:396723|ssc:100524520|	100125969|396723|100524520|	IFNE, IFN-epsilon, IFNE1|DDX58, RHIV-1, RIG-1, RIG-I, RLR-1|DHX58, LGP2|	http://www.genome.jp/kegg-bin/show_pathway?ssc04622/ssc:396723%09red/ssc:100524520%09red/ssc:100125969%09red
Long-term potentiation	KEGG PATHWAY	ssc04720	3	68	0.138372	0.872961	ENSSSCG00000012275|ENSSSCG00000007058|ENSSSCG00000022633	ssc:397601|ssc:100516581|ssc:397601|	397601|100516581|397601|	ARAF, ARAF1|PLCB4|ARAF, ARAF1|	http://www.genome.jp/kegg-bin/show_pathway?ssc04720/ssc:397601%09red/ssc:100516581%09red
African trypanosomiasis	KEGG PATHWAY	ssc05143	2	34	0.138472	0.872961	ENSSSCG00000007978|ENSSSCG00000007058	ssc:100737768|ssc:100516581|	100737768|100516581|	|PLCB4|	http://www.genome.jp/kegg-bin/show_pathway?ssc05143/ssc:100737768%09red/ssc:100516581%09red
Bile secretion	KEGG PATHWAY	ssc04976	3	69	0.142567	0.872961	ENSSSCG00000026300|ENSSSCG00000003130|ENSSSCG00000010036	ssc:397049|ssc:641359|ssc:397113|	397049|641359|397113|	OCT1, SLC22A1|SULT2A1|SLC5A1, SGLT1|	http://www.genome.jp/kegg-bin/show_pathway?ssc04976/ssc:641359%09red/ssc:397049%09red/ssc:397113%09red
Chronic myeloid leukemia	KEGG PATHWAY	ssc05220	3	69	0.142567	0.872961	ENSSSCG00000012275|ENSSSCG00000010872|ENSSSCG00000022633	ssc:397601|ssc:100513811|ssc:397601|	397601|100513811|397601|	ARAF, ARAF1|AKT3|ARAF, ARAF1|	http://www.genome.jp/kegg-bin/show_pathway?ssc05220/ssc:397601%09red/ssc:100513811%09red
Bladder cancer	KEGG PATHWAY	ssc05219	2	35	0.144715	0.872961	ENSSSCG00000012275|ENSSSCG00000022633	ssc:397601|ssc:397601|	397601|397601|	ARAF, ARAF1|ARAF, ARAF1|	http://www.genome.jp/kegg-bin/show_pathway?ssc05219/ssc:397601%09red
Graft-versus-host disease	KEGG PATHWAY	ssc05332	2	35	0.144715	0.872961	ENSSSCG00000028801|ENSSSCG00000001341	ssc:100621559|ssc:100135031|	100621559|100135031|	|SLA-2, SLA-B|	http://www.genome.jp/kegg-bin/show_pathway?ssc05332/ssc:100135031%09red/ssc:100621559%09red
Allograft rejection	KEGG PATHWAY	ssc05330	2	38	0.163774	0.921785	ENSSSCG00000028801|ENSSSCG00000001341	ssc:100621559|ssc:100135031|	100621559|100135031|	|SLA-2, SLA-B|	http://www.genome.jp/kegg-bin/show_pathway?ssc05330/ssc:100135031%09red/ssc:100621559%09red
Sulfur relay system	KEGG PATHWAY	ssc04122	1	9	0.167322	0.921785	ENSSSCG00000007307	ssc:100156145|	100156145|	|	http://www.genome.jp/kegg-bin/show_pathway?ssc04122/ssc:100156145%09red
Type I diabetes mellitus	KEGG PATHWAY	ssc04940	2	42	0.189805	0.921785	ENSSSCG00000028801|ENSSSCG00000001341	ssc:100621559|ssc:100135031|	100621559|100135031|	|SLA-2, SLA-B|	http://www.genome.jp/kegg-bin/show_pathway?ssc04940/ssc:100135031%09red/ssc:100621559%09red
Carbohydrate digestion and absorption	KEGG PATHWAY	ssc04973	2	42	0.189805	0.921785	ENSSSCG00000010872|ENSSSCG00000010036	ssc:100513811|ssc:397113|	100513811|397113|	AKT3|SLC5A1, SGLT1|	http://www.genome.jp/kegg-bin/show_pathway?ssc04973/ssc:100513811%09red/ssc:397113%09red
Glutamatergic synapse	KEGG PATHWAY	ssc04724	4	123	0.199735	0.921785	ENSSSCG00000007058|ENSSSCG00000005462|ENSSSCG00000022189|ENSSSCG00000000401	ssc:100516581|ssc:100515992|ssc:100521916|ssc:100738224|	100516581|100515992|100521916|100738224|	PLCB4|GNG10|GRM3|GLS2|	http://www.genome.jp/kegg-bin/show_pathway?ssc04724/ssc:100738224%09red/ssc:100515992%09red/ssc:100521916%09red/ssc:100516581%09red
Sphingolipid metabolism	KEGG PATHWAY	ssc00600	2	45	0.209668	0.921785	ENSSSCG00000004408|ENSSSCG00000010433	ssc:100152155|ssc:100037303|	100152155|100037303|	SMPD2|SGMS1, SMS1|	http://www.genome.jp/kegg-bin/show_pathway?ssc00600/ssc:100152155%09red/ssc:100037303%09red
ErbB signaling pathway	KEGG PATHWAY	ssc04012	3	85	0.214535	0.921785	ENSSSCG00000012275|ENSSSCG00000010872|ENSSSCG00000022633	ssc:397601|ssc:100513811|ssc:397601|	397601|100513811|397601|	ARAF, ARAF1|AKT3|ARAF, ARAF1|	http://www.genome.jp/kegg-bin/show_pathway?ssc04012/ssc:397601%09red/ssc:100513811%09red
Insulin secretion	KEGG PATHWAY	ssc04911	3	86	0.219274	0.921785	ENSSSCG00000026756|ENSSSCG00000006542|ENSSSCG00000007058	ssc:100624568|ssc:397045|ssc:100516581|	100624568|397045|100516581|	|KCNN3, KCa2.3|PLCB4|	http://www.genome.jp/kegg-bin/show_pathway?ssc04911/ssc:397045%09red/ssc:100624568%09red/ssc:100516581%09red
Riboflavin metabolism	KEGG PATHWAY	ssc00740	1	13	0.226148	0.921785	ENSSSCG00000028817	ssc:100621671|	100621671|	|	http://www.genome.jp/kegg-bin/show_pathway?ssc00740/ssc:100621671%09red
NF-kappa B signaling pathway	KEGG PATHWAY	ssc04064	3	90	0.238432	0.921785	ENSSSCG00000028801|ENSSSCG00000012495|ENSSSCG00000030408	ssc:100621559|ssc:100627308|ssc:396723|	100621559|100627308|396723|	|BTK|DDX58, RHIV-1, RIG-1, RIG-I, RLR-1|	http://www.genome.jp/kegg-bin/show_pathway?ssc04064/ssc:100627308%09red/ssc:396723%09red/ssc:100621559%09red
Ovarian steroidogenesis	KEGG PATHWAY	ssc04913	2	51	0.249902	0.921785	ENSSSCG00000000857|ENSSSCG00000003825	ssc:397491|ssc:100524940|	397491|100524940|	IGF1, IGF-I, Npt2B| |	http://www.genome.jp/kegg-bin/show_pathway?ssc04913/ssc:100524940%09red/ssc:397491%09red
Autoimmune thyroid disease	KEGG PATHWAY	ssc05320	2	51	0.249902	0.921785	ENSSSCG00000028801|ENSSSCG00000001341	ssc:100621559|ssc:100135031|	100621559|100135031|	|SLA-2, SLA-B|	http://www.genome.jp/kegg-bin/show_pathway?ssc05320/ssc:100135031%09red/ssc:100621559%09red
Nitrogen metabolism	KEGG PATHWAY	ssc00910	1	15	0.253987	0.921785	ENSSSCG00000006233	ssc:100157869|	100157869|	CA8|	http://www.genome.jp/kegg-bin/show_pathway?ssc00910/ssc:100157869%09red
Retrograde endocannabinoid signaling	KEGG PATHWAY	ssc04723	3	95	0.262751	0.921785	ENSSSCG00000007058|ENSSSCG00000024134|ENSSSCG00000005462	ssc:100516581|ssc:100233193|ssc:100515992|	100516581|100233193|100515992|	PLCB4|MGLL|GNG10|	http://www.genome.jp/kegg-bin/show_pathway?ssc04723/ssc:100233193%09red/ssc:100515992%09red/ssc:100516581%09red
Malaria	KEGG PATHWAY	ssc05144	2	54	0.270127	0.921785	ENSSSCG00000028801|ENSSSCG00000007978	ssc:100621559|ssc:100737768|	100621559|100737768|	| |	http://www.genome.jp/kegg-bin/show_pathway?ssc05144/ssc:100737768%09red/ssc:100621559%09red
Epstein-Barr virus infection	KEGG PATHWAY	ssc05169	5	189	0.276967	0.921785	ENSSSCG00000007688|ENSSSCG00000001341|ENSSSCG00000010872|ENSSSCG00000030408|ENSSSCG00000010497	ssc:100521614|ssc:100135031|ssc:100513811|ssc:396723|ssc:397298|	100521614|100135031|100513811|396723|397298|	|SLA-2, SLA-B|AKT3|DDX58, RHIV-1, RIG-1, RIG-I, RLR-1|ENTPD1, CD39|	http://www.genome.jp/kegg-bin/show_pathway?ssc05169/ssc:100135031%09red/ssc:396723%09red/ssc:100521614%09red/ssc:100513811%09red/ssc:397298%09red
Biosynthesis of unsaturated fatty acids	KEGG PATHWAY	ssc01040	1	17	0.280826	0.921785	ENSSSCG00000013072	ssc:444997|	444997|	FADS2|	http://www.genome.jp/kegg-bin/show_pathway?ssc01040/ssc:444997%09red
Other glycan degradation	KEGG PATHWAY	ssc00511	1	17	0.280826	0.921785	ENSSSCG00000027178	ssc:396847|	396847|	MAN2B2|	http://www.genome.jp/kegg-bin/show_pathway?ssc00511/ssc:396847%09red
Pyrimidine metabolism	KEGG PATHWAY	ssc00240	3	101	0.292305	0.921785	ENSSSCG00000007688|ENSSSCG00000012146|ENSSSCG00000010497	ssc:100521614|ssc:100520595|ssc:397298|	100521614|100520595|397298|	|CTPS2|ENTPD1, CD39|	http://www.genome.jp/kegg-bin/show_pathway?ssc00240/ssc:100521614%09red/ssc:100520595%09red/ssc:397298%09red
Pantothenate and CoA biosynthesis	KEGG PATHWAY	ssc00770	1	18	0.293883	0.921785	ENSSSCG00000028817	ssc:100621671|	100621671|	|	http://www.genome.jp/kegg-bin/show_pathway?ssc00770/ssc:100621671%09red
2-Oxocarboxylic acid metabolism	KEGG PATHWAY	ssc01210	1	18	0.293883	0.921785	ENSSSCG00000023782	ssc:733641|	733641|	IDH3B|	http://www.genome.jp/kegg-bin/show_pathway?ssc01210/ssc:733641%09red
Synaptic vesicle cycle	KEGG PATHWAY	ssc04721	2	59	0.303774	0.921785	ENSSSCG00000029481|ENSSSCG00000006138	ssc:100624856|ssc:100521494|	100624856|100521494|	CPLX1|ATP6V0D2|	http://www.genome.jp/kegg-bin/show_pathway?ssc04721/ssc:100521494%09red/ssc:100624856%09red
Chemical carcinogenesis	KEGG PATHWAY	ssc05204	2	60	0.310476	0.921785	ENSSSCG00000023320|ENSSSCG00000003130	ssc:100144468|ssc:641359|	100144468|641359|	CYP3A22|SULT2A1|	http://www.genome.jp/kegg-bin/show_pathway?ssc05204/ssc:641359%09red/ssc:100144468%09red
mTOR signaling pathway	KEGG PATHWAY	ssc04150	2	60	0.310476	0.921785	ENSSSCG00000000857|ENSSSCG00000010872	ssc:397491|ssc:100513811|	397491|100513811|	IGF1, IGF-I, Npt2B|AKT3|	http://www.genome.jp/kegg-bin/show_pathway?ssc04150/ssc:397491%09red/ssc:100513811%09red
Renin-angiotensin system	KEGG PATHWAY	ssc04614	1	20	0.31929	0.921785	ENSSSCG00000012138	ssc:100144303|	100144303|	ACE2|	http://www.genome.jp/kegg-bin/show_pathway?ssc04614/ssc:100144303%09red
Chagas disease (American trypanosomiasis)	KEGG PATHWAY	ssc05142	3	108	0.327035	0.921785	ENSSSCG00000028801|ENSSSCG00000010872|ENSSSCG00000007058	ssc:100621559|ssc:100513811|ssc:100516581|	100621559|100513811|100516581|	|AKT3|PLCB4|	http://www.genome.jp/kegg-bin/show_pathway?ssc05142/ssc:100621559%09red/ssc:100513811%09red/ssc:100516581%09red
Inflammatory mediator regulation of TRP channels	KEGG PATHWAY	ssc04750	3	110	0.336967	0.921785	ENSSSCG00000003825|ENSSSCG00000000857|ENSSSCG00000007058	ssc:100524940|ssc:397491|ssc:100516581|	100524940|397491|100516581|	|IGF1, IGF-I, Npt2B|PLCB4|	http://www.genome.jp/kegg-bin/show_pathway?ssc04750/ssc:100524940%09red/ssc:397491%09red/ssc:100516581%09red
alpha-Linolenic acid metabolism	KEGG PATHWAY	ssc00592	1	22	0.343786	0.921785	ENSSSCG00000013072	ssc:444997|	444997|	FADS2|	http://www.genome.jp/kegg-bin/show_pathway?ssc00592/ssc:444997%09red
Proximal tubule bicarbonate reclamation	KEGG PATHWAY	ssc04964	1	22	0.343786	0.921785	ENSSSCG00000000401	ssc:100738224|	100738224|	GLS2|	http://www.genome.jp/kegg-bin/show_pathway?ssc04964/ssc:100738224%09red
Cholinergic synapse	KEGG PATHWAY	ssc04725	3	113	0.351847	0.921785	ENSSSCG00000010872|ENSSSCG00000007058|ENSSSCG00000005462	ssc:100513811|ssc:100516581|ssc:100515992|	100513811|100516581|100515992|	AKT3|PLCB4|GNG10|	http://www.genome.jp/kegg-bin/show_pathway?ssc04725/ssc:100515992%09red/ssc:100513811%09red/ssc:100516581%09red
Butanoate metabolism	KEGG PATHWAY	ssc00650	1	23	0.355702	0.921785	ENSSSCG00000026453	ssc:100511318|	100511318|	ACSM5|	http://www.genome.jp/kegg-bin/show_pathway?ssc00650/ssc:100511318%09red
Antigen processing and presentation	KEGG PATHWAY	ssc04612	2	68	0.363472	0.921785	ENSSSCG00000028801|ENSSSCG00000001341	ssc:100621559|ssc:100135031|	100621559|100135031|	|SLA-2, SLA-B|	http://www.genome.jp/kegg-bin/show_pathway?ssc04612/ssc:100135031%09red/ssc:100621559%09red
Vascular smooth muscle contraction	KEGG PATHWAY	ssc04270	3	117	0.371624	0.921785	ENSSSCG00000012275|ENSSSCG00000007058|ENSSSCG00000022633	ssc:397601|ssc:100516581|ssc:397601|	397601|100516581|397601|	ARAF, ARAF1|PLCB4|ARAF, ARAF1|	http://www.genome.jp/kegg-bin/show_pathway?ssc04270/ssc:397601%09red/ssc:100516581%09red
AMPK signaling pathway	KEGG PATHWAY	ssc04152	3	118	0.376552	0.921785	ENSSSCG00000003018|ENSSSCG00000000857|ENSSSCG00000010872	ssc:397583|ssc:397491|ssc:100513811|	397583|397491|100513811|	LIPE, HSL|IGF1, IGF-I, Npt2B|AKT3|	http://www.genome.jp/kegg-bin/show_pathway?ssc04152/ssc:397583%09red/ssc:397491%09red/ssc:100513811%09red
Nicotinate and nicotinamide metabolism	KEGG PATHWAY	ssc00760	1	25	0.37889	0.921785	ENSSSCG00000028817	ssc:100621671|	100621671|	|	http://www.genome.jp/kegg-bin/show_pathway?ssc00760/ssc:100621671%09red
Dopaminergic synapse	KEGG PATHWAY	ssc04728	3	120	0.386384	0.921785	ENSSSCG00000010872|ENSSSCG00000007058|ENSSSCG00000005462	ssc:100513811|ssc:100516581|ssc:100515992|	100513811|100516581|100515992|	AKT3|PLCB4|GNG10|	http://www.genome.jp/kegg-bin/show_pathway?ssc04728/ssc:100515992%09red/ssc:100513811%09red/ssc:100516581%09red
B cell receptor signaling pathway	KEGG PATHWAY	ssc04662	2	72	0.389407	0.921785	ENSSSCG00000012495|ENSSSCG00000010872	ssc:100627308|ssc:100513811|	100627308|100513811|	BTK|AKT3|	http://www.genome.jp/kegg-bin/show_pathway?ssc04662/ssc:100627308%09red/ssc:100513811%09red
Collecting duct acid secretion	KEGG PATHWAY	ssc04966	1	26	0.39017	0.921785	ENSSSCG00000006138	ssc:100521494|	100521494|	ATP6V0D2|	http://www.genome.jp/kegg-bin/show_pathway?ssc04966/ssc:100521494%09red
p53 signaling pathway	KEGG PATHWAY	ssc04115	2	73	0.395818	0.921785	ENSSSCG00000000857|ENSSSCG00000026049	ssc:397491|ssc:100626234|	397491|100626234|	IGF1, IGF-I, Npt2B| |	http://www.genome.jp/kegg-bin/show_pathway?ssc04115/ssc:100626234%09red/ssc:397491%09red
Bacterial invasion of epithelial cells	KEGG PATHWAY	ssc05100	2	73	0.395818	0.921785	ENSSSCG00000008986|ENSSSCG00000016634	ssc:100523501|ssc:404693|	100523501|404693|	SEPT11|CAV1|	http://www.genome.jp/kegg-bin/show_pathway?ssc05100/ssc:404693%09red/ssc:100523501%09red
Chemokine signaling pathway	KEGG PATHWAY	ssc04062	4	173	0.400499	0.921785	ENSSSCG00000010872|ENSSSCG00000007058|ENSSSCG00000005462|ENSSSCG00000012402	ssc:100513811|ssc:100516581|ssc:100515992|ssc:100524123|	100513811|100516581|100515992|100524123|	AKT3|PLCB4|GNG10|CXCR3|	http://www.genome.jp/kegg-bin/show_pathway?ssc04062/ssc:100524123%09red/ssc:100515992%09red/ssc:100513811%09red/ssc:100516581%09red
Phototransduction	KEGG PATHWAY	ssc04744	1	27	0.401245	0.921785	ENSSSCG00000001636	ssc:100739200|	100739200|	GUCA1A|	http://www.genome.jp/kegg-bin/show_pathway?ssc04744/ssc:100739200%09red
Salivary secretion	KEGG PATHWAY	ssc04970	2	75	0.408546	0.921785	ENSSSCG00000007058|ENSSSCG00000000492	ssc:100516581|ssc:100157211|	100516581|100157211|	PLCB4|LYZ, LYZS|	http://www.genome.jp/kegg-bin/show_pathway?ssc04970/ssc:100157211%09red/ssc:100516581%09red
Hypertrophic cardiomyopathy (HCM)	KEGG PATHWAY	ssc05410	2	78	0.427389	0.921785	ENSSSCG00000000857|ENSSSCG00000011441	ssc:397491|ssc:100156435|	397491|100156435|	IGF1, IGF-I, Npt2B|TNNC1, TNNC|	http://www.genome.jp/kegg-bin/show_pathway?ssc05410/ssc:397491%09red/ssc:100156435%09red
Citrate cycle (TCA cycle)	KEGG PATHWAY	ssc00020	1	30	0.433282	0.921785	ENSSSCG00000023782	ssc:733641|	733641|	IDH3B|	http://www.genome.jp/kegg-bin/show_pathway?ssc00020/ssc:733641%09red
Calcium signaling pathway	KEGG PATHWAY	ssc04020	4	182	0.437053	0.921785	ENSSSCG00000028801|ENSSSCG00000007058|ENSSSCG00000011441|ENSSSCG00000006030	ssc:100621559|ssc:100516581|ssc:100156435|ssc:100415777|	100621559|100516581|100156435|100415777|	|PLCB4|TNNC1, TNNC|TRHR|	http://www.genome.jp/kegg-bin/show_pathway?ssc04020/ssc:100415777%09red/ssc:100621559%09red/ssc:100156435%09red/ssc:100516581%09red
Herpes simplex infection	KEGG PATHWAY	ssc05168	4	182	0.437053	0.921785	ENSSSCG00000026049|ENSSSCG00000001341|ENSSSCG00000030408|ENSSSCG00000010453	ssc:100626234|ssc:100135031|ssc:396723|ssc:100153038|	100626234|100135031|396723|100153038|	|SLA-2, SLA-B|DDX58, RHIV-1, RIG-1, RIG-I, RLR-1|IFIT1|	http://www.genome.jp/kegg-bin/show_pathway?ssc05168/ssc:100153038%09red/ssc:100626234%09red/ssc:396723%09red/ssc:100135031%09red
Purine metabolism	KEGG PATHWAY	ssc00230	4	183	0.441078	0.921785	ENSSSCG00000028817|ENSSSCG00000007688|ENSSSCG00000016585|ENSSSCG00000010497	ssc:100621671|ssc:100521614|ssc:100520873|ssc:397298|	100621671|100521614|100520873|397298|	| |IMPDH1|ENTPD1, CD39|	http://www.genome.jp/kegg-bin/show_pathway?ssc00230/ssc:100520873%09red/ssc:100621671%09red/ssc:100521614%09red/ssc:397298%09red
Drug metabolism - other enzymes	KEGG PATHWAY	ssc00983	1	31	0.443577	0.921785	ENSSSCG00000016585	ssc:100520873|	100520873|	IMPDH1|	http://www.genome.jp/kegg-bin/show_pathway?ssc00983/ssc:100520873%09red
Platelet activation	KEGG PATHWAY	ssc04611	3	132	0.444429	0.921785	ENSSSCG00000010872|ENSSSCG00000012495|ENSSSCG00000007058	ssc:100513811|ssc:100627308|ssc:100516581|	100513811|100627308|100516581|	AKT3|BTK|PLCB4|	http://www.genome.jp/kegg-bin/show_pathway?ssc04611/ssc:100627308%09red/ssc:100513811%09red/ssc:100516581%09red
Measles	KEGG PATHWAY	ssc05162	3	133	0.449174	0.921785	ENSSSCG00000028801|ENSSSCG00000010872|ENSSSCG00000030408	ssc:100621559|ssc:100513811|ssc:396723|	100621559|100513811|396723|	|AKT3|DDX58, RHIV-1, RIG-1, RIG-I, RLR-1|	http://www.genome.jp/kegg-bin/show_pathway?ssc05162/ssc:396723%09red/ssc:100513811%09red/ssc:100621559%09red
Taste transduction	KEGG PATHWAY	ssc04742	1	33	0.463609	0.921785	ENSSSCG00000028554	ssc:100522867|	100522867|	|	http://www.genome.jp/kegg-bin/show_pathway?ssc04742/ssc:100522867%09red
Dilated cardiomyopathy	KEGG PATHWAY	ssc05414	2	84	0.464096	0.921785	ENSSSCG00000000857|ENSSSCG00000011441	ssc:397491|ssc:100156435|	397491|100156435|	IGF1, IGF-I, Npt2B|TNNC1, TNNC|	http://www.genome.jp/kegg-bin/show_pathway?ssc05414/ssc:397491%09red/ssc:100156435%09red
Huntington's disease	KEGG PATHWAY	ssc05016	4	190	0.469002	0.921785	ENSSSCG00000007688|ENSSSCG00000007058|ENSSSCG00000024144|ENSSSCG00000026049	ssc:100521614|ssc:100516581|ssc:100624738|ssc:100626234|	100521614|100516581|100624738|100626234|	|PLCB4|NDUFS7| |	http://www.genome.jp/kegg-bin/show_pathway?ssc05016/ssc:100624738%09red/ssc:100626234%09red/ssc:100521614%09red/ssc:100516581%09red
GABAergic synapse	KEGG PATHWAY	ssc04727	2	85	0.470079	0.921785	ENSSSCG00000005462|ENSSSCG00000000401	ssc:100515992|ssc:100738224|	100515992|100738224|	GNG10|GLS2|	http://www.genome.jp/kegg-bin/show_pathway?ssc04727/ssc:100738224%09red/ssc:100515992%09red
RNA polymerase	KEGG PATHWAY	ssc03020	1	34	0.473353	0.921785	ENSSSCG00000007688	ssc:100521614|	100521614|	|	http://www.genome.jp/kegg-bin/show_pathway?ssc03020/ssc:100521614%09red
Rheumatoid arthritis	KEGG PATHWAY	ssc05323	2	87	0.481924	0.921785	ENSSSCG00000028801|ENSSSCG00000006138	ssc:100621559|ssc:100521494|	100621559|100521494|	|ATP6V0D2|	http://www.genome.jp/kegg-bin/show_pathway?ssc05323/ssc:100521494%09red/ssc:100621559%09red
Adrenergic signaling in cardiomyocytes	KEGG PATHWAY	ssc04261	3	141	0.486512	0.921785	ENSSSCG00000010872|ENSSSCG00000007058|ENSSSCG00000011441	ssc:100513811|ssc:100516581|ssc:100156435|	100513811|100516581|100156435|	AKT3|PLCB4|TNNC1, TNNC|	http://www.genome.jp/kegg-bin/show_pathway?ssc04261/ssc:100156435%09red/ssc:100513811%09red/ssc:100516581%09red
Small cell lung cancer	KEGG PATHWAY	ssc05222	2	88	0.487785	0.921785	ENSSSCG00000010872|ENSSSCG00000026049	ssc:100513811|ssc:100626234|	100513811|100626234|	AKT3| |	http://www.genome.jp/kegg-bin/show_pathway?ssc05222/ssc:100626234%09red/ssc:100513811%09red
SNARE interactions in vesicular transport	KEGG PATHWAY	ssc04130	1	36	0.492316	0.921785	ENSSSCG00000007516	ssc:100144526|	100144526|	STX16|	http://www.genome.jp/kegg-bin/show_pathway?ssc04130/ssc:100144526%09red
Alanine, aspartate and glutamate metabolism	KEGG PATHWAY	ssc00250	1	36	0.492316	0.921785	ENSSSCG00000000401	ssc:100738224|	100738224|	GLS2|	http://www.genome.jp/kegg-bin/show_pathway?ssc00250/ssc:100738224%09red
Alcoholism	KEGG PATHWAY	ssc05034	3	143	0.495656	0.921785	ENSSSCG00000012275|ENSSSCG00000005462|ENSSSCG00000022633	ssc:397601|ssc:100515992|ssc:397601|	397601|100515992|397601|	ARAF, ARAF1|GNG10|ARAF, ARAF1|	http://www.genome.jp/kegg-bin/show_pathway?ssc05034/ssc:100515992%09red/ssc:397601%09red
Primary immunodeficiency	KEGG PATHWAY	ssc05340	1	37	0.50154	0.921785	ENSSSCG00000012495	ssc:100627308|	100627308|	BTK|	http://www.genome.jp/kegg-bin/show_pathway?ssc05340/ssc:100627308%09red
Apoptosis	KEGG PATHWAY	ssc04210	2	91	0.505118	0.921785	ENSSSCG00000010872|ENSSSCG00000026049	ssc:100513811|ssc:100626234|	100513811|100626234|	AKT3| |	http://www.genome.jp/kegg-bin/show_pathway?ssc04210/ssc:100626234%09red/ssc:100513811%09red
Cell adhesion molecules (CAMs)	KEGG PATHWAY	ssc04514	3	146	0.509219	0.921785	ENSSSCG00000028801|ENSSSCG00000022003|ENSSSCG00000001341	ssc:100621559|ssc:100521277|ssc:100135031|	100621559|100521277|100135031|	|PTPRF|SLA-2, SLA-B|	http://www.genome.jp/kegg-bin/show_pathway?ssc04514/ssc:100135031%09red/ssc:100521277%09red/ssc:100621559%09red
Regulation of autophagy	KEGG PATHWAY	ssc04140	1	38	0.510598	0.921785	ENSSSCG00000012569	ssc:100156732|	100156732|	ATG4A|	http://www.genome.jp/kegg-bin/show_pathway?ssc04140/ssc:100156732%09red
Hepatitis B	KEGG PATHWAY	ssc05161	3	151	0.531389	0.921785	ENSSSCG00000010872|ENSSSCG00000030408|ENSSSCG00000026049	ssc:100513811|ssc:396723|ssc:100626234|	100513811|396723|100626234|	AKT3|DDX58, RHIV-1, RIG-1, RIG-I, RLR-1| |	http://www.genome.jp/kegg-bin/show_pathway?ssc05161/ssc:100626234%09red/ssc:396723%09red/ssc:100513811%09red
Aldosterone-regulated sodium reabsorption	KEGG PATHWAY	ssc04960	1	41	0.536796	0.921785	ENSSSCG00000000857	ssc:397491|	397491|	IGF1, IGF-I, Npt2B|	http://www.genome.jp/kegg-bin/show_pathway?ssc04960/ssc:397491%09red
Rap1 signaling pathway	KEGG PATHWAY	ssc04015	4	208	0.538186	0.921785	ENSSSCG00000010872|ENSSSCG00000028801|ENSSSCG00000000857|ENSSSCG00000007058	ssc:100513811|ssc:100621559|ssc:397491|ssc:100516581|	100513811|100621559|397491|100516581|	AKT3| |IGF1, IGF-I, Npt2B|PLCB4|	http://www.genome.jp/kegg-bin/show_pathway?ssc04015/ssc:100621559%09red/ssc:397491%09red/ssc:100513811%09red/ssc:100516581%09red
Estrogen signaling pathway	KEGG PATHWAY	ssc04915	2	97	0.53862	0.921785	ENSSSCG00000010872|ENSSSCG00000007058	ssc:100513811|ssc:100516581|	100513811|100516581|	AKT3|PLCB4|	http://www.genome.jp/kegg-bin/show_pathway?ssc04915/ssc:100513811%09red/ssc:100516581%09red
Circadian entrainment	KEGG PATHWAY	ssc04713	2	98	0.54405	0.921785	ENSSSCG00000007058|ENSSSCG00000005462	ssc:100516581|ssc:100515992|	100516581|100515992|	PLCB4|GNG10|	http://www.genome.jp/kegg-bin/show_pathway?ssc04713/ssc:100515992%09red/ssc:100516581%09red
Mineral absorption	KEGG PATHWAY	ssc04978	1	42	0.545213	0.921785	ENSSSCG00000010036	ssc:397113|	397113|	SLC5A1, SGLT1|	http://www.genome.jp/kegg-bin/show_pathway?ssc04978/ssc:397113%09red
Endocrine and other factor-regulated calcium reabsorption	KEGG PATHWAY	ssc04961	1	42	0.545213	0.921785	ENSSSCG00000007058	ssc:100516581|	100516581|	PLCB4|	http://www.genome.jp/kegg-bin/show_pathway?ssc04961/ssc:100516581%09red
Basal transcription factors	KEGG PATHWAY	ssc03022	1	42	0.545213	0.921785	ENSSSCG00000006000	ssc:100155674|	100155674|	TAF2|	http://www.genome.jp/kegg-bin/show_pathway?ssc03022/ssc:100155674%09red
Intestinal immune network for IgA production	KEGG PATHWAY	ssc04672	1	44	0.561594	0.921785	ENSSSCG00000028801	ssc:100621559|	100621559|	|	http://www.genome.jp/kegg-bin/show_pathway?ssc04672/ssc:100621559%09red
Fatty acid metabolism	KEGG PATHWAY	ssc01212	1	45	0.569563	0.921785	ENSSSCG00000013072	ssc:444997|	444997|	FADS2|	http://www.genome.jp/kegg-bin/show_pathway?ssc01212/ssc:444997%09red
Non-alcoholic fatty liver disease (NAFLD)	KEGG PATHWAY	ssc04932	3	160	0.569837	0.921785	ENSSSCG00000010872|ENSSSCG00000024144|ENSSSCG00000026049	ssc:100513811|ssc:100624738|ssc:100626234|	100513811|100624738|100626234|	AKT3|NDUFS7| |	http://www.genome.jp/kegg-bin/show_pathway?ssc04932/ssc:100624738%09red/ssc:100626234%09red/ssc:100513811%09red
HIF-1 signaling pathway	KEGG PATHWAY	ssc04066	2	104	0.575686	0.921785	ENSSSCG00000000857|ENSSSCG00000010872	ssc:397491|ssc:100513811|	397491|100513811|	IGF1, IGF-I, Npt2B|AKT3|	http://www.genome.jp/kegg-bin/show_pathway?ssc04066/ssc:397491%09red/ssc:100513811%09red
Cocaine addiction	KEGG PATHWAY	ssc05030	1	46	0.577386	0.921785	ENSSSCG00000022189	ssc:100521916|	100521916|	GRM3|	http://www.genome.jp/kegg-bin/show_pathway?ssc05030/ssc:100521916%09red
Staphylococcus aureus infection	KEGG PATHWAY	ssc05150	1	47	0.585068	0.921785	ENSSSCG00000028801	ssc:100621559|	100621559|	|	http://www.genome.jp/kegg-bin/show_pathway?ssc05150/ssc:100621559%09red
Amoebiasis	KEGG PATHWAY	ssc05146	2	107	0.590893	0.921785	ENSSSCG00000002294|ENSSSCG00000007058	ssc:100155893|ssc:100516581|	100155893|100516581|	ARG2|PLCB4|	http://www.genome.jp/kegg-bin/show_pathway?ssc05146/ssc:100155893%09red/ssc:100516581%09red
T cell receptor signaling pathway	KEGG PATHWAY	ssc04660	2	107	0.590893	0.921785	ENSSSCG00000028801|ENSSSCG00000010872	ssc:100621559|ssc:100513811|	100621559|100513811|	|AKT3|	http://www.genome.jp/kegg-bin/show_pathway?ssc04660/ssc:100513811%09red/ssc:100621559%09red
Ras signaling pathway	KEGG PATHWAY	ssc04014	4	223	0.59219	0.921785	ENSSSCG00000028801|ENSSSCG00000000857|ENSSSCG00000010872|ENSSSCG00000005462	ssc:100621559|ssc:397491|ssc:100513811|ssc:100515992|	100621559|397491|100513811|100515992|	|IGF1, IGF-I, Npt2B|AKT3|GNG10|	http://www.genome.jp/kegg-bin/show_pathway?ssc04014/ssc:100515992%09red/ssc:397491%09red/ssc:100513811%09red/ssc:100621559%09red
Natural killer cell mediated cytotoxicity	KEGG PATHWAY	ssc04650	2	108	0.595871	0.921785	ENSSSCG00000012275|ENSSSCG00000022633	ssc:397601|ssc:397601|	397601|397601|	ARAF, ARAF1|ARAF, ARAF1|	http://www.genome.jp/kegg-bin/show_pathway?ssc04650/ssc:397601%09red
Metabolism of xenobiotics by cytochrome P450	KEGG PATHWAY	ssc00980	1	49	0.600017	0.921785	ENSSSCG00000003130	ssc:641359|	641359|	SULT2A1|	http://www.genome.jp/kegg-bin/show_pathway?ssc00980/ssc:641359%09red
Starch and sucrose metabolism	KEGG PATHWAY	ssc00500	1	49	0.600017	0.921785	ENSSSCG00000028817	ssc:100621671|	100621671|	|	http://www.genome.jp/kegg-bin/show_pathway?ssc00500/ssc:100621671%09red
Influenza A	KEGG PATHWAY	ssc05164	3	168	0.602333	0.921785	ENSSSCG00000010872|ENSSSCG00000030408|ENSSSCG00000026049	ssc:100513811|ssc:396723|ssc:100626234|	100513811|396723|100626234|	AKT3|DDX58, RHIV-1, RIG-1, RIG-I, RLR-1| |	http://www.genome.jp/kegg-bin/show_pathway?ssc05164/ssc:100626234%09red/ssc:396723%09red/ssc:100513811%09red
Steroid hormone biosynthesis	KEGG PATHWAY	ssc00140	1	51	0.614428	0.921785	ENSSSCG00000023320	ssc:100144468|	100144468|	CYP3A22|	http://www.genome.jp/kegg-bin/show_pathway?ssc00140/ssc:100144468%09red
Thyroid hormone signaling pathway	KEGG PATHWAY	ssc04919	2	113	0.620081	0.921785	ENSSSCG00000010872|ENSSSCG00000007058	ssc:100513811|ssc:100516581|	100513811|100516581|	AKT3|PLCB4|	http://www.genome.jp/kegg-bin/show_pathway?ssc04919/ssc:100513811%09red/ssc:100516581%09red
Tuberculosis	KEGG PATHWAY	ssc05152	3	174	0.625621	0.921785	ENSSSCG00000010872|ENSSSCG00000006138|ENSSSCG00000026049	ssc:100513811|ssc:100521494|ssc:100626234|	100513811|100521494|100626234|	AKT3|ATP6V0D2| |	http://www.genome.jp/kegg-bin/show_pathway?ssc05152/ssc:100521494%09red/ssc:100626234%09red/ssc:100513811%09red
Alzheimer's disease	KEGG PATHWAY	ssc05010	3	175	0.62941	0.921785	ENSSSCG00000007058|ENSSSCG00000024144|ENSSSCG00000026049	ssc:100516581|ssc:100624738|ssc:100626234|	100516581|100624738|100626234|	PLCB4|NDUFS7| |	http://www.genome.jp/kegg-bin/show_pathway?ssc05010/ssc:100624738%09red/ssc:100626234%09red/ssc:100516581%09red
Lysosome	KEGG PATHWAY	ssc04142	2	115	0.629447	0.921785	ENSSSCG00000006138|ENSSSCG00000000361	ssc:100521494|ssc:100155929|	100521494|100155929|	ATP6V0D2|CD63|	http://www.genome.jp/kegg-bin/show_pathway?ssc04142/ssc:100155929%09red/ssc:100521494%09red
Toxoplasmosis	KEGG PATHWAY	ssc05145	2	115	0.629447	0.921785	ENSSSCG00000010872|ENSSSCG00000026049	ssc:100513811|ssc:100626234|	100513811|100626234|	AKT3| |	http://www.genome.jp/kegg-bin/show_pathway?ssc05145/ssc:100626234%09red/ssc:100513811%09red
Retinol metabolism	KEGG PATHWAY	ssc00830	1	54	0.635079	0.921785	ENSSSCG00000023320	ssc:100144468|	100144468|	CYP3A22|	http://www.genome.jp/kegg-bin/show_pathway?ssc00830/ssc:100144468%09red
Glycerolipid metabolism	KEGG PATHWAY	ssc00561	1	54	0.635079	0.921785	ENSSSCG00000024134	ssc:100233193|	100233193|	MGLL|	http://www.genome.jp/kegg-bin/show_pathway?ssc00561/ssc:100233193%09red
Olfactory transduction	KEGG PATHWAY	ssc04740	14	810	0.636871	0.921785	ENSSSCG00000001636|ENSSSCG00000002106|ENSSSCG00000014657|ENSSSCG00000014458|ENSSSCG00000029110|ENSSSCG00000005791|ENSSSCG00000014482|ENSSSCG00000002187|ENSSSCG00000028286|ENSSSCG00000028714|ENSSSCG00000022853|ENSSSCG00000012671|ENSSSCG00000014649|ENSSSCG00000002176	ssc:100739200|ssc:100510915|ssc:100522693|ssc:100517642|ssc:100736637|ssc:100154169|ssc:100521717|ssc:100517768|ssc:100514097|ssc:100152893|ssc:100625386|ssc:100513904|ssc:100521285|ssc:100156727|	100739200|100510915|100522693|100517642|100736637|100154169|100521717|100517768|100514097|100152893|100625386|100513904|100521285|100156727|	GUCA1A| | | | | | | | | | | | | |	http://www.genome.jp/kegg-bin/show_pathway?ssc04740/ssc:100514097%09red/ssc:100152893%09red/ssc:100513904%09red/ssc:100522693%09red/ssc:100510915%09red/ssc:100739200%09red/ssc:100736637%09red/ssc:100156727%09red/ssc:100517768%09red/ssc:100521717%09red/ssc:100154169%09red/ssc:100517642%09red/ssc:100625386%09red/ssc:100521285%09red
Amyotrophic lateral sclerosis (ALS)	KEGG PATHWAY	ssc05014	1	55	0.641714	0.921785	ENSSSCG00000026049	ssc:100626234|	100626234|	|	http://www.genome.jp/kegg-bin/show_pathway?ssc05014/ssc:100626234%09red
Inositol phosphate metabolism	KEGG PATHWAY	ssc00562	1	57	0.654626	0.921785	ENSSSCG00000007058	ssc:100516581|	100516581|	PLCB4|	http://www.genome.jp/kegg-bin/show_pathway?ssc00562/ssc:100516581%09red
VEGF signaling pathway	KEGG PATHWAY	ssc04370	1	58	0.660907	0.921785	ENSSSCG00000010872	ssc:100513811|	100513811|	AKT3|	http://www.genome.jp/kegg-bin/show_pathway?ssc04370/ssc:100513811%09red
Metabolic pathways	KEGG PATHWAY	ssc01100	20	1166	0.664091	0.921785	ENSSSCG00000023320|ENSSSCG00000004408|ENSSSCG00000007307|ENSSSCG00000024134|ENSSSCG00000016585|ENSSSCG00000000401|ENSSSCG00000002294|ENSSSCG00000026049|ENSSSCG00000012146|ENSSSCG00000006138|ENSSSCG00000010433|ENSSSCG00000028817|ENSSSCG00000020848|ENSSSCG00000024144|ENSSSCG00000007688|ENSSSCG00000026453|ENSSSCG00000007058|ENSSSCG00000023782|ENSSSCG00000003825|ENSSSCG00000010855	ssc:100144468|ssc:100152155|ssc:100156145|ssc:100233193|ssc:100520873|ssc:100738224|ssc:100155893|ssc:100626234|ssc:100520595|ssc:100521494|ssc:100037303|ssc:100621671|ssc:100625451|ssc:100624738|ssc:100521614|ssc:100511318|ssc:100516581|ssc:733641|ssc:100524940|ssc:100524702|	100144468|100152155|100156145|100233193|100520873|100738224|100155893|100626234|100520595|100521494|100037303|100621671|100625451|100624738|100521614|100511318|100516581|733641|100524940|100524702|	CYP3A22|SMPD2| |MGLL|IMPDH1|GLS2|ARG2| |CTPS2|ATP6V0D2|SGMS1, SMS1| |CMBL|NDUFS7| |ACSM5|PLCB4|IDH3B| |PYCR2|	http://www.genome.jp/kegg-bin/show_pathway?ssc01100/ssc:100233193%09red/ssc:100524702%09red/ssc:100521614%09red/ssc:100625451%09red/ssc:100155893%09red/ssc:100516581%09red/ssc:100520873%09red/ssc:100738224%09red/ssc:100521494%09red/ssc:100156145%09red/ssc:100152155%09red/ssc:100511318%09red/ssc:100037303%09red/ssc:100520595%09red/ssc:100524940%09red/ssc:100144468%09red/ssc:100624738%09red/ssc:100…
Cytosolic DNA-sensing pathway	KEGG PATHWAY	ssc04623	1	61	0.679074	0.921785	ENSSSCG00000030408	ssc:396723|	396723|	DDX58, RHIV-1, RIG-1, RIG-I, RLR-1|	http://www.genome.jp/kegg-bin/show_pathway?ssc04623/ssc:396723%09red
Arachidonic acid metabolism	KEGG PATHWAY	ssc00590	1	62	0.684912	0.921785	ENSSSCG00000003825	ssc:100524940|	100524940|	|	http://www.genome.jp/kegg-bin/show_pathway?ssc00590/ssc:100524940%09red
Inflammatory bowel disease (IBD)	KEGG PATHWAY	ssc05321	1	62	0.684912	0.921785	ENSSSCG00000028801	ssc:100621559|	100621559|	|	http://www.genome.jp/kegg-bin/show_pathway?ssc05321/ssc:100621559%09red
Wnt signaling pathway	KEGG PATHWAY	ssc04310	2	128	0.685976	0.921785	ENSSSCG00000017756|ENSSSCG00000007058	ssc:100620270|ssc:100516581|	100620270|100516581|	|PLCB4|	http://www.genome.jp/kegg-bin/show_pathway?ssc04310/ssc:100620270%09red/ssc:100516581%09red
Legionellosis	KEGG PATHWAY	ssc05134	1	64	0.69627	0.921785	ENSSSCG00000026049	ssc:100626234|	100626234|	|	http://www.genome.jp/kegg-bin/show_pathway?ssc05134/ssc:100626234%09red
Focal adhesion	KEGG PATHWAY	ssc04510	3	194	0.696336	0.921785	ENSSSCG00000000857|ENSSSCG00000010872|ENSSSCG00000016634	ssc:397491|ssc:100513811|ssc:404693|	397491|100513811|404693|	IGF1, IGF-I, Npt2B|AKT3|CAV1|	http://www.genome.jp/kegg-bin/show_pathway?ssc04510/ssc:404693%09red/ssc:397491%09red/ssc:100513811%09red
Signaling pathways regulating pluripotency of stem cells	KEGG PATHWAY	ssc04550	2	132	0.701886	0.921785	ENSSSCG00000000857|ENSSSCG00000010872	ssc:397491|ssc:100513811|	397491|100513811|	IGF1, IGF-I, Npt2B|AKT3|	http://www.genome.jp/kegg-bin/show_pathway?ssc04550/ssc:397491%09red/ssc:100513811%09red
Pathways in cancer	KEGG PATHWAY	ssc05200	5	319	0.702434	0.921785	ENSSSCG00000000857|ENSSSCG00000012275|ENSSSCG00000010872|ENSSSCG00000022633|ENSSSCG00000026049	ssc:397491|ssc:397601|ssc:100513811|ssc:397601|ssc:100626234|	397491|397601|100513811|397601|100626234|	IGF1, IGF-I, Npt2B|ARAF, ARAF1|AKT3|ARAF, ARAF1| |	http://www.genome.jp/kegg-bin/show_pathway?ssc05200/ssc:100626234%09red/ssc:397491%09red/ssc:397601%09red/ssc:100513811%09red
Osteoclast differentiation	KEGG PATHWAY	ssc04380	2	133	0.705758	0.921785	ENSSSCG00000012495|ENSSSCG00000010872	ssc:100627308|ssc:100513811|	100627308|100513811|	BTK|AKT3|	http://www.genome.jp/kegg-bin/show_pathway?ssc04380/ssc:100627308%09red/ssc:100513811%09red
Regulation of actin cytoskeleton	KEGG PATHWAY	ssc04810	3	198	0.709199	0.921785	ENSSSCG00000014087|ENSSSCG00000012275|ENSSSCG00000022633	ssc:100157656|ssc:397601|ssc:397601|	100157656|397601|397601|	IQGAP1|ARAF, ARAF1|ARAF, ARAF1|	http://www.genome.jp/kegg-bin/show_pathway?ssc04810/ssc:100157656%09red/ssc:397601%09red
Oxidative phosphorylation	KEGG PATHWAY	ssc00190	2	134	0.709587	0.921785	ENSSSCG00000006138|ENSSSCG00000024144	ssc:100521494|ssc:100624738|	100521494|100624738|	ATP6V0D2|NDUFS7|	http://www.genome.jp/kegg-bin/show_pathway?ssc00190/ssc:100624738%09red/ssc:100521494%09red
Prolactin signaling pathway	KEGG PATHWAY	ssc04917	1	67	0.712547	0.921785	ENSSSCG00000010872	ssc:100513811|	100513811|	AKT3|	http://www.genome.jp/kegg-bin/show_pathway?ssc04917/ssc:100513811%09red
PPAR signaling pathway	KEGG PATHWAY	ssc03320	1	68	0.717777	0.921785	ENSSSCG00000013072	ssc:444997|	444997|	FADS2|	http://www.genome.jp/kegg-bin/show_pathway?ssc03320/ssc:444997%09red
Adipocytokine signaling pathway	KEGG PATHWAY	ssc04920	1	70	0.727953	0.921785	ENSSSCG00000010872	ssc:100513811|	100513811|	AKT3|	http://www.genome.jp/kegg-bin/show_pathway?ssc04920/ssc:100513811%09red
Thyroid hormone synthesis	KEGG PATHWAY	ssc04918	1	72	0.737763	0.921785	ENSSSCG00000007058	ssc:100516581|	100516581|	PLCB4|	http://www.genome.jp/kegg-bin/show_pathway?ssc04918/ssc:100516581%09red
Ribosome	KEGG PATHWAY	ssc03010	2	143	0.742208	0.921785	ENSSSCG00000022842|ENSSSCG00000030578	ssc:100525692|ssc:100155047|	100525692|100155047|	|MRPL15|	http://www.genome.jp/kegg-bin/show_pathway?ssc03010/ssc:100155047%09red/ssc:100525692%09red
Cardiac muscle contraction	KEGG PATHWAY	ssc04260	1	73	0.742535	0.921785	ENSSSCG00000011441	ssc:100156435|	100156435|	TNNC1, TNNC|	http://www.genome.jp/kegg-bin/show_pathway?ssc04260/ssc:100156435%09red
Complement and coagulation cascades	KEGG PATHWAY	ssc04610	1	73	0.742535	0.921785	ENSSSCG00000023693	ssc:396954|	396954|	PROC|	http://www.genome.jp/kegg-bin/show_pathway?ssc04610/ssc:396954%09red
Gastric acid secretion	KEGG PATHWAY	ssc04971	1	74	0.747221	0.921785	ENSSSCG00000007058	ssc:100516581|	100516581|	PLCB4|	http://www.genome.jp/kegg-bin/show_pathway?ssc04971/ssc:100516581%09red
Phagosome	KEGG PATHWAY	ssc04145	2	147	0.755672	0.921785	ENSSSCG00000006138|ENSSSCG00000001341	ssc:100521494|ssc:100135031|	100521494|100135031|	ATP6V0D2|SLA-2, SLA-B|	http://www.genome.jp/kegg-bin/show_pathway?ssc04145/ssc:100521494%09red/ssc:100135031%09red
Parkinson's disease	KEGG PATHWAY	ssc05012	2	151	0.768526	0.921785	ENSSSCG00000024144|ENSSSCG00000026049	ssc:100624738|ssc:100626234|	100624738|100626234|	NDUFS7| |	http://www.genome.jp/kegg-bin/show_pathway?ssc05012/ssc:100624738%09red/ssc:100626234%09red
Phosphatidylinositol signaling system	KEGG PATHWAY	ssc04070	1	79	0.769402	0.921785	ENSSSCG00000007058	ssc:100516581|	100516581|	PLCB4|	http://www.genome.jp/kegg-bin/show_pathway?ssc04070/ssc:100516581%09red
Protein digestion and absorption	KEGG PATHWAY	ssc04974	1	80	0.7736	0.921785	ENSSSCG00000012138	ssc:100144303|	100144303|	ACE2|	http://www.genome.jp/kegg-bin/show_pathway?ssc04974/ssc:100144303%09red
Peroxisome	KEGG PATHWAY	ssc04146	1	80	0.7736	0.921785	ENSSSCG00000002697	ssc:100519193|	100519193|	NUDT7|	http://www.genome.jp/kegg-bin/show_pathway?ssc04146/ssc:100519193%09red
Jak-STAT signaling pathway	KEGG PATHWAY	ssc04630	2	153	0.77473	0.921785	ENSSSCG00000010872|ENSSSCG00000005136	ssc:100513811|ssc:100125969|	100513811|100125969|	AKT3|IFNE, IFN-epsilon, IFNE1|	http://www.genome.jp/kegg-bin/show_pathway?ssc04630/ssc:100513811%09red/ssc:100125969%09red
Fc gamma R-mediated phagocytosis	KEGG PATHWAY	ssc04666	1	81	0.777721	0.921785	ENSSSCG00000010872	ssc:100513811|	100513811|	AKT3|	http://www.genome.jp/kegg-bin/show_pathway?ssc04666/ssc:100513811%09red
Cytokine-cytokine receptor interaction	KEGG PATHWAY	ssc04060	3	223	0.78024	0.921785	ENSSSCG00000030870|ENSSSCG00000005136|ENSSSCG00000012402	ssc:100622025|ssc:100125969|ssc:100524123|	100622025|100125969|100524123|	TNFRSF18|IFNE, IFN-epsilon, IFNE1|CXCR3|	http://www.genome.jp/kegg-bin/show_pathway?ssc04060/ssc:100524123%09red/ssc:100622025%09red/ssc:100125969%09red
Transcriptional misregulation in cancer	KEGG PATHWAY	ssc05202	2	156	0.783763	0.921785	ENSSSCG00000028801|ENSSSCG00000000857	ssc:100621559|ssc:397491|	100621559|397491|	|IGF1, IGF-I, Npt2B|	http://www.genome.jp/kegg-bin/show_pathway?ssc05202/ssc:397491%09red/ssc:100621559%09red
GnRH signaling pathway	KEGG PATHWAY	ssc04912	1	86	0.797231	0.922779	ENSSSCG00000007058	ssc:100516581|	100516581|	PLCB4|	http://www.genome.jp/kegg-bin/show_pathway?ssc04912/ssc:100516581%09red
Protein processing in endoplasmic reticulum	KEGG PATHWAY	ssc04141	2	162	0.800881	0.922779	ENSSSCG00000030084|ENSSSCG00000002846	ssc:100626899|ssc:100521133|	100626899|100521133|	|DNAJA2|	http://www.genome.jp/kegg-bin/show_pathway?ssc04141/ssc:100521133%09red/ssc:100626899%09red
Pancreatic secretion	KEGG PATHWAY	ssc04972	1	87	0.800923	0.922779	ENSSSCG00000007058	ssc:100516581|	100516581|	PLCB4|	http://www.genome.jp/kegg-bin/show_pathway?ssc04972/ssc:100516581%09red
Gap junction	KEGG PATHWAY	ssc04540	1	90	0.811602	0.922779	ENSSSCG00000007058	ssc:100516581|	100516581|	PLCB4|	http://www.genome.jp/kegg-bin/show_pathway?ssc04540/ssc:100516581%09red
Morphine addiction	KEGG PATHWAY	ssc05032	1	90	0.811602	0.922779	ENSSSCG00000005462	ssc:100515992|	100515992|	GNG10|	http://www.genome.jp/kegg-bin/show_pathway?ssc05032/ssc:100515992%09red
cGMP-PKG signaling pathway	KEGG PATHWAY	ssc04022	2	167	0.814217	0.922779	ENSSSCG00000010872|ENSSSCG00000007058	ssc:100513811|ssc:100516581|	100513811|100516581|	AKT3|PLCB4|	http://www.genome.jp/kegg-bin/show_pathway?ssc04022/ssc:100513811%09red/ssc:100516581%09red
Melanogenesis	KEGG PATHWAY	ssc04916	1	95	0.828145	0.93291	ENSSSCG00000007058	ssc:100516581|	100516581|	PLCB4|	http://www.genome.jp/kegg-bin/show_pathway?ssc04916/ssc:100516581%09red
Carbon metabolism	KEGG PATHWAY	ssc01200	1	99	0.840329	0.933788	ENSSSCG00000023782	ssc:733641|	733641|	IDH3B|	http://www.genome.jp/kegg-bin/show_pathway?ssc01200/ssc:733641%09red
HTLV-I infection	KEGG PATHWAY	ssc05166	3	253	0.845978	0.933788	ENSSSCG00000028801|ENSSSCG00000010872|ENSSSCG00000001341	ssc:100621559|ssc:100513811|ssc:100135031|	100621559|100513811|100135031|	|AKT3|SLA-2, SLA-B|	http://www.genome.jp/kegg-bin/show_pathway?ssc05166/ssc:100135031%09red/ssc:100513811%09red/ssc:100621559%09red
Toll-like receptor signaling pathway	KEGG PATHWAY	ssc04620	1	101	0.846094	0.933788	ENSSSCG00000010872	ssc:100513811|	100513811|	AKT3|	http://www.genome.jp/kegg-bin/show_pathway?ssc04620/ssc:100513811%09red
Systemic lupus erythematosus	KEGG PATHWAY	ssc05322	1	102	0.848898	0.933788	ENSSSCG00000028801	ssc:100621559|	100621559|	|	http://www.genome.jp/kegg-bin/show_pathway?ssc05322/ssc:100621559%09red
Oocyte meiosis	KEGG PATHWAY	ssc04114	1	107	0.862173	0.937325	ENSSSCG00000000857	ssc:397491|	397491|	IGF1, IGF-I, Npt2B|	http://www.genome.jp/kegg-bin/show_pathway?ssc04114/ssc:397491%09red
Viral carcinogenesis	KEGG PATHWAY	ssc05203	2	189	0.863867	0.937325	ENSSSCG00000006138|ENSSSCG00000001341	ssc:100521494|ssc:100135031|	100521494|100135031|	ATP6V0D2|SLA-2, SLA-B|	http://www.genome.jp/kegg-bin/show_pathway?ssc05203/ssc:100521494%09red/ssc:100135031%09red
TNF signaling pathway	KEGG PATHWAY	ssc04668	1	109	0.867151	0.937325	ENSSSCG00000010872	ssc:100513811|	100513811|	AKT3|	http://www.genome.jp/kegg-bin/show_pathway?ssc04668/ssc:100513811%09red
cAMP signaling pathway	KEGG PATHWAY	ssc04024	2	201	0.885524	0.938751	ENSSSCG00000003018|ENSSSCG00000010872	ssc:397583|ssc:100513811|	397583|100513811|	LIPE, HSL|AKT3|	http://www.genome.jp/kegg-bin/show_pathway?ssc04024/ssc:397583%09red/ssc:100513811%09red
Neurotrophin signaling pathway	KEGG PATHWAY	ssc04722	1	118	0.887423	0.938751	ENSSSCG00000010872	ssc:100513811|	100513811|	AKT3|	http://www.genome.jp/kegg-bin/show_pathway?ssc04722/ssc:100513811%09red
Axon guidance	KEGG PATHWAY	ssc04360	1	119	0.889476	0.938751	ENSSSCG00000009584	ssc:100152598|	100152598|	SEMA4D|	http://www.genome.jp/kegg-bin/show_pathway?ssc04360/ssc:100152598%09red
Leukocyte transendothelial migration	KEGG PATHWAY	ssc04670	1	119	0.889476	0.938751	ENSSSCG00000015122	ssc:100271931|	100271931|	THY1, CD90|	http://www.genome.jp/kegg-bin/show_pathway?ssc04670/ssc:100271931%09red
Endocytosis	KEGG PATHWAY	ssc04144	2	206	0.89357	0.938751	ENSSSCG00000016634|ENSSSCG00000001341	ssc:404693|ssc:100135031|	404693|100135031|	CAV1|SLA-2, SLA-B|	http://www.genome.jp/kegg-bin/show_pathway?ssc04144/ssc:404693%09red/ssc:100135031%09red
Tight junction	KEGG PATHWAY	ssc04530	1	129	0.908056	0.943369	ENSSSCG00000010872	ssc:100513811|	100513811|	AKT3|	http://www.genome.jp/kegg-bin/show_pathway?ssc04530/ssc:100513811%09red
Spliceosome	KEGG PATHWAY	ssc03040	1	129	0.908056	0.943369	ENSSSCG00000005428	ssc:768103|	768103|	HNRNPA1, HNRPA1, ROA1|	http://www.genome.jp/kegg-bin/show_pathway?ssc03040/ssc:768103%09red
Ubiquitin mediated proteolysis	KEGG PATHWAY	ssc04120	1	134	0.916142	0.946512	ENSSSCG00000030084	ssc:100626899|	100626899|	|	http://www.genome.jp/kegg-bin/show_pathway?ssc04120/ssc:100626899%09red
MicroRNAs in cancer	KEGG PATHWAY	ssc05206	2	228	0.923106	0.948466	ENSSSCG00000006132|ENSSSCG00000000401	ssc:100153257|ssc:100738224|	100153257|100738224|	MMP16|GLS2|	http://www.genome.jp/kegg-bin/show_pathway?ssc05206/ssc:100738224%09red/ssc:100153257%09red
RNA transport	KEGG PATHWAY	ssc03013	1	149	0.936387	0.954111	ENSSSCG00000016345	ssc:100155084|	100155084|	XPO5|	http://www.genome.jp/kegg-bin/show_pathway?ssc03013/ssc:100155084%09red
PI3K-Akt signaling pathway	KEGG PATHWAY	ssc04151	3	328	0.94109	0.954111	ENSSSCG00000000857|ENSSSCG00000010872|ENSSSCG00000005462	ssc:397491|ssc:100513811|ssc:100515992|	397491|100513811|100515992|	IGF1, IGF-I, Npt2B|AKT3|GNG10|	http://www.genome.jp/kegg-bin/show_pathway?ssc04151/ssc:100515992%09red/ssc:397491%09red/ssc:100513811%09red
MAPK signaling pathway	KEGG PATHWAY	ssc04010	2	249	0.943955	0.954111	ENSSSCG00000017756|ENSSSCG00000010872	ssc:100620270|ssc:100513811|	100620270|100513811|	|AKT3|	http://www.genome.jp/kegg-bin/show_pathway?ssc04010/ssc:100620270%09red/ssc:100513811%09red
Oxytocin signaling pathway	KEGG PATHWAY	ssc04921	1	161	0.949009	0.954111	ENSSSCG00000007058	ssc:100516581|	100516581|	PLCB4|	http://www.genome.jp/kegg-bin/show_pathway?ssc04921/ssc:100516581%09red
Neuroactive ligand-receptor interaction	KEGG PATHWAY	ssc04080	2	268	0.958087	0.958087	ENSSSCG00000006030|ENSSSCG00000022189	ssc:100415777|ssc:100521916|	100415777|100521916|	TRHR|GRM3|	http://www.genome.jp/kegg-bin/show_pathway?ssc04080/ssc:100415777%09red/ssc:100521916%09red
--------------------
#Term	Database	ID	Input number	Background number	P-Value	Corrected P-Value	Input	KO	Entrez_ID	KO_name	Hyperlink
--------------------
#Term	Database	ID	Input number	Background number	P-Value	Corrected P-Value	Input	KO	Entrez_ID	KO_name	Hyperlink
--------------------

## Sheet: VR2332 Up
##Databases: KEGG PATHWAY
##Statistical test method: hypergeometric test / Fisher's exact test
##FDR correction method: Benjamini and Hochberg
#Term	Database	ID	Input number	Background number	P-Value	Corrected P-Value	Input	KO	Entrez_ID	KO_name	Hyperlink
Ribosome	KEGG PATHWAY	ssc03010	41	143	2.82428e-07	7.45611e-05	ENSSSCG00000013002|ENSSSCG00000029830|ENSSSCG00000020817|ENSSSCG00000011856|ENSSSCG00000012405|ENSSSCG00000011266|ENSSSCG00000027573|ENSSSCG00000027637|ENSSSCG00000001543|ENSSSCG00000004945|ENSSSCG00000002529|ENSSSCG00000003347|ENSSSCG00000003367|ENSSSCG00000012842|ENSSSCG00000009750|ENSSSCG00000013907|ENSSSCG00000006081|ENSSSCG00000017509|ENSSSCG00000009019|ENSSSCG00000003165|ENSSSCG00000027353|…	ssc:396977|ssc:100154456|ssc:414397|ssc:100514796|ssc:397611|ssc:641351|ssc:396993|ssc:414419|ssc:100037993|ssc:100038029|ssc:100037996|ssc:100511022|ssc:397047|ssc:100513643|ssc:100037993|ssc:397418|ssc:100156811|ssc:396989|ssc:414390|ssc:100513660|ssc:100736789|ssc:100038023|ssc:100625069|ssc:100513028|ssc:396980|ssc:414395|ssc:100525692|ssc:100155444|ssc:100625001|ssc:414422|ssc:100626973|ssc:…	396977|100154456|414397|100514796|397611|641351|396993|414419|100037993|100038029|100037996|100511022|397047|100513643|100037993|397418|100156811|396989|414390|100513660|100736789|100038023|100625069|100513028|396980|414395|100525692|100155444|100625001|414422|100626973|397598|641351|100037997|414416|100518254|733671|100512647|100628232|100519932|100514637|	FAU|RPL8|RPS16|RPL35A|RPS4, Rps4x|RPSA, LAMR1|RPL29, RPL29/HIP|RPL32|RPL10A| |RPS21|MRPL20|HBP15/L22, Rpl22|RPLP2|RPL10A|UBA52, UBCEP2|RPL30|RPL19|RPS3A|RPS11| |RPS6|MRPL19| |RPS18|RPS20| |RPS10|RPL17|RPL11|RPL37|RPL35|RPSA, LAMR1|RPS26|RPL12|RPS19|RPS3|RPL36|RPL13|MRPL36|RPS27A|	http://www.genome.jp/kegg-bin/show_pathway?ssc03010/ssc:100037997%09red/ssc:100514637%09red/ssc:414397%09red/ssc:100511022%09red/ssc:414395%09red/ssc:414390%09red/ssc:100628232%09red/ssc:100736789%09red/ssc:397598%09red/ssc:397611%09red/ssc:396977%09red/ssc:100037993%09red/ssc:641351%09red/ssc:397047%09red/ssc:100155444%09red/ssc:396980%09red/ssc:100513660%09red/ssc:396989%09red/ssc:100512647%09r…
Bacterial invasion of epithelial cells	KEGG PATHWAY	ssc05100	22	73	8.3092e-05	0.0109681	ENSSSCG00000022080|ENSSSCG00000028968|ENSSSCG00000003577|ENSSSCG00000022486|ENSSSCG00000028355|ENSSSCG00000011552|ENSSSCG00000014339|ENSSSCG00000015560|ENSSSCG00000017666|ENSSSCG00000009821|ENSSSCG00000015115|ENSSSCG00000021349|ENSSSCG00000022659|ENSSSCG00000010313|ENSSSCG00000016656|ENSSSCG00000011884|ENSSSCG00000003395|ENSSSCG00000014058|ENSSSCG00000007334|ENSSSCG00000000293|ENSSSCG00000007585|…	ssc:396849|ssc:100627149|ssc:100512789|ssc:100621690|ssc:397653|ssc:100155875|ssc:100523778|ssc:100174965|ssc:100271929|ssc:100154518|ssc:100518854|ssc:396974|ssc:100271929|ssc:396974|ssc:100522109|ssc:100521992|ssc:100518131|ssc:100525860|ssc:100154503|ssc:100155091|ssc:414396|ssc:100521464|	396849|100627149|100512789|100621690|397653|100155875|100523778|100174965|100271929|100154518|100518854|396974|100271929|396974|100522109|100521992|100518131|100525860|100154503|100155091|414396|100521464|	RHOA|RAC1|WASF2|CBLB|ACTB|ARPC4|CTNNA1|ARPC5|CLTC|ARPC3|CBL|VCL|CLTC|VCL|ELMO1|HCLS1|PIK3CD|CLTB|SRC, c-Src|ITGA5|ACTB|ARHGAP10|	http://www.genome.jp/kegg-bin/show_pathway?ssc05100/ssc:100154503%09red/ssc:100522109%09red/ssc:100521464%09red/ssc:100525860%09red/ssc:414396%09red/ssc:100512789%09red/ssc:100155875%09red/ssc:100521992%09red/ssc:396974%09red/ssc:100518854%09red/ssc:100271929%09red/ssc:397653%09red/ssc:100518131%09red/ssc:100627149%09red/ssc:100621690%09red/ssc:396849%09red/ssc:100174965%09red/ssc:100155091%09red…
Herpes simplex infection	KEGG PATHWAY	ssc05168	38	182	0.000301042	0.0264917	ENSSSCG00000030066|ENSSSCG00000000396|ENSSSCG00000015801|ENSSSCG00000012793|ENSSSCG00000024771|ENSSSCG00000009881|ENSSSCG00000000068|ENSSSCG00000017983|ENSSSCG00000028278|ENSSSCG00000001414|ENSSSCG00000024161|ENSSSCG00000016263|ENSSSCG00000002525|ENSSSCG00000010548|ENSSSCG00000016714|ENSSSCG00000025026|ENSSSCG00000017626|ENSSSCG00000007655|ENSSSCG00000020893|ENSSSCG00000008208|ENSSSCG00000024694|…	ssc:397422|ssc:396923|ssc:100037937|ssc:100523834|ssc:100623776|ssc:595128|ssc:100156226|ssc:100620648|ssc:100737040|ssc:397211|ssc:396650|ssc:100516940|ssc:100156979|ssc:100135662|ssc:100170131|ssc:100739353|ssc:654327|ssc:100515475|ssc:733649|ssc:100513348|ssc:100626452|ssc:100523731|ssc:396646|ssc:100135031|ssc:100524813|ssc:396610|ssc:100135665|ssc:100153038|ssc:397422|ssc:396723|ssc:10003728…	397422|396923|100037937|100523834|100623776|595128|100156226|100620648|100737040|397211|396650|100516940|100156979|100135662|100170131|100739353|654327|100515475|733649|100513348|100626452|100523731|396646|100135031|100524813|396610|100135665|100153038|397422|396723|100037289|396655|100156182|406188|396623|396623|733650|100157336|	CCL2, MCP-1|STAT2|TLR3, TLR-3|HCFC1| |OAS2|EP300|PER1|POLR2A|CSNK2B, CK2N, CKII_beta|SLA-7|SP100|TRAF3, TRAF3_TV1|CHUK, IKK-alpha|CYCS, CYC| |SRSF1, SFRS1| |TAP1|EIF2AK3|TAF4| |MYD88|SLA-2, SLA-B|DAXX|MAPK8, JNK, JNK1|RELA|IFIT1|CCL2, MCP-1|DDX58, RHIV-1, RIG-1, RIG-I, RLR-1|IRF7|STAT1|TAB2|NFKBIA, ECI-6/IKBA, IKBA|TLR2|TLR2|TAP2|PML|	http://www.genome.jp/kegg-bin/show_pathway?ssc05168/ssc:100737040%09red/ssc:100153038%09red/ssc:100739353%09red/ssc:100515475%09red/ssc:100037937%09red/ssc:100626452%09red/ssc:100156226%09red/ssc:595128%09red/ssc:100524813%09red/ssc:100170131%09red/ssc:733649%09red/ssc:396723%09red/ssc:100513348%09red/ssc:100156182%09red/ssc:396646%09red/ssc:396623%09red/ssc:100623776%09red/ssc:100523731%09red/ss…
Lysine degradation	KEGG PATHWAY	ssc00310	15	50	0.00111414	0.0735333	ENSSSCG00000022734|ENSSSCG00000011332|ENSSSCG00000006508|ENSSSCG00000015820|ENSSSCG00000010790|ENSSSCG00000029082|ENSSSCG00000002895|ENSSSCG00000020663|ENSSSCG00000008571|ENSSSCG00000023324|ENSSSCG00000016743|ENSSSCG00000014044|ENSSSCG00000007782|ENSSSCG00000009806|ENSSSCG00000006324	ssc:100514805|ssc:100623101|ssc:100155920|ssc:100520868|ssc:100156927|ssc:100628131|ssc:100520742|ssc:100514805|ssc:397012|ssc:100623006|ssc:100515636|ssc:100524976|ssc:100511747|ssc:100156137|ssc:100153809|	100514805|100623101|100155920|100520868|100156927|100628131|100520742|100514805|397012|100623006|100515636|100524976|100511747|100156137|100153809|	KMT2C, MLL3|SETD2|ASH1L|WHSC1L1|ECHS1|KMT2E, MLL5|KMT2B|KMT2C, MLL3|HADHA|KMT2A, MLL|OGDH|NSD1|SETD1A|SETD1B|ALDH9A1|	http://www.genome.jp/kegg-bin/show_pathway?ssc00310/ssc:100511747%09red/ssc:100153809%09red/ssc:100623006%09red/ssc:100155920%09red/ssc:100520742%09red/ssc:100520868%09red/ssc:100515636%09red/ssc:100524976%09red/ssc:100514805%09red/ssc:397012%09red/ssc:100623101%09red/ssc:100156927%09red/ssc:100156137%09red/ssc:100628131%09red
Influenza A	KEGG PATHWAY	ssc05164	33	168	0.00174822	0.0923061	ENSSSCG00000030066|ENSSSCG00000000396|ENSSSCG00000015801|ENSSSCG00000012117|ENSSSCG00000024771|ENSSSCG00000009881|ENSSSCG00000000068|ENSSSCG00000008977|ENSSSCG00000007585|ENSSSCG00000028355|ENSSSCG00000016714|ENSSSCG00000025026|ENSSSCG00000013784|ENSSSCG00000020906|ENSSSCG00000009637|ENSSSCG00000008208|ENSSSCG00000003395|ENSSSCG00000028711|ENSSSCG00000025181|ENSSSCG00000011251|ENSSSCG00000008648|…	ssc:397422|ssc:396923|ssc:100037937|ssc:100037296|ssc:100623776|ssc:595128|ssc:100156226|ssc:494019|ssc:414396|ssc:397653|ssc:100170131|ssc:100739353|ssc:396741|ssc:406191|ssc:100624226|ssc:100513348|ssc:100518131|ssc:397319|ssc:100523731|ssc:396646|ssc:396752|ssc:396610|ssc:100135665|ssc:100523784|ssc:396655|ssc:397422|ssc:396723|ssc:100037289|ssc:397128|ssc:406188|ssc:100622285|ssc:100518643|ss…	397422|396923|100037937|100037296|100623776|595128|100156226|494019|414396|397653|100170131|100739353|396741|406191|100624226|100513348|100518131|397319|100523731|396646|396752|396610|100135665|100523784|396655|397422|396723|100037289|397128|406188|100622285|100518643|100157336|	CCL2, MCP-1|STAT2|TLR3, TLR-3|TLR7| |OAS2|EP300|CXCL10|ACTB|ACTB|CYCS, CYC| |DNAJB1, HSPF1|TNFSF10, TRAIL| |EIF2AK3|PIK3CD|CASP1| |MYD88|RSAD2, CIG6, IRG6|MAPK8, JNK, JNK1|RELA|ADAR|STAT1|CCL2, MCP-1|DDX58, RHIV-1, RIG-1, RIG-I, RLR-1|IRF7|MX1, Mx, MxA|NFKBIA, ECI-6/IKBA, IKBA| |IL33, IL-33|PML|	http://www.genome.jp/kegg-bin/show_pathway?ssc05164/ssc:100739353%09red/ssc:414396%09red/ssc:406191%09red/ssc:100156226%09red/ssc:397653%09red/ssc:595128%09red/ssc:100523784%09red/ssc:100170131%09red/ssc:396723%09red/ssc:100037296%09red/ssc:100513348%09red/ssc:397319%09red/ssc:396646%09red/ssc:397128%09red/ssc:396741%09red/ssc:100622285%09red/ssc:100518131%09red/ssc:100623776%09red/ssc:100523731%…
Measles	KEGG PATHWAY	ssc05162	27	133	0.00294229	0.125782	ENSSSCG00000000396|ENSSSCG00000012117|ENSSSCG00000012853|ENSSSCG00000009881|ENSSSCG00000029724|ENSSSCG00000001414|ENSSSCG00000030408|ENSSSCG00000012397|ENSSSCG00000017403|ENSSSCG00000010548|ENSSSCG00000025026|ENSSSCG00000020906|ENSSSCG00000009637|ENSSSCG00000008208|ENSSSCG00000003395|ENSSSCG00000025181|ENSSSCG00000011251|ENSSSCG00000012981|ENSSSCG00000006543|ENSSSCG00000004421|ENSSSCG00000012077|…	ssc:396923|ssc:100037296|ssc:100037289|ssc:595128|ssc:397605|ssc:397211|ssc:396723|ssc:397156|ssc:733648|ssc:100135662|ssc:100739353|ssc:406191|ssc:100624226|ssc:100513348|ssc:100518131|ssc:100523731|ssc:396646|ssc:100135665|ssc:100523784|ssc:791125|ssc:397128|ssc:100156182|ssc:406188|ssc:396623|ssc:396623|ssc:100170134|ssc:396655|	396923|100037296|100037289|595128|397605|397211|396723|397156|733648|100135662|100739353|406191|100624226|100513348|100518131|100523731|396646|100135665|100523784|791125|397128|100156182|406188|396623|396623|100170134|396655|	STAT2|TLR7|IRF7|OAS2|GNB2L1|CSNK2B, CK2N, CKII_beta|DDX58, RHIV-1, RIG-1, RIG-I, RLR-1|IL2RG|STAT3|CHUK, IKK-alpha| |TNFSF10, TRAIL| |EIF2AK3|PIK3CD| |MYD88|RELA|ADAR|FYN, PKC|MX1, Mx, MxA|TAB2|NFKBIA, ECI-6/IKBA, IKBA|TLR2|TLR2|CD209, DC-SIGN|STAT1|	http://www.genome.jp/kegg-bin/show_pathway?ssc05162/ssc:791125%09red/ssc:100739353%09red/ssc:406191%09red/ssc:595128%09red/ssc:100523784%09red/ssc:100170134%09red/ssc:733648%09red/ssc:396723%09red/ssc:100037296%09red/ssc:100513348%09red/ssc:100156182%09red/ssc:396646%09red/ssc:396623%09red/ssc:397128%09red/ssc:100523731%09red/ssc:100135665%09red/ssc:396923%09red/ssc:100135662%09red/ssc:397156%09r…
Toll-like receptor signaling pathway	KEGG PATHWAY	ssc04620	22	101	0.00333512	0.125782	ENSSSCG00000028968|ENSSSCG00000015801|ENSSSCG00000024771|ENSSSCG00000012117|ENSSSCG00000008978|ENSSSCG00000008977|ENSSSCG00000012118|ENSSSCG00000002525|ENSSSCG00000016573|ENSSSCG00000025026|ENSSSCG00000010548|ENSSSCG00000017700|ENSSSCG00000011251|ENSSSCG00000010380|ENSSSCG00000012981|ENSSSCG00000003395|ENSSSCG00000012853|ENSSSCG00000004110|ENSSSCG00000001952|ENSSSCG00000009003|ENSSSCG00000009002|…	ssc:100627149|ssc:100037937|ssc:100623776|ssc:100037296|ssc:100169744|ssc:494019|ssc:397384|ssc:100156979|ssc:100515633|ssc:100739353|ssc:100135662|ssc:494459|ssc:396646|ssc:396610|ssc:100135665|ssc:100518131|ssc:100037289|ssc:100156182|ssc:406188|ssc:396623|ssc:396623|ssc:396655|	100627149|100037937|100623776|100037296|100169744|494019|397384|100156979|100515633|100739353|100135662|494459|396646|396610|100135665|100518131|100037289|100156182|406188|396623|396623|396655|	RAC1|TLR3, TLR-3| |TLR7|CXCL11|CXCL10|TLR8|TRAF3, TRAF3_TV1|IRF5, IRF5_TV1| |CHUK, IKK-alpha|CCL3L1|MYD88|MAPK8, JNK, JNK1|RELA|PIK3CD|IRF7|TAB2|NFKBIA, ECI-6/IKBA, IKBA|TLR2|TLR2|STAT1|	http://www.genome.jp/kegg-bin/show_pathway?ssc04620/ssc:100518131%09red/ssc:100623776%09red/ssc:396610%09red/ssc:397384%09red/ssc:100037289%09red/ssc:100627149%09red/ssc:100156182%09red/ssc:100156979%09red/ssc:494019%09red/ssc:100037296%09red/ssc:100135662%09red/ssc:100135665%09red/ssc:100515633%09red/ssc:494459%09red/ssc:396646%09red/ssc:396623%09red/ssc:396655%09red/ssc:100169744%09red/ssc:4061…
Hepatitis C	KEGG PATHWAY	ssc05160	25	127	0.00575999	0.19008	ENSSSCG00000000396|ENSSSCG00000015801|ENSSSCG00000012275|ENSSSCG00000024771|ENSSSCG00000009881|ENSSSCG00000024413|ENSSSCG00000030408|ENSSSCG00000030900|ENSSSCG00000028512|ENSSSCG00000002525|ENSSSCG00000017403|ENSSSCG00000010548|ENSSSCG00000025026|ENSSSCG00000009657|ENSSSCG00000008208|ENSSSCG00000013033|ENSSSCG00000025181|ENSSSCG00000010380|ENSSSCG00000012981|ENSSSCG00000003395|ENSSSCG00000010453|…	ssc:396923|ssc:100037937|ssc:397601|ssc:100623776|ssc:595128|ssc:397088|ssc:396723|ssc:396801|ssc:396801|ssc:100156979|ssc:733648|ssc:100135662|ssc:100739353|ssc:397090|ssc:100513348|ssc:100521065|ssc:100523731|ssc:396610|ssc:100135665|ssc:100518131|ssc:100153038|ssc:100037289|ssc:406188|ssc:100520187|ssc:396655|	396923|100037937|397601|100623776|595128|397088|396723|396801|396801|100156979|733648|100135662|100739353|397090|100513348|100521065|100523731|396610|100135665|100518131|100153038|100037289|406188|100520187|396655|	STAT2|TLR3, TLR-3|ARAF, ARAF1| |OAS2|PPP2R1A|DDX58, RHIV-1, RIG-1, RIG-I, RLR-1|LDLR|LDLR|TRAF3, TRAF3_TV1|STAT3|CHUK, IKK-alpha| |PPP2R2A|EIF2AK3|BAD| |MAPK8, JNK, JNK1|RELA|PIK3CD|IFIT1|IRF7|NFKBIA, ECI-6/IKBA, IKBA| |STAT1|	http://www.genome.jp/kegg-bin/show_pathway?ssc05160/ssc:100153038%09red/ssc:100739353%09red/ssc:397090%09red/ssc:100037937%09red/ssc:397088%09red/ssc:595128%09red/ssc:100521065%09red/ssc:733648%09red/ssc:100520187%09red/ssc:396723%09red/ssc:100513348%09red/ssc:396801%09red/ssc:100623776%09red/ssc:100523731%09red/ssc:100156979%09red/ssc:100135665%09red/ssc:396923%09red/ssc:100135662%09red/ssc:4061…
Cytosolic DNA-sensing pathway	KEGG PATHWAY	ssc04623	14	61	0.0118649	0.348036	ENSSSCG00000012981|ENSSSCG00000006543|ENSSSCG00000001952|ENSSSCG00000010548|ENSSSCG00000012853|ENSSSCG00000025026|ENSSSCG00000028711|ENSSSCG00000005203|ENSSSCG00000008977|ENSSSCG00000014349|ENSSSCG00000007508|ENSSSCG00000007970|ENSSSCG00000030408|ENSSSCG00000021383	ssc:100135665|ssc:100523784|ssc:406188|ssc:100135662|ssc:100037289|ssc:100739353|ssc:397319|ssc:100518643|ssc:494019|ssc:100217389|ssc:100144524|ssc:100521261|ssc:396723|ssc:100516408|	100135665|100523784|406188|100135662|100037289|100739353|397319|100518643|494019|100217389|100144524|100521261|396723|100516408|	RELA|ADAR|NFKBIA, ECI-6/IKBA, IKBA|CHUK, IKK-alpha|IRF7| |CASP1|IL33, IL-33|CXCL10|TMEM173, STING|ZBP1, DAI|POLR3K|DDX58, RHIV-1, RIG-1, RIG-I, RLR-1|MB21D1|	http://www.genome.jp/kegg-bin/show_pathway?ssc04623/ssc:100518643%09red/ssc:396723%09red/ssc:100739353%09red/ssc:100037289%09red/ssc:406188%09red/ssc:100144524%09red/ssc:494019%09red/ssc:100516408%09red/ssc:100135665%09red/ssc:397319%09red/ssc:100135662%09red/ssc:100521261%09red/ssc:100217389%09red/ssc:100523784%09red
Adherens junction	KEGG PATHWAY	ssc04520	15	71	0.0171925	0.438336	ENSSSCG00000010638|ENSSSCG00000007334|ENSSSCG00000022080|ENSSSCG00000028968|ENSSSCG00000014339|ENSSSCG00000013174|ENSSSCG00000003577|ENSSSCG00000004421|ENSSSCG00000013564|ENSSSCG00000000068|ENSSSCG00000021349|ENSSSCG00000001414|ENSSSCG00000007585|ENSSSCG00000010313|ENSSSCG00000028355	ssc:100153922|ssc:100154503|ssc:396849|ssc:100627149|ssc:100523778|ssc:100519699|ssc:100512789|ssc:791125|ssc:396755|ssc:100156226|ssc:396974|ssc:397211|ssc:414396|ssc:396974|ssc:397653|	100153922|100154503|396849|100627149|100523778|100519699|100512789|791125|396755|100156226|396974|397211|414396|396974|397653|	TCF7L2|SRC, c-Src|RHOA|RAC1|CTNNA1|CTNND1|WASF2|FYN, PKC|INSR|EP300|VCL|CSNK2B, CK2N, CKII_beta|ACTB|VCL|ACTB|	http://www.genome.jp/kegg-bin/show_pathway?ssc04520/ssc:414396%09red/ssc:791125%09red/ssc:397211%09red/ssc:396974%09red/ssc:100512789%09red/ssc:100153922%09red/ssc:100156226%09red/ssc:100519699%09red/ssc:100154503%09red/ssc:397653%09red/ssc:100627149%09red/ssc:396849%09red/ssc:396755%09red/ssc:100523778%09red
Chemokine signaling pathway	KEGG PATHWAY	ssc04062	29	173	0.0198824	0.438336	ENSSSCG00000030066|ENSSSCG00000000396|ENSSSCG00000022080|ENSSSCG00000028968|ENSSSCG00000008978|ENSSSCG00000008977|ENSSSCG00000026707|ENSSSCG00000006250|ENSSSCG00000011318|ENSSSCG00000007240|ENSSSCG00000017403|ENSSSCG00000010548|ENSSSCG00000020667|ENSSSCG00000016656|ENSSSCG00000017700|ENSSSCG00000011842|ENSSSCG00000013034|ENSSSCG00000011399|ENSSSCG00000009956|ENSSSCG00000012981|ENSSSCG00000003395|…	ssc:397422|ssc:396923|ssc:396849|ssc:100627149|ssc:100169744|ssc:494019|ssc:414375|ssc:100152890|ssc:414376|ssc:100526085|ssc:733648|ssc:100135662|ssc:100520680|ssc:100522109|ssc:494459|ssc:100525766|ssc:100525148|ssc:397523|ssc:100156449|ssc:100135665|ssc:100518131|ssc:100154503|ssc:100620994|ssc:397422|ssc:100302703|ssc:406188|ssc:100520187|ssc:100157507|ssc:396655|	397422|396923|396849|100627149|100169744|494019|414375|100152890|414376|100526085|733648|100135662|100520680|100522109|494459|100525766|100525148|397523|100156449|100135665|100518131|100154503|100620994|397422|100302703|406188|100520187|100157507|396655|	CCL2, MCP-1|STAT2|RHOA|RAC1|CXCL11|CXCL10|XCR1|LYN|CXCR6|HCK|STAT3|CHUK, IKK-alpha| |ELMO1|CCL3L1|PAK1|PLCB3|GNAI2, GBI2|ADRBK2|RELA|PIK3CD|SRC, c-Src| |CCL2, MCP-1|CCL8|NFKBIA, ECI-6/IKBA, IKBA| |PTK2B|STAT1|	http://www.genome.jp/kegg-bin/show_pathway?ssc04062/ssc:100135662%09red/ssc:100152890%09red/ssc:100154503%09red/ssc:406188%09red/ssc:100525148%09red/ssc:100526085%09red/ssc:100520680%09red/ssc:733648%09red/ssc:414375%09red/ssc:414376%09red/ssc:100169744%09red/ssc:100156449%09red/ssc:396849%09red/ssc:100627149%09red/ssc:100620994%09red/ssc:100522109%09red/ssc:494019%09red/ssc:100135665%09red/ssc:3…
Hepatitis B	KEGG PATHWAY	ssc05161	26	151	0.0203054	0.438336	ENSSSCG00000000396|ENSSSCG00000015801|ENSSSCG00000024771|ENSSSCG00000011251|ENSSSCG00000025026|ENSSSCG00000030408|ENSSSCG00000017403|ENSSSCG00000010548|ENSSSCG00000016714|ENSSSCG00000010224|ENSSSCG00000007026|ENSSSCG00000013033|ENSSSCG00000000068|ENSSSCG00000005965|ENSSSCG00000010380|ENSSSCG00000012981|ENSSSCG00000003395|ENSSSCG00000007334|ENSSSCG00000029091|ENSSSCG00000012853|ENSSSCG00000001952|…	ssc:396923|ssc:100037937|ssc:100623776|ssc:396646|ssc:100739353|ssc:396723|ssc:733648|ssc:100135662|ssc:100170131|ssc:100038004|ssc:397651|ssc:100521065|ssc:100156226|ssc:448810|ssc:396610|ssc:100135665|ssc:100518131|ssc:100154503|ssc:100513283|ssc:100037289|ssc:406188|ssc:396623|ssc:396623|ssc:100157507|ssc:396655|ssc:100154896|	396923|100037937|100623776|396646|100739353|396723|733648|100135662|100170131|100038004|397651|100521065|100156226|448810|396610|100135665|100518131|100154503|100513283|100037289|406188|396623|396623|100157507|396655|100154896|	STAT2|TLR3, TLR-3| |MYD88| |DDX58, RHIV-1, RIG-1, RIG-I, RLR-1|STAT3|CHUK, IKK-alpha|CYCS, CYC|EGR2|VDAC1P5, VDAC3, VDAC5P|BAD|EP300|MYC|MAPK8, JNK, JNK1|RELA|PIK3CD|SRC, c-Src|APAF1|IRF7|NFKBIA, ECI-6/IKBA, IKBA|TLR2|TLR2|PTK2B|STAT1|CASP10|	http://www.genome.jp/kegg-bin/show_pathway?ssc05161/ssc:448810%09red/ssc:100157507%09red/ssc:100037937%09red/ssc:100156226%09red/ssc:100154503%09red/ssc:397651%09red/ssc:100521065%09red/ssc:100739353%09red/ssc:100170131%09red/ssc:100154896%09red/ssc:396723%09red/ssc:396646%09red/ssc:396623%09red/ssc:100513283%09red/ssc:100623776%09red/ssc:100135665%09red/ssc:396923%09red/ssc:100135662%09red/ssc:4…
Acute myeloid leukemia	KEGG PATHWAY	ssc05221	12	54	0.0230358	0.438336	ENSSSCG00000010638|ENSSSCG00000012981|ENSSSCG00000003395|ENSSSCG00000008478|ENSSSCG00000012051|ENSSSCG00000013033|ENSSSCG00000017403|ENSSSCG00000010548|ENSSSCG00000012275|ENSSSCG00000003413|ENSSSCG00000005965|ENSSSCG00000001912	ssc:100153922|ssc:100135665|ssc:100518131|ssc:100520187|ssc:100512633|ssc:100521065|ssc:733648|ssc:100135662|ssc:397601|ssc:100127359|ssc:448810|ssc:100157336|	100153922|100135665|100518131|100520187|100512633|100521065|733648|100135662|397601|100127359|448810|100157336|	TCF7L2|RELA|PIK3CD| |RUNX1|BAD|STAT3|CHUK, IKK-alpha|ARAF, ARAF1|MTOR, FRAP1|MYC|PML|	http://www.genome.jp/kegg-bin/show_pathway?ssc05221/ssc:448810%09red/ssc:100518131%09red/ssc:397601%09red/ssc:733648%09red/ssc:100157336%09red/ssc:100135662%09red/ssc:100135665%09red/ssc:100127359%09red/ssc:100512633%09red/ssc:100520187%09red/ssc:100153922%09red/ssc:100521065%09red
Salmonella infection	KEGG PATHWAY	ssc05132	16	81	0.0232451	0.438336	ENSSSCG00000010380|ENSSSCG00000012981|ENSSSCG00000022307|ENSSSCG00000011552|ENSSSCG00000028968|ENSSSCG00000015560|ENSSSCG00000003577|ENSSSCG00000007585|ENSSSCG00000028711|ENSSSCG00000009821|ENSSSCG00000002538|ENSSSCG00000001659|ENSSSCG00000017700|ENSSSCG00000011251|ENSSSCG00000028355|ENSSSCG00000015948	ssc:396610|ssc:100135665|ssc:100627693|ssc:100155875|ssc:100627149|ssc:100174965|ssc:100512789|ssc:414396|ssc:397319|ssc:100154518|ssc:100037291|ssc:100157157|ssc:494459|ssc:396646|ssc:397653|ssc:100154566|	396610|100135665|100627693|100155875|100627149|100174965|100512789|414396|397319|100154518|100037291|100157157|494459|396646|397653|100154566|	MAPK8, JNK, JNK1|RELA| |ARPC4|RAC1|ARPC5|WASF2|ACTB|CASP1|ARPC3|DYNC1H1|KLC4|CCL3L1|MYD88|ACTB|DYNC1I2|	http://www.genome.jp/kegg-bin/show_pathway?ssc05132/ssc:100154566%09red/ssc:100627693%09red/ssc:414396%09red/ssc:100037291%09red/ssc:100155875%09red/ssc:100157157%09red/ssc:100135665%09red/ssc:397319%09red/ssc:397653%09red/ssc:396646%09red/ssc:100627149%09red/ssc:100512789%09red/ssc:494459%09red/ssc:100174965%09red/ssc:396610%09red/ssc:100154518%09red
Thyroid hormone signaling pathway	KEGG PATHWAY	ssc04919	20	113	0.0307099	0.507685	ENSSSCG00000004248|ENSSSCG00000023350|ENSSSCG00000003395|ENSSSCG00000007334|ENSSSCG00000016057|ENSSSCG00000013033|ENSSSCG00000006740|ENSSSCG00000013034|ENSSSCG00000017414|ENSSSCG00000007585|ENSSSCG00000017505|ENSSSCG00000003413|ENSSSCG00000026635|ENSSSCG00000012250|ENSSSCG00000006709|ENSSSCG00000000068|ENSSSCG00000001880|ENSSSCG00000005965|ENSSSCG00000028355|ENSSSCG00000012396	ssc:397421|ssc:100736580|ssc:100518131|ssc:100154503|ssc:396655|ssc:100521065|ssc:397481|ssc:100525148|ssc:100524215|ssc:414396|ssc:100513621|ssc:100127359|ssc:397404|ssc:100515423|ssc:100153369|ssc:100156226|ssc:100621221|ssc:448810|ssc:397653|ssc:100157450|	397421|100736580|100518131|100154503|396655|100521065|397481|100525148|100524215|414396|100513621|100127359|397404|100515423|100153369|100156226|100621221|448810|397653|100157450|	PLN|MED24|PIK3CD|SRC, c-Src|STAT1|BAD|ATP1A1|PLCB3|KAT2A|ACTB|MED1|MTOR, FRAP1|SLC2A1, GLUT1|MED14|NOTCH2|EP300|SIN3A|MYC|ACTB|MED12|	http://www.genome.jp/kegg-bin/show_pathway?ssc04919/ssc:448810%09red/ssc:100518131%09red/ssc:100513621%09red/ssc:414396%09red/ssc:397421%09red/ssc:100524215%09red/ssc:100515423%09red/ssc:100525148%09red/ssc:100156226%09red/ssc:397404%09red/ssc:100154503%09red/ssc:397653%09red/ssc:100736580%09red/ssc:100127359%09red/ssc:100153369%09red/ssc:396655%09red/ssc:100157450%09red/ssc:100621221%09red/ssc:1…
Notch signaling pathway	KEGG PATHWAY	ssc04330	10	44	0.0322387	0.507685	ENSSSCG00000011876|ENSSSCG00000023228|ENSSSCG00000017414|ENSSSCG00000025374|ENSSSCG00000014019|ENSSSCG00000000449|ENSSSCG00000009761|ENSSSCG00000006709|ENSSSCG00000000068|ENSSSCG00000014971	ssc:100520459|ssc:100627312|ssc:100524215|ssc:100621038|ssc:100520231|ssc:100521724|ssc:733643|ssc:100153369|ssc:100156226|ssc:100739729|	100520459|100627312|100524215|100621038|100520231|100521724|733643|100153369|100156226|100739729|	DTX3L|NUMBL|KAT2A|DVL3|MAML1| | |NOTCH2|EP300|MAML2|	http://www.genome.jp/kegg-bin/show_pathway?ssc04330/ssc:100521724%09red/ssc:100156226%09red/ssc:733643%09red/ssc:100520231%09red/ssc:100153369%09red/ssc:100739729%09red/ssc:100621038%09red/ssc:100627312%09red/ssc:100520459%09red/ssc:100524215%09red
RNA degradation	KEGG PATHWAY	ssc03018	14	71	0.0326918	0.507685	ENSSSCG00000017067|ENSSSCG00000005346|ENSSSCG00000013124|ENSSSCG00000008399|ENSSSCG00000025233|ENSSSCG00000016193|ENSSSCG00000006983|ENSSSCG00000028322|ENSSSCG00000006063|ENSSSCG00000022880|ENSSSCG00000030404|ENSSSCG00000021354|ENSSSCG00000002799|ENSSSCG00000014009	ssc:100525087|ssc:100520354|ssc:100514819|ssc:100642182|ssc:100642182|ssc:100153939|ssc:100154442|ssc:100048932|ssc:100153958|ssc:100642182|ssc:100625961|ssc:100622832|ssc:100511993|ssc:100516183|	100525087|100520354|100514819|100642182|100642182|100153939|100154442|100048932|100153958|100642182|100625961|100622832|100511993|100516183|	CNOT8|ZCCHC7|PATL1|PNPT1|PNPT1|RQCD1|CNOT7|BTG2|PABPC1|PNPT1|PAPD5|CNOT4|CNOT1|CNOT6|	http://www.genome.jp/kegg-bin/show_pathway?ssc03018/ssc:100048932%09red/ssc:100625961%09red/ssc:100153958%09red/ssc:100622832%09red/ssc:100154442%09red/ssc:100511993%09red/ssc:100525087%09red/ssc:100642182%09red/ssc:100153939%09red/ssc:100514819%09red/ssc:100520354%09red/ssc:100516183%09red
Phagosome	KEGG PATHWAY	ssc04145	24	147	0.0400871	0.587944	ENSSSCG00000022307|ENSSSCG00000012604|ENSSSCG00000028968|ENSSSCG00000001341|ENSSSCG00000008056|ENSSSCG00000002538|ENSSSCG00000024161|ENSSSCG00000000662|ENSSSCG00000028355|ENSSSCG00000006054|ENSSSCG00000017401|ENSSSCG00000020893|ENSSSCG00000005491|ENSSSCG00000005384|ENSSSCG00000013579|ENSSSCG00000016147|ENSSSCG00000013545|ENSSSCG00000000293|ENSSSCG00000007585|ENSSSCG00000009003|ENSSSCG00000009002|…	ssc:100627693|ssc:100154598|ssc:100627149|ssc:100135031|ssc:100518959|ssc:100037291|ssc:396650|ssc:100154117|ssc:397653|ssc:100154942|ssc:100523018|ssc:733649|ssc:100154379|ssc:100511362|ssc:100170134|ssc:100521692|ssc:100736584|ssc:100155091|ssc:414396|ssc:396623|ssc:396623|ssc:100154566|ssc:613130|ssc:733650|	100627693|100154598|100627149|100135031|100518959|100037291|396650|100154117|397653|100154942|100523018|733649|100154379|100511362|100170134|100521692|100736584|100155091|414396|396623|396623|100154566|613130|733650|	|LAMP2|RAC1|SLA-2, SLA-B|ATP6V0C|DYNC1H1|SLA-7|M6PR|ACTB|ATP6V1C1|ATP6V0A1|TAP1|ATP6V1G1|SEC61B|CD209, DC-SIGN|PIKFYVE| |ITGA5|ACTB|TLR2|TLR2|DYNC1I2|FCGR1A|TAP2|	http://www.genome.jp/kegg-bin/show_pathway?ssc04145/ssc:414396%09red/ssc:397653%09red/ssc:100521692%09red/ssc:100154566%09red/ssc:100170134%09red/ssc:733649%09red/ssc:100037291%09red/ssc:100627149%09red/ssc:100736584%09red/ssc:100155091%09red/ssc:100627693%09red/ssc:100154942%09red/ssc:396623%09red/ssc:100523018%09red/ssc:100511362%09red/ssc:100154379%09red/ssc:100154598%09red/ssc:100154117%09red…
RIG-I-like receptor signaling pathway	KEGG PATHWAY	ssc04622	13	68	0.0462888	0.64317	ENSSSCG00000010380|ENSSSCG00000012981|ENSSSCG00000002525|ENSSSCG00000010548|ENSSSCG00000012853|ENSSSCG00000025026|ENSSSCG00000001952|ENSSSCG00000029475|ENSSSCG00000008977|ENSSSCG00000014349|ENSSSCG00000017416|ENSSSCG00000030408|ENSSSCG00000026940	ssc:396610|ssc:100135665|ssc:100156979|ssc:100135662|ssc:100037289|ssc:100739353|ssc:406188|ssc:100622285|ssc:494019|ssc:100217389|ssc:100524520|ssc:396723|ssc:100154896|	396610|100135665|100156979|100135662|100037289|100739353|406188|100622285|494019|100217389|100524520|396723|100154896|	MAPK8, JNK, JNK1|RELA|TRAF3, TRAF3_TV1|CHUK, IKK-alpha|IRF7| |NFKBIA, ECI-6/IKBA, IKBA| |CXCL10|TMEM173, STING|DHX58, LGP2|DDX58, RHIV-1, RIG-1, RIG-I, RLR-1|CASP10|	http://www.genome.jp/kegg-bin/show_pathway?ssc04622/ssc:100739353%09red/ssc:100037289%09red/ssc:100154896%09red/ssc:100622285%09red/ssc:396723%09red/ssc:494019%09red/ssc:100524520%09red/ssc:396610%09red/ssc:100135665%09red/ssc:100135662%09red/ssc:100217389%09red/ssc:406188%09red/ssc:100156979%09red
Pancreatic cancer	KEGG PATHWAY	ssc05212	12	63	0.0551752	0.724101	ENSSSCG00000010380|ENSSSCG00000012981|ENSSSCG00000003395|ENSSSCG00000020961|ENSSSCG00000028968|ENSSSCG00000013033|ENSSSCG00000017403|ENSSSCG00000010548|ENSSSCG00000012275|ENSSSCG00000003680|ENSSSCG00000005738|ENSSSCG00000016057	ssc:396610|ssc:100135665|ssc:100518131|ssc:100153762|ssc:100627149|ssc:100521065|ssc:733648|ssc:100135662|ssc:397601|ssc:100519155|ssc:100513970|ssc:396655|	396610|100135665|100518131|100153762|100627149|100521065|733648|100135662|397601|100519155|100513970|396655|	MAPK8, JNK, JNK1|RELA|PIK3CD|BRCA2|RAC1|BAD|STAT3|CHUK, IKK-alpha|ARAF, ARAF1|RALBP1|RALGDS|STAT1|	http://www.genome.jp/kegg-bin/show_pathway?ssc05212/ssc:100518131%09red/ssc:397601%09red/ssc:733648%09red/ssc:396610%09red/ssc:100513970%09red/ssc:100153762%09red/ssc:100135665%09red/ssc:100135662%09red/ssc:100627149%09red/ssc:396655%09red/ssc:100521065%09red/ssc:100519155%09red
Legionellosis	KEGG PATHWAY	ssc05134	12	64	0.0600124	0.724101	ENSSSCG00000012981|ENSSSCG00000001952|ENSSSCG00000004169|ENSSSCG00000029091|ENSSSCG00000008359|ENSSSCG00000016714|ENSSSCG00000028711|ENSSSCG00000009003|ENSSSCG00000009002|ENSSSCG00000013064|ENSSSCG00000010260|ENSSSCG00000011251	ssc:100135665|ssc:406188|ssc:100158211|ssc:100513283|ssc:595116|ssc:100170131|ssc:397319|ssc:396623|ssc:396623|ssc:397022|ssc:595115|ssc:396646|	100135665|406188|100158211|100513283|595116|100170131|397319|396623|396623|397022|595115|396646|	RELA|NFKBIA, ECI-6/IKBA, IKBA|HBS1L|APAF1|RAB1A, RAB1B|CYCS, CYC|CASP1|TLR2|TLR2|EEF1G, eEF-1_gamma|SAR1A|MYD88|	http://www.genome.jp/kegg-bin/show_pathway?ssc05134/ssc:100513283%09red/ssc:100158211%09red/ssc:100170131%09red/ssc:595115%09red/ssc:100135665%09red/ssc:595116%09red/ssc:397319%09red/ssc:396646%09red/ssc:396623%09red/ssc:397022%09red/ssc:406188%09red
NOD-like receptor signaling pathway	KEGG PATHWAY	ssc04621	10	50	0.0603418	0.724101	ENSSSCG00000010380|ENSSSCG00000012981|ENSSSCG00000028711|ENSSSCG00000030066|ENSSSCG00000012203|ENSSSCG00000010548|ENSSSCG00000001701|ENSSSCG00000004110|ENSSSCG00000017723|ENSSSCG00000001952	ssc:396610|ssc:100135665|ssc:397319|ssc:397422|ssc:100517796|ssc:100135662|ssc:396742|ssc:100156182|ssc:397422|ssc:406188|	396610|100135665|397319|397422|100517796|100135662|396742|100156182|397422|406188|	MAPK8, JNK, JNK1|RELA|CASP1|CCL2, MCP-1|TAB3|CHUK, IKK-alpha|HSPCB|TAB2|CCL2, MCP-1|NFKBIA, ECI-6/IKBA, IKBA|	http://www.genome.jp/kegg-bin/show_pathway?ssc04621/ssc:100156182%09red/ssc:397422%09red/ssc:100135665%09red/ssc:397319%09red/ssc:100135662%09red/ssc:396742%09red/ssc:100517796%09red/ssc:406188%09red/ssc:396610%09red
Pathways in cancer	KEGG PATHWAY	ssc05200	44	319	0.0688496	0.790274	ENSSSCG00000020961|ENSSSCG00000028968|ENSSSCG00000026279|ENSSSCG00000012275|ENSSSCG00000003680|ENSSSCG00000000769|ENSSSCG00000022486|ENSSSCG00000024671|ENSSSCG00000022080|ENSSSCG00000002525|ENSSSCG00000014339|ENSSSCG00000017403|ENSSSCG00000024222|ENSSSCG00000016714|ENSSSCG00000015115|ENSSSCG00000008443|ENSSSCG00000003413|ENSSSCG00000003140|ENSSSCG00000010548|ENSSSCG00000015618|ENSSSCG00000010638|…	ssc:100153762|ssc:100627149|ssc:100155578|ssc:397601|ssc:100519155|ssc:594852|ssc:100621690|ssc:100512949|ssc:396849|ssc:100156979|ssc:100523778|ssc:733648|ssc:100337665|ssc:100170131|ssc:100518854|ssc:100037272|ssc:100127359|ssc:100302504|ssc:100135662|ssc:100513489|ssc:100153922|ssc:100627504|ssc:100521065|ssc:100517170|ssc:397643|ssc:397404|ssc:100156226|ssc:448810|ssc:100515336|ssc:100153454|…	100153762|100627149|100155578|397601|100519155|594852|100621690|100512949|396849|100156979|100523778|733648|100337665|100170131|100518854|100037272|100127359|100302504|100135662|100513489|100153922|100627504|100521065|100517170|397643|397404|100156226|448810|100515336|100153454|396610|100135665|100518131|100155896|396742|100517932|100512633|100517317|100621038|396655|406188|100520187|100513970|10…	BRCA2|RAC1|DAPK2|ARAF, ARAF1|RALBP1|BID|CBLB|WNT9A|RHOA|TRAF3, TRAF3_TV1|CTNNA1|STAT3|MLH1|CYCS, CYC|CBL|EPAS1, EPAS, EPAS-1|MTOR, FRAP1|FGF21|CHUK, IKK-alpha|LAMB3|TCF7L2|PTCH1|BAD|MAX|FGF2|SLC2A1, GLUT1|EP300|MYC|COL4A1|COL4A2|MAPK8, JNK, JNK1|RELA|PIK3CD|CCDC6|HSPCB|APC, APC1|RUNX1| |DVL3|STAT1|NFKBIA, ECI-6/IKBA, IKBA| |RALGDS|PML|	http://www.genome.jp/kegg-bin/show_pathway?ssc05200/ssc:100156979%09red/ssc:448810%09red/ssc:100155896%09red/ssc:100519155%09red/ssc:100627504%09red/ssc:100513970%09red/ssc:100156226%09red/ssc:100512949%09red/ssc:100127359%09red/ssc:100517170%09red/ssc:100153454%09red/ssc:406188%09red/ssc:100302504%09red/ssc:100521065%09red/ssc:100517317%09red/ssc:100037272%09red/ssc:100170131%09red/ssc:100520187…
Fc gamma R-mediated phagocytosis	KEGG PATHWAY	ssc04666	14	81	0.0721813	0.793995	ENSSSCG00000007240|ENSSSCG00000003395|ENSSSCG00000023503|ENSSSCG00000011552|ENSSSCG00000028968|ENSSSCG00000023610|ENSSSCG00000011842|ENSSSCG00000015560|ENSSSCG00000003577|ENSSSCG00000028759|ENSSSCG00000028887|ENSSSCG00000009821|ENSSSCG00000006678|ENSSSCG00000006250	ssc:100526085|ssc:100518131|ssc:100622955|ssc:100155875|ssc:100627149|ssc:100517207|ssc:100525766|ssc:100174965|ssc:100512789|ssc:100153066|ssc:414900|ssc:100154518|ssc:613130|ssc:100152890|	100526085|100518131|100622955|100155875|100627149|100517207|100525766|100174965|100512789|100153066|414900|100154518|613130|100152890|	HCK|PIK3CD|PRKCD|ARPC4|RAC1|MARCKS|PAK1|ARPC5|WASF2|ASAP1|PLD2|ARPC3|FCGR1A|LYN|	http://www.genome.jp/kegg-bin/show_pathway?ssc04666/ssc:100518131%09red/ssc:100526085%09red/ssc:100525766%09red/ssc:100517207%09red/ssc:100152890%09red/ssc:100512789%09red/ssc:100155875%09red/ssc:414900%09red/ssc:100153066%09red/ssc:613130%09red/ssc:100174965%09red/ssc:100627149%09red/ssc:100622955%09red/ssc:100154518%09red
Colorectal cancer	KEGG PATHWAY	ssc05210	12	68	0.0821273	0.862358	ENSSSCG00000010638|ENSSSCG00000010380|ENSSSCG00000003395|ENSSSCG00000005965|ENSSSCG00000022080|ENSSSCG00000028968|ENSSSCG00000013033|ENSSSCG00000014207|ENSSSCG00000012275|ENSSSCG00000016714|ENSSSCG00000005738|ENSSSCG00000024222	ssc:100153922|ssc:396610|ssc:100518131|ssc:448810|ssc:396849|ssc:100627149|ssc:100521065|ssc:100517932|ssc:397601|ssc:100170131|ssc:100513970|ssc:100337665|	100153922|396610|100518131|448810|396849|100627149|100521065|100517932|397601|100170131|100513970|100337665|	TCF7L2|MAPK8, JNK, JNK1|PIK3CD|MYC|RHOA|RAC1|BAD|APC, APC1|ARAF, ARAF1|CYCS, CYC|RALGDS|MLH1|	http://www.genome.jp/kegg-bin/show_pathway?ssc05210/ssc:448810%09red/ssc:100518131%09red/ssc:397601%09red/ssc:100170131%09red/ssc:396610%09red/ssc:100513970%09red/ssc:396849%09red/ssc:100517932%09red/ssc:100627149%09red/ssc:100153922%09red/ssc:100521065%09red/ssc:100337665%09red
Lysosome	KEGG PATHWAY	ssc04142	18	115	0.0896658	0.862358	ENSSSCG00000017087|ENSSSCG00000027146|ENSSSCG00000010798|ENSSSCG00000014058|ENSSSCG00000025932|ENSSSCG00000012604|ENSSSCG00000017666|ENSSSCG00000023080|ENSSSCG00000012731|ENSSSCG00000017401|ENSSSCG00000008056|ENSSSCG00000006522|ENSSSCG00000002452|ENSSSCG00000009978|ENSSSCG00000017211|ENSSSCG00000003707|ENSSSCG00000000662|ENSSSCG00000022659	ssc:100515283|ssc:100415928|ssc:100524333|ssc:100525860|ssc:100627432|ssc:100154598|ssc:100271929|ssc:100623352|ssc:100512880|ssc:100523018|ssc:100518959|ssc:449572|ssc:100154477|ssc:100157709|ssc:100525777|ssc:397591|ssc:100154117|ssc:100271929|	100515283|100415928|100524333|100525860|100627432|100154598|100271929|100623352|100512880|100523018|100518959|449572|100154477|100157709|100525777|397591|100154117|100271929|	GM2A| |GGA2|CLTB| |LAMP2|CLTC|TPP1|IDS|ATP6V0A1|ATP6V0C|GBA|LGMN|AP1B1|GGA3|NPC1|M6PR|CLTC|	http://www.genome.jp/kegg-bin/show_pathway?ssc04142/ssc:100627432%09red/ssc:100271929%09red/ssc:100525860%09red/ssc:100515283%09red/ssc:100525777%09red/ssc:100415928%09red/ssc:100154598%09red/ssc:100512880%09red/ssc:100523018%09red/ssc:397591%09red/ssc:449572%09red/ssc:100524333%09red/ssc:100623352%09red/ssc:100518959%09red/ssc:100154477%09red/ssc:100154117%09red/ssc:100157709%09red
Toxoplasmosis	KEGG PATHWAY	ssc05145	18	115	0.0896658	0.862358	ENSSSCG00000030900|ENSSSCG00000012981|ENSSSCG00000003395|ENSSSCG00000028512|ENSSSCG00000013033|ENSSSCG00000017403|ENSSSCG00000010548|ENSSSCG00000027855|ENSSSCG00000016714|ENSSSCG00000016057|ENSSSCG00000004110|ENSSSCG00000001952|ENSSSCG00000009003|ENSSSCG00000009002|ENSSSCG00000011251|ENSSSCG00000011399|ENSSSCG00000010380|ENSSSCG00000015618	ssc:396801|ssc:100135665|ssc:100518131|ssc:396801|ssc:100521065|ssc:733648|ssc:100135662|ssc:100307052|ssc:100170131|ssc:396655|ssc:100156182|ssc:406188|ssc:396623|ssc:396623|ssc:396646|ssc:397523|ssc:396610|ssc:100513489|	396801|100135665|100518131|396801|100521065|733648|100135662|100307052|100170131|396655|100156182|406188|396623|396623|396646|397523|396610|100513489|	LDLR|RELA|PIK3CD|LDLR|BAD|STAT3|CHUK, IKK-alpha|SOCS1|CYCS, CYC|STAT1|TAB2|NFKBIA, ECI-6/IKBA, IKBA|TLR2|TLR2|MYD88|GNAI2, GBI2|MAPK8, JNK, JNK1|LAMB3|	http://www.genome.jp/kegg-bin/show_pathway?ssc05145/ssc:396801%09red/ssc:100518131%09red/ssc:396610%09red/ssc:396623%09red/ssc:100170131%09red/ssc:100156182%09red/ssc:100135662%09red/ssc:100307052%09red/ssc:733648%09red/ssc:100135665%09red/ssc:396646%09red/ssc:397523%09red/ssc:396655%09red/ssc:406188%09red/ssc:100513489%09red/ssc:100521065%09red
ErbB signaling pathway	KEGG PATHWAY	ssc04012	14	85	0.0942542	0.862358	ENSSSCG00000010380|ENSSSCG00000011843|ENSSSCG00000003395|ENSSSCG00000008478|ENSSSCG00000009123|ENSSSCG00000013033|ENSSSCG00000011842|ENSSSCG00000012275|ENSSSCG00000015115|ENSSSCG00000003413|ENSSSCG00000022486|ENSSSCG00000007334|ENSSSCG00000005965|ENSSSCG00000008962	ssc:396610|ssc:100511837|ssc:100518131|ssc:100520187|ssc:397674|ssc:100521065|ssc:100525766|ssc:397601|ssc:100518854|ssc:100127359|ssc:100621690|ssc:100154503|ssc:448810|ssc:100620969|	396610|100511837|100518131|100520187|397674|100521065|100525766|397601|100518854|100127359|100621690|100154503|448810|100620969|	MAPK8, JNK, JNK1|PAK2|PIK3CD| |CAMK2D|BAD|PAK1|ARAF, ARAF1|CBL|MTOR, FRAP1|CBLB|SRC, c-Src|MYC|EREG|	http://www.genome.jp/kegg-bin/show_pathway?ssc04012/ssc:448810%09red/ssc:100511837%09red/ssc:100525766%09red/ssc:397601%09red/ssc:396610%09red/ssc:100621690%09red/ssc:100518854%09red/ssc:100154503%09red/ssc:100518131%09red/ssc:100127359%09red/ssc:397674%09red/ssc:100520187%09red/ssc:100620969%09red/ssc:100521065%09red
Endocytosis	KEGG PATHWAY	ssc04144	29	206	0.101761	0.862358	ENSSSCG00000028762|ENSSSCG00000022080|ENSSSCG00000028887|ENSSSCG00000013364|ENSSSCG00000022486|ENSSSCG00000024161|ENSSSCG00000012397|ENSSSCG00000005629|ENSSSCG00000028512|ENSSSCG00000020666|ENSSSCG00000017666|ENSSSCG00000015115|ENSSSCG00000014023|ENSSSCG00000022659|ENSSSCG00000012324|ENSSSCG00000030900|ENSSSCG00000012160|ENSSSCG00000008222|ENSSSCG00000028759|ENSSSCG00000027034|ENSSSCG00000016593|…	ssc:100511491|ssc:396849|ssc:414900|ssc:100524238|ssc:100621690|ssc:396650|ssc:397156|ssc:100523714|ssc:396801|ssc:100738234|ssc:100271929|ssc:100518854|ssc:100519354|ssc:100271929|ssc:100520058|ssc:396801|ssc:100522530|ssc:100522249|ssc:100153066|ssc:100516416|ssc:100270722|ssc:100135031|ssc:100156449|ssc:100154193|ssc:100525860|ssc:100154503|ssc:100125967|ssc:100622196|ssc:100157336|	100511491|396849|414900|100524238|100621690|396650|397156|100523714|396801|100738234|100271929|100518854|100519354|100271929|100520058|396801|100522530|100522249|100153066|100516416|100270722|100135031|100156449|100154193|100525860|100154503|100125967|100622196|100157336|	VPS37C|RHOA|PLD2| |CBLB|SLA-7|IL2RG|PIP5KL1|LDLR|EHD4|CLTC|CBL|RUFY1|CLTC|IQSEC2|LDLR|SH3KBP1|CHMP3|ASAP1|EHD1|ARF5|SLA-2, SLA-B|ADRBK2|GBF1|CLTB|SRC, c-Src|LDLRAP1|IQSEC1|PML|	http://www.genome.jp/kegg-bin/show_pathway?ssc04144/ssc:100516416%09red/ssc:100738234%09red/ssc:100520058%09red/ssc:414900%09red/ssc:100154503%09red/ssc:100522249%09red/ssc:100522530%09red/ssc:100519354%09red/ssc:100511491%09red/ssc:100156449%09red/ssc:396849%09red/ssc:100524238%09red/ssc:396801%09red/ssc:100523714%09red/ssc:100525860%09red/ssc:100157336%09red/ssc:100153066%09red/ssc:100270722%09…
Sulfur relay system	KEGG PATHWAY	ssc04122	3	9	0.102239	0.862358	ENSSSCG00000007307|ENSSSCG00000007475|ENSSSCG00000001596	ssc:100156145|ssc:100124378|ssc:100154835|	100156145|100124378|100154835|	|MOCS3, UBA4|MOCS1|	http://www.genome.jp/kegg-bin/show_pathway?ssc04122/ssc:100154835%09red/ssc:100156145%09red/ssc:100124378%09red
Endometrial cancer	KEGG PATHWAY	ssc05213	9	49	0.1033	0.862358	ENSSSCG00000010638|ENSSSCG00000003395|ENSSSCG00000014339|ENSSSCG00000014207|ENSSSCG00000012275|ENSSSCG00000013033|ENSSSCG00000008478|ENSSSCG00000005965|ENSSSCG00000024222	ssc:100153922|ssc:100518131|ssc:100523778|ssc:100517932|ssc:397601|ssc:100521065|ssc:100520187|ssc:448810|ssc:100337665|	100153922|100518131|100523778|100517932|397601|100521065|100520187|448810|100337665|	TCF7L2|PIK3CD|CTNNA1|APC, APC1|ARAF, ARAF1|BAD| |MYC|MLH1|	http://www.genome.jp/kegg-bin/show_pathway?ssc05213/ssc:448810%09red/ssc:100518131%09red/ssc:397601%09red/ssc:100523778%09red/ssc:100517932%09red/ssc:100520187%09red/ssc:100153922%09red/ssc:100521065%09red/ssc:100337665%09red
Tuberculosis	KEGG PATHWAY	ssc05152	25	174	0.104528	0.862358	ENSSSCG00000012604|ENSSSCG00000009123|ENSSSCG00000022080|ENSSSCG00000017753|ENSSSCG00000011251|ENSSSCG00000000769|ENSSSCG00000008056|ENSSSCG00000017401|ENSSSCG00000016714|ENSSSCG00000025026|ENSSSCG00000006625|ENSSSCG00000013033|ENSSSCG00000003976|ENSSSCG00000013579|ENSSSCG00000000068|ENSSSCG00000010380|ENSSSCG00000012981|ENSSSCG00000007334|ENSSSCG00000029091|ENSSSCG00000009003|ENSSSCG00000009002|…	ssc:100154598|ssc:397674|ssc:396849|ssc:100511282|ssc:396646|ssc:594852|ssc:100518959|ssc:100523018|ssc:100170131|ssc:100739353|ssc:100517711|ssc:100521065|ssc:100525647|ssc:100170134|ssc:100156226|ssc:396610|ssc:100135665|ssc:100154503|ssc:100513283|ssc:396623|ssc:396623|ssc:396603|ssc:613130|ssc:396655|ssc:100154896|	100154598|397674|396849|100511282|396646|594852|100518959|100523018|100170131|100739353|100517711|100521065|100525647|100170134|100156226|396610|100135665|100154503|100513283|396623|396623|396603|613130|396655|100154896|	LAMP2|CAMK2D|RHOA|KSR1|MYD88|BID|ATP6V0C|ATP6V0A1|CYCS, CYC| |RFX5|BAD|NFYC|CD209, DC-SIGN|EP300|MAPK8, JNK, JNK1|RELA|SRC, c-Src|APAF1|TLR2|TLR2|PPP3CB|FCGR1A|STAT1|CASP10|	http://www.genome.jp/kegg-bin/show_pathway?ssc05152/ssc:100739353%09red/ssc:100156226%09red/ssc:100154503%09red/ssc:397674%09red/ssc:100521065%09red/ssc:100170134%09red/ssc:100170131%09red/ssc:100154896%09red/ssc:396603%09red/ssc:396849%09red/ssc:396646%09red/ssc:396623%09red/ssc:100513283%09red/ssc:100523018%09red/ssc:100135665%09red/ssc:100517711%09red/ssc:100525647%09red/ssc:100511282%09red/ss…
Jak-STAT signaling pathway	KEGG PATHWAY	ssc04630	22	153	0.120885	0.922405	ENSSSCG00000000396|ENSSSCG00000022486|ENSSSCG00000025026|ENSSSCG00000012397|ENSSSCG00000016832|ENSSSCG00000030906|ENSSSCG00000017403|ENSSSCG00000015653|ENSSSCG00000027855|ENSSSCG00000014278|ENSSSCG00000015654|ENSSSCG00000015115|ENSSSCG00000006161|ENSSSCG00000016851|ENSSSCG00000006689|ENSSSCG00000000068|ENSSSCG00000005965|ENSSSCG00000003395|ENSSSCG00000027628|ENSSSCG00000008478|ENSSSCG00000008357|…	ssc:396923|ssc:100621690|ssc:100739353|ssc:397156|ssc:100271930|ssc:100626347|ssc:733648|ssc:100038024|ssc:100307052|ssc:397409|ssc:100522695|ssc:100518854|ssc:397253|ssc:100519398|ssc:100511878|ssc:100156226|ssc:448810|ssc:100518131|ssc:399522|ssc:100520187|ssc:100518067|ssc:396655|	396923|100621690|100739353|397156|100271930|100626347|733648|100038024|100307052|397409|100522695|100518854|397253|100519398|100511878|100156226|448810|100518131|399522|100520187|100518067|396655|	STAT2|CBLB| |IL2RG|IL7R, CD127|MPL|STAT3|IL19|SOCS1|IL-5, IL5|IL20|CBL|IL7, IL-7|OSMR|PIAS3|EP300|MYC|PIK3CD|IL6R, IL-6Ralpha| |SPRED2|STAT1|	http://www.genome.jp/kegg-bin/show_pathway?ssc04630/ssc:448810%09red/ssc:100519398%09red/ssc:100739353%09red/ssc:100626347%09red/ssc:100156226%09red/ssc:733648%09red/ssc:100522695%09red/ssc:100271930%09red/ssc:100518067%09red/ssc:399522%09red/ssc:100307052%09red/ssc:396923%09red/ssc:100520187%09red/ssc:100518131%09red/ssc:397156%09red/ssc:397253%09red/ssc:100621690%09red/ssc:100038024%09red/ssc:1…
Spliceosome	KEGG PATHWAY	ssc03040	19	129	0.12231	0.922405	ENSSSCG00000000288|ENSSSCG00000017155|ENSSSCG00000017817|ENSSSCG00000000058|ENSSSCG00000002998|ENSSSCG00000015988|ENSSSCG00000010877|ENSSSCG00000006756|ENSSSCG00000027323|ENSSSCG00000021615|ENSSSCG00000017626|ENSSSCG00000010002|ENSSSCG00000014416|ENSSSCG00000000635|ENSSSCG00000013602|ENSSSCG00000029341|ENSSSCG00000029308|ENSSSCG00000008127|ENSSSCG00000027224	ssc:768103|ssc:100101926|ssc:100526074|ssc:100155420|ssc:768109|ssc:100516520|ssc:100515571|ssc:100154006|ssc:100156513|ssc:100625186|ssc:654327|ssc:100154850|ssc:100621703|ssc:100518306|ssc:100514153|ssc:100622596|ssc:100154850|ssc:100739577|ssc:100511501|	768103|100101926|100526074|100155420|768109|100516520|100515571|100154006|100156513|100625186|654327|100154850|100621703|100518306|100514153|100622596|100154850|100739577|100511501|	HNRNPA1, HNRPA1, ROA1|EIF4A3, DDX48, eIF4A-III|PRPF8|NHP2L1|SNRPA, U1A|HNRNPA3|HNRNPU|BCAS2|NCBP2|SRSF10|SRSF1, SFRS1|SF3A1|TCERG1|MAGOHB|HNRNPM|ISY1|SF3A1|SNRNP200|PCBP1|	http://www.genome.jp/kegg-bin/show_pathway?ssc03040/ssc:100622596%09red/ssc:100154006%09red/ssc:100514153%09red/ssc:100156513%09red/ssc:100621703%09red/ssc:100154850%09red/ssc:100518306%09red/ssc:100526074%09red/ssc:654327%09red/ssc:768103%09red/ssc:100516520%09red/ssc:100511501%09red/ssc:100739577%09red/ssc:100155420%09red/ssc:768109%09red/ssc:100515571%09red/ssc:100101926%09red/ssc:100625186%09…
Synaptic vesicle cycle	KEGG PATHWAY	ssc04721	10	59	0.125864	0.922405	ENSSSCG00000017401|ENSSSCG00000014058|ENSSSCG00000005617|ENSSSCG00000003120|ENSSSCG00000005305|ENSSSCG00000017666|ENSSSCG00000008056|ENSSSCG00000022659|ENSSSCG00000005491|ENSSSCG00000006054	ssc:100523018|ssc:100525860|ssc:100517927|ssc:100515953|ssc:100621404|ssc:100271929|ssc:100518959|ssc:100271929|ssc:100154379|ssc:100154942|	100523018|100525860|100517927|100515953|100621404|100271929|100518959|100271929|100154379|100154942|	ATP6V0A1|CLTB|STXBP1|NAPA|UNC13B|CLTC|ATP6V0C|CLTC|ATP6V1G1|ATP6V1C1|	http://www.genome.jp/kegg-bin/show_pathway?ssc04721/ssc:100154942%09red/ssc:100271929%09red/ssc:100517927%09red/ssc:100525860%09red/ssc:100523018%09red/ssc:100621404%09red/ssc:100515953%09red/ssc:100518959%09red/ssc:100154379%09red
Apoptosis	KEGG PATHWAY	ssc04210	14	91	0.134407	0.922405	ENSSSCG00000012981|ENSSSCG00000003395|ENSSSCG00000013033|ENSSSCG00000029091|ENSSSCG00000010548|ENSSSCG00000010301|ENSSSCG00000016714|ENSSSCG00000001952|ENSSSCG00000000769|ENSSSCG00000020906|ENSSSCG00000011251|ENSSSCG00000009637|ENSSSCG00000011363|ENSSSCG00000026940	ssc:100135665|ssc:100518131|ssc:100521065|ssc:100513283|ssc:100135662|ssc:396603|ssc:100170131|ssc:406188|ssc:594852|ssc:406191|ssc:396646|ssc:100624226|ssc:397493|ssc:100154896|	100135665|100518131|100521065|100513283|100135662|396603|100170131|406188|594852|406191|396646|100624226|397493|100154896|	RELA|PIK3CD|BAD|APAF1|CHUK, IKK-alpha|PPP3CB|CYCS, CYC|NFKBIA, ECI-6/IKBA, IKBA|BID|TNFSF10, TRAIL|MYD88| |PRKAR2A|CASP10|	http://www.genome.jp/kegg-bin/show_pathway?ssc04210/ssc:100518131%09red/ssc:100513283%09red/ssc:100170131%09red/ssc:100154896%09red/ssc:406188%09red/ssc:406191%09red/ssc:396603%09red/ssc:100135665%09red/ssc:396646%09red/ssc:100135662%09red/ssc:594852%09red/ssc:397493%09red/ssc:100521065%09red/ssc:100624226%09red
T cell receptor signaling pathway	KEGG PATHWAY	ssc04660	16	107	0.135204	0.922405	ENSSSCG00000012981|ENSSSCG00000003395|ENSSSCG00000022080|ENSSSCG00000017006|ENSSSCG00000010548|ENSSSCG00000011843|ENSSSCG00000014278|ENSSSCG00000004421|ENSSSCG00000015115|ENSSSCG00000001952|ENSSSCG00000008478|ENSSSCG00000008820|ENSSSCG00000010301|ENSSSCG00000022486|ENSSSCG00000004791|ENSSSCG00000011842	ssc:100135665|ssc:100518131|ssc:396849|ssc:100511843|ssc:100135662|ssc:100511837|ssc:397409|ssc:791125|ssc:100518854|ssc:406188|ssc:100520187|ssc:404277|ssc:396603|ssc:100621690|ssc:100522721|ssc:100525766|	100135665|100518131|396849|100511843|100135662|100511837|397409|791125|100518854|406188|100520187|404277|396603|100621690|100522721|100525766|	RELA|PIK3CD|RHOA|LCP2|CHUK, IKK-alpha|PAK2|IL-5, IL5|FYN, PKC|CBL|NFKBIA, ECI-6/IKBA, IKBA| |TEC|PPP3CB|CBLB|RASGRP1|PAK1|	http://www.genome.jp/kegg-bin/show_pathway?ssc04660/ssc:100522721%09red/ssc:100511837%09red/ssc:791125%09red/ssc:404277%09red/ssc:406188%09red/ssc:100621690%09red/ssc:396603%09red/ssc:100525766%09red/ssc:100135665%09red/ssc:100518854%09red/ssc:396849%09red/ssc:100511843%09red/ssc:100135662%09red/ssc:100520187%09red/ssc:100518131%09red/ssc:397409%09red
Antigen processing and presentation	KEGG PATHWAY	ssc04612	11	68	0.137861	0.922405	ENSSSCG00000004700|ENSSSCG00000001701|ENSSSCG00000002452|ENSSSCG00000001341|ENSSSCG00000003976|ENSSSCG00000002006|ENSSSCG00000001507|ENSSSCG00000020893|ENSSSCG00000024161|ENSSSCG00000025173|ENSSSCG00000006625	ssc:100156204|ssc:396742|ssc:100154477|ssc:100135031|ssc:100525647|ssc:397572|ssc:100155428|ssc:733649|ssc:396650|ssc:733650|ssc:100517711|	100156204|396742|100154477|100135031|100525647|397572|100155428|733649|396650|733650|100517711|	PDIA3, grp-58|HSPCB|LGMN|SLA-2, SLA-B|NFYC|PSME1|TAPBP|TAP1|SLA-7|TAP2|RFX5|	http://www.genome.jp/kegg-bin/show_pathway?ssc04612/ssc:733649%09red/ssc:100135031%09red/ssc:733650%09red/ssc:397572%09red/ssc:100155428%09red/ssc:100525647%09red/ssc:100517711%09red/ssc:396742%09red/ssc:100154477%09red/ssc:396650%09red/ssc:100156204%09red
Regulation of actin cytoskeleton	KEGG PATHWAY	ssc04810	27	198	0.140558	0.922405	ENSSSCG00000013261|ENSSSCG00000022080|ENSSSCG00000028968|ENSSSCG00000012275|ENSSSCG00000016147|ENSSSCG00000024960|ENSSSCG00000028355|ENSSSCG00000011552|ENSSSCG00000017054|ENSSSCG00000015560|ENSSSCG00000003577|ENSSSCG00000003107|ENSSSCG00000003140|ENSSSCG00000021349|ENSSSCG00000010313|ENSSSCG00000011842|ENSSSCG00000011843|ENSSSCG00000009086|ENSSSCG00000012474|ENSSSCG00000003395|ENSSSCG00000007334|…	ssc:100516483|ssc:396849|ssc:100627149|ssc:397601|ssc:100521692|ssc:100515267|ssc:397653|ssc:100155875|ssc:100523290|ssc:100174965|ssc:100512789|ssc:100514580|ssc:100302504|ssc:396974|ssc:396974|ssc:100525766|ssc:100511837|ssc:397643|ssc:100155257|ssc:100518131|ssc:100154503|ssc:100517932|ssc:100155091|ssc:414396|ssc:100154518|ssc:100520187|ssc:100511072|	100516483|396849|100627149|397601|100521692|100515267|397653|100155875|100523290|100174965|100512789|100514580|100302504|396974|396974|100525766|100511837|397643|100155257|100518131|100154503|100517932|100155091|414396|100154518|100520187|100511072|	CHRM4|RHOA|RAC1|ARAF, ARAF1|PIKFYVE|PDGFC|ACTB|ARPC4|CYFIP2|ARPC5|WASF2| |FGF21|VCL|VCL|PAK1|PAK2|FGF2|DIAPH2|PIK3CD|SRC, c-Src|APC, APC1|ITGA5|ACTB|ARPC3| |DIAPH1|	http://www.genome.jp/kegg-bin/show_pathway?ssc04810/ssc:414396%09red/ssc:100155875%09red/ssc:100515267%09red/ssc:100154503%09red/ssc:397653%09red/ssc:100521692%09red/ssc:396974%09red/ssc:100155257%09red/ssc:100520187%09red/ssc:100302504%09red/ssc:396849%09red/ssc:100627149%09red/ssc:100155091%09red/ssc:100517932%09red/ssc:100518131%09red/ssc:397643%09red/ssc:100523290%09red/ssc:100511072%09red/ss…
Chagas disease (American trypanosomiasis)	KEGG PATHWAY	ssc05142	16	108	0.142122	0.922405	ENSSSCG00000010380|ENSSSCG00000030066|ENSSSCG00000003395|ENSSSCG00000012981|ENSSSCG00000017723|ENSSSCG00000010548|ENSSSCG00000009002|ENSSSCG00000024771|ENSSSCG00000001952|ENSSSCG00000009003|ENSSSCG00000009657|ENSSSCG00000024413|ENSSSCG00000017700|ENSSSCG00000011251|ENSSSCG00000011399|ENSSSCG00000013034	ssc:396610|ssc:397422|ssc:100518131|ssc:100135665|ssc:397422|ssc:100135662|ssc:396623|ssc:100623776|ssc:406188|ssc:396623|ssc:397090|ssc:397088|ssc:494459|ssc:396646|ssc:397523|ssc:100525148|	396610|397422|100518131|100135665|397422|100135662|396623|100623776|406188|396623|397090|397088|494459|396646|397523|100525148|	MAPK8, JNK, JNK1|CCL2, MCP-1|PIK3CD|RELA|CCL2, MCP-1|CHUK, IKK-alpha|TLR2| |NFKBIA, ECI-6/IKBA, IKBA|TLR2|PPP2R2A|PPP2R1A|CCL3L1|MYD88|GNAI2, GBI2|PLCB3|	http://www.genome.jp/kegg-bin/show_pathway?ssc05142/ssc:100518131%09red/ssc:100525148%09red/ssc:100623776%09red/ssc:396623%09red/ssc:396610%09red/ssc:397090%09red/ssc:397422%09red/ssc:100135662%09red/ssc:397088%09red/ssc:100135665%09red/ssc:494459%09red/ssc:396646%09red/ssc:397523%09red/ssc:406188%09red
RNA transport	KEGG PATHWAY	ssc03013	21	149	0.144375	0.922405	ENSSSCG00000017155|ENSSSCG00000008180|ENSSSCG00000017054|ENSSSCG00000006063|ENSSSCG00000017514|ENSSSCG00000017953|ENSSSCG00000027323|ENSSSCG00000023140|ENSSSCG00000030255|ENSSSCG00000011491|ENSSSCG00000012727|ENSSSCG00000005711|ENSSSCG00000005667|ENSSSCG00000007705|ENSSSCG00000000635|ENSSSCG00000010679|ENSSSCG00000017430|ENSSSCG00000017477|ENSSSCG00000026034|ENSSSCG00000008136|ENSSSCG00000021130	ssc:100101926|ssc:100520783|ssc:100523290|ssc:100153958|ssc:100518449|ssc:100512131|ssc:100156513|ssc:100736566|ssc:449528|ssc:100519334|ssc:100155078|ssc:100155564|ssc:100153500|ssc:100512219|ssc:100518306|ssc:100156570|ssc:100736981|ssc:100525426|ssc:100153581|ssc:100511376|ssc:100152493|	100101926|100520783|100523290|100153958|100518449|100512131|100156513|100736566|449528|100519334|100155078|100155564|100153500|100512219|100518306|100156570|100736981|100525426|100153581|100511376|100152493|	EIF4A3, DDX48, eIF4A-III|EIF5B|CYFIP2|PABPC1|KPNB1|FXR2|NCBP2|EIF2B4|EIF4G1, EIF4GI|THOC7|FMR1|NUP214|NUP188|POM121C|MAGOHB|EIF3A| | |NUP153|RANBP2|RPP21|	http://www.genome.jp/kegg-bin/show_pathway?ssc03013/ssc:449528%09red/ssc:100736566%09red/ssc:100155564%09red/ssc:100153958%09red/ssc:100511376%09red/ssc:100518306%09red/ssc:100153500%09red/ssc:100520783%09red/ssc:100512219%09red/ssc:100518449%09red/ssc:100525426%09red/ssc:100736981%09red/ssc:100153581%09red/ssc:100156513%09red/ssc:100523290%09red/ssc:100156570%09red/ssc:100155078%09red/ssc:100519…
Chronic myeloid leukemia	KEGG PATHWAY	ssc05220	11	69	0.146746	0.922405	ENSSSCG00000012981|ENSSSCG00000003395|ENSSSCG00000012051|ENSSSCG00000013033|ENSSSCG00000010548|ENSSSCG00000012275|ENSSSCG00000015115|ENSSSCG00000001952|ENSSSCG00000008478|ENSSSCG00000022486|ENSSSCG00000005965	ssc:100135665|ssc:100518131|ssc:100512633|ssc:100521065|ssc:100135662|ssc:397601|ssc:100518854|ssc:406188|ssc:100520187|ssc:100621690|ssc:448810|	100135665|100518131|100512633|100521065|100135662|397601|100518854|406188|100520187|100621690|448810|	RELA|PIK3CD|RUNX1|BAD|CHUK, IKK-alpha|ARAF, ARAF1|CBL|NFKBIA, ECI-6/IKBA, IKBA| |CBLB|MYC|	http://www.genome.jp/kegg-bin/show_pathway?ssc05220/ssc:448810%09red/ssc:100518131%09red/ssc:397601%09red/ssc:100621690%09red/ssc:100135665%09red/ssc:100518854%09red/ssc:100135662%09red/ssc:100512633%09red/ssc:100520187%09red/ssc:100521065%09red/ssc:406188%09red
Proteoglycans in cancer	KEGG PATHWAY	ssc05205	26	192	0.153019	0.939464	ENSSSCG00000003413|ENSSSCG00000009123|ENSSSCG00000022080|ENSSSCG00000028968|ENSSSCG00000012275|ENSSSCG00000016809|ENSSSCG00000024671|ENSSSCG00000000555|ENSSSCG00000028355|ENSSSCG00000017403|ENSSSCG00000015115|ENSSSCG00000009002|ENSSSCG00000027312|ENSSSCG00000011842|ENSSSCG00000005169|ENSSSCG00000009086|ENSSSCG00000005965|ENSSSCG00000011884|ENSSSCG00000022173|ENSSSCG00000003395|ENSSSCG00000007334|…	ssc:100127359|ssc:397674|ssc:396849|ssc:100627149|ssc:397601|ssc:100524961|ssc:100512949|ssc:100155015|ssc:397653|ssc:733648|ssc:100518854|ssc:396623|ssc:100627504|ssc:100525766|ssc:100038023|ssc:397643|ssc:448810|ssc:100521992|ssc:100157679|ssc:100518131|ssc:100154503|ssc:100155091|ssc:414396|ssc:396623|ssc:100520187|ssc:100621690|	100127359|397674|396849|100627149|397601|100524961|100512949|100155015|397653|733648|100518854|396623|100627504|100525766|100038023|397643|448810|100521992|100157679|100518131|100154503|100155091|414396|396623|100520187|100621690|	MTOR, FRAP1|CAMK2D|RHOA|RAC1|ARAF, ARAF1|DROSHA|WNT9A|ITPR3|ACTB|STAT3|CBL|TLR2|PTCH1|PAK1|RPS6|FGF2|MYC|HCLS1|ANK1|PIK3CD|SRC, c-Src|ITGA5|ACTB|TLR2| |CBLB|	http://www.genome.jp/kegg-bin/show_pathway?ssc05205/ssc:448810%09red/ssc:100512949%09red/ssc:414396%09red/ssc:100157679%09red/ssc:100627504%09red/ssc:100154503%09red/ssc:100524961%09red/ssc:100127359%09red/ssc:397674%09red/ssc:100155015%09red/ssc:733648%09red/ssc:396849%09red/ssc:100627149%09red/ssc:100155091%09red/ssc:396623%09red/ssc:397643%09red/ssc:100520187%09red/ssc:100518131%09red/ssc:1005…
Amyotrophic lateral sclerosis (ALS)	KEGG PATHWAY	ssc05014	9	55	0.161419	0.968514	ENSSSCG00000028968|ENSSSCG00000013033|ENSSSCG00000029091|ENSSSCG00000016714|ENSSSCG00000028711|ENSSSCG00000000769|ENSSSCG00000016109|ENSSSCG00000010301|ENSSSCG00000001509	ssc:100627149|ssc:100521065|ssc:100513283|ssc:100170131|ssc:397319|ssc:594852|ssc:100626864|ssc:396603|ssc:100524813|	100627149|100521065|100513283|100170131|397319|594852|100626864|396603|100524813|	RAC1|BAD|APAF1|CYCS, CYC|CASP1|BID|ALS2|PPP3CB|DAXX|	http://www.genome.jp/kegg-bin/show_pathway?ssc05014/ssc:100513283%09red/ssc:100170131%09red/ssc:396603%09red/ssc:397319%09red/ssc:100524813%09red/ssc:100627149%09red/ssc:594852%09red/ssc:100521065%09red/ssc:100626864%09red
Tight junction	KEGG PATHWAY	ssc04530	18	129	0.175787	1	ENSSSCG00000011884|ENSSSCG00000004199|ENSSSCG00000006508|ENSSSCG00000022080|ENSSSCG00000014339|ENSSSCG00000005095|ENSSSCG00000018006|ENSSSCG00000007585|ENSSSCG00000016544|ENSSSCG00000009657|ENSSSCG00000024413|ENSSSCG00000003093|ENSSSCG00000011399|ENSSSCG00000001414|ENSSSCG00000023503|ENSSSCG00000003586|ENSSSCG00000028355|ENSSSCG00000007334	ssc:100521992|ssc:100524836|ssc:100155920|ssc:396849|ssc:100523778|ssc:100152637|ssc:100125538|ssc:414396|ssc:100526194|ssc:397090|ssc:397088|ssc:100512609|ssc:397523|ssc:397211|ssc:100622955|ssc:100515614|ssc:397653|ssc:100154503|	100521992|100524836|100155920|396849|100523778|100152637|100125538|414396|100526194|397090|397088|100512609|397523|397211|100622955|100515614|397653|100154503|	HCLS1|EPB41L2|ASH1L|RHOA|CTNNA1|PKC|MYH1|ACTB|EXOC4|PPP2R2A|PPP2R1A|SYMPK|GNAI2, GBI2|CSNK2B, CK2N, CKII_beta|PRKCD|EPB41|ACTB|SRC, c-Src|	http://www.genome.jp/kegg-bin/show_pathway?ssc04530/ssc:397088%09red/ssc:397211%09red/ssc:100152637%09red/ssc:100512609%09red/ssc:100155920%09red/ssc:100526194%09red/ssc:100515614%09red/ssc:100521992%09red/ssc:100523778%09red/ssc:414396%09red/ssc:100125538%09red/ssc:100154503%09red/ssc:397653%09red/ssc:397523%09red/ssc:397090%09red/ssc:396849%09red/ssc:100622955%09red/ssc:100524836%09red
NF-kappa B signaling pathway	KEGG PATHWAY	ssc04064	13	90	0.193105	1	ENSSSCG00000012981|ENSSSCG00000002525|ENSSSCG00000012203|ENSSSCG00000009542|ENSSSCG00000010548|ENSSSCG00000024771|ENSSSCG00000004110|ENSSSCG00000001952|ENSSSCG00000029475|ENSSSCG00000011251|ENSSSCG00000001414|ENSSSCG00000006250|ENSSSCG00000030408	ssc:100135665|ssc:100156979|ssc:100517796|ssc:100038026|ssc:100135662|ssc:100623776|ssc:100156182|ssc:406188|ssc:100622285|ssc:396646|ssc:397211|ssc:100152890|ssc:396723|	100135665|100156979|100517796|100038026|100135662|100623776|100156182|406188|100622285|396646|397211|100152890|396723|	RELA|TRAF3, TRAF3_TV1|TAB3|TNFSF13B, BAFF|CHUK, IKK-alpha| |TAB2|NFKBIA, ECI-6/IKBA, IKBA| |MYD88|CSNK2B, CK2N, CKII_beta|LYN|DDX58, RHIV-1, RIG-1, RIG-I, RLR-1|	http://www.genome.jp/kegg-bin/show_pathway?ssc04064/ssc:100623776%09red/ssc:100152890%09red/ssc:397211%09red/ssc:100156182%09red/ssc:100622285%09red/ssc:396723%09red/ssc:100038026%09red/ssc:100135665%09red/ssc:396646%09red/ssc:100135662%09red/ssc:100517796%09red/ssc:406188%09red/ssc:100156979%09red
mRNA surveillance pathway	KEGG PATHWAY	ssc03015	12	84	0.214515	1	ENSSSCG00000017155|ENSSSCG00000027323|ENSSSCG00000004169|ENSSSCG00000015558|ENSSSCG00000011433|ENSSSCG00000006063|ENSSSCG00000009657|ENSSSCG00000024413|ENSSSCG00000003093|ENSSSCG00000017477|ENSSSCG00000000635|ENSSSCG00000013083	ssc:100101926|ssc:100156513|ssc:100158211|ssc:100515500|ssc:100522703|ssc:100153958|ssc:397090|ssc:397088|ssc:100512609|ssc:100525426|ssc:100518306|ssc:100519008|	100101926|100156513|100158211|100515500|100522703|100153958|397090|397088|100512609|100525426|100518306|100519008|	EIF4A3, DDX48, eIF4A-III|NCBP2|HBS1L|SMG7|WDR82, WDR82P1|PABPC1|PPP2R2A|PPP2R1A|SYMPK| |MAGOHB|CPSF7|	http://www.genome.jp/kegg-bin/show_pathway?ssc03015/ssc:397088%09red/ssc:100515500%09red/ssc:100156513%09red/ssc:100153958%09red/ssc:100512609%09red/ssc:397090%09red/ssc:100518306%09red/ssc:100519008%09red/ssc:100525426%09red/ssc:100522703%09red/ssc:100101926%09red/ssc:100158211%09red
Prostate cancer	KEGG PATHWAY	ssc05215	12	85	0.224868	1	ENSSSCG00000010638|ENSSSCG00000012981|ENSSSCG00000003395|ENSSSCG00000008478|ENSSSCG00000001701|ENSSSCG00000013033|ENSSSCG00000010548|ENSSSCG00000012275|ENSSSCG00000024960|ENSSSCG00000001952|ENSSSCG00000003413|ENSSSCG00000000068	ssc:100153922|ssc:100135665|ssc:100518131|ssc:100520187|ssc:396742|ssc:100521065|ssc:100135662|ssc:397601|ssc:100515267|ssc:406188|ssc:100127359|ssc:100156226|	100153922|100135665|100518131|100520187|396742|100521065|100135662|397601|100515267|406188|100127359|100156226|	TCF7L2|RELA|PIK3CD| |HSPCB|BAD|CHUK, IKK-alpha|ARAF, ARAF1|PDGFC|NFKBIA, ECI-6/IKBA, IKBA|MTOR, FRAP1|EP300|	http://www.genome.jp/kegg-bin/show_pathway?ssc05215/ssc:100518131%09red/ssc:397601%09red/ssc:100156226%09red/ssc:406188%09red/ssc:100135662%09red/ssc:100515267%09red/ssc:100135665%09red/ssc:100127359%09red/ssc:396742%09red/ssc:100520187%09red/ssc:100153922%09red/ssc:100521065%09red
Fructose and mannose metabolism	KEGG PATHWAY	ssc00051	5	29	0.227414	1	ENSSSCG00000004679|ENSSSCG00000024219|ENSSSCG00000008261|ENSSSCG00000015660|ENSSSCG00000011389	ssc:100158181|ssc:100154112|ssc:494561|ssc:100523270|ssc:100513376|	100158181|100154112|494561|100523270|100513376|	SORD|C5H12orf5|HK2|PFKFB2|GMPPB|	http://www.genome.jp/kegg-bin/show_pathway?ssc00051/ssc:100523270%09red/ssc:494561%09red/ssc:100154112%09red/ssc:100513376%09red/ssc:100158181%09red
Viral carcinogenesis	KEGG PATHWAY	ssc05203	24	189	0.242415	1	ENSSSCG00000008388|ENSSSCG00000022080|ENSSSCG00000028968|ENSSSCG00000001341|ENSSSCG00000024161|ENSSSCG00000001516|ENSSSCG00000017414|ENSSSCG00000016263|ENSSSCG00000002525|ENSSSCG00000017403|ENSSSCG00000016440|ENSSSCG00000010224|ENSSSCG00000006250|ENSSSCG00000003488|ENSSSCG00000013033|ENSSSCG00000025181|ENSSSCG00000000068|ENSSSCG00000012981|ENSSSCG00000003395|ENSSSCG00000026454|ENSSSCG00000007334|…	ssc:100525104|ssc:396849|ssc:100627149|ssc:100135031|ssc:396650|ssc:397543|ssc:100524215|ssc:100516940|ssc:100156979|ssc:733648|ssc:100738744|ssc:100038004|ssc:100152890|ssc:100511934|ssc:100521065|ssc:100523731|ssc:100156226|ssc:100135665|ssc:100518131|ssc:397278|ssc:100154503|ssc:100037289|ssc:406188|ssc:397651|	100525104|396849|100627149|100135031|396650|397543|100524215|100516940|100156979|733648|100738744|100038004|100152890|100511934|100521065|100523731|100156226|100135665|100518131|397278|100154503|100037289|406188|397651|	REL|RHOA|RAC1|SLA-2, SLA-B|SLA-7|BAK, Bak1|KAT2A|SP100|TRAF3, TRAF3_TV1|STAT3| |EGR2|LYN|UBR4|BAD| |EP300|RELA|PIK3CD|PMAIP1, TN3|SRC, c-Src|IRF7|NFKBIA, ECI-6/IKBA, IKBA|VDAC1P5, VDAC3, VDAC5P|	http://www.genome.jp/kegg-bin/show_pathway?ssc05203/ssc:100152890%09red/ssc:100156226%09red/ssc:100154503%09red/ssc:397651%09red/ssc:100521065%09red/ssc:733648%09red/ssc:100525104%09red/ssc:396849%09red/ssc:100627149%09red/ssc:100524215%09red/ssc:100523731%09red/ssc:100156979%09red/ssc:100135665%09red/ssc:406188%09red/ssc:100518131%09red/ssc:100038004%09red/ssc:100037289%09red/ssc:100135031%09red…
Citrate cycle (TCA cycle)	KEGG PATHWAY	ssc00020	5	30	0.245933	1	ENSSSCG00000025881|ENSSSCG00000023807|ENSSSCG00000015443|ENSSSCG00000001852|ENSSSCG00000016743	ssc:100516042|ssc:100628006|ssc:397129|ssc:397603|ssc:100515636|	100516042|100628006|397129|397603|100515636|	PDHB|ACO1|DLD, DLDH|IDH2|OGDH|	http://www.genome.jp/kegg-bin/show_pathway?ssc00020/ssc:100516042%09red/ssc:397129%09red/ssc:100515636%09red/ssc:100628006%09red/ssc:397603%09red
Glycolysis / Gluconeogenesis	KEGG PATHWAY	ssc00010	8	54	0.246842	1	ENSSSCG00000025881|ENSSSCG00000012440|ENSSSCG00000015443|ENSSSCG00000009185|ENSSSCG00000000694|ENSSSCG00000008261|ENSSSCG00000000576|ENSSSCG00000006324	ssc:100516042|ssc:407608|ssc:397129|ssc:100513555|ssc:396823|ssc:494561|ssc:100621540|ssc:100153809|	100516042|407608|397129|100513555|396823|494561|100621540|100153809|	PDHB|PGK1|DLD, DLDH|ADH5|GAPDH, GAPD|HK2|LDHB, LDH-B, LDH-H|ALDH9A1|	http://www.genome.jp/kegg-bin/show_pathway?ssc00010/ssc:407608%09red/ssc:100621540%09red/ssc:100153809%09red/ssc:397129%09red/ssc:100516042%09red/ssc:396823%09red/ssc:494561%09red/ssc:100513555%09red
Malaria	KEGG PATHWAY	ssc05144	8	54	0.246842	1	ENSSSCG00000030066|ENSSSCG00000017277|ENSSSCG00000017723|ENSSSCG00000000423|ENSSSCG00000023150|ENSSSCG00000009003|ENSSSCG00000009002|ENSSSCG00000011251	ssc:397422|ssc:396941|ssc:397422|ssc:100627964|ssc:100514839|ssc:396623|ssc:396623|ssc:396646|	397422|396941|397422|100627964|100514839|396623|396623|396646|	CCL2, MCP-1|PECAM1, CD31, PECAM-1|CCL2, MCP-1|LRP1| |TLR2|TLR2|MYD88|	http://www.genome.jp/kegg-bin/show_pathway?ssc05144/ssc:397422%09red/ssc:100514839%09red/ssc:100627964%09red/ssc:396646%09red/ssc:396623%09red/ssc:396941%09red
HIF-1 signaling pathway	KEGG PATHWAY	ssc04066	14	104	0.248001	1	ENSSSCG00000012981|ENSSSCG00000003395|ENSSSCG00000009123|ENSSSCG00000017403|ENSSSCG00000015660|ENSSSCG00000027628|ENSSSCG00000005169|ENSSSCG00000003413|ENSSSCG00000026635|ENSSSCG00000025881|ENSSSCG00000000694|ENSSSCG00000000068|ENSSSCG00000008261|ENSSSCG00000013564	ssc:100135665|ssc:100518131|ssc:397674|ssc:733648|ssc:100523270|ssc:399522|ssc:100038023|ssc:100127359|ssc:397404|ssc:100516042|ssc:396823|ssc:100156226|ssc:494561|ssc:396755|	100135665|100518131|397674|733648|100523270|399522|100038023|100127359|397404|100516042|396823|100156226|494561|396755|	RELA|PIK3CD|CAMK2D|STAT3|PFKFB2|IL6R, IL-6Ralpha|RPS6|MTOR, FRAP1|SLC2A1, GLUT1|PDHB|GAPDH, GAPD|EP300|HK2|INSR|	http://www.genome.jp/kegg-bin/show_pathway?ssc04066/ssc:100518131%09red/ssc:396755%09red/ssc:733648%09red/ssc:100156226%09red/ssc:100038023%09red/ssc:100135665%09red/ssc:397404%09red/ssc:100523270%09red/ssc:100516042%09red/ssc:100127359%09red/ssc:396823%09red/ssc:397674%09red/ssc:494561%09red/ssc:399522%09red
Valine, leucine and isoleucine degradation	KEGG PATHWAY	ssc00280	7	46	0.24825	1	ENSSSCG00000008571|ENSSSCG00000010790|ENSSSCG00000025942|ENSSSCG00000015443|ENSSSCG00000003192|ENSSSCG00000006324|ENSSSCG00000004846	ssc:397012|ssc:100156927|ssc:100624482|ssc:397129|ssc:100522257|ssc:100153809|ssc:100037986|	397012|100156927|100624482|397129|100522257|100153809|100037986|	HADHA|ECHS1|MCCC1|DLD, DLDH|IL4I1|ALDH9A1|MCEE|	http://www.genome.jp/kegg-bin/show_pathway?ssc00280/ssc:100037986%09red/ssc:100153809%09red/ssc:397012%09red/ssc:100156927%09red/ssc:397129%09red/ssc:100624482%09red/ssc:100522257%09red
Small cell lung cancer	KEGG PATHWAY	ssc05222	12	88	0.257072	1	ENSSSCG00000012981|ENSSSCG00000003395|ENSSSCG00000002525|ENSSSCG00000029091|ENSSSCG00000010548|ENSSSCG00000002282|ENSSSCG00000016714|ENSSSCG00000015618|ENSSSCG00000001952|ENSSSCG00000005965|ENSSSCG00000009544|ENSSSCG00000009545	ssc:100135665|ssc:100518131|ssc:100156979|ssc:100513283|ssc:100135662|ssc:100517170|ssc:100170131|ssc:100513489|ssc:406188|ssc:448810|ssc:100515336|ssc:100153454|	100135665|100518131|100156979|100513283|100135662|100517170|100170131|100513489|406188|448810|100515336|100153454|	RELA|PIK3CD|TRAF3, TRAF3_TV1|APAF1|CHUK, IKK-alpha|MAX|CYCS, CYC|LAMB3|NFKBIA, ECI-6/IKBA, IKBA|MYC|COL4A1|COL4A2|	http://www.genome.jp/kegg-bin/show_pathway?ssc05222/ssc:448810%09red/ssc:100513283%09red/ssc:100170131%09red/ssc:100515336%09red/ssc:100513489%09red/ssc:100135665%09red/ssc:100518131%09red/ssc:100135662%09red/ssc:100517170%09red/ssc:100153454%09red/ssc:406188%09red/ssc:100156979%09red
Viral myocarditis	KEGG PATHWAY	ssc05416	9	63	0.25755	1	ENSSSCG00000016714|ENSSSCG00000028968|ENSSSCG00000004421|ENSSSCG00000030255|ENSSSCG00000000769|ENSSSCG00000007585|ENSSSCG00000024161|ENSSSCG00000001341|ENSSSCG00000028355	ssc:100170131|ssc:100627149|ssc:791125|ssc:449528|ssc:594852|ssc:414396|ssc:396650|ssc:100135031|ssc:397653|	100170131|100627149|791125|449528|594852|414396|396650|100135031|397653|	CYCS, CYC|RAC1|FYN, PKC|EIF4G1, EIF4GI|BID|ACTB|SLA-7|SLA-2, SLA-B|ACTB|	http://www.genome.jp/kegg-bin/show_pathway?ssc05416/ssc:791125%09red/ssc:100170131%09red/ssc:414396%09red/ssc:396650%09red/ssc:100135031%09red/ssc:449528%09red/ssc:397653%09red/ssc:100627149%09red/ssc:594852%09red
Dorso-ventral axis formation	KEGG PATHWAY	ssc04320	4	23	0.26096	1	ENSSSCG00000024152|ENSSSCG00000008478|ENSSSCG00000006709|ENSSSCG00000001561	ssc:100157726|ssc:100520187|ssc:100153369|ssc:100156210|	100157726|100520187|100153369|100156210|	ETV6| |NOTCH2|ETV7|	http://www.genome.jp/kegg-bin/show_pathway?ssc04320/ssc:100153369%09red/ssc:100156210%09red/ssc:100157726%09red/ssc:100520187%09red
Alzheimer's disease	KEGG PATHWAY	ssc05010	22	175	0.26785	1	ENSSSCG00000018080|ENSSSCG00000027344|ENSSSCG00000017279|ENSSSCG00000023150|ENSSSCG00000000769|ENSSSCG00000000555|ENSSSCG00000023277|ENSSSCG00000000423|ENSSSCG00000014371|ENSSSCG00000016714|ENSSSCG00000014145|ENSSSCG00000008466|ENSSSCG00000000694|ENSSSCG00000008208|ENSSSCG00000013033|ENSSSCG00000013034|ENSSSCG00000013596|ENSSSCG00000011356|ENSSSCG00000029091|ENSSSCG00000010795|ENSSSCG00000018094|…	ssc:808505|ssc:396875|ssc:100510978|ssc:100514839|ssc:594852|ssc:100155015|ssc:100515069|ssc:100627964|ssc:100520950|ssc:100170131|ssc:100037990|ssc:100516606|ssc:396823|ssc:100513348|ssc:100521065|ssc:100525148|ssc:100517634|ssc:100156879|ssc:100513283|ssc:100312976|ssc:808513|ssc:396603|	808505|396875|100510978|100514839|594852|100155015|100515069|100627964|100520950|100170131|100037990|100516606|396823|100513348|100521065|100525148|100517634|100156879|100513283|100312976|808513|396603|	ATP8|ATP2A2, ATP2, SERCA2|ERN1| |BID|ITPR3|NDUFA1|LRP1|NDUFA2|CYCS, CYC|COX7C, COX7C1| |GAPDH, GAPD|EIF2AK3|BAD|PLCB3|NDUFA7| |APAF1|NDUFAB1|CYTB|PPP3CB|	http://www.genome.jp/kegg-bin/show_pathway?ssc05010/ssc:100312976%09red/ssc:100513283%09red/ssc:100521065%09red/ssc:100525148%09red/ssc:808513%09red/ssc:100170131%09red/ssc:396603%09red/ssc:100513348%09red/ssc:100156879%09red/ssc:396823%09red/ssc:100515069%09red/ssc:100510978%09red/ssc:100517634%09red/ssc:100516606%09red/ssc:100520950%09red/ssc:594852%09red/ssc:100627964%09red/ssc:808505%09red/ss…
Renal cell carcinoma	KEGG PATHWAY	ssc05211	9	64	0.270715	1	ENSSSCG00000003395|ENSSSCG00000011843|ENSSSCG00000028968|ENSSSCG00000011842|ENSSSCG00000012275|ENSSSCG00000008443|ENSSSCG00000008478|ENSSSCG00000026635|ENSSSCG00000000068	ssc:100518131|ssc:100511837|ssc:100627149|ssc:100525766|ssc:397601|ssc:100037272|ssc:100520187|ssc:397404|ssc:100156226|	100518131|100511837|100627149|100525766|397601|100037272|100520187|397404|100156226|	PIK3CD|PAK2|RAC1|PAK1|ARAF, ARAF1|EPAS1, EPAS, EPAS-1| |SLC2A1, GLUT1|EP300|	http://www.genome.jp/kegg-bin/show_pathway?ssc05211/ssc:100511837%09red/ssc:100518131%09red/ssc:100525766%09red/ssc:100037272%09red/ssc:397601%09red/ssc:100156226%09red/ssc:397404%09red/ssc:100627149%09red/ssc:100520187%09red
Type II diabetes mellitus	KEGG PATHWAY	ssc04930	7	48	0.27893	1	ENSSSCG00000010380|ENSSSCG00000003395|ENSSSCG00000023503|ENSSSCG00000027855|ENSSSCG00000003413|ENSSSCG00000008261|ENSSSCG00000013564	ssc:396610|ssc:100518131|ssc:100622955|ssc:100307052|ssc:100127359|ssc:494561|ssc:396755|	396610|100518131|100622955|100307052|100127359|494561|396755|	MAPK8, JNK, JNK1|PIK3CD|PRKCD|SOCS1|MTOR, FRAP1|HK2|INSR|	http://www.genome.jp/kegg-bin/show_pathway?ssc04930/ssc:100518131%09red/ssc:396610%09red/ssc:494561%09red/ssc:100307052%09red/ssc:100127359%09red/ssc:100622955%09red/ssc:396755%09red
Osteoclast differentiation	KEGG PATHWAY	ssc04380	17	133	0.279882	1	ENSSSCG00000010380|ENSSSCG00000012981|ENSSSCG00000003395|ENSSSCG00000006678|ENSSSCG00000000396|ENSSSCG00000028968|ENSSSCG00000017006|ENSSSCG00000010548|ENSSSCG00000027855|ENSSSCG00000004421|ENSSSCG00000002919|ENSSSCG00000004110|ENSSSCG00000001952|ENSSSCG00000008820|ENSSSCG00000010301|ENSSSCG00000030433|ENSSSCG00000016057	ssc:396610|ssc:100135665|ssc:100518131|ssc:613130|ssc:396923|ssc:100627149|ssc:100511843|ssc:100135662|ssc:100307052|ssc:791125|ssc:397405|ssc:100156182|ssc:406188|ssc:404277|ssc:396603|ssc:100517285|ssc:396655|	396610|100135665|100518131|613130|396923|100627149|100511843|100135662|100307052|791125|397405|100156182|406188|404277|396603|100517285|396655|	MAPK8, JNK, JNK1|RELA|PIK3CD|FCGR1A|STAT2|RAC1|LCP2|CHUK, IKK-alpha|SOCS1|FYN, PKC|TYROBP|TAB2|NFKBIA, ECI-6/IKBA, IKBA|TEC|PPP3CB| |STAT1|	http://www.genome.jp/kegg-bin/show_pathway?ssc04380/ssc:100518131%09red/ssc:791125%09red/ssc:404277%09red/ssc:100135662%09red/ssc:100135665%09red/ssc:100156182%09red/ssc:100517285%09red/ssc:396603%09red/ssc:100307052%09red/ssc:613130%09red/ssc:397405%09red/ssc:396923%09red/ssc:100627149%09red/ssc:396655%09red/ssc:406188%09red/ssc:396610%09red/ssc:100511843%09red
Carbon metabolism	KEGG PATHWAY	ssc01200	13	99	0.284469	1	ENSSSCG00000025881|ENSSSCG00000010790|ENSSSCG00000001852|ENSSSCG00000015443|ENSSSCG00000008207|ENSSSCG00000012440|ENSSSCG00000008571|ENSSSCG00000009185|ENSSSCG00000000694|ENSSSCG00000023807|ENSSSCG00000008261|ENSSSCG00000004846|ENSSSCG00000016743	ssc:100516042|ssc:100156927|ssc:397603|ssc:397129|ssc:100038014|ssc:407608|ssc:397012|ssc:100513555|ssc:396823|ssc:100628006|ssc:494561|ssc:100037986|ssc:100515636|	100516042|100156927|397603|397129|100038014|407608|397012|100513555|396823|100628006|494561|100037986|100515636|	PDHB|ECHS1|IDH2|DLD, DLDH|RPIA|PGK1|HADHA|ADH5|GAPDH, GAPD|ACO1|HK2|MCEE|OGDH|	http://www.genome.jp/kegg-bin/show_pathway?ssc01200/ssc:407608%09red/ssc:100038014%09red/ssc:397603%09red/ssc:100037986%09red/ssc:100515636%09red/ssc:100628006%09red/ssc:397129%09red/ssc:397012%09red/ssc:100516042%09red/ssc:100156927%09red/ssc:396823%09red/ssc:494561%09red/ssc:100513555%09red
Non-alcoholic fatty liver disease (NAFLD)	KEGG PATHWAY	ssc04932	20	160	0.287952	1	ENSSSCG00000008208|ENSSSCG00000012981|ENSSSCG00000003395|ENSSSCG00000023277|ENSSSCG00000028968|ENSSSCG00000014371|ENSSSCG00000010380|ENSSSCG00000017279|ENSSSCG00000016714|ENSSSCG00000010795|ENSSSCG00000014145|ENSSSCG00000027628|ENSSSCG00000009794|ENSSSCG00000000769|ENSSSCG00000008466|ENSSSCG00000013596|ENSSSCG00000018094|ENSSSCG00000011356|ENSSSCG00000006703|ENSSSCG00000013564	ssc:100513348|ssc:100135665|ssc:100518131|ssc:100515069|ssc:100627149|ssc:100520950|ssc:396610|ssc:100510978|ssc:100170131|ssc:100312976|ssc:100037990|ssc:399522|ssc:100156510|ssc:594852|ssc:100516606|ssc:100517634|ssc:808513|ssc:100156879|ssc:100157793|ssc:396755|	100513348|100135665|100518131|100515069|100627149|100520950|396610|100510978|100170131|100312976|100037990|399522|100156510|594852|100516606|100517634|808513|100156879|100157793|396755|	EIF2AK3|RELA|PIK3CD|NDUFA1|RAC1|NDUFA2|MAPK8, JNK, JNK1|ERN1|CYCS, CYC|NDUFAB1|COX7C, COX7C1|IL6R, IL-6Ralpha|MLXIP|BID| |NDUFA7|CYTB| |PRKAB2|INSR|	http://www.genome.jp/kegg-bin/show_pathway?ssc04932/ssc:100518131%09red/ssc:100515069%09red/ssc:808513%09red/ssc:100312976%09red/ssc:100156510%09red/ssc:100170131%09red/ssc:100037990%09red/ssc:396610%09red/ssc:396755%09red/ssc:100517634%09red/ssc:100156879%09red/ssc:100513348%09red/ssc:100135665%09red/ssc:100516606%09red/ssc:100627149%09red/ssc:100157793%09red/ssc:100520950%09red/ssc:594852%09red…
Natural killer cell mediated cytotoxicity	KEGG PATHWAY	ssc04650	14	108	0.288815	1	ENSSSCG00000010301|ENSSSCG00000003395|ENSSSCG00000028968|ENSSSCG00000017006|ENSSSCG00000011842|ENSSSCG00000012275|ENSSSCG00000004421|ENSSSCG00000025026|ENSSSCG00000000769|ENSSSCG00000008478|ENSSSCG00000009664|ENSSSCG00000020906|ENSSSCG00000009637|ENSSSCG00000002919	ssc:396603|ssc:100518131|ssc:100627149|ssc:100511843|ssc:100525766|ssc:397601|ssc:791125|ssc:100739353|ssc:594852|ssc:100520187|ssc:100157507|ssc:406191|ssc:100624226|ssc:397405|	396603|100518131|100627149|100511843|100525766|397601|791125|100739353|594852|100520187|100157507|406191|100624226|397405|	PPP3CB|PIK3CD|RAC1|LCP2|PAK1|ARAF, ARAF1|FYN, PKC| |BID| |PTK2B|TNFSF10, TRAIL| |TYROBP|	http://www.genome.jp/kegg-bin/show_pathway?ssc04650/ssc:100518131%09red/ssc:791125%09red/ssc:397601%09red/ssc:100627149%09red/ssc:100520187%09red/ssc:406191%09red/ssc:396603%09red/ssc:100525766%09red/ssc:397405%09red/ssc:100624226%09red/ssc:100157507%09red/ssc:594852%09red/ssc:100511843%09red/ssc:100739353%09red
Inositol phosphate metabolism	KEGG PATHWAY	ssc00562	8	57	0.289414	1	ENSSSCG00000005629|ENSSSCG00000003395|ENSSSCG00000027340|ENSSSCG00000016147|ENSSSCG00000010092|ENSSSCG00000012035|ENSSSCG00000016050|ENSSSCG00000013034	ssc:100523714|ssc:100518131|ssc:100623115|ssc:100521692|ssc:100157143|ssc:100525664|ssc:100514878|ssc:100525148|	100523714|100518131|100623115|100521692|100157143|100525664|100514878|100525148|	PIP5KL1|PIK3CD|PI4K2B|PIKFYVE|PI4KA|SYNJ1|INPP1|PLCB3|	http://www.genome.jp/kegg-bin/show_pathway?ssc00562/ssc:100514878%09red/ssc:100518131%09red/ssc:100523714%09red/ssc:100525664%09red/ssc:100157143%09red/ssc:100525148%09red/ssc:100623115%09red/ssc:100521692%09red
Tryptophan metabolism	KEGG PATHWAY	ssc00380	6	41	0.299447	1	ENSSSCG00000008571|ENSSSCG00000010790|ENSSSCG00000003192|ENSSSCG00000006324|ENSSSCG00000007007|ENSSSCG00000016743	ssc:397012|ssc:100156927|ssc:100522257|ssc:100153809|ssc:100519877|ssc:100515636|	397012|100156927|100522257|100153809|100519877|100515636|	HADHA|ECHS1|IL4I1|ALDH9A1|IDO1, IDO|OGDH|	http://www.genome.jp/kegg-bin/show_pathway?ssc00380/ssc:100156927%09red/ssc:100153809%09red/ssc:397012%09red/ssc:100515636%09red/ssc:100522257%09red/ssc:100519877%09red
Epstein-Barr virus infection	KEGG PATHWAY	ssc05169	23	189	0.309789	1	ENSSSCG00000008742|ENSSSCG00000001341|ENSSSCG00000028278|ENSSSCG00000001414|ENSSSCG00000030408|ENSSSCG00000002525|ENSSSCG00000017403|ENSSSCG00000010548|ENSSSCG00000006250|ENSSSCG00000007970|ENSSSCG00000008208|ENSSSCG00000024161|ENSSSCG00000025181|ENSSSCG00000000068|ENSSSCG00000005965|ENSSSCG00000010380|ENSSSCG00000012981|ENSSSCG00000003395|ENSSSCG00000005711|ENSSSCG00000004110|ENSSSCG00000001952|…	ssc:100511702|ssc:100135031|ssc:100737040|ssc:397211|ssc:396723|ssc:100156979|ssc:733648|ssc:100135662|ssc:100152890|ssc:100521261|ssc:100513348|ssc:396650|ssc:100523731|ssc:100156226|ssc:448810|ssc:396610|ssc:100135665|ssc:100518131|ssc:100155564|ssc:100156182|ssc:406188|ssc:733643|ssc:396702|	100511702|100135031|100737040|397211|396723|100156979|733648|100135662|100152890|100521261|100513348|396650|100523731|100156226|448810|396610|100135665|100518131|100155564|100156182|406188|733643|396702|	CD38|SLA-2, SLA-B|POLR2A|CSNK2B, CK2N, CKII_beta|DDX58, RHIV-1, RIG-1, RIG-I, RLR-1|TRAF3, TRAF3_TV1|STAT3|CHUK, IKK-alpha|LYN|POLR3K|EIF2AK3|SLA-7| |EP300|MYC|MAPK8, JNK, JNK1|RELA|PIK3CD|NUP214|TAB2|NFKBIA, ECI-6/IKBA, IKBA| |CD58|	http://www.genome.jp/kegg-bin/show_pathway?ssc05169/ssc:100737040%09red/ssc:448810%09red/ssc:100152890%09red/ssc:100156226%09red/ssc:100155564%09red/ssc:733648%09red/ssc:396723%09red/ssc:733643%09red/ssc:100513348%09red/ssc:100156182%09red/ssc:396702%09red/ssc:100523731%09red/ssc:100156979%09red/ssc:100135665%09red/ssc:100135662%09red/ssc:406188%09red/ssc:100518131%09red/ssc:397211%09red/ssc:3966…
Endocrine and other factor-regulated calcium reabsorption	KEGG PATHWAY	ssc04961	6	42	0.31694	1	ENSSSCG00000014058|ENSSSCG00000017666|ENSSSCG00000013034|ENSSSCG00000006740|ENSSSCG00000006125|ENSSSCG00000022659	ssc:100525860|ssc:100271929|ssc:100525148|ssc:397481|ssc:100153645|ssc:100271929|	100525860|100271929|100525148|397481|100153645|100271929|	CLTB|CLTC|PLCB3|ATP1A1|CALB1|CLTC|	http://www.genome.jp/kegg-bin/show_pathway?ssc04961/ssc:100271929%09red/ssc:100525148%09red/ssc:397481%09red/ssc:100525860%09red/ssc:100153645%09red
Huntington's disease	KEGG PATHWAY	ssc05016	23	190	0.317945	1	ENSSSCG00000018080|ENSSSCG00000017666|ENSSSCG00000028278|ENSSSCG00000024694|ENSSSCG00000023277|ENSSSCG00000014371|ENSSSCG00000016714|ENSSSCG00000014145|ENSSSCG00000008466|ENSSSCG00000023522|ENSSSCG00000022659|ENSSSCG00000029876|ENSSSCG00000013034|ENSSSCG00000013596|ENSSSCG00000000068|ENSSSCG00000011356|ENSSSCG00000014058|ENSSSCG00000029091|ENSSSCG00000010795|ENSSSCG00000007026|ENSSSCG00000018094|…	ssc:808505|ssc:100271929|ssc:100737040|ssc:100626452|ssc:100515069|ssc:100520950|ssc:100170131|ssc:100037990|ssc:100516606|ssc:100154530|ssc:100271929|ssc:100154319|ssc:100525148|ssc:100517634|ssc:100156226|ssc:100156879|ssc:100525860|ssc:100513283|ssc:100312976|ssc:397651|ssc:808513|ssc:100621221|ssc:397014|	808505|100271929|100737040|100626452|100515069|100520950|100170131|100037990|100516606|100154530|100271929|100154319|100525148|100517634|100156226|100156879|100525860|100513283|100312976|397651|808513|100621221|397014|	ATP8|CLTC|POLR2A|TAF4|NDUFA1|NDUFA2|CYCS, CYC|COX7C, COX7C1| | |CLTC|SOD2|PLCB3|NDUFA7|EP300| |CLTB|APAF1|NDUFAB1|VDAC1P5, VDAC3, VDAC5P|CYTB|SIN3A|HDH|	http://www.genome.jp/kegg-bin/show_pathway?ssc05016/ssc:100737040%09red/ssc:100312976%09red/ssc:100513283%09red/ssc:100626452%09red/ssc:100156226%09red/ssc:397651%09red/ssc:100525148%09red/ssc:808513%09red/ssc:100170131%09red/ssc:100156879%09red/ssc:100515069%09red/ssc:100525860%09red/ssc:100517634%09red/ssc:100516606%09red/ssc:100520950%09red/ssc:100154530%09red/ssc:100271929%09red/ssc:808505%09…
Propanoate metabolism	KEGG PATHWAY	ssc00640	4	26	0.328396	1	ENSSSCG00000000576|ENSSSCG00000008571|ENSSSCG00000004846|ENSSSCG00000010790	ssc:100621540|ssc:397012|ssc:100037986|ssc:100156927|	100621540|397012|100037986|100156927|	LDHB, LDH-B, LDH-H|HADHA|MCEE|ECHS1|	http://www.genome.jp/kegg-bin/show_pathway?ssc00640/ssc:100037986%09red/ssc:397012%09red/ssc:100621540%09red/ssc:100156927%09red
Collecting duct acid secretion	KEGG PATHWAY	ssc04966	4	26	0.328396	1	ENSSSCG00000017401|ENSSSCG00000008056|ENSSSCG00000005491|ENSSSCG00000006054	ssc:100523018|ssc:100518959|ssc:100154379|ssc:100154942|	100523018|100518959|100154379|100154942|	ATP6V0A1|ATP6V0C|ATP6V1G1|ATP6V1C1|	http://www.genome.jp/kegg-bin/show_pathway?ssc04966/ssc:100523018%09red/ssc:100518959%09red/ssc:100154942%09red/ssc:100154379%09red
Circadian rhythm	KEGG PATHWAY	ssc04710	4	26	0.328396	1	ENSSSCG00000011534|ENSSSCG00000017983|ENSSSCG00000006703|ENSSSCG00000028552	ssc:100514873|ssc:100620648|ssc:100157793|ssc:100626912|	100514873|100620648|100157793|100626912|	BHLHE40|PER1|PRKAB2|BHLHE41|	http://www.genome.jp/kegg-bin/show_pathway?ssc04710/ssc:100620648%09red/ssc:100514873%09red/ssc:100626912%09red/ssc:100157793%09red
ABC transporters	KEGG PATHWAY	ssc02010	6	43	0.334582	1	ENSSSCG00000012779|ENSSSCG00000016210|ENSSSCG00000017561|ENSSSCG00000020893|ENSSSCG00000002362|ENSSSCG00000025173	ssc:100519529|ssc:100155585|ssc:100513231|ssc:733649|ssc:100152503|ssc:733650|	100519529|100155585|100513231|733649|100152503|733650|	ABCD1|ABCB6|ABCC3|TAP1| |TAP2|	http://www.genome.jp/kegg-bin/show_pathway?ssc02010/ssc:100513231%09red/ssc:733649%09red/ssc:733650%09red/ssc:100519529%09red/ssc:100152503%09red/ssc:100155585%09red
Focal adhesion	KEGG PATHWAY	ssc04510	23	194	0.351146	1	ENSSSCG00000024960|ENSSSCG00000022080|ENSSSCG00000028968|ENSSSCG00000028355|ENSSSCG00000003107|ENSSSCG00000021349|ENSSSCG00000010313|ENSSSCG00000015618|ENSSSCG00000000025|ENSSSCG00000013033|ENSSSCG00000011842|ENSSSCG00000011843|ENSSSCG00000016034|ENSSSCG00000009544|ENSSSCG00000009545|ENSSSCG00000010380|ENSSSCG00000003395|ENSSSCG00000007334|ENSSSCG00000000293|ENSSSCG00000004421|ENSSSCG00000007585|…	ssc:100515267|ssc:396849|ssc:100627149|ssc:397653|ssc:100514580|ssc:396974|ssc:396974|ssc:100513489|ssc:100520379|ssc:100521065|ssc:100525766|ssc:100511837|ssc:100152001|ssc:100515336|ssc:100153454|ssc:396610|ssc:100518131|ssc:100154503|ssc:100155091|ssc:791125|ssc:414396|ssc:100520187|ssc:100511072|	100515267|396849|100627149|397653|100514580|396974|396974|100513489|100520379|100521065|100525766|100511837|100152001|100515336|100153454|396610|100518131|100154503|100155091|791125|414396|100520187|100511072|	PDGFC|RHOA|RAC1|ACTB| |VCL|VCL|LAMB3|PARVG|BAD|PAK1|PAK2|COL3A1|COL4A1|COL4A2|MAPK8, JNK, JNK1|PIK3CD|SRC, c-Src|ITGA5|FYN, PKC|ACTB| |DIAPH1|	http://www.genome.jp/kegg-bin/show_pathway?ssc04510/ssc:791125%09red/ssc:414396%09red/ssc:100515267%09red/ssc:100154503%09red/ssc:397653%09red/ssc:100153454%09red/ssc:100513489%09red/ssc:100521065%09red/ssc:100520379%09red/ssc:396974%09red/ssc:396849%09red/ssc:100152001%09red/ssc:100627149%09red/ssc:100155091%09red/ssc:100518131%09red/ssc:100515336%09red/ssc:100511072%09red/ssc:100520187%09red/ss…
Adipocytokine signaling pathway	KEGG PATHWAY	ssc04920	9	70	0.353071	1	ENSSSCG00000010380|ENSSSCG00000012981|ENSSSCG00000017403|ENSSSCG00000010548|ENSSSCG00000002775|ENSSSCG00000001952|ENSSSCG00000003413|ENSSSCG00000026635|ENSSSCG00000006703	ssc:396610|ssc:100135665|ssc:733648|ssc:100135662|ssc:397275|ssc:406188|ssc:100127359|ssc:397404|ssc:100157793|	396610|100135665|733648|100135662|397275|406188|100127359|397404|100157793|	MAPK8, JNK, JNK1|RELA|STAT3|CHUK, IKK-alpha|AGRP|NFKBIA, ECI-6/IKBA, IKBA|MTOR, FRAP1|SLC2A1, GLUT1|PRKAB2|	http://www.genome.jp/kegg-bin/show_pathway?ssc04920/ssc:100135662%09red/ssc:733648%09red/ssc:396610%09red/ssc:100135665%09red/ssc:397404%09red/ssc:397275%09red/ssc:100127359%09red/ssc:100157793%09red/ssc:406188%09red
Platelet activation	KEGG PATHWAY	ssc04611	16	132	0.355995	1	ENSSSCG00000003395|ENSSSCG00000030156|ENSSSCG00000022080|ENSSSCG00000021707|ENSSSCG00000017006|ENSSSCG00000016034|ENSSSCG00000003107|ENSSSCG00000004421|ENSSSCG00000007585|ENSSSCG00000013034|ENSSSCG00000000555|ENSSSCG00000011399|ENSSSCG00000004791|ENSSSCG00000006250|ENSSSCG00000028355|ENSSSCG00000007334	ssc:100518131|ssc:100514179|ssc:396849|ssc:100620994|ssc:100511843|ssc:100152001|ssc:100514580|ssc:791125|ssc:414396|ssc:100525148|ssc:100155015|ssc:397523|ssc:100522721|ssc:100152890|ssc:397653|ssc:100154503|	100518131|100514179|396849|100620994|100511843|100152001|100514580|791125|414396|100525148|100155015|397523|100522721|100152890|397653|100154503|	PIK3CD|APBB1IP|RHOA| |LCP2|COL3A1| |FYN, PKC|ACTB|PLCB3|ITPR3|GNAI2, GBI2|RASGRP1|LYN|ACTB|SRC, c-Src|	http://www.genome.jp/kegg-bin/show_pathway?ssc04611/ssc:100522721%09red/ssc:100514179%09red/ssc:791125%09red/ssc:100152890%09red/ssc:100514580%09red/ssc:414396%09red/ssc:100525148%09red/ssc:100154503%09red/ssc:397653%09red/ssc:100511843%09red/ssc:397523%09red/ssc:396849%09red/ssc:100518131%09red/ssc:100620994%09red/ssc:100152001%09red/ssc:100155015%09red
Ras signaling pathway	KEGG PATHWAY	ssc04014	26	223	0.367579	1	ENSSSCG00000008388|ENSSSCG00000024960|ENSSSCG00000022080|ENSSSCG00000028968|ENSSSCG00000003497|ENSSSCG00000012399|ENSSSCG00000013564|ENSSSCG00000015563|ENSSSCG00000010548|ENSSSCG00000017753|ENSSSCG00000003140|ENSSSCG00000013033|ENSSSCG00000011842|ENSSSCG00000011843|ENSSSCG00000009086|ENSSSCG00000028887|ENSSSCG00000010380|ENSSSCG00000012981|ENSSSCG00000003395|ENSSSCG00000005738|ENSSSCG00000017748|…	ssc:100525104|ssc:100515267|ssc:396849|ssc:100627149|ssc:100512662|ssc:733705|ssc:396755|ssc:100515847|ssc:100135662|ssc:100511282|ssc:100302504|ssc:100521065|ssc:100525766|ssc:100511837|ssc:397643|ssc:414900|ssc:396610|ssc:100135665|ssc:100518131|ssc:100513970|ssc:100526136|ssc:100522392|ssc:100517317|ssc:100519155|ssc:100520187|ssc:100522721|	100525104|100515267|396849|100627149|100512662|733705|396755|100515847|100135662|100511282|100302504|100521065|100525766|100511837|397643|414900|396610|100135665|100518131|100513970|100526136|100522392|100517317|100519155|100520187|100522721|	REL|PDGFC|RHOA|RAC1|PLA2G2D|FOXO4, MLLT7|INSR|RGL1|CHUK, IKK-alpha|KSR1|FGF21|BAD|PAK1|PAK2|FGF2|PLD2|MAPK8, JNK, JNK1|RELA|PIK3CD|RALGDS|NF1|RASAL2| |RALBP1| |RASGRP1|	http://www.genome.jp/kegg-bin/show_pathway?ssc04014/ssc:100519155%09red/ssc:100512662%09red/ssc:100513970%09red/ssc:100515267%09red/ssc:414900%09red/ssc:100302504%09red/ssc:100521065%09red/ssc:100517317%09red/ssc:733705%09red/ssc:100525104%09red/ssc:396849%09red/ssc:100627149%09red/ssc:100518131%09red/ssc:100522392%09red/ssc:100511837%09red/ssc:100526136%09red/ssc:100135665%09red/ssc:397643%09red…
beta-Alanine metabolism	KEGG PATHWAY	ssc00410	4	28	0.373941	1	ENSSSCG00000008571|ENSSSCG00000023107|ENSSSCG00000006324|ENSSSCG00000010790	ssc:397012|ssc:100152781|ssc:100153809|ssc:100156927|	397012|100152781|100153809|100156927|	HADHA|SMOX|ALDH9A1|ECHS1|	http://www.genome.jp/kegg-bin/show_pathway?ssc00410/ssc:100152781%09red/ssc:397012%09red/ssc:100153809%09red/ssc:100156927%09red
Retinol metabolism	KEGG PATHWAY	ssc00830	7	54	0.3752	1	ENSSSCG00000016308|ENSSSCG00000029042|ENSSSCG00000023320|ENSSSCG00000009185|ENSSSCG00000010491|ENSSSCG00000002013|ENSSSCG00000026798	ssc:100511479|ssc:100519223|ssc:100144468|ssc:100513555|ssc:403111|ssc:397082|ssc:403111|	100511479|100519223|100144468|100513555|403111|397082|403111|	UGT1A3, UGT1A1| |CYP3A22|ADH5|CYP2C42|DHRS4, PSCD|CYP2C42|	http://www.genome.jp/kegg-bin/show_pathway?ssc00830/ssc:100519223%09red/ssc:403111%09red/ssc:397082%09red/ssc:100511479%09red/ssc:100144468%09red/ssc:100513555%09red
Fc epsilon RI signaling pathway	KEGG PATHWAY	ssc04664	8	63	0.378763	1	ENSSSCG00000010380|ENSSSCG00000003395|ENSSSCG00000028968|ENSSSCG00000017006|ENSSSCG00000014278|ENSSSCG00000004421|ENSSSCG00000008478|ENSSSCG00000006250	ssc:396610|ssc:100518131|ssc:100627149|ssc:100511843|ssc:397409|ssc:791125|ssc:100520187|ssc:100152890|	396610|100518131|100627149|100511843|397409|791125|100520187|100152890|	MAPK8, JNK, JNK1|PIK3CD|RAC1|LCP2|IL-5, IL5|FYN, PKC| |LYN|	http://www.genome.jp/kegg-bin/show_pathway?ssc04664/ssc:100518131%09red/ssc:791125%09red/ssc:100152890%09red/ssc:396610%09red/ssc:100511843%09red/ssc:100627149%09red/ssc:100520187%09red/ssc:397409%09red
Leishmaniasis	KEGG PATHWAY	ssc05140	8	63	0.378763	1	ENSSSCG00000012981|ENSSSCG00000004110|ENSSSCG00000001952|ENSSSCG00000009003|ENSSSCG00000009002|ENSSSCG00000011251|ENSSSCG00000006678|ENSSSCG00000016057	ssc:100135665|ssc:100156182|ssc:406188|ssc:396623|ssc:396623|ssc:396646|ssc:613130|ssc:396655|	100135665|100156182|406188|396623|396623|396646|613130|396655|	RELA|TAB2|NFKBIA, ECI-6/IKBA, IKBA|TLR2|TLR2|MYD88|FCGR1A|STAT1|	http://www.genome.jp/kegg-bin/show_pathway?ssc05140/ssc:100135665%09red/ssc:100156182%09red/ssc:613130%09red/ssc:396646%09red/ssc:396623%09red/ssc:396655%09red/ssc:406188%09red
B cell receptor signaling pathway	KEGG PATHWAY	ssc04662	9	72	0.381328	1	ENSSSCG00000012981|ENSSSCG00000003395|ENSSSCG00000028968|ENSSSCG00000010548|ENSSSCG00000010509|ENSSSCG00000001952|ENSSSCG00000008478|ENSSSCG00000010301|ENSSSCG00000006250	ssc:100135665|ssc:100518131|ssc:100627149|ssc:100135662|ssc:100155165|ssc:406188|ssc:100520187|ssc:396603|ssc:100152890|	100135665|100518131|100627149|100135662|100155165|406188|100520187|396603|100152890|	RELA|PIK3CD|RAC1|CHUK, IKK-alpha|PIK3AP1|NFKBIA, ECI-6/IKBA, IKBA| |PPP3CB|LYN|	http://www.genome.jp/kegg-bin/show_pathway?ssc04662/ssc:100518131%09red/ssc:100627149%09red/ssc:100152890%09red/ssc:406188%09red/ssc:396603%09red/ssc:100135665%09red/ssc:100135662%09red/ssc:100155165%09red/ssc:100520187%09red
Pyruvate metabolism	KEGG PATHWAY	ssc00620	5	37	0.382602	1	ENSSSCG00000025881|ENSSSCG00000005349|ENSSSCG00000000576|ENSSSCG00000015443|ENSSSCG00000006324	ssc:100516042|ssc:100154014|ssc:100621540|ssc:397129|ssc:100153809|	100516042|100154014|100621540|397129|100153809|	PDHB|GRHPR|LDHB, LDH-B, LDH-H|DLD, DLDH|ALDH9A1|	http://www.genome.jp/kegg-bin/show_pathway?ssc00620/ssc:397129%09red/ssc:100153809%09red/ssc:100154014%09red/ssc:100621540%09red/ssc:100516042%09red
Primary immunodeficiency	KEGG PATHWAY	ssc05340	5	37	0.382602	1	ENSSSCG00000025173|ENSSSCG00000016832|ENSSSCG00000020893|ENSSSCG00000006625|ENSSSCG00000012397	ssc:733650|ssc:100271930|ssc:733649|ssc:100517711|ssc:397156|	733650|100271930|733649|100517711|397156|	TAP2|IL7R, CD127|TAP1|RFX5|IL2RG|	http://www.genome.jp/kegg-bin/show_pathway?ssc05340/ssc:100271930%09red/ssc:733650%09red/ssc:100517711%09red/ssc:397156%09red/ssc:733649%09red
Gap junction	KEGG PATHWAY	ssc04540	11	90	0.384537	1	ENSSSCG00000008478|ENSSSCG00000007334|ENSSSCG00000013545|ENSSSCG00000021707|ENSSSCG00000005457|ENSSSCG00000013034|ENSSSCG00000024960|ENSSSCG00000009406|ENSSSCG00000000555|ENSSSCG00000011399|ENSSSCG00000004241	ssc:100520187|ssc:100154503|ssc:100736584|ssc:100620994|ssc:100512581|ssc:100525148|ssc:100515267|ssc:397432|ssc:100155015|ssc:397523|ssc:100518636|	100520187|100154503|100736584|100620994|100512581|100525148|100515267|397432|100155015|397523|100518636|	|SRC, c-Src| | |LPAR1|PLCB3|PDGFC|HTR2A, 5-HT2A|ITPR3|GNAI2, GBI2|GJA1, CX43|	http://www.genome.jp/kegg-bin/show_pathway?ssc04540/ssc:100525148%09red/ssc:100155015%09red/ssc:100512581%09red/ssc:100518636%09red/ssc:397432%09red/ssc:100515267%09red/ssc:100154503%09red/ssc:397523%09red/ssc:100736584%09red/ssc:100520187%09red/ssc:100620994%09red
Protein processing in endoplasmic reticulum	KEGG PATHWAY	ssc04141	19	162	0.38655	1	ENSSSCG00000008208|ENSSSCG00000027057|ENSSSCG00000005384|ENSSSCG00000001701|ENSSSCG00000026374|ENSSSCG00000017279|ENSSSCG00000015106|ENSSSCG00000004244|ENSSSCG00000010380|ENSSSCG00000004700|ENSSSCG00000013784|ENSSSCG00000025181|ENSSSCG00000011000|ENSSSCG00000010260|ENSSSCG00000009888|ENSSSCG00000021005|ENSSSCG00000024692|ENSSSCG00000001516|ENSSSCG00000009142	ssc:100513348|ssc:100514334|ssc:100511362|ssc:396742|ssc:396580|ssc:100510978|ssc:100516870|ssc:396919|ssc:396610|ssc:100156204|ssc:396741|ssc:100523731|ssc:100512008|ssc:595115|ssc:100156625|ssc:100622592|ssc:100154945|ssc:397543|ssc:100622653|	100513348|100514334|100511362|396742|396580|100510978|100516870|396919|396610|100156204|396741|100523731|100512008|595115|100156625|100622592|100154945|397543|100622653|	EIF2AK3|SYVN1|SEC61B|HSPCB|UBCH5B|ERN1|HYOU1|MAN1A1, MAN1A|MAPK8, JNK, JNK1|PDIA3, grp-58|DNAJB1, HSPF1| |DNAJA1|SAR1A|ERP29|UBQLN1|RRBP1|BAK, Bak1|SEC24B|	http://www.genome.jp/kegg-bin/show_pathway?ssc04141/ssc:100154945%09red/ssc:100516870%09red/ssc:100622653%09red/ssc:100510978%09red/ssc:396919%09red/ssc:595115%09red/ssc:100523731%09red/ssc:100622592%09red/ssc:100513348%09red/ssc:397543%09red/ssc:100511362%09red/ssc:396742%09red/ssc:100512008%09red/ssc:396610%09red/ssc:396741%09red/ssc:396580%09red/ssc:100156204%09red/ssc:100156625%09red/ssc:1005…
Proteasome	KEGG PATHWAY	ssc03050	6	46	0.387998	1	ENSSSCG00000020769|ENSSSCG00000028872|ENSSSCG00000002006|ENSSSCG00000001951|ENSSSCG00000002036|ENSSSCG00000008412	ssc:100620420|ssc:100153464|ssc:397572|ssc:100156790|ssc:100155139|ssc:100517820|	100620420|100153464|397572|100156790|100155139|100517820|	PSMA2|PSMB8|PSME1|PSMA6| |PSME4|	http://www.genome.jp/kegg-bin/show_pathway?ssc03050/ssc:100156790%09red/ssc:100153464%09red/ssc:100517820%09red/ssc:397572%09red/ssc:100620420%09red/ssc:100155139%09red
Pertussis	KEGG PATHWAY	ssc05133	9	73	0.395518	1	ENSSSCG00000010380|ENSSSCG00000012981|ENSSSCG00000022080|ENSSSCG00000000293|ENSSSCG00000015662|ENSSSCG00000024771|ENSSSCG00000028711|ENSSSCG00000011251|ENSSSCG00000011399	ssc:396610|ssc:100135665|ssc:396849|ssc:100155091|ssc:100520761|ssc:100623776|ssc:397319|ssc:396646|ssc:397523|	396610|100135665|396849|100155091|100520761|100623776|397319|396646|397523|	MAPK8, JNK, JNK1|RELA|RHOA|ITGA5| | |CASP1|MYD88|GNAI2, GBI2|	http://www.genome.jp/kegg-bin/show_pathway?ssc05133/ssc:100623776%09red/ssc:100520761%09red/ssc:396610%09red/ssc:100135665%09red/ssc:397319%09red/ssc:396849%09red/ssc:396646%09red/ssc:397523%09red/ssc:100155091%09red
TNF signaling pathway	KEGG PATHWAY	ssc04668	13	109	0.397773	1	ENSSSCG00000010380|ENSSSCG00000012981|ENSSSCG00000003395|ENSSSCG00000002525|ENSSSCG00000030066|ENSSSCG00000012203|ENSSSCG00000010548|ENSSSCG00000004110|ENSSSCG00000017723|ENSSSCG00000028806|ENSSSCG00000008977|ENSSSCG00000001952|ENSSSCG00000026940	ssc:396610|ssc:100135665|ssc:100518131|ssc:100156979|ssc:397422|ssc:100517796|ssc:100135662|ssc:100156182|ssc:397422|ssc:100626270|ssc:494019|ssc:406188|ssc:100154896|	396610|100135665|100518131|100156979|397422|100517796|100135662|100156182|397422|100626270|494019|406188|100154896|	MAPK8, JNK, JNK1|RELA|PIK3CD|TRAF3, TRAF3_TV1|CCL2, MCP-1|TAB3|CHUK, IKK-alpha|TAB2|CCL2, MCP-1|RPS6KA4|CXCL10|NFKBIA, ECI-6/IKBA, IKBA|CASP10|	http://www.genome.jp/kegg-bin/show_pathway?ssc04668/ssc:100518131%09red/ssc:100626270%09red/ssc:100154896%09red/ssc:100156182%09red/ssc:397422%09red/ssc:494019%09red/ssc:396610%09red/ssc:100135665%09red/ssc:100135662%09red/ssc:100517796%09red/ssc:406188%09red/ssc:100156979%09red
Axon guidance	KEGG PATHWAY	ssc04360	14	119	0.408929	1	ENSSSCG00000011843|ENSSSCG00000006495|ENSSSCG00000022080|ENSSSCG00000028968|ENSSSCG00000011842|ENSSSCG00000026412|ENSSSCG00000029815|ENSSSCG00000004421|ENSSSCG00000026795|ENSSSCG00000000907|ENSSSCG00000010301|ENSSSCG00000011399|ENSSSCG00000015645|ENSSSCG00000011102	ssc:100511837|ssc:100157147|ssc:396849|ssc:100627149|ssc:100525766|ssc:100620331|ssc:100623414|ssc:791125|ssc:100518625|ssc:100519487|ssc:396603|ssc:397523|ssc:100518625|ssc:100286859|	100511837|100157147|396849|100627149|100525766|100620331|100623414|791125|100518625|100519487|396603|397523|100518625|100286859|	PAK2|SEMA4A|RHOA|RAC1|PAK1|PLXNA3|SRGAP1|FYN, PKC|SRGAP2|PLXNC1|PPP3CB|GNAI2, GBI2|SRGAP2|NRP1|	http://www.genome.jp/kegg-bin/show_pathway?ssc04360/ssc:100620331%09red/ssc:100511837%09red/ssc:791125%09red/ssc:100627149%09red/ssc:396603%09red/ssc:100623414%09red/ssc:100157147%09red/ssc:100286859%09red/ssc:100519487%09red/ssc:396849%09red/ssc:100525766%09red/ssc:397523%09red/ssc:100518625%09red
Leukocyte transendothelial migration	KEGG PATHWAY	ssc04670	14	119	0.408929	1	ENSSSCG00000017277|ENSSSCG00000022080|ENSSSCG00000028968|ENSSSCG00000014339|ENSSSCG00000013174|ENSSSCG00000003107|ENSSSCG00000007585|ENSSSCG00000015122|ENSSSCG00000009664|ENSSSCG00000021349|ENSSSCG00000011399|ENSSSCG00000003395|ENSSSCG00000010313|ENSSSCG00000028355	ssc:396941|ssc:396849|ssc:100627149|ssc:100523778|ssc:100519699|ssc:100514580|ssc:414396|ssc:100271931|ssc:100157507|ssc:396974|ssc:397523|ssc:100518131|ssc:396974|ssc:397653|	396941|396849|100627149|100523778|100519699|100514580|414396|100271931|100157507|396974|397523|100518131|396974|397653|	PECAM1, CD31, PECAM-1|RHOA|RAC1|CTNNA1|CTNND1| |ACTB|THY1, CD90|PTK2B|VCL|GNAI2, GBI2|PIK3CD|VCL|ACTB|	http://www.genome.jp/kegg-bin/show_pathway?ssc04670/ssc:396974%09red/ssc:100518131%09red/ssc:397523%09red/ssc:100627149%09red/ssc:100271931%09red/ssc:396941%09red/ssc:100514580%09red/ssc:414396%09red/ssc:100519699%09red/ssc:397653%09red/ssc:100157507%09red/ssc:396849%09red/ssc:100523778%09red
Pyrimidine metabolism	KEGG PATHWAY	ssc00240	12	101	0.409768	1	ENSSSCG00000010981|ENSSSCG00000025233|ENSSSCG00000022912|ENSSSCG00000022880|ENSSSCG00000025298|ENSSSCG00000008399|ENSSSCG00000003973|ENSSSCG00000028278|ENSSSCG00000005478|ENSSSCG00000007970|ENSSSCG00000008017|ENSSSCG00000008647	ssc:397577|ssc:100642182|ssc:100623678|ssc:100642182|ssc:100626323|ssc:100642182|ssc:100525292|ssc:100737040|ssc:100517450|ssc:100521261|ssc:100514398|ssc:100623872|	397577|100642182|100623678|100642182|100626323|100642182|100525292|100737040|100517450|100521261|100514398|100623872|	NUDT2|PNPT1|NT5C3A|PNPT1| |PNPT1|CTPS1|POLR2A|POLE3|POLR3K|NME3|CMPK2|	http://www.genome.jp/kegg-bin/show_pathway?ssc00240/ssc:100737040%09red/ssc:100623678%09red/ssc:100514398%09red/ssc:100642182%09red/ssc:100525292%09red/ssc:100517450%09red/ssc:100521261%09red/ssc:100626323%09red/ssc:397577%09red/ssc:100623872%09red
Glycosaminoglycan biosynthesis - chondroitin sulfate / dermatan sulfate	KEGG PATHWAY	ssc00532	3	21	0.412936	1	ENSSSCG00000007872|ENSSSCG00000004771|ENSSSCG00000023662	ssc:100514160|ssc:100520059|ssc:100151968|	100514160|100520059|100151968|	XYLT1|CHST14|CHST3|	http://www.genome.jp/kegg-bin/show_pathway?ssc00532/ssc:100151968%09red/ssc:100514160%09red/ssc:100520059%09red
Non-homologous end-joining	KEGG PATHWAY	ssc03450	2	13	0.432622	1	ENSSSCG00000010505|ENSSSCG00000000059	ssc:100518694|ssc:100154200|	100518694|100154200|	DNTT|XRCC6|	http://www.genome.jp/kegg-bin/show_pathway?ssc03450/ssc:100518694%09red/ssc:100154200%09red
Prolactin signaling pathway	KEGG PATHWAY	ssc04917	8	67	0.439349	1	ENSSSCG00000010380|ENSSSCG00000012981|ENSSSCG00000003395|ENSSSCG00000007334|ENSSSCG00000017403|ENSSSCG00000027855|ENSSSCG00000008478|ENSSSCG00000016057	ssc:396610|ssc:100135665|ssc:100518131|ssc:100154503|ssc:733648|ssc:100307052|ssc:100520187|ssc:396655|	396610|100135665|100518131|100154503|733648|100307052|100520187|396655|	MAPK8, JNK, JNK1|RELA|PIK3CD|SRC, c-Src|STAT3|SOCS1| |STAT1|	http://www.genome.jp/kegg-bin/show_pathway?ssc04917/ssc:100518131%09red/ssc:733648%09red/ssc:396610%09red/ssc:100307052%09red/ssc:100135665%09red/ssc:100154503%09red/ssc:396655%09red/ssc:100520187%09red
Vitamin digestion and absorption	KEGG PATHWAY	ssc04977	3	22	0.439566	1	ENSSSCG00000013116|ENSSSCG00000008550|ENSSSCG00000025848	ssc:100514273|ssc:100522014|ssc:100513159|	100514273|100522014|100513159|	GIF|SLC5A6|MMACHC|	http://www.genome.jp/kegg-bin/show_pathway?ssc04977/ssc:100522014%09red/ssc:100514273%09red/ssc:100513159%09red
Butirosin and neomycin biosynthesis	KEGG PATHWAY	ssc00524	1	5	0.456373	1	ENSSSCG00000008261	ssc:494561|	494561|	HK2|	http://www.genome.jp/kegg-bin/show_pathway?ssc00524/ssc:494561%09red
Parkinson's disease	KEGG PATHWAY	ssc05012	17	151	0.457576	1	ENSSSCG00000023379|ENSSSCG00000018080|ENSSSCG00000010128|ENSSSCG00000023277|ENSSSCG00000003506|ENSSSCG00000029091|ENSSSCG00000014371|ENSSSCG00000016714|ENSSSCG00000010795|ENSSSCG00000014145|ENSSSCG00000008466|ENSSSCG00000007026|ENSSSCG00000013596|ENSSSCG00000018094|ENSSSCG00000011399|ENSSSCG00000011356|ENSSSCG00000003385	ssc:100514753|ssc:808505|ssc:100156312|ssc:100515069|ssc:100515613|ssc:100513283|ssc:100520950|ssc:100170131|ssc:100312976|ssc:100037990|ssc:100516606|ssc:397651|ssc:100517634|ssc:808513|ssc:397523|ssc:100156879|ssc:780404|	100514753|808505|100156312|100515069|100515613|100513283|100520950|100170131|100312976|100037990|100516606|397651|100517634|808513|397523|100156879|780404|	UBE2L6|ATP8|SEPT5|NDUFA1|PINK1|APAF1|NDUFA2|CYCS, CYC|NDUFAB1|COX7C, COX7C1| |VDAC1P5, VDAC3, VDAC5P|NDUFA7|CYTB|GNAI2, GBI2| |PARK7|	http://www.genome.jp/kegg-bin/show_pathway?ssc05012/ssc:100515069%09red/ssc:780404%09red/ssc:100312976%09red/ssc:100037990%09red/ssc:397651%09red/ssc:100170131%09red/ssc:808505%09red/ssc:100517634%09red/ssc:100515613%09red/ssc:808513%09red/ssc:100156879%09red/ssc:100514753%09red/ssc:100516606%09red/ssc:100156312%09red/ssc:397523%09red/ssc:100520950%09red/ssc:100513283%09red
Glutathione metabolism	KEGG PATHWAY	ssc00480	6	50	0.458963	1	ENSSSCG00000001849|ENSSSCG00000024052|ENSSSCG00000010610|ENSSSCG00000003867|ENSSSCG00000001852|ENSSSCG00000006325	ssc:397520|ssc:399537|ssc:397117|ssc:100517534|ssc:397603|ssc:733607|	397520|399537|397117|100517534|397603|733607|	ANPEP, APN, PEPN|GPX4, PHGPx|GSTO1, GSTO_1-1, SPG-R| |IDH2|MGST3|	http://www.genome.jp/kegg-bin/show_pathway?ssc00480/ssc:100517534%09red/ssc:397603%09red/ssc:733607%09red/ssc:397117%09red/ssc:397520%09red/ssc:399537%09red
Fatty acid degradation	KEGG PATHWAY	ssc00071	5	41	0.461325	1	ENSSSCG00000020972|ENSSSCG00000008571|ENSSSCG00000006324|ENSSSCG00000009185|ENSSSCG00000010790	ssc:100520636|ssc:397012|ssc:100153809|ssc:100513555|ssc:100156927|	100520636|397012|100153809|100513555|100156927|	|HADHA|ALDH9A1|ADH5|ECHS1|	http://www.genome.jp/kegg-bin/show_pathway?ssc00071/ssc:100153809%09red/ssc:100520636%09red/ssc:100156927%09red/ssc:100513555%09red/ssc:397012%09red
Insulin signaling pathway	KEGG PATHWAY	ssc04910	15	133	0.462322	1	ENSSSCG00000010380|ENSSSCG00000008478|ENSSSCG00000012275|ENSSSCG00000013033|ENSSSCG00000027855|ENSSSCG00000003395|ENSSSCG00000008439|ENSSSCG00000015115|ENSSSCG00000005169|ENSSSCG00000003413|ENSSSCG00000022486|ENSSSCG00000011363|ENSSSCG00000008261|ENSSSCG00000006703|ENSSSCG00000013564	ssc:396610|ssc:100520187|ssc:397601|ssc:100521065|ssc:100307052|ssc:100518131|ssc:100523840|ssc:100518854|ssc:100038023|ssc:100127359|ssc:100621690|ssc:397493|ssc:494561|ssc:100157793|ssc:396755|	396610|100520187|397601|100521065|100307052|100518131|100523840|100518854|100038023|100127359|100621690|397493|494561|100157793|396755|	MAPK8, JNK, JNK1| |ARAF, ARAF1|BAD|SOCS1|PIK3CD|RHOQ|CBL|RPS6|MTOR, FRAP1|CBLB|PRKAR2A|HK2|PRKAB2|INSR|	http://www.genome.jp/kegg-bin/show_pathway?ssc04910/ssc:396755%09red/ssc:100518131%09red/ssc:100523840%09red/ssc:397601%09red/ssc:396610%09red/ssc:100038023%09red/ssc:100307052%09red/ssc:100520187%09red/ssc:100518854%09red/ssc:397493%09red/ssc:100127359%09red/ssc:100157793%09red/ssc:494561%09red/ssc:100521065%09red/ssc:100621690%09red
FoxO signaling pathway	KEGG PATHWAY	ssc04068	15	133	0.462322	1	ENSSSCG00000010380|ENSSSCG00000010235|ENSSSCG00000016832|ENSSSCG00000017403|ENSSSCG00000010548|ENSSSCG00000012275|ENSSSCG00000023368|ENSSSCG00000003395|ENSSSCG00000012399|ENSSSCG00000008478|ENSSSCG00000020906|ENSSSCG00000000068|ENSSSCG00000029876|ENSSSCG00000006703|ENSSSCG00000013564	ssc:396610|ssc:751859|ssc:100271930|ssc:733648|ssc:100135662|ssc:397601|ssc:100517317|ssc:100518131|ssc:733705|ssc:100520187|ssc:406191|ssc:100156226|ssc:100154319|ssc:100157793|ssc:396755|	396610|751859|100271930|733648|100135662|397601|100517317|100518131|733705|100520187|406191|100156226|100154319|100157793|396755|	MAPK8, JNK, JNK1|SIRT1|IL7R, CD127|STAT3|CHUK, IKK-alpha|ARAF, ARAF1| |PIK3CD|FOXO4, MLLT7| |TNFSF10, TRAIL|EP300|SOD2|PRKAB2|INSR|	http://www.genome.jp/kegg-bin/show_pathway?ssc04068/ssc:396755%09red/ssc:100518131%09red/ssc:397601%09red/ssc:733648%09red/ssc:396610%09red/ssc:100271930%09red/ssc:406191%09red/ssc:100154319%09red/ssc:733705%09red/ssc:100156226%09red/ssc:100135662%09red/ssc:100157793%09red/ssc:100520187%09red/ssc:751859%09red/ssc:100517317%09red
Pancreatic secretion	KEGG PATHWAY	ssc04972	10	87	0.463508	1	ENSSSCG00000028069|ENSSSCG00000022080|ENSSSCG00000028968|ENSSSCG00000027344|ENSSSCG00000008742|ENSSSCG00000003497|ENSSSCG00000006740|ENSSSCG00000021707|ENSSSCG00000000555|ENSSSCG00000013034	ssc:733701|ssc:396849|ssc:100627149|ssc:396875|ssc:100511702|ssc:100512662|ssc:397481|ssc:100620994|ssc:100155015|ssc:100525148|	733701|396849|100627149|396875|100511702|100512662|397481|100620994|100155015|100525148|	ATP2B4, PMCA4|RHOA|RAC1|ATP2A2, ATP2, SERCA2|CD38|PLA2G2D|ATP1A1| |ITPR3|PLCB3|	http://www.genome.jp/kegg-bin/show_pathway?ssc04972/ssc:100525148%09red/ssc:100155015%09red/ssc:100512662%09red/ssc:733701%09red/ssc:100511702%09red/ssc:396849%09red/ssc:396875%09red/ssc:100627149%09red/ssc:100620994%09red/ssc:397481%09red
Rheumatoid arthritis	KEGG PATHWAY	ssc05323	10	87	0.463508	1	ENSSSCG00000030066|ENSSSCG00000008056|ENSSSCG00000017700|ENSSSCG00000017723|ENSSSCG00000017401|ENSSSCG00000009003|ENSSSCG00000009002|ENSSSCG00000009542|ENSSSCG00000005491|ENSSSCG00000006054	ssc:397422|ssc:100518959|ssc:494459|ssc:397422|ssc:100523018|ssc:396623|ssc:396623|ssc:100038026|ssc:100154379|ssc:100154942|	397422|100518959|494459|397422|100523018|396623|396623|100038026|100154379|100154942|	CCL2, MCP-1|ATP6V0C|CCL3L1|CCL2, MCP-1|ATP6V0A1|TLR2|TLR2|TNFSF13B, BAFF|ATP6V1G1|ATP6V1C1|	http://www.genome.jp/kegg-bin/show_pathway?ssc05323/ssc:100154942%09red/ssc:397422%09red/ssc:100038026%09red/ssc:100523018%09red/ssc:494459%09red/ssc:396623%09red/ssc:100518959%09red/ssc:100154379%09red
Linoleic acid metabolism	KEGG PATHWAY	ssc00591	4	32	0.463662	1	ENSSSCG00000023320|ENSSSCG00000010491|ENSSSCG00000026798|ENSSSCG00000003497	ssc:100144468|ssc:403111|ssc:403111|ssc:100512662|	100144468|403111|403111|100512662|	CYP3A22|CYP2C42|CYP2C42|PLA2G2D|	http://www.genome.jp/kegg-bin/show_pathway?ssc00591/ssc:100512662%09red/ssc:403111%09red/ssc:100144468%09red
Base excision repair	KEGG PATHWAY	ssc03410	4	32	0.463662	1	ENSSSCG00000005478|ENSSSCG00000024221|ENSSSCG00000022957|ENSSSCG00000023033	ssc:100517450|ssc:100153912|ssc:100738726|ssc:100620838|	100517450|100153912|100738726|100620838|	POLE3|SMUG1| |PARP3|	http://www.genome.jp/kegg-bin/show_pathway?ssc03410/ssc:100153912%09red/ssc:100738726%09red/ssc:100517450%09red/ssc:100620838%09red
Glyoxylate and dicarboxylate metabolism	KEGG PATHWAY	ssc00630	3	23	0.465717	1	ENSSSCG00000023807|ENSSSCG00000005349|ENSSSCG00000004846	ssc:100628006|ssc:100154014|ssc:100037986|	100628006|100154014|100037986|	ACO1|GRHPR|MCEE|	http://www.genome.jp/kegg-bin/show_pathway?ssc00630/ssc:100154014%09red/ssc:100037986%09red/ssc:100628006%09red
Chemical carcinogenesis	KEGG PATHWAY	ssc05204	7	60	0.472742	1	ENSSSCG00000010610|ENSSSCG00000016308|ENSSSCG00000010491|ENSSSCG00000023320|ENSSSCG00000006325|ENSSSCG00000009185|ENSSSCG00000026798	ssc:397117|ssc:100511479|ssc:403111|ssc:100144468|ssc:733607|ssc:100513555|ssc:403111|	397117|100511479|403111|100144468|733607|100513555|403111|	GSTO1, GSTO_1-1, SPG-R|UGT1A3, UGT1A1|CYP2C42|CYP3A22|MGST3|ADH5|CYP2C42|	http://www.genome.jp/kegg-bin/show_pathway?ssc05204/ssc:403111%09red/ssc:100511479%09red/ssc:397117%09red/ssc:733607%09red/ssc:100144468%09red/ssc:100513555%09red
Oxidative phosphorylation	KEGG PATHWAY	ssc00190	15	134	0.473076	1	ENSSSCG00000018080|ENSSSCG00000023277|ENSSSCG00000010261|ENSSSCG00000017401|ENSSSCG00000014371|ENSSSCG00000010795|ENSSSCG00000014145|ENSSSCG00000008466|ENSSSCG00000008056|ENSSSCG00000013596|ENSSSCG00000023903|ENSSSCG00000018094|ENSSSCG00000011356|ENSSSCG00000005491|ENSSSCG00000006054	ssc:808505|ssc:100515069|ssc:100155201|ssc:100523018|ssc:100520950|ssc:100312976|ssc:100037990|ssc:100516606|ssc:100518959|ssc:100517634|ssc:396950|ssc:808513|ssc:100156879|ssc:100154379|ssc:100154942|	808505|100515069|100155201|100523018|100520950|100312976|100037990|100516606|100518959|100517634|396950|808513|100156879|100154379|100154942|	ATP8|NDUFA1|PPA1|ATP6V0A1|NDUFA2|NDUFAB1|COX7C, COX7C1| |ATP6V0C|NDUFA7|ATP5I|CYTB| |ATP6V1G1|ATP6V1C1|	http://www.genome.jp/kegg-bin/show_pathway?ssc00190/ssc:396950%09red/ssc:100515069%09red/ssc:808513%09red/ssc:100312976%09red/ssc:100037990%09red/ssc:100517634%09red/ssc:100154942%09red/ssc:100523018%09red/ssc:100156879%09red/ssc:100516606%09red/ssc:100155201%09red/ssc:100520950%09red/ssc:100518959%09red/ssc:808505%09red/ssc:100154379%09red
Ubiquitin mediated proteolysis	KEGG PATHWAY	ssc04120	15	134	0.473076	1	ENSSSCG00000027057|ENSSSCG00000023379|ENSSSCG00000008513|ENSSSCG00000015509|ENSSSCG00000006544|ENSSSCG00000003111|ENSSSCG00000012328|ENSSSCG00000027855|ENSSSCG00000026374|ENSSSCG00000009814|ENSSSCG00000015115|ENSSSCG00000022486|ENSSSCG00000022101|ENSSSCG00000006689|ENSSSCG00000001912	ssc:100514334|ssc:100514753|ssc:100049694|ssc:100520856|ssc:100156747|ssc:100515263|ssc:100517442|ssc:100307052|ssc:396580|ssc:100152087|ssc:100518854|ssc:100621690|ssc:100049662|ssc:100511878|ssc:100157336|	100514334|100514753|100049694|100520856|100156747|100515263|100517442|100307052|396580|100152087|100518854|100621690|100049662|100511878|100157336|	SYVN1|UBE2L6| |RFWD2|UBE2Q1|SAE1|HUWE1|SOCS1|UBCH5B|ANAPC5|CBL|CBLB|BRCA1|PIAS3|PML|	http://www.genome.jp/kegg-bin/show_pathway?ssc04120/ssc:100152087%09red/ssc:100049694%09red/ssc:100514753%09red/ssc:100621690%09red/ssc:100049662%09red/ssc:100520856%09red/ssc:100157336%09red/ssc:100307052%09red/ssc:100156747%09red/ssc:100518854%09red/ssc:100517442%09red/ssc:100515263%09red/ssc:100511878%09red/ssc:396580%09red/ssc:100514334%09red
Estrogen signaling pathway	KEGG PATHWAY	ssc04915	11	97	0.473492	1	ENSSSCG00000003395|ENSSSCG00000007334|ENSSSCG00000021707|ENSSSCG00000001549|ENSSSCG00000001701|ENSSSCG00000027558|ENSSSCG00000008478|ENSSSCG00000013034|ENSSSCG00000000555|ENSSSCG00000011399|ENSSSCG00000023503	ssc:100518131|ssc:100154503|ssc:100620994|ssc:100155423|ssc:396742|ssc:100511175|ssc:100520187|ssc:100525148|ssc:100155015|ssc:397523|ssc:100622955|	100518131|100154503|100620994|100155423|396742|100511175|100520187|100525148|100155015|397523|100622955|	PIK3CD|SRC, c-Src| |FKBP5|HSPCB|GABBR2| |PLCB3|ITPR3|GNAI2, GBI2|PRKCD|	http://www.genome.jp/kegg-bin/show_pathway?ssc04915/ssc:100518131%09red/ssc:100525148%09red/ssc:100154503%09red/ssc:397523%09red/ssc:100511175%09red/ssc:396742%09red/ssc:100622955%09red/ssc:100155423%09red/ssc:100520187%09red/ssc:100620994%09red/ssc:100155015%09red
Phosphatidylinositol signaling system	KEGG PATHWAY	ssc04070	9	79	0.480366	1	ENSSSCG00000003395|ENSSSCG00000027340|ENSSSCG00000016147|ENSSSCG00000010092|ENSSSCG00000000555|ENSSSCG00000022550|ENSSSCG00000012035|ENSSSCG00000016050|ENSSSCG00000013034	ssc:100518131|ssc:100623115|ssc:100521692|ssc:100157143|ssc:100155015|ssc:100623595|ssc:100525664|ssc:100514878|ssc:100525148|	100518131|100623115|100521692|100157143|100155015|100623595|100525664|100514878|100525148|	PIK3CD|PI4K2B|PIKFYVE|PI4KA|ITPR3|DGKG|SYNJ1|INPP1|PLCB3|	http://www.genome.jp/kegg-bin/show_pathway?ssc04070/ssc:100514878%09red/ssc:100623595%09red/ssc:100525664%09red/ssc:100157143%09red/ssc:100525148%09red/ssc:100623115%09red/ssc:100521692%09red/ssc:100518131%09red/ssc:100155015%09red
Carbohydrate digestion and absorption	KEGG PATHWAY	ssc04973	5	42	0.480596	1	ENSSSCG00000028277|ENSSSCG00000003395|ENSSSCG00000008261|ENSSSCG00000015105|ENSSSCG00000006740	ssc:100522672|ssc:100518131|ssc:494561|ssc:100516688|ssc:397481|	100522672|100518131|494561|100516688|397481|	|PIK3CD|HK2|SLC37A4|ATP1A1|	http://www.genome.jp/kegg-bin/show_pathway?ssc04973/ssc:100518131%09red/ssc:100516688%09red/ssc:494561%09red/ssc:100522672%09red/ssc:397481%09red
Amoebiasis	KEGG PATHWAY	ssc05146	12	107	0.482476	1	ENSSSCG00000012981|ENSSSCG00000022307|ENSSSCG00000010313|ENSSSCG00000016034|ENSSSCG00000003395|ENSSSCG00000015618|ENSSSCG00000009003|ENSSSCG00000009002|ENSSSCG00000021349|ENSSSCG00000013034|ENSSSCG00000009544|ENSSSCG00000009545	ssc:100135665|ssc:100627693|ssc:396974|ssc:100152001|ssc:100518131|ssc:100513489|ssc:396623|ssc:396623|ssc:396974|ssc:100525148|ssc:100515336|ssc:100153454|	100135665|100627693|396974|100152001|100518131|100513489|396623|396623|396974|100525148|100515336|100153454|	RELA| |VCL|COL3A1|PIK3CD|LAMB3|TLR2|TLR2|VCL|PLCB3|COL4A1|COL4A2|	http://www.genome.jp/kegg-bin/show_pathway?ssc05146/ssc:100627693%09red/ssc:100518131%09red/ssc:100515336%09red/ssc:100513489%09red/ssc:100135665%09red/ssc:100525148%09red/ssc:396623%09red/ssc:100153454%09red/ssc:396974%09red/ssc:100152001%09red
Glycosaminoglycan biosynthesis - heparan sulfate / heparin	KEGG PATHWAY	ssc00534	3	24	0.491312	1	ENSSSCG00000007872|ENSSSCG00000013281|ENSSSCG00000009680	ssc:100514160|ssc:100522362|ssc:100152703|	100514160|100522362|100152703|	XYLT1|EXT2|EXTL3|	http://www.genome.jp/kegg-bin/show_pathway?ssc00534/ssc:100152703%09red/ssc:100514160%09red/ssc:100522362%09red
AMPK signaling pathway	KEGG PATHWAY	ssc04152	13	118	0.502117	1	ENSSSCG00000010235|ENSSSCG00000003395|ENSSSCG00000010554|ENSSSCG00000008774|ENSSSCG00000009657|ENSSSCG00000015660|ENSSSCG00000013592|ENSSSCG00000003413|ENSSSCG00000024413|ENSSSCG00000007839|ENSSSCG00000005514|ENSSSCG00000006703|ENSSSCG00000013564	ssc:751859|ssc:100518131|ssc:396670|ssc:100524447|ssc:397090|ssc:100523270|ssc:100337681|ssc:100127359|ssc:397088|ssc:100523723|ssc:595112|ssc:100157793|ssc:396755|	751859|100518131|396670|100524447|397090|100523270|100337681|100127359|397088|100523723|595112|100157793|396755|	SIRT1|PIK3CD|SCD| |PPP2R2A|PFKFB2|ELAVL1|MTOR, FRAP1|PPP2R1A|EEF2K|RAB14|PRKAB2|INSR|	http://www.genome.jp/kegg-bin/show_pathway?ssc04152/ssc:100518131%09red/ssc:397088%09red/ssc:100127359%09red/ssc:100523723%09red/ssc:751859%09red/ssc:100337681%09red/ssc:397090%09red/ssc:595112%09red/ssc:100157793%09red/ssc:100523270%09red/ssc:396670%09red/ssc:100524447%09red/ssc:396755%09red
Inflammatory bowel disease (IBD)	KEGG PATHWAY	ssc05321	7	62	0.504528	1	ENSSSCG00000012981|ENSSSCG00000017403|ENSSSCG00000014278|ENSSSCG00000009003|ENSSSCG00000009002|ENSSSCG00000016057|ENSSSCG00000012397	ssc:100135665|ssc:733648|ssc:397409|ssc:396623|ssc:396623|ssc:396655|ssc:397156|	100135665|733648|397409|396623|396623|396655|397156|	RELA|STAT3|IL-5, IL5|TLR2|TLR2|STAT1|IL2RG|	http://www.genome.jp/kegg-bin/show_pathway?ssc05321/ssc:397156%09red/ssc:733648%09red/ssc:100135665%09red/ssc:396623%09red/ssc:396655%09red/ssc:397409%09red
Porphyrin and chlorophyll metabolism	KEGG PATHWAY	ssc00860	4	34	0.506844	1	ENSSSCG00000012347|ENSSSCG00000026759|ENSSSCG00000016308|ENSSSCG00000003922	ssc:100518817|ssc:445512|ssc:100511479|ssc:100514239|	100518817|445512|100511479|100514239|	ALAS2|HMOX1, HSP32|UGT1A3, UGT1A1|UROD|	http://www.genome.jp/kegg-bin/show_pathway?ssc00860/ssc:445512%09red/ssc:100514239%09red/ssc:100518817%09red/ssc:100511479%09red
Transcriptional misregulation in cancer	KEGG PATHWAY	ssc05202	17	156	0.507755	1	ENSSSCG00000012981|ENSSSCG00000005965|ENSSSCG00000023593|ENSSSCG00000016729|ENSSSCG00000028829|ENSSSCG00000012051|ENSSSCG00000002282|ENSSSCG00000024152|ENSSSCG00000023324|ENSSSCG00000013307|ENSSSCG00000001880|ENSSSCG00000016999|ENSSSCG00000006678|ENSSSCG00000008388|ENSSSCG00000001912|ENSSSCG00000017202|ENSSSCG00000001561	ssc:100135665|ssc:448810|ssc:100627910|ssc:448812|ssc:100154511|ssc:100512633|ssc:100517170|ssc:100157726|ssc:100623006|ssc:100512825|ssc:100621221|ssc:100525967|ssc:613130|ssc:100525104|ssc:100157336|ssc:396970|ssc:100156210|	100135665|448810|100627910|448812|100154511|100512633|100517170|100157726|100623006|100512825|100621221|100525967|613130|100525104|100157336|396970|100156210|	RELA|MYC|AFF1|IGFBP3, IGFBP-3|HIST1H3E|RUNX1|MAX|ETV6|KMT2A, MLL|LMO2|SIN3A|TLX3|FCGR1A|REL|PML|H3F3A|ETV7|	http://www.genome.jp/kegg-bin/show_pathway?ssc05202/ssc:448810%09red/ssc:448812%09red/ssc:100157726%09red/ssc:100512825%09red/ssc:100135665%09red/ssc:100623006%09red/ssc:100157336%09red/ssc:100525967%09red/ssc:100525104%09red/ssc:613130%09red/ssc:100154511%09red/ssc:100517170%09red/ssc:396970%09red/ssc:100156210%09red/ssc:100512633%09red/ssc:100627910%09red/ssc:100621221%09red
Phenylalanine, tyrosine and tryptophan biosynthesis	KEGG PATHWAY	ssc00400	1	6	0.50889	1	ENSSSCG00000003192	ssc:100522257|	100522257|	IL4I1|	http://www.genome.jp/kegg-bin/show_pathway?ssc00400/ssc:100522257%09red
Nicotinate and nicotinamide metabolism	KEGG PATHWAY	ssc00760	3	25	0.516285	1	ENSSSCG00000022912|ENSSSCG00000008742|ENSSSCG00000015054	ssc:100623678|ssc:100511702|ssc:100144485|	100623678|100511702|100144485|	NT5C3A|CD38|NNMT|	http://www.genome.jp/kegg-bin/show_pathway?ssc00760/ssc:100144485%09red/ssc:100623678%09red/ssc:100511702%09red
Inflammatory mediator regulation of TRP channels	KEGG PATHWAY	ssc04750	12	110	0.518236	1	ENSSSCG00000010380|ENSSSCG00000003395|ENSSSCG00000009123|ENSSSCG00000021707|ENSSSCG00000010491|ENSSSCG00000005095|ENSSSCG00000013034|ENSSSCG00000009406|ENSSSCG00000000555|ENSSSCG00000023503|ENSSSCG00000026798|ENSSSCG00000007334	ssc:396610|ssc:100518131|ssc:397674|ssc:100620994|ssc:403111|ssc:100152637|ssc:100525148|ssc:397432|ssc:100155015|ssc:100622955|ssc:403111|ssc:100154503|	396610|100518131|397674|100620994|403111|100152637|100525148|397432|100155015|100622955|403111|100154503|	MAPK8, JNK, JNK1|PIK3CD|CAMK2D| |CYP2C42|PKC|PLCB3|HTR2A, 5-HT2A|ITPR3|PRKCD|CYP2C42|SRC, c-Src|	http://www.genome.jp/kegg-bin/show_pathway?ssc04750/ssc:100518131%09red/ssc:100525148%09red/ssc:403111%09red/ssc:100152637%09red/ssc:396610%09red/ssc:397432%09red/ssc:100154503%09red/ssc:397674%09red/ssc:100622955%09red/ssc:100620994%09red/ssc:100155015%09red
p53 signaling pathway	KEGG PATHWAY	ssc04115	8	73	0.528262	1	ENSSSCG00000029438|ENSSSCG00000015509|ENSSSCG00000016729|ENSSSCG00000029091|ENSSSCG00000016714|ENSSSCG00000000769|ENSSSCG00000011357|ENSSSCG00000026454	ssc:100620966|ssc:100520856|ssc:448812|ssc:100513283|ssc:100170131|ssc:594852|ssc:100154430|ssc:397278|	100620966|100520856|448812|100513283|100170131|594852|100154430|397278|	SESN2|RFWD2|IGFBP3, IGFBP-3|APAF1|CYCS, CYC|BID| |PMAIP1, TN3|	http://www.genome.jp/kegg-bin/show_pathway?ssc04115/ssc:100513283%09red/ssc:448812%09red/ssc:100170131%09red/ssc:100520856%09red/ssc:100154430%09red/ssc:100620966%09red/ssc:397278%09red/ssc:594852%09red
PI3K-Akt signaling pathway	KEGG PATHWAY	ssc04151	35	328	0.530633	1	ENSSSCG00000024960|ENSSSCG00000028968|ENSSSCG00000009657|ENSSSCG00000004896|ENSSSCG00000024413|ENSSSCG00000013564|ENSSSCG00000012397|ENSSSCG00000009002|ENSSSCG00000016832|ENSSSCG00000005965|ENSSSCG00000013647|ENSSSCG00000005457|ENSSSCG00000010548|ENSSSCG00000025026|ENSSSCG00000003413|ENSSSCG00000022101|ENSSSCG00000015618|ENSSSCG00000006161|ENSSSCG00000003140|ENSSSCG00000013033|ENSSSCG00000016034|…	ssc:100515267|ssc:100627149|ssc:397090|ssc:100154633|ssc:397088|ssc:396755|ssc:397156|ssc:396623|ssc:100271930|ssc:448810|ssc:100141402|ssc:100512581|ssc:100135662|ssc:100739353|ssc:100127359|ssc:100049662|ssc:100513489|ssc:397253|ssc:100302504|ssc:100521065|ssc:100152001|ssc:100038023|ssc:100519398|ssc:100738399|ssc:397643|ssc:100515336|ssc:100153454|ssc:100135665|ssc:100518131|ssc:396742|ssc:10…	100515267|100627149|397090|100154633|397088|396755|397156|396623|100271930|448810|100141402|100512581|100135662|100739353|100127359|100049662|100513489|397253|100302504|100521065|100152001|100038023|100519398|100738399|397643|100515336|100153454|100135665|100518131|396742|100155165|100155091|399522|396623|100520187|	PDGFC|RAC1|PPP2R2A|PHLPP1|PPP2R1A|INSR|IL2RG|TLR2|IL7R, CD127|MYC|CDC37|LPAR1|CHUK, IKK-alpha| |MTOR, FRAP1|BRCA1|LAMB3|IL7, IL-7|FGF21|BAD|COL3A1|RPS6|OSMR|LPAR6|FGF2|COL4A1|COL4A2|RELA|PIK3CD|HSPCB|PIK3AP1|ITGA5|IL6R, IL-6Ralpha|TLR2| |	http://www.genome.jp/kegg-bin/show_pathway?ssc04151/ssc:448810%09red/ssc:100519398%09red/ssc:100512581%09red/ssc:100739353%09red/ssc:397090%09red/ssc:100049662%09red/ssc:100515267%09red/ssc:100127359%09red/ssc:100141402%09red/ssc:100153454%09red/ssc:100302504%09red/ssc:100152001%09red/ssc:100271930%09red/ssc:100154633%09red/ssc:100513489%09red/ssc:100521065%09red/ssc:100627149%09red/ssc:396742%09…
Sphingolipid metabolism	KEGG PATHWAY	ssc00600	5	45	0.536831	1	ENSSSCG00000009594|ENSSSCG00000027146|ENSSSCG00000006522|ENSSSCG00000004408|ENSSSCG00000026955	ssc:100739638|ssc:100415928|ssc:449572|ssc:100152155|ssc:100155321|	100739638|100415928|449572|100152155|100155321|	SPTLC1| |GBA|SMPD2|ACER2|	http://www.genome.jp/kegg-bin/show_pathway?ssc00600/ssc:100415928%09red/ssc:100152155%09red/ssc:100155321%09red/ssc:449572%09red/ssc:100739638%09red
Fatty acid metabolism	KEGG PATHWAY	ssc01212	5	45	0.536831	1	ENSSSCG00000000031|ENSSSCG00000020972|ENSSSCG00000008571|ENSSSCG00000010554|ENSSSCG00000010790	ssc:100523602|ssc:100520636|ssc:397012|ssc:396670|ssc:100156927|	100523602|100520636|397012|396670|100156927|	MCAT| |HADHA|SCD|ECHS1|	http://www.genome.jp/kegg-bin/show_pathway?ssc01212/ssc:100523602%09red/ssc:396670%09red/ssc:100520636%09red/ssc:100156927%09red/ssc:397012%09red
Pentose and glucuronate interconversions	KEGG PATHWAY	ssc00040	3	26	0.540582	1	ENSSSCG00000004679|ENSSSCG00000011254|ENSSSCG00000016308	ssc:100158181|ssc:100628009|ssc:100511479|	100158181|100628009|100511479|	SORD|XYLB|UGT1A3, UGT1A1|	http://www.genome.jp/kegg-bin/show_pathway?ssc00040/ssc:100158181%09red/ssc:100628009%09red/ssc:100511479%09red
Thyroid cancer	KEGG PATHWAY	ssc05216	3	26	0.540582	1	ENSSSCG00000010638|ENSSSCG00000010211|ENSSSCG00000005965	ssc:100153922|ssc:100155896|ssc:448810|	100153922|100155896|448810|	TCF7L2|CCDC6|MYC|	http://www.genome.jp/kegg-bin/show_pathway?ssc05216/ssc:448810%09red/ssc:100155896%09red/ssc:100153922%09red
Biosynthesis of unsaturated fatty acids	KEGG PATHWAY	ssc01040	2	17	0.560039	1	ENSSSCG00000008571|ENSSSCG00000010554	ssc:397012|ssc:396670|	397012|396670|	HADHA|SCD|	http://www.genome.jp/kegg-bin/show_pathway?ssc01040/ssc:396670%09red/ssc:397012%09red
GnRH signaling pathway	KEGG PATHWAY	ssc04912	9	86	0.575262	1	ENSSSCG00000010380|ENSSSCG00000007334|ENSSSCG00000021707|ENSSSCG00000028887|ENSSSCG00000008478|ENSSSCG00000009664|ENSSSCG00000000555|ENSSSCG00000013034|ENSSSCG00000009123	ssc:396610|ssc:100154503|ssc:100620994|ssc:414900|ssc:100520187|ssc:100157507|ssc:100155015|ssc:100525148|ssc:397674|	396610|100154503|100620994|414900|100520187|100157507|100155015|100525148|397674|	MAPK8, JNK, JNK1|SRC, c-Src| |PLD2| |PTK2B|ITPR3|PLCB3|CAMK2D|	http://www.genome.jp/kegg-bin/show_pathway?ssc04912/ssc:100525148%09red/ssc:100155015%09red/ssc:396610%09red/ssc:414900%09red/ssc:100154503%09red/ssc:100157507%09red/ssc:397674%09red/ssc:100520187%09red/ssc:100620994%09red
Galactose metabolism	KEGG PATHWAY	ssc00052	3	28	0.586979	1	ENSSSCG00000010998|ENSSSCG00000027146|ENSSSCG00000008261	ssc:100511655|ssc:100415928|ssc:494561|	100511655|100415928|494561|	B4GALT1| |HK2|	http://www.genome.jp/kegg-bin/show_pathway?ssc00052/ssc:100415928%09red/ssc:494561%09red/ssc:100511655%09red
2-Oxocarboxylic acid metabolism	KEGG PATHWAY	ssc01210	2	18	0.58853	1	ENSSSCG00000023807|ENSSSCG00000001852	ssc:100628006|ssc:397603|	100628006|397603|	ACO1|IDH2|	http://www.genome.jp/kegg-bin/show_pathway?ssc01210/ssc:100628006%09red/ssc:397603%09red
Long-term depression	KEGG PATHWAY	ssc04730	6	59	0.608075	1	ENSSSCG00000012275|ENSSSCG00000013034|ENSSSCG00000024413|ENSSSCG00000011399|ENSSSCG00000000555|ENSSSCG00000006250	ssc:397601|ssc:100525148|ssc:397088|ssc:397523|ssc:100155015|ssc:100152890|	397601|100525148|397088|397523|100155015|100152890|	ARAF, ARAF1|PLCB3|PPP2R1A|GNAI2, GBI2|ITPR3|LYN|	http://www.genome.jp/kegg-bin/show_pathway?ssc04730/ssc:100525148%09red/ssc:100155015%09red/ssc:397088%09red/ssc:397601%09red/ssc:100152890%09red/ssc:397523%09red
Wnt signaling pathway	KEGG PATHWAY	ssc04310	13	128	0.612035	1	ENSSSCG00000010638|ENSSSCG00000010380|ENSSSCG00000009123|ENSSSCG00000022080|ENSSSCG00000028968|ENSSSCG00000014207|ENSSSCG00000025374|ENSSSCG00000013034|ENSSSCG00000024671|ENSSSCG00000000068|ENSSSCG00000010301|ENSSSCG00000001414|ENSSSCG00000005965	ssc:100153922|ssc:396610|ssc:397674|ssc:396849|ssc:100627149|ssc:100517932|ssc:100621038|ssc:100525148|ssc:100512949|ssc:100156226|ssc:396603|ssc:397211|ssc:448810|	100153922|396610|397674|396849|100627149|100517932|100621038|100525148|100512949|100156226|396603|397211|448810|	TCF7L2|MAPK8, JNK, JNK1|CAMK2D|RHOA|RAC1|APC, APC1|DVL3|PLCB3|WNT9A|EP300|PPP3CB|CSNK2B, CK2N, CKII_beta|MYC|	http://www.genome.jp/kegg-bin/show_pathway?ssc04310/ssc:448810%09red/ssc:100525148%09red/ssc:100512949%09red/ssc:397211%09red/ssc:396610%09red/ssc:396603%09red/ssc:100156226%09red/ssc:396849%09red/ssc:100621038%09red/ssc:100627149%09red/ssc:397674%09red/ssc:100153922%09red/ssc:100517932%09red
Hippo signaling pathway	KEGG PATHWAY	ssc04390	14	138	0.614699	1	ENSSSCG00000016113|ENSSSCG00000010638|ENSSSCG00000008941|ENSSSCG00000014339|ENSSSCG00000014207|ENSSSCG00000011313|ENSSSCG00000025374|ENSSSCG00000007585|ENSSSCG00000012591|ENSSSCG00000009657|ENSSSCG00000024413|ENSSSCG00000024671|ENSSSCG00000005965|ENSSSCG00000028355	ssc:100127483|ssc:100153922|ssc:100517174|ssc:100523778|ssc:100517932|ssc:100738579|ssc:100621038|ssc:414396|ssc:100158213|ssc:397090|ssc:397088|ssc:100512949|ssc:448810|ssc:397653|	100127483|100153922|100517174|100523778|100517932|100738579|100621038|414396|100158213|397090|397088|100512949|448810|397653|	BMPR2|TCF7L2|MOB1B|CTNNA1|APC, APC1|LIMD1|DVL3|ACTB|AMOT|PPP2R2A|PPP2R1A|WNT9A|MYC|ACTB|	http://www.genome.jp/kegg-bin/show_pathway?ssc04390/ssc:100127483%09red/ssc:448810%09red/ssc:397088%09red/ssc:100512949%09red/ssc:100158213%09red/ssc:414396%09red/ssc:397090%09red/ssc:100153922%09red/ssc:397653%09red/ssc:100621038%09red/ssc:100738579%09red/ssc:100517174%09red/ssc:100523778%09red/ssc:100517932%09red
Ubiquinone and other terpenoid-quinone biosynthesis	KEGG PATHWAY	ssc00130	1	9	0.637925	1	ENSSSCG00000009238	ssc:100526233|	100526233|	COQ2|	http://www.genome.jp/kegg-bin/show_pathway?ssc00130/ssc:100526233%09red
Fanconi anemia pathway	KEGG PATHWAY	ssc03460	5	51	0.639794	1	ENSSSCG00000024222|ENSSSCG00000023095|ENSSSCG00000022101|ENSSSCG00000020961|ENSSSCG00000008179	ssc:100337665|ssc:100622097|ssc:100049662|ssc:100153762|ssc:100522795|	100337665|100622097|100049662|100153762|100522795|	MLH1| |BRCA1|BRCA2|REV1|	http://www.genome.jp/kegg-bin/show_pathway?ssc03460/ssc:100522795%09red/ssc:100622097%09red/ssc:100049662%09red/ssc:100337665%09red/ssc:100153762%09red
Fatty acid elongation	KEGG PATHWAY	ssc00062	2	20	0.641327	1	ENSSSCG00000008571|ENSSSCG00000010790	ssc:397012|ssc:100156927|	397012|100156927|	HADHA|ECHS1|	http://www.genome.jp/kegg-bin/show_pathway?ssc00062/ssc:397012%09red/ssc:100156927%09red
Aldosterone-regulated sodium reabsorption	KEGG PATHWAY	ssc04960	4	41	0.64347	1	ENSSSCG00000003395|ENSSSCG00000008038|ENSSSCG00000006740|ENSSSCG00000013564	ssc:100518131|ssc:100192448|ssc:397481|ssc:396755|	100518131|100192448|397481|396755|	PIK3CD|SLC9A3R2|ATP1A1|INSR|	http://www.genome.jp/kegg-bin/show_pathway?ssc04960/ssc:100518131%09red/ssc:100192448%09red/ssc:396755%09red/ssc:397481%09red
cAMP signaling pathway	KEGG PATHWAY	ssc04024	20	201	0.654152	1	ENSSSCG00000004248|ENSSSCG00000013641|ENSSSCG00000028069|ENSSSCG00000027312|ENSSSCG00000010380|ENSSSCG00000009123|ENSSSCG00000022080|ENSSSCG00000021707|ENSSSCG00000013033|ENSSSCG00000011842|ENSSSCG00000028968|ENSSSCG00000003395|ENSSSCG00000027558|ENSSSCG00000001952|ENSSSCG00000006740|ENSSSCG00000011754|ENSSSCG00000012981|ENSSSCG00000000068|ENSSSCG00000011399|ENSSSCG00000028887	ssc:397421|ssc:396825|ssc:733701|ssc:100627504|ssc:396610|ssc:397674|ssc:396849|ssc:100620994|ssc:100521065|ssc:100525766|ssc:100627149|ssc:100518131|ssc:100511175|ssc:406188|ssc:397481|ssc:397372|ssc:100135665|ssc:100156226|ssc:397523|ssc:414900|	397421|396825|733701|100627504|396610|397674|396849|100620994|100521065|100525766|100627149|100518131|100511175|406188|397481|397372|100135665|100156226|397523|414900|	PLN|PDE4A|ATP2B4, PMCA4|PTCH1|MAPK8, JNK, JNK1|CAMK2D|RHOA| |BAD|PAK1|RAC1|PIK3CD|GABBR2|NFKBIA, ECI-6/IKBA, IKBA|ATP1A1|GHSR|RELA|EP300|GNAI2, GBI2|PLD2|	http://www.genome.jp/kegg-bin/show_pathway?ssc04024/ssc:100518131%09red/ssc:100525766%09red/ssc:396610%09red/ssc:100627149%09red/ssc:100156226%09red/ssc:406188%09red/ssc:397421%09red/ssc:733701%09red/ssc:100627504%09red/ssc:414900%09red/ssc:100135665%09red/ssc:396849%09red/ssc:396825%09red/ssc:397523%09red/ssc:100511175%09red/ssc:397674%09red/ssc:397372%09red/ssc:100620994%09red/ssc:100521065%09r…
Non-small cell lung cancer	KEGG PATHWAY	ssc05223	5	52	0.655503	1	ENSSSCG00000013033|ENSSSCG00000008478|ENSSSCG00000012275|ENSSSCG00000023368|ENSSSCG00000003395	ssc:100521065|ssc:100520187|ssc:397601|ssc:100517317|ssc:100518131|	100521065|100520187|397601|100517317|100518131|	BAD| |ARAF, ARAF1| |PIK3CD|	http://www.genome.jp/kegg-bin/show_pathway?ssc05223/ssc:100518131%09red/ssc:100520187%09red/ssc:397601%09red/ssc:100521065%09red/ssc:100517317%09red
Basal cell carcinoma	KEGG PATHWAY	ssc05217	5	52	0.655503	1	ENSSSCG00000010638|ENSSSCG00000014207|ENSSSCG00000027312|ENSSSCG00000025374|ENSSSCG00000024671	ssc:100153922|ssc:100517932|ssc:100627504|ssc:100621038|ssc:100512949|	100153922|100517932|100627504|100621038|100512949|	TCF7L2|APC, APC1|PTCH1|DVL3|WNT9A|	http://www.genome.jp/kegg-bin/show_pathway?ssc05217/ssc:100627504%09red/ssc:100512949%09red/ssc:100153922%09red/ssc:100517932%09red/ssc:100621038%09red
Biosynthesis of amino acids	KEGG PATHWAY	ssc01230	6	63	0.666557	1	ENSSSCG00000001852|ENSSSCG00000008207|ENSSSCG00000012440|ENSSSCG00000010855|ENSSSCG00000000694|ENSSSCG00000023807	ssc:397603|ssc:100038014|ssc:407608|ssc:100524702|ssc:396823|ssc:100628006|	397603|100038014|407608|100524702|396823|100628006|	IDH2|RPIA|PGK1|PYCR2|GAPDH, GAPD|ACO1|	http://www.genome.jp/kegg-bin/show_pathway?ssc01230/ssc:407608%09red/ssc:100038014%09red/ssc:397603%09red/ssc:100628006%09red/ssc:396823%09red/ssc:100524702%09red
TGF-beta signaling pathway	KEGG PATHWAY	ssc04350	7	74	0.676796	1	ENSSSCG00000016113|ENSSSCG00000022080|ENSSSCG00000024413|ENSSSCG00000009560|ENSSSCG00000000068|ENSSSCG00000021865|ENSSSCG00000005965	ssc:100127483|ssc:396849|ssc:397088|ssc:100621036|ssc:100156226|ssc:397093|ssc:448810|	100127483|396849|397088|100621036|100156226|397093|448810|	BMPR2|RHOA|PPP2R1A|TFDP1|EP300|INHBA|MYC|	http://www.genome.jp/kegg-bin/show_pathway?ssc04350/ssc:100127483%09red/ssc:448810%09red/ssc:397088%09red/ssc:397093%09red/ssc:100156226%09red/ssc:396849%09red/ssc:100621036%09red
Melanogenesis	KEGG PATHWAY	ssc04916	9	95	0.684311	1	ENSSSCG00000010638|ENSSSCG00000009123|ENSSSCG00000021707|ENSSSCG00000009477|ENSSSCG00000025374|ENSSSCG00000013034|ENSSSCG00000024671|ENSSSCG00000000068|ENSSSCG00000011399	ssc:100153922|ssc:397674|ssc:100620994|ssc:414911|ssc:100621038|ssc:100525148|ssc:100512949|ssc:100156226|ssc:397523|	100153922|397674|100620994|414911|100621038|100525148|100512949|100156226|397523|	TCF7L2|CAMK2D| |EDNRB, ETB|DVL3|PLCB3|WNT9A|EP300|GNAI2, GBI2|	http://www.genome.jp/kegg-bin/show_pathway?ssc04916/ssc:100525148%09red/ssc:100512949%09red/ssc:414911%09red/ssc:100620994%09red/ssc:100156226%09red/ssc:100621038%09red/ssc:397523%09red/ssc:397674%09red/ssc:100153922%09red
Hematopoietic cell lineage	KEGG PATHWAY	ssc04640	8	85	0.686344	1	ENSSSCG00000016832|ENSSSCG00000001849|ENSSSCG00000000293|ENSSSCG00000010505|ENSSSCG00000014278|ENSSSCG00000027628|ENSSSCG00000006678|ENSSSCG00000006161	ssc:100271930|ssc:397520|ssc:100155091|ssc:100518694|ssc:397409|ssc:399522|ssc:613130|ssc:397253|	100271930|397520|100155091|100518694|397409|399522|613130|397253|	IL7R, CD127|ANPEP, APN, PEPN|ITGA5|DNTT|IL-5, IL5|IL6R, IL-6Ralpha|FCGR1A|IL7, IL-7|	http://www.genome.jp/kegg-bin/show_pathway?ssc04640/ssc:397253%09red/ssc:100271930%09red/ssc:100518694%09red/ssc:613130%09red/ssc:397520%09red/ssc:100155091%09red/ssc:399522%09red/ssc:397409%09red
Ascorbate and aldarate metabolism	KEGG PATHWAY	ssc00053	2	22	0.688626	1	ENSSSCG00000006324|ENSSSCG00000016308	ssc:100153809|ssc:100511479|	100153809|100511479|	ALDH9A1|UGT1A3, UGT1A1|	http://www.genome.jp/kegg-bin/show_pathway?ssc00053/ssc:100153809%09red/ssc:100511479%09red
Salivary secretion	KEGG PATHWAY	ssc04970	7	75	0.68932	1	ENSSSCG00000028069|ENSSSCG00000021707|ENSSSCG00000008742|ENSSSCG00000013034|ENSSSCG00000006740|ENSSSCG00000007139|ENSSSCG00000000555	ssc:733701|ssc:100620994|ssc:100511702|ssc:100525148|ssc:397481|ssc:552898|ssc:100155015|	733701|100620994|100511702|100525148|397481|552898|100155015|	ATP2B4, PMCA4| |CD38|PLCB3|ATP1A1|ADRA1D|ITPR3|	http://www.genome.jp/kegg-bin/show_pathway?ssc04970/ssc:100525148%09red/ssc:100155015%09red/ssc:733701%09red/ssc:100511702%09red/ssc:552898%09red/ssc:100620994%09red/ssc:397481%09red
cGMP-PKG signaling pathway	KEGG PATHWAY	ssc04022	16	167	0.699238	1	ENSSSCG00000004248|ENSSSCG00000003395|ENSSSCG00000028069|ENSSSCG00000022080|ENSSSCG00000021707|ENSSSCG00000013033|ENSSSCG00000027344|ENSSSCG00000009477|ENSSSCG00000013034|ENSSSCG00000006740|ENSSSCG00000007139|ENSSSCG00000010301|ENSSSCG00000000555|ENSSSCG00000011399|ENSSSCG00000007026|ENSSSCG00000013564	ssc:397421|ssc:100518131|ssc:733701|ssc:396849|ssc:100620994|ssc:100521065|ssc:396875|ssc:414911|ssc:100525148|ssc:397481|ssc:552898|ssc:396603|ssc:100155015|ssc:397523|ssc:397651|ssc:396755|	397421|100518131|733701|396849|100620994|100521065|396875|414911|100525148|397481|552898|396603|100155015|397523|397651|396755|	PLN|PIK3CD|ATP2B4, PMCA4|RHOA| |BAD|ATP2A2, ATP2, SERCA2|EDNRB, ETB|PLCB3|ATP1A1|ADRA1D|PPP3CB|ITPR3|GNAI2, GBI2|VDAC1P5, VDAC3, VDAC5P|INSR|	http://www.genome.jp/kegg-bin/show_pathway?ssc04022/ssc:100518131%09red/ssc:100525148%09red/ssc:397651%09red/ssc:414911%09red/ssc:733701%09red/ssc:396603%09red/ssc:100155015%09red/ssc:552898%09red/ssc:396875%09red/ssc:397523%09red/ssc:397421%09red/ssc:396849%09red/ssc:396755%09red/ssc:100620994%09red/ssc:100521065%09red/ssc:397481%09red
Arginine and proline metabolism	KEGG PATHWAY	ssc00330	5	55	0.699923	1	ENSSSCG00000006324|ENSSSCG00000023107|ENSSSCG00000002541|ENSSSCG00000010855|ENSSSCG00000010734	ssc:100153809|ssc:100152781|ssc:397645|ssc:100524702|ssc:100156865|	100153809|100152781|397645|100524702|100156865|	ALDH9A1|SMOX|SAT1, SAT|PYCR2|OAT|	http://www.genome.jp/kegg-bin/show_pathway?ssc00330/ssc:100152781%09red/ssc:100524702%09red/ssc:100156865%09red/ssc:397645%09red/ssc:100153809%09red
RNA polymerase	KEGG PATHWAY	ssc03020	3	34	0.707032	1	ENSSSCG00000025298|ENSSSCG00000007970|ENSSSCG00000028278	ssc:100626323|ssc:100521261|ssc:100737040|	100626323|100521261|100737040|	|POLR3K|POLR2A|	http://www.genome.jp/kegg-bin/show_pathway?ssc03020/ssc:100521261%09red/ssc:100737040%09red/ssc:100626323%09red
African trypanosomiasis	KEGG PATHWAY	ssc05143	3	34	0.707032	1	ENSSSCG00000011251|ENSSSCG00000007007|ENSSSCG00000013034	ssc:396646|ssc:100519877|ssc:100525148|	396646|100519877|100525148|	MYD88|IDO1, IDO|PLCB3|	http://www.genome.jp/kegg-bin/show_pathway?ssc05143/ssc:100525148%09red/ssc:100519877%09red/ssc:396646%09red
Rap1 signaling pathway	KEGG PATHWAY	ssc04015	20	208	0.70786	1	ENSSSCG00000003395|ENSSSCG00000024960|ENSSSCG00000002332|ENSSSCG00000030156|ENSSSCG00000022080|ENSSSCG00000021707|ENSSSCG00000017006|ENSSSCG00000005457|ENSSSCG00000013174|ENSSSCG00000008881|ENSSSCG00000009086|ENSSSCG00000013034|ENSSSCG00000007585|ENSSSCG00000028968|ENSSSCG00000003140|ENSSSCG00000013564|ENSSSCG00000011399|ENSSSCG00000005738|ENSSSCG00000028355|ENSSSCG00000007334	ssc:100518131|ssc:100515267|ssc:100157762|ssc:100514179|ssc:396849|ssc:100620994|ssc:100511843|ssc:100512581|ssc:100519699|ssc:100517409|ssc:397643|ssc:100525148|ssc:414396|ssc:100627149|ssc:100302504|ssc:396755|ssc:397523|ssc:100513970|ssc:397653|ssc:100154503|	100518131|100515267|100157762|100514179|396849|100620994|100511843|100512581|100519699|100517409|397643|100525148|414396|100627149|100302504|396755|397523|100513970|397653|100154503|	PIK3CD|PDGFC|SIPA1L1|APBB1IP|RHOA| |LCP2|LPAR1|CTNND1|RAPGEF2|FGF2|PLCB3|ACTB|RAC1|FGF21|INSR|GNAI2, GBI2|RALGDS|ACTB|SRC, c-Src|	http://www.genome.jp/kegg-bin/show_pathway?ssc04015/ssc:100514179%09red/ssc:100518131%09red/ssc:100512581%09red/ssc:100627149%09red/ssc:414396%09red/ssc:100517409%09red/ssc:100513970%09red/ssc:100515267%09red/ssc:100302504%09red/ssc:100525148%09red/ssc:100519699%09red/ssc:397643%09red/ssc:397653%09red/ssc:100154503%09red/ssc:397523%09red/ssc:396849%09red/ssc:100157762%09red/ssc:396755%09red/ssc:1…
Butanoate metabolism	KEGG PATHWAY	ssc00650	2	23	0.710283	1	ENSSSCG00000008571|ENSSSCG00000010790	ssc:397012|ssc:100156927|	397012|100156927|	HADHA|ECHS1|	http://www.genome.jp/kegg-bin/show_pathway?ssc00650/ssc:397012%09red/ssc:100156927%09red
Neurotrophin signaling pathway	KEGG PATHWAY	ssc04722	11	118	0.711721	1	ENSSSCG00000010380|ENSSSCG00000012981|ENSSSCG00000003395|ENSSSCG00000009123|ENSSSCG00000022080|ENSSSCG00000028968|ENSSSCG00000013033|ENSSSCG00000009833|ENSSSCG00000001952|ENSSSCG00000008478|ENSSSCG00000023503	ssc:396610|ssc:100135665|ssc:100518131|ssc:397674|ssc:396849|ssc:100627149|ssc:100521065|ssc:100154922|ssc:406188|ssc:100520187|ssc:100622955|	396610|100135665|100518131|397674|396849|100627149|100521065|100154922|406188|100520187|100622955|	MAPK8, JNK, JNK1|RELA|PIK3CD|CAMK2D|RHOA|RAC1|BAD|SH2B3|NFKBIA, ECI-6/IKBA, IKBA| |PRKCD|	http://www.genome.jp/kegg-bin/show_pathway?ssc04722/ssc:100518131%09red/ssc:396610%09red/ssc:406188%09red/ssc:100154922%09red/ssc:100135665%09red/ssc:396849%09red/ssc:100627149%09red/ssc:397674%09red/ssc:100622955%09red/ssc:100520187%09red/ssc:100521065%09red
Arrhythmogenic right ventricular cardiomyopathy (ARVC)	KEGG PATHWAY	ssc05412	6	67	0.7192	1	ENSSSCG00000010638|ENSSSCG00000014339|ENSSSCG00000004241|ENSSSCG00000000293|ENSSSCG00000007585|ENSSSCG00000028355	ssc:100153922|ssc:100523778|ssc:100518636|ssc:100155091|ssc:414396|ssc:397653|	100153922|100523778|100518636|100155091|414396|397653|	TCF7L2|CTNNA1|GJA1, CX43|ITGA5|ACTB|ACTB|	http://www.genome.jp/kegg-bin/show_pathway?ssc05412/ssc:414396%09red/ssc:100518636%09red/ssc:100153922%09red/ssc:397653%09red/ssc:100155091%09red/ssc:100523778%09red
Bladder cancer	KEGG PATHWAY	ssc05219	3	35	0.724191	1	ENSSSCG00000026279|ENSSSCG00000012275|ENSSSCG00000005965	ssc:100155578|ssc:397601|ssc:448810|	100155578|397601|448810|	DAPK2|ARAF, ARAF1|MYC|	http://www.genome.jp/kegg-bin/show_pathway?ssc05219/ssc:448810%09red/ssc:100155578%09red/ssc:397601%09red
Long-term potentiation	KEGG PATHWAY	ssc04720	6	68	0.731415	1	ENSSSCG00000009123|ENSSSCG00000012275|ENSSSCG00000013034|ENSSSCG00000000555|ENSSSCG00000000068|ENSSSCG00000010301	ssc:397674|ssc:397601|ssc:100525148|ssc:100155015|ssc:100156226|ssc:396603|	397674|397601|100525148|100155015|100156226|396603|	CAMK2D|ARAF, ARAF1|PLCB3|ITPR3|EP300|PPP3CB|	http://www.genome.jp/kegg-bin/show_pathway?ssc04720/ssc:100525148%09red/ssc:100155015%09red/ssc:397601%09red/ssc:396603%09red/ssc:100156226%09red/ssc:397674%09red
VEGF signaling pathway	KEGG PATHWAY	ssc04370	5	58	0.74021	1	ENSSSCG00000013033|ENSSSCG00000010301|ENSSSCG00000003395|ENSSSCG00000007334|ENSSSCG00000028968	ssc:100521065|ssc:396603|ssc:100518131|ssc:100154503|ssc:100627149|	100521065|396603|100518131|100154503|100627149|	BAD|PPP3CB|PIK3CD|SRC, c-Src|RAC1|	http://www.genome.jp/kegg-bin/show_pathway?ssc04370/ssc:100518131%09red/ssc:100154503%09red/ssc:396603%09red/ssc:100627149%09red/ssc:100521065%09red
Glycine, serine and threonine metabolism	KEGG PATHWAY	ssc00260	3	36	0.740554	1	ENSSSCG00000012347|ENSSSCG00000005349|ENSSSCG00000015443	ssc:100518817|ssc:100154014|ssc:397129|	100518817|100154014|397129|	ALAS2|GRHPR|DLD, DLDH|	http://www.genome.jp/kegg-bin/show_pathway?ssc00260/ssc:397129%09red/ssc:100154014%09red/ssc:100518817%09red
SNARE interactions in vesicular transport	KEGG PATHWAY	ssc04130	3	36	0.740554	1	ENSSSCG00000005386|ENSSSCG00000013752|ENSSSCG00000030183	ssc:100157063|ssc:100627609|ssc:100519332|	100157063|100627609|100519332|	STX17|STX10|GOSR2|	http://www.genome.jp/kegg-bin/show_pathway?ssc04130/ssc:100157063%09red/ssc:100519332%09red/ssc:100627609%09red
Cytokine-cytokine receptor interaction	KEGG PATHWAY	ssc04060	21	223	0.742667	1	ENSSSCG00000016113|ENSSSCG00000030066|ENSSSCG00000016832|ENSSSCG00000006161|ENSSSCG00000030906|ENSSSCG00000017700|ENSSSCG00000017723|ENSSSCG00000011318|ENSSSCG00000017721|ENSSSCG00000020667|ENSSSCG00000014278|ENSSSCG00000027628|ENSSSCG00000025026|ENSSSCG00000016851|ENSSSCG00000012397|ENSSSCG00000008978|ENSSSCG00000020906|ENSSSCG00000008977|ENSSSCG00000026707|ENSSSCG00000009542|ENSSSCG00000000765	ssc:100127483|ssc:397422|ssc:100271930|ssc:397253|ssc:100626347|ssc:494459|ssc:397422|ssc:414376|ssc:100302703|ssc:100520680|ssc:397409|ssc:399522|ssc:100739353|ssc:100519398|ssc:397156|ssc:100169744|ssc:406191|ssc:494019|ssc:414375|ssc:100038026|ssc:100518910|	100127483|397422|100271930|397253|100626347|494459|397422|414376|100302703|100520680|397409|399522|100739353|100519398|397156|100169744|406191|494019|414375|100038026|100518910|	BMPR2|CCL2, MCP-1|IL7R, CD127|IL7, IL-7|MPL|CCL3L1|CCL2, MCP-1|CXCR6|CCL8| |IL-5, IL5|IL6R, IL-6Ralpha| |OSMR|IL2RG|CXCL11|TNFSF10, TRAIL|CXCL10|XCR1|TNFSF13B, BAFF|IL-17R, IL17RA|	http://www.genome.jp/kegg-bin/show_pathway?ssc04060/ssc:100127483%09red/ssc:100519398%09red/ssc:100520680%09red/ssc:100739353%09red/ssc:397156%09red/ssc:100518910%09red/ssc:100302703%09red/ssc:414375%09red/ssc:406191%09red/ssc:494019%09red/ssc:399522%09red/ssc:100038026%09red/ssc:397253%09red/ssc:494459%09red/ssc:100169744%09red/ssc:100271930%09red/ssc:100626347%09red/ssc:414376%09red/ssc:397422%…
Melanoma	KEGG PATHWAY	ssc05218	6	69	0.743249	1	ENSSSCG00000003395|ENSSSCG00000024960|ENSSSCG00000013033|ENSSSCG00000012275|ENSSSCG00000009086|ENSSSCG00000003140	ssc:100518131|ssc:100515267|ssc:100521065|ssc:397601|ssc:397643|ssc:100302504|	100518131|100515267|100521065|397601|397643|100302504|	PIK3CD|PDGFC|BAD|ARAF, ARAF1|FGF2|FGF21|	http://www.genome.jp/kegg-bin/show_pathway?ssc05218/ssc:100518131%09red/ssc:397601%09red/ssc:100515267%09red/ssc:397643%09red/ssc:100302504%09red/ssc:100521065%09red
Bile secretion	KEGG PATHWAY	ssc04976	6	69	0.743249	1	ENSSSCG00000030900|ENSSSCG00000028512|ENSSSCG00000021707|ENSSSCG00000006740|ENSSSCG00000017561|ENSSSCG00000026635	ssc:396801|ssc:396801|ssc:100620994|ssc:397481|ssc:100513231|ssc:397404|	396801|396801|100620994|397481|100513231|397404|	LDLR|LDLR| |ATP1A1|ABCC3|SLC2A1, GLUT1|	http://www.genome.jp/kegg-bin/show_pathway?ssc04976/ssc:396801%09red/ssc:397404%09red/ssc:100620994%09red/ssc:100513231%09red/ssc:397481%09red
Peroxisome	KEGG PATHWAY	ssc04146	7	80	0.747133	1	ENSSSCG00000003914|ENSSSCG00000012779|ENSSSCG00000001852|ENSSSCG00000002013|ENSSSCG00000028431|ENSSSCG00000002362|ENSSSCG00000029876	ssc:100512476|ssc:100519529|ssc:397603|ssc:397082|ssc:397574|ssc:100152503|ssc:100154319|	100512476|100519529|397603|397082|397574|100152503|100154319|	PRDX1|ABCD1|IDH2|DHRS4, PSCD|HSD17B4| |SOD2|	http://www.genome.jp/kegg-bin/show_pathway?ssc04146/ssc:397603%09red/ssc:397082%09red/ssc:100154319%09red/ssc:100512476%09red/ssc:100519529%09red/ssc:100152503%09red/ssc:397574%09red
Protein export	KEGG PATHWAY	ssc03060	2	25	0.749812	1	ENSSSCG00000017191|ENSSSCG00000005384	ssc:100739290|ssc:100511362|	100739290|100511362|	SRP68|SEC61B|	http://www.genome.jp/kegg-bin/show_pathway?ssc03060/ssc:100511362%09red/ssc:100739290%09red
Cysteine and methionine metabolism	KEGG PATHWAY	ssc00270	3	37	0.756134	1	ENSSSCG00000000576|ENSSSCG00000003192|ENSSSCG00000007278	ssc:100621540|ssc:100522257|ssc:497050|	100621540|100522257|497050|	LDHB, LDH-B, LDH-H|IL4I1|AHCY|	http://www.genome.jp/kegg-bin/show_pathway?ssc00270/ssc:100522257%09red/ssc:497050%09red/ssc:100621540%09red
Fatty acid biosynthesis	KEGG PATHWAY	ssc00061	1	13	0.758861	1	ENSSSCG00000000031	ssc:100523602|	100523602|	MCAT|	http://www.genome.jp/kegg-bin/show_pathway?ssc00061/ssc:100523602%09red
Riboflavin metabolism	KEGG PATHWAY	ssc00740	1	13	0.758861	1	ENSSSCG00000006697	ssc:100156584|	100156584|	ACP6|	http://www.genome.jp/kegg-bin/show_pathway?ssc00740/ssc:100156584%09red
Folate biosynthesis	KEGG PATHWAY	ssc00790	1	13	0.758861	1	ENSSSCG00000001596	ssc:100154835|	100154835|	MOCS1|	http://www.genome.jp/kegg-bin/show_pathway?ssc00790/ssc:100154835%09red
Starch and sucrose metabolism	KEGG PATHWAY	ssc00500	4	49	0.765873	1	ENSSSCG00000028277|ENSSSCG00000029384|ENSSSCG00000008261|ENSSSCG00000016308	ssc:100522672|ssc:100516938|ssc:494561|ssc:100511479|	100522672|100516938|494561|100511479|	| |HK2|UGT1A3, UGT1A1|	http://www.genome.jp/kegg-bin/show_pathway?ssc00500/ssc:494561%09red/ssc:100522672%09red/ssc:100511479%09red/ssc:100516938%09red
Amino sugar and nucleotide sugar metabolism	KEGG PATHWAY	ssc00520	4	49	0.765873	1	ENSSSCG00000014393|ENSSSCG00000008261|ENSSSCG00000008316|ENSSSCG00000011389	ssc:100512094|ssc:494561|ssc:100523729|ssc:100513376|	100512094|494561|100523729|100513376|	GNPDA1|HK2|NAGK|GMPPB|	http://www.genome.jp/kegg-bin/show_pathway?ssc00520/ssc:494561%09red/ssc:100523729%09red/ssc:100513376%09red/ssc:100512094%09red
Drug metabolism - cytochrome P450	KEGG PATHWAY	ssc00982	4	49	0.765873	1	ENSSSCG00000010610|ENSSSCG00000006325|ENSSSCG00000009185|ENSSSCG00000016308	ssc:397117|ssc:733607|ssc:100513555|ssc:100511479|	397117|733607|100513555|100511479|	GSTO1, GSTO_1-1, SPG-R|MGST3|ADH5|UGT1A3, UGT1A1|	http://www.genome.jp/kegg-bin/show_pathway?ssc00982/ssc:397117%09red/ssc:733607%09red/ssc:100511479%09red/ssc:100513555%09red
Metabolism of xenobiotics by cytochrome P450	KEGG PATHWAY	ssc00980	4	49	0.765873	1	ENSSSCG00000010610|ENSSSCG00000006325|ENSSSCG00000009185|ENSSSCG00000016308	ssc:397117|ssc:733607|ssc:100513555|ssc:100511479|	397117|733607|100513555|100511479|	GSTO1, GSTO_1-1, SPG-R|MGST3|ADH5|UGT1A3, UGT1A1|	http://www.genome.jp/kegg-bin/show_pathway?ssc00980/ssc:397117%09red/ssc:733607%09red/ssc:100511479%09red/ssc:100513555%09red
Glycosphingolipid biosynthesis - lacto and neolacto series	KEGG PATHWAY	ssc00601	2	26	0.767775	1	ENSSSCG00000010998|ENSSSCG00000024393	ssc:100511655|ssc:397599|	100511655|397599|	B4GALT1|B3GNT5|	http://www.genome.jp/kegg-bin/show_pathway?ssc00601/ssc:397599%09red/ssc:100511655%09red
Allograft rejection	KEGG PATHWAY	ssc05330	3	38	0.77095	1	ENSSSCG00000024161|ENSSSCG00000014278|ENSSSCG00000001341	ssc:396650|ssc:397409|ssc:100135031|	396650|397409|100135031|	SLA-7|IL-5, IL5|SLA-2, SLA-B|	http://www.genome.jp/kegg-bin/show_pathway?ssc05330/ssc:396650%09red/ssc:100135031%09red/ssc:397409%09red
Glioma	KEGG PATHWAY	ssc05214	5	61	0.776376	1	ENSSSCG00000012275|ENSSSCG00000003395|ENSSSCG00000008478|ENSSSCG00000003413|ENSSSCG00000009123	ssc:397601|ssc:100518131|ssc:100520187|ssc:100127359|ssc:397674|	397601|100518131|100520187|100127359|397674|	ARAF, ARAF1|PIK3CD| |MTOR, FRAP1|CAMK2D|	http://www.genome.jp/kegg-bin/show_pathway?ssc05214/ssc:100518131%09red/ssc:397674%09red/ssc:100520187%09red/ssc:397601%09red/ssc:100127359%09red
Ribosome biogenesis in eukaryotes	KEGG PATHWAY	ssc03008	7	83	0.777937	1	ENSSSCG00000000058|ENSSSCG00000004328|ENSSSCG00000007855|ENSSSCG00000016809|ENSSSCG00000022864|ENSSSCG00000001414|ENSSSCG00000004847	ssc:100155420|ssc:100525725|ssc:100512042|ssc:100524961|ssc:100627301|ssc:397211|ssc:100153310|	100155420|100525725|100512042|100524961|100627301|397211|100153310|	NHP2L1|MDN1| |DROSHA|EIF6|CSNK2B, CK2N, CKII_beta|MPHOSPH10|	http://www.genome.jp/kegg-bin/show_pathway?ssc03008/ssc:100512042%09red/ssc:397211%09red/ssc:100627301%09red/ssc:100153310%09red/ssc:100155420%09red/ssc:100524961%09red/ssc:100525725%09red
Steroid hormone biosynthesis	KEGG PATHWAY	ssc00140	4	51	0.790728	1	ENSSSCG00000023320|ENSSSCG00000010491|ENSSSCG00000026798|ENSSSCG00000016308	ssc:100144468|ssc:403111|ssc:403111|ssc:100511479|	100144468|403111|403111|100511479|	CYP3A22|CYP2C42|CYP2C42|UGT1A3, UGT1A1|	http://www.genome.jp/kegg-bin/show_pathway?ssc00140/ssc:100511479%09red/ssc:100144468%09red/ssc:403111%09red
Ovarian steroidogenesis	KEGG PATHWAY	ssc04913	4	51	0.790728	1	ENSSSCG00000030900|ENSSSCG00000028512|ENSSSCG00000013564|ENSSSCG00000021707	ssc:396801|ssc:396801|ssc:396755|ssc:100620994|	396801|396801|396755|100620994|	LDLR|LDLR|INSR| |	http://www.genome.jp/kegg-bin/show_pathway?ssc04913/ssc:396801%09red/ssc:396755%09red/ssc:100620994%09red
Autoimmune thyroid disease	KEGG PATHWAY	ssc05320	4	51	0.790728	1	ENSSSCG00000024161|ENSSSCG00000025026|ENSSSCG00000014278|ENSSSCG00000001341	ssc:396650|ssc:100739353|ssc:397409|ssc:100135031|	396650|100739353|397409|100135031|	SLA-7| |IL-5, IL5|SLA-2, SLA-B|	http://www.genome.jp/kegg-bin/show_pathway?ssc05320/ssc:396650%09red/ssc:100135031%09red/ssc:100739353%09red/ssc:397409%09red
Vascular smooth muscle contraction	KEGG PATHWAY	ssc04270	10	117	0.794223	1	ENSSSCG00000012275|ENSSSCG00000022080|ENSSSCG00000021707|ENSSSCG00000005095|ENSSSCG00000013034|ENSSSCG00000003497|ENSSSCG00000023503|ENSSSCG00000007139|ENSSSCG00000000555|ENSSSCG00000006461	ssc:397601|ssc:396849|ssc:100620994|ssc:100152637|ssc:100525148|ssc:100512662|ssc:100622955|ssc:552898|ssc:100155015|ssc:100157291|	397601|396849|100620994|100152637|100525148|100512662|100622955|552898|100155015|100157291|	ARAF, ARAF1|RHOA| |PKC|PLCB3|PLA2G2D|PRKCD|ADRA1D|ITPR3|ARHGEF11|	http://www.genome.jp/kegg-bin/show_pathway?ssc04270/ssc:100525148%09red/ssc:100155015%09red/ssc:100157291%09red/ssc:397601%09red/ssc:100152637%09red/ssc:100512662%09red/ssc:552898%09red/ssc:396849%09red/ssc:100622955%09red/ssc:100620994%09red
Gastric acid secretion	KEGG PATHWAY	ssc04971	6	74	0.79677	1	ENSSSCG00000009123|ENSSSCG00000021707|ENSSSCG00000013034|ENSSSCG00000006740|ENSSSCG00000011399|ENSSSCG00000000555	ssc:397674|ssc:100620994|ssc:100525148|ssc:397481|ssc:397523|ssc:100155015|	397674|100620994|100525148|397481|397523|100155015|	CAMK2D| |PLCB3|ATP1A1|GNAI2, GBI2|ITPR3|	http://www.genome.jp/kegg-bin/show_pathway?ssc04971/ssc:100525148%09red/ssc:100155015%09red/ssc:397523%09red/ssc:397674%09red/ssc:100620994%09red/ssc:397481%09red
Progesterone-mediated oocyte maturation	KEGG PATHWAY	ssc04914	7	85	0.796873	1	ENSSSCG00000010380|ENSSSCG00000003395|ENSSSCG00000021707|ENSSSCG00000012275|ENSSSCG00000009814|ENSSSCG00000011399|ENSSSCG00000001701	ssc:396610|ssc:100518131|ssc:100620994|ssc:397601|ssc:100152087|ssc:397523|ssc:396742|	396610|100518131|100620994|397601|100152087|397523|396742|	MAPK8, JNK, JNK1|PIK3CD| |ARAF, ARAF1|ANAPC5|GNAI2, GBI2|HSPCB|	http://www.genome.jp/kegg-bin/show_pathway?ssc04914/ssc:100152087%09red/ssc:100518131%09red/ssc:397601%09red/ssc:396610%09red/ssc:397523%09red/ssc:396742%09red/ssc:100620994%09red
Glycosphingolipid biosynthesis - globo series	KEGG PATHWAY	ssc00603	1	15	0.803215	1	ENSSSCG00000027146	ssc:100415928|	100415928|	|	http://www.genome.jp/kegg-bin/show_pathway?ssc00603/ssc:100415928%09red
Oxytocin signaling pathway	KEGG PATHWAY	ssc04921	14	161	0.806806	1	ENSSSCG00000010301|ENSSSCG00000003395|ENSSSCG00000009123|ENSSSCG00000022080|ENSSSCG00000021707|ENSSSCG00000000555|ENSSSCG00000008742|ENSSSCG00000013034|ENSSSCG00000007839|ENSSSCG00000011399|ENSSSCG00000007585|ENSSSCG00000006703|ENSSSCG00000028355|ENSSSCG00000007334	ssc:396603|ssc:100518131|ssc:397674|ssc:396849|ssc:100620994|ssc:100155015|ssc:100511702|ssc:100525148|ssc:100523723|ssc:397523|ssc:414396|ssc:100157793|ssc:397653|ssc:100154503|	396603|100518131|397674|396849|100620994|100155015|100511702|100525148|100523723|397523|414396|100157793|397653|100154503|	PPP3CB|PIK3CD|CAMK2D|RHOA| |ITPR3|CD38|PLCB3|EEF2K|GNAI2, GBI2|ACTB|PRKAB2|ACTB|SRC, c-Src|	http://www.genome.jp/kegg-bin/show_pathway?ssc04921/ssc:100518131%09red/ssc:100525148%09red/ssc:414396%09red/ssc:100523723%09red/ssc:396849%09red/ssc:396603%09red/ssc:100511702%09red/ssc:100154503%09red/ssc:397653%09red/ssc:397523%09red/ssc:100157793%09red/ssc:397674%09red/ssc:100620994%09red/ssc:100155015%09red
Primary bile acid biosynthesis	KEGG PATHWAY	ssc00120	1	16	0.822233	1	ENSSSCG00000028431	ssc:397574|	397574|	HSD17B4|	http://www.genome.jp/kegg-bin/show_pathway?ssc00120/ssc:397574%09red
Selenocompound metabolism	KEGG PATHWAY	ssc00450	1	16	0.822233	1	ENSSSCG00000007795	ssc:100037302|	100037302|	SEPHS2, SPS2|	http://www.genome.jp/kegg-bin/show_pathway?ssc00450/ssc:100037302%09red
Signaling pathways regulating pluripotency of stem cells	KEGG PATHWAY	ssc04550	11	132	0.825642	1	ENSSSCG00000016113|ENSSSCG00000003395|ENSSSCG00000017403|ENSSSCG00000014207|ENSSSCG00000025374|ENSSSCG00000001061|ENSSSCG00000009086|ENSSSCG00000002752|ENSSSCG00000021865|ENSSSCG00000024671|ENSSSCG00000005965	ssc:100127483|ssc:100518131|ssc:733648|ssc:100517932|ssc:100621038|ssc:100524569|ssc:397643|ssc:100519194|ssc:397093|ssc:100512949|ssc:448810|	100127483|100518131|733648|100517932|100621038|100524569|397643|100519194|397093|100512949|448810|	BMPR2|PIK3CD|STAT3|APC, APC1|DVL3|JARID2|FGF2|ZFHX3|INHBA|WNT9A|MYC|	http://www.genome.jp/kegg-bin/show_pathway?ssc04550/ssc:100519194%09red/ssc:100127483%09red/ssc:100512949%09red/ssc:733648%09red/ssc:100524569%09red/ssc:397093%09red/ssc:397643%09red/ssc:100621038%09red/ssc:448810%09red/ssc:100518131%09red/ssc:100517932%09red
MAPK signaling pathway	KEGG PATHWAY	ssc04010	22	249	0.832839	1	ENSSSCG00000028968|ENSSSCG00000010548|ENSSSCG00000008881|ENSSSCG00000028806|ENSSSCG00000020744|ENSSSCG00000015850|ENSSSCG00000003140|ENSSSCG00000011842|ENSSSCG00000011843|ENSSSCG00000002282|ENSSSCG00000009086|ENSSSCG00000005965|ENSSSCG00000001509|ENSSSCG00000010380|ENSSSCG00000012981|ENSSSCG00000017748|ENSSSCG00000023368|ENSSSCG00000004110|ENSSSCG00000008128|ENSSSCG00000008478|ENSSSCG00000010301|…	ssc:100627149|ssc:100135662|ssc:100517409|ssc:100626270|ssc:100512983|ssc:100514374|ssc:100302504|ssc:100525766|ssc:100511837|ssc:100517170|ssc:397643|ssc:448810|ssc:100524813|ssc:396610|ssc:100135665|ssc:100526136|ssc:100517317|ssc:100156182|ssc:100622812|ssc:100520187|ssc:396603|ssc:100522721|	100627149|100135662|100517409|100626270|100512983|100514374|100302504|100525766|100511837|100517170|397643|448810|100524813|396610|100135665|100526136|100517317|100156182|100622812|100520187|396603|100522721|	RAC1|CHUK, IKK-alpha|RAPGEF2|RPS6KA4|DUSP3|DUSP4|FGF21|PAK1|PAK2|MAX|FGF2|MYC|DAXX|MAPK8, JNK, JNK1|RELA|NF1| |TAB2|DUSP2| |PPP3CB|RASGRP1|	http://www.genome.jp/kegg-bin/show_pathway?ssc04010/ssc:448810%09red/ssc:100622812%09red/ssc:100517170%09red/ssc:100302504%09red/ssc:100524813%09red/ssc:100517317%09red/ssc:396603%09red/ssc:100512983%09red/ssc:100627149%09red/ssc:100511837%09red/ssc:100626270%09red/ssc:100156182%09red/ssc:100517409%09red/ssc:100526136%09red/ssc:100514374%09red/ssc:100135665%09red/ssc:397643%09red/ssc:100135662%09…
Vasopressin-regulated water reabsorption	KEGG PATHWAY	ssc04962	3	43	0.834294	1	ENSSSCG00000002538|ENSSSCG00000029542|ENSSSCG00000015948	ssc:100037291|ssc:100312966|ssc:100154566|	100037291|100312966|100154566|	DYNC1H1|DCTN6|DYNC1I2|	http://www.genome.jp/kegg-bin/show_pathway?ssc04962/ssc:100312966%09red/ssc:100037291%09red/ssc:100154566%09red
Glycosaminoglycan biosynthesis - keratan sulfate	KEGG PATHWAY	ssc00533	1	17	0.839414	1	ENSSSCG00000010998	ssc:100511655|	100511655|	B4GALT1|	http://www.genome.jp/kegg-bin/show_pathway?ssc00533/ssc:100511655%09red
Sulfur metabolism	KEGG PATHWAY	ssc00920	1	17	0.839414	1	ENSSSCG00000016714	ssc:100170131|	100170131|	CYCS, CYC|	http://www.genome.jp/kegg-bin/show_pathway?ssc00920/ssc:100170131%09red
Other glycan degradation	KEGG PATHWAY	ssc00511	1	17	0.839414	1	ENSSSCG00000006522	ssc:449572|	449572|	GBA|	http://www.genome.jp/kegg-bin/show_pathway?ssc00511/ssc:449572%09red
Aminoacyl-tRNA biosynthesis	KEGG PATHWAY	ssc00970	5	68	0.845566	1	ENSSSCG00000006835|ENSSSCG00000027748|ENSSSCG00000024638|ENSSSCG00000002516|ENSSSCG00000009015	ssc:100155484|ssc:100516215|ssc:100270813|ssc:100515390|ssc:100518383|	100155484|100516215|100270813|100515390|100518383|	SARS|IARS2|VARS|WARS|PET112|	http://www.genome.jp/kegg-bin/show_pathway?ssc00970/ssc:100518383%09red/ssc:100270813%09red/ssc:100155484%09red/ssc:100515390%09red/ssc:100516215%09red
HTLV-I infection	KEGG PATHWAY	ssc05166	22	253	0.851324	1	ENSSSCG00000001341|ENSSSCG00000024671|ENSSSCG00000024161|ENSSSCG00000012397|ENSSSCG00000010548|ENSSSCG00000009814|ENSSSCG00000010224|ENSSSCG00000005478|ENSSSCG00000025374|ENSSSCG00000026635|ENSSSCG00000000068|ENSSSCG00000005965|ENSSSCG00000011102|ENSSSCG00000012981|ENSSSCG00000003395|ENSSSCG00000021707|ENSSSCG00000014207|ENSSSCG00000017414|ENSSSCG00000007606|ENSSSCG00000001952|ENSSSCG00000007026|…	ssc:100135031|ssc:100512949|ssc:396650|ssc:397156|ssc:100135662|ssc:100152087|ssc:100038004|ssc:100517450|ssc:100621038|ssc:397404|ssc:100156226|ssc:448810|ssc:100286859|ssc:100135665|ssc:100518131|ssc:100620994|ssc:100517932|ssc:100524215|ssc:100521781|ssc:406188|ssc:397651|ssc:396603|	100135031|100512949|396650|397156|100135662|100152087|100038004|100517450|100621038|397404|100156226|448810|100286859|100135665|100518131|100620994|100517932|100524215|100521781|406188|397651|396603|	SLA-2, SLA-B|WNT9A|SLA-7|IL2RG|CHUK, IKK-alpha|ANAPC5|EGR2|POLE3|DVL3|SLC2A1, GLUT1|EP300|MYC|NRP1|RELA|PIK3CD| |APC, APC1|KAT2A|TRRAP|NFKBIA, ECI-6/IKBA, IKBA|VDAC1P5, VDAC3, VDAC5P|PPP3CB|	http://www.genome.jp/kegg-bin/show_pathway?ssc05166/ssc:100152087%09red/ssc:448810%09red/ssc:100512949%09red/ssc:100521781%09red/ssc:100156226%09red/ssc:100517450%09red/ssc:397651%09red/ssc:396603%09red/ssc:100620994%09red/ssc:100524215%09red/ssc:100135665%09red/ssc:100621038%09red/ssc:100135662%09red/ssc:406188%09red/ssc:100518131%09red/ssc:100038004%09red/ssc:397156%09red/ssc:100135031%09red/ss…
One carbon pool by folate	KEGG PATHWAY	ssc00670	1	18	0.854935	1	ENSSSCG00000000839	ssc:100151976|	100151976|	ALDH1L2|	http://www.genome.jp/kegg-bin/show_pathway?ssc00670/ssc:100151976%09red
ECM-receptor interaction	KEGG PATHWAY	ssc04512	6	82	0.863924	1	ENSSSCG00000000293|ENSSSCG00000016034|ENSSSCG00000015618|ENSSSCG00000022204|ENSSSCG00000009544|ENSSSCG00000009545	ssc:100155091|ssc:100152001|ssc:100513489|ssc:100623869|ssc:100515336|ssc:100153454|	100155091|100152001|100513489|100623869|100515336|100153454|	ITGA5|COL3A1|LAMB3|AGRN|COL4A1|COL4A2|	http://www.genome.jp/kegg-bin/show_pathway?ssc04512/ssc:100623869%09red/ssc:100515336%09red/ssc:100153454%09red/ssc:100155091%09red/ssc:100513489%09red/ssc:100152001%09red
Taste transduction	KEGG PATHWAY	ssc04742	2	33	0.864653	1	ENSSSCG00000021525|ENSSSCG00000000555	ssc:100620853|ssc:100155015|	100620853|100155015|	|ITPR3|	http://www.genome.jp/kegg-bin/show_pathway?ssc04742/ssc:100155015%09red/ssc:100620853%09red
Tyrosine metabolism	KEGG PATHWAY	ssc00350	2	33	0.864653	1	ENSSSCG00000003192|ENSSSCG00000009185	ssc:100522257|ssc:100513555|	100522257|100513555|	IL4I1|ADH5|	http://www.genome.jp/kegg-bin/show_pathway?ssc00350/ssc:100522257%09red/ssc:100513555%09red
Calcium signaling pathway	KEGG PATHWAY	ssc04020	15	182	0.865432	1	ENSSSCG00000004248|ENSSSCG00000028069|ENSSSCG00000009477|ENSSSCG00000009123|ENSSSCG00000021707|ENSSSCG00000000555|ENSSSCG00000027344|ENSSSCG00000008742|ENSSSCG00000013034|ENSSSCG00000009406|ENSSSCG00000009664|ENSSSCG00000007139|ENSSSCG00000023912|ENSSSCG00000010301|ENSSSCG00000007026	ssc:397421|ssc:733701|ssc:414911|ssc:397674|ssc:100620994|ssc:100155015|ssc:396875|ssc:100511702|ssc:100525148|ssc:397432|ssc:100157507|ssc:552898|ssc:100521440|ssc:396603|ssc:397651|	397421|733701|414911|397674|100620994|100155015|396875|100511702|100525148|397432|100157507|552898|100521440|396603|397651|	PLN|ATP2B4, PMCA4|EDNRB, ETB|CAMK2D| |ITPR3|ATP2A2, ATP2, SERCA2|CD38|PLCB3|HTR2A, 5-HT2A|PTK2B|ADRA1D| |PPP3CB|VDAC1P5, VDAC3, VDAC5P|	http://www.genome.jp/kegg-bin/show_pathway?ssc04020/ssc:100525148%09red/ssc:100155015%09red/ssc:397651%09red/ssc:100521440%09red/ssc:414911%09red/ssc:733701%09red/ssc:396603%09red/ssc:397432%09red/ssc:100511702%09red/ssc:552898%09red/ssc:396875%09red/ssc:100157507%09red/ssc:397421%09red/ssc:397674%09red/ssc:100620994%09red
Phenylalanine metabolism	KEGG PATHWAY	ssc00360	1	19	0.868956	1	ENSSSCG00000003192	ssc:100522257|	100522257|	IL4I1|	http://www.genome.jp/kegg-bin/show_pathway?ssc00360/ssc:100522257%09red
Glycosaminoglycan degradation	KEGG PATHWAY	ssc00531	1	19	0.868956	1	ENSSSCG00000012731	ssc:100512880|	100512880|	IDS|	http://www.genome.jp/kegg-bin/show_pathway?ssc00531/ssc:100512880%09red
Terpenoid backbone biosynthesis	KEGG PATHWAY	ssc00900	1	19	0.868956	1	ENSSSCG00000029066	ssc:100739304|	100739304|	|	http://www.genome.jp/kegg-bin/show_pathway?ssc00900/ssc:100739304%09red
Staphylococcus aureus infection	KEGG PATHWAY	ssc05150	3	47	0.873513	1	ENSSSCG00000006678|ENSSSCG00000029371|ENSSSCG00000010893	ssc:613130|ssc:100048955|ssc:397525|	613130|100048955|397525|	FCGR1A|C5AR1, C5R1|CFH, HF1|	http://www.genome.jp/kegg-bin/show_pathway?ssc05150/ssc:397525%09red/ssc:613130%09red/ssc:100048955%09red
Prion diseases	KEGG PATHWAY	ssc05020	2	34	0.874981	1	ENSSSCG00000021620|ENSSSCG00000004421	ssc:100623923|ssc:791125|	100623923|791125|	STIP1|FYN, PKC|	http://www.genome.jp/kegg-bin/show_pathway?ssc05020/ssc:100623923%09red/ssc:791125%09red
Thyroid hormone synthesis	KEGG PATHWAY	ssc04918	5	72	0.876462	1	ENSSSCG00000000555|ENSSSCG00000006740|ENSSSCG00000006733|ENSSSCG00000013034|ENSSSCG00000021707	ssc:100155015|ssc:397481|ssc:100156166|ssc:100525148|ssc:100620994|	100155015|397481|100156166|100525148|100620994|	ITPR3|ATP1A1|TTF2|PLCB3| |	http://www.genome.jp/kegg-bin/show_pathway?ssc04918/ssc:100525148%09red/ssc:100155015%09red/ssc:100156166%09red/ssc:100620994%09red/ssc:397481%09red
Adrenergic signaling in cardiomyocytes	KEGG PATHWAY	ssc04261	11	141	0.878486	1	ENSSSCG00000004248|ENSSSCG00000003395|ENSSSCG00000028069|ENSSSCG00000009123|ENSSSCG00000021707|ENSSSCG00000009657|ENSSSCG00000013034|ENSSSCG00000006740|ENSSSCG00000024413|ENSSSCG00000007139|ENSSSCG00000011399	ssc:397421|ssc:100518131|ssc:733701|ssc:397674|ssc:100620994|ssc:397090|ssc:100525148|ssc:397481|ssc:397088|ssc:552898|ssc:397523|	397421|100518131|733701|397674|100620994|397090|100525148|397481|397088|552898|397523|	PLN|PIK3CD|ATP2B4, PMCA4|CAMK2D| |PPP2R2A|PLCB3|ATP1A1|PPP2R1A|ADRA1D|GNAI2, GBI2|	http://www.genome.jp/kegg-bin/show_pathway?ssc04261/ssc:100518131%09red/ssc:100525148%09red/ssc:397088%09red/ssc:397421%09red/ssc:733701%09red/ssc:552898%09red/ssc:397523%09red/ssc:397090%09red/ssc:397674%09red/ssc:100620994%09red/ssc:397481%09red
Renin-angiotensin system	KEGG PATHWAY	ssc04614	1	20	0.881623	1	ENSSSCG00000001849	ssc:397520|	397520|	ANPEP, APN, PEPN|	http://www.genome.jp/kegg-bin/show_pathway?ssc04614/ssc:397520%09red
Cardiac muscle contraction	KEGG PATHWAY	ssc04260	5	73	0.88331	1	ENSSSCG00000018094|ENSSSCG00000008466|ENSSSCG00000006740|ENSSSCG00000011356|ENSSSCG00000014145	ssc:808513|ssc:100516606|ssc:397481|ssc:100156879|ssc:100037990|	808513|100516606|397481|100156879|100037990|	CYTB| |ATP1A1| |COX7C, COX7C1|	http://www.genome.jp/kegg-bin/show_pathway?ssc04260/ssc:100156879%09red/ssc:808513%09red/ssc:100516606%09red/ssc:100037990%09red/ssc:397481%09red
Graft-versus-host disease	KEGG PATHWAY	ssc05332	2	35	0.884578	1	ENSSSCG00000024161|ENSSSCG00000001341	ssc:396650|ssc:100135031|	396650|100135031|	SLA-7|SLA-2, SLA-B|	http://www.genome.jp/kegg-bin/show_pathway?ssc05332/ssc:396650%09red/ssc:100135031%09red
DNA replication	KEGG PATHWAY	ssc03030	2	35	0.884578	1	ENSSSCG00000012979|ENSSSCG00000005478	ssc:100517142|ssc:100517450|	100517142|100517450|	RNASEH2C|POLE3|	http://www.genome.jp/kegg-bin/show_pathway?ssc03030/ssc:100517142%09red/ssc:100517450%09red
Insulin secretion	KEGG PATHWAY	ssc04911	6	86	0.889912	1	ENSSSCG00000009123|ENSSSCG00000021707|ENSSSCG00000013034|ENSSSCG00000006740|ENSSSCG00000026635|ENSSSCG00000000555	ssc:397674|ssc:100620994|ssc:100525148|ssc:397481|ssc:397404|ssc:100155015|	397674|100620994|100525148|397481|397404|100155015|	CAMK2D| |PLCB3|ATP1A1|SLC2A1, GLUT1|ITPR3|	http://www.genome.jp/kegg-bin/show_pathway?ssc04911/ssc:100525148%09red/ssc:100155015%09red/ssc:397404%09red/ssc:397674%09red/ssc:100620994%09red/ssc:397481%09red
alpha-Linolenic acid metabolism	KEGG PATHWAY	ssc00592	1	22	0.903403	1	ENSSSCG00000003497	ssc:100512662|	100512662|	PLA2G2D|	http://www.genome.jp/kegg-bin/show_pathway?ssc00592/ssc:100512662%09red
Histidine metabolism	KEGG PATHWAY	ssc00340	1	22	0.903403	1	ENSSSCG00000006324	ssc:100153809|	100153809|	ALDH9A1|	http://www.genome.jp/kegg-bin/show_pathway?ssc00340/ssc:100153809%09red
Proximal tubule bicarbonate reclamation	KEGG PATHWAY	ssc04964	1	22	0.903403	1	ENSSSCG00000006740	ssc:397481|	397481|	ATP1A1|	http://www.genome.jp/kegg-bin/show_pathway?ssc04964/ssc:397481%09red
Cholinergic synapse	KEGG PATHWAY	ssc04725	8	113	0.90789	1	ENSSSCG00000003395|ENSSSCG00000013261|ENSSSCG00000009123|ENSSSCG00000021707|ENSSSCG00000004421|ENSSSCG00000013034|ENSSSCG00000000555|ENSSSCG00000011399	ssc:100518131|ssc:100516483|ssc:397674|ssc:100620994|ssc:791125|ssc:100525148|ssc:100155015|ssc:397523|	100518131|100516483|397674|100620994|791125|100525148|100155015|397523|	PIK3CD|CHRM4|CAMK2D| |FYN, PKC|PLCB3|ITPR3|GNAI2, GBI2|	http://www.genome.jp/kegg-bin/show_pathway?ssc04725/ssc:100518131%09red/ssc:100525148%09red/ssc:791125%09red/ssc:397523%09red/ssc:397674%09red/ssc:100516483%09red/ssc:100620994%09red/ssc:100155015%09red
Regulation of autophagy	KEGG PATHWAY	ssc04140	2	38	0.90942	1	ENSSSCG00000014819|ENSSSCG00000025026	ssc:100511396|ssc:100739353|	100511396|100739353|	ATG16L2| |	http://www.genome.jp/kegg-bin/show_pathway?ssc04140/ssc:100511396%09red/ssc:100739353%09red
Morphine addiction	KEGG PATHWAY	ssc05032	6	90	0.911552	1	ENSSSCG00000013641|ENSSSCG00000001810|ENSSSCG00000021707|ENSSSCG00000027558|ENSSSCG00000011399|ENSSSCG00000009956	ssc:396825|ssc:100514527|ssc:100620994|ssc:100511175|ssc:397523|ssc:100156449|	396825|100514527|100620994|100511175|397523|100156449|	PDE4A|PDE8A| |GABBR2|GNAI2, GBI2|ADRBK2|	http://www.genome.jp/kegg-bin/show_pathway?ssc05032/ssc:100156449%09red/ssc:100514527%09red/ssc:397523%09red/ssc:100511175%09red/ssc:100620994%09red/ssc:396825%09red
Pentose phosphate pathway	KEGG PATHWAY	ssc00030	1	23	0.912741	1	ENSSSCG00000008207	ssc:100038014|	100038014|	RPIA|	http://www.genome.jp/kegg-bin/show_pathway?ssc00030/ssc:100038014%09red
Asthma	KEGG PATHWAY	ssc05310	1	24	0.921176	1	ENSSSCG00000014278	ssc:397409|	397409|	IL-5, IL5|	http://www.genome.jp/kegg-bin/show_pathway?ssc05310/ssc:397409%09red
Mismatch repair	KEGG PATHWAY	ssc03430	1	24	0.921176	1	ENSSSCG00000024222	ssc:100337665|	100337665|	MLH1|	http://www.genome.jp/kegg-bin/show_pathway?ssc03430/ssc:100337665%09red
Protein digestion and absorption	KEGG PATHWAY	ssc04974	5	80	0.922705	1	ENSSSCG00000016034|ENSSSCG00000025038|ENSSSCG00000006740|ENSSSCG00000009544|ENSSSCG00000009545	ssc:100152001|ssc:100151780|ssc:397481|ssc:100515336|ssc:100153454|	100152001|100151780|397481|100515336|100153454|	COL3A1|KCNJ13|ATP1A1|COL4A1|COL4A2|	http://www.genome.jp/kegg-bin/show_pathway?ssc04974/ssc:100515336%09red/ssc:100153454%09red/ssc:100151780%09red/ssc:100152001%09red/ssc:397481%09red
Glycerolipid metabolism	KEGG PATHWAY	ssc00561	3	54	0.922719	1	ENSSSCG00000022550|ENSSSCG00000027146|ENSSSCG00000006324	ssc:100623595|ssc:100415928|ssc:100153809|	100623595|100415928|100153809|	DGKG| |ALDH9A1|	http://www.genome.jp/kegg-bin/show_pathway?ssc00561/ssc:100623595%09red/ssc:100415928%09red/ssc:100153809%09red
Ether lipid metabolism	KEGG PATHWAY	ssc00565	2	41	0.92918	1	ENSSSCG00000028887|ENSSSCG00000003497	ssc:414900|ssc:100512662|	414900|100512662|	PLD2|PLA2G2D|	http://www.genome.jp/kegg-bin/show_pathway?ssc00565/ssc:100512662%09red/ssc:414900%09red
Oocyte meiosis	KEGG PATHWAY	ssc04114	7	107	0.932251	1	ENSSSCG00000009123|ENSSSCG00000021707|ENSSSCG00000009814|ENSSSCG00000024413|ENSSSCG00000002001|ENSSSCG00000000555|ENSSSCG00000010301	ssc:397674|ssc:100620994|ssc:100152087|ssc:397088|ssc:100152822|ssc:100155015|ssc:396603|	397674|100620994|100152087|397088|100152822|100155015|396603|	CAMK2D| |ANAPC5|PPP2R1A|REC8|ITPR3|PPP3CB|	http://www.genome.jp/kegg-bin/show_pathway?ssc04114/ssc:100152087%09red/ssc:100155015%09red/ssc:397088%09red/ssc:396603%09red/ssc:397674%09red/ssc:100152822%09red/ssc:100620994%09red
Retrograde endocannabinoid signaling	KEGG PATHWAY	ssc04723	6	95	0.933333	1	ENSSSCG00000010380|ENSSSCG00000021707|ENSSSCG00000013034|ENSSSCG00000011399|ENSSSCG00000000555|ENSSSCG00000013079	ssc:396610|ssc:100620994|ssc:100525148|ssc:397523|ssc:100155015|ssc:100520824|	396610|100620994|100525148|397523|100155015|100520824|	MAPK8, JNK, JNK1| |PLCB3|GNAI2, GBI2|ITPR3|DAGLA|	http://www.genome.jp/kegg-bin/show_pathway?ssc04723/ssc:100525148%09red/ssc:100155015%09red/ssc:396610%09red/ssc:397523%09red/ssc:100520824%09red/ssc:100620994%09red
Mineral absorption	KEGG PATHWAY	ssc04978	2	42	0.934807	1	ENSSSCG00000006740|ENSSSCG00000026759	ssc:397481|ssc:445512|	397481|445512|	ATP1A1|HMOX1, HSP32|	http://www.genome.jp/kegg-bin/show_pathway?ssc04978/ssc:445512%09red/ssc:397481%09red
Type I diabetes mellitus	KEGG PATHWAY	ssc04940	2	42	0.934807	1	ENSSSCG00000024161|ENSSSCG00000001341	ssc:396650|ssc:100135031|	396650|100135031|	SLA-7|SLA-2, SLA-B|	http://www.genome.jp/kegg-bin/show_pathway?ssc04940/ssc:396650%09red/ssc:100135031%09red
Basal transcription factors	KEGG PATHWAY	ssc03022	2	42	0.934807	1	ENSSSCG00000022421|ENSSSCG00000024694	ssc:100626869|ssc:100626452|	100626869|100626452|	GTF2F2|TAF4|	http://www.genome.jp/kegg-bin/show_pathway?ssc03022/ssc:100626452%09red/ssc:100626869%09red
Dopaminergic synapse	KEGG PATHWAY	ssc04728	8	120	0.935448	1	ENSSSCG00000010380|ENSSSCG00000009123|ENSSSCG00000000555|ENSSSCG00000013034|ENSSSCG00000009657|ENSSSCG00000024413|ENSSSCG00000010301|ENSSSCG00000011399	ssc:396610|ssc:397674|ssc:100155015|ssc:100525148|ssc:397090|ssc:397088|ssc:396603|ssc:397523|	396610|397674|100155015|100525148|397090|397088|396603|397523|	MAPK8, JNK, JNK1|CAMK2D|ITPR3|PLCB3|PPP2R2A|PPP2R1A|PPP3CB|GNAI2, GBI2|	http://www.genome.jp/kegg-bin/show_pathway?ssc04728/ssc:100525148%09red/ssc:100155015%09red/ssc:397088%09red/ssc:396610%09red/ssc:397090%09red/ssc:396603%09red/ssc:397523%09red/ssc:397674%09red
Glycerophospholipid metabolism	KEGG PATHWAY	ssc00564	5	83	0.935623	1	ENSSSCG00000022550|ENSSSCG00000010032|ENSSSCG00000028887|ENSSSCG00000000214|ENSSSCG00000003497	ssc:100623595|ssc:100153506|ssc:414900|ssc:100153250|ssc:100512662|	100623595|100153506|414900|100153250|100512662|	DGKG|PISD|PLD2|GPD1|PLA2G2D|	http://www.genome.jp/kegg-bin/show_pathway?ssc00564/ssc:100512662%09red/ssc:100623595%09red/ssc:100153506%09red/ssc:100153250%09red/ssc:414900%09red
Dilated cardiomyopathy	KEGG PATHWAY	ssc05414	5	84	0.939478	1	ENSSSCG00000004248|ENSSSCG00000007585|ENSSSCG00000000293|ENSSSCG00000028355|ENSSSCG00000021707	ssc:397421|ssc:414396|ssc:100155091|ssc:397653|ssc:100620994|	397421|414396|100155091|397653|100620994|	PLN|ACTB|ITGA5|ACTB| |	http://www.genome.jp/kegg-bin/show_pathway?ssc05414/ssc:414396%09red/ssc:397421%09red/ssc:397653%09red/ssc:100620994%09red/ssc:100155091%09red
Circadian entrainment	KEGG PATHWAY	ssc04713	6	98	0.94399	1	ENSSSCG00000009123|ENSSSCG00000021707|ENSSSCG00000013034|ENSSSCG00000017983|ENSSSCG00000011399|ENSSSCG00000000555	ssc:397674|ssc:100620994|ssc:100525148|ssc:100620648|ssc:397523|ssc:100155015|	397674|100620994|100525148|100620648|397523|100155015|	CAMK2D| |PLCB3|PER1|GNAI2, GBI2|ITPR3|	http://www.genome.jp/kegg-bin/show_pathway?ssc04713/ssc:100525148%09red/ssc:100155015%09red/ssc:100620648%09red/ssc:397523%09red/ssc:397674%09red/ssc:100620994%09red
Intestinal immune network for IgA production	KEGG PATHWAY	ssc04672	2	44	0.944813	1	ENSSSCG00000009542|ENSSSCG00000014278	ssc:100038026|ssc:397409|	100038026|397409|	TNFSF13B, BAFF|IL-5, IL5|	http://www.genome.jp/kegg-bin/show_pathway?ssc04672/ssc:100038026%09red/ssc:397409%09red
Purine metabolism	KEGG PATHWAY	ssc00230	13	183	0.947202	1	ENSSSCG00000013641|ENSSSCG00000001810|ENSSSCG00000007970|ENSSSCG00000021707|ENSSSCG00000022912|ENSSSCG00000025233|ENSSSCG00000022880|ENSSSCG00000025298|ENSSSCG00000008399|ENSSSCG00000028278|ENSSSCG00000005478|ENSSSCG00000010981|ENSSSCG00000008017	ssc:396825|ssc:100514527|ssc:100521261|ssc:100620994|ssc:100623678|ssc:100642182|ssc:100642182|ssc:100626323|ssc:100642182|ssc:100737040|ssc:100517450|ssc:397577|ssc:100514398|	396825|100514527|100521261|100620994|100623678|100642182|100642182|100626323|100642182|100737040|100517450|397577|100514398|	PDE4A|PDE8A|POLR3K| |NT5C3A|PNPT1|PNPT1| |PNPT1|POLR2A|POLE3|NUDT2|NME3|	http://www.genome.jp/kegg-bin/show_pathway?ssc00230/ssc:100737040%09red/ssc:100623678%09red/ssc:100514398%09red/ssc:397577%09red/ssc:100642182%09red/ssc:100517450%09red/ssc:100514527%09red/ssc:100521261%09red/ssc:100626323%09red/ssc:100620994%09red/ssc:396825%09red
Complement and coagulation cascades	KEGG PATHWAY	ssc04610	4	73	0.947265	1	ENSSSCG00000029371|ENSSSCG00000000660|ENSSSCG00000015662|ENSSSCG00000010893	ssc:100048955|ssc:403166|ssc:100520761|ssc:397525|	100048955|403166|100520761|397525|	C5AR1, C5R1|A2M| |CFH, HF1|	http://www.genome.jp/kegg-bin/show_pathway?ssc04610/ssc:397525%09red/ssc:403166%09red/ssc:100048955%09red/ssc:100520761%09red
Mucin type O-Glycan biosynthesis	KEGG PATHWAY	ssc00512	1	28	0.947517	1	ENSSSCG00000003743	ssc:100738545|	100738545|	GALNT1|	http://www.genome.jp/kegg-bin/show_pathway?ssc00512/ssc:100738545%09red
Homologous recombination	KEGG PATHWAY	ssc03440	1	28	0.947517	1	ENSSSCG00000020961	ssc:100153762|	100153762|	BRCA2|	http://www.genome.jp/kegg-bin/show_pathway?ssc03440/ssc:100153762%09red
Serotonergic synapse	KEGG PATHWAY	ssc04726	7	112	0.948582	1	ENSSSCG00000010491|ENSSSCG00000012275|ENSSSCG00000013034|ENSSSCG00000009406|ENSSSCG00000000555|ENSSSCG00000011399|ENSSSCG00000026798	ssc:403111|ssc:397601|ssc:100525148|ssc:397432|ssc:100155015|ssc:397523|ssc:403111|	403111|397601|100525148|397432|100155015|397523|403111|	CYP2C42|ARAF, ARAF1|PLCB3|HTR2A, 5-HT2A|ITPR3|GNAI2, GBI2|CYP2C42|	http://www.genome.jp/kegg-bin/show_pathway?ssc04726/ssc:100525148%09red/ssc:100155015%09red/ssc:397601%09red/ssc:397432%09red/ssc:397523%09red/ssc:403111%09red
mTOR signaling pathway	KEGG PATHWAY	ssc04150	3	60	0.950204	1	ENSSSCG00000003395|ENSSSCG00000003413|ENSSSCG00000005169	ssc:100518131|ssc:100127359|ssc:100038023|	100518131|100127359|100038023|	PIK3CD|MTOR, FRAP1|RPS6|	http://www.genome.jp/kegg-bin/show_pathway?ssc04150/ssc:100518131%09red/ssc:100038023%09red/ssc:100127359%09red
Cocaine addiction	KEGG PATHWAY	ssc05030	2	46	0.953346	1	ENSSSCG00000011399|ENSSSCG00000012981	ssc:397523|ssc:100135665|	397523|100135665|	GNAI2, GBI2|RELA|	http://www.genome.jp/kegg-bin/show_pathway?ssc05030/ssc:100135665%09red/ssc:397523%09red
Systemic lupus erythematosus	KEGG PATHWAY	ssc05322	6	102	0.955819	1	ENSSSCG00000028829|ENSSSCG00000016440|ENSSSCG00000014780|ENSSSCG00000006678|ENSSSCG00000015938|ENSSSCG00000017202	ssc:100154511|ssc:100738744|ssc:100302538|ssc:613130|ssc:100152189|ssc:396970|	100154511|100738744|100302538|613130|100152189|396970|	HIST1H3E| |TRIM21|FCGR1A|SSB|H3F3A|	http://www.genome.jp/kegg-bin/show_pathway?ssc05322/ssc:100152189%09red/ssc:613130%09red/ssc:100154511%09red/ssc:100302538%09red/ssc:396970%09red/ssc:100738744%09red
Arachidonic acid metabolism	KEGG PATHWAY	ssc00590	3	62	0.957122	1	ENSSSCG00000010491|ENSSSCG00000026798|ENSSSCG00000003497	ssc:403111|ssc:403111|ssc:100512662|	403111|403111|100512662|	CYP2C42|CYP2C42|PLA2G2D|	http://www.genome.jp/kegg-bin/show_pathway?ssc00590/ssc:100512662%09red/ssc:403111%09red
Hedgehog signaling pathway	KEGG PATHWAY	ssc04340	2	47	0.957124	1	ENSSSCG00000027312|ENSSSCG00000024671	ssc:100627504|ssc:100512949|	100627504|100512949|	PTCH1|WNT9A|	http://www.genome.jp/kegg-bin/show_pathway?ssc04340/ssc:100627504%09red/ssc:100512949%09red
Other types of O-glycan biosynthesis	KEGG PATHWAY	ssc00514	1	30	0.957176	1	ENSSSCG00000010998	ssc:100511655|	100511655|	B4GALT1|	http://www.genome.jp/kegg-bin/show_pathway?ssc00514/ssc:100511655%09red
Drug metabolism - other enzymes	KEGG PATHWAY	ssc00983	1	31	0.961317	1	ENSSSCG00000016308	ssc:100511479|	100511479|	UGT1A3, UGT1A1|	http://www.genome.jp/kegg-bin/show_pathway?ssc00983/ssc:100511479%09red
Hypertrophic cardiomyopathy (HCM)	KEGG PATHWAY	ssc05410	4	78	0.962565	1	ENSSSCG00000000293|ENSSSCG00000006703|ENSSSCG00000028355|ENSSSCG00000007585	ssc:100155091|ssc:100157793|ssc:397653|ssc:414396|	100155091|100157793|397653|414396|	ITGA5|PRKAB2|ACTB|ACTB|	http://www.genome.jp/kegg-bin/show_pathway?ssc05410/ssc:414396%09red/ssc:100155091%09red/ssc:397653%09red/ssc:100157793%09red
N-Glycan biosynthesis	KEGG PATHWAY	ssc00510	2	49	0.963819	1	ENSSSCG00000010998|ENSSSCG00000004244	ssc:100511655|ssc:396919|	100511655|396919|	B4GALT1|MAN1A1, MAN1A|	http://www.genome.jp/kegg-bin/show_pathway?ssc00510/ssc:100511655%09red/ssc:396919%09red
Amphetamine addiction	KEGG PATHWAY	ssc05031	3	65	0.96583	1	ENSSSCG00000010235|ENSSSCG00000009123|ENSSSCG00000010301	ssc:751859|ssc:397674|ssc:396603|	751859|397674|396603|	SIRT1|CAMK2D|PPP3CB|	http://www.genome.jp/kegg-bin/show_pathway?ssc05031/ssc:397674%09red/ssc:751859%09red/ssc:396603%09red
MicroRNAs in cancer	KEGG PATHWAY	ssc05206	16	228	0.966384	1	ENSSSCG00000016113|ENSSSCG00000010235|ENSSSCG00000008478|ENSSSCG00000022101|ENSSSCG00000022080|ENSSSCG00000000293|ENSSSCG00000017403|ENSSSCG00000014207|ENSSSCG00000027855|ENSSSCG00000023610|ENSSSCG00000000068|ENSSSCG00000003413|ENSSSCG00000006709|ENSSSCG00000015246|ENSSSCG00000005965|ENSSSCG00000001516	ssc:100127483|ssc:751859|ssc:100520187|ssc:100049662|ssc:396849|ssc:100155091|ssc:733648|ssc:100517932|ssc:100307052|ssc:100517207|ssc:100156226|ssc:100127359|ssc:100153369|ssc:100517843|ssc:448810|ssc:397543|	100127483|751859|100520187|100049662|396849|100155091|733648|100517932|100307052|100517207|100156226|100127359|100153369|100517843|448810|397543|	BMPR2|SIRT1| |BRCA1|RHOA|ITGA5|STAT3|APC, APC1|SOCS1|MARCKS|EP300|MTOR, FRAP1|NOTCH2|ST14|MYC|BAK, Bak1|	http://www.genome.jp/kegg-bin/show_pathway?ssc05206/ssc:100127483%09red/ssc:448810%09red/ssc:733648%09red/ssc:100156226%09red/ssc:100155091%09red/ssc:100049662%09red/ssc:100307052%09red/ssc:397543%09red/ssc:100517207%09red/ssc:100517843%09red/ssc:396849%09red/ssc:100127359%09red/ssc:100153369%09red/ssc:100520187%09red/ssc:751859%09red/ssc:100517932%09red
Fat digestion and absorption	KEGG PATHWAY	ssc04975	1	34	0.97149	1	ENSSSCG00000003497	ssc:100512662|	100512662|	PLA2G2D|	http://www.genome.jp/kegg-bin/show_pathway?ssc04975/ssc:100512662%09red
Glutamatergic synapse	KEGG PATHWAY	ssc04724	7	123	0.972767	1	ENSSSCG00000021707|ENSSSCG00000000555|ENSSSCG00000013034|ENSSSCG00000010301|ENSSSCG00000011399|ENSSSCG00000028887|ENSSSCG00000009956	ssc:100620994|ssc:100155015|ssc:100525148|ssc:396603|ssc:397523|ssc:414900|ssc:100156449|	100620994|100155015|100525148|396603|397523|414900|100156449|	|ITPR3|PLCB3|PPP3CB|GNAI2, GBI2|PLD2|ADRBK2|	http://www.genome.jp/kegg-bin/show_pathway?ssc04724/ssc:100525148%09red/ssc:100155015%09red/ssc:396603%09red/ssc:414900%09red/ssc:100156449%09red/ssc:397523%09red/ssc:100620994%09red
Alanine, aspartate and glutamate metabolism	KEGG PATHWAY	ssc00250	1	36	0.976738	1	ENSSSCG00000003192	ssc:100522257|	100522257|	IL4I1|	http://www.genome.jp/kegg-bin/show_pathway?ssc00250/ssc:100522257%09red
GABAergic synapse	KEGG PATHWAY	ssc04727	4	85	0.977158	1	ENSSSCG00000011399|ENSSSCG00000027558|ENSSSCG00000007334|ENSSSCG00000021707	ssc:397523|ssc:100511175|ssc:100154503|ssc:100620994|	397523|100511175|100154503|100620994|	GNAI2, GBI2|GABBR2|SRC, c-Src| |	http://www.genome.jp/kegg-bin/show_pathway?ssc04727/ssc:100154503%09red/ssc:100620994%09red/ssc:397523%09red/ssc:100511175%09red
Cell adhesion molecules (CAMs)	KEGG PATHWAY	ssc04514	8	146	0.984935	1	ENSSSCG00000017277|ENSSSCG00000003592|ENSSSCG00000001341|ENSSSCG00000005211|ENSSSCG00000014136|ENSSSCG00000024161|ENSSSCG00000026305|ENSSSCG00000006738	ssc:396941|ssc:100516859|ssc:100135031|ssc:574058|ssc:397328|ssc:396650|ssc:574057|ssc:396702|	396941|100516859|100135031|574058|397328|396650|574057|396702|	PECAM1, CD31, PECAM-1|SDC3|SLA-2, SLA-B|CD274, PDL1|VCAN, CSPG2|SLA-7|PDCD1LG2, PDL2|CD58|	http://www.genome.jp/kegg-bin/show_pathway?ssc04514/ssc:574057%09red/ssc:100135031%09red/ssc:574058%09red/ssc:100516859%09red/ssc:396702%09red/ssc:397328%09red/ssc:396650%09red/ssc:396941%09red
Nucleotide excision repair	KEGG PATHWAY	ssc03420	1	44	0.989692	1	ENSSSCG00000005478	ssc:100517450|	100517450|	POLE3|	http://www.genome.jp/kegg-bin/show_pathway?ssc03420/ssc:100517450%09red
Alcoholism	KEGG PATHWAY	ssc05034	6	143	0.997021	1	ENSSSCG00000028829|ENSSSCG00000012275|ENSSSCG00000016440|ENSSSCG00000008478|ENSSSCG00000011399|ENSSSCG00000017202	ssc:100154511|ssc:397601|ssc:100738744|ssc:100520187|ssc:397523|ssc:396970|	100154511|397601|100738744|100520187|397523|396970|	HIST1H3E|ARAF, ARAF1| | |GNAI2, GBI2|H3F3A|	http://www.genome.jp/kegg-bin/show_pathway?ssc05034/ssc:100154511%09red/ssc:397523%09red/ssc:396970%09red/ssc:100520187%09red/ssc:100738744%09red/ssc:397601%09red
Cell cycle	KEGG PATHWAY	ssc04110	4	115	0.997626	1	ENSSSCG00000000068|ENSSSCG00000005965|ENSSSCG00000009560|ENSSSCG00000009814	ssc:100156226|ssc:448810|ssc:100621036|ssc:100152087|	100156226|448810|100621036|100152087|	EP300|MYC|TFDP1|ANAPC5|	http://www.genome.jp/kegg-bin/show_pathway?ssc04110/ssc:100152087%09red/ssc:100156226%09red/ssc:100621036%09red/ssc:448810%09red
Metabolic pathways	KEGG PATHWAY	ssc01100	93	1166	0.998373	1	ENSSSCG00000001852|ENSSSCG00000008742|ENSSSCG00000003497|ENSSSCG00000010998|ENSSSCG00000010855|ENSSSCG00000012035|ENSSSCG00000000576|ENSSSCG00000007307|ENSSSCG00000016308|ENSSSCG00000017401|ENSSSCG00000007872|ENSSSCG00000007970|ENSSSCG00000026955|ENSSSCG00000026798|ENSSSCG00000009594|ENSSSCG00000012347|ENSSSCG00000008207|ENSSSCG00000013596|ENSSSCG00000004846|ENSSSCG00000009680|ENSSSCG00000025881|…	ssc:397603|ssc:100511702|ssc:100512662|ssc:100511655|ssc:100524702|ssc:100525664|ssc:100621540|ssc:100156145|ssc:100511479|ssc:100523018|ssc:100514160|ssc:100521261|ssc:100155321|ssc:403111|ssc:100739638|ssc:100518817|ssc:100038014|ssc:100517634|ssc:100037986|ssc:100152703|ssc:100516042|ssc:100522362|ssc:100623678|ssc:100154014|ssc:100512880|ssc:100526233|ssc:397012|ssc:100156865|ssc:100518959|ss…	397603|100511702|100512662|100511655|100524702|100525664|100621540|100156145|100511479|100523018|100514160|100521261|100155321|403111|100739638|100518817|100038014|100517634|100037986|100152703|100516042|100522362|100623678|100154014|100512880|100526233|397012|100156865|100518959|414900|407608|100737040|100522672|100623872|100523714|397645|100515069|100153506|100170131|100626323|100513555|1000373…	IDH2|CD38|PLA2G2D|B4GALT1|PYCR2|SYNJ1|LDHB, LDH-B, LDH-H| |UGT1A3, UGT1A1|ATP6V0A1|XYLT1|POLR3K|ACER2|CYP2C42|SPTLC1|ALAS2|RPIA|NDUFA7|MCEE|EXTL3|PDHB|EXT2|NT5C3A|GRHPR|IDS|COQ2|HADHA|OAT|ATP6V0C|PLD2|PGK1|POLR2A| |CMPK2|PIP5KL1|SAT1, SAT|NDUFA1|PISD|CYCS, CYC| |ADH5|SEPHS2, SPS2| |CYP2C42|GALNT1|CTPS1|PI4KA|XYLB|ECHS1|AHCY|NDUFAB1|IDO1, IDO|HK2|GNPDA1|MCAT|MAN1A1, MAN1A|PI4K2B|IL4I1|GMPPB|ATP6V1…	http://www.genome.jp/kegg-bin/show_pathway?ssc01100/ssc:100312976%09red/ssc:100621540%09red/ssc:100512880%09red/ssc:100512662%09red/ssc:100512094%09red/ssc:100152703%09red/ssc:396950%09red/ssc:100038014%09red/ssc:100153809%09red/ssc:100156879%09red/ssc:449572%09red/ssc:100515069%09red/ssc:100154942%09red/ssc:100523714%09red/ssc:100623678%09red/ssc:100514160%09red/ssc:100514398%09red/ssc:100523018…
PPAR signaling pathway	KEGG PATHWAY	ssc03320	1	68	0.999105	1	ENSSSCG00000010554	ssc:396670|	396670|	SCD|	http://www.genome.jp/kegg-bin/show_pathway?ssc03320/ssc:396670%09red
Neuroactive ligand-receptor interaction	KEGG PATHWAY	ssc04080	12	268	0.999766	1	ENSSSCG00000013261|ENSSSCG00000027849|ENSSSCG00000011712|ENSSSCG00000005457|ENSSSCG00000009477|ENSSSCG00000014089|ENSSSCG00000027558|ENSSSCG00000009406|ENSSSCG00000011754|ENSSSCG00000007139|ENSSSCG00000009402|ENSSSCG00000029371	ssc:100516483|ssc:100621002|ssc:100524220|ssc:100512581|ssc:414911|ssc:100519355|ssc:100511175|ssc:397432|ssc:397372|ssc:552898|ssc:100738399|ssc:100048955|	100516483|100621002|100524220|100512581|414911|100519355|100511175|397432|397372|552898|100738399|100048955|	CHRM4|CNR2|P2RY14|LPAR1|EDNRB, ETB|F2RL2|GABBR2|HTR2A, 5-HT2A|GHSR|ADRA1D|LPAR6|C5AR1, C5R1|	http://www.genome.jp/kegg-bin/show_pathway?ssc04080/ssc:100738399%09red/ssc:100512581%09red/ssc:414911%09red/ssc:397372%09red/ssc:100519355%09red/ssc:100516483%09red/ssc:397432%09red/ssc:552898%09red/ssc:100621002%09red/ssc:100511175%09red/ssc:100048955%09red/ssc:100524220%09red
Olfactory transduction	KEGG PATHWAY	ssc04740	8	810	1	1	ENSSSCG00000009123|ENSSSCG00000001196|ENSSSCG00000021160|ENSSSCG00000003958|ENSSSCG00000014742|ENSSSCG00000014781|ENSSSCG00000013197|ENSSSCG00000015159	ssc:397674|ssc:100154909|ssc:100153881|ssc:100737941|ssc:100521811|ssc:100518798|ssc:100518356|ssc:100512247|	397674|100154909|100153881|100737941|100521811|100518798|100518356|100512247|	CAMK2D| | | | | | | |	http://www.genome.jp/kegg-bin/show_pathway?ssc04740/ssc:100153881%09red/ssc:100154909%09red/ssc:100737941%09red/ssc:100518356%09red/ssc:397674%09red/ssc:100521811%09red/ssc:100518798%09red/ssc:100512247%09red

## Sheet: VR2332 Down
##Databases: KEGG PATHWAY
##Statistical test method: hypergeometric test / Fisher's exact test
##FDR correction method: Benjamini and Hochberg
#Term	Database	ID	Input number	Background number	P-Value	Corrected P-Value	Input	KO	Entrez_ID	KO_name	Hyperlink
Alzheimer's disease	KEGG PATHWAY	ssc05010	18	175	0.00246312	0.461932	ENSSSCG00000008208|ENSSSCG00000012327|ENSSSCG00000027085|ENSSSCG00000000905|ENSSSCG00000026049|ENSSSCG00000011764|ENSSSCG00000024313|ENSSSCG00000014371|ENSSSCG00000010860|ENSSSCG00000013034|ENSSSCG00000003088|ENSSSCG00000016893|ENSSSCG00000006385|ENSSSCG00000000719|ENSSSCG00000004499|ENSSSCG00000006166|ENSSSCG00000007058|ENSSSCG00000005528	ssc:100513348|ssc:100524293|ssc:100522678|ssc:100518016|ssc:100626234|ssc:100523751|ssc:100579141|ssc:100520950|ssc:780410|ssc:100525148|ssc:397576|ssc:100516161|ssc:100156098|ssc:100524622|ssc:100157880|ssc:448979|ssc:100516581|ssc:100154443|	100513348|100524293|100522678|100518016|100626234|100523751|100579141|100520950|780410|100525148|397576|100516161|100156098|100524622|100157880|448979|100516581|100154443|	EIF2AK3|HSD17B10| |NDUFA12| |NDUFB5|NDUFA4|NDUFA2|PSEN2, PS-2|PLCB3|APOE|NDUFS4|NCSTN|NDUFA9|ATP5A1, ATP5A2|NDUFB8|PLCB4|NDUFA8|	http://www.genome.jp/kegg-bin/show_pathway?ssc05010/ssc:100524293%09red/ssc:100525148%09red/ssc:448979%09red/ssc:100156098%09red/ssc:780410%09red/ssc:100154443%09red/ssc:100516581%09red/ssc:397576%09red/ssc:100626234%09red/ssc:100579141%09red/ssc:100513348%09red/ssc:100524622%09red/ssc:100523751%09red/ssc:100520950%09red/ssc:100518016%09red/ssc:100522678%09red/ssc:100157880%09red/ssc:100516161%09…
Cytosolic DNA-sensing pathway	KEGG PATHWAY	ssc04623	9	61	0.00369546	0.461932	ENSSSCG00000006543|ENSSSCG00000017705|ENSSSCG00000023003|ENSSSCG00000030408|ENSSSCG00000000063|ENSSSCG00000015037|ENSSSCG00000021383|ENSSSCG00000007508|ENSSSCG00000028007	ssc:100523784|ssc:396613|ssc:102159905|ssc:396723|ssc:100157033|ssc:397057|ssc:100516408|ssc:100144524|ssc:414414|	100523784|396613|102159905|396723|100157033|397057|100516408|100144524|414414|	ADAR|CCL5, RANTES| |DDX58, RHIV-1, RIG-1, RIG-I, RLR-1|POLR3H|IL18, IL-18|MB21D1|ZBP1, DAI|RPA39|	http://www.genome.jp/kegg-bin/show_pathway?ssc04623/ssc:396723%09red/ssc:100144524%09red/ssc:397057%09red/ssc:396613%09red/ssc:102159905%09red/ssc:100516408%09red/ssc:100157033%09red/ssc:100523784%09red/ssc:414414%09red
Sulfur metabolism	KEGG PATHWAY	ssc00920	4	17	0.0126242	0.993602	ENSSSCG00000027672|ENSSSCG00000010437|ENSSSCG00000006242|ENSSSCG00000026049	ssc:100625272|ssc:100156262|ssc:100156925|ssc:100626234|	100625272|100156262|100156925|100626234|	SUOX|PAPSS2|IMPAD1, IMPA3, gPAPP| |	http://www.genome.jp/kegg-bin/show_pathway?ssc00920/ssc:100156262%09red/ssc:100626234%09red/ssc:100156925%09red/ssc:100625272%09red
Metabolic pathways	KEGG PATHWAY	ssc01100	70	1166	0.0217602	0.993602	ENSSSCG00000011764|ENSSSCG00000016516|ENSSSCG00000024313|ENSSSCG00000027085|ENSSSCG00000022300|ENSSSCG00000028210|ENSSSCG00000009268|ENSSSCG00000015030|ENSSSCG00000012742|ENSSSCG00000010765|ENSSSCG00000010855|ENSSSCG00000011845|ENSSSCG00000009889|ENSSSCG00000023983|ENSSSCG00000017695|ENSSSCG00000011389|ENSSSCG00000007307|ENSSSCG00000007058|ENSSSCG00000008773|ENSSSCG00000012859|ENSSSCG00000014371|…	ssc:100523751|ssc:100519402|ssc:100579141|ssc:100522678|ssc:100312974|ssc:100526240|ssc:396914|ssc:397054|ssc:100516892|ssc:100512501|ssc:100524702|ssc:100512194|ssc:733685|ssc:100627169|ssc:397324|ssc:100513376|ssc:100156145|ssc:100516581|ssc:100522261|ssc:100516661|ssc:100520950|ssc:399538|ssc:100462756|ssc:100156205|ssc:100516161|ssc:397138|ssc:100511477|ssc:397143|ssc:100154443|ssc:100520595|…	100523751|100519402|100579141|100522678|100312974|100526240|396914|397054|100516892|100512501|100524702|100512194|733685|100627169|397324|100513376|100156145|100516581|100522261|100516661|100520950|399538|100462756|100156205|100516161|397138|100511477|397143|100154443|100520595|100524293|102159905|100626234|100524095|100525148|100519446|100521367|100157033|100524622|100157880|100521281|100522516|…	NDUFB5|ATP6V0A4|NDUFA4| |MAT2A, MATA2|NT5C|CRY, Cryl1, GulDH|DLAT|MTM1|INPP5A|PYCR2|PCYT1A|ALDH2|AGPS|ACACA|GMPPB| |PLCB4|PGM2| |NDUFA2|PRDX6, AOP2, PHGPX|INPP5K, SKIP|ALOX5|NDUFS4|FUT1|TRAK2|CBR1|NDUFA8|CTPS2|HSD17B10| | |PLD4|PLCB3|PLD1|SPR|POLR3H|NDUFA9|ATP5A1, ATP5A2|PAICS|GLYCTK|IMPAD1, IMPA3, gPAPP|B4GALT3| |RPA39|SMPD2|TBXAS1|NAMPT, PBEF1|CBR3|C1GALT1|ASNS|FUK|PAPSS2|PGAM1|DGKB|B4GALNT1|AC…	http://www.genome.jp/kegg-bin/show_pathway?ssc01100/ssc:100511477%09red/ssc:100312974%09red/ssc:448979%09red/ssc:100156145%09red/ssc:100514793%09red/ssc:100521659%09red/ssc:100520054%09red/ssc:100519402%09red/ssc:396914%09red/ssc:100154856%09red/ssc:100462756%09red/ssc:100516892%09red/ssc:100522678%09red/ssc:100520950%09red/ssc:100526233%09red/ssc:100522261%09red/ssc:100144468%09red/ssc:100156047…
Oxidative phosphorylation	KEGG PATHWAY	ssc00190	12	134	0.0295561	0.993602	ENSSSCG00000016516|ENSSSCG00000027085|ENSSSCG00000011764|ENSSSCG00000024313|ENSSSCG00000014371|ENSSSCG00000016893|ENSSSCG00000000905|ENSSSCG00000000719|ENSSSCG00000004499|ENSSSCG00000006166|ENSSSCG00000010735|ENSSSCG00000005528	ssc:100519402|ssc:100522678|ssc:100523751|ssc:100579141|ssc:100520950|ssc:100516161|ssc:100518016|ssc:100524622|ssc:100157880|ssc:448979|ssc:100156052|ssc:100154443|	100519402|100522678|100523751|100579141|100520950|100516161|100518016|100524622|100157880|448979|100156052|100154443|	ATP6V0A4| |NDUFB5|NDUFA4|NDUFA2|NDUFS4|NDUFA12|NDUFA9|ATP5A1, ATP5A2|NDUFB8|LHPP|NDUFA8|	http://www.genome.jp/kegg-bin/show_pathway?ssc00190/ssc:448979%09red/ssc:100518016%09red/ssc:100154443%09red/ssc:100519402%09red/ssc:100579141%09red/ssc:100522678%09red/ssc:100524622%09red/ssc:100523751%09red/ssc:100520950%09red/ssc:100156052%09red/ssc:100157880%09red/ssc:100516161%09red
Metabolism of xenobiotics by cytochrome P450	KEGG PATHWAY	ssc00980	6	49	0.0344245	0.993602	ENSSSCG00000012053|ENSSSCG00000002994|ENSSSCG00000016466|ENSSSCG00000010853|ENSSSCG00000020706|ENSSSCG00000003158	ssc:100512990|ssc:100523190|ssc:100521480|ssc:397639|ssc:397143|ssc:397337|	100512990|100523190|100521480|397639|397143|397337|	CBR3| |GSTK1|EPHX1|CBR1|SUS2DD, 2DD, DHDH|	http://www.genome.jp/kegg-bin/show_pathway?ssc00980/ssc:397143%09red/ssc:397639%09red/ssc:100512990%09red/ssc:100521480%09red/ssc:100523190%09red/ssc:397337%09red
Huntington's disease	KEGG PATHWAY	ssc05016	15	190	0.04035	0.993602	ENSSSCG00000011764|ENSSSCG00000027085|ENSSSCG00000026049|ENSSSCG00000003106|ENSSSCG00000024313|ENSSSCG00000014371|ENSSSCG00000013034|ENSSSCG00000016893|ENSSSCG00000000905|ENSSSCG00000000719|ENSSSCG00000004499|ENSSSCG00000006166|ENSSSCG00000022659|ENSSSCG00000007058|ENSSSCG00000005528	ssc:100523751|ssc:100522678|ssc:100626234|ssc:100514408|ssc:100579141|ssc:100520950|ssc:100525148|ssc:100516161|ssc:100518016|ssc:100524622|ssc:100157880|ssc:448979|ssc:100271929|ssc:100516581|ssc:100154443|	100523751|100522678|100626234|100514408|100579141|100520950|100525148|100516161|100518016|100524622|100157880|448979|100271929|100516581|100154443|	NDUFB5| | |AP2S1|NDUFA4|NDUFA2|PLCB3|NDUFS4|NDUFA12|NDUFA9|ATP5A1, ATP5A2|NDUFB8|CLTC|PLCB4|NDUFA8|	http://www.genome.jp/kegg-bin/show_pathway?ssc05016/ssc:100525148%09red/ssc:448979%09red/ssc:100271929%09red/ssc:100518016%09red/ssc:100154443%09red/ssc:100516581%09red/ssc:100626234%09red/ssc:100579141%09red/ssc:100522678%09red/ssc:100524622%09red/ssc:100523751%09red/ssc:100520950%09red/ssc:100514408%09red/ssc:100157880%09red/ssc:100516161%09red
Peroxisome	KEGG PATHWAY	ssc04146	8	80	0.0415891	0.993602	ENSSSCG00000023091|ENSSSCG00000027052|ENSSSCG00000013030|ENSSSCG00000023983|ENSSSCG00000016466|ENSSSCG00000029881|ENSSSCG00000012583|ENSSSCG00000002697	ssc:100154884|ssc:100157485|ssc:397273|ssc:100627169|ssc:100521480|ssc:100624129|ssc:448980|ssc:100519193|	100154884|100157485|397273|100627169|100521480|100624129|448980|100519193|	PEX19|PEX11A|PRDX5|AGPS|GSTK1| |ACSL4|NUDT7|	http://www.genome.jp/kegg-bin/show_pathway?ssc04146/ssc:448980%09red/ssc:100519193%09red/ssc:100627169%09red/ssc:100154884%09red/ssc:100521480%09red/ssc:397273%09red/ssc:100157485%09red/ssc:100624129%09red
RIG-I-like receptor signaling pathway	KEGG PATHWAY	ssc04622	7	68	0.0485569	0.993602	ENSSSCG00000002525|ENSSSCG00000015114|ENSSSCG00000017416|ENSSSCG00000013291|ENSSSCG00000026940|ENSSSCG00000030408|ENSSSCG00000005136	ssc:100156979|ssc:100518678|ssc:100524520|ssc:396629|ssc:100154896|ssc:396723|ssc:100125969|	100156979|100518678|100524520|396629|100154896|396723|100125969|	TRAF3, TRAF3_TV1|NLRX1|DHX58, LGP2|TRAF6|CASP10|DDX58, RHIV-1, RIG-1, RIG-I, RLR-1|IFNE, IFN-epsilon, IFNE1|	http://www.genome.jp/kegg-bin/show_pathway?ssc04622/ssc:100154896%09red/ssc:100156979%09red/ssc:396723%09red/ssc:100524520%09red/ssc:100518678%09red/ssc:100125969%09red/ssc:396629%09red
Lysosome	KEGG PATHWAY	ssc04142	10	115	0.0517106	0.993602	ENSSSCG00000003212|ENSSSCG00000017087|ENSSSCG00000001770|ENSSSCG00000025932|ENSSSCG00000010798|ENSSSCG00000010281|ENSSSCG00000016516|ENSSSCG00000008769|ENSSSCG00000003707|ENSSSCG00000022659	ssc:100525581|ssc:100515283|ssc:396969|ssc:100627432|ssc:100524333|ssc:100153167|ssc:100519402|ssc:100520753|ssc:397591|ssc:100271929|	100525581|100515283|396969|100627432|100524333|100153167|100519402|100520753|397591|100271929|	NAPSA|GM2A|CTSH| |GGA2|PSAP|ATP6V0A4|CD68_tv1, CD68_tv2|NPC1|CLTC|	http://www.genome.jp/kegg-bin/show_pathway?ssc04142/ssc:100627432%09red/ssc:100271929%09red/ssc:100515283%09red/ssc:100525581%09red/ssc:100524333%09red/ssc:100519402%09red/ssc:397591%09red/ssc:396969%09red/ssc:100153167%09red/ssc:100520753%09red
Parkinson's disease	KEGG PATHWAY	ssc05012	12	151	0.0597005	0.993602	ENSSSCG00000023379|ENSSSCG00000027085|ENSSSCG00000026049|ENSSSCG00000011764|ENSSSCG00000024313|ENSSSCG00000014371|ENSSSCG00000016893|ENSSSCG00000000905|ENSSSCG00000000719|ENSSSCG00000004499|ENSSSCG00000006166|ENSSSCG00000005528	ssc:100514753|ssc:100522678|ssc:100626234|ssc:100523751|ssc:100579141|ssc:100520950|ssc:100516161|ssc:100518016|ssc:100524622|ssc:100157880|ssc:448979|ssc:100154443|	100514753|100522678|100626234|100523751|100579141|100520950|100516161|100518016|100524622|100157880|448979|100154443|	UBE2L6| | |NDUFB5|NDUFA4|NDUFA2|NDUFS4|NDUFA12|NDUFA9|ATP5A1, ATP5A2|NDUFB8|NDUFA8|	http://www.genome.jp/kegg-bin/show_pathway?ssc05012/ssc:448979%09red/ssc:100518016%09red/ssc:100154443%09red/ssc:100514753%09red/ssc:100626234%09red/ssc:100579141%09red/ssc:100522678%09red/ssc:100524622%09red/ssc:100523751%09red/ssc:100520950%09red/ssc:100157880%09red/ssc:100516161%09red
Inositol phosphate metabolism	KEGG PATHWAY	ssc00562	6	57	0.0602037	0.993602	ENSSSCG00000010765|ENSSSCG00000007058|ENSSSCG00000013034|ENSSSCG00000012742|ENSSSCG00000030707|ENSSSCG00000006242	ssc:100512501|ssc:100516581|ssc:100525148|ssc:100516892|ssc:100462756|ssc:100156925|	100512501|100516581|100525148|100516892|100462756|100156925|	INPP5A|PLCB4|PLCB3|MTM1|INPP5K, SKIP|IMPAD1, IMPA3, gPAPP|	http://www.genome.jp/kegg-bin/show_pathway?ssc00562/ssc:100525148%09red/ssc:100516581%09red/ssc:100512501%09red/ssc:100462756%09red/ssc:100516892%09red/ssc:100156925%09red
Tuberculosis	KEGG PATHWAY	ssc05152	13	174	0.0739328	0.993602	ENSSSCG00000016516|ENSSSCG00000009123|ENSSSCG00000026049|ENSSSCG00000014338|ENSSSCG00000010872|ENSSSCG00000013291|ENSSSCG00000001469|ENSSSCG00000009002|ENSSSCG00000026638|ENSSSCG00000011038|ENSSSCG00000015037|ENSSSCG00000016057|ENSSSCG00000026940	ssc:100519402|ssc:397674|ssc:100626234|ssc:100521183|ssc:100513811|ssc:396629|ssc:100135050|ssc:396623|ssc:100125346|ssc:445003|ssc:397057|ssc:396655|ssc:100154896|	100519402|397674|100626234|100521183|100513811|396629|100135050|396623|100125346|445003|397057|396655|100154896|	ATP6V0A4|CAMK2D| |HSPA9|AKT3|TRAF6|SLA-DMB|TLR2|BCL10|MRC1, CLEC13D, CLEC13DL, MRC1L1|IL18, IL-18|STAT1|CASP10|	http://www.genome.jp/kegg-bin/show_pathway?ssc05152/ssc:100125346%09red/ssc:100513811%09red/ssc:100154896%09red/ssc:100626234%09red/ssc:100519402%09red/ssc:100521183%09red/ssc:396623%09red/ssc:397674%09red/ssc:396655%09red/ssc:100135050%09red/ssc:396629%09red/ssc:397057%09red/ssc:445003%09red
Non-alcoholic fatty liver disease (NAFLD)	KEGG PATHWAY	ssc04932	12	160	0.0818873	0.993602	ENSSSCG00000008208|ENSSSCG00000027085|ENSSSCG00000026049|ENSSSCG00000011764|ENSSSCG00000010872|ENSSSCG00000024313|ENSSSCG00000014371|ENSSSCG00000016893|ENSSSCG00000000905|ENSSSCG00000000719|ENSSSCG00000006166|ENSSSCG00000005528	ssc:100513348|ssc:100522678|ssc:100626234|ssc:100523751|ssc:100513811|ssc:100579141|ssc:100520950|ssc:100516161|ssc:100518016|ssc:100524622|ssc:448979|ssc:100154443|	100513348|100522678|100626234|100523751|100513811|100579141|100520950|100516161|100518016|100524622|448979|100154443|	EIF2AK3| | |NDUFB5|AKT3|NDUFA4|NDUFA2|NDUFS4|NDUFA12|NDUFA9|NDUFB8|NDUFA8|	http://www.genome.jp/kegg-bin/show_pathway?ssc04932/ssc:448979%09red/ssc:100518016%09red/ssc:100513811%09red/ssc:100154443%09red/ssc:100626234%09red/ssc:100579141%09red/ssc:100513348%09red/ssc:100524622%09red/ssc:100523751%09red/ssc:100520950%09red/ssc:100522678%09red/ssc:100516161%09red
Leishmaniasis	KEGG PATHWAY	ssc05140	6	63	0.0854428	0.993602	ENSSSCG00000012279|ENSSSCG00000015559|ENSSSCG00000013291|ENSSSCG00000001469|ENSSSCG00000009002|ENSSSCG00000016057	ssc:100522002|ssc:100142665|ssc:396629|ssc:100135050|ssc:396623|ssc:396655|	100522002|100142665|396629|100135050|396623|396655|	ELK1|NCF2|TRAF6|SLA-DMB|TLR2|STAT1|	http://www.genome.jp/kegg-bin/show_pathway?ssc05140/ssc:100522002%09red/ssc:100142665%09red/ssc:396623%09red/ssc:396655%09red/ssc:396629%09red/ssc:100135050%09red
Pancreatic cancer	KEGG PATHWAY	ssc05212	6	63	0.0854428	0.993602	ENSSSCG00000007268|ENSSSCG00000012275|ENSSSCG00000010872|ENSSSCG00000011226|ENSSSCG00000020742|ENSSSCG00000016057	ssc:100153846|ssc:397601|ssc:100513811|ssc:100038019|ssc:100519155|ssc:396655|	100153846|397601|100513811|100038019|100519155|396655|	E2F1|ARAF, ARAF1|AKT3| |RALBP1|STAT1|	http://www.genome.jp/kegg-bin/show_pathway?ssc05212/ssc:100153846%09red/ssc:397601%09red/ssc:100513811%09red/ssc:100038019%09red/ssc:396655%09red/ssc:100519155%09red
African trypanosomiasis	KEGG PATHWAY	ssc05143	4	34	0.0865921	0.993602	ENSSSCG00000015037|ENSSSCG00000007978|ENSSSCG00000007058|ENSSSCG00000013034	ssc:397057|ssc:100737768|ssc:100516581|ssc:100525148|	397057|100737768|100516581|100525148|	IL18, IL-18| |PLCB4|PLCB3|	http://www.genome.jp/kegg-bin/show_pathway?ssc05143/ssc:100525148%09red/ssc:100737768%09red/ssc:397057%09red/ssc:100516581%09red
Phosphatidylinositol signaling system	KEGG PATHWAY	ssc04070	7	79	0.0874561	0.993602	ENSSSCG00000010765|ENSSSCG00000007058|ENSSSCG00000021062|ENSSSCG00000013034|ENSSSCG00000012742|ENSSSCG00000030707|ENSSSCG00000006242	ssc:100512501|ssc:100516581|ssc:100625799|ssc:100525148|ssc:100516892|ssc:100462756|ssc:100156925|	100512501|100516581|100625799|100525148|100516892|100462756|100156925|	INPP5A|PLCB4|DGKB|PLCB3|MTM1|INPP5K, SKIP|IMPAD1, IMPA3, gPAPP|	http://www.genome.jp/kegg-bin/show_pathway?ssc04070/ssc:100525148%09red/ssc:100516581%09red/ssc:100512501%09red/ssc:100462756%09red/ssc:100516892%09red/ssc:100625799%09red/ssc:100156925%09red
Graft-versus-host disease	KEGG PATHWAY	ssc05332	4	35	0.0932718	0.993602	ENSSSCG00000011877|ENSSSCG00000001469|ENSSSCG00000028561|ENSSSCG00000001341	ssc:397441|ssc:100135050|ssc:100515419|ssc:100135031|	397441|100135050|100515419|100135031|	CD86|SLA-DMB|CD28|SLA-2, SLA-B|	http://www.genome.jp/kegg-bin/show_pathway?ssc05332/ssc:100515419%09red/ssc:397441%09red/ssc:100135031%09red/ssc:100135050%09red
Herpes simplex infection	KEGG PATHWAY	ssc05168	13	182	0.0948714	0.993602	ENSSSCG00000008208|ENSSSCG00000000396|ENSSSCG00000025593|ENSSSCG00000002525|ENSSSCG00000026049|ENSSSCG00000013291|ENSSSCG00000030408|ENSSSCG00000001469|ENSSSCG00000009002|ENSSSCG00000017705|ENSSSCG00000026714|ENSSSCG00000001341|ENSSSCG00000016057	ssc:100513348|ssc:396923|ssc:100519722|ssc:100156979|ssc:100626234|ssc:396629|ssc:396723|ssc:100135050|ssc:396623|ssc:396613|ssc:100516658|ssc:100135031|ssc:396655|	100513348|396923|100519722|100156979|100626234|396629|396723|100135050|396623|396613|100516658|100135031|396655|	EIF2AK3|STAT2|TAP2|TRAF3, TRAF3_TV1| |TRAF6|DDX58, RHIV-1, RIG-1, RIG-I, RLR-1|SLA-DMB|TLR2|CCL5, RANTES|TAF9B|SLA-2, SLA-B|STAT1|	http://www.genome.jp/kegg-bin/show_pathway?ssc05168/ssc:100519722%09red/ssc:100516658%09red/ssc:396723%09red/ssc:100626234%09red/ssc:396613%09red/ssc:100135031%09red/ssc:100513348%09red/ssc:396923%09red/ssc:396623%09red/ssc:396655%09red/ssc:396629%09red/ssc:100156979%09red/ssc:100135050%09red
Toxoplasmosis	KEGG PATHWAY	ssc05145	9	115	0.100608	0.993602	ENSSSCG00000024344|ENSSSCG00000026049|ENSSSCG00000010872|ENSSSCG00000013291|ENSSSCG00000029684|ENSSSCG00000001469|ENSSSCG00000009002|ENSSSCG00000010404|ENSSSCG00000016057	ssc:414371|ssc:100626234|ssc:100513811|ssc:396629|ssc:100154420|ssc:100135050|ssc:396623|ssc:100156205|ssc:396655|	414371|100626234|100513811|396629|100154420|100135050|396623|100156205|396655|	CCR5| |AKT3|TRAF6|LAMA2|SLA-DMB|TLR2|ALOX5|STAT1|	http://www.genome.jp/kegg-bin/show_pathway?ssc05145/ssc:100513811%09red/ssc:396629%09red/ssc:100626234%09red/ssc:414371%09red/ssc:396623%09red/ssc:100154420%09red/ssc:396655%09red/ssc:100156205%09red/ssc:100135050%09red
Measles	KEGG PATHWAY	ssc05162	10	133	0.104399	0.993602	ENSSSCG00000008208|ENSSSCG00000028561|ENSSSCG00000000396|ENSSSCG00000010872|ENSSSCG00000006543|ENSSSCG00000013291|ENSSSCG00000030408|ENSSSCG00000009002|ENSSSCG00000020906|ENSSSCG00000016057	ssc:100513348|ssc:100515419|ssc:396923|ssc:100513811|ssc:100523784|ssc:396629|ssc:396723|ssc:396623|ssc:406191|ssc:396655|	100513348|100515419|396923|100513811|100523784|396629|396723|396623|406191|396655|	EIF2AK3|CD28|STAT2|AKT3|ADAR|TRAF6|DDX58, RHIV-1, RIG-1, RIG-I, RLR-1|TLR2|TNFSF10, TRAIL|STAT1|	http://www.genome.jp/kegg-bin/show_pathway?ssc05162/ssc:100513811%09red/ssc:396629%09red/ssc:406191%09red/ssc:396723%09red/ssc:100513348%09red/ssc:100515419%09red/ssc:396923%09red/ssc:396623%09red/ssc:396655%09red/ssc:100523784%09red
Osteoclast differentiation	KEGG PATHWAY	ssc04380	10	133	0.104399	0.993602	ENSSSCG00000000396|ENSSSCG00000015559|ENSSSCG00000010872|ENSSSCG00000011226|ENSSSCG00000023497|ENSSSCG00000020913|ENSSSCG00000012495|ENSSSCG00000013291|ENSSSCG00000016057|ENSSSCG00000014016	ssc:396923|ssc:100142665|ssc:100513811|ssc:100038019|ssc:100515364|ssc:100622160|ssc:100627308|ssc:396629|ssc:396655|ssc:100518718|	396923|100142665|100513811|100038019|100515364|100622160|100627308|396629|396655|100518718|	STAT2|NCF2|AKT3| |CAMK4| |BTK|TRAF6|STAT1|SQSTM1|	http://www.genome.jp/kegg-bin/show_pathway?ssc04380/ssc:100515364%09red/ssc:100518718%09red/ssc:100513811%09red/ssc:100038019%09red/ssc:100142665%09red/ssc:100627308%09red/ssc:396923%09red/ssc:396655%09red/ssc:100622160%09red/ssc:396629%09red
Influenza A	KEGG PATHWAY	ssc05164	12	168	0.105453	0.993602	ENSSSCG00000008208|ENSSSCG00000006543|ENSSSCG00000000396|ENSSSCG00000026049|ENSSSCG00000010872|ENSSSCG00000015114|ENSSSCG00000030408|ENSSSCG00000001469|ENSSSCG00000020906|ENSSSCG00000017705|ENSSSCG00000015037|ENSSSCG00000016057	ssc:100513348|ssc:100523784|ssc:396923|ssc:100626234|ssc:100513811|ssc:100518678|ssc:396723|ssc:100135050|ssc:406191|ssc:396613|ssc:397057|ssc:396655|	100513348|100523784|396923|100626234|100513811|100518678|396723|100135050|406191|396613|397057|396655|	EIF2AK3|ADAR|STAT2| |AKT3|NLRX1|DDX58, RHIV-1, RIG-1, RIG-I, RLR-1|SLA-DMB|TNFSF10, TRAIL|CCL5, RANTES|IL18, IL-18|STAT1|	http://www.genome.jp/kegg-bin/show_pathway?ssc05164/ssc:396723%09red/ssc:100513811%09red/ssc:100626234%09red/ssc:396613%09red/ssc:100518678%09red/ssc:100513348%09red/ssc:406191%09red/ssc:396923%09red/ssc:396655%09red/ssc:100523784%09red/ssc:397057%09red/ssc:100135050%09red
Colorectal cancer	KEGG PATHWAY	ssc05210	6	68	0.110283	0.993602	ENSSSCG00000026049|ENSSSCG00000008428|ENSSSCG00000012275|ENSSSCG00000010872|ENSSSCG00000011226|ENSSSCG00000014126	ssc:100626234|ssc:100337661|ssc:397601|ssc:100513811|ssc:100038019|ssc:100512158|	100626234|100337661|397601|100513811|100038019|100512158|	|MSH2|ARAF, ARAF1|AKT3| |MSH3|	http://www.genome.jp/kegg-bin/show_pathway?ssc05210/ssc:100337661%09red/ssc:397601%09red/ssc:100513811%09red/ssc:100512158%09red/ssc:100626234%09red/ssc:100038019%09red
Endocytosis	KEGG PATHWAY	ssc04144	14	206	0.113045	0.993602	ENSSSCG00000012160|ENSSSCG00000017167|ENSSSCG00000024344|ENSSSCG00000011237|ENSSSCG00000020666|ENSSSCG00000003106|ENSSSCG00000027209|ENSSSCG00000011226|ENSSSCG00000001341|ENSSSCG00000011750|ENSSSCG00000010192|ENSSSCG00000013291|ENSSSCG00000015688|ENSSSCG00000022659	ssc:100522530|ssc:100240721|ssc:414371|ssc:100512811|ssc:100738234|ssc:100514408|ssc:100623422|ssc:100038019|ssc:100135031|ssc:100519446|ssc:100154662|ssc:396629|ssc:396659|ssc:100271929|	100522530|100240721|414371|100512811|100738234|100514408|100623422|100038019|100135031|100519446|100154662|396629|396659|100271929|	SH3KBP1|CYTH2|CCR5|PDCD6IP|EHD4|AP2S1|ACAP1| |SLA-2, SLA-B|PLD1|RAB4A|TRAF6|CXCR4|CLTC|	http://www.genome.jp/kegg-bin/show_pathway?ssc04144/ssc:100623422%09red/ssc:100271929%09red/ssc:100519446%09red/ssc:100738234%09red/ssc:100135031%09red/ssc:414371%09red/ssc:100038019%09red/ssc:100154662%09red/ssc:396659%09red/ssc:100512811%09red/ssc:100514408%09red/ssc:396629%09red/ssc:100240721%09red/ssc:100522530%09red
Allograft rejection	KEGG PATHWAY	ssc05330	4	38	0.114701	0.993602	ENSSSCG00000011877|ENSSSCG00000001469|ENSSSCG00000028561|ENSSSCG00000001341	ssc:397441|ssc:100135050|ssc:100515419|ssc:100135031|	397441|100135050|100515419|100135031|	CD86|SLA-DMB|CD28|SLA-2, SLA-B|	http://www.genome.jp/kegg-bin/show_pathway?ssc05330/ssc:100515419%09red/ssc:397441%09red/ssc:100135031%09red/ssc:100135050%09red
Mismatch repair	KEGG PATHWAY	ssc03430	3	24	0.116047	0.993602	ENSSSCG00000008428|ENSSSCG00000016488|ENSSSCG00000014126	ssc:100337661|ssc:100512994|ssc:100512158|	100337661|100512994|100512158|	MSH2|SSBP1|MSH3|	http://www.genome.jp/kegg-bin/show_pathway?ssc03430/ssc:100512158%09red/ssc:100337661%09red/ssc:100512994%09red
Rheumatoid arthritis	KEGG PATHWAY	ssc05323	7	87	0.124268	0.993602	ENSSSCG00000028561|ENSSSCG00000017705|ENSSSCG00000011877|ENSSSCG00000001469|ENSSSCG00000009002|ENSSSCG00000016516|ENSSSCG00000015037	ssc:100515419|ssc:396613|ssc:397441|ssc:100135050|ssc:396623|ssc:100519402|ssc:397057|	100515419|396613|397441|100135050|396623|100519402|397057|	CD28|CCL5, RANTES|CD86|SLA-DMB|TLR2|ATP6V0A4|IL18, IL-18|	http://www.genome.jp/kegg-bin/show_pathway?ssc05323/ssc:397057%09red/ssc:396613%09red/ssc:100519402%09red/ssc:100515419%09red/ssc:396623%09red/ssc:397441%09red/ssc:100135050%09red
Nicotinate and nicotinamide metabolism	KEGG PATHWAY	ssc00760	3	25	0.125912	0.993602	ENSSSCG00000028210|ENSSSCG00000015435|ENSSSCG00000012859	ssc:100526240|ssc:595123|ssc:100516661|	100526240|595123|100516661|	NT5C|NAMPT, PBEF1| |	http://www.genome.jp/kegg-bin/show_pathway?ssc00760/ssc:100526240%09red/ssc:595123%09red/ssc:100516661%09red
Pentose and glucuronate interconversions	KEGG PATHWAY	ssc00040	3	26	0.136064	0.993602	ENSSSCG00000009889|ENSSSCG00000003158|ENSSSCG00000009268	ssc:733685|ssc:397337|ssc:396914|	733685|397337|396914|	ALDH2|SUS2DD, 2DD, DHDH|CRY, Cryl1, GulDH|	http://www.genome.jp/kegg-bin/show_pathway?ssc00040/ssc:396914%09red/ssc:397337%09red/ssc:733685%09red
Fatty acid biosynthesis	KEGG PATHWAY	ssc00061	2	13	0.141262	0.993602	ENSSSCG00000017695|ENSSSCG00000012583	ssc:397324|ssc:448980|	397324|448980|	ACACA|ACSL4|	http://www.genome.jp/kegg-bin/show_pathway?ssc00061/ssc:448980%09red/ssc:397324%09red
Chagas disease (American trypanosomiasis)	KEGG PATHWAY	ssc05142	8	108	0.144197	0.993602	ENSSSCG00000017705|ENSSSCG00000010872|ENSSSCG00000013291|ENSSSCG00000013034|ENSSSCG00000006309|ENSSSCG00000009002|ENSSSCG00000011226|ENSSSCG00000007058	ssc:396613|ssc:100513811|ssc:396629|ssc:100525148|ssc:397302|ssc:396623|ssc:100038019|ssc:100516581|	396613|100513811|396629|100525148|397302|396623|100038019|100516581|	CCL5, RANTES|AKT3|TRAF6|PLCB3|CD247, CD3Z|TLR2| |PLCB4|	http://www.genome.jp/kegg-bin/show_pathway?ssc05142/ssc:100525148%09red/ssc:100513811%09red/ssc:100516581%09red/ssc:396613%09red/ssc:100038019%09red/ssc:396623%09red/ssc:397302%09red/ssc:396629%09red
Type I diabetes mellitus	KEGG PATHWAY	ssc04940	4	42	0.146247	0.993602	ENSSSCG00000011877|ENSSSCG00000001469|ENSSSCG00000028561|ENSSSCG00000001341	ssc:397441|ssc:100135050|ssc:100515419|ssc:100135031|	397441|100135050|100515419|100135031|	CD86|SLA-DMB|CD28|SLA-2, SLA-B|	http://www.genome.jp/kegg-bin/show_pathway?ssc04940/ssc:100515419%09red/ssc:397441%09red/ssc:100135031%09red/ssc:100135050%09red
Endocrine and other factor-regulated calcium reabsorption	KEGG PATHWAY	ssc04961	4	42	0.146247	0.993602	ENSSSCG00000007058|ENSSSCG00000022659|ENSSSCG00000003106|ENSSSCG00000013034	ssc:100516581|ssc:100271929|ssc:100514408|ssc:100525148|	100516581|100271929|100514408|100525148|	PLCB4|CLTC|AP2S1|PLCB3|	http://www.genome.jp/kegg-bin/show_pathway?ssc04961/ssc:100525148%09red/ssc:100514408%09red/ssc:100271929%09red/ssc:100516581%09red
Intestinal immune network for IgA production	KEGG PATHWAY	ssc04672	4	44	0.163152	0.993602	ENSSSCG00000011877|ENSSSCG00000001469|ENSSSCG00000028561|ENSSSCG00000015688	ssc:397441|ssc:100135050|ssc:100515419|ssc:396659|	397441|100135050|100515419|396659|	CD86|SLA-DMB|CD28|CXCR4|	http://www.genome.jp/kegg-bin/show_pathway?ssc04672/ssc:100515419%09red/ssc:397441%09red/ssc:396659%09red/ssc:100135050%09red
Fructose and mannose metabolism	KEGG PATHWAY	ssc00051	3	29	0.168059	0.993602	ENSSSCG00000025425|ENSSSCG00000011133|ENSSSCG00000011389	ssc:100625448|ssc:100516289|ssc:100513376|	100625448|100516289|100513376|	FUK| |GMPPB|	http://www.genome.jp/kegg-bin/show_pathway?ssc00051/ssc:100625448%09red/ssc:100516289%09red/ssc:100513376%09red
Arachidonic acid metabolism	KEGG PATHWAY	ssc00590	5	62	0.176188	0.993602	ENSSSCG00000020706|ENSSSCG00000016503|ENSSSCG00000010404|ENSSSCG00000012053|ENSSSCG00000005688	ssc:397143|ssc:397112|ssc:100156205|ssc:100512990|ssc:654407|	397143|397112|100156205|100512990|654407|	CBR1|TBXAS1|ALOX5|CBR3|PTGES|	http://www.genome.jp/kegg-bin/show_pathway?ssc00590/ssc:100156205%09red/ssc:654407%09red/ssc:397143%09red/ssc:100512990%09red/ssc:397112%09red
Insulin signaling pathway	KEGG PATHWAY	ssc04910	9	133	0.180589	0.993602	ENSSSCG00000017695|ENSSSCG00000021281|ENSSSCG00000017259|ENSSSCG00000012279|ENSSSCG00000012275|ENSSSCG00000010872|ENSSSCG00000003898|ENSSSCG00000003018|ENSSSCG00000012411	ssc:397324|ssc:100520177|ssc:397091|ssc:100522002|ssc:397601|ssc:100513811|ssc:100233194|ssc:397583|ssc:100525092|	397324|100520177|397091|100522002|397601|100513811|100233194|397583|100525092|	ACACA|TRIP10|PRKAR1A|ELK1|ARAF, ARAF1|AKT3|MKNK1|LIPE, HSL| |	http://www.genome.jp/kegg-bin/show_pathway?ssc04910/ssc:100522002%09red/ssc:100525092%09red/ssc:100233194%09red/ssc:100513811%09red/ssc:397091%09red/ssc:397583%09red/ssc:397324%09red/ssc:100520177%09red/ssc:397601%09red
Valine, leucine and isoleucine degradation	KEGG PATHWAY	ssc00280	4	46	0.180719	0.993602	ENSSSCG00000009889|ENSSSCG00000003139|ENSSSCG00000012327|ENSSSCG00000004774	ssc:733685|ssc:396841|ssc:100524293|ssc:100156047|	733685|396841|100524293|100156047|	ALDH2|BCAT2, BCATM|HSD17B10|IVD|	http://www.genome.jp/kegg-bin/show_pathway?ssc00280/ssc:100524293%09red/ssc:100156047%09red/ssc:396841%09red/ssc:733685%09red
Viral myocarditis	KEGG PATHWAY	ssc05416	5	63	0.183752	0.993602	ENSSSCG00000011877|ENSSSCG00000001341|ENSSSCG00000001469|ENSSSCG00000028561|ENSSSCG00000026049	ssc:397441|ssc:100135031|ssc:100135050|ssc:100515419|ssc:100626234|	397441|100135031|100135050|100515419|100626234|	CD86|SLA-2, SLA-B|SLA-DMB|CD28| |	http://www.genome.jp/kegg-bin/show_pathway?ssc05416/ssc:100515419%09red/ssc:100626234%09red/ssc:397441%09red/ssc:100135031%09red/ssc:100135050%09red
Pyrimidine metabolism	KEGG PATHWAY	ssc00240	7	101	0.204066	0.993602	ENSSSCG00000012146|ENSSSCG00000023003|ENSSSCG00000028210|ENSSSCG00000030388|ENSSSCG00000010497|ENSSSCG00000000063|ENSSSCG00000028007	ssc:100520595|ssc:102159905|ssc:100526240|ssc:100625277|ssc:397298|ssc:100157033|ssc:414414|	100520595|102159905|100526240|100625277|397298|100157033|414414|	CTPS2| |NT5C| |ENTPD1, CD39|POLR3H|RPA39|	http://www.genome.jp/kegg-bin/show_pathway?ssc00240/ssc:100625277%09red/ssc:102159905%09red/ssc:100520595%09red/ssc:100526240%09red/ssc:100157033%09red/ssc:397298%09red/ssc:414414%09red
Toll-like receptor signaling pathway	KEGG PATHWAY	ssc04620	7	101	0.204066	0.993602	ENSSSCG00000011877|ENSSSCG00000017705|ENSSSCG00000002525|ENSSSCG00000010872|ENSSSCG00000013291|ENSSSCG00000009002|ENSSSCG00000016057	ssc:397441|ssc:396613|ssc:100156979|ssc:100513811|ssc:396629|ssc:396623|ssc:396655|	397441|396613|100156979|100513811|396629|396623|396655|	CD86|CCL5, RANTES|TRAF3, TRAF3_TV1|AKT3|TRAF6|TLR2|STAT1|	http://www.genome.jp/kegg-bin/show_pathway?ssc04620/ssc:100513811%09red/ssc:100156979%09red/ssc:396613%09red/ssc:396623%09red/ssc:396655%09red/ssc:397441%09red/ssc:396629%09red
Amino sugar and nucleotide sugar metabolism	KEGG PATHWAY	ssc00520	4	49	0.208156	0.993602	ENSSSCG00000025425|ENSSSCG00000008316|ENSSSCG00000011389|ENSSSCG00000008773	ssc:100625448|ssc:100523729|ssc:100513376|ssc:100522261|	100625448|100523729|100513376|100522261|	FUK|NAGK|GMPPB|PGM2|	http://www.genome.jp/kegg-bin/show_pathway?ssc00520/ssc:100625448%09red/ssc:100523729%09red/ssc:100513376%09red/ssc:100522261%09red
Pantothenate and CoA biosynthesis	KEGG PATHWAY	ssc00770	2	18	0.222007	0.993602	ENSSSCG00000007142|ENSSSCG00000003139	ssc:100520054|ssc:396841|	100520054|396841|	PANK2|BCAT2, BCATM|	http://www.genome.jp/kegg-bin/show_pathway?ssc00770/ssc:100520054%09red/ssc:396841%09red
Long-term potentiation	KEGG PATHWAY	ssc04720	5	68	0.223214	0.993602	ENSSSCG00000023497|ENSSSCG00000012275|ENSSSCG00000007058|ENSSSCG00000009123|ENSSSCG00000013034	ssc:100515364|ssc:397601|ssc:100516581|ssc:397674|ssc:100525148|	100515364|397601|100516581|397674|100525148|	CAMK4|ARAF, ARAF1|PLCB4|CAMK2D|PLCB3|	http://www.genome.jp/kegg-bin/show_pathway?ssc04720/ssc:100525148%09red/ssc:397674%09red/ssc:100515364%09red/ssc:397601%09red/ssc:100516581%09red
RNA polymerase	KEGG PATHWAY	ssc03020	3	34	0.225366	0.993602	ENSSSCG00000000063|ENSSSCG00000023003|ENSSSCG00000028007	ssc:100157033|ssc:102159905|ssc:414414|	100157033|102159905|414414|	POLR3H| |RPA39|	http://www.genome.jp/kegg-bin/show_pathway?ssc03020/ssc:102159905%09red/ssc:414414%09red/ssc:100157033%09red
Autoimmune thyroid disease	KEGG PATHWAY	ssc05320	4	51	0.227066	0.993602	ENSSSCG00000011877|ENSSSCG00000001469|ENSSSCG00000028561|ENSSSCG00000001341	ssc:397441|ssc:100135050|ssc:100515419|ssc:100135031|	397441|100135050|100515419|100135031|	CD86|SLA-DMB|CD28|SLA-2, SLA-B|	http://www.genome.jp/kegg-bin/show_pathway?ssc05320/ssc:100515419%09red/ssc:397441%09red/ssc:100135031%09red/ssc:100135050%09red
Non-small cell lung cancer	KEGG PATHWAY	ssc05223	4	52	0.23668	0.993602	ENSSSCG00000007268|ENSSSCG00000012275|ENSSSCG00000010872|ENSSSCG00000015647	ssc:100153846|ssc:397601|ssc:100513811|ssc:100521638|	100153846|397601|100513811|100521638|	E2F1|ARAF, ARAF1|AKT3|RASSF5|	http://www.genome.jp/kegg-bin/show_pathway?ssc05223/ssc:100153846%09red/ssc:100521638%09red/ssc:397601%09red/ssc:100513811%09red
Phenylalanine metabolism	KEGG PATHWAY	ssc00360	2	19	0.238644	0.993602	ENSSSCG00000010067|ENSSSCG00000022742	ssc:397412|ssc:399538|	397412|399538|	MIF|PRDX6, AOP2, PHGPX|	http://www.genome.jp/kegg-bin/show_pathway?ssc00360/ssc:399538%09red/ssc:397412%09red
Small cell lung cancer	KEGG PATHWAY	ssc05222	6	88	0.23898	0.993602	ENSSSCG00000007268|ENSSSCG00000002525|ENSSSCG00000026049|ENSSSCG00000010872|ENSSSCG00000013291|ENSSSCG00000029684	ssc:100153846|ssc:100156979|ssc:100626234|ssc:100513811|ssc:396629|ssc:100154420|	100153846|100156979|100626234|100513811|396629|100154420|	E2F1|TRAF3, TRAF3_TV1| |AKT3|TRAF6|LAMA2|	http://www.genome.jp/kegg-bin/show_pathway?ssc05222/ssc:100153846%09red/ssc:100513811%09red/ssc:100626234%09red/ssc:100154420%09red/ssc:396629%09red/ssc:100156979%09red
Adherens junction	KEGG PATHWAY	ssc04520	5	71	0.248012	0.993602	ENSSSCG00000017756|ENSSSCG00000030072|ENSSSCG00000006368|ENSSSCG00000011226|ENSSSCG00000029947	ssc:100620270|ssc:100157656|ssc:100154054|ssc:100038019|ssc:100737414|	100620270|100157656|100154054|100038019|100737414|	|IQGAP1|PVRL4| | |	http://www.genome.jp/kegg-bin/show_pathway?ssc04520/ssc:100737414%09red/ssc:100620270%09red/ssc:100038019%09red/ssc:100154054%09red/ssc:100157656%09red
SNARE interactions in vesicular transport	KEGG PATHWAY	ssc04130	3	36	0.24926	0.993602	ENSSSCG00000022820|ENSSSCG00000030183|ENSSSCG00000007516	ssc:100620246|ssc:100519332|ssc:100144526|	100620246|100519332|100144526|	VAMP8|GOSR2|STX16|	http://www.genome.jp/kegg-bin/show_pathway?ssc04130/ssc:100144526%09red/ssc:100519332%09red/ssc:100620246%09red
Hepatitis C	KEGG PATHWAY	ssc05160	8	127	0.251359	0.993602	ENSSSCG00000008208|ENSSSCG00000000396|ENSSSCG00000002525|ENSSSCG00000012275|ENSSSCG00000010872|ENSSSCG00000013291|ENSSSCG00000030408|ENSSSCG00000016057	ssc:100513348|ssc:396923|ssc:100156979|ssc:397601|ssc:100513811|ssc:396629|ssc:396723|ssc:396655|	100513348|396923|100156979|397601|100513811|396629|396723|396655|	EIF2AK3|STAT2|TRAF3, TRAF3_TV1|ARAF, ARAF1|AKT3|TRAF6|DDX58, RHIV-1, RIG-1, RIG-I, RLR-1|STAT1|	http://www.genome.jp/kegg-bin/show_pathway?ssc05160/ssc:397601%09red/ssc:100513811%09red/ssc:100156979%09red/ssc:396723%09red/ssc:100513348%09red/ssc:396923%09red/ssc:396655%09red/ssc:396629%09red
Glycolysis / Gluconeogenesis	KEGG PATHWAY	ssc00010	4	54	0.256181	0.993602	ENSSSCG00000009889|ENSSSCG00000010517|ENSSSCG00000015030|ENSSSCG00000008773	ssc:733685|ssc:100154776|ssc:397054|ssc:100522261|	733685|100154776|397054|100522261|	ALDH2|PGAM1|DLAT|PGM2|	http://www.genome.jp/kegg-bin/show_pathway?ssc00010/ssc:397054%09red/ssc:100522261%09red/ssc:100154776%09red/ssc:733685%09red
B cell receptor signaling pathway	KEGG PATHWAY	ssc04662	5	72	0.256431	0.993602	ENSSSCG00000026638|ENSSSCG00000012495|ENSSSCG00000010872|ENSSSCG00000005743|ENSSSCG00000010509	ssc:100125346|ssc:100627308|ssc:100513811|ssc:100151931|ssc:100155165|	100125346|100627308|100513811|100151931|100155165|	BCL10|BTK|AKT3|VAV2|PIK3AP1|	http://www.genome.jp/kegg-bin/show_pathway?ssc04662/ssc:100125346%09red/ssc:100627308%09red/ssc:100155165%09red/ssc:100513811%09red/ssc:100151931%09red
Pyruvate metabolism	KEGG PATHWAY	ssc00620	3	37	0.261347	0.993602	ENSSSCG00000009889|ENSSSCG00000017695|ENSSSCG00000015030	ssc:733685|ssc:397324|ssc:397054|	733685|397324|397054|	ALDH2|ACACA|DLAT|	http://www.genome.jp/kegg-bin/show_pathway?ssc00620/ssc:397054%09red/ssc:397324%09red/ssc:733685%09red
Epstein-Barr virus infection	KEGG PATHWAY	ssc05169	11	189	0.275997	0.993602	ENSSSCG00000008208|ENSSSCG00000002525|ENSSSCG00000023003|ENSSSCG00000013297|ENSSSCG00000010872|ENSSSCG00000013291|ENSSSCG00000010497|ENSSSCG00000000063|ENSSSCG00000001341|ENSSSCG00000030408|ENSSSCG00000028007	ssc:100513348|ssc:100156979|ssc:102159905|ssc:100525150|ssc:100513811|ssc:396629|ssc:397298|ssc:100157033|ssc:100135031|ssc:396723|ssc:414414|	100513348|100156979|102159905|100525150|100513811|396629|397298|100157033|100135031|396723|414414|	EIF2AK3|TRAF3, TRAF3_TV1| |CD44|AKT3|TRAF6|ENTPD1, CD39|POLR3H|SLA-2, SLA-B|DDX58, RHIV-1, RIG-1, RIG-I, RLR-1|RPA39|	http://www.genome.jp/kegg-bin/show_pathway?ssc05169/ssc:100513811%09red/ssc:100135031%09red/ssc:100156979%09red/ssc:396723%09red/ssc:102159905%09red/ssc:100513348%09red/ssc:100157033%09red/ssc:397298%09red/ssc:100525150%09red/ssc:396629%09red/ssc:414414%09red
Hepatitis B	KEGG PATHWAY	ssc05161	9	151	0.281146	0.993602	ENSSSCG00000007268|ENSSSCG00000000396|ENSSSCG00000026049|ENSSSCG00000012279|ENSSSCG00000010872|ENSSSCG00000030408|ENSSSCG00000009002|ENSSSCG00000016057|ENSSSCG00000026940	ssc:100153846|ssc:396923|ssc:100626234|ssc:100522002|ssc:100513811|ssc:396723|ssc:396623|ssc:396655|ssc:100154896|	100153846|396923|100626234|100522002|100513811|396723|396623|396655|100154896|	E2F1|STAT2| |ELK1|AKT3|DDX58, RHIV-1, RIG-1, RIG-I, RLR-1|TLR2|STAT1|CASP10|	http://www.genome.jp/kegg-bin/show_pathway?ssc05161/ssc:100522002%09red/ssc:100513811%09red/ssc:100154896%09red/ssc:100626234%09red/ssc:396723%09red/ssc:100153846%09red/ssc:396923%09red/ssc:396623%09red/ssc:396655%09red
Ether lipid metabolism	KEGG PATHWAY	ssc00565	3	41	0.310265	0.993602	ENSSSCG00000011750|ENSSSCG00000002554|ENSSSCG00000023983	ssc:100519446|ssc:100524095|ssc:100627169|	100519446|100524095|100627169|	PLD1|PLD4|AGPS|	http://www.genome.jp/kegg-bin/show_pathway?ssc00565/ssc:100524095%09red/ssc:100627169%09red/ssc:100519446%09red
Chemical carcinogenesis	KEGG PATHWAY	ssc05204	4	60	0.316246	0.993602	ENSSSCG00000023320|ENSSSCG00000020706|ENSSSCG00000010853|ENSSSCG00000016466	ssc:100144468|ssc:397143|ssc:397639|ssc:100521480|	100144468|397143|397639|100521480|	CYP3A22|CBR1|EPHX1|GSTK1|	http://www.genome.jp/kegg-bin/show_pathway?ssc05204/ssc:397639%09red/ssc:397143%09red/ssc:100521480%09red/ssc:100144468%09red
Glycosaminoglycan biosynthesis - heparan sulfate / heparin	KEGG PATHWAY	ssc00534	2	24	0.321976	0.993602	ENSSSCG00000006861|ENSSSCG00000017573	ssc:100155305|ssc:100514793|	100155305|100514793|	EXTL2|XYLT2|	http://www.genome.jp/kegg-bin/show_pathway?ssc00534/ssc:100155305%09red/ssc:100514793%09red
Asthma	KEGG PATHWAY	ssc05310	2	24	0.321976	0.993602	ENSSSCG00000006413|ENSSSCG00000001469	ssc:100152827|ssc:100135050|	100152827|100135050|	FCER1A|SLA-DMB|	http://www.genome.jp/kegg-bin/show_pathway?ssc05310/ssc:100152827%09red/ssc:100135050%09red
Basal transcription factors	KEGG PATHWAY	ssc03022	3	42	0.322565	0.993602	ENSSSCG00000001383|ENSSSCG00000026714|ENSSSCG00000022224	ssc:100144458|ssc:100516658|ssc:100524570|	100144458|100516658|100524570|	GTF2H4, TFIIH|TAF9B|TAF8|	http://www.genome.jp/kegg-bin/show_pathway?ssc03022/ssc:100516658%09red/ssc:100144458%09red/ssc:100524570%09red
Glioma	KEGG PATHWAY	ssc05214	4	61	0.326397	0.993602	ENSSSCG00000007268|ENSSSCG00000012275|ENSSSCG00000010872|ENSSSCG00000009123	ssc:100153846|ssc:397601|ssc:100513811|ssc:397674|	100153846|397601|100513811|397674|	E2F1|ARAF, ARAF1|AKT3|CAMK2D|	http://www.genome.jp/kegg-bin/show_pathway?ssc05214/ssc:397674%09red/ssc:100153846%09red/ssc:397601%09red/ssc:100513811%09red
Inflammatory bowel disease (IBD)	KEGG PATHWAY	ssc05321	4	62	0.336568	0.993602	ENSSSCG00000015037|ENSSSCG00000009002|ENSSSCG00000001469|ENSSSCG00000016057	ssc:397057|ssc:396623|ssc:100135050|ssc:396655|	397057|396623|100135050|396655|	IL18, IL-18|TLR2|SLA-DMB|STAT1|	http://www.genome.jp/kegg-bin/show_pathway?ssc05321/ssc:396655%09red/ssc:397057%09red/ssc:396623%09red/ssc:100135050%09red
Biosynthesis of amino acids	KEGG PATHWAY	ssc01230	4	63	0.346751	0.993602	ENSSSCG00000003139|ENSSSCG00000010517|ENSSSCG00000010855|ENSSSCG00000022300	ssc:396841|ssc:100154776|ssc:100524702|ssc:100312974|	396841|100154776|100524702|100312974|	BCAT2, BCATM|PGAM1|PYCR2|MAT2A, MATA2|	http://www.genome.jp/kegg-bin/show_pathway?ssc01230/ssc:100312974%09red/ssc:100524702%09red/ssc:396841%09red/ssc:100154776%09red
Fc epsilon RI signaling pathway	KEGG PATHWAY	ssc04664	4	63	0.346751	0.993602	ENSSSCG00000006413|ENSSSCG00000012495|ENSSSCG00000010872|ENSSSCG00000005743	ssc:100152827|ssc:100627308|ssc:100513811|ssc:100151931|	100152827|100627308|100513811|100151931|	FCER1A|BTK|AKT3|VAV2|	http://www.genome.jp/kegg-bin/show_pathway?ssc04664/ssc:100627308%09red/ssc:100513811%09red/ssc:100152827%09red/ssc:100151931%09red
Notch signaling pathway	KEGG PATHWAY	ssc04330	3	44	0.347156	0.993602	ENSSSCG00000011876|ENSSSCG00000010860|ENSSSCG00000006385	ssc:100520459|ssc:780410|ssc:100156098|	100520459|780410|100156098|	DTX3L|PSEN2, PS-2|NCSTN|	http://www.genome.jp/kegg-bin/show_pathway?ssc04330/ssc:100520459%09red/ssc:100156098%09red/ssc:780410%09red
Calcium signaling pathway	KEGG PATHWAY	ssc04020	10	182	0.348229	0.993602	ENSSSCG00000011441|ENSSSCG00000007058|ENSSSCG00000009123|ENSSSCG00000006030|ENSSSCG00000029344|ENSSSCG00000013034|ENSSSCG00000029567|ENSSSCG00000020941|ENSSSCG00000023497|ENSSSCG00000012411	ssc:100156435|ssc:100516581|ssc:397674|ssc:100415777|ssc:100621531|ssc:100525148|ssc:100519030|ssc:100156094|ssc:100515364|ssc:100525092|	100156435|100516581|397674|100415777|100621531|100525148|100519030|100156094|100515364|100525092|	TNNC1, TNNC|PLCB4|CAMK2D|TRHR| |PLCB3|SLC8A2|LTB4R2|CAMK4| |	http://www.genome.jp/kegg-bin/show_pathway?ssc04020/ssc:100415777%09red/ssc:100525148%09red/ssc:100515364%09red/ssc:100525092%09red/ssc:100519030%09red/ssc:100156094%09red/ssc:100516581%09red/ssc:100621531%09red/ssc:100156435%09red/ssc:397674%09red
Purine metabolism	KEGG PATHWAY	ssc00230	10	183	0.354159	0.993602	ENSSSCG00000023003|ENSSSCG00000028210|ENSSSCG00000029344|ENSSSCG00000010497|ENSSSCG00000000063|ENSSSCG00000010437|ENSSSCG00000008901|ENSSSCG00000008773|ENSSSCG00000011113|ENSSSCG00000028007	ssc:102159905|ssc:100526240|ssc:100621531|ssc:397298|ssc:100157033|ssc:100156262|ssc:100521281|ssc:100522261|ssc:100511529|ssc:414414|	102159905|100526240|100621531|397298|100157033|100156262|100521281|100522261|100511529|414414|	|NT5C| |ENTPD1, CD39|POLR3H|PAPSS2|PAICS|PGM2|NUDT5|RPA39|	http://www.genome.jp/kegg-bin/show_pathway?ssc00230/ssc:100156262%09red/ssc:100511529%09red/ssc:102159905%09red/ssc:100621531%09red/ssc:100526240%09red/ssc:100522261%09red/ssc:100157033%09red/ssc:397298%09red/ssc:100521281%09red/ssc:414414%09red
Glycosphingolipid biosynthesis - lacto and neolacto series	KEGG PATHWAY	ssc00601	2	26	0.3548	0.993602	ENSSSCG00000006360|ENSSSCG00000003141	ssc:100154856|ssc:397138|	100154856|397138|	B4GALT3|FUT1|	http://www.genome.jp/kegg-bin/show_pathway?ssc00601/ssc:397138%09red/ssc:100154856%09red
Ribosome	KEGG PATHWAY	ssc03010	8	143	0.355872	0.993602	ENSSSCG00000005595|ENSSSCG00000005001|ENSSSCG00000005003|ENSSSCG00000029623|ENSSSCG00000022842|ENSSSCG00000017509|ENSSSCG00000030578|ENSSSCG00000008113	ssc:397598|ssc:100514266|ssc:414391|ssc:414419|ssc:100525692|ssc:396989|ssc:100155047|ssc:100521262|	397598|100514266|414391|414419|100525692|396989|100155047|100521262|	RPL35| |RPS29|RPL32| |RPL19|MRPL15|MRPS5|	http://www.genome.jp/kegg-bin/show_pathway?ssc03010/ssc:100525692%09red/ssc:414391%09red/ssc:414419%09red/ssc:100514266%09red/ssc:397598%09red/ssc:396989%09red/ssc:100521262%09red/ssc:100155047%09red
Legionellosis	KEGG PATHWAY	ssc05134	4	64	0.356939	0.993602	ENSSSCG00000015037|ENSSSCG00000009002|ENSSSCG00000024388|ENSSSCG00000026049	ssc:397057|ssc:396623|ssc:100624868|ssc:100626234|	397057|396623|100624868|100626234|	IL18, IL-18|TLR2| | |	http://www.genome.jp/kegg-bin/show_pathway?ssc05134/ssc:100626234%09red/ssc:397057%09red/ssc:396623%09red/ssc:100624868%09red
Fatty acid metabolism	KEGG PATHWAY	ssc01212	3	45	0.359423	0.993602	ENSSSCG00000017695|ENSSSCG00000013072|ENSSSCG00000012583	ssc:397324|ssc:444997|ssc:448980|	397324|444997|448980|	ACACA|FADS2|ACSL4|	http://www.genome.jp/kegg-bin/show_pathway?ssc01212/ssc:444997%09red/ssc:448980%09red/ssc:397324%09red
Ubiquinone and other terpenoid-quinone biosynthesis	KEGG PATHWAY	ssc00130	1	9	0.364995	0.993602	ENSSSCG00000009238	ssc:100526233|	100526233|	COQ2|	http://www.genome.jp/kegg-bin/show_pathway?ssc00130/ssc:100526233%09red
Sulfur relay system	KEGG PATHWAY	ssc04122	1	9	0.364995	0.993602	ENSSSCG00000007307	ssc:100156145|	100156145|	|	http://www.genome.jp/kegg-bin/show_pathway?ssc04122/ssc:100156145%09red
GnRH signaling pathway	KEGG PATHWAY	ssc04912	5	86	0.378988	0.993602	ENSSSCG00000011750|ENSSSCG00000013034|ENSSSCG00000007058|ENSSSCG00000009123|ENSSSCG00000012279	ssc:100519446|ssc:100525148|ssc:100516581|ssc:397674|ssc:100522002|	100519446|100525148|100516581|397674|100522002|	PLD1|PLCB3|PLCB4|CAMK2D|ELK1|	http://www.genome.jp/kegg-bin/show_pathway?ssc04912/ssc:100525148%09red/ssc:397674%09red/ssc:100522002%09red/ssc:100519446%09red/ssc:100516581%09red
Amoebiasis	KEGG PATHWAY	ssc05146	6	107	0.386846	0.993602	ENSSSCG00000007058|ENSSSCG00000028331|ENSSSCG00000016035|ENSSSCG00000013034|ENSSSCG00000009002|ENSSSCG00000029684	ssc:100516581|ssc:100628112|ssc:397532|ssc:100525148|ssc:396623|ssc:100154420|	100516581|100628112|397532|100525148|396623|100154420|	PLCB4|IL1R2|COL5A2|PLCB3|TLR2|LAMA2|	http://www.genome.jp/kegg-bin/show_pathway?ssc05146/ssc:100525148%09red/ssc:100628112%09red/ssc:100516581%09red/ssc:397532%09red/ssc:396623%09red/ssc:100154420%09red
Homologous recombination	KEGG PATHWAY	ssc03440	2	28	0.387039	0.993602	ENSSSCG00000016488|ENSSSCG00000026989	ssc:100512994|ssc:100626849|	100512994|100626849|	SSBP1|RAD51D|	http://www.genome.jp/kegg-bin/show_pathway?ssc03440/ssc:100512994%09red/ssc:100626849%09red
Wnt signaling pathway	KEGG PATHWAY	ssc04310	7	128	0.392399	0.993602	ENSSSCG00000007058|ENSSSCG00000009123|ENSSSCG00000017756|ENSSSCG00000013034|ENSSSCG00000012102|ENSSSCG00000014435|ENSSSCG00000000759	ssc:100516581|ssc:397674|ssc:100620270|ssc:100525148|ssc:100624648|ssc:100514516|ssc:100516268|	100516581|397674|100620270|100525148|100624648|100514516|100516268|	PLCB4|CAMK2D| |PLCB3|TBL1X|CSNK1A1|WNT5B|	http://www.genome.jp/kegg-bin/show_pathway?ssc04310/ssc:100525148%09red/ssc:100620270%09red/ssc:100516581%09red/ssc:100514516%09red/ssc:100516268%09red/ssc:100624648%09red/ssc:397674%09red
PPAR signaling pathway	KEGG PATHWAY	ssc03320	4	68	0.397597	0.993602	ENSSSCG00000013072|ENSSSCG00000005648|ENSSSCG00000014257|ENSSSCG00000012583	ssc:444997|ssc:100155567|ssc:100517271|ssc:448980|	444997|100155567|100517271|448980|	FADS2|SLC27A4|SLC27A6|ACSL4|	http://www.genome.jp/kegg-bin/show_pathway?ssc03320/ssc:444997%09red/ssc:448980%09red/ssc:100517271%09red/ssc:100155567%09red
Melanoma	KEGG PATHWAY	ssc05218	4	69	0.407706	0.993602	ENSSSCG00000007268|ENSSSCG00000012275|ENSSSCG00000010872|ENSSSCG00000009609	ssc:100153846|ssc:397601|ssc:100513811|ssc:100155720|	100153846|397601|100513811|100155720|	E2F1|ARAF, ARAF1|AKT3|FGF17|	http://www.genome.jp/kegg-bin/show_pathway?ssc05218/ssc:100153846%09red/ssc:397601%09red/ssc:100513811%09red/ssc:100155720%09red
Chronic myeloid leukemia	KEGG PATHWAY	ssc05220	4	69	0.407706	0.993602	ENSSSCG00000007268|ENSSSCG00000012275|ENSSSCG00000010872|ENSSSCG00000011226	ssc:100153846|ssc:397601|ssc:100513811|ssc:100038019|	100153846|397601|100513811|100038019|	E2F1|ARAF, ARAF1|AKT3| |	http://www.genome.jp/kegg-bin/show_pathway?ssc05220/ssc:100153846%09red/ssc:100513811%09red/ssc:397601%09red/ssc:100038019%09red
Proteoglycans in cancer	KEGG PATHWAY	ssc05205	10	192	0.407999	0.993602	ENSSSCG00000027189|ENSSSCG00000030072|ENSSSCG00000009123|ENSSSCG00000012279|ENSSSCG00000013297|ENSSSCG00000012275|ENSSSCG00000010872|ENSSSCG00000009002|ENSSSCG00000000759|ENSSSCG00000004977	ssc:100626700|ssc:100157656|ssc:397674|ssc:100522002|ssc:100525150|ssc:397601|ssc:100513811|ssc:396623|ssc:100516268|ssc:100170132|	100626700|100157656|397674|100522002|100525150|397601|100513811|396623|100516268|100170132|	PPP1R12C|IQGAP1|CAMK2D|ELK1|CD44|ARAF, ARAF1|AKT3|TLR2|WNT5B|NANOG|	http://www.genome.jp/kegg-bin/show_pathway?ssc05205/ssc:100522002%09red/ssc:100157656%09red/ssc:397601%09red/ssc:100626700%09red/ssc:100525150%09red/ssc:100516268%09red/ssc:396623%09red/ssc:397674%09red/ssc:100513811%09red/ssc:100170132%09red
Endometrial cancer	KEGG PATHWAY	ssc05213	3	49	0.408042	0.993602	ENSSSCG00000012275|ENSSSCG00000010872|ENSSSCG00000012279	ssc:397601|ssc:100513811|ssc:100522002|	397601|100513811|100522002|	ARAF, ARAF1|AKT3|ELK1|	http://www.genome.jp/kegg-bin/show_pathway?ssc05213/ssc:100522002%09red/ssc:397601%09red/ssc:100513811%09red
[truncated: 169 more rows]
