# Supplementary material for: The long non-coding RNA LNC_000397 negatively regulates PRRSV replication through induction of interferon-stimulated genes
Source: Virol J. 2022 Mar 5;19:40. doi: 10.1186/s12985-022-01761-x (PMC8897765; doi:10.1186/s12985-022-01761-x)
Supplement: Supplementary file 8 — Additional file 8: Table S7 Lists Real-time primers and siRNAs used in this study. [file 12985_2022_1761_MOESM8_ESM.xlsx]

## Sheet: Sheet1
ALDB1353F	GAGGACTCTGTGGTGGAA
ALDB1353R	TTGGTGGCTGAATGATGC
LNC_000454F	CTCTGGTTGCGAAGTGTA
LNC_000454R	GGTCTCCGATTATCTGATGT
LNC_000695F	TATCCTGTAAATCAATAGGC
LNC_000695R	CCATTATCTCCTTACAGATG
CD274F1	TTGTGAATGGCGAGGAAG
CD274R1	GCGATATGGAGCATTGACT
PKRF	GCTGGCGTCTTAGATGTAT
PKRR	CGTTCTTCCACTCCTTCAA
CD169F	GCCTCCTCTTCCTACTGT
CD169R	GCATCATCACCGATTCCA
RNASELF	GGCTGCTCCAACTCTTAC
RNASELR	GTCTGCTCCATTCTCATACA
ALDBSSCT0000002761F	CTTCCTGCTCTGCTTCAC
ALDBSSCT0000002761R	TGACACAACAACACTCCAA
LNC_000397F	AAGCAGTGGTGAGGTATTC
LNC_000397R	GTGAGATGGCAAGGTAGTT
TNFSF10F	TTCACTTGAGGAATGGAGAG
TNFSF10R	CACCTTGATAGATGGAATAGAG
siLNC_1	GCAUCAUUCAGCCACCAAA
siLNC_2	CCUCCUCUCUUAUCUUACU
siLNC_3	AAUGAUAAUAUUUACACGCAC
siLNC_4	UCAAUCAGGCAGGAAAAACCU
LNC_000397_si1	CCGUCUAACCCUUUAGCUU
LNC_000397_si2	GCUUGCAGAUAGCAGCCUU
